# Supplementary material for: A ribosome assembly stress response regulates transcription to maintain proteome homeostasis
Source: eLife. 2019 May 24;8:e45002. doi: 10.7554/eLife.45002 (PMC6579557; doi:10.7554/eLife.45002)
Supplement: Supplementary file 1. [file elife-45002-supp1.xlsx]

## Sheet: Supplementary File 1
Supplementary File 1
Rpb1 ChIP-seq at the indicated times following either auxin or vehicle addition to the media in Top1-AID, Top2-AID or Top1-AID Top2-AID strain. Category (cat): Hsf1 genes (Hsf1), Ribosome Biogeneisis genes (RiBi), Msn2 genes (Msn2), Ribosomal Protein genes (RP). Postion of each ORF in the chromosome is indicated (Chr, Start, End).
#chr	start	end	cat	Top1-AID 20min Veh	Top1-AID 60min Veh	Top1-AID 20min Aux	Top1-AID 60min Aux	Top1-AID Top2-AID 20min Veh	Top1-AID Top2-AID 60min Veh	Top1-AID Top2-AID 20min Aux	Top1-AID Top2-AID 60min Aux	Top2-AID 20min Veh	Top2-AID 60min Veh	Top2-AID 20min Aux	Top2-AID 60min Aux	name
chrI	1788	2191		0.699603	0.75871	1.23166	0.643499	0.639206	0.594467	1.79266	2.73819	0.925533	0.519851	0.36397	0.611216	YAL068C
chrI	11698	14645		19.3317	19.8927	28.044	21.7416	17.6194	18.2826	40.7094	52.0164	21.9252	19.917	20.3258	20.1615	YAL064C-A
chrI	21341	21981		3.83283	3.73241	6.86031	4.30422	3.94028	2.93283	15.1156	14.6165	3.28958	4.011	2.96995	3.74427	YAL064W
chrI	23940	28043		12.6879	12.5858	16.8989	13.4843	11.6724	11.8171	21.1509	27.1991	14.0738	12.5101	12.3493	12.4041	YAL063C
chrI	31187	33041		24.8092	22.8237	28.1068	20.6134	19.7098	21.597	39.6486	40.3816	25.2109	23.6972	21.227	25.5702	YAL062W
chrI	33222	34864		31.4637	31.8686	36.5021	28.0174	25.8145	29.0399	49.6255	63.4497	36.9107	32.3802	27.9447	31.2712	YAL061W
chrI	35056	36421		55.3803	55.4203	61.906	50.4221	50.22	52.78	67.9141	77.0564	61.3541	55.4222	48.7968	54.1322	YAL060W
chrI	36508	37275		46.4491	52.2011	49.8337	59.4817	56.211	50.7023	49.4726	38.446	47.5872	51.9569	45.3981	50.6918	YAL059W
chrI	37379	39106		16.8762	15.4112	16.9664	18.2654	15.1028	15.1809	18.7509	30.1458	17.2091	16.3322	14.653	15.3406	YAL058W
chrI	39204	42030		27.7411	27.4641	32.4228	26.6883	26.404	26.3924	38.8638	37.6084	26.06	25.9381	26.523	26.6708	YAL056W
chrI	42154	42862		17.1422	14.8462	20.0528	16.5805	14.5534	14.9003	22.3173	28.8757	17.505	15.8542	15.274	15.6168	YAL055W
chrI	45743	48316		34.8408	32.1288	39.487	38.4212	31.4434	31.6993	51.2433	62.8225	33.7384	32.121	30.6537	34.954	YAL053W
chrI	48538	51858		20.9096	20.8659	23.1435	22.513	20.831	19.8822	29.5663	46.0466	18.6697	20.3113	20.239	21.0161	YAL051W
chrI	51739	52660		26.3709	27.8711	31.8377	32.2804	26.2459	26.8702	40.8132	50.7871	29.4982	28.9944	26.5725	27.6795	YAL049C
chrI	52729	54798		18.8741	19.0316	19.5299	20.938	17.0837	17.6059	28.0817	41.9133	19.381	17.9672	17.4749	17.7773	YAL048C
chrI	54925	56885		13.3677	12.7932	14.2506	14.663	12.9746	12.8938	21.1238	29.5073	11.9385	12.8345	11.5283	12.6969	YAL047C
chrI	56919	57390		27.2452	24.4369	25.1725	25.8227	23.825	25.8598	31.3793	42.0929	29.9179	26.1371	23.3283	23.193	YAL046C
chrI	57480	57963		22.7453	20.6535	24.2983	23.8374	22.3736	21.024	36.612	51.7305	27.0725	23.2067	20.2477	24.2328	YAL044W-A
chrI	57867	58475		30.9234	26.6801	41.1909	33.4138	26.6107	28.3683	60.8547	73.6924	39.106	31.9273	29.2403	32.7165	YAL044C
chrI	58632	61092		40.213	38.9256	45.3749	41.7829	39.7892	38.4335	51.5929	62.4338	48.6687	38.9355	39.1448	39.7875	YAL043C
chrI	61268	62656		48.5203	47.9425	56.7245	47.5769	44.578	47.2099	61.986	71.2895	60.0129	50.5576	46.6236	45.8758	YAL042W
chrI	62775	65464		42.9598	41.7871	48.3968	40.1899	42.0206	41.0711	75.5611	50.4739	41.9914	41.6244	41.1965	41.1715	YAL041W
chrI	65381	67849		126.832	127.967	94.4671	122.77	125.24	119.828	82.8073	59.0796	135.086	125.98	128.592	118.849	YAL040C
chrI	68648	69599		47.7135	48.4824	60.8511	49.3201	41.3477	44.7041	72.3941	59.1735	59.1859	51.0532	47.9292	47.015	YAL039C
chrI	71643	73454		718.295	742.829	592.284	595.491	726.375	742.229	264.416	172.416	813.042	757.423	761.001	701.016	YAL038W
chrI	73838	74859		12.7722	12.5556	16.6354	12.1173	12.5187	11.593	32.1799	20.847	11.5632	11.7586	10.4281	11.0441	YAL037W
chrI	74852	76198		57.5	55.9358	52.54	58.212	61.2154	61.1579	52.1507	52.0062	63.6328	58.577	53.1291	55.0708	YAL036C
chrI	76400	79562	1_RiBi	91.4638	90.4975	100.169	106.866	97.8751	91.5716	109.684	120.093	101.567	91.5804	96.9408	94.1143	YAL035W
chrI	79673	80669		29.3927	27.8688	27.9707	26.4095	25.6527	25.4791	34.6495	37.7279	26.0826	26.8626	26.7082	23.9542	YAL034W-A
chrI	80566	82584	3_MSN2	28.554	27.2229	29.9071	28.3582	25.3256	25.7132	37.9928	86.0806	29.4704	27.4839	26.0452	26.472	YAL034C
chrI	82684	83301		34.2722	36.2354	32.1043	34.3665	33.7401	34.5316	32.3007	29.3434	35.8768	34.4255	28.7106	31.9861	YAL033W
chrI	83276	84506		35.9403	35.1756	39.7955	35.7006	32.3532	32.0748	42.1809	52.0388	40.6708	34.0743	33.948	33.1081	YAL032C
chrI	84639	87077		22.8075	21.0885	25.0056	22.7682	20.9381	21.385	33.2928	48.1634	23.4436	22.0368	22.4424	21.9576	YAL031C
chrI	87249	87857		27.195	25.8833	33.4026	23.7477	22.671	21.5417	34.1516	41.0023	24.3504	24.193	21.2432	22.3372	YAL030W
chrI	87756	92523		34.8572	34.3328	38.9577	36.9082	37.3432	35.375	46.3887	36.4942	31.9406	35.3277	34.9774	34.781	YAL029C
chrI	92848	94539		11.9159	10.9237	13.7199	11.9431	10.7804	10.562	25.7327	36.7809	10.4324	10.1435	10.6324	10.1686	YAL028W
chrI	94606	95579		21.7389	22.1637	22.869	22.7586	20.9981	19.8064	25.8906	24.3451	17.8039	20.7639	20.6706	20.4125	YAL027W
chrI	95481	99782		20.1894	19.0057	21.2045	19.3669	18.31	18.8023	23.2646	26.7651	18.0514	18.761	19.4558	18.4667	YAL026C
chrI	100037	101173	1_RiBi	81.8382	88.5423	84.7218	99.4942	95.0487	89.1027	69.4966	51.0326	89.3423	90.2888	81.6662	87.9022	YAL025C
chrI	101279	105965		22.9085	21.9644	20.2841	22.9348	21.7576	22.3353	16.1955	19.8625	19.7305	21.8406	22.245	20.2731	YAL024C
chrI	106141	108695		78.3286	79.0091	74.7786	68.4827	76.9118	78.2557	52.8211	34.806	90.719	78.6144	80.5292	71.3714	YAL023C
chrI	108876	110462		25.2845	23.9752	21.734	23.1781	22.5595	22.9834	12.8919	16.9804	26.7498	24.4374	22.4897	24.7762	YAL022C
chrI	110631	113419		36.1962	35.1772	37.2621	33.8459	33.9436	36.0325	22.7069	26.2755	43.7419	35.9944	37.704	35.5516	YAL021C
chrI	113535	114629		29.126	28.2195	28.8745	28.2634	26.7008	26.4851	16.4979	22.2402	36.7225	29.3088	28.6182	25.6497	YAL020C
chrI	114808	118365		35.1714	36.2207	36.108	38.3883	37.0028	35.1183	22.0193	25.1611	37.3024	35.8697	35.3285	33.9912	YAL019W
chrI	119857	124484		15.874	15.4441	19.8158	16.2115	13.9411	14.5321	18.3496	25.334	15.2281	14.6217	16.4344	16.1246	YAL017W
chrI	124781	126856		51.9722	49.2753	53.8673	50.1493	48.8069	48.4826	50.1318	64.5309	48.3159	48.4068	51.4729	47.8136	YAL016W
chrI	126769	128102		24.2415	21.5969	25.5619	25.5278	21.1589	21.2522	24.7314	37.0809	25.6474	22.6306	19.5228	21.7436	YAL015C
chrI	128086	129071		42.9186	42.5817	48.8303	42.8282	39.1137	40.3129	43.7293	64.6929	46.1356	42.2296	39.764	41.3009	YAL014C
chrI	129209	130589		39.8756	38.1614	47.7111	41.417	37.9475	37.2406	44.2042	56.7437	50.4695	38.4195	39.5038	39.1729	YAL013W
chrI	130734	132084		162.944	139.325	159.522	118.515	144.132	142.879	126.545	100.77	185.428	140.415	143.018	138.049	YAL012W
chrI	132184	134174		26.9696	26.973	36.0252	30.2486	26.7804	26.1508	33.0542	34.9868	29.6704	25.5037	26.5029	27.3316	YAL011W
chrI	134086	135705		21.8027	19.6921	23.8575	21.1591	19.5621	19.0913	27.184	30.684	15.2276	19.4239	18.0267	19.1562	YAL010C
chrI	135828	136758		20.1007	21.3843	23.8136	22.7232	18.9407	19.5176	24.6767	27.2031	21.4771	21.6324	19.0654	20.0695	YAL009W
chrI	136834	137644		18.261	15.8326	20.9841	15.3634	16.0224	14.5483	28.5233	26.9931	12.5781	15.9881	13.8219	17.0873	YAL008W
chrI	137546	138452		49.6942	46.7404	45.5719	38.4438	44.9869	44.8484	41.9461	29.7076	39.2478	43.162	41.8196	39.137	YAL007C
chrI	139355	141660	4_HSF1	492.232	418.484	737.719	310.792	405.171	419.666	468.881	313.095	458.333	413.848	469.528	499.061	YAL005C
chrI	142116	143370	1_RiBi	517.661	494.35	442.967	458.273	543.959	519.696	160.67	93.4724	536.67	504.088	512.865	509.997	YAL003W
chrI	143615	147587		20.2044	19.8667	16.8112	18.7479	17.6263	19.1439	11.7121	18.2552	17.0231	18.0931	18.7286	19.4425	YAL002W
chrI	147560	151202		23.1497	22.8184	23.5134	22.7897	21.9838	21.8933	13.7103	17.3282	20.7126	21.5545	23.9966	21.8957	YAL001C
chrI	152214	153976		44.2516	44.9902	49.9344	46.2107	46.2782	44.9669	71.2112	56.4842	43.617	42.5116	41.8463	41.3974	YAR002W
chrI	153932	154827		52.9433	53.1333	54.9823	48.7807	49.5568	49.2002	55.4475	42.118	50.6081	48.6507	45.5777	43.8212	YAR002C-A
chrI	154919	156781		32.7427	30.6393	35.4679	28.1651	27.8192	29.2775	50.6797	43.1332	28.4571	28.0238	29.4947	28.9568	YAR003W
chrI	156679	158688		42.1727	36.6854	53.5909	39.4885	37.0654	33.8624	66.9223	102.945	39.1096	36.8368	41.941	38.1038	YAR007C
chrI	158846	159881		31.9876	29.7307	34.3192	29.6237	30.372	27.9527	44.2252	41.1868	30.9364	28.8678	31.812	27.7862	YAR008W
chrI	166567	169020		37.5844	37.1268	41.8841	39.5978	37.9168	36.4566	41.7121	50.2281	41.1105	38.8192	37.2939	37.8222	YAR014C
chrI	169223	170392		23.7188	25.2225	28.4427	28.2434	24.4036	24.5374	27.574	30.5746	23.9434	26.2282	21.9115	24.742	YAR015W
chrI	170262	171737		24.4865	24.05	25.496	29.593	21.7767	24.1701	21.3136	23.2799	20.8258	24.7828	20.9969	26.4764	YAR018C
chrI	172135	175167		16.0844	15.796	17.0537	16.7148	14.3714	14.7001	13.4767	20.2264	15.2067	14.8076	13.9155	14.7871	YAR019C
chrI	176662	177189		6.74979	7.83101	9.6715	9.03129	7.29818	5.95008	11.1768	14.7988	8.75613	8.15818	8.23279	8.62651	YAR020C
chrI	183698	184655		26.6076	25.9682	28.1461	24.0846	23.0675	26.3111	21.8943	31.8988	20.5108	23.0536	23.1962	25.0289	YAR027W
chrI	184812	185793		17.1742	17.5382	17.6146	16.1625	16.711	16.3618	18.3753	19.6989	15.4909	15.9019	15.4807	15.4023	YAR028W
chrI	188048	188963		22.2882	21.8499	20.8194	20.5409	19.0372	19.4361	25.5339	25.3423	21.707	19.7818	19.7577	20.1113	YAR033W
chrI	190138	192572		5.30753	4.83109	5.72539	4.35845	4.74887	4.16943	5.84784	12.5192	5.66958	4.32743	3.72341	4.21539	YAR035W
chrI	192564	196350		31.338	32.7997	34.1206	33.0284	31.5741	31.8568	28.4718	36.0762	36.1729	32.9961	34.1442	34.3088	YAR042W
chrI	203375	208127		11.7367	12.1431	15.5034	13.4643	11.2811	11.2038	17.4697	23.5854	14.6234	12.1452	12.4556	11.8792	YAR050W
chrI	225158	226914		39.0497	42.9395	20.2739	43.4741	34.8595	35.7661	31.8813	22.2494	35.7691	35.7978	30.9999	40.0793	YAR071W
chrII	7622	7982		0.190278	0.21175	0.265139	0.102194	0.0683611	0.100083	0.437722	0.604639	0.205583	0.0748333	0.0323333	0.0874722	YBL108C-A
chrII	9818	10551		44.9363	43.7766	54.4701	41.3201	39.2285	39.102	44.0456	43.5078	40.1803	41.6689	38.7527	43.893	YBL107C
chrII	10719	13945		15.3763	16.1149	22.5244	15.2965	14.6483	15.1477	24.4904	35.8747	15.0959	15.4154	16.2841	16.8706	YBL106C
chrII	13988	17964		34.1481	33.7201	34.873	34.8311	33.8879	33.1699	33.709	42.1236	34.074	34.0528	36.0075	33.572	YBL105C
chrII	18146	21315		23.6185	23.1195	22.5714	25.6483	23.0311	22.4952	19.7569	30.345	22.9866	22.3348	22.938	22.8051	YBL104C
chrII	21619	23801		27.748	28.327	26.3245	27.648	26.4674	26.4554	27.956	35.6254	25.0456	26.0157	27.9423	26.0339	YBL103C
chrII	23979	24894		32.0449	31.4495	37.1931	33.0263	28.7458	30.0765	29.7003	42.1605	34.718	32.0514	27.7056	30.9908	YBL102W
chrII	24779	28605		22.1144	20.7863	31.2778	21.0531	18.9177	19.7426	28.6832	42.0181	21.6799	19.5469	22.1678	23.3679	YBL101C
chrII	36735	38964	3_MSN2	93.3762	91.8639	92.7741	76.0547	84.5731	88.8553	63.9061	61.4442	109.731	94.2509	112.382	99.4716	YBL099W
chrII	39114	40626		10.3377	10.7255	9.39534	9.81209	9.1705	9.41191	15.0463	12.7785	8.68181	10.6458	11.3157	11.2958	YBL098W
chrII	40772	43100		34.747	34.6858	35.2991	36.7672	34.597	33.9516	39.0712	45.4782	32.1699	33.346	36.1768	32.8356	YBL097W
chrII	43260	44209		40.266	41.6738	44.7018	38.7058	41.6612	44.0622	57.3065	66.9987	45.7084	42.4703	42.4817	42.3149	YBL095W
chrII	44105	45016		43.1627	40.053	41.7722	36.0821	40.33	41.9213	54.8523	64.8341	39.7832	36.8094	34.9526	39.0846	YBL093C
chrII	45514	46440	2_RPG	492.708	515.99	105.364	486.263	534.474	521.825	51.7897	57.9008	518.002	529.934	502.243	454.132	YBL092W
chrII	46494	47192		73.3544	73.9309	31.0951	58.7795	71.6922	67.8909	31.404	33.2696	81.288	71.5523	65.2543	62.1847	YBL091C-A
chrII	47272	48694		31.82	32.2032	32.6585	34.1813	29.1494	30.693	48.9351	57.4607	38.1183	30.872	32.7636	30.5917	YBL091C
chrII	48793	49478		42.2644	41.4225	36.83	41.0315	41.9868	40.9579	34.8173	35.8668	40.4739	42.6046	37.8684	37.0214	YBL090W
chrII	49557	51025		25.7636	25.4812	26.2836	24.961	24.003	25.1263	27.1234	35.603	22.6798	24.9408	24.4666	23.9016	YBL089W
chrII	50930	59654		19.1803	18.2718	15.8155	18.8712	18.1555	18.4802	14.5693	21.3387	15.7329	17.6445	18.656	17.7308	YBL088C
chrII	59721	60821	2_RPG	236.092	230.864	69.0779	213.95	252.501	241.932	56.231	50.3363	230.875	238.154	225.755	209.961	YBL087C
chrII	61159	62682		20.8143	22.179	25.9499	23.3144	19.2311	19.6893	42.7291	69.9124	23.2149	20.821	22.7448	20.361	YBL086C
chrII	63684	66936		34.6003	35.2562	35.6028	35.0207	33.4641	34.1255	28.4686	28.7677	38.2766	34.188	38.8943	33.9193	YBL085W
chrII	67042	69568		24.4506	25.2395	29.2237	25.038	24.254	24.4056	26.5006	30.5899	23.3255	24.2987	25.5727	24.8597	YBL084C
chrII	69657	71172		24.1813	25.7329	25.5011	28.2104	27.02	24.9022	22.6898	29.7195	31.7685	26.5441	24.1026	25.336	YBL082C
chrII	71551	73031		61.6881	60.1283	55.4073	67.1054	67.9729	62.4819	44.5404	41.621	69.9178	62.3904	65.9869	60.4839	YBL081W
chrII	72984	74710		17.5389	17.4173	17.5297	17.7681	15.0889	15.8923	25.8798	26.7073	17.5133	16.0225	15.46	16.1802	YBL080C
chrII	75195	80047		39.4415	40.0071	39.5194	43.2056	40.88	40.0974	36.7813	34.2531	37.0054	39.7566	39.7702	39.5395	YBL079W
chrII	79893	80790		17.6714	14.2093	22.5305	15.2543	11.9884	13.1481	20.053	28.9096	11.2069	13.3687	13.7064	16.4348	YBL078C
chrII	80951	84306	1_RiBi	97.7134	100.435	95.7997	106.031	105.443	102.539	77.2326	79.163	98.4052	100.741	104.605	98.947	YBL076C
chrII	88414	89500	2_RPG	384.869	385.899	110.985	381.595	408.9	413.67	93.1698	61.9833	391.568	396.511	384.6	358.618	YBL072C
chrII	89942	90474		70.7395	74.9446	46.0922	82.3922	79.3006	74.4008	47.8763	43.5032	75.6411	78.3	63.7158	69.2089	YBL071W-A
chrII	90630	92172		32.5942	31.6824	25.9233	31.2802	32.8183	32.5973	35.6025	28.8307	30.6919	32.0621	30.7325	29.0315	YBL069W
chrII	92335	93524		33.8978	34.2194	29.925	38.283	36.4142	35.2884	28.3218	23.6591	34.4902	36.6551	33.724	35.1909	YBL068W
chrII	93550	96168		25.8304	26.4892	30.8673	27.6676	27.1436	26.4031	46.3707	33.7178	23.2981	26.2384	25.907	27.6124	YBL067C
chrII	96338	100155		28.1279	28.6798	31.7965	31.3708	27.1044	28.0567	39.2121	48.0004	29.5732	28.6159	29.9999	29.4487	YBL066C
chrII	100298	101223		21.1951	21.7155	35.753	22.5576	16.9578	19.0566	44.1716	67.1403	21.1871	21.3098	19.5552	23.9203	YBL064C
chrII	101868	105325		16.5229	14.7806	21.6172	16.0198	14.7904	15.3466	23.2163	20.2697	14.2995	14.8046	15.9837	15.4372	YBL063W
chrII	105211	107505		38.7105	39.1408	41.9695	44.7368	38.6569	39.5095	40.048	34.5425	38.5325	38.4335	39.8595	40.3005	YBL061C
chrII	107894	110041		22.7883	23.1312	31.2104	26.8378	23.0464	22.1323	39.6356	40.4753	21.3272	23.5738	21.4852	24.2347	YBL060W
chrII	109880	110570		30.089	33.3636	33.5074	32.4294	29.1933	28.9489	40.2498	41.5319	24.8996	31.3854	29.0922	31.0712	YBL059C-A
chrII	110593	111357		36.3707	34.5584	38.1155	34.7838	32.836	32.5712	41.6059	43.9891	31.2618	34.6977	31.0012	29.9598	YBL059W
chrII	111395	112826		53.5377	52.9522	86.7659	55.1396	48.5354	51.644	88.6218	104.728	61.054	50.9377	53.9034	56.2036	YBL058W
chrII	112728	113457		41.3025	36.8056	45.414	40.2252	38.4309	35.5654	54.349	50.684	40.4718	37.876	35.035	35.5409	YBL057C
chrII	113625	115562		62.1519	61.8959	80.1073	62.1405	60.9417	61.7446	75.2091	71.5532	58.7117	60.543	60.8867	60.3007	YBL056W
chrII	115476	116829		33.6925	34.3748	46.9594	36.4744	35.5769	34.5286	66.2129	55.5603	32.6262	35.1954	31.0335	36.2516	YBL055C
chrII	117473	119361		37.8539	45.8637	43.4118	52.2554	48.7073	48.6836	48.3595	44.5988	44.7101	47.3824	34.3334	46.7283	YBL054W
chrII	119304	122140		22.2349	22.2959	21.9534	22.8875	22.2436	22.6489	21.8884	26.1812	17.2938	21.6431	21.2975	20.8915	YBL052C
chrII	122305	124843		40.8411	38.6066	44.6699	43.3313	40.88	40.2311	60.7993	64.0133	40.1834	38.9581	40.8583	40.0298	YBL051C
chrII	125037	126182		33.1931	32.9541	38.9166	34.5465	30.5994	32.4666	56.489	80.2566	34.3155	30.8437	33.5786	32.6273	YBL050W
chrII	127685	132205		46.6591	46.7648	52.2114	48.9929	44.3309	45.9346	57.8022	65.2415	50.0466	46.7044	48.7164	46.2379	YBL047C
chrII	132402	134043		30.9823	29.1886	31.9173	30.2491	28.6693	28.3144	39.4529	42.3327	30.6378	28.5665	29.789	27.556	YBL046W
chrII	133813	135701		59.9948	58.2124	69.6864	50.0403	49.8655	57.017	70.5398	78.8473	66.3184	62.1385	70.9269	61.4143	YBL045C
chrII	136488	137611		5.88332	6.15068	8.4845	7.5975	5.69843	5.39753	12.3167	30.5583	6.46361	5.83687	5.60198	7.35098	YBL043W
chrII	138076	140348	1_RiBi	66.4499	69.6571	68.9429	65.6446	74.5599	72.4889	62.8206	63.3696	69.7748	71.8726	71.3172	69.635	YBL042C
chrII	141032	142020		94.6224	86.4305	125.37	84.9251	85.8058	86.9438	123.382	146.721	92.6196	88.3801	86.2561	96.5486	YBL041W
chrII	142112	142910		63.5402	62.774	75.6074	54.6311	60.1694	59.7083	97.4362	75.1496	52.3295	60.8536	57.6915	56.1132	YBL040C
chrII	143085	143726		19.5242	15.0203	20.0389	13.5084	14.9209	15.1761	41.5974	31.6746	11.2777	14.2221	13.1665	15.0518	YBL039W-B
chrII	143882	145817	1_RiBi	77.5252	84.822	83.9881	90.9213	95.822	92.5088	83.9626	53.2645	86.2248	89.9458	75.9867	85.634	YBL039C
chrII	146097	146979		53.8795	50.4248	49.3247	48.9823	48.1552	53.751	53.0836	57.4525	51.5785	53.6068	50.6586	48.434	YBL038W
chrII	147110	150427		21.3398	21.1057	24.7685	20.4759	19.2275	21.112	33.2886	32.7329	17.6062	20.3335	21.4109	20.9695	YBL037W
chrII	150299	151268		39.5303	41.9227	47.516	41.0189	38.9069	40.294	57.7663	47.1617	33.0631	39.3588	39.8992	40.0792	YBL036C
chrII	151409	153702		37.3634	34.4259	37.5871	34.1548	35.8695	32.8961	46.0108	37.806	36.1243	34.0644	38.0977	31.9975	YBL035C
chrII	153847	158450		21.5665	20.5665	21.3291	22.0647	20.7843	20.1504	29.531	27.9797	18.3537	20.127	20.8703	18.6198	YBL034C
chrII	158539	159720		51.2982	50.3323	62.7474	43.0619	45.813	46.4736	60.5113	65.7711	61.645	53.3318	55.6983	50.816	YBL033C
chrII	160085	161524		34.9237	35.5718	37.6118	32.2753	34.9055	32.1032	46.3666	54.8174	41.6845	36.4425	36.7313	33.3671	YBL032W
chrII	161660	162861		30.6853	28.5915	32.7751	25.8326	27.5734	27.8012	40.8839	31.3073	27.3066	29.1592	29.8843	26.6726	YBL031W
chrII	162739	164144		150.119	149.388	166.433	124.639	134.485	143.578	155.739	147.068	176.041	149.267	167.889	151.935	YBL030C
chrII	164346	164890		43.8092	43.5503	51.1601	30.4755	35.0184	36.8117	70.3574	49.7275	34.8675	41.5336	38.7018	36.9967	YBL029C-A
chrII	166065	167470		25.5545	25.2392	31.4912	24.5887	27.8245	27.4252	48.2428	31.913	20.852	24.8405	24.2897	25.2528	YBL029W
chrII	167233	167895		57.0125	59.5014	43.7904	60.9033	65.5423	67.1645	48.2247	32.9239	48.7769	62.0149	49.2282	58.3076	YBL028C
chrII	168391	169467	2_RPG	334.203	344.771	72.7418	334.44	364.683	356.792	43.7353	52.0445	374.468	349.935	353.427	309.259	YBL027W
chrII	170551	171166		61.7335	60.0432	50.356	57.5464	61.2973	62.8205	42.3611	47.3042	41.2943	61.1729	51.9855	56.3317	YBL026W
chrII	171412	172208		34.065	34.1024	30.5814	32.0348	30.5044	31.4071	33.1044	39.8651	32.1699	32.3288	29.5171	31.3848	YBL025W
chrII	172471	174664		57.0983	55.7034	49.3751	59.5108	59.7181	57.3816	49.5191	39.3897	55.4882	57.0071	58.0959	56.5651	YBL024W
chrII	174707	177578		23.5491	23.8602	25.8087	26.4147	22.6447	23.3425	38.1634	33.7122	24.84	24.627	24.8232	25.7333	YBL023C
chrII	177796	181407		46.6228	42.5824	69.2941	45.0039	41.1495	41.5045	55.3246	66.4998	48.1252	42.0218	45.8368	48.2226	YBL022C
chrII	181488	182125		37.4708	34.9829	43.1718	39.4625	35.9712	32.9816	41.97	64.7906	43.5213	35.08	32.6609	34.5633	YBL021C
chrII	182328	184225		26.0763	24.2029	27.0835	25.7909	25.8333	24.025	29.2265	37.152	23.7109	24.0506	24.0013	23.6362	YBL020W
chrII	184300	185960		20.4069	19.1894	23.3914	21.0465	17.8769	17.8517	28.7983	26.2498	18.5912	18.2956	18.1601	18.9186	YBL019W
chrII	185932	186528		38.8805	39.2269	37.2323	40.9411	40.2891	39.3071	30.5585	27.8654	28.6358	38.9516	32.3261	34.9181	YBL018C
chrII	186772	191787		35.4558	35.6527	36.1946	34.8607	35.5518	35.4378	23.4578	31.5194	35.27	35.1853	36.4486	35.0562	YBL017C
chrII	192360	193648		35.7979	35.9068	32.0603	35.1193	34.8085	34.896	22.8686	37.9909	39.2708	37.3214	32.5717	35.5583	YBL016W
chrII	194018	195976	3_MSN2	13.1807	13.9899	18.7637	12.092	10.7269	11.7777	18.8574	41.1524	15.8516	12.9612	13.3782	13.987	YBL015W
chrII	198952	201776		30.7293	33.4147	34.9621	38.5442	34.7439	32.3453	30.158	38.9744	31.9311	32.239	31.459	34.0998	YBL014C
chrII	203436	206020		37.6633	35.9858	51.2946	35.1699	32.9005	35.0168	46.4045	57.0323	41.1624	34.1842	37.4789	38.4333	YBL011W
chrII	205930	206983		34.5728	33.0456	38.1243	33.8044	31.9059	32.1752	33.384	45.2027	33.7071	34.2694	32.9469	33.3204	YBL010C
chrII	207159	209352		32.8359	33.0744	31.6539	33.7462	33.872	31.8135	27.6878	36.9363	31.9178	32.7709	33.1172	30.5885	YBL009W
chrII	209496	212270		16.7589	17.2113	17.8482	18.2738	16.7163	16.3682	17.7035	29.3664	15.9432	16.0165	15.2221	15.4918	YBL008W
chrII	212546	216420		43.1431	42.3801	42.6459	41.4429	40.5918	40.6547	36.4758	49.4414	47.8472	41.6166	45.5108	41.5798	YBL007C
chrII	216412	217159		70.7637	70.0742	66.4553	63.8451	63.774	69.4721	45.864	47.8673	80.1256	73.1779	62.4604	64.0475	YBL006C
chrII	217398	220591		58.7328	56.6778	82.1604	50.8795	50.7928	54.6811	56.9567	64.886	47.0522	51.6658	48.5109	59.2069	YBL005W
chrII	227528	235177	1_RiBi	43.9829	46.9514	42.338	53.0468	48.8412	48.0687	24.1695	23.7179	38.7819	46.1096	42.0093	45.6686	YBL004W
chrII	235219	235855		360.28	360.877	308.016	261.833	358.298	354.244	98.6643	64.1454	363.352	363.298	339.378	293.289	YBL003C
chrII	236363	237145		313.797	310.501	251.572	228.082	313.378	315.837	78.9545	53.2134	320.683	314.808	299.234	253.074	YBL002W
chrII	237086	237572		64.8617	59.4774	55.3288	47.9476	56.7873	55.0483	34.0045	26.4995	59.0633	57.7951	48.1167	47.2912	YBL001C
chrII	238763	241446		24.5864	23.1549	29.7483	22.2658	20.3751	21.0616	41.2815	39.4302	21.4792	22.0592	23.042	24.5711	YBR001C
chrII	241592	242601		69.1341	72.5825	73.7179	66.7378	70.6375	68.5182	75.7439	52.2466	71.6181	71.0712	64.4041	68.4691	YBR002C
chrII	242774	244351		26.2668	24.7087	33.7655	24.4349	22.7694	23.8287	49.866	51.7915	25.5246	24.6259	24.5806	26.3344	YBR003W
chrII	244272	245682		28.1719	27.0748	26.7993	29.0647	27.4928	26.2945	33.0158	33.8463	19.1778	25.9863	23.1132	27.8641	YBR004C
chrII	245816	246693		26.0979	25.6434	28.2372	29.0027	22.0709	24.0295	37.581	39.5664	24.2069	24.6106	21.4204	25.8411	YBR005W
chrII	246878	248646		23.96	20.9479	29.5651	22.0346	20.5176	19.8383	45.0198	63.3589	19.6581	20.2175	20.5644	22.8114	YBR006W
chrII	248676	251161		29.464	27.4042	42.0274	29.6235	28.036	27.0044	45.3726	48.0326	27.186	27.2289	26.4045	28.4269	YBR007C
chrII	255207	255781		436.623	423.664	406.455	359.082	422.436	416.574	129.306	131.405	389.867	415.695	393.867	364.821	YBR009C
chrII	256302	256903		455.009	447.721	419.514	373.993	434.892	439.365	150.833	143.223	445.672	452.901	427.813	386.992	YBR010W
chrII	256998	258041		120.592	114.994	120.849	102.271	114.757	109.816	99.0185	80.8303	129.892	117.538	119.657	107.156	YBR011C
chrII	265157	266235		0.267588	0.125724	0.0829777	0.112792	0.0305566	0.151549	0.506642	1.12841	0.0797959	0.0453061	0.00987013	0.140724	YBR013C
chrII	266617	267418		25.9675	27.3853	29.8352	25.0283	24.3355	26.2076	24.3425	21.2739	22.605	24.5507	22.8096	25.3134	YBR014C
chrII	267575	269595		45.7698	46.799	44.6127	45.5073	45.8584	44.9798	44.1679	43.0402	44.918	46.4655	46.233	42.9352	YBR015C
chrII	270209	270841		50.0912	45.9054	58.7975	44.8718	44.3498	44.7742	63.5359	63.0838	57.1638	48.5418	43.5125	51.7543	YBR016W
chrII	270843	273769		37.7953	36.3681	40.1127	41.694	38.3358	38.0707	42.3803	43.8814	34.8028	36.554	37.1572	37.7783	YBR017C
chrII	281306	283509	1_RiBi	38.555	38.3752	32.7647	37.9947	38.1895	39.3252	29.652	32.2859	36.2357	39.3232	39.2718	38.7212	YBR021W
chrII	283660	284421		37.703	33.5861	36.1355	33.7916	32.1272	31.9806	35.3444	31.2431	29.768	35.9156	31.2763	32.5782	YBR022W
chrII	284277	288068		47.0586	47.0912	49.1475	52.0846	46.4009	46.1141	49.1873	43.048	46.6934	47.3976	48.4744	45.7033	YBR023C
chrII	289327	290567		35.0066	31.267	37.8999	30.0404	32.8934	32.1388	71.704	42.6639	28.9883	32.6631	30.8416	32.959	YBR024W
chrII	290475	292038		162.801	153.214	162.359	145.68	159.379	156.667	157.918	96.1193	153.407	155.022	148.091	152.729	YBR025C
chrII	292760	294086		19.1589	18.0907	22.402	17.785	16.4658	17.8093	24.9514	26.222	16.3939	17.6912	18.3457	18.4843	YBR026C
chrII	294280	296101		26.929	24.751	28.0335	25.4182	25.4202	26.5355	23.5819	20.173	24.803	26.5875	25.9742	24.2468	YBR028C
chrII	296295	297821		60.6639	57.2556	63.038	53.1552	56.977	55.439	53.9669	63.9666	56.6673	54.7659	52.8178	53.6634	YBR029C
chrII	298208	300063		40.1465	39.0996	35.5522	39.5463	40.0025	38.2249	31.5282	38.8622	38.93	37.4451	34.2049	36.0555	YBR030W
chrII	300141	301349	2_RPG	304.827	320.294	243.578	317.661	324.239	325.245	143.081	115.446	385.959	331.813	320.804	312.874	YBR031W
chrII	301887	304762		15.833	15.4996	32.0753	14.894	15.6564	14.9739	45.7044	36.6654	15.3525	14.9662	14.3621	16.9947	YBR033W
chrII	304750	306045		82.5241	85.5856	77.4044	99.1165	95.0314	93.3102	60.9415	59.7337	86.6774	94.6352	73.5153	91.0871	YBR034C
chrII	306117	306989		60.5789	57.4124	59.7639	58.1291	55.1256	54.957	55.3469	67.9162	60.078	57.2002	51.0808	58.5574	YBR035C
chrII	308758	310388		50.5027	50.6899	55.2637	51.581	48.8779	49.2121	56.7031	60.9729	55.456	50.6751	50.9049	50.2173	YBR036C
chrII	310496	311500		24.2553	27.0667	28.9002	24.7692	23.5779	24.8894	35.4715	35.2797	27.7437	24.7185	22.5758	21.8684	YBR037C
chrII	311846	314976		35.3484	40.3529	38.1991	44.2488	33.2667	39.1189	30.2792	23.2485	37.4108	40.8609	35.8051	41.4772	YBR038W
chrII	315483	316690		64.738	64.1732	68.3797	54.8402	61.3726	60.8486	60.4467	59.6419	63.6149	62.7034	69.9486	62.3879	YBR039W
chrII	318185	320434		20.119	18.8252	21.1125	19.2515	18.2854	19.3514	27.1403	33.1845	17.2784	19.2234	19.5148	18.2344	YBR041W
chrII	320375	321671		28.3961	27.7522	30.8465	26.6797	26.1144	26.1492	45.9416	40.5678	25.2935	27.4949	26.3928	26.7024	YBR042C
chrII	321757	324093		32.5842	31.4383	35.0685	31.3257	29.6957	30.2964	44.2744	58.5504	32.9373	31.7171	31.3065	31.2979	YBR043C
chrII	324264	326141		27.4405	26.2226	29.0042	25.4965	23.2807	24.746	34.3499	52.4131	24.9631	26.4583	25.0926	25.686	YBR044C
chrII	330467	331583		12.6808	11.5572	9.14634	10.074	9.58332	11.5493	14.8304	25.0563	11.0427	10.6525	12.3224	10.5677	YBR046C
chrII	331823	332426		9.81181	10.0505	5.19647	7.56398	8.50604	8.5176	9.87418	14.7138	8.13191	9.66418	9.4538	7.25723	YBR047W
chrII	332751	334022	2_RPG	269.759	264.22	59.5196	253.867	287.464	273.244	46.1695	34.7937	264.305	274.513	260.853	229.77	YBR048W
chrII	333993	336966		50.9578	48.645	51.7299	46.9311	49.3294	48.9011	57.3703	50.6028	47.1714	47.7584	50.4983	46.9478	YBR049C
chrII	338661	339422		33.3872	30.7056	52.0335	26.955	24.6853	26.793	71.4362	87.8591	31.6375	28.6996	29.3347	31.053	YBR052C
chrII	339554	340774		18.3847	16.0552	25.8283	16.3529	13.3879	14.3956	41.7467	66.8277	15.8042	15.4771	17.5247	18.817	YBR053C
chrII	342648	344498		19.1002	19.5253	31.6953	16.5697	18.0641	18.618	49.082	60.583	17.21	18.8905	19.7619	22.3963	YBR054W
chrII	344476	347321		22.8616	22.5813	22.5097	25.4529	22.9565	23.0154	24.7277	24.2128	21.178	23.6829	22.3748	23.4089	YBR055C
chrII	347808	349422		16.167	13.7525	19.3109	14.6233	11.8004	13.3166	27.5931	33.7889	14.0185	13.7881	15.1668	15.7217	YBR056W
chrII	352070	353402		43.9912	45.0991	44.4196	45.3772	47.2587	46.1528	40.2864	38.4759	42.5347	45.5662	46.4973	45.2811	YBR057C
chrII	353549	356038		24.4197	24.9577	25.4144	28.538	23.2815	24.5959	32.5867	43.8475	21.8835	23.1727	24.2037	24.8806	YBR058C
chrII	356151	356644		38.9214	35.7846	32.832	37.5201	36.9996	37.2698	42.2663	37.2364	28.0156	38.912	28.9806	36.506	YBR058C-A
chrII	356798	360336		30.281	30.1271	35.6667	31.8181	28.5011	29.275	42.2344	48.2221	31.7418	30.1574	32.9203	31.2405	YBR059C
chrII	360587	362631		31.4366	28.5672	31.9501	30.6654	30.1616	29.7974	40.6436	42.1642	29.6087	29.1529	29.4525	29.0493	YBR060C
chrII	364656	365760	1_RiBi	36.7693	38.0132	39.6164	45.8269	39.9081	38.4437	33.9971	36.4028	37.943	38.5005	32.412	37.3569	YBR061C
chrII	365870	366600		43.3643	41.3378	52.4548	48.1255	41.1709	38.2548	52.4708	59.9703	37.5448	39.9845	39.2821	42.4176	YBR062C
chrII	369940	370972		38.1101	44.3916	39.0886	34.6446	34.5732	39.2312	58.4721	41.1336	33.4924	39.3206	34.5614	36.3696	YBR066C
chrII	371982	372934		70.4865	69.2721	122.274	61.7052	62.2327	64.5503	109.169	77.4215	64.1497	62.1799	49.1616	63.9733	YBR067C
chrII	373640	375751		252.182	271.641	243.811	287.295	257.54	267.758	124.407	143.86	272.901	269.146	302.279	267.775	YBR068C
chrII	376406	378537		137.125	153.618	141.619	142.933	151.275	158.6	73.1529	63.8452	147.658	156.333	160.949	154.455	YBR069C
chrII	379159	379986		42.7708	40.5395	53.8169	37.8279	37.408	39.3211	64.4143	42.6046	38.8252	43.5566	39.3131	41.8189	YBR070C
chrII	380327	381564		118.484	106.775	160.86	96.5134	102.41	108.553	126.22	90.7609	115.125	103.807	112.2	113.316	YBR071W
chrII	381955	382841		14.9856	14.0077	29.379	15.274	12.2662	12.529	55.7052	144.393	17.8512	14.6359	14.3378	20.5153	YBR072W
chrII	383139	386052		38.0329	36.5927	46.7007	43.7774	36.9406	35.6326	40.5422	44.242	34.1387	35.0414	39.1028	36.1512	YBR073W
chrII	386280	389333		22.8631	23.2736	24.7194	24.2634	23.1544	22.8735	20.458	20.1948	22.354	23.9838	24.2503	23.4133	YBR074W
chrII	391586	392415		65.2773	65.6228	70.8012	56.6401	58.0807	63.7421	64.1667	67.1149	59.4017	63.8121	57.9546	63.3088	YBR077C
chrII	392946	395237		225.548	235.97	194.719	233.777	244.104	258.121	131.798	155.125	256.144	241.383	258.003	247.657	YBR078W
chrII	395294	398301		101.603	106.177	100.273	121.915	113.385	111.81	81.6304	62.427	114.439	110.499	117.521	110.6	YBR079C
chrII	398439	400931		25.4602	25.698	29.3308	26.0517	24.4226	24.7262	24.599	32.4364	24.4738	24.271	26.9232	25.4368	YBR080C
chrII	401138	405396		23.7715	22.8242	26.752	25.9051	23.5657	23.1975	27.9549	32.4654	21.7171	22.3934	24.1345	23.764	YBR081C
chrII	406459	407287		119.391	109.023	208.023	94.8712	110.603	113.173	181.452	115.202	114.25	104.883	118.574	128.511	YBR082C
chrII	409121	410712		60.5291	66.8075	52.7445	60.1208	58.8323	67.4148	50.3386	36.8383	68.2878	70.3038	63.7741	64.5887	YBR083W
chrII	410970	414143		51.1667	53.5587	42.562	54.13	57.892	55.8062	32.6526	31.6629	58.5265	55.4543	53.5362	51.0462	YBR084W
chrII	414062	415492	2_RPG	286.755	296.996	69.3429	286.669	318.998	303.14	45.5359	51.8863	302.398	300.677	300.953	265.795	YBR084C-A
chrII	415878	417089		8.30969	8.94741	10.5287	8.50267	8.05689	7.676	26.6362	50.9989	7.49244	6.95036	7.92584	8.0887	YBR085W
chrII	418708	419263		48.491	43.533	96.2229	45.7934	35.8056	38.1079	96.8182	122.528	43.223	41.1751	41.0948	50.6927	YBR085C-A
chrII	420077	423357		49.2582	49.5194	50.972	51.7135	49.0517	52.0805	46.3539	52.1535	46.2266	49.5025	55.6443	52.0529	YBR086C
chrII	423734	424881		42.597	41.4292	44.759	42.0659	44.3076	43.2505	41.5831	35.5242	35.2109	43.6701	41.529	41.3564	YBR087W
chrII	424933	425827		90.0348	87.0305	92.1266	78.2256	86.3128	84.1316	110.038	105.688	89.1398	83.2951	92.2158	74.4236	YBR088C
chrII	426013	426911		69.3653	66.1653	74.3334	56.3453	61.6437	61.6411	63.9668	57.3128	74.3023	65.2342	64.9519	65.5348	YBR089C-A
chrII	427064	427524		44.089	43.7952	47.04	48.5663	41.4539	44.0218	47.705	57.4476	44.7831	43.4132	35.8226	40.8113	YBR091C
chrII	427652	429129		49.6468	64.21	48.6508	78.8504	58.6635	64.6404	40.3812	42.2087	54.5853	61.7937	58.257	74.6618	YBR092C
chrII	429490	430995		45.4038	52.8192	44.1072	62.0546	46.5905	50.7765	43.5362	44.5083	47.9848	49.2623	47.2965	57.934	YBR093C
chrII	431969	434388		19.0638	19.757	20.9772	20.0814	19.0381	19.3539	24.3812	23.0868	16.5429	18.3987	17.8704	19.986	YBR094W
chrII	434393	435737		33.0081	31.6742	36.2311	33.611	33.343	33.3021	37.4761	38.2233	31.6082	32.5083	33.0216	31.9359	YBR095C
chrII	435929	436792		35.1762	34.4353	37.8712	34.0606	31.1024	32.886	37.4868	42.7556	26.9495	31.5747	32.0411	33.2847	YBR096W
chrII	436919	441484		13.8195	12.9885	15.6573	13.5327	12.934	12.4511	25.5064	25.5559	9.90921	12.1511	12.9322	13.7849	YBR097W
chrII	441491	443805		25.6055	22.8066	65.3565	23.7186	23.0459	23.2533	131.936	72.8885	21.4207	22.6419	24.2364	31.0555	YBR098W
chrII	443779	444764	4_HSF1	126.368	111.717	298.983	105.309	117.477	112.641	297.912	189.375	112.769	111.998	138.212	147.152	YBR101C
chrII	444714	447400		29.2148	26.611	40.9661	27.6513	26.9283	26.7675	43.2024	39.0995	26.2856	26.3932	27.6715	28.5267	YBR102C
chrII	447542	449365		26.5929	29.2169	27.135	30.0947	26.722	27.2152	19.6612	29.4455	28.7383	28.6991	28.6498	26.2374	YBR103W
chrII	449546	450790		31.8524	32.5941	33.6553	34.4377	33.7682	31.8514	31.7415	37.5552	32.2778	31.7323	31.0851	30.5907	YBR104W
chrII	450763	452037		22.9723	24.6314	34.465	22.0319	23.6452	23.9791	39.8945	62.9236	23.8577	24.8816	19.4039	25.3666	YBR105C
chrII	452618	453365		171.552	173.231	193.68	146.195	171.604	175.488	100.804	123.979	190.251	175.531	165.542	174.08	YBR106W
chrII	453251	454584		45.3386	42.2422	62.6316	35.0023	41.4303	42.0607	65.8099	65.1557	38.6946	42.4365	38.9659	46.4466	YBR107C
chrII	454806	457809		15.8903	15.0246	21.778	17.0248	13.6982	14.8254	32.6342	35.7213	17.9215	14.5078	16.9087	16.6408	YBR108W
chrII	457723	458447		67.3146	68.8269	73.4043	71.2824	63.0783	65.9465	71.7667	90.3586	59.6406	66.8766	66.8581	70.4969	YBR109C
chrII	458656	460331		22.2698	20.7759	20.3327	22.5031	21.1977	20.0899	23.6143	37.0859	18.2491	21.2407	21.0779	21.189	YBR110W
chrII	461102	461873		28.1548	27.1304	34.61	27.0343	26.142	26.3897	39.2204	44.666	27.9032	26.6934	26.8121	28.0287	YBR111C
chrII	462097	462743		27.471	25.288	26.6764	22.0673	25.7519	28.4486	26.8765	24.9479	18.3237	23.5399	22.8006	26.2197	YBR111W-A
chrII	462698	465971		64.3641	66.0264	69.8636	73.1382	66.4014	66.3143	60.4683	53.1266	77.4499	67.762	78.0278	68.7812	YBR112C
chrII	467145	469710		15.5511	14.9531	24.5173	18.5164	14.824	15.6233	29.3523	51.6646	16.0105	15.6271	15.3659	20.1676	YBR114W
chrII	469697	474042		33.5934	33.4792	39.8781	36.1313	33.6964	33.1619	38.1799	47.7298	35.0684	34.164	36.8156	34.2148	YBR115C
chrII	474262	476477	3_MSN2	18.3639	19.3393	20.1292	17.4753	17.8088	18.6817	25.1774	34.8071	21.2126	19.5183	18.4494	19.811	YBR117C
chrII	477648	479138		709.354	702.051	599.158	673.776	700.025	674.589	391.24	291.279	609.663	643.463	646.243	654.238	YBR118W
chrII	479228	480469		35.2665	34.761	34.8738	31.8231	34.8122	34.238	29.6911	20.407	30.9833	34.8235	34.083	33.892	YBR119W
chrII	480368	480992		32.7496	31.1344	31.5614	29.2054	29.4569	33.6116	28.091	23.0376	26.1002	30.1818	29.5221	29.4031	YBR120C
chrII	481260	483459	1_RiBi	72.4771	75.2006	66.2446	79.0163	82.6232	78.91	53.1678	45.5479	77.0522	75.4224	83.7777	77.0302	YBR121C
chrII	483772	484551		64.443	69.6832	68.4604	64.5552	65.406	67.1245	63.0748	65.5035	62.1801	71.5592	63.7087	65.4121	YBR122C
chrII	484683	486758		23.7217	24.777	26.2144	25.9719	24.5324	23.9629	29.2646	45.1092	23.3813	23.6686	26.117	25.0492	YBR123C
chrII	486959	488567		23.7958	24.8121	30.7316	24.0215	21.9821	24.857	32.5125	40.906	23.2945	25.0243	24.9007	26.464	YBR125C
chrII	488773	490498		41.4198	44.6711	59.5735	39.2029	33.8486	38.2349	76.7871	105.036	50.0457	41.0074	46.0163	45.2917	YBR126C
chrII	491101	492889		56.774	59.2274	59.246	57.9676	59.8618	60.4905	58.7277	57.698	63.3621	58.9334	63.6379	59.9822	YBR127C
chrII	492958	494119		21.8073	23.5221	24.7385	22.6233	23.7112	22.5055	26.9229	30.5212	20.1661	21.7091	20.7193	21.7212	YBR128C
chrII	494262	495387		24.804	24.0203	29.1609	23.8873	23.1718	25.2245	26.533	27.8047	22.3558	23.1699	23.9586	25.2972	YBR129C
chrII	495478	496937		40.4326	39.4058	46.7114	41.2897	40.6022	41.7445	49.507	49.1044	37.5376	39.9797	40.7983	38.7016	YBR130C
chrII	497118	499359		15.4066	16.0129	17.6765	17.651	15.3872	14.6409	21.3675	21.8905	14.3673	15.0832	15.708	16.1719	YBR131W
chrII	499347	501593		13.6096	11.727	24.6153	11.2488	11.1615	12.2534	29.1085	38.5202	13.3456	11.3315	13.8193	13.2524	YBR132C
chrII	501682	504434		25.0748	24.1806	26.0908	25.2136	23.4669	24.9558	27.7364	27.0448	24.6246	25.3231	26.0965	24.8308	YBR133C
chrII	504744	505516		33.4548	34.3776	33.2483	33.6801	34.3024	36.0973	32.2943	29.1944	38.534	35.8553	30.7394	35.5045	YBR135W
chrII	505633	512906		11.2399	11.0866	12.2783	13.0522	11.3544	11.0049	15.6131	16.9965	9.60959	10.7436	10.8228	11.162	YBR136W
chrII	512907	513720		25.9236	21.7871	29.1896	27.3232	22.9286	23.1774	30.5441	29.6159	24.1777	22.3645	23.5696	24.2857	YBR137W
chrII	513611	515408		16.0818	16.5814	18.8533	19.9407	15.0004	16.792	26.1852	27.2563	13.8509	15.9125	16.471	17.8806	YBR138C
chrII	515652	517361		22.9199	24.2769	31.3379	22.6423	19.0692	21.0099	36.7256	48.9097	21.7586	21.463	24.7051	24.4442	YBR139W
chrII	517248	526917		21.5844	21.9252	30.8774	24.3224	21.9785	22.6883	26.733	30.4445	18.6599	21.6683	24.3386	24.1324	YBR140C
chrII	526942	528070		31.5362	29.9455	32.8242	33.2796	32.5606	32.0695	31.9317	32.6361	33.3935	32.879	27.3427	31.9951	YBR141C
chrII	528240	530816		30.0892	32.4567	31.5322	39.663	36.5465	36.4124	32.1683	28.2411	30.7206	33.6417	31.7027	36.0671	YBR142W
chrII	530730	532270		87.822	90.7462	88.1445	95.498	96.1944	95.8199	97.9679	63.1436	82.2891	91.1868	91.766	93.0071	YBR143C
chrII	533705	534927		15.5427	15.5774	17.0974	15.4906	15.555	14.7943	22.318	22.898	16.6091	15.4646	17.2338	15.2561	YBR145W
chrII	535170	536300		38.8077	38.4828	37.0005	40.5345	36.7765	38.4471	36.7554	35.5094	40.1575	38.3541	39.0008	38.3378	YBR146W
chrII	539910	541124		33.3481	33.0767	39.3898	33.6163	28.0541	31.703	44.914	57.6313	35.514	30.9312	33.8523	35.3301	YBR149W
chrII	541199	544523		23.6785	22.8415	31.5093	25.3617	23.2228	24.5564	43.234	50.8496	21.5351	23.305	24.5577	25.8814	YBR150C
chrII	544865	546112		45.597	46.8328	51.9994	46.9151	44.5032	45.9533	59.7939	55.6865	46.5981	44.5065	47.1926	43.9788	YBR151W
chrII	548264	549131	1_RiBi	87.2493	88.5757	83.9297	97.7235	94.9822	95.8282	85.2856	57.1265	83.4892	90.0858	90.4066	93.1159	YBR154C
chrII	549673	551020		32.9664	33.7956	37.2676	38.4969	36.017	34.3686	55.5574	41.7171	30.3889	32.8394	31.082	34.3279	YBR155W
chrII	550924	553254		19.2933	20.0865	25.5867	24.9341	20.0282	20.2581	67.8469	49.1074	19.4179	19.8951	22.4562	20.7974	YBR156C
chrII	556285	558348		173.718	159.467	145.66	125.888	184.539	161.693	134.698	45.4399	158.453	153.956	170.165	160.436	YBR158W
chrII	558620	559816		35.4337	35.8768	37.8393	36.9697	34.6259	35.8639	43.93	35.2956	35.8597	37.7392	36.2516	35.4004	YBR159W
chrII	559999	561070		44.5451	43.662	49.1867	48.7264	43.7698	44.8218	59.1656	61.9281	45.7055	42.9207	45.738	45.6108	YBR160W
chrII	561406	563080		25.6262	24.3993	31.5066	20.7868	23.6391	23.9749	59.35	51.7141	22.3828	23.3215	24.0486	22.7192	YBR161W
chrII	562925	564807		112.156	112.951	103.556	120.215	117.993	118.746	103.51	96.9084	130.894	116.901	127.672	113.688	YBR162C
chrII	565167	565517		103.56	110.115	98.2903	101.926	97.3876	110.02	99.6512	96.8178	102.334	106.28	100.074	101.845	YBR162W-A
chrII	565607	567793		26.3386	26.2617	38.8904	27.0892	26.6946	26.8104	83.615	66.2532	22.5767	24.9242	25.8751	28.8243	YBR163W
chrII	567753	568566		37.4045	33.0129	42.0047	38.9403	34.7464	38.0465	61.0622	43.9283	31.5763	32.8254	36.1917	36.7667	YBR164C
chrII	568759	569731		31.2518	31.1298	38.2571	34.1053	29.7677	30.957	40.6953	38.4517	25.0717	29.2353	29.6752	31.6407	YBR165W
chrII	569728	571242		27.8459	27.2257	31.8342	31.1135	28.5809	28.018	42.7432	37.4548	24.6488	27.9407	28.8623	27.5932	YBR166C
chrII	571400	572139		38.243	41.4443	38.0019	40.5473	38.0535	39.9643	50.191	38.3986	31.0987	36.1765	33.6957	40.8497	YBR167C
chrII	572054	573810		15.2041	13.7295	17.2627	16.6236	14.5944	13.9413	36.407	29.6236	11.5883	14.7335	14.4204	14.6861	YBR168W
chrII	573744	576029		10.7412	10.0134	32.3593	8.88078	9.73523	10.2805	87.687	76.2662	12.2716	10.5654	12.3015	16.46	YBR169C
chrII	576209	578135		34.3442	31.303	59.9774	35.2602	29.6439	31.3965	69.6488	87.9771	33.6314	30.7502	33.7475	37.975	YBR170C
chrII	578314	579139		45.9307	43.8612	47.0177	41.3706	46.6922	44.1082	43.7841	40.7256	37.8776	43.8425	44.6476	44.3697	YBR171W
chrII	579048	581490		69.7604	73.7721	71.9164	82.487	80.9037	79.1247	76.087	82.1593	80.8227	74.6822	81.6623	77.522	YBR172C
chrII	581659	582214		78.7097	78.4659	115.887	83.8853	80.852	82.4711	95.6143	138.307	90.1425	83.1349	80.7209	91.192	YBR173C
chrII	582384	583467		31.9864	30.8732	42.8076	37.0742	30.2464	32.0253	46.972	56.3915	34.5857	30.6534	32.7788	33.458	YBR175W
chrII	583601	584804		20.8855	20.7584	27.7114	21.3905	20.7289	19.4738	47.5367	40.0096	19.4937	20.4792	21.2123	20.6	YBR176W
chrII	584645	586234		30.9263	30.2419	38.5095	26.4272	29.1586	27.5349	52.4146	45.7574	33.7272	29.4065	36.2529	29.8765	YBR177C
chrII	586490	589178		20.0194	20.7477	23.2417	22.6275	20.2289	21.1952	32.9533	38.1346	19.8345	19.4599	21.8132	21.1666	YBR179C
chrII	591608	592838	2_RPG	290.016	308.69	77.0304	315.343	334.71	331.636	51.9991	46.3223	335.873	319.619	332.591	296.712	YBR181C
chrII	593230	595017		12.1355	12.2608	9.34508	15.7799	11.0976	12.039	15.8982	34.692	12.5741	12.0124	12.2266	13.0628	YBR182C
chrII	595982	597172		11.4356	11.7036	12.5494	13.3872	10.0147	11.0305	23.0984	55.753	11.2674	12.0917	12.7919	13.5747	YBR183W
chrII	597289	598975		6.40554	6.98549	6.59645	7.00181	6.91864	6.9256	10.4316	8.80438	5.66257	6.03511	7.03559	5.80841	YBR184W
chrII	599080	600010		24.1638	22.5934	26.0616	24.4398	22.685	21.8277	25.6322	28.7557	20.6408	23.1736	24.1901	22.1664	YBR185C
chrII	602499	603637		61.6031	61.6693	57.3469	63.3807	69.6499	63.1805	69.9999	51.9919	69.987	63.2915	69.3425	64.5843	YBR187W
chrII	603610	604205		30.529	27.1206	22.1025	25.06	28.2023	28.0097	33.4889	29.4185	26.3832	26.2769	27.7763	26.2149	YBR188C
chrII	604453	605579	2_RPG	368.14	392.348	98.6418	395.66	424.041	415.702	57.2366	44.2342	402.837	401.181	411.163	371.966	YBR189W
chrII	606247	607270	2_RPG	299.345	317.453	76.3702	322.616	337.786	339.973	49.9883	39.9101	299.786	326.633	328.4	289.504	YBR191W
chrII	607488	609057		33.8594	32.7342	33.9526	34.9181	33.6749	33.8737	44.7741	47.6577	30.3989	32.1076	33.9255	32.1944	YBR192W
chrII	608620	609812		34.639	31.8901	35.3086	35.507	32.7731	35.3861	54.4914	56.5672	33.8769	32.7656	33.8082	32.5082	YBR193C
chrII	609896	610620		27.3184	28.1873	29.262	32.2436	26.821	28.6942	38.1846	48.5241	25.042	27.3372	28.0816	29.4648	YBR194W
chrII	610488	611927		28.041	29.1527	29.1198	32.2295	29.1176	27.9804	31.1534	42.7338	29.8541	28.6949	28.85	30.9233	YBR195C
chrII	612070	614007		204.815	215.141	202.414	192.243	215.422	224.302	134.641	122.579	240.321	216.08	245.329	215.397	YBR196C
chrII	614793	615890		66.3623	70.5583	72.8162	58.6955	70.0051	63.3155	62.4183	45.7342	73.5133	67.4447	66.0009	62.7368	YBR197C
chrII	616053	618600		41.4824	42.8827	61.3645	46.3355	43.2495	42.8252	68.6582	66.4401	45.2561	41.7229	47.2635	44.8012	YBR198C
chrII	618809	620433		38.0753	36.4417	47.7107	39.5902	34.194	35.9426	50.587	60.9289	36.9698	35.3892	39.35	38.736	YBR199W
chrII	620808	622784		17.5374	17.6804	22.4937	21.1806	17.8799	17.4098	24.6682	25.2361	16.446	16.8913	17.0707	18.0189	YBR200W
chrII	623425	624337		16.1726	15.0071	17.3499	13.3581	14.4892	15.6722	18.3048	24.5845	12.2768	15.4595	16.5398	15.8384	YBR201W
chrII	624299	624739		5.9367	5.51836	9.09468	5.41352	6.6363	5.14516	16.3844	38.5718	4.91861	5.23655	6.35105	8.59005	YBR201C-A
chrII	625706	628459		36.9032	37.5447	38.7909	42.2196	38.3291	39.0575	40.3406	33.3873	40.5174	39.4407	39.8582	41.2556	YBR202W
chrII	628972	631961		10.0539	12.3543	15.2406	14.5809	10.0329	11.5007	22.9201	38.1356	10.1678	11.9156	11.1454	14.7156	YBR203W
chrII	631997	633448		11.6455	11.7114	14.4217	11.2215	10.3813	11.4738	20.2291	31.4594	11.2398	11.1755	11.5546	12.5995	YBR204C
chrII	633574	635016		30.2605	32.028	34.8238	30.9661	32.177	29.7654	34.6573	34.7172	31.7208	30.673	30.7948	30.4764	YBR205W
chrII	635056	636662		39.2977	38.9715	42.589	37.8662	38.5442	37.021	45.707	40.5485	41.628	37.4193	41.0102	39.1493	YBR207W
chrII	636576	642305		20.6152	19.249	27.8133	13.9271	21.2502	18.4489	25.0354	25.3217	20.5607	17.8043	25.7596	18.0299	YBR208C
chrII	645327	646194		19.9699	20.1557	17.0166	19.2161	19.8951	19.8993	22.2544	17.4062	15.2323	19.9871	19.1305	18.5536	YBR210W
chrII	646045	647244		25.5092	24.5312	28.9851	26.3828	23.4999	25.6323	31.7475	35.4798	21.8058	26.2581	25.4726	24.6849	YBR211C
chrII	647437	650112		24.4295	23.5262	33.4711	21.2113	22.3233	22.5071	45.794	43.5851	23.877	22.4572	27.1082	24.5036	YBR212W
chrII	651335	653190		20.9535	18.164	28.4925	19.0703	16.1431	17.4955	46.4753	66.9504	20.8559	18.2914	20.8269	19.9429	YBR214W
chrII	653314	655435		24.8068	26.3041	36.465	29.5867	26.1743	25.4765	46.1128	39.3733	25.2183	24.4126	28.4871	27.4872	YBR215W
chrII	655302	657632		21.9393	20.4224	26.8189	23.4684	21.5364	21.392	33.7929	39.8901	17.9455	20.7352	22.1035	21.8723	YBR216C
chrII	657767	658614		22.0446	24.3006	26.2181	25.4753	24.1466	25.1877	29.5845	28.837	19.768	22.8692	22.3008	23.7565	YBR217W
chrII	658593	662391		34.4989	33.6546	45.5384	39.1847	31.2783	32.9922	39.0375	48.4498	41.7591	35.0617	38.9001	37.6107	YBR218C
chrII	662868	664758		19.0347	18.3993	18.9186	18.3402	18.7372	18.8729	18.1932	22.0812	20.9902	19.5362	20.2972	19.6143	YBR220C
chrII	664912	666486		42.2536	41.2842	47.4922	41.5071	41.1153	40.3822	42.9589	48.4703	47.1353	40.5744	45.7409	41.4283	YBR221C
chrII	666604	668392		22.0259	22.4441	25.3585	23.6982	21.3918	21.4392	27.1833	54.4479	26.9142	21.9157	23.7253	22.9625	YBR222C
chrII	668402	670325		15.8159	13.8646	16.7653	14.9608	13.6413	14.5884	16.7918	24.3674	16.1679	14.0274	14.8806	14.7878	YBR223C
chrII	670473	673479		16.4691	16.5313	19.4434	18.5566	15.561	15.8627	20.8974	27.8472	16.0756	16.0579	17.7281	16.9172	YBR225W
chrII	673462	675191		21.0912	20.0108	22.2481	24.1869	20.5584	21.2103	23.4134	29.0748	20.4768	20.9004	20.9313	22.0641	YBR227C
chrII	675312	676341		26.9363	23.3648	26.2501	26.8159	25.483	26.308	26.2798	32.8817	24.4934	24.9044	24.9269	25.4329	YBR228W
chrII	676225	679247		16.5716	17.4555	25.8885	17.9467	16.1455	16.4132	32.4122	37.7095	17.0476	16.7456	18.0968	18.3344	YBR229C
chrII	679384	680106		29.219	28.9036	40.2536	20.0684	22.7872	27.4604	40.0996	44.2185	30.9725	27.4516	31.0009	29.6114	YBR230C
chrII	680283	680696		168.289	169.384	172.981	143.383	156.469	164.231	164.143	139.25	183.548	166.734	142.738	169.481	YBR230W-A
chrII	682138	683146		34.3367	34.8026	52.511	38.4206	33.1083	34.029	48.3846	57.747	40.5219	33.2759	32.3871	38.6998	YBR231C
chrII	683348	684830		20.8513	19.8504	24.859	20.5282	19.5899	19.6317	26.7984	28.2186	21.0352	20.573	21.6238	20.4249	YBR233W
chrII	684933	685497		24.9029	25.3407	28.8112	26.8223	23.587	27.4727	37.4338	29.5102	22.2174	25.0365	25.8552	23.9954	YBR233W-A
chrII	685396	686637		34.9841	33.0948	48.6347	36.5786	35.6084	34.0688	49.3113	53.3588	36.6593	34.4867	39.6769	33.4501	YBR234C
chrII	686819	690355		15.02	15.5445	25.5213	18.6034	15.4808	15.8873	34.2891	40.6069	16.4803	15.1435	16.7248	17.7936	YBR235W
chrII	690241	691742		31.355	29.648	38.8426	35.8585	31.274	31.9754	40.3858	54.413	28.3157	29.6718	32.0361	32.6018	YBR236C
chrII	691912	694682		16.9656	18.3535	21.4941	21.1735	17.1647	17.4734	21.6333	24.7731	17.287	17.5932	20.1237	18.2196	YBR237W
chrII	694605	697374		23.6446	25.9171	35.4337	28.9302	28.2657	26.6191	47.4792	38.8597	24.2242	25.5903	26.087	27.3988	YBR238C
chrII	698289	700091		31.1281	33.1534	39.6426	35.8808	34.5563	32.9333	43.592	44.2015	34.513	34.1917	34.2144	35.0276	YBR239C
chrII	700483	702033		6.09257	6.11949	6.11561	6.97906	5.04573	5.91966	7.12407	14.153	6.49005	5.54317	5.94255	6.71287	YBR240C
chrII	702534	704083		6.77292	7.01743	9.04056	7.70837	5.816	6.37597	8.25769	25.7297	8.94567	7.42139	6.92766	7.53924	YBR241C
chrII	704501	705454		43.1708	45.7627	44.8933	56.1705	46.8072	45.9514	35.0759	34.339	44.2159	49.0782	43.7544	46.3559	YBR242W
chrII	705238	706849		22.9905	23.3994	32.6844	24.9432	22.9977	23.6146	35.6114	31.2548	22.8939	23.7001	24.7589	23.8567	YBR243C
chrII	707347	708138		24.0688	21.6687	24.7349	24.9207	22.1493	21.5649	28.9131	26.9471	18.4097	22.725	21.681	22.1999	YBR244W
chrII	708040	711539		31.6495	31.0797	32.4707	34.2411	32.2042	30.6977	25.5422	27.5678	31.3009	30.5594	33.7477	30.7691	YBR245C
chrII	711518	712883		30.4623	30.7209	31.6092	32.4695	31.115	32.4916	24.998	27.3435	28.4321	29.7788	31.0692	29.7285	YBR246W
chrII	712885	714536	1_RiBi	45.6217	49.9116	50.258	62.3481	58.3559	53.7687	38.5936	30.7301	52.1302	52.9699	49.2052	54.2415	YBR247C
chrII	714720	716560		45.7314	49.8051	53.5381	54.3224	51.1569	49.0559	51.6637	46.5847	51.9493	50.2558	50.1887	52.253	YBR248C
chrII	716769	718129		65.8412	70.2782	47.3281	62.4802	69.9918	68.1604	35.9855	29.4621	77.5749	68.8331	70.1472	69.9647	YBR249C
chrII	721321	722431		31.5182	33.166	35.3812	33.4133	34.205	31.9943	28.5581	29.5995	31.3229	32.2777	34.434	33.3066	YBR251W
chrII	722566	723129		52.7122	57.1929	48.3994	49.5966	54.9773	53.655	36.6823	31.1499	61.8783	56.7229	51.4083	47.0664	YBR252W
chrII	723208	723728		42.8062	37.6765	43.0177	42.0118	38.4437	39.1422	36.7922	39.1295	40.2808	40.4116	38.5968	39.6212	YBR253W
chrII	723572	724279		27.7342	26.8444	28.5882	28.8112	25.7154	26.0888	26.8673	29.741	23.1327	25.8188	26.805	26.4536	YBR254C
chrII	724415	726641		18.3639	18.2996	23.2486	20.0272	17.0044	17.2275	30.8259	35.8351	17.4422	17.0211	18.3986	20.2812	YBR255W
chrII	726518	727114		45.4838	44.6894	60.8972	47.1166	39.751	42.1509	52.7458	58.8071	42.9369	44.4856	40.0063	47.2772	YBR255C-A
chrII	727330	728109		32.8766	32.246	38.5291	32.9101	29.41	31.2811	38.7445	60.8103	29.3029	32.9669	32.6344	35.7045	YBR256C
chrII	728853	729866		27.5888	28.1421	29.9846	31.3751	29.4081	27.4088	29.168	30.6844	24.0389	27.6864	26.0738	28.733	YBR257W
chrII	729670	730194		29.2287	26.3241	29.8811	29.4377	31.4116	29.1385	35.994	34.7139	24.7373	29.0405	27.9302	27.2802	YBR258C
chrII	730326	732596		14.3515	14.0256	18.554	17.1275	15.1379	15.145	28.1742	27.7383	12.6753	14.3505	14.2447	16.1434	YBR259W
chrII	732533	734675		21.8344	21.3264	31.7462	24.9602	22.1449	21.7868	38.0112	43.127	22.2098	21.5851	23.0547	24.1832	YBR260C
chrII	734715	735572		31.4495	35.3523	38.4676	36.0377	35.8474	32.6995	31.9018	39.716	39.8349	33.0056	32.6105	34.1217	YBR261C
chrII	735634	736086		51.594	54.4131	60.0742	59.2596	52.7998	55.578	51.379	60.6891	62.4408	56.5295	52.6599	55.5892	YBR262C
chrII	736178	737793		37.032	40.7009	52.4143	43.5938	40.3706	42.7363	56.7146	50.903	48.7534	41.2378	41.5566	42.2911	YBR263W
chrII	737734	738406		33.3136	30.2103	33.5021	30.2171	29.1737	29.9297	37.9406	33.4782	32.8965	29.1045	30.5406	30.7963	YBR264C
chrII	738497	739678		45.7059	48.5862	45.3647	51.6786	52.1707	50.4119	40.4429	38.2247	56.7359	49.5065	46.7148	48.3442	YBR265W
chrII	739823	741132	1_RiBi	55.1414	63.1733	60.6679	76.4022	70.5397	69.5193	44.9802	51.3303	72.0527	66.2747	61.5198	67.8998	YBR267W
chrII	741268	741726		31.235	31.0948	30.386	33.1048	31.7506	32.4378	37.4536	34.4986	33.6501	34.2247	27.9891	32.6977	YBR268W
chrII	742000	742596		20.0397	21.1615	23.2095	20.5933	20.9352	22.2508	22.5697	32.5156	25.5104	22.7515	23.1643	23.4702	YBR269C
chrII	742694	744669		13.9864	15.0769	16.4634	17.1065	15.2574	14.8172	17.2502	20.0046	14.8402	14.8769	15.1543	15.526	YBR270C
chrII	744811	746262		19.8431	22.8769	22.9455	27.1834	24.6976	23.6334	25.6334	23.7913	22.412	22.7478	20.2315	22.3805	YBR271W
chrII	746177	747849		19.0217	18.1095	19.4344	22.615	17.2738	18.7279	27.7452	24.3545	15.7168	17.4399	18.782	18.6408	YBR272C
chrII	747962	749401		21.4212	20.6686	24.6825	23.8585	21.2027	20.7983	24.9522	34.9248	24.0685	20.1995	22.0326	22.9094	YBR273C
chrII	749531	751371		13.4833	13.7357	16.213	15.2815	14.1267	13.8975	17.9928	23.168	13.0383	14.2346	14.1351	14.8261	YBR274W
chrII	751239	757179		19.208	19.2343	22.6566	19.0798	19.3613	18.2257	24.9132	23.2233	17.8667	18.2514	20.7282	17.9693	YBR275C
chrII	757542	760139		18.2963	18.0469	20.9285	20.9915	17.4916	17.9497	23.4707	27.5366	17.9346	18.0629	19.5137	18.8461	YBR276C
chrII	760246	760992		27.2486	27.1712	27.4946	26.5292	25.0176	24.949	27.4126	34.9703	26.059	28.6631	24.1489	26.2189	YBR278W
chrII	761209	762739		36.4512	37.1536	44.6794	40.6209	38.7372	37.7167	46.6046	42.5016	37.8248	37.3183	39.0042	39.1605	YBR279W
chrII	762678	764725		12.9112	12.3778	19.0767	12.6305	10.3037	11.283	36.0421	34.4988	11.7616	11.4519	12.6453	13.5025	YBR280C
chrII	764840	767654		20.2095	20.0509	21.5731	20.8477	19.1849	20.0255	25.9086	27.1278	18.5859	17.942	21.2546	18.7328	YBR281C
chrII	768192	768773		31.317	30.3977	34.9373	30.537	30.795	30.5664	36.374	33.9754	26.709	31.0299	31.8984	30.5923	YBR282W
chrII	768778	770636		71.2198	69.5488	78.1939	71.4474	72.4066	71.0798	66.1122	73.5001	68.7588	69.6111	76.1673	72.92	YBR283C
chrII	770868	773737		7.68447	6.64982	14.4889	9.00419	6.24065	6.7452	20.6095	45.5799	6.77411	7.03735	6.85288	8.98379	YBR284W
chrII	773813	774428		6.0273	6.14663	8.3339	5.58493	6.97901	6.19972	11.4431	17.1043	4.33855	6.09527	5.35319	7.19005	YBR285W
chrII	774686	776381	3_MSN2	62.4289	62.8697	75.8667	64.1874	61.45	62.8271	72.8757	68.697	70.7396	60.0171	68.9561	62.6565	YBR286W
chrII	776537	777966		48.283	47.7118	56.6945	48.7279	43.3018	42.9011	72.3535	64.3958	47.982	43.7051	49.4124	46.5314	YBR287W
chrII	777813	779520		25.6352	26.4546	29.2952	27.2741	25.6349	26.3174	34.757	39.7261	22.0466	24.7939	27.7769	26.9472	YBR288C
chrII	779604	782442		26.8091	27.0046	31.3167	31.1522	27.1304	26.4958	29.4656	41.0496	31.2463	27.4299	29.3836	27.5323	YBR289W
chrII	782549	783658		43.7502	43.636	49.3991	45.6064	44.2087	43.4588	57.1209	54.9691	40.6741	41.0769	47.0286	44.7367	YBR290W
chrII	783626	784607		30.4464	33.1612	43.1631	32.8434	34.5264	32.9695	60.9672	47.132	30.5149	30.4934	31.7133	32.5358	YBR291C
chrII	787005	788647		23.6822	23.5652	27.5955	25.4161	23.6798	23.0301	33.1165	48.1613	21.5868	23.319	23.0072	25.0576	YBR293W
chrII	792779	796655		18.4031	19.603	20.7508	23.1454	18.7143	20.0795	21.5366	32.0735	21.1565	19.1352	20.2241	19.6642	YBR295W
chrII	796531	798600		6.54511	6.65331	3.46677	4.51986	4.57468	5.2457	5.20724	10.1239	4.9848	5.49215	4.74298	7.40851	YBR296C
chrII	800458	802174		9.70739	10.6265	15.6782	10.5952	7.88433	9.6191	25.0872	26.0878	8.16496	10.6255	10.5798	11.4197	YBR297W
chrII	802537	804900	3_MSN2	19.5686	19.2422	28.9304	18.7752	16.8249	17.9301	42.4086	38.1486	19.1271	18.5528	20.7016	20.0868	YBR298C
chrII	805262	807180		19.8206	19.7282	23.6139	20.888	17.698	18.9532	30.1619	29.396	19.3155	20.614	19.0161	20.0816	YBR299W
chrII	809006	809466		2.51746	3.0272	5.59159	2.98187	2.68554	2.63424	14.3651	11.3038	3.02061	2.66137	2.63778	3.24207	YBR301W
chrII	810262	811501		6.43354	7.02023	8.67445	6.5887	6.18644	5.9429	12.2357	11.3054	6.4829	6.60341	7.46349	6.58783	YBR302C
chrIII	9284	11173		7.38105	7.35045	8.12898	8.50894	8.14364	7.74665	9.5256	11.6867	7.74987	7.85596	7.43881	7.52392	YCL069W
chrIII	12365	13029		14.9535	16.4978	15.1517	15.7893	15.5018	15.1166	15.7807	14.4247	12.9219	15.9487	13.6322	14.9089	YCL067C
chrIII	15414	16939		72.7506	54.6511	73.1322	59.1185	65.7928	61.8858	72.7738	44.7	72.3088	59.2261	69.84	47.1759	YCL064C
chrIII	17238	18612		50.2689	47.863	53.5375	48.9533	50.1141	48.4514	70.7433	55.0974	53.7935	50.705	50.0917	47.9965	YCL063W
chrIII	18672	22171		29.7689	27.121	30.103	27.8966	28.1314	26.7111	42.2431	36.7381	26.5296	26.2787	30.3265	25.1462	YCL061C
chrIII	22322	23443	1_RiBi	50.7786	53.0496	48.6663	57.9713	56.525	54.515	52.6903	35.0671	45.2354	52.3702	43.6949	48.1201	YCL059C
chrIII	23532	23991		79.2415	80.1071	74.4848	89.2246	83.6306	83.9158	76.6481	59.1305	84.4183	87.3312	68.1557	78.0296	YCL058W-A
chrIII	23903	24386		65.8095	67.7376	65.4502	62.0254	67.9163	65.3025	71.7846	61.6359	73.5982	70.4073	59.6954	64.3954	YCL057C-A
chrIII	24732	27033		35.7241	33.1041	57.3913	32.9403	30.2737	30.6809	72.4821	83.3654	34.0019	34.0513	35.4329	37.5374	YCL057W
chrIII	26908	27651		39.151	34.121	37.9678	32.4775	35.9962	34.0195	63.5367	43.1644	31.0133	36.2271	33.3918	35.2726	YCL056C
chrIII	27913	29020		90.2465	82.6896	70.1214	66.8364	80.7539	75.2626	73.6552	45.4946	76.5381	81.311	75.1168	65.6882	YCL055W
chrIII	31396	34045	1_RiBi	61.0986	64.8282	66.7603	76.6292	69.8656	64.6049	83.0617	60.8272	61.6517	64.2727	60.3991	64.3907	YCL054W
chrIII	33972	35462		27.4412	26.2733	30.41	26.4758	25.0708	24.2752	45.1349	50.7673	23.0385	26.3769	24.9023	26.3707	YCL052C
chrIII	35555	37658		29.2247	28.1248	33.0956	30.0367	27.998	27.0307	43.2957	50.5441	31.737	27.2798	29.2234	27.8608	YCL051W
chrIII	37719	38862		63.922	55.3715	90.3966	51.2124	57.4276	54.3687	134.584	61.4123	56.2863	55.7755	59.8421	59.7708	YCL050C
chrIII	39588	40796		24.6231	24.2935	29.8924	30.0607	20.0733	21.6412	44.109	52.7607	25.8947	23.7631	21.6518	26.3621	YCL049C
chrIII	43571	44465		21.6743	20.1092	24.0821	18.3635	17.7755	18.3482	23.0078	20.9807	19.316	20.1241	17.5287	18.3624	YCL047C
chrIII	44562	46969		38.8205	36.702	38.5417	38.3337	36.1924	36.0897	42.1118	46.1179	35.314	37.1298	36.9381	35.516	YCL045C
chrIII	47000	48440		47.4137	46.0218	60.7773	40.64	41.261	40.5918	56.3031	62.7917	50.887	42.8661	40.3141	43.506	YCL044C
chrIII	48555	50257		158.327	150.643	198.125	124.458	131.294	143.569	147.167	132.139	180.722	145.266	150.366	149.735	YCL043C
chrIII	50780	52520		36.3153	35.2135	58.5514	22.3634	20.6618	28.1784	99.2579	121.403	40.3562	33.2283	33.6582	35.5396	YCL040W
chrIII	52624	54948		23.4715	24.0616	28.4635	22.802	21.2137	21.0168	35.4402	38.1267	25.1025	22.32	20.9993	22.2842	YCL039W
chrIII	54813	56625		13.5275	13.0958	15.4343	14.7258	11.221	11.4197	32.2108	33.7679	11.1936	12.1422	10.1072	12.8135	YCL038C
chrIII	56743	58744	1_RiBi	136.624	140.561	92.4254	146.237	154.85	147.596	75.7239	62.0097	166.505	145.188	141.403	134.65	YCL037C
chrIII	58971	60815		50.1088	53.1487	42.439	63.5202	60.4661	55.4172	47.9008	46.9623	63.5179	57.1146	46.465	53.0533	YCL036W
chrIII	60724	61236		43.7578	44.2437	46.549	43.038	39.1246	40.2332	58.0198	83.9271	41.0785	40.237	40.191	40.5006	YCL035C
chrIII	61601	62732		30.6068	32.2032	37.9261	30.0535	26.9343	27.2313	44.0994	56.3417	37.8052	31.1532	30.1133	30.6772	YCL034W
chrIII	62698	63292		16.4067	13.5468	20.9314	16.2763	13.3547	13.0309	27.6745	30.9027	17.6487	15.3077	13.924	15.0025	YCL033C
chrIII	63363	64583		27.5157	26.3002	28.586	28.0195	25.3914	24.5168	34.3321	44.579	29.5284	24.8523	23.9102	23.8281	YCL032W
chrIII	64571	65618	1_RiBi	78.8885	77.6452	69.5371	77.3071	79.6847	78.4436	70.8062	60.3464	67.0353	78.793	70.3998	77.8281	YCL031C
chrIII	65805	68392		58.4365	59.5947	31.6515	37.8168	48.3774	52.6339	35.0016	55.0518	59.7512	58.3909	50.801	49.7539	YCL030C
chrIII	68436	69980		56.943	61.4027	38.6524	38.7299	52.5763	55.187	36.6894	42.1567	57.7434	58.6321	46.1419	48.3066	YCL029C
chrIII	70066	71441		29.1643	27.322	29.0805	28.3107	27.4418	26.6153	31.4006	47.2678	33.0372	27.9739	27.3405	27.5691	YCL028W
chrIII	73342	74020		7.72125	6.3174	7.94851	7.28938	5.53431	6.78979	9.93084	17.5265	7.77574	6.93224	6.23497	6.55646	YCL026C-B
chrIII	75940	78022		75.4802	72.7088	64.3837	41.7342	67.7407	64.1279	60.0345	56.4293	76.8093	68.9285	89.4282	61.1777	YCL025C
chrIII	79089	82340		20.9443	18.4867	21.1339	17.2775	18.8486	17.3951	21.7441	17.0862	20.8542	18.3276	21.8376	17.0555	YCL024W
chrIII	91158	92564		86.7944	82.4255	86.7535	72.6661	73.6731	78.3915	70.1402	41.1362	89.9788	85.1164	83.9134	74.6076	YCL018W
chrIII	92621	94396		31.8229	29.464	34.8861	33.1887	29.745	29.6032	44.5348	46.9444	31.6158	29.488	27.9707	29.324	YCL017C
chrIII	94528	95794		25.1995	24.6684	25.4056	28.2001	23.7887	22.5666	26.4344	37.4525	29.2167	26.7792	23.6312	23.6864	YCL016C
chrIII	96177	101266		24.3899	24.8363	26.7717	27.7062	23.3726	24.7578	30.5826	36.1967	23.3785	24.2185	24.4403	23.956	YCL014W
chrIII	101188	101871		22.3142	19.7695	28.306	22.3193	19.3219	19.8701	47.8047	41.3276	16.8845	19.7766	15.8183	18.2588	YCL012C
chrIII	104537	105580		57.9517	59.789	56.2316	56.5545	56.7486	56.1491	50.5002	58.9183	76.6462	60.7211	55.8797	58.7881	YCL009C
chrIII	105562	106863		41.7547	39.1356	37.8828	35.727	36.4813	35.4675	35.0334	44.5093	45.2236	39.2617	35.1558	37.4314	YCL008C
chrIII	106997	107521		193.709	183.253	195.994	183.912	185.035	173.158	130.08	86.7738	186.06	183.349	167.091	161.686	YCL005W-A
chrIII	107966	108929		33.8249	32.9742	31.7121	31.2284	32.8325	31.738	35.0395	33.85	33.0673	34.5816	28.8726	32.1443	YCL005W
chrIII	109026	110709		26.4385	27.6773	29.8728	24.6493	26.2564	25.2524	30.0589	31.599	24.2215	24.8564	25.8319	24.4683	YCL004W
chrIII	110548	111711		42.2779	41.0102	44.5869	39.1139	42.0488	40.3518	42.1954	35.6099	29.9717	38.1463	37.6274	40.7006	YCL002C
chrIII	111837	112530		46.654	45.4672	45.418	43.4474	49.3288	45.4956	34.7037	33.8046	37.749	44.0307	40.7303	41.2135	YCL001W
chrIII	117303	118402		42.7718	44.3652	44.9746	44.0055	42.0306	42.7018	48.7164	48.5372	34.7869	41.3646	42.4293	41.7688	YCR002C
chrIII	118597	119263		40.9298	38.7737	43.8225	39.0767	35.5587	38.8573	56.2611	40.3277	31.6215	39.1077	35.7364	37.3103	YCR003W
chrIII	119476	120559		33.0276	29.2741	40.1557	33.5482	27.4917	27.1433	47.6099	52.1525	30.3394	28.4374	29.1241	28.6258	YCR004C
chrIII	128026	130558		40.3403	39.3184	38.2614	36.0097	38.4117	37.8329	42.3467	32.8235	35.6529	37.8819	37.6245	38.1152	YCR008W
chrIII	130641	131622		47.8752	47.5387	53.9583	42.8881	43.6871	46.6412	64.067	48.3697	39.837	45.1224	47.5318	45.9936	YCR009C
chrIII	133665	137076		33.2788	31.1978	39.6772	29.2481	28.0758	29.3753	39.6323	43.4924	27.4521	28.843	31.9535	30.974	YCR011C
chrIII	137663	139163		718.095	710.505	836.984	485.597	655.433	693.36	444.635	222.669	802.48	723.299	771.274	701.779	YCR012W
chrIII	141141	142545		78.4572	74.5558	56.2103	65.6287	74.2506	76.9814	38.8476	20.2727	56.4329	77.3655	59.9625	67.4573	YCR015C
chrIII	143603	144664		43.2328	42.8037	41.2594	48.7503	48.7685	45.5938	36.3142	23.0126	38.3564	42.4484	38.6088	44.0455	YCR016W
chrIII	144569	147700		25.8481	26.1992	34.5111	26.5667	25.2954	24.9832	59.8774	50.8609	23.8662	24.852	25.3281	26.4955	YCR017C
chrIII	152688	154044		17.1313	16.4569	16.3128	18.2022	15.5942	15.0256	20.3798	23.3872	15.2722	15.8906	15.621	15.5475	YCR019W
chrIII	153934	154699		12.7662	14.1302	18.4751	13.0276	12.0859	11.7475	31.7408	32.3137	10.8613	13.402	12.8915	12.7556	YCR020C
chrIII	154665	155113		28.9655	27.8764	25.6951	26.9179	25.0998	26.8449	32.1801	35.296	22.7431	29.4375	21.3328	26.2227	YCR020C-A
chrIII	155261	156052		39.0023	35.9907	39.9648	36.7245	37.1359	37.1655	45.2049	41.579	22.6654	37.952	31.9868	36.1886	YCR020W-B
chrIII	155942	157221		16.3456	15.3312	23.3682	15.4684	15.0078	14.08	58.2868	54.7169	15.279	14.871	12.6982	15.6264	YCR021C
chrIII	158282	160472		34.0394	33.3476	38.9105	30.9124	31.9396	31.2008	59.7725	49.1896	27.6512	31.2083	33.355	30.7871	YCR023C
chrIII	160655	162240		25.2551	24.4423	24.6596	23.6801	22.2226	22.4157	34.6326	45.6935	21.3184	22.3219	22.7905	23.6556	YCR024C
chrIII	162406	163301		338.378	347.469	195.129	292.961	325.627	351.922	123.894	94.3088	264.869	344.197	280.059	318.144	YCR024C-A
chrIII	162418	163301		342.264	351.608	197.314	296.524	329.484	356.171	125.167	95.2939	268.066	348.352	283.483	321.849	YCR024C-B
chrIII	163869	166424		40.8557	40.6304	41.8796	42.1328	39.8301	40.6243	43.2999	55.6721	42.246	40.1822	38.3562	37.7743	YCR026C
chrIII	166806	168207		25.6138	23.6189	23.6932	21.5054	22.6752	20.9262	22.4955	23.3202	20.4741	22.4891	22.6398	20.7937	YCR027C
chrIII	170158	172541		27.366	28.085	30.5685	29.6476	28.1049	28.6393	48.8181	34.1685	25.9657	27.5919	26.3543	28.1504	YCR028C
chrIII	172756	173526		48.9434	45.7602	41.4956	39.1288	45.0631	45.5775	38.5086	28.2378	36.9881	42.7778	38.0297	43.4595	YCR028C-A
chrIII	173666	176536		29.2266	29.1061	33.2506	29.8086	26.7213	27.4716	40.7782	47.659	31.4966	29.372	30.4445	27.9073	YCR030C
chrIII	177397	178255	2_RPG	395.787	396.239	127.313	356.172	415.071	398.792	80.4489	58.1315	366.028	402.814	365.266	348.173	YCR031C
chrIII	179452	186155		16.0806	15.0697	15.9942	15.7343	15.1068	14.5363	21.2049	26.7139	12.5929	14.9921	14.9994	14.9767	YCR032W
chrIII	186266	190277		45.8581	47.9187	52.5068	48.7493	48.789	47.9677	45.8927	43.4708	49.7434	46.935	50.7825	46.913	YCR033W
chrIII	190565	191804		70.6146	70.5882	59.2064	64.711	70.4952	70.6721	55.9552	40.0383	64.2022	68.9559	68.1124	65.9462	YCR034W
chrIII	191639	193049		59.7139	57.0256	64.0485	60.1054	62.3644	59.2094	74.1022	59.6892	51.8381	58.5201	52.9622	58.162	YCR035C
chrIII	193244	194380		52.5545	48.511	54.8859	50.5403	42.039	45.8117	60.4451	73.6375	46.751	46.0391	42.2363	46.5548	YCR036W
chrIII	194366	197228		43.2768	44.0112	41.7521	43.628	39.9573	42.8096	46.0888	54.6383	40.7685	41.8613	40.9099	43.1558	YCR037C
chrIII	197549	199549		20.0112	20.3	19.1069	19.2882	16.7498	17.2483	20.7884	26.3167	15.6457	18.1378	16.6823	17.7509	YCR038C
chrIII	199494	200189		14.8242	16.2078	14.9997	15.5351	15.3357	14.8879	15.6358	14.3608	12.7818	15.6834	13.4749	14.6306	YCR039C
chrIII	201155	205419		33.1636	32.8808	35.4991	33.5424	32.7002	32.0806	34.5387	36.8186	29.4466	32.8007	33.4812	33.1651	YCR042C
chrIII	206093	206702		54.6135	54.6566	42.1253	55.0213	53.6335	49.1392	33.8912	28.4195	44.8927	53.669	47.9527	49.1929	YCR043C
chrIII	206778	207965		50.91	46.8632	47.1523	47.7657	49.5133	49.8999	44.8524	40.1302	47.5969	48.2363	45.4238	45.0525	YCR044C
chrIII	209803	210469		39.8071	39.9517	42.3975	37.6557	36.3731	35.9776	44.7576	37.6383	50.17	38.6309	37.2042	38.2097	YCR046C
chrIII	210570	211633		34.7332	36.7158	40.1393	41.5962	38.8235	36.6364	38.5963	36.221	43.8623	38.0941	36.1763	38.6314	YCR047C
chrIII	211877	213957		23.0185	23.5154	28.6032	23.8459	23.5376	21.5663	35.7033	51.5738	29.5322	22.9387	22.8663	22.4765	YCR048W
chrIII	214043	214873		44.6316	46.6966	52.2623	50.2478	50.2325	45.6051	44.1564	41.0657	57.4177	46.9012	42.7142	45.9297	YCR051W
chrIII	214929	216656		43.1462	40.6992	40.3235	40.6378	41.2838	39.0801	38.6998	44.4534	46.4139	40.026	40.2039	38.0373	YCR052W
chrIII	216592	218398		82.0474	81.1956	76.4138	84.182	82.9736	79.3801	66.0342	64.0284	84.4525	80.5382	79.7984	77.5449	YCR053W
chrIII	218307	220170		25.1086	26.0444	26.9375	28.1121	27.4529	24.9624	22.9959	22.4537	21.1914	24.9338	22.3684	26.5412	YCR054C
chrIII	220342	223301	1_RiBi	56.1327	58.6618	59.0629	67.1105	66.2809	62.9227	47.3178	37.871	63.5172	60.867	54.8078	60.4848	YCR057C
chrIII	223271	224248		40.308	39.8649	41.8371	41.3704	40.1429	40.5901	30.5683	28.6635	48.6145	42.2568	35.9675	37.3802	YCR059C
chrIII	224373	224858		22.2163	23.92	24.4074	24.119	26.1024	23.8335	15.5638	22.6928	29.1861	24.7312	22.2112	22.2857	YCR060W
chrIII	225504	227816		24.4178	22.8782	40.5861	21.9161	20.352	22.008	36.5387	40.2674	27.7717	22.086	22.5533	23.7864	YCR061W
chrIII	231449	233127		22.6615	20.9565	24.8039	23.1309	21.6928	21.2299	37.9414	38.6455	20.486	20.6737	21.7862	21.5492	YCR066W
chrIII	233052	236440		33.2123	32.3606	39.8368	33.4958	32.1256	30.7514	39.2806	50.0608	32.3782	31.8189	32.883	32.923	YCR067C
chrIII	238889	240108		31.1621	32.0796	40.0747	30.3311	29.0231	30.1495	43.6302	58.9029	32.4485	29.9813	30.9323	30.4914	YCR069W
chrIII	240031	240591		38.1748	40.9583	41.9005	38.1684	37.4637	34.1682	40.9592	39.1717	39.01	37.1531	35.5774	36.7598	YCR071C
chrIII	240727	242385	1_RiBi	48.3589	52.3808	53.6978	60.0009	59.827	54.2607	49.4636	60.9005	56.9483	52.8456	45.11	54.6261	YCR072C
chrIII	242519	246647		20.4625	21.3357	27.0653	25.2436	20.8566	21.4487	36.3353	41.4989	20.7571	21.3626	19.2995	21.7672	YCR073C
chrIII	246925	248024	3_MSN2	23.4901	24.108	30.8999	23.4948	21.5043	22.5132	35.4463	45.4696	30.5956	23.9573	23.7664	23.6203	YCR073W-A
chrIII	247887	248844		16.5468	16.8665	18.3693	16.6122	15.2099	15.7041	18.1375	17.8263	16.7099	15.9591	14.3958	15.3945	YCR075C
chrIII	248940	249284		19.6971	21.0249	20.9502	23.9269	19.219	20.7139	18.8494	27.1809	25.051	20.3156	19.5045	21.4503	YCR075W-A
chrIII	249017	250069		20.5788	18.4177	21.8515	21.7721	17.999	17.8955	19.8444	28.2821	24.621	19.2008	20.2734	19.3005	YCR076C
chrIII	250111	252669		42.6777	40.7673	42.6125	42.7368	42.9478	43.0609	31.5842	36.5282	46.5678	40.919	43.9463	43.2795	YCR077C
chrIII	252792	254284		33.4241	31.1404	36.4553	35.3448	30.7269	31.8009	30.0221	43.1752	40.6259	34.135	33.0237	32.3872	YCR079W
chrIII	258702	259378		54.8326	53.0355	68.6458	60.0162	50.7383	52.9175	53.4234	82.64	51.4857	52.035	48.8455	58.6527	YCR082W
chrIII	259542	260016	3_MSN2	18.2262	18.9957	24.2272	18.6105	16.9881	15.6896	33.3024	41.2117	19.1478	19.0338	15.8489	17.8159	YCR083W
chrIII	260252	262713		69.7349	69.9809	66.5757	69.5067	72.4181	70.6187	52.5594	54.3089	84.5078	70.28	77.3268	68.8109	YCR084C
chrIII	263313	263993		34.2147	34.5559	33.4771	38.2066	35.6313	34.5737	26.2442	31.4715	38.3205	34.5035	28.5991	35.2829	YCR086W
chrIII	263801	264512		50.0489	50.601	50.5109	67.3818	60.1833	54.4744	36.1679	43.0181	55.9068	56.1216	46.588	54.7753	YCR087C-A
chrIII	265021	266978		41.1323	41.6948	41.5947	39.8528	36.9489	39.5351	31.6435	40.5715	48.8904	39.4189	43.5451	38.9855	YCR088W
chrIII	267137	272267		18.1309	19.1699	21.4495	17.6033	17.9725	18.7803	23.6436	23.9741	20.0732	18.8316	18.3011	18.0448	YCR089W
chrIII	272247	272909		31.1402	32.8205	25.0218	33.6316	30.4578	33.8148	19.1498	21.749	25.0445	32.4615	28.7868	31.2686	YCR090C
chrIII	274340	276685		8.7326	8.90999	10.7075	8.66011	7.96452	8.32134	12.1146	20.5765	8.54009	8.9756	9.55478	9.37653	YCR091W
chrIII	276607	279855		22.5762	21.0637	24.6099	23.2599	20.5402	21.0737	24.2289	35.8712	19.048	20.7293	22.5228	20.7569	YCR092C
chrIII	280082	286541		64.5982	63.3049	71.4954	67.2685	63.446	65.0398	49.7654	55.6324	57.4829	62.1484	67.8878	65.7902	YCR093W
chrIII	286698	288213		21.6291	20.1563	22.0303	21.2513	20.0763	21.1408	24.1415	30.6176	16.9478	19.7532	19.7642	19.0001	YCR094W
chrIII	288109	289314		21.9222	22.6309	24.7735	22.5979	21.9348	22.1834	34.5975	40.3138	17.1684	22.1402	20.3673	21.3705	YCR095C
chrIII	293033	293713		17.5877	19.7766	17.2613	18.0387	18.0161	17.7452	19.2231	16.6389	14.6283	18.7537	15.527	16.8862	YCR096C
chrIII	293811	294340		36.1104	30.3447	28.1777	26.5286	29.1819	32.8747	35.421	30.7609	20.4898	28.4445	23.9588	28.0388	YCR097W
chrIII	297041	298811		14.6462	16.4513	13.1931	15.168	11.994	13.4981	20.0376	36.815	11.1025	13.2931	13.0091	14.3067	YCR098C
chrIII	304283	305536		7.27646	6.70631	12.8409	10.5496	6.70771	6.71655	16.994	26.8598	8.03557	7.20606	8.06859	8.49414	YCR102C
chrIV	8612	10050		8.79218	8.26571	14.1022	9.52789	6.65798	7.64209	22.3971	41.6992	8.88971	8.78585	7.45043	10.1791	YDL246C
chrIV	11541	13541		6.25202	6.19562	6.98863	7.24315	5.05093	5.49566	8.90794	16.0678	6.36039	5.954	6.50183	6.09382	YDL245C
chrIV	20520	21299		12.0027	11.8263	21.9396	16.5558	12.5097	11.9935	31.5324	25.0712	10.262	11.6577	12.8655	11.2917	YDL241W
chrIV	22650	25909		27.2651	27.6828	30.052	28.4193	26.9946	27.0166	38.1605	29.7782	23.6059	26.8635	29.1471	26.4163	YDL240W
chrIV	26371	28919		11.006	9.10593	13.2447	10.3008	10.3785	9.94058	12.8609	14.7116	8.49313	9.72586	10.5083	10.7375	YDL239C
chrIV	28951	30494		15.2197	13.7426	18.1704	14.9834	11.8116	13.3222	21.6297	32.5995	15.5942	13.869	14.9053	14.0773	YDL238C
chrIV	30608	31910		22.0348	20.5144	22.9313	20.5183	18.7589	20.6977	25.1287	33.855	20.7565	20.9031	22.4321	21.003	YDL237W
chrIV	32228	33417		45.0223	43.3128	43.1626	44.4042	46.7552	47.7402	40.4555	38.8477	48.0924	46.875	46.8923	42.0506	YDL236W
chrIV	33286	34040		46.1747	46.5558	45.8139	45.5658	46.706	47.0827	40.532	36.8899	34.9217	45.9047	41.7245	45.1452	YDL235C
chrIV	34145	36619		25.8257	26.0314	32.2343	27.6715	24.3479	23.5481	36.9088	56.4495	23.8543	24.224	23.9176	25.1688	YDL234C
chrIV	36774	38342		16.4146	15.345	19.9894	17.1816	14.2746	14.6561	28.5332	31.1059	14.8916	13.8664	14.9945	15.6339	YDL233W
chrIV	38457	38882		60.6517	59.6264	57.8014	56.3453	58.8397	61.3462	44.2923	37.3225	55.4477	63.9056	55.2136	55.8507	YDL232W
chrIV	38777	42354		36.3018	36.6263	40.6625	37.7346	35.7345	36.4991	46.2365	48.2208	38.6448	36.3709	39.683	36.8745	YDL231C
chrIV	42646	43767		13.102	12.7276	18.2924	13.2653	11.7106	11.7899	21.7796	31.8484	14.2611	12.4781	13.049	14.3212	YDL230W
chrIV	44034	46014		297.538	317.399	200.869	331.147	342.713	344.595	128.886	90.8744	380.506	331.53	345.811	321.175	YDL229W
chrIV	46311	48069		67.5777	57.9862	56.0188	43.1104	59.4445	59.1792	32.6052	21.6039	60.7164	56.9903	57.9656	22.985	YDL227C
chrIV	50861	52203		44.9521	41.2452	50.7169	43.5589	40.1967	42.3267	51.6701	53.3316	47.8009	42.4114	44.0764	41.1461	YDL226C
chrIV	52394	54244		30.3127	30.5416	35.9914	34.2205	30.9984	30.8476	52.099	60.5266	28.896	28.9689	34.0351	31.0912	YDL225W
chrIV	54154	56718		43.8598	43.1245	50.5141	48.8652	43.2835	43.1632	60.762	67.8932	43.6115	42.2065	47.0791	45.6192	YDL224C
chrIV	57135	60489	3_MSN2	13.7982	13.5901	17.5618	15.8548	12.6739	12.6456	19.9973	38.3039	15.1128	13.4433	13.3713	15.4094	YDL223C
chrIV	60647	61908		8.65852	7.90167	11.0969	7.63624	6.98792	7.02692	16.643	39.4802	8.34829	7.58302	7.60588	11.0581	YDL222C
chrIV	62097	65037		15.4771	15.1911	19.6649	16.3052	14.6917	14.7216	21.2937	26.3666	17.8831	15.6029	16.1087	15.1345	YDL220C
chrIV	65187	65826		27.6103	26.281	28.7193	26.0597	26.3661	26.0704	29.1754	26.0766	19.5808	25.689	24.1487	24.5984	YDL219W
chrIV	66486	67491		9.91112	10.0477	21.6635	11.5246	8.86413	9.69671	34.6438	37.4274	11.0333	9.0786	8.45649	11.6039	YDL218W
chrIV	67587	68777		30.4175	30.5061	33.7645	34.0132	30.7506	31.3355	29.4728	29.5948	32.156	30.9456	31.6801	32.8003	YDL217C
chrIV	68679	70328		20.0956	19.7984	19.8169	21.4161	19.0118	19.8277	17.7335	20.7731	17.6268	21.0788	19.949	18.2743	YDL216C
chrIV	70486	73918		35.4593	36.6556	39.9516	37.3796	34.6335	36.0727	36.4635	42.5633	33.6965	35.7219	36.9352	36.8652	YDL215C
chrIV	74404	76650		8.51626	8.47812	18.0019	8.52833	7.37033	7.47211	24.4425	17.844	7.82986	9.02444	7.90691	9.71644	YDL214C
chrIV	77165	78005	1_RiBi	38.4954	45.5147	45.9325	56.5953	49.7586	44.1105	30.7754	26.0086	48.7854	48.0529	40.5654	47.7173	YDL213C
chrIV	78359	79203		45.1202	45.4547	48.4882	46.7807	45.0619	47.6307	29.4429	29.1094	43.3148	46.9489	47.2618	48.8342	YDL212W
chrIV	79226	80490		28.988	31.0894	31.1909	29.2787	30.1145	29.086	21.2913	21.9617	30.1996	28.8477	32.9991	28.0641	YDL211C
chrIV	86074	87267		28.3626	28.1573	29.2559	32.9835	29.7619	30.8074	22.6914	28.6673	29.1464	29.8662	27.6945	28.8572	YDL209C
chrIV	87467	88076	1_RiBi	123.136	139.264	111.221	146.534	147.439	141.92	70.589	58.3718	145.52	142.673	127.486	141.192	YDL208W
chrIV	88209	89939		30.2956	31.4479	33.3814	34.5798	33.4499	32.8201	27.4967	28.179	33.5969	30.5662	33.82	31.4491	YDL207W
chrIV	90026	92480		11.5746	10.6956	14.4897	11.9169	10.2959	10.2828	19.2544	17.7209	8.07231	10.6217	11.2895	11.6198	YDL206W
chrIV	92466	93928		36.5263	38.328	38.8164	37.8472	39.817	37.769	24.5198	23.9576	41.8252	39.2037	41.7216	39.3182	YDL205C
chrIV	94591	95788	3_MSN2	16.9073	17.4162	25.8922	18.2838	16.6419	16.073	30.0914	58.9876	20.249	17.3933	18.8836	20.5946	YDL204W
chrIV	96045	98151		23.352	24.4451	28.0233	25.7545	24.4138	24.7752	23.6638	31.2676	25.1819	24.2856	26.0048	25.205	YDL203C
chrIV	98412	99320		43.8833	44.0593	40.8843	45.1389	45.5731	46.4355	32.1027	36.5068	47.9955	45.3786	44.03	46.3089	YDL202W
chrIV	99457	100506	1_RiBi	39.5949	41.2879	45.1364	45.0553	42.3668	42.6425	40.4766	39.1814	39.9706	41.4114	39.7908	40.2342	YDL201W
chrIV	100430	101102		23.8461	20.4191	24.0328	22.4999	21.5773	19.5893	24.8905	25.7657	20.1546	20.5895	20.0242	21.8029	YDL200C
chrIV	101237	103378		9.67365	8.43611	11.478	9.73377	8.14932	8.06337	17.1433	21.0374	8.23156	8.16188	8.4337	8.70156	YDL199C
chrIV	103525	104667		40.2166	39.9499	39.6304	29.9566	38.7456	38.7931	26.7753	29.9351	43.085	39.7683	42.7803	39.9871	YDL198C
chrIV	104753	106872		30.9539	30.1612	39.5896	30.9187	29.1702	28.7392	27.7938	35.2041	35.4344	30.7305	32.7391	30.5376	YDL197C
chrIV	107078	111173		55.3864	52.8382	68.2331	53.146	55.2268	55.4895	44.5963	45.7596	63.7053	54.6114	62.3108	55.8473	YDL195W
chrIV	111371	114402		6.93858	7.24312	9.64159	8.91035	6.83866	7.28148	10.7237	20.6915	6.98745	7.18968	7.90159	7.5419	YDL194W
chrIV	114555	116020		40.756	36.9674	44.8734	37.7806	37.9467	37.4179	42.1661	45.4507	34.8927	38.8389	38.5537	36.9155	YDL193W
chrIV	116277	117141		130.742	130.951	108.541	125.47	137.256	138.127	72.3515	62.4027	127.097	131.631	131.833	125.801	YDL192W
chrIV	117604	118618	2_RPG	259.65	267.053	83.3374	263.888	293.96	290.545	77.3733	58.8124	257.802	274.571	275.168	251.845	YDL191W
chrIV	118562	121786		31.1121	29.2149	27.3921	29.2733	30.9493	32.2589	29.3563	41.2735	28.3083	29.9629	30.875	31.3765	YDL190C
chrIV	121948	123684		32.3663	33.1558	33.8468	34.3932	32.7998	32.7984	28.639	33.3499	31.9662	31.8148	32.4276	31.8493	YDL189W
chrIV	123780	125179		27.7506	27.2143	32.1482	27.6525	25.4767	27.4177	33.5183	34.488	29.4215	27.281	30.7909	28.1319	YDL188C
chrIV	125499	126504		25.4826	28.531	34.7268	30.4214	31.6554	30.6599	35.089	36.7095	31.1373	28.8956	28.6415	26.6906	YDL186W
chrIV	126669	130132		67.1889	68.0183	65.8941	70.6195	72.7431	71.7209	59.7675	73.1231	75.3867	67.7807	77.5065	70.649	YDL185W
chrIV	130195	130563	2_RPG	640.343	609.918	360.567	553.087	669.431	678.441	268.512	116.699	577.633	634.179	512.735	576.482	YDL184C
chrIV	130813	131912		15.0836	12.8575	14.5758	14.2174	13.9913	13.2506	34.4134	47.1601	11.8329	13.449	11.7333	13.6323	YDL183C
chrIV	133390	134816		88.4966	92.2364	89.1491	76.4183	90.9619	91.5378	93.8946	97.5918	100.909	92.7394	93.1107	89.1536	YDL182W
chrIV	135015	135556		61.6018	56.0006	71.7859	39.5119	45.986	55.8148	76.5973	62.9211	65.2532	58.7728	64.9161	64.0493	YDL181W
chrIV	135763	137656		30.609	28.3009	38.9475	26.7422	28.8455	28.549	58.8497	53.3	26.076	28.5957	33.4937	31.4358	YDL180W
chrIV	138179	139287		67.9244	64.4388	59.6799	55.6617	65.8748	69.8927	46.9976	40.8347	60.9163	67.5063	67.7776	67.918	YDL179W
chrIV	139496	141188		26.2266	27.5606	30.7871	31.1606	27.4656	26.8638	47.1771	52.5181	26.9324	26.6387	26.9802	27.6161	YDL178W
chrIV	141110	141815		24.2335	24.7808	24.1024	25.1636	24.1051	23.3658	27.593	39.4992	23.9387	21.8214	23.037	21.9423	YDL177C
chrIV	141956	144334		20.2002	20.4514	21.3728	20.9617	22.4888	21.1598	30.6087	36.4243	16.9934	19.7117	20.502	19.9405	YDL176W
chrIV	144305	145550		35.8051	33.7456	40.5265	35.1404	35.1736	35.0525	55.7628	46.9156	33.2525	33.7764	34.5245	34.7182	YDL175C
chrIV	145732	147690		36.1677	35.5956	43.1729	36.2596	34.0399	37.5103	58.3469	80.581	44.9412	37.17	38.7922	37.1844	YDL174C
chrIV	148147	149114		39.9336	38.5079	43.0519	38.9063	38.5451	37.5783	44.6632	66.9589	47.6966	40.1037	40.6879	40.5453	YDL173W
chrIV	149081	155928		47.8874	49.8635	47.0571	53.3447	51.2446	51.3118	36.709	46.7948	52.1395	50.4775	55.2362	47.9355	YDL171C
chrIV	156289	158071		15.5265	14.9057	15.609	17.8958	15.1626	14.6111	19.8341	29.0406	14.4381	15.7233	16.1339	14.9405	YDL170W
chrIV	157956	158775		4.30537	3.54768	5.13368	4.10702	2.77654	3.24084	10.0969	27.0709	3.96166	4.1298	3.25632	4.42096	YDL169C
chrIV	159503	160818		28.1193	25.5147	42.6943	33.345	24.4639	26.3893	54.0001	70.4488	29.821	25.8447	27.7121	30.9434	YDL168W
chrIV	160821	163212		42.9958	44.8888	45.4704	54.4734	49.1925	48.4977	44.2926	38.2273	42.0685	46.0397	44.6663	47.1718	YDL167C
chrIV	163370	164115		39.5508	47.0238	44.5329	52.0634	47.6468	47.1849	38.2628	33.9166	44.1606	46.677	41.0383	44.2219	YDL166C
chrIV	164240	164901		35.7626	39.3571	37.161	37.0639	37.69	35.0869	36.202	34.746	37.1687	37.4654	36.6045	34.5294	YDL165W
chrIV	164836	167266		29.127	29.2547	30.0402	28.8591	29.7917	26.9438	35.672	36.9729	31.9908	28.1314	31.6837	28.0957	YDL164C
chrIV	167697	169201		58.7565	59.7097	77.75	63.4485	59.2763	59.199	82.6162	70.6404	65.8828	58.7512	69.5147	64.4211	YDL161W
chrIV	169167	169635		27.8671	28.3704	26.4112	28.7357	28.7351	28.6416	27.7913	25.1547	22.8601	29.4312	24.8921	25.5398	YDL160C-A
chrIV	169787	172217		47.3467	47.1577	55.8788	48.3848	48.2756	49.3881	58.0104	67.4073	44.0282	47.453	52.6252	49.5952	YDL160C
chrIV	172434	174152		25.101	23.2907	29.1294	26.4161	23.2428	23.5683	44.9283	53.2204	21.4188	23.4047	23.0229	24.0908	YDL159W
chrIV	174048	174657		28.0866	25.3697	31.0707	30.1348	26.7358	28.1503	31.463	32.7695	24.8955	29.2829	26.3652	26.3666	YDL157C
chrIV	174822	176563		29.2355	27.6569	31.4072	29.3146	26.8731	26.0425	26.1678	34.9968	32.7723	27.8316	29.4983	26.3013	YDL156W
chrIV	176632	178186		41.3603	42.5046	43.9849	46.0908	44.5577	43.9461	35.8631	32.6556	45.5529	44.4175	47.6039	41.8006	YDL155W
chrIV	178300	181117		15.3222	15.5348	23.8768	13.8375	15.1522	14.9219	32.4863	23.8653	13.1552	14.6446	16.1117	15.8066	YDL154W
chrIV	181135	183058	1_RiBi	37.9981	42.9867	43.4061	56.7873	50.4914	47.1132	40.882	34.0673	44.427	45.9487	41.4438	48.1975	YDL153C
chrIV	183231	184708	1_RiBi	33.4251	38.017	35.8199	44.747	41.7568	40.4841	35.8731	34.1951	43.3971	41.5282	39.9054	40.5625	YDL150W
chrIV	184901	188062		10.0297	9.00274	15.2554	9.47088	10.006	9.48317	37.8985	32.8084	8.0647	9.00178	10.1307	10.9013	YDL149W
chrIV	187933	190652	1_RiBi	38.3702	39.465	43.7951	55.9029	46.8967	44.4992	45.3893	45.0378	37.4243	41.4493	40.6161	44.3344	YDL148C
chrIV	190864	192408		83.7643	77.3064	124.005	89.3843	81.5781	84.2777	133.5	166.102	77.5774	79.0804	86.5271	91.1421	YDL147W
chrIV	192593	194351		17.1369	15.2044	19.6698	14.8222	14.2487	14.3744	45.5482	35.7044	12.2136	14.745	16.2292	16.3027	YDL146W
chrIV	194407	198459		46.0947	48.2143	49.4199	51.041	50.1277	48.8857	37.8277	41.3834	51.0155	48.5261	54.6742	47.9289	YDL145C
chrIV	198569	199782		35.224	34.3706	43.7031	36.1395	35.0163	34.7719	34.0633	57.0208	44.5453	37.0543	36.9158	33.3867	YDL144C
chrIV	199955	201682		67.0226	70.2612	83.3924	79.0957	72.7202	72.1939	71.5986	78.3041	78.2366	71.2176	73.8091	76.8788	YDL143W
chrIV	201574	202634		25.0026	24.3687	27.0131	24.1004	23.8055	22.9533	27.0998	31.3433	20.9689	21.5057	23.5737	23.3148	YDL142C
chrIV	202799	205375		23.4835	22.0278	23.5815	23.0701	20.7225	21.9357	22.517	34.1949	22.6226	22.8136	22.7706	21.3451	YDL141W
chrIV	205255	211103		77.7994	76.4141	80.4293	86.3677	81.1871	80.9888	48.4578	58.3304	85.417	79.4289	90.8867	84.2474	YDL140C
chrIV	211271	212088		15.9287	17.0993	16.3565	17.8966	16.2971	16.2874	16.7584	33.5866	16.8301	15.9548	16.5488	15.6324	YDL139C
chrIV	213067	215788		33.2572	33.2239	29.6282	32.0406	32.1737	32.9455	30.1939	43.8275	35.9158	33.9816	34.1918	31.5501	YDL138W
chrIV	215998	217228		113.455	115.793	71.6292	103.417	114.093	120.377	61.3552	65.2541	117.215	114.246	111.242	105.565	YDL137W
chrIV	217566	218448	2_RPG	234.349	234.577	79.5494	235.07	262.159	256.201	63.783	55.6477	227.969	243.529	252.431	230.55	YDL136W
chrIV	218425	219332		61.1952	57.2794	36.3254	52.9285	58.1244	56.5528	35.8667	35.7359	51.0507	56.7202	56.4649	54.5834	YDL135C
chrIV	219594	221307		47.9939	45.9526	39.7657	46.0839	45.3937	45.4804	36.3335	38.6076	44.8248	45.0314	46.7538	43.257	YDL134C
chrIV	221521	221818	2_RPG	466.562	473.209	147.965	413.836	467.863	513.905	71.1852	46.7494	461.709	493.627	370.523	432.802	YDL133C-A
chrIV	222270	223837		38.2105	39.0944	30.7833	40.7978	39.0635	37.6615	25.6163	36.0122	36.8972	36.6099	39.4947	37.9705	YDL133W
chrIV	223989	226941		28.6732	27.9717	39.8089	27.7158	26.6325	28.3305	40.2261	59.4014	25.1546	26.9905	30.065	31.4558	YDL132W
chrIV	227283	228819		70.0851	75.3548	61.5855	62.7887	71.4573	73.7331	61.202	73.0067	75.3804	71.8471	75.255	70.7305	YDL131W
chrIV	229090	229595		17.9614	17.4493	18.0002	12.2088	12.3733	14.5709	28.9521	55.9487	12.7729	15.4293	15.1874	17.04	YDL130W-A
chrIV	229789	230622	2_RPG	374.021	383.488	93.9253	372.178	413.609	405.057	54.6659	51.15	397.421	405.179	377.232	349.917	YDL130W
chrIV	230874	231978		30.6784	33.8105	31.1678	35.96	33.7742	34.4001	36.6055	42.566	37.7865	35.9599	34.3704	37.2532	YDL129W
chrIV	232535	234056		57.9911	54.4277	56.8622	49.4563	56.4421	56.3865	56.1899	50.5245	64.461	57.0295	59.004	57.2725	YDL128W
chrIV	234855	236025		54.879	54.0064	48.0126	51.3338	53.5587	54.5105	51.4164	52.1719	50.8448	53.1847	56.9318	52.3844	YDL127W
chrIV	236084	238743		94.4078	87.5795	147.2	94.1388	86.2224	87.3653	96.0936	128.602	103.073	87.4439	103.004	101.963	YDL126C
chrIV	238881	239815		101.263	99.4907	124.059	70.4106	84.2046	89.3582	81.3889	103.645	95.8593	86.373	82.9704	85.8675	YDL125C
chrIV	240191	241270		73.4504	64.9865	96.2929	48.9391	56.9298	58.7583	62.5346	95.7817	67.7912	58.321	65.8481	61.4301	YDL124W
chrIV	241355	242323	3_MSN2	39.6058	39.2244	56.4981	36.146	35.2882	38.1889	53.6111	61.257	39.9639	37.2696	37.0044	41.5793	YDL123W
chrIV	242310	245069		48.3256	50.692	56.199	54.6195	54.0419	51.6158	61.962	59.6546	47.6022	50.5535	52.4618	53.0291	YDL122W
chrIV	244930	245626		36.4888	41.8982	40.2437	42.3062	41.6671	42.1995	42.4132	33.7942	35.166	42.4677	36.7589	43.6535	YDL121C
chrIV	245826	246603		42.4157	40.3452	40.4339	40.8519	36.4001	40.5824	40.8087	46.0701	40.9519	39.4356	37.9367	39.1132	YDL120W
chrIV	246534	247783		22.5833	21.7341	21.4225	20.848	18.844	20.4307	27.6974	34.245	19.1776	19.5683	19.7841	21.9022	YDL119C
chrIV	248169	251374		46.5283	41.8516	40.8358	35.6814	44.0571	44.9264	28.8258	40.0883	41.5108	43.5299	44.8434	44.2382	YDL117W
chrIV	251498	253803		40.0453	40.4896	41.0366	42.7581	42.1505	41.372	40.3468	38.5455	36.6356	40.9172	43.3745	39.9318	YDL116W
chrIV	253888	255174		29.8202	26.996	44.9424	30.4634	27.6414	27.1038	60.5517	57.6854	26.8471	28.4597	30.5026	32.3138	YDL115C
chrIV	256518	258640		17.8637	18.1059	23.1887	19.5923	17.1793	17.7847	30.017	44.6707	17.3067	16.6318	20.0639	18.4388	YDL113C
chrIV	258834	263245		24.977	27.4285	34.1825	30.4471	27.5691	27.0201	50.4918	40.8333	23.3915	26.5212	25.401	27.7163	YDL112W
chrIV	263306	264178		52.1634	54.6317	59.1102	61.4349	60.258	55.1169	53.8433	57.2673	54.2779	55.5535	52.2911	56.2335	YDL111C
chrIV	264322	265020		36.1622	33.7428	45.0128	34.2445	30.5207	34.1547	48.0933	67.2147	38.2852	33.7539	34.7003	38.114	YDL110C
chrIV	265106	267542		18.3852	18.8094	21.7013	21.4147	19.2097	18.6832	30.477	33.5887	18.7563	18.8315	19.1062	18.8531	YDL109C
chrIV	267674	268785		25.0582	27.3522	29.5848	30.1533	26.4596	28.1703	38.1105	40.4694	25.966	26.5931	26.775	26.6847	YDL108W
chrIV	268887	270130		25.7233	24.9159	25.4717	24.5061	22.9415	23.5364	32.1679	30.4265	19.4079	23.8482	23.6022	22.8937	YDL107W
chrIV	270221	271964		33.5361	32.5217	35.2109	36.2585	32.2724	32.4604	40.4548	52.2923	29.404	32.527	34.5863	31.3183	YDL106C
chrIV	272353	273644		27.7967	27.6863	28.3573	28.8965	26.9304	25.9124	34.2002	30.6942	25.7228	26.9927	27.9745	25.8807	YDL105W
chrIV	273608	274894		23.9434	23.9821	26.0528	24.5174	21.975	23.1349	36.2335	30.0742	21.6662	22.5304	24.0467	24.8817	YDL104C
chrIV	275030	276653		22.5798	20.4208	23.6527	21.6592	20.8213	20.1197	27.4861	31.7393	23.1404	20.2452	21.3574	20.0051	YDL103C
chrIV	276777	280378		20.3583	19.7762	21.4029	22.4445	18.8678	18.1332	29.5516	29.8686	17.705	18.1937	19.6842	18.9991	YDL102W
chrIV	280141	281908		25.3746	24.4612	28.8944	26.668	22.5714	22.3144	37.7706	36.347	21.9038	23.8724	25.3054	23.9501	YDL101C
chrIV	282029	283211		66.3969	63.762	82.0764	64.3806	59.9262	63.3857	72.878	97.5851	64.4133	64.147	63.674	67.3757	YDL100C
chrIV	283302	284523		37.435	36.709	45.8073	38.6607	37.0021	35.8311	42.8055	63.0499	34.6498	35.0882	37.3841	39.7737	YDL099W
chrIV	284441	285174		22.0545	21.4083	24.2512	22.6522	21.456	22.1621	27.0927	31.2753	20.1124	20.8953	22.141	23.1856	YDL098C
chrIV	285305	286752		80.1257	76.9883	111.834	79.7344	72.6742	75.9552	91.5875	101.168	83.7907	75.9283	80.2029	82.3393	YDL097C
chrIV	286978	289591		63.0889	64.7649	65.1973	59.8765	64.5886	65.5766	55.4039	62.4883	76.8792	65.2258	69.3235	63.1329	YDL095W
chrIV	289860	292412		17.8954	17.8437	24.4724	17.9391	17.5947	17.4919	27.2917	29.5226	15.8286	17.38	18.2776	16.5886	YDL093W
chrIV	292748	293359		55.4957	56.0995	53.4331	55.4291	53.0741	56.4831	42.8561	42.9997	50.7468	54.9182	52.5774	49.6388	YDL092W
chrIV	293297	294852		19.2092	17.8861	25.4787	19.6758	18.3464	17.9632	40.557	45.4511	16.4191	17.4755	18.8374	19.0662	YDL091C
chrIV	294986	296362		20.0666	19.2976	23.8013	21.2545	18.3587	18.5924	34.4974	42.5667	19.7934	18.2713	19.1331	20.2818	YDL090C
chrIV	296520	298342		15.3186	16.1204	18.1664	15.5052	14.5287	14.6374	23.7501	35.9509	11.9976	14.3962	14.892	15.1499	YDL089W
chrIV	298262	300141		45.3311	46.6109	50.6438	48.5081	46.6492	47.1499	56.2539	56.6421	42.2949	44.7922	48.1613	46.8985	YDL088C
chrIV	301373	302295		49.2943	52.6895	54.1952	54.7723	50.3805	51.1027	57.2558	63.7654	62.2376	51.6319	53.8065	51.077	YDL086W
chrIV	302416	302748		26.6856	24.2006	28.0682	26.056	25.6848	24.1608	64.4404	55.812	25.7516	25.8549	24.9625	28.9197	YDL085C-A
chrIV	303184	304873		16.9947	17.6503	22.4877	17.3207	15.0449	15.8393	37.3354	42.1279	18.4554	17.3772	18.2163	17.7819	YDL085W
chrIV	305052	306688		81.6573	82.4649	80.7411	83.0661	80.4974	84.9127	88.4291	74.0946	76.6784	82.3514	86.7989	78.2799	YDL084W
chrIV	306804	307871	2_RPG	281.64	291.661	59.0657	282.961	313.109	306.327	41.6858	36.9638	292.749	301.951	289.799	262.355	YDL083C
chrIV	308385	309526	2_RPG	228.844	232.739	69.1184	228.094	251.691	241.263	56.2325	48.2796	249.94	240.752	240.706	219.502	YDL082W
chrIV	309692	310234	2_RPG	270.161	284.054	109.671	264.908	287.084	293.573	80.8264	48.6904	315.633	300.21	268.297	264.691	YDL081C
chrIV	310490	312665		36.0892	36.6081	31.5683	34.1941	34.4252	36.3274	39.2136	38.8505	36.1576	37.6996	35.0694	35.322	YDL080C
chrIV	312830	314766	3_MSN2	13.8669	14.723	17.3884	13.6906	13.3021	13.4533	31.4234	30.5911	13.8044	14.9828	13.8799	15.4394	YDL079C
chrIV	315272	316459		25.6798	23.1526	26.6045	22.781	22.0115	23.2583	39.4325	41.7724	28.2112	25.5949	25.3616	24.2811	YDL078C
chrIV	316868	320253		14.3037	13.4961	11.3744	13.7299	13.4018	13.4751	14.3801	21.526	11.2469	13.4934	13.5601	13.2463	YDL077C
chrIV	320461	321698		26.8096	25.9054	21.9533	24.0821	25.0403	24.6262	30.706	36.7951	23.3237	25.3284	24.4555	24.1589	YDL076C
chrIV	322194	323058	2_RPG	325.615	315.016	75.0696	296.865	356.456	337.194	52.1057	33.5627	298	321.36	309.086	294.16	YDL075W
chrIV	323952	326232		55.4859	54.2793	53.0178	53.6524	54.4468	53.9784	54.4111	47.8957	49.4015	52.8458	55.5696	52.7615	YDL074C
chrIV	326426	329623		22.39	21.8849	23.1063	23.2852	22.4188	22.0298	23.7266	30.4236	18.1127	20.7932	21.1832	21.5127	YDL073W
chrIV	329759	330517		68.841	64.9472	89.2877	59.0443	58.9506	59.9198	88.2288	96.5658	63.6831	62.4625	58.0229	64.3716	YDL072C
chrIV	330991	333099		120.514	123.622	149.169	121.494	122.483	130.861	99.9016	102.975	119.268	124.444	127.179	137.452	YDL070W
chrIV	333981	334453		67.5068	62.8715	63.4499	55.5242	61.3597	65.6156	54.0141	53.6116	67.7321	62.5088	56.8725	64.4249	YDL067C
chrIV	334799	336264		42.2167	41.6845	49.7068	40.6717	37.3299	38.1199	56.0247	73.1685	46.704	40.2289	45.6984	39.6811	YDL066W
chrIV	336165	337317		40.2459	37.0551	44.7382	39.2341	39.4927	36.8107	56.4756	53.9353	36.7885	36.9606	37.6467	36.0595	YDL065C
chrIV	337443	338191		36.472	34.5232	42.3686	35.987	37.429	34.2503	50.0396	44.2151	33.5377	36.8609	34.3604	34.9649	YDL064W
chrIV	338114	340234		44.4683	47.9004	44.5433	58.5415	55.8201	52.165	44.3791	36.505	40.5394	47.8127	40.8408	49.2154	YDL063C
chrIV	340459	341219	2_RPG	264.216	263.403	79.868	240.201	283.665	274.054	63.1089	65.8305	259.092	267.299	247.671	240.023	YDL061C
chrIV	341598	344105	1_RiBi	45.4389	50.1613	42.1114	56.9692	54.2023	51.1562	43.218	38.0076	50.1923	49.1898	45.8767	48.9357	YDL060W
chrIV	343976	345065		18.4282	16.4116	16.2061	16.1945	16.1372	15.1487	20.471	26.17	17.255	16.8143	15.6376	15.2336	YDL059C
chrIV	345609	351182		24.0246	23.4776	25.4872	24.9086	23.6406	23.5858	25.5615	28.2749	21.9882	23.3378	24.1662	23.1837	YDL058W
chrIV	351398	352462		16.1484	16.7353	16.5414	18.1505	17.086	15.2812	20.5831	34.2623	17.3178	16.6308	17.2457	16.579	YDL057W
chrIV	352761	355470		36.0546	34.3436	36.7465	34.8176	35.6733	35.5328	45.1669	54.4947	32.2532	34.6442	35.1659	34.8178	YDL056W
chrIV	355430	356907		385.184	363.594	326.541	305.5	391.371	381.523	301.908	165.178	400.449	361.959	383.415	332.069	YDL055C
chrIV	359736	361373		14.1445	14.2933	19.0941	14.9486	12.5058	12.1595	33.3073	46.3326	14.382	14.0987	12.7427	13.8315	YDL054C
chrIV	361509	362365		38.0012	36.0083	38.2664	37.2103	35.8042	34.5582	63.4707	54.4507	35.2953	35.7694	34.0121	35.7027	YDL053C
chrIV	362614	363634		65.504	63.7567	73.9431	61.5863	62.2998	62.0751	90.4797	93.965	69.3229	64.1819	60.3024	61.7805	YDL052C
chrIV	363902	364882		89.6854	93.5797	79.6541	97.8852	104.429	98.4826	100.459	76.2249	93.0941	100.709	81.7629	94.3535	YDL051W
chrIV	364978	366002		28.4169	28.1667	37.0028	24.1565	28.75	26.7103	81.1642	46.4091	24.4262	26.9746	23.8646	28.8275	YDL049C
chrIV	366622	368319	1_RiBi	22.0513	22.7706	27.8661	20.711	17.9867	21.5227	54.1347	61.2103	21.4671	21.8266	20.5523	23.2065	YDL048C
chrIV	369526	371010		52.2864	54.0906	53.537	49.2109	53.6638	52.4144	72.8448	66.9043	58.7349	54.5213	53.2944	52.0754	YDL047W
chrIV	371144	372039		69.7848	70.4149	85.9214	68.2977	62.1912	67.8151	116.397	131.035	71.719	67.3255	66.5204	66.4489	YDL046W
chrIV	372198	372654		51.1891	56.8856	49.5737	52.1385	47.9978	50.78	63.168	62.1174	47.6979	54.1452	46.2611	51.8594	YDL045W-A
chrIV	372628	373772		24.7829	24.5289	26.0374	24.7805	21.1554	22.9849	41.7085	39.7455	23.3401	22.2935	23.2332	22.5738	YDL045C
chrIV	373885	375313		27.4738	25.7508	29.209	26.3769	25.7709	24.862	40.5506	36.0793	24.7843	27.0703	26.6774	26.3353	YDL044C
chrIV	376594	378504		24.8684	24.7872	14.8438	17.6057	26.0185	24.7473	13.6766	14.4231	29.7427	27.6084	26.9285	23.8287	YDL042C
chrIV	378761	381496		33.8531	32.9742	32.7894	32.0968	32.0935	32.0318	38.0672	34.6243	31.7254	33.2385	35.0524	32.174	YDL040C
chrIV	387374	388908		37.0174	38.9762	45.7855	39.1556	41.2394	36.4234	58.2248	37.3507	35.14	38.1289	34.5016	38.3499	YDL036C
chrIV	389038	392339		32.5781	31.2905	34.5415	33.2191	31.3037	30.9368	39.8799	44.3837	28.5209	30.8493	33.2675	30.6584	YDL035C
chrIV	392477	393957		55.1236	49.8767	65.5248	52.5705	52.3339	50.4783	73.3518	97.7654	59.1836	51.9912	50.8125	50.429	YDL033C
chrIV	394154	397292	1_RiBi	35.035	37.6728	40.4868	46.8037	41.7949	39.1142	42.9845	37.1043	38.2419	38.3113	34.7618	38.523	YDL031W
chrIV	397456	399218		25.1654	24.3747	25.9066	24.6257	23.382	23.3861	28.7243	30.7874	21.1965	22.3021	20.8986	23.2549	YDL030W
chrIV	399305	400766		47.4907	45.2206	52.1517	45.7797	41.363	43.7852	57.8686	64.909	46.7558	45.2148	47.6169	45.8939	YDL029W
chrIV	400850	403465		29.3907	28.5959	31.5165	29.4478	29.265	27.1953	42.0735	37.1853	25.6342	27.9406	29.2313	29.0196	YDL028C
chrIV	403528	405001		16.9374	14.959	18.3973	13.6121	13.6051	15.4862	25.5989	26.3899	13.1647	15.3184	15.5011	16.8115	YDL027C
chrIV	405144	407414		21.8099	20.9977	27.395	19.4838	17.6877	19.4981	35.0771	40.4179	20.3617	19.1429	19.6095	19.7563	YDL025C
chrIV	411749	413133		62.9265	61.0765	102.801	44.0096	45.5716	52.4392	164.372	189.818	67.4513	57.556	58.2953	74.6365	YDL022W
chrIV	413927	414952		18.1076	16.1356	17.9365	16.4511	13.268	14.5687	25.2169	20.4658	12.6145	15.358	12.6136	16.1403	YDL021W
chrIV	414965	416959		140.022	122.243	306.989	107.835	111.38	117.683	455.747	334.076	117.987	114.752	127.888	156.659	YDL020C
chrIV	417522	421725		23.3005	21.9633	32.1629	23.2426	20.046	21.7143	36.8663	34.7277	23.761	22.5924	23.7593	25.2975	YDL019C
chrIV	422644	423581		30.7402	29.3615	29.0703	27.9304	29.126	26.9312	27.3542	29.766	26.9327	28.631	28.0187	26.9	YDL018C
chrIV	424098	425795		22.0429	20.5857	21.9758	22.246	20.6451	18.9661	25.1014	31.9279	20.3199	19.1498	20.2745	19.244	YDL017W
chrIV	425775	426985		56.0527	56.2087	58.1487	55.8365	56.7035	54.1228	50.4225	60.8283	45.4059	54.3228	53.0723	56.0168	YDL015C
chrIV	427213	428562	1_RiBi	146.396	140.888	125.42	160.405	164.215	155.971	72.5115	73.4246	161.095	153.623	144.032	155.058	YDL014W
chrIV	428928	431034		32.9409	31.6439	31.2789	34.6698	31.8726	29.8074	44.328	49.4249	35.064	31.7726	32.8909	31.48	YDL013W
chrIV	430954	431539		64.5128	60.9255	67.4246	60.9455	59.6377	60.1699	78.2021	74.6708	66.1214	60.3628	61.7971	60.256	YDL012C
chrIV	432284	433303		34.8648	32.0069	32.8859	29.9594	29.7747	29.1948	35.7746	39.0835	29.0824	30.1592	32.1236	29.2142	YDL010W
chrIV	433465	434134		78.878	79.4687	74.2915	79.7185	78.1186	83.4908	64.7993	51.6681	79.3302	83.7672	72.4996	83.0259	YDL008W
chrIV	437998	439443		70.1148	64.6312	105.274	68.7374	64.2985	64.6601	102.929	101.514	64.3261	62.4976	65.8404	75.9045	YDL007W
chrIV	439586	440870		39.6172	35.9715	44.5328	34.8928	35.4816	35.2051	61.2721	44.1068	29.2578	35.987	35.3053	35.8588	YDL006W
chrIV	440782	442369		34.8318	35.0943	39.2385	36.8772	34.0552	33.5364	45.3205	42.2828	32.2789	33.4768	33.7361	34.9652	YDL005C
chrIV	442956	443710	3_MSN2	69.6399	67.1803	70.2831	57.0501	62.2035	66.0844	66.5132	56.9665	68.1267	65.4918	72.6711	64.3595	YDL004W
chrIV	444557	446500		79.4989	71.6022	75.2624	62.3537	74.2852	69.541	87.4798	77.953	69.8363	69.3863	77.3621	63.9763	YDL003W
chrIV	446679	447684		38.3068	36.5272	37.6714	37.621	38.2356	38.4173	47.5735	33.5647	36.7167	36.6233	36.1092	38.0908	YDL002C
chrIV	447902	449393		30.0713	29.0012	28.133	26.7119	30.6434	29.5971	37.8084	29.4083	26.9149	27.9713	27.4524	28.6464	YDL001W
chrIV	450106	452742		28.7064	28.6846	38.3738	29.2745	24.9677	26.9593	60.9104	122.34	29.9298	28.0498	31.3741	35.9595	YDR001C
chrIV	452963	453835		86.4805	88.5263	84.4593	91.7625	97.5908	94.5098	71.1783	66.824	96.495	89.2284	80.8228	90.3481	YDR002W
chrIV	454075	454819		50.4012	42.022	66.751	44.5108	36.9057	38.3922	65.7924	65.4339	45.5855	40.3498	40.8118	44.3564	YDR003W
chrIV	455200	456811		41.4332	37.8931	46.0096	37.758	36.8233	37.3692	58.219	52.6534	36.3773	38.0408	35.8102	36.2631	YDR004W
chrIV	456666	458303		41.6735	36.8967	37.569	33.6994	34.9352	34.3426	36.8218	30.8236	33.2243	36.622	34.9796	35.5053	YDR005C
chrIV	458452	461396		45.6583	46.5037	52.7716	48.0739	50.6596	48.142	40.0926	58.1081	44.907	47.7308	46.359	49.8908	YDR006C
chrIV	461609	462656		53.2136	47.7786	52.2434	44.2128	47.0898	47.5375	35.9873	41.6378	55.3601	51.0419	44.2588	46.8136	YDR007W
chrIV	463279	465550		37.1776	34.7663	33.6353	31.3279	32.5693	32.2308	19.9604	33.2715	33.8441	32.004	26.8262	31.3704	YDR009W
chrIV	465578	470605		259.757	257.464	250.294	218.284	253.801	250.565	120.769	93.642	254.291	253.65	253.717	242.291	YDR011W
chrIV	471803	473020	2_RPG	293.624	305.563	227.511	305.652	313.022	310.939	135.872	112.702	371.985	318.621	310.518	300.27	YDR012W
chrIV	473139	473872		46.5532	43.0119	44.7648	40.8188	42.0784	40.2527	55.1939	35.4825	34.2375	41.7629	41.5136	37.7068	YDR013W
chrIV	478352	478792		32.2035	29.8448	31.1298	29.7965	28.9602	31.6382	29.8804	29.8497	26.9877	32.4476	29.3515	26.063	YDR016C
chrIV	478943	482279		48.6614	47.5443	48.0855	45.9578	48.9545	47.0483	51.5846	65.2896	45.3873	46.4327	47.848	46.4458	YDR017C
chrIV	484005	485414		12.9873	12.1642	19.3321	14.3659	11.9572	13.4911	45.4403	73.4245	15.6598	15.1684	15.2184	17.5599	YDR019C
chrIV	485451	486563		27.3796	28.0027	29.511	32.6391	28.9437	28.8904	36.9689	36.9448	26.0051	29.2916	24.9752	29.2352	YDR020C
chrIV	486695	488055	1_RiBi	26.4585	29.3327	28.9535	33.0363	31.5342	29.6079	31.9244	31.8897	20.5997	27.7545	23.3917	27.8265	YDR021W
chrIV	487965	488668		25.4753	26.5701	26.703	22.3928	23.6563	23.7846	45.4098	35.0127	19.8416	24.442	21.2354	25.3315	YDR022C
chrIV	489432	491053	1_RiBi	99.6229	101.626	69.3718	102.086	103.602	101.859	56.2086	43.9685	95.9723	97.509	97.1842	93.4646	YDR023W
chrIV	491449	492413	2_RPG	353.409	360.851	76.6258	323.001	375.367	368.137	55.4045	44.1719	349.284	364.53	336.361	302.55	YDR025W
chrIV	492469	494416		39.6087	38.4935	32.6396	37.6506	38.5524	37.8297	30.4642	26.872	38.5931	36.1636	34.8942	35.7041	YDR026C
chrIV	494574	497447		29.71	27.9413	36.9909	26.9148	26.6866	27.0343	43.8719	43.2793	26.3615	27.1045	29.2996	28.0384	YDR027C
chrIV	497555	501379		42.262	40.2408	44.9366	43.4603	39.5243	39.4143	45.3412	61.2017	37.724	39.289	42.4115	40.3941	YDR028C
chrIV	501638	503279		23.9851	24.5101	27.4091	26.1022	23.9228	24.7381	31.1499	38.0418	21.2835	24.7244	21.6241	25.1529	YDR030C
chrIV	503451	504011		11.7494	9.76795	14.7892	12.986	10.3629	10.9947	20.4617	30.7374	7.65587	12.0519	8.45943	13.7461	YDR031W
chrIV	503944	504762		23.7135	20.6831	32.9329	21.757	18.0877	19.2428	34.8904	58.4443	24.2876	21.8858	21.3838	23.6217	YDR032C
chrIV	507777	509549		146.9	157.84	93.7151	120.892	156.543	174.744	54.3052	54.1084	140.187	156.238	147.152	176.063	YDR033W
chrIV	509494	512250		38.2025	39.9899	37.4789	40.4376	39.0536	38.6603	43.5839	46.099	34.3595	37.822	37.9283	38.3417	YDR034C
chrIV	521725	523148		40.7478	40.3258	39.9782	44.2176	39.0479	38.7348	35.6088	41.0653	43.1161	39.7906	40.4212	42.7243	YDR035W
chrIV	523137	524783		26.3041	25.4558	29.9507	25.2116	24.6139	25.6046	36.8062	47.1521	26.0652	25.9833	24.1518	26.0121	YDR036C
chrIV	525278	527282	1_RiBi	127.924	125.189	108.934	136.4	138.362	135.717	85.1226	79.8116	141.405	134.231	133.423	133.874	YDR037W
chrIV	527277	530791		32.0939	31.4195	36.6298	34.8671	31.3519	31.0089	39.1499	50.8624	34.5073	31.0013	30.8886	31.6774	YDR038C
chrIV	531187	534676		30.3089	29.9614	35.05	33.2059	29.6492	29.5698	37.7184	50.3182	33.2108	29.7567	29.5227	30.4626	YDR039C
chrIV	534970	538894		25.039	23.7012	28.9326	26.5886	23.9523	23.5365	32.1647	44.2734	27.0711	23.6729	24.4324	24.9425	YDR040C
chrIV	539759	540573		35.7097	35.734	38.4572	34.1464	34.6772	34.1369	49.2801	43.1194	32.8729	37.0768	36.125	35.8235	YDR041W
chrIV	542553	543569		55.6803	57.1889	51.1642	69.8085	51.328	55.0114	66.2208	101.725	47.4954	53.4911	56.8768	54.4348	YDR043C
chrIV	546388	547765		19.5464	22.2651	25.6337	20.6824	19.1197	18.3964	36.2257	38.2711	19.8232	19.9603	18.8566	19.358	YDR044W
chrIV	547839	548467		45.5717	45.9581	47.1266	41.2869	46.404	46.5555	38.6689	30.34	34.6984	44.659	37.1831	43.6447	YDR045C
chrIV	548682	550668		74.6299	70.6653	79.0422	55.797	69.074	71.1327	63.4575	63.3347	79.6137	72.3545	83.1202	70.5174	YDR046C
chrIV	551389	553027		64.9586	65.629	69.7438	56.0759	62.2348	62.6994	58.4206	53.7456	75.0163	67.1808	66.9929	61.3876	YDR047W
chrIV	553224	555249		28.0837	28.8832	28.7983	30.2456	28.4954	28.5366	28.2711	33.9066	30.6323	28.4701	28.602	28.3132	YDR049W
chrIV	555646	556500		446.519	472.514	513.635	387.566	455.864	490.927	341.425	325.624	539.705	488.182	538.05	469.219	YDR050C
chrIV	556993	558104		36.9347	35.7544	42.5109	36.334	34.0328	35.487	43.2975	50.238	31.5061	36.3755	37.5601	34.1025	YDR051C
chrIV	558263	560777		42.8761	41.2194	43.3921	46.7448	43.8106	42.0937	38.3175	29.2832	41.2481	42.9741	47.1332	40.8725	YDR052C
chrIV	560970	562528		52.0452	48.7758	52.0718	52.7103	51.2215	51.5793	36.0637	33.4678	47.7664	50.3791	50.2771	50.676	YDR054C
chrIV	563446	565020		81.5867	79.3463	58.1073	68.1916	73.0181	83.256	33.8969	46.671	72.4427	78.0003	62.005	69.4516	YDR055W
chrIV	564917	565750		38.693	38.3339	38.1124	35.5205	35.4923	38.0726	31.5084	36.3303	34.1418	38.0644	35.916	36.3273	YDR056C
chrIV	565877	567633		18.2235	17.4224	19.3851	18.7042	16.7947	17.7125	19.5234	20.2986	15.3893	17.1781	17.2975	18.2587	YDR057W
chrIV	567588	568734		8.32484	7.31391	7.63654	8.33476	7.25237	7.45642	10.1803	11.7731	6.50555	7.42963	7.0943	7.30537	YDR058C
chrIV	569094	569824		20.6743	19.1117	29.2826	20.7632	15.8562	18.3302	29.398	55.5984	16.6578	17.157	17.5929	22.2053	YDR059C
chrIV	570553	573815	1_RiBi	56.2896	62.7038	65.6085	72.1979	67.6343	66.1763	56.5251	57.8036	58.8034	61.9888	61.3181	64.586	YDR060W
chrIV	574107	575894		27.1062	26.3216	31.0871	25.1642	24.1068	23.8776	42.3293	38.2914	26.1764	25.2	25.8733	25.3576	YDR061W
chrIV	576067	578447		43.2063	42.1426	40.4369	41.6373	43.8894	41.523	41.6916	43.9819	41.7409	42.4284	44.3982	42.6249	YDR062W
chrIV	578533	579242		49.2299	49.608	34.6643	40.994	44.3764	44.9066	46.6032	43.2218	39.7748	45.2244	44.3522	41.6681	YDR063W
chrIV	579358	580549	2_RPG	496.01	516.297	153.443	512.466	554.459	554.327	93.5647	71.0377	484.831	530.273	522.893	476.572	YDR064W
chrIV	582707	583535		35.3229	34.6101	34.1529	30.9354	31.5029	33.9826	41.7151	53.3718	25.0463	33.4068	30.3024	34.974	YDR067C
chrIV	583658	584819		27.4997	24.7203	30.2523	27.7547	26.0407	26.1522	39.3351	45.4565	22.7056	25.1001	26.0551	27.1694	YDR068W
chrIV	584636	587780		18.4639	18.7815	25.8081	18.3153	17.6296	18.7286	40.2354	48.8965	15.6129	17.8343	19.2216	19.6157	YDR069C
chrIV	588020	588456		25.2757	28.3381	29.6139	24.8698	25.1407	25.7703	34.0737	38.7275	25.3681	24.4976	23.0547	25.6399	YDR070C
chrIV	588743	589542		62.9342	57.4638	72.5825	53.9586	56.9828	55.799	94.2314	61.0652	47.3715	56.8046	54.9396	61.3586	YDR071C
chrIV	589662	591538		66.4377	68.7455	71.5826	63.2687	64.8301	70.9855	82.9938	58.7992	62.6837	69.1936	68.4754	67.2004	YDR072C
chrIV	593676	596825		35.8359	37.0769	43.506	32.9763	30.2079	34.271	62.262	73.3464	35.4737	35.1791	39.7898	38.5303	YDR074W
chrIV	596951	598245		26.8339	27.7607	29.5691	31.9967	29.7945	29.2042	34.4619	24.3008	25.8853	28.4022	27.8096	28.9932	YDR075W
chrIV	600726	602135		294.273	341.787	242.905	386.626	269.155	316.413	249.235	454.58	321.759	313	289.635	337.177	YDR077W
chrIV	601868	602884		73.0483	76.3069	64.174	80.5511	62.6417	68.6259	87.0553	141.727	55.8114	69.3981	61.2775	74.4015	YDR078C
chrIV	603028	603690		29.1468	28.9934	31.0355	30.2594	29.4582	29.3655	36.133	30.7459	22.3978	28.3282	25.2783	27.0602	YDR079W
chrIV	603378	603884		27.8369	30.6099	32.1817	31.5372	30.7847	30.0797	33.06	27.6491	22.7954	29.3585	25.3228	26.9625	YDR079C-A
chrIV	603974	607158		13.2216	13.6977	15.3552	16.2709	12.8169	13.2053	25.6466	25.6756	11.1145	13.6484	13.451	13.8629	YDR080W
chrIV	607160	610166		25.2754	26.3729	31.9665	28.6034	26.9041	24.8852	42.7606	41.0306	23.7623	25.1383	25.9429	26.5897	YDR081C
chrIV	610347	611981		26.8995	27.1879	30.8152	32.3276	27.8488	27.911	35.5059	42.6423	23.1687	26.9471	26.8451	27.4252	YDR082W
chrIV	612049	613367	1_RiBi	35.0825	35.3916	38.6461	45.6213	40.6437	37.2359	57.7018	42.9688	31.502	34.9135	32.5984	38.4931	YDR083W
chrIV	613201	614072		22.241	20.7195	24.2823	22.7872	21.0258	22.8306	28.8299	22.9793	19.6957	21.5499	23.5339	20.6669	YDR084C
chrIV	614198	616294		14.2183	13.7158	15.6063	13.8458	10.8395	12.1414	26.5175	35.7157	12.3378	13.3452	13.3463	15.3082	YDR085C
chrIV	616730	617289		91.5918	84.9758	70.9177	88.65	82.4647	87.8425	84.2521	66.722	73.3502	83.5623	71.7756	83.2716	YDR086C
chrIV	617375	618364	1_RiBi	59.4535	65.737	64.0369	74.1471	68.9486	68.0422	73.7065	70.3493	59.2619	66.0191	55.476	62.2386	YDR087C
chrIV	622067	624813		23.5661	23.6719	31.2804	20.8893	23.0864	24.1605	45.8791	37.2771	20.3031	23.0396	29.3702	25.1901	YDR089W
chrIV	624824	626116		27.6505	28.253	34.0211	28.0172	27.3534	28.1881	39.6489	36.7992	27.3716	28.1242	28.684	27.9431	YDR090C
chrIV	626372	628604	1_RiBi	62.0336	67.534	60.7674	69.503	72.231	71.4447	57.4303	38.5742	59.8245	68.9261	69.0029	67.0077	YDR091C
chrIV	629840	630700		55.2523	54.8093	69.0285	53.2296	53.6643	53.9646	62.3811	66.2486	56.8287	53.7357	55.7018	54.1987	YDR092W
chrIV	631014	636173		33.9278	33.5127	38.0981	35.4626	36.3216	34.924	39.9394	45.2442	37.8168	35.0526	39.0321	35.4367	YDR093W
chrIV	639942	643928		24.4022	22.4892	28.5422	26.5589	24.7254	22.2735	43.9496	39.6449	23.5983	22.3823	26.2035	22.0513	YDR097C
chrIV	644126	645035		49.1488	44.9763	58.779	49.8735	50.9038	46.0461	66.14	71.3203	47.4287	48.6974	51.8899	44.0684	YDR098C
chrIV	652780	654650		64.6115	63.7835	87.9685	62.4319	62.4811	63.6311	100.138	139.504	65.075	63.1839	70.854	69.3042	YDR099W
chrIV	654968	655571		23.7925	23.4275	27.4682	21.5034	18.639	21.2467	49.8424	36.1218	21.3425	22.6884	23.1927	22.6471	YDR100W
chrIV	655565	657492	1_RiBi	57.5353	62.7217	60.2066	76.5425	72.5135	68.4567	72.2429	54.1088	64.3778	66.3166	62.0818	66.3137	YDR101C
chrIV	658303	661142		31.5226	32.0691	38.8547	34.7759	34.6377	34.1822	49.2715	54.8375	29.9293	32.8616	35.9522	35.0827	YDR103W
chrIV	661026	664946		12.153	12.9224	16.7997	14.5612	13.0102	12.5937	21.8398	28.9808	11.5729	12.6512	12.243	12.9845	YDR104C
chrIV	665249	666841		16.9635	17.2672	20.7344	18.8081	17.3999	17.331	25.707	32.0867	17.3415	18.8299	18.3961	17.3244	YDR105C
chrIV	668873	671059		18.834	18.6042	20.4484	19.0661	29.2513	30.3658	141.167	143.815	28.4406	29.1919	31.4862	39.8812	YDR107C
chrIV	671200	673412		19.7474	19.8071	22.2145	20.4352	19.3332	18.8787	89.1921	76.1975	18.0193	18.8455	18.2547	22.443	YDR108W
chrIV	673399	675667		16.6279	18.4665	21.2337	19.5285	18.2061	17.0393	26.0674	23.6817	17.6738	17.9889	18.8895	18.7175	YDR109C
chrIV	676045	678008		27.1551	27.4733	33.4721	33.1052	28.9029	30.8631	44.6065	31.7563	24.882	27.8319	27.8179	28.896	YDR110W
chrIV	678009	680015		18.6457	20.6538	21.9854	20.6402	23.101	19.5222	29.7397	24.4336	21.4816	20.7923	22.2828	19.354	YDR111C
chrIV	680419	681717		31.2168	31.7749	34.3686	30.9546	34.1729	31.4868	34.0155	32.8195	35.2754	31.1477	35.7671	27.5697	YDR113C
chrIV	682117	682612		40.1278	41.548	39.0975	40.1744	35.4814	39.3143	37.1187	41.0593	44.147	42.2009	38.3696	38.7321	YDR115W
chrIV	682599	683614		33.2004	31.6236	32.5204	32.6035	31.6173	31.9153	33.1287	27.3312	34.4118	33.5117	34.5017	32.0868	YDR116C
chrIV	683898	685687		21.7657	22.4342	24.3831	23.8335	21.8882	22.36	25.5112	29.7651	21.31	21.4483	23.7049	22.5059	YDR117C
chrIV	685850	688032		21.6078	21.271	22.7595	22.4234	22.5164	22.5954	24.9147	28.3454	18.8529	21.3613	20.1769	21.0758	YDR118W
chrIV	688116	690615		41.8756	41.8455	40.9342	43.9655	44.9102	45.94	39.0247	31.3778	41.927	43.014	46.0385	42.8385	YDR119W
chrIV	690964	691460		11.41	12.9239	10.7356	10.0612	10.2087	11.9493	11.8292	11.7083	8.6778	10.8082	11.4082	10.2633	YDR119W-A
chrIV	691332	693261		33.0633	37.576	30.9786	41.4879	38.2728	38.8846	29.5979	23.7523	36.671	37.686	34.7908	37.2349	YDR120C
chrIV	693440	694283		31.1664	29.175	34.2841	36.7597	30.997	31.0739	34.6549	36.7133	33.2462	31.8703	29.1999	31.1353	YDR121W
chrIV	694381	698104		26.1268	24.537	39.4496	25.0489	22.6062	24.1275	48.7255	57.3619	28.281	23.6788	28.7548	27.9142	YDR122W
chrIV	698024	699506		30.528	28.8112	38.507	26.4942	31.4701	29.8617	39.615	36.6654	32.9835	29.299	30.538	29.3149	YDR123C
chrIV	704378	709303		42.9995	47.0098	43.6075	44.4356	42.2467	43.647	38.4151	44.732	47.3708	46.6867	51.7579	47.9744	YDR127W
chrIV	709503	713206		20.2914	20.6504	26.1465	22.7281	20.4576	20.859	22.8058	32.0522	20.3739	20.224	21.7409	21.147	YDR128W
chrIV	713192	715450		45.8011	44.4374	66.1175	49.4109	44.1857	45.4714	77.8546	84.3843	48.1814	46.3556	51.2306	48.2042	YDR129C
chrIV	715459	716648		30.8023	31.3297	33.2178	34.4043	29.4479	31.0108	34.7361	34.6179	29.6928	31.6417	32.3316	29.721	YDR130C
chrIV	716703	718557		14.4833	13.3423	13.8661	16.3306	14.8765	14.0803	17.7353	25.8937	10.8522	13.9796	14.0523	13.9224	YDR131C
chrIV	718697	720422		24.0652	22.9757	26.5062	25.4771	23.1581	23.5622	91.5129	99.5355	21.1464	23.4062	26.0747	25.3697	YDR132C
chrIV	722911	727592		31.5271	31.9755	42.8796	41.5802	32.9383	32.6565	34.9793	44.7289	30.9916	31.8172	37.4752	35.2979	YDR135C
chrIV	728152	730388		21.8485	21.9259	22.8817	23.7707	22.4049	21.2333	22.8897	28.0096	19.1469	21.7776	23.2178	20.7245	YDR137W
chrIV	730543	733490		29.7206	28.802	40.0581	31.2594	29.7143	29.8894	50.5387	52.7356	26.4733	28.8225	31.439	32.8673	YDR138W
chrIV	733442	733978		38.7236	39.0007	43.8455	37.539	32.5913	36.7529	33.9003	33.7524	32.0622	36.1268	32.7476	38.3971	YDR139C
chrIV	734122	734852		30.4586	35.6671	36.3327	35.7376	34.5703	32.3615	30.8379	28.9581	31.6691	32.0889	33.0115	31.8256	YDR140W
chrIV	734724	740099		22.546	22.6869	28.7315	25.4297	23.1998	23.0462	32.4125	33.6892	19.4673	22.4235	24.5485	24.3893	YDR141C
chrIV	740357	741746		19.9779	20.8353	21.4273	24.0324	20.3701	20.3032	16.0804	22.3858	20.2273	20.678	22.125	21.1305	YDR142C
chrIV	741961	744045		37.8369	39.0623	41.3051	42.0827	40.2074	39.7654	34.7305	39.4525	44.9727	40.8254	42.8207	39.9499	YDR143C
chrIV	744225	746261		44.703	45.2919	47.955	47.0422	46.3947	47.0767	40.9431	32.1964	47.3027	46.5911	48.4984	44.1256	YDR144C
chrIV	746648	748390		37.193	38.27	42.5733	40.9633	37.6308	37.8066	36.985	43.9756	38.2683	38.6584	42.0769	40.2492	YDR145W
chrIV	748612	750911		31.8601	37.9301	35.7589	46.5171	32.8098	37.7348	24.5191	18.8404	33.808	36.0224	40.8118	39.4688	YDR146C
chrIV	751558	753400		19.438	20.4561	20.1678	21.2978	19.2954	20.606	19.2612	20.1433	17.486	19.9613	20.9465	19.7423	YDR147W
chrIV	753395	755327		24.3236	24.3008	29.0501	23.6789	22.4834	24.3338	24.5761	34.1858	27.049	24.4194	26.4446	27.5703	YDR148C
chrIV	755558	763923		21.328	22.5163	26.7908	25.9813	22.7241	23.8669	18.8494	23.0788	22.1041	22.0422	24.5273	24.4697	YDR150W
chrIV	763919	765317		66.3052	64.2892	98.2213	60.1274	62.6041	64.3313	117.916	101.866	63.779	65.2809	67.2599	70.8089	YDR151C
chrIV	765628	766560		69.2869	73.7089	85.8972	87.1845	77.6139	76.8008	81.8458	82.7716	76.3903	76.155	72.8497	77.8421	YDR152W
chrIV	766611	768048		56.4965	58.5575	59.2501	65.477	63.3725	62.3818	61.3319	58.2398	64.398	61.2164	68.7898	60.9315	YDR153C
chrIV	768402	769094		293.083	270.39	500.88	213.709	242.187	275.553	410.866	266.224	335.223	271.216	293.663	315.152	YDR155C
chrIV	769467	770032	1_RiBi	105.41	106.402	127.496	105.793	116.1	108.235	122.714	89.4611	135.115	111.685	105.941	111.136	YDR156W
chrIV	770316	771577		72.8982	76.1426	71.9181	68.7889	72.3264	76.8639	61.8198	46.4659	86.491	76.2318	82.3342	77.1629	YDR158W
chrIV	771778	775841		20.71	21.3319	25.711	23.5485	22.1011	22.1282	25.4922	28.6711	20.234	22.5452	23.9222	23.3826	YDR159W
chrIV	775979	778772		17.7347	17.6585	21.1259	18.8381	17.912	17.924	23.668	29.7847	16.2624	17.3379	19.1012	17.7194	YDR160W
chrIV	779000	780286		32.2154	35.7126	41.0322	43.671	38.9073	38.0289	39.6313	33.0811	36.6617	35.4876	35.5106	38.198	YDR161W
chrIV	780211	781230		27.7177	27.1636	35.203	31.6477	29.2522	27.5193	45.2567	44.618	25.101	28.2595	30.9605	28.9431	YDR162C
chrIV	781348	782055		28.6885	27.1838	32.9815	29.3767	28.0906	27.5051	43.1257	42.5303	30.82	28.6346	26.0943	28.7095	YDR163W
chrIV	781927	784265		19.7513	18.7436	21.444	22.1895	20.5475	20.1973	22.1234	31.3388	17.888	18.949	20.5138	21.0654	YDR164C
chrIV	784827	786295	1_RiBi	47.1285	47.8261	50.9711	54.5256	52.5707	50.0674	52.1515	44.9804	39.1568	48.1117	44.8243	50.9752	YDR165W
chrIV	786194	789292		21.9148	21.8559	28.9333	25.2253	23.7003	23.9815	46.6244	38.4251	16.8427	21.4496	22.7084	23.8899	YDR166C
chrIV	789412	790170		40.1043	40.8092	44.7452	48.3606	40.5971	41.778	40.4984	52.2747	47.1609	42.9764	41.2052	39.9459	YDR167W
chrIV	790286	791926		31.4729	30.9806	41.4949	33.8868	31.275	31.3527	41.9963	56.865	27.3729	29.4905	32.1899	34.1206	YDR168W
chrIV	792106	794253		22.8041	23.819	27.8684	25.4059	22.266	23.0167	38.1335	45.5892	25.8059	22.253	24.5135	24.4509	YDR169C
chrIV	795993	802438		27.9098	29.3972	31.5397	31.4759	30.98	31.0498	24.6264	19.858	28.6002	29.1248	34.0645	30.8809	YDR170C
chrIV	806533	807833	4_HSF1	31.2067	24.6008	236.927	26.503	17.6953	21.9802	486.947	304.737	33.8429	25.3979	41.2265	70.8585	YDR171W
chrIV	808249	810558		87.5532	95.5168	90.0988	106.084	102.082	98.5727	69.4698	52.2602	108.327	98.8022	108.497	99.4079	YDR172W
chrIV	810494	811697		28.4753	28.856	33.4631	28.654	27.8105	29.216	39.8282	45.4821	30.7205	29.2727	28.7792	29.2249	YDR173C
chrIV	812073	813022		135.874	142.316	72.5067	123.874	146.514	150.852	65.5198	82.4887	168.262	144.868	133.786	134.036	YDR174W
chrIV	813072	814209		32.7531	31.4965	32.8801	32.877	33.7672	33.4927	38.614	45.8599	32.0213	32.3392	33.7882	33.1554	YDR175C
chrIV	814402	816829		38.5582	39.4002	44.081	38.6813	39.9287	38.8537	47.9259	46.9464	38.1105	37.7028	42.1889	39.2581	YDR176W
chrIV	816836	817588		41.8448	42.2584	56.8695	41.2392	40.9795	41.553	71.4357	81.2463	43.6447	41.7005	44.6117	47.1327	YDR177W
chrIV	817827	818665		21.1695	23.0568	29.7756	20.7883	17.996	20.6718	31.6142	48.0267	22.7919	22.2457	25.0173	23.8445	YDR178W
chrIV	818582	819229		10.9033	11.5968	13.8399	13.0437	10.9352	12.6112	21.4228	29.9831	7.05663	12.6262	10.7665	12.0396	YDR179C
chrIV	819330	820976		16.1969	17.1652	19.0329	20.4194	16.6233	17.6742	23.5983	29.3043	12.41	17.3092	16.4196	16.892	YDR179W-A
chrIV	821150	825825		15.194	14.1534	22.8969	17.1459	15.7024	14.6638	27.6082	26.6666	11.7798	14.8168	16.1792	15.978	YDR180W
chrIV	825767	827383		22.4613	23.2628	26.4811	25.681	24.1861	23.8464	33.6318	34.6778	22.1321	22.7154	25.312	24.7018	YDR181C
chrIV	827527	829170		25.0145	25.4126	30.0414	27.7382	25.2584	25.677	35.1141	42.2928	22.9739	25.5907	27.1256	26.1769	YDR182W
chrIV	829513	830324		22.7959	23.3468	26.3069	25.3246	26.3535	25.0436	49.0689	36.4591	18.9309	24.3596	23.2303	25.9691	YDR183W
chrIV	830388	831612		38.7514	41.9147	43.9289	49.8633	50.4622	48.7692	56.1573	40.7211	33.6825	45.1985	39.3474	47.4111	YDR184C
chrIV	831728	832585		33.9069	33.7638	38.7854	32.2913	39.9997	39.2141	39.7352	24.1316	39.4634	39.3934	33.9808	39.6412	YDR185C
chrIV	832735	835682		48.2922	51.9046	58.7124	62.433	53.6768	52.003	72.6302	71.938	54.5356	50.9109	55.938	54.3095	YDR186C
chrIV	836371	838225		81.8216	82.9665	108.273	92.2362	85.6396	88.9795	99.9153	98.0576	111.437	87.3335	97.067	95.8201	YDR188W
chrIV	838326	840487		30.3006	31.3745	33.3515	31.4459	30.6001	29.9317	35.259	29.8452	30.2133	31.7658	32.4217	30.5032	YDR189W
chrIV	840500	842054		57.8299	63.2849	69.7872	76.5578	66.9758	66.1175	77.4607	72.2413	66.0077	62.9963	67.1653	66.8756	YDR190C
chrIV	842291	843557		16.8291	15.928	17.0503	16.9798	15.4809	14.5026	19.1021	20.7069	15.9442	15.442	16.5665	16.285	YDR191W
chrIV	843474	844938		15.4787	16.5087	17.5736	19.655	17.0827	17.6202	19.8187	26.7254	19.8614	17.3151	18.3428	18.159	YDR192C
chrIV	845796	847978		52.5128	52.5999	71.1208	62.8202	54.9664	56.1878	79.4738	111.779	47.3458	53.1614	56.3423	59.0809	YDR194C
chrIV	848358	850275		26.4851	28.1814	35.8617	28.7398	25.9878	28.1215	60.05	45.1495	24.5475	28.1198	26.6626	28.2796	YDR195W
chrIV	850189	850999		21.5868	22.8526	29.1075	25.9818	22.9558	23.8457	40.2932	35.0477	18.9505	22.0444	24.7514	25.5155	YDR196C
chrIV	851193	852527		19.428	18.5086	23.9408	23.4578	19.2382	20.5357	35.1749	27.2974	17.2235	19.1827	19.6849	21.0804	YDR197W
chrIV	852490	854024		18.3761	19.1985	19.8103	23.6985	21.503	20.8509	25.3753	21.6147	17.7046	21.331	18.8336	21.3606	YDR198C
chrIV	854145	856170		15.7062	15.9864	17.9854	18.2345	16.3811	16.6365	20.6367	26.0268	14.2447	16.4227	17.0007	16.3704	YDR200C
chrIV	856268	856964		17.6365	17.3865	20.6255	20.5995	17.2502	17.3467	21.8022	25.9808	16.8355	18.0914	17.6191	18.7292	YDR201W
chrIV	856864	857982		17.2417	18.3259	22.6436	19.3329	16.2832	15.3946	26.2956	32.4677	15.0225	16.3831	17.0328	16.299	YDR202C
chrIV	858095	859251		15.7333	14.7287	18.0535	16.6978	13.3322	16.2517	21.2612	30.1082	18.1978	14.9457	14.8413	16.8086	YDR204W
chrIV	859312	861617		19.2586	19.0818	23.2064	21.6331	19.1006	20.1448	22.0405	27.9693	20.0161	20.0527	20.2607	21.3924	YDR205W
chrIV	861705	864938		26.5716	26.9364	31.0125	32.1959	30.0619	30.3851	36.1711	32.0537	26.2013	28.0015	30.6629	30.9527	YDR206W
chrIV	864816	867588		16.6751	16.7096	23.1438	16.7204	16.7764	17.857	23.7345	27.1852	20.9326	17.8396	18.7887	18.0914	YDR207C
chrIV	868053	870698		46.2072	48.1758	54.0427	52.769	48.0967	51.4612	50.3281	48.5804	49.9128	49.4541	53.0407	52.3851	YDR208W
chrIV	871040	871484		76.5741	82.6446	100.057	80.2471	77.0528	84.564	84.5045	51.7642	74.2224	81.1596	81.4869	81.5613	YDR210W
chrIV	884646	887020	1_RiBi	42.1197	45.9787	49.1141	50.9834	47.2108	48.9336	46.8934	56.5831	39.7599	45.5853	46.5861	49.5915	YDR211W
chrIV	887146	888998		49.9643	52.6941	67.4398	59.2244	54.2999	55.3957	49.5076	72.2342	55.5184	53.4306	58.5772	60.0258	YDR212W
chrIV	889530	892732		33.4833	33.8937	51.0279	33.0162	33.7041	33.728	44.7485	44.6388	35.7133	34.3482	34.5262	36.4467	YDR213W
chrIV	892732	894023	4_HSF1	77.7772	70.5423	224.716	56.9069	66.7146	71.9866	182.175	120.688	90.0473	70.9809	87.0632	103.939	YDR214W
chrIV	894508	899220		12.7303	10.2219	61.2548	8.61889	12.4824	12.2947	21.8827	22.3105	10.7604	11.1767	13.1509	17.7299	YDR216W
chrIV	899281	903535		18.372	19.6507	22.139	22.809	20.7681	19.298	24.6012	24.019	17.8942	18.8319	20.3656	20.4509	YDR217C
chrIV	905038	907097		24.7078	26.1103	30.2634	28.1556	26.6719	24.8843	33.4031	33.5998	21.3125	24.8318	27.7209	26.0514	YDR219C
chrIV	907299	909683		33.6522	34.2954	44.1056	35.8722	33.8131	34.0115	47.6986	45.6651	36.7888	34.4677	36.046	35.1993	YDR221W
chrIV	914198	914744		439.659	478.164	489.814	434.236	474.495	498.692	162.758	211.871	504.063	490.218	492.775	423.811	YDR224C
chrIV	915406	916088		421.288	437.778	401.461	350.473	443.61	452.93	112.821	91.8344	452.589	444.3	440.304	373.948	YDR225W
chrIV	916415	917282		99.5761	98.9541	92.5351	88.1446	98.3868	99.9823	63.8076	48.6084	114.903	96.5487	106.291	97.4603	YDR226W
chrIV	917444	921839		18.0592	18.9335	20.8722	22.9383	20.256	19.5631	30.6303	25.8306	18.8938	18.0281	21.028	20.8719	YDR227W
chrIV	921852	923894		31.9288	33.642	41.37	34.9568	32.3407	34.9694	54.9602	47.5187	29.4828	32.5314	36.2959	36.3489	YDR228C
chrIV	924682	926201		26.2278	26.1697	32.6291	28.3165	27.6657	27.2207	37.6374	36.4259	29.7316	25.99	28.6717	27.4684	YDR229W
chrIV	926136	926940		24.254	23.4732	34.718	20.8531	19.1129	21.6417	42.1952	44.288	27.0605	21.7197	21.8225	22.9808	YDR231C
chrIV	927190	929274		48.575	50.1426	65.7572	53.7991	53.2934	54.3194	71.4151	63.0367	61.7432	50.8042	57.9988	55.4561	YDR232W
chrIV	929321	930427		145.747	147.461	129.15	133.886	149.741	156.493	111.054	81.8331	150.94	149.678	151.082	159.645	YDR233C
chrIV	930923	933320		32.0968	35.5277	35.7282	40.6511	38.0509	36.712	39.7366	44.501	40.3014	36.024	36.6721	37.7661	YDR234W
chrIV	933471	935221		21.932	21.6963	24.1474	24.5001	24.5997	23.4132	32.2826	29.6509	16.4172	22.0811	22.9659	23.2963	YDR235W
chrIV	935139	935915		23.5229	23.1663	31.1404	26.4905	24.0868	23.8415	38.1727	48.3121	24.926	24.8678	26.5721	26.4356	YDR236C
chrIV	936471	937612		27.2958	26.7345	32.441	30.7092	27.5386	26.5309	44.3511	44.4783	27.4198	25.3744	28.8431	28.1217	YDR237W
chrIV	937616	940874		49.8735	51.3133	57.789	53.9577	52.7321	52.8479	53.2848	49.3361	52.5951	51.5945	58.8423	52.867	YDR238C
chrIV	940978	943443		16.6553	17.7533	21.3142	20.2615	18.1291	18.1419	26.7603	25.934	18.3139	18.078	18.5447	18.5053	YDR239C
chrIV	943614	945170		22.5813	22.1408	24.6167	28.2526	23.4466	23.996	27.1709	24.0893	19.5261	23.547	24.4749	22.9622	YDR240C
chrIV	946698	948597		20.2766	20.4351	27.7736	24.142	19.8946	19.9367	29.6313	27.6064	18.7833	18.7058	20.1659	20.0711	YDR242W
chrIV	948499	950314		19.5614	21.0791	26.4699	26.8673	22.7341	21.4432	35.9547	34.2546	20.6914	20.0244	20.6271	21.5631	YDR243C
chrIV	950536	952595		19.0787	18.5926	22.8181	21.4213	17.8441	19.3535	26.8572	32.4048	18.4514	19.5355	20.2895	19.2029	YDR244W
chrIV	952714	954131		50.6141	54.7618	55.6939	58.9076	57.731	54.679	59.973	55.0467	51.8662	52.546	61.243	55.8014	YDR245W
chrIV	954251	955097		32.36	35.838	49.3039	37.6977	34.4891	34.0806	55.1172	50.9118	37.8757	35.3406	37.1881	39.3291	YDR246W
chrIV	955709	957788		20.5497	20.6906	32.6001	19.4007	19.1842	19.784	54.0866	62.5354	19.4836	19.7628	23.5112	21.8988	YDR247W
chrIV	957654	958436		13.1536	14.3071	18.2079	15.6864	12.5281	15.3823	39.3765	41.7838	15.3386	13.8819	14.8929	15.3635	YDR248C
chrIV	958563	959858		22.6174	22.9048	28.0443	25.9021	23.1652	23.5225	38.2812	41.9173	19.7606	22.3169	22.2979	24.3725	YDR249C
chrIV	960303	963307		26.9586	26.0785	33.6211	26.2455	26.2225	27.2199	39.7745	40.0697	25.0716	25.8474	29.9889	26.9042	YDR251W
chrIV	963402	964451		22.8253	22.3339	25.854	21.913	23.5776	21.4566	34.5805	35.6457	20.5259	20.6633	24.4648	21.5353	YDR252W
chrIV	965024	967001		18.7903	17.4751	27.5852	18.041	17.9829	18.5245	37.2631	43.0744	16.6941	18.2392	22.0217	19.7466	YDR254W
chrIV	966328	967865		21.195	20.0357	30.0905	20.7249	19.2787	21.3069	39.0809	46.1743	19.4355	19.2802	24.1488	21.8128	YDR255C
chrIV	969672	971476		31.6558	33.0185	42.61	38.9194	34.0305	34.3331	59.5474	46.0567	30.214	33.2583	36.1331	37.3285	YDR257C
chrIV	971698	974275	4_HSF1	39.7673	36.4327	141.609	26.9591	32.9278	35.0784	216.059	116.663	38.4287	32.3149	45.3252	51.8398	YDR258C
chrIV	974486	975986		24.9496	21.6879	54.9741	20.095	24.0356	24.0175	95.5496	62.2607	17.3717	19.7821	18.963	28.0333	YDR259C
chrIV	976373	977287		46.6391	47.573	59.8952	51.0655	45.5611	46.7715	57.9403	45.4841	50.9317	47.1679	42.9403	47.3537	YDR260C
chrIV	977398	979308		34.7643	36.3984	49.1386	39.7785	34.525	35.2288	64.687	63.9907	35.354	35.3871	37.1612	38.5832	YDR261C
chrIV	995765	998427		34.1133	36.0302	37.5219	38.9992	37.3648	36.1514	37.4515	48.7014	35.831	36.0643	42.7599	37.4132	YDR264C
chrIV	998641	1000056		23.7619	23.7132	30.4522	23.939	23.6515	23.7546	30.9513	36.3734	24.0014	22.6508	26.0477	26.9625	YDR265W
chrIV	999980	1002237		32.8894	34.1189	34.7671	39.4987	35.3583	36.4921	30.1457	32.6039	34.6	33.8741	37.722	36.248	YDR266C
chrIV	1002315	1003571		32.2924	31.0342	36.1301	36.626	33.4043	33.8222	28.0176	41.1853	34.8099	33.1272	34.7885	35.0797	YDR267C
chrIV	1003929	1005246		42.6265	43.4837	45.8068	47.062	45.4838	46.3916	33.2539	42.3061	41.532	43.8066	45.7066	46.0074	YDR268W
chrIV	1005571	1008750		28.4535	31.7903	34.3057	29.4156	31.5824	31.0639	26.0998	48.3147	30.5672	30.9864	38.0435	31.8971	YDR270W
chrIV	1008924	1009887		27.3053	28.1343	28.6832	32.3183	27.8611	27.3148	26.4149	31.2413	28.9616	26.7246	30.1478	28.0934	YDR272W
chrIV	1012120	1013363		64.7321	61.2874	80.8828	60.2792	60.1951	66.8137	74.9667	68.3659	55.6024	56.0352	57.5518	69.266	YDR275W
chrIV	1013252	1013716		126.969	133.225	130.097	122.357	124.891	136.106	103.851	75.6911	114.034	129.786	124.31	133.923	YDR276C
chrIV	1014207	1015858		20.6123	24.7583	31.8093	18.9074	18.9169	23.2289	49.6167	62.1422	22.0504	24.5006	26.5745	25.3772	YDR277C
chrIV	1019288	1020502		23.6458	22.8928	26.4687	25.2001	24.1388	24.1281	25.5555	28.7325	20.9787	22.8967	23.8893	23.7244	YDR279W
chrIV	1020604	1021772		54.3423	56.5177	61.682	61.8496	59.0051	59.1786	55.7226	48.1746	54.7053	57.1757	59.917	59.3804	YDR280W
chrIV	1021802	1022426		41.3813	48.2605	28.1446	35.4916	40.7521	38.9845	33.2453	20.8601	31.8903	36.6027	33.0423	38.311	YDR281C
chrIV	1023168	1024760		11.4491	10.5556	12.1968	12.3428	11.2288	10.9202	14.7436	17.0685	10.8422	10.7984	12.3048	11.8317	YDR282C
chrIV	1024910	1030275		18.4272	18.835	24.2821	22.1903	19.2753	19.7738	27.056	30.3449	17.0275	17.9088	19.6025	19.7325	YDR283C
chrIV	1030461	1031706		31.7139	33.1662	39.6593	33.9111	31.0041	33.2106	42.9108	49.497	29.7026	32.8218	34.9078	33.6362	YDR284C
chrIV	1035951	1036959		14.3581	14.4453	17.5221	16.4017	12.22	15.1359	21.0088	29.3558	15.5524	13.3634	15.8931	14.4089	YDR287W
chrIV	1037139	1038270		23.6602	24.2189	29.8349	26.3061	23.8245	25.0157	42.025	38.6526	21.4301	24.4054	24.3433	26.186	YDR288W
chrIV	1038095	1039578		24.6144	25.981	31.1586	33.0344	26.0946	26.6534	35.3221	37.5119	21.7138	25.7691	26.6481	27.144	YDR289C
chrIV	1039727	1043176		17.1989	17.7847	21.4894	21.2121	17.7444	17.9452	26.2816	24.521	15.8168	17.1414	19.0021	19.1579	YDR291W
chrIV	1043088	1045172		31.3847	31.4217	42.2011	35.7312	31.2265	32.5666	40.1602	34.094	28.7389	30.582	33.5307	32.0151	YDR292C
chrIV	1045396	1049517		40.2932	41.5571	56.7436	50.4481	40.3537	42.1858	48.3737	53.5518	44.9381	42.0778	49.2645	45.7918	YDR293C
chrIV	1050406	1052304		27.1536	28.991	37.987	35.1465	27.7854	28.5799	33.5488	45.7236	32.4214	29.3502	32.3683	31.5091	YDR294C
chrIV	1052536	1054908		16.5394	15.6096	23.0714	19.2665	15.6553	16.3393	22.6882	28.4816	14.5152	15.7756	17.0777	18.1526	YDR295C
chrIV	1055157	1055967		49.4833	52.0683	59.5753	56.0262	51.2874	51.3551	58.9919	50.1121	60.8276	51.2481	54.878	49.6857	YDR296W
chrIV	1056431	1057764		33.9826	37.2308	43.0937	40.1158	37.6665	37.7936	51.0129	40.2328	35.2157	35.3115	40.1037	32.8314	YDR297W
chrIV	1057997	1058992		52.9442	53.4164	63.2214	52.4642	51.991	54.5033	49.6569	53.0174	57.9849	57.472	65.522	58.7231	YDR298C
chrIV	1059565	1061489	1_RiBi	56.5925	58.9673	73.8537	83.4739	71.4134	68.4381	89.7787	58.6945	56.9643	63.7206	64.3802	68.0488	YDR299W
chrIV	1061412	1062873		41.5192	46.9994	52.1133	50.163	50.0308	49.3833	64.4691	40.8959	42.7912	46.3883	48.357	48.6512	YDR300C
chrIV	1063275	1067475		22.8576	22.3666	28.9734	25.2544	22.5623	22.8633	31.4012	33.4858	21.6031	22.001	25.3784	23.6425	YDR301W
chrIV	1067658	1068470		22.8568	22.9292	28.1494	27.3598	24.3779	24.4196	30.0373	20.4036	19.9863	22.9379	24.2294	24.2653	YDR302W
chrIV	1068619	1071701		27.8581	26.7642	31.187	28.3034	28.9254	28.763	29.8846	30.0011	25.999	26.395	31.3058	29.4833	YDR303C
chrIV	1071808	1072611		43.7513	45.5089	57.5171	48.8905	42.618	47.873	64.5354	86.9398	48.6897	44.8887	46.5858	47.1639	YDR304C
chrIV	1073659	1075227		19.0518	19.5295	22.3089	21.1542	18.4048	19.9212	26.0906	24.0668	17.7133	17.8608	19.6518	20.1838	YDR306C
chrIV	1075804	1078005		19.2032	18.45	23.2035	18.7939	17.9357	18.1058	39.2129	32.9753	15.5663	17.0391	18.7562	19.5221	YDR307W
chrIV	1077867	1078488		34.5309	32.7332	34.0563	37.4976	33.5844	36.1924	45.0974	38.8575	28.2533	32.8341	32.9956	35.4983	YDR308C
chrIV	1078682	1080247		79.7999	83.942	74.8557	88.363	90.883	88.5433	97.066	70.7621	90.7136	84.8474	95.394	78.1326	YDR309C
chrIV	1080920	1084518		38.7443	39.6853	44.9102	38.4489	41.6901	42.218	45.5814	33.5141	45.5714	39.8329	46.3618	43.1639	YDR310C
chrIV	1085055	1087094		27.2202	28.5228	29.1664	29.4335	27.8408	27.7002	26.1829	24.5485	26.8289	27.4129	32.4734	28.6316	YDR311W
chrIV	1087530	1089078	1_RiBi	33.1459	33.6353	37.934	42.1886	38.9349	37.6199	40.2018	33.21	35.1695	37.0711	34.3795	38.5019	YDR312W
chrIV	1089017	1090111		26.4908	26.4802	42.4013	30.5256	26.2925	26.0632	51.997	45.119	30.6463	27.1481	30.4169	30.1711	YDR313C
chrIV	1092674	1093631		20.0406	20.0544	22.3736	23.7646	20.4354	22.1579	22.1132	22.6792	14.5892	20.6539	19.8424	20.2895	YDR315C
chrIV	1093734	1095250		22.5483	22.9055	30.5298	27.8961	24.6044	24.3586	30.6036	39.1479	21.0385	23.3385	26.166	26.125	YDR316W
chrIV	1103740	1105073		27.0606	25.6049	34.6317	27.571	26.4084	28.1429	48.4479	38.5728	24.7945	25.2797	28.4999	28.5549	YDR318W
chrIV	1104926	1105904		27.3574	24.378	28.4014	28.928	27.3908	29.1099	33.6283	31.0248	22.8697	27.5154	29.7168	30.1183	YDR319C
chrIV	1106017	1108126		24.5202	24.7255	25.9599	26.9648	24.7855	25.5231	29.9033	32.018	24.5525	24.3994	25.8238	24.66	YDR320C
chrIV	1108199	1108519		52.9874	51.8145	49.5224	48.0561	51.1834	56.5838	45.9732	35.4739	50.1078	51.8924	45.3977	48.6392	YDR320C-A
chrIV	1108659	1109936		32.4645	38.4067	43.2994	39.7228	41.5451	40.5637	45.3757	31.2618	40.6996	40.1191	38.2274	39.4253	YDR321W
chrIV	1110561	1111787		27.0396	27.8502	30.8177	29.1288	29.2944	26.1049	38.2486	33.9972	27.4203	27.2427	29.2787	30.035	YDR322W
chrIV	1111794	1112340		47.1366	44.2859	52.4703	44.0266	43.4799	47.0588	43.4238	44.0512	44.4686	49.0938	50.4452	50.4074	YDR322C-A
chrIV	1112279	1114053		19.4614	19.0779	21.3426	19.7377	19.1431	20.0766	30.4597	25.4934	18.1313	20.0461	20.0725	20.6794	YDR323C
chrIV	1114250	1116763	1_RiBi	41.5721	45.4774	43.4076	62.0667	55.8004	52.3598	39.0609	28.6289	41.0754	48.3524	47.9913	53.5836	YDR324C
chrIV	1117115	1120309		18.5544	21.3095	21.0543	26.1102	21.2961	21.367	23.354	23.6317	19.2565	21.1069	22.9503	21.6586	YDR325W
chrIV	1120512	1125124		25.7587	25.7548	29.1462	31.2519	28.1232	27.8108	32.3272	34.2188	23.9916	26.0356	28.8409	27.8068	YDR326C
chrIV	1125239	1126094		34.8768	37.0271	46.9172	39.8498	36.8373	38.0224	41.8832	47.6893	43.6627	37.7271	39.0847	39.8995	YDR328C
chrIV	1126034	1127622		19.2579	21.4028	28.75	22.7315	19.0155	20.3204	33.0959	47.4006	22.0917	20.8252	22.741	23.1688	YDR329C
chrIV	1127792	1129454		16.705	17.1043	30.8081	21.2993	16.5644	16.5859	33.2675	60.4971	19.9914	18.2844	19.4562	21.1415	YDR330W
chrIV	1129468	1130898		35.5878	37.4223	37.2008	37.7644	35.736	36.609	37.873	36.4681	32.0904	36.7768	39.762	35.9171	YDR331W
chrIV	1130974	1133170		18.4514	16.9479	20.3618	19.9758	18.0623	17.5059	22.2766	25.452	15.1382	17.3216	18.5059	17.9641	YDR332W
chrIV	1133042	1135466		29.7264	31.9114	41.8892	35.952	31.8927	32.5573	49.742	60.2823	29.8518	29.7294	34.8337	34.5378	YDR333C
chrIV	1135766	1140570		39.0153	39.5339	59.0886	44.3054	40.8154	42.6849	43.0567	65.6769	43.0304	40.3325	46.3405	47.0198	YDR334W
chrIV	1140795	1144933		32.282	31.7351	45.8685	35.2515	33.6044	33.3926	37.8686	53.0202	30.7341	31.7156	37.328	36.0486	YDR335W
chrIV	1145067	1146145		39.0518	38.437	39.5094	40.0223	39.0999	40.0485	36.22	33.7684	33.6435	39.222	38.9767	40.6715	YDR336W
chrIV	1146254	1147230		33.5855	31.7372	36.4383	33.1697	34.44	32.7547	40.5484	39.5103	33.2003	32.3252	34.6457	33.6124	YDR337W
chrIV	1147242	1149523		20.7621	19.861	24.8118	23.2736	20.7652	21.7509	38.9011	50.4559	21.4671	20.2072	22.2797	22.1808	YDR338C
chrIV	1149843	1150558		54.6777	56.5167	60.4162	66.7554	61.3683	63.205	47.3823	40.211	55.2543	59.4986	59.3796	59.239	YDR339C
chrIV	1151636	1153716	1_RiBi	49.5304	53.2917	52.8612	63.6039	59.3742	60.1448	40.0425	28.3905	53.8839	54.4096	60.3874	56.999	YDR341C
chrIV	1154071	1156017		31.9839	40.2348	62.6324	30.8319	33.6373	41.6831	92.1493	100.408	38.6791	43.7508	40.9934	50.2273	YDR342C
chrIV	1159563	1161402		32.1815	40.8144	63.6546	31.0921	34.0922	41.9274	92.985	100.597	39.3306	44.4172	41.6161	50.676	YDR343C
chrIV	1162810	1164690		112.949	146.842	156.929	104.14	133.699	151.911	118.613	80.4271	135.323	154.918	134.681	151.243	YDR345C
chrIV	1166935	1168880		50.9855	53.4474	64.1566	58.3789	54.8912	58.4676	45.6096	53.5412	52.7868	54.543	55.6263	58.6603	YDR346C
chrIV	1169059	1170260		39.1908	38.2879	46.3141	40.4457	36.7046	38.3515	39.7533	48.2397	39.8984	36.9306	38.0195	41.4781	YDR347W
chrIV	1170126	1171963		38.279	37.806	39.8388	38.6739	38.9821	39.5836	22.7092	28.4843	41.6154	38.1801	42.6327	40.6034	YDR348C
chrIV	1172262	1174283		34.3947	35.4209	46.1024	39.8192	35.0673	36.1463	33.0845	42.8017	38.4153	36.849	35.7918	37.3889	YDR349C
chrIV	1176048	1178200		21.3387	20.4739	26.6241	25.796	21.2845	21.4289	21.9574	36.5122	20.2136	21.8812	23.3511	25.2115	YDR350C
chrIV	1178443	1181404		30.7489	31.5671	38.3377	39.2058	32.6177	33.98	28.5471	39.1602	28.9098	33.004	34.4686	36.3316	YDR351W
chrIV	1181621	1182987		42.5298	44.9667	53.74	43.622	45.0121	46.3203	39.9613	38.1165	42.1302	41.8746	45.4062	43.8742	YDR352W
chrIV	1183205	1184325		91.4067	89.5771	84.5093	84.3301	89.0974	88.5597	48.7509	51.2246	103.872	87.0372	90.7148	86.964	YDR353W
chrIV	1184619	1185948		30.6704	30.8536	34.6894	29.9233	29.2896	29.6593	33.2868	35.3143	32.7706	30.1583	32.1352	30.5653	YDR354W
chrIV	1185993	1189181		22.9953	22.0491	27.9181	26.0723	24.295	23.6806	33.0415	26.9264	21.3665	22.3268	25.9806	23.6702	YDR356W
chrIV	1189100	1189736		28.3551	25.9614	25.5325	23.9333	26.4369	28.5674	22.8467	18.3382	20.0334	27.8591	27.1443	29.5456	YDR357C
chrIV	1190005	1191894		15.2248	14.2842	21.9928	16.0997	11.8681	13.7195	29.9897	38.7401	14.69	13.8921	15.6555	16.5279	YDR358W
chrIV	1191859	1195197		30.6996	32.685	33.8931	39.6266	32.0517	33.5234	39.9322	41.8708	34.8671	33.2908	36.566	37.3267	YDR359C
chrIV	1195158	1196308		44.9852	46.5842	52.1932	53.1468	53.1543	47.9856	43.4081	43.4702	44.5226	49.3205	44.8606	48.6951	YDR361C
chrIV	1196625	1198805		18.1863	17.7257	21.9881	19.4035	17.5343	18.5599	19.205	33.3591	18.3868	17.3345	18.9319	19.0221	YDR362C
chrIV	1199001	1201510		16.0116	15.7194	17.6007	18.9194	16.9438	16.823	14.7985	19.9174	14.1918	15.6808	16.7944	16.7433	YDR363W
chrIV	1202087	1202545		64.4306	71.7737	93.3805	68.4963	61.2758	70.1984	49.7345	45.8693	54.1621	66.9119	65.2051	74.8283	YDR363W-A
chrIV	1202493	1204231		31.5047	32.5483	41.7535	37.1104	32.8919	33.4843	35.7548	35.5639	29.2283	32.2485	33.1896	35.4597	YDR364C
chrIV	1204402	1206467		40.1164	46.0948	48.2557	61.9972	52.0817	49.1818	42.8838	38.9351	45.0521	48.5854	45.5651	51.1051	YDR365C
chrIV	1212790	1213650		27.5335	30.2089	30.6528	33.4936	31.1685	29.5187	27.95	25.9804	20.8313	27.4628	29.1719	29.7169	YDR367W
chrIV	1213817	1215005		21.5945	22.2862	33.1379	23.8611	20.6637	22.2412	29.9419	31.4041	23.0328	20.9625	24.6052	23.5186	YDR368W
chrIV	1214946	1217601		11.8518	13.4183	14.3608	14.3308	12.7333	12.4481	16.4552	18.5914	11.1682	11.5092	12.5305	14.0276	YDR369C
chrIV	1217725	1219122		27.8574	30.8586	30.765	33.3154	30.4056	32.5252	28.4456	29.2787	25.7536	29.9387	30.2866	32.5872	YDR370C
chrIV	1219333	1221046		15.0613	13.3789	19.0055	15.2777	13.7446	14.2835	16.6249	24.2807	12.449	14.1647	14.2982	14.8681	YDR371W
chrIV	1220967	1222463		37.8814	34.8658	40.1968	39.2969	36.5123	36.2247	33.2621	43.3077	32.0744	36.1563	37.3586	38.6632	YDR372C
chrIV	1222644	1223411		26.743	28.2151	32.6934	30.9104	26.2143	26.1376	27.1585	44.7301	23.3429	26.31	26.2903	27.9178	YDR373W
chrIV	1224728	1225254		20.3686	20.0975	22.4488	20.6658	17.7567	20.7535	19.7393	21.4529	18.8522	21.2367	22.6232	20.2396	YDR374W-A
chrIV	1225105	1226555		21.9898	22.0153	25.7749	22.5412	22.3331	21.3321	29.0716	33.0953	23.4318	21.502	23.6986	24.01	YDR375C
chrIV	1226757	1228339		19.3257	19.1316	22.7535	17.6766	16.1212	18.1492	29.7265	36.2547	18.6715	17.3166	19.9947	19.9236	YDR376W
chrIV	1228514	1229320		65.3351	63.4825	62.775	51.7715	60.7568	62.2541	50.1435	45.2334	56.8453	65.3254	65.9894	68.2837	YDR377W
chrIV	1229138	1229625		54.1823	52.8522	52.3987	51.8829	50.2808	56.5913	45.9994	45.8853	47.2343	52.8456	54.6523	55.516	YDR378C
chrIV	1230100	1233201		21.1105	20.6794	24.5878	23.6989	19.9546	20.7761	23.5128	35.8274	19.7243	20.6962	22.28	22.1881	YDR379W
chrIV	1233110	1233751		14.5483	11.3203	19.9782	15.0579	11.8195	13.1984	19.0801	31.8809	10.5619	13.0383	16.067	18.9042	YDR379C-A
chrIV	1234097	1236250		37.9735	33.158	60.4418	36.0748	33.4784	34.2658	48.4354	70.4261	33.1357	31.3995	45.0661	44.3704	YDR380W
chrIV	1236459	1238196		239.328	240.051	248.469	253.067	251.373	263.758	128.74	120.037	268.836	247.891	283.892	263.501	YDR381W
chrIV	1238182	1239120		39.1099	36.0421	45.0699	35.7751	36.5376	37.3592	46.1986	34.1321	32.4736	35.6994	35.5511	37.6647	YDR381C-A
chrIV	1239409	1239970	2_RPG	238.476	244.843	112.991	248.489	277.395	284.008	66.6816	43.668	319.96	268.967	244.236	253.706	YDR382W
chrIV	1239879	1240701		68.2878	67.8561	51.2234	61.692	69.73	68.72	50.9245	39.2973	70.4372	66.4599	64.2592	65.0395	YDR383C
chrIV	1241041	1242174		49.2841	52.39	31.6517	36.9304	66.9079	55.5832	31.3515	22.2295	61.3749	50.0656	40.5552	36.3223	YDR384C
chrIV	1243121	1245910	1_RiBi	215.497	240.94	136.659	261.403	253.777	259.482	72.0862	73.9279	288.918	252.626	270.742	247.142	YDR385W
chrIV	1246071	1248125		15.3634	13.9927	15.6591	15.9641	13.756	14.9075	14.1985	22.9722	13.6296	13.6343	15.0837	13.6894	YDR386W
chrIV	1248046	1249965		18.3615	19.7813	24.4672	20.9762	18.2192	18.1025	30.995	42.2178	19.1728	18.8893	20.3134	20.3122	YDR387C
chrIV	1250133	1251756		30.8272	31.6635	40.1394	32.7231	30.6745	29.7394	45.7566	62.9009	36.3909	30.9732	34.8413	32.5112	YDR388W
chrIV	1252013	1254816		37.53	38.1866	44.9865	43.2758	37.9834	37.8134	58.868	54.4724	40.1458	37.4983	42.6933	41.0629	YDR389W
chrIV	1254783	1256874		23.4827	24.0814	29.1511	28.0574	24.3895	27.4164	32.1811	30.0797	21.9391	25.1959	26.1903	26.1644	YDR390C
chrIV	1257237	1258480	3_MSN2	17.6351	16.1539	20.83	18.1759	16.3161	16.5637	26.2531	43.2367	16.1953	16.7	17.9784	18.0208	YDR391C
chrIV	1259830	1261449		43.6755	41.3326	57.8572	46.5619	42.2248	44.6112	64.8292	74.37	39.569	40.6467	45.0338	43.9514	YDR393W
chrIV	1261575	1263054		68.5808	66.9213	104.021	70.1029	66.5481	66.8784	91.8188	127.546	72.974	66.6987	72.3906	75.8817	YDR394W
chrIV	1263188	1266247		49.3158	51.2468	51.7984	57.6225	57.5101	55.3728	55.7598	41.9839	48.8306	52.317	54.6893	55.1596	YDR395W
chrIV	1266265	1266986		49.5591	49.5214	49.5988	47.529	53.4568	51.9703	38.5642	34.3331	55.2092	51.8539	49.3862	52.7037	YDR397C
chrIV	1267394	1269521	1_RiBi	58.3396	64.1427	60.4885	73.8883	72.4057	68.4309	61.3173	49.5686	70.2815	65.6511	64.2213	68.7061	YDR398W
chrIV	1269976	1270846	1_RiBi	154.459	178.537	119.014	144.306	177.076	180.562	82.0815	61.9625	159.668	173.349	155.789	171.659	YDR399W
chrIV	1270985	1272235		27.2372	26.0917	31.9265	27.117	27.4703	26.0024	52.7648	45.0378	25.8478	24.3063	27.7532	26.1841	YDR400W
chrIV	1272198	1273744		6.77875	5.67307	13.4485	6.80476	6.15985	6.4611	30.1042	24.5188	6.5438	6.55818	7.3729	7.33845	YDR402C
chrIV	1274558	1276243		5.69279	6.32224	11.6431	7.4812	5.53077	6.04825	36.1138	37.6704	5.79307	6.22934	6.63215	8.34373	YDR403W
chrIV	1276509	1277374		47.986	50.2827	54.0745	50.5295	44.2042	50.0416	54.5226	55.5703	50.0369	48.8425	48.5366	47.7402	YDR404C
chrIV	1277570	1278573		45.1567	47.1006	58.7205	51.326	42.116	45.8376	58.5709	74.9515	55.9495	49.4381	50.5349	53.4587	YDR405W
chrIV	1279078	1283925		12.7923	12.4339	18.1191	15.3297	11.3618	12.8917	21.7884	28.5744	13.7225	12.9868	13.8877	15.3978	YDR406W
chrIV	1283997	1288042		22.27	22.9014	27.1335	23.8015	22.0459	23.1304	28.3111	30.3258	21.1524	21.7413	25.0318	22.8977	YDR407C
chrIV	1288042	1288942		51.7941	53.4921	58.6049	57.575	51.3554	53.7019	57.3324	58.0913	66.99	55.03	51.9796	52.3898	YDR408C
chrIV	1289365	1292361		24.6209	25.2958	34.454	27.0373	25.3462	25.9258	47.9287	46.5564	26.2567	25.1539	27.5906	26.9887	YDR409W
chrIV	1292346	1293159		43.4107	46.7227	49.7911	50.962	46.0685	47.8144	49.7869	50.1082	43.3295	45.6456	45.0963	47.09	YDR410C
chrIV	1293303	1294442		25.4975	24.7313	34.0395	23.1311	23.6198	26.304	39.365	43.7603	26.7178	24.353	24.8462	25.3876	YDR411C
chrIV	1294624	1295542		36.2446	43.1215	40.008	51.3357	47.2462	45.3469	44.8853	37.6338	43.9886	45.5118	41.4145	43.597	YDR412W
chrIV	1295416	1296912		22.6141	22.1279	24.7319	23.5598	23.1819	23.443	30.9606	27.4807	19.7199	22.2376	24.0455	23.8719	YDR414C
chrIV	1296956	1298214		28.9548	29.1405	29.5966	30.9095	29.3363	29.9633	29.2077	34.1831	30.0241	29.2888	30.6524	27.3601	YDR415C
chrIV	1298367	1301044		44.5018	45.4104	25.0715	46.5922	45.9475	47.8916	22.3913	25.9762	45.0532	46.129	45.1008	42.9435	YDR416W
chrIV	1301580	1302214	2_RPG	316.116	333.146	70.8994	324.502	352.937	351.871	32.0377	32.2687	360.57	349.712	345.81	315.915	YDR418W
chrIV	1303123	1305434		13.7807	13.2871	13.6865	15.4527	13.2857	13.4902	14.2576	18.4388	13.8145	13.4502	13.3609	13.5575	YDR419W
chrIV	1305984	1311813		33.5045	35.8124	37.861	43.6931	37.7379	37.9059	32.654	34.0685	38.5994	36.0016	40.3715	38.2725	YDR420W
chrIV	1311962	1315147		15.3186	14.309	18.8568	17.6148	14.537	15.2248	25.9382	32.9426	14.1222	14.4893	16.2387	16.7998	YDR421W
chrIV	1315033	1317827		27.9673	30.0983	38.7147	33.6191	29.1935	29.4854	42.157	39.8369	29.1455	27.8663	31.1632	30.1909	YDR422C
chrIV	1317975	1319275		40.2532	40.0228	43.7032	41.188	39.7697	41.0121	46.1333	57.9579	43.1553	37.7694	43.0827	39.3562	YDR423C
chrIV	1319357	1319896		64.8003	68.048	61.457	64.5952	64.6502	67.8423	54.0247	45.5617	63.8283	68.6142	62.4483	62.1847	YDR424C
chrIV	1320012	1322025		19.8494	19.2345	24.6291	20.4258	18.0343	19.8973	27.04	38.6881	15.9556	18.3157	17.625	20.1999	YDR425W
chrIV	1322160	1323484		64.5473	59.7587	98.1915	65.5872	63.8398	60.6957	122.393	105.514	51.5957	58.6594	63.9332	70.2877	YDR427W
chrIV	1323446	1324270		34.0344	35.3334	60.5845	38.1243	35.4649	37.5393	116.952	87.6106	31.1717	34.1808	36.6925	42.0317	YDR428C
chrIV	1324372	1325341	1_RiBi	90.3943	98.5958	101.165	111.981	105.653	98.4253	93.5793	76.7882	106.251	97.9065	101.547	99.7436	YDR429C
chrIV	1325276	1328550		26.792	26.5991	36.1279	29.6759	26.7964	28.2675	33.6138	50.3496	27.9413	27.494	28.0195	30.3266	YDR430C
chrIV	1328738	1330453	1_RiBi	136.946	139.565	180.884	162.885	151.023	145.933	150	148.645	173.541	143.61	167.128	164.99	YDR432W
chrIV	1331139	1332957		22.3015	21.9049	21.601	23.9173	20.5658	21.4786	23.2917	22.8351	17.1532	20.2629	22.7799	20.3559	YDR434W
chrIV	1332818	1333995		15.7013	14.1706	17.4119	16.2262	14.6366	13.7755	20.6764	27.7063	14.614	14.5572	17.1967	15.2163	YDR435C
chrIV	1334566	1337068	3_MSN2	18.2257	17.2282	20.673	18.9137	16.195	16.789	22.9371	36.5543	19.3141	16.5658	18.9774	18.0248	YDR436W
chrIV	1339573	1340829		20.2857	20.2284	23.4145	25.0526	21.9823	21.7553	32.1387	33.55	19.6775	21.8118	21.7468	22.3416	YDR439W
chrIV	1342389	1344347		21.1988	20.9735	23.8642	21.8669	21.1984	21.5579	36.0451	34.3013	20.875	19.2177	22.4226	21.5875	YDR440W
chrIV	1344386	1345209		49.4087	52.198	53.3066	50.1522	49.5995	52.7929	73.5367	53.0299	48.3716	50.0633	47.9456	52.1153	YDR441C
chrIV	1345128	1349966		14.418	14.3295	17.0942	14.9558	14.5229	14.6644	20.0012	29.786	13.9597	13.9817	15.2582	15.7453	YDR443C
chrIV	1350196	1352393		20.662	22.3596	23.1785	23.5986	22.788	22.1398	25.3889	22.1672	23.0931	21.8566	24.015	21.4963	YDR444W
chrIV	1354709	1355586	2_RPG	274.527	289.252	70.6756	290.717	311.699	304.273	37.2441	27.4758	299.665	296.006	298.127	276.898	YDR447C
chrIV	1356038	1357435		40.6528	40.6685	40.2712	38.81	41.7483	41.5798	65.015	41.8309	44.5337	41.8856	45.1345	41.7873	YDR448W
chrIV	1357388	1358955	1_RiBi	47.3421	45.4775	42.5831	53.0856	54.6301	53.3201	49.7541	35.9152	36.8845	49.2106	44.8171	51.4708	YDR449C
chrIV	1359856	1360916	2_RPG	272.198	284.604	72.827	283.071	297.498	299.408	53.479	46.7645	272.008	292.887	295.895	264.423	YDR450W
chrIV	1360905	1362241		49.6545	54.312	51.2457	63.517	49.8721	59.3253	51.5602	66.0709	57.11	55.7189	60.9958	61.4777	YDR451C
chrIV	1362726	1364940		40.9171	41.1778	45.5399	42.0848	40.6722	42.2331	58.4128	60.5496	40.8697	41.188	46.8661	44.6932	YDR452W
chrIV	1364986	1365742		19.8743	19.9383	21.5119	17.7032	16.4926	18.0434	32.9223	31.9106	18.7493	18.7582	18.1187	20.2024	YDR453C
chrIV	1366158	1366862		43.9299	46.2242	43.1544	44.1856	49.8802	47.8875	39.4429	29.9532	46.7101	49.6052	43.7217	47.0773	YDR454C
chrIV	1367417	1369455		20.2111	21.473	24.7784	20.8358	19.9806	21.6478	29.0562	33.8568	19.7433	20.975	22.0849	21.7621	YDR456W
chrIV	1369674	1379673		27.4342	27.856	33.8376	31.2747	28.9764	28.8839	27.5157	33.4482	26.9049	27.2421	31.3654	30.5307	YDR457W
chrIV	1379878	1382093		26.4009	25.5243	30.1071	32.5707	25.7498	26.6081	41.0456	38.833	23.9703	25.1328	26.233	27.4854	YDR458C
chrIV	1382213	1383537		27.7223	27.3811	27.3811	29.7718	27.2931	28.6126	31.8639	36.1733	27.0605	26.9006	26.9569	28.4029	YDR459C
chrIV	1383669	1384916	1_RiBi	46.6016	46.1092	37.51	43.5872	46.7266	45.1477	43.3658	42.9747	44.1193	45.5265	47.5347	44.585	YDR460W
chrIV	1385151	1385432		81.1673	96.1363	32.4432	55.4393	81.922	82.4814	31.8817	26.6707	84.905	95.7283	76.4998	83.8182	YDR461W
chrIV	1385353	1385822		23.2653	22.2509	14.9305	15.7046	19.5682	20.2077	20.7915	21.8607	20.9677	21.5079	18.6327	21.9413	YDR461C-A
chrIV	1386009	1386639		49.6523	51.55	52.8361	49.9555	48.8239	53.3922	70.1224	77.2967	59.7359	52.8979	50.7488	48.6502	YDR462W
chrIV	1386759	1388585		40.4039	42.5688	39.4467	46.7986	43.1461	43.4163	45.0281	60.7921	46.1897	40.6615	43.9929	43.0237	YDR463W
chrIV	1388752	1393245		22.2003	23.2712	24.7391	27.3268	24.8514	23.7562	27.4788	26.6826	25.0543	23.4549	26.0035	23.8316	YDR464W
chrIV	1393154	1394640		29.7174	31.7534	34.0672	45.6698	37.4839	34.7293	39.9949	36.9823	29.6244	33.073	28.6461	37.5448	YDR465C
chrIV	1395005	1397857		27.1065	27.5031	42.9282	31.0918	28.9675	28.6603	59.3208	59.2233	28.3077	28.0198	30.4365	31.9259	YDR466W
chrIV	1397927	1398858		44.1097	42.888	42.2462	45.4345	43.7396	42.449	55.5853	40.2295	35.7736	44.8961	43.2928	42.182	YDR468C
chrIV	1398973	1399822		32.3339	32.6098	26.1618	33.4684	32.0884	33.3288	28.9983	27.5836	27.2155	32.6114	33.8041	31.7662	YDR469W
chrIV	1399574	1401303		20.1919	18.9869	22.5817	18.1191	18.1649	18.9827	40.8581	41.7743	17.618	18.8829	21.9529	19.6872	YDR470C
chrIV	1401609	1402682	2_RPG	267.848	280.61	68.7386	267.607	293.689	293.385	59.0806	51.5527	284.159	283.442	277.184	257.132	YDR471W
chrIV	1403195	1404312		74.9612	76.317	83.5576	85.6045	72.4686	76.6548	115.188	86.0803	70.0866	71.5584	76.0215	79.6485	YDR472W
chrIV	1404269	1405920		20.1737	20.592	23.1097	22.3975	21.0507	20.169	37.5912	43.408	17.9361	19.5578	20.2539	20.8284	YDR473C
chrIV	1407350	1410190		21.6577	22.1911	30.2052	23.0137	21.0642	21.8106	34.5322	38.9933	24.8785	20.2584	24.7418	23.9894	YDR475C
chrIV	1410252	1411190	3_MSN2	45.9812	46.8322	53.7652	42.6033	42.7174	44.4383	56.4896	63.2403	56.6157	44.4928	42.8625	46.9725	YDR476C
chrIV	1412077	1414393		33.0281	32.4004	40.4566	34.1398	33.3378	33.4554	50.1864	48.6167	32.3779	32.2415	35.3044	33.405	YDR477W
chrIV	1414536	1415237		27.8871	29.6151	29.4926	33.1556	30.1123	30.8849	47.9089	46.48	28.5866	28.9708	29.5676	30.8709	YDR478W
chrIV	1415125	1416934		27.2125	28.1591	38.8354	29.6201	26.8154	27.6687	53.4585	65.0917	29.5128	27.0989	29.6867	30.2668	YDR479C
chrIV	1417332	1418695		24.7084	23.8172	28.4765	25.9553	24.2311	23.3343	32.4112	39.3264	24.5274	22.2148	25.6094	22.6204	YDR480W
chrIV	1418439	1420303		33.4212	34.5176	41.3277	33.1795	31.854	31.2461	54.9789	80.4373	35.1705	28.7452	33.3168	33.6382	YDR481C
chrIV	1420325	1420945		28.8953	32.8389	32.0314	29.4961	28.3565	26.581	34.4704	37.2962	33.3025	30.2412	25.5213	27.13	YDR482C
chrIV	1421106	1422598		49.2954	50.3012	48.752	51.2806	50.2263	49.362	44.09	42.9026	47.706	47.3775	49.8762	47.7801	YDR483W
chrIV	1422732	1424783		17.1641	16.0056	18.9985	18.0504	16.7106	16.7643	29.2656	28.3261	11.0917	16.6575	16.8875	17.6561	YDR484W
chrIV	1424665	1427248		25.1083	25.4985	31.9449	29.403	26.5696	26.1289	43.4345	50.0144	26.0832	24.0873	27.7528	26.3388	YDR485C
chrIV	1427313	1428165		38.1489	37.0197	51.4896	44.1148	37.4384	37.54	52.0199	63.9521	35.4432	34.3343	35.5983	39.7819	YDR486C
chrIV	1428249	1429057		48.5709	50.5751	53.9227	53.8617	50.2807	49.5882	59.9224	58.3324	52.7862	50.1767	48.6272	49.5654	YDR487C
chrIV	1429098	1430790		14.9791	14.0497	18.269	15.6481	13.6905	12.6119	25.0678	30.8311	17.0716	14.4245	14.3465	13.3715	YDR488C
chrIV	1430992	1432183		35.0713	34.438	37.8388	34.7351	33.3944	33.3886	46.4019	43.2561	33.6307	34.9768	36.8801	33.049	YDR489W
chrIV	1431803	1434351		19.4497	19.164	28.0711	20.5	17.5024	18.5212	45.4622	47.7108	20.2387	18.5902	20.0053	20.0769	YDR490C
chrIV	1434768	1435966		36.9184	45.9315	49.0718	51.8424	42.6197	48.2885	67.8218	63.1446	40.3917	43.9463	35.2523	59.8608	YDR492W
chrIV	1436098	1436690		38.7872	38.7423	39.207	38.5106	39.5336	41.3585	51.9023	47.9727	41.2073	41.593	38.6551	43.325	YDR493W
chrIV	1436864	1438088		33.6974	33.8216	36.9041	37.9018	34.0431	32.955	54.7193	56.793	32.4574	32.3151	32.1988	33.5304	YDR494W
chrIV	1437919	1441210		15.7035	14.8144	16.3211	16.0635	15.1228	15.6851	31.1247	27.8746	11.3413	13.5705	15.0694	15.4637	YDR495C
chrIV	1441356	1443439	1_RiBi	63.9179	70.7903	69.0185	87.1004	82.7773	76.3858	66.484	40.9715	62.1569	73.105	68.6109	75.2846	YDR496C
chrIV	1443607	1445566		91.2409	89.6685	90.6553	68.7872	86.3502	82.2395	73.0326	72.0443	104.473	83.6689	102.248	81.4166	YDR497C
chrIV	1445768	1447035		36.18	32.5939	39.0932	32.6656	30.0693	30.9785	41.6006	44.0014	36.8285	32.0896	35.1177	32.5776	YDR498C
chrIV	1447800	1450188		28.4457	27.5787	24.267	25.9093	28.6366	28.4135	33.1786	26.5354	24.52	26.7001	29.172	26.9186	YDR499W
chrIV	1450105	1450871	2_RPG	266.759	273.543	94.2278	265.919	285.014	284.868	69.998	54.8398	252.92	272.623	276.972	257.512	YDR500C
chrIV	1451326	1453059		22.8518	21.4063	21.2257	21.5203	19.0954	19.2949	45.457	55.9129	19.6501	19.712	20.6169	20.2722	YDR501W
chrIV	1453014	1454519		105.229	89.2791	89.1369	63.0921	89.1505	82.6372	71.4073	90.7028	98.6176	79.1775	99.699	77.8054	YDR502C
chrIV	1454828	1455947		33.5106	30.5608	33.0887	25.241	28.4233	28.0221	38.7149	34.265	27.5346	27.0735	29.1401	25.4829	YDR503C
chrIV	1456587	1459499		28.1358	25.7216	31.7319	23.3733	24.3691	25.1957	32.1612	57.7742	25.2713	26.3807	29.5503	27.9063	YDR505C
chrIV	1459245	1461570		19.8216	19.9116	20.2852	17.3661	19.0951	19.5558	23.8444	26.6377	20.0356	19.6396	19.1441	18.5183	YDR506C
chrIV	1462176	1465906		48.5746	45.9546	46.0388	47.1354	46.8164	44.45	41.9895	30.9955	47.3235	43.8679	53.2577	43.1163	YDR507C
chrIV	1466225	1468486		149.433	146.832	154.632	127.632	147.622	147.439	128.399	132.213	154.446	138.482	150.275	133.48	YDR508C
chrIV	1469313	1469837		84.8444	85.5334	92.183	75.5059	76.7612	85.5116	76.5768	87.0608	88.597	82.585	79.6835	82.2215	YDR510W
chrIV	1469970	1470505		38.9918	40.2358	46.5662	42.2135	37.9939	40.1228	52.2947	64.0173	41.9788	41.7826	39.4062	41.4242	YDR511W
chrIV	1470414	1471063		31.9453	29.4145	35.7012	28.2302	26.2896	27.7347	40.5943	49.7424	31.072	29.2113	29.4458	27.9533	YDR512C
chrIV	1470993	1471549		39.7827	40.4133	45.2107	41.3784	34.9461	37.4386	48.2108	82.635	37.2983	38.9186	41.7682	39.4117	YDR513W
chrIV	1471497	1473058		26.3516	28.4207	30.3193	31.8545	27.4543	28.5407	23.7728	40.8153	25.7669	27.2505	29.7311	28.805	YDR514C
chrIV	1473200	1474805		22.7509	20.5135	34.4636	27.0606	22.3576	21.6503	27.313	50.4629	16.4634	20.3894	22.7662	26.0909	YDR515W
chrIV	1474854	1476586		19.8494	19.736	30.4717	15.1557	14.2996	17.7656	31.8297	50.1719	21.5738	19.4214	21.0745	19.0336	YDR516C
chrIV	1477123	1478463		34.9289	34.9719	38.0619	24.8437	28.6084	31.4281	34.7712	33.9135	39.8375	32.6861	36.2893	31.352	YDR517W
chrIV	1478557	1480211		17.4857	16.1196	26.1863	13.9065	14.2772	13.751	37.5048	35.818	13.9768	14.292	15.5058	14.4557	YDR518W
chrIV	1480354	1481013		41.7231	44.2754	45.167	34.5006	39.6217	38.5913	42.2677	34.2625	39.5648	39.3096	36.1516	38.4841	YDR519W
chrIV	1480963	1483487		22.3423	23.1363	34.2553	25.7931	22.78	22.8702	43.1024	35.9048	20.7301	22.4677	23.2922	24.9491	YDR520C
chrIV	1487269	1489055		37.6021	36.0869	38.7656	36.3812	37.282	37.2671	47.9736	37.0034	31.0984	36.9902	36.2648	36.8617	YDR524C
chrIV	1489242	1489592		256.04	159.554	134.554	144.413	247.109	255.907	182.119	160.611	263.401	180.371	150.615	242.6	YDR524W-C
chrIV	1489440	1489841		656.521	679.742	460.642	556.841	661.886	722.155	395.477	284.392	729.334	695.606	598.011	662.792	YDR524C-B
chrIV	1490508	1490898		71.0904	71.9488	67.3034	61.5826	60.5759	68.515	86.1325	69.7126	70.1	71.27	63.1018	64.9952	YDR525W-A
chrIV	1491027	1492438		54.1952	55.6275	65.4966	59.8685	58.7188	57.8094	97.4159	75.6312	53.7099	54.0235	53.8271	58.2323	YDR527W
chrIV	1494266	1495962		65.541	60.6888	74.1363	57.1418	61.6993	58.6253	101.513	82.6482	58.0404	55.894	65.3353	60.1584	YDR528W
chrIV	1495971	1496603		82.9241	80.0011	91.6817	70.6435	71.0603	79.6556	89.5664	87.9396	89.5472	86.9322	90.3472	83.4945	YDR529C
chrIV	1496671	1497914		36.2627	36.8161	40.748	32.5472	32.9751	34.1503	48.7263	49.5237	41.4493	37.8499	36.1577	37.279	YDR530C
chrIV	1498177	1499417		27.3833	26.2394	37.496	30.9876	24.4583	25.5471	46.6529	52.313	22.6633	26.7305	25.4361	28.1947	YDR531W
chrIV	1499353	1500603		22.4406	20.7389	24.348	24.814	21.2746	21.2081	32.2172	38.6737	17.2086	21.1331	22.347	21.7729	YDR532C
chrIV	1501358	1502222	3_MSN2	21.3917	20.2955	30.692	26.1533	18.4197	18.5779	39.7851	59.9176	22.0442	21.1045	22.318	24.9973	YDR533C
chrIV	1507788	1509798		9.92697	9.95918	14.6448	10.0983	9.98183	9.12189	21.6072	24.0638	9.53095	9.24573	10.3533	9.9993	YDR536W
chrIV	1519524	1520932		15.9029	17.1014	20.0677	16.9971	14.9941	14.3336	29.7209	25.1634	16.011	17.0572	17.0499	17.226	YDR541C
chrIV	1523229	1523700		0.211614	0.227516	0.666433	0.22707	0.155053	0.161359	1.92297	2.04248	0.174416	0.18741	0.213418	0.207983	YDR542W
chrIV	1525837	1531770		0.273172	0.250489	0.305682	0.223329	0.222181	0.247103	0.439056	0.55079	0.22147	0.174435	0.240934	0.187706	YDR545W
chrIX	448	6620		1.60206	1.61538	1.62881	1.46482	1.47975	1.43461	1.52576	2.10662	1.79468	1.38091	1.67663	1.38136	YIL177C
chrIX	8759	9173		0.690193	0.414783	1.05372	0.49756	0.37471	0.746232	1.46041	1.86014	0.811522	0.667681	0.344879	0.582319	YIL176C
chrIX	11491	16427		14.7148	14.7156	14.9351	15.6887	15.129	14.9854	18.5282	21.2175	15.1797	15.2261	16.36	15.6617	YIL173W
chrIX	16699	18660		4.73321	4.39901	8.27094	4.04929	4.27572	4.09392	12.9466	21.2861	4.81863	4.52784	4.54998	5.06405	YIL172C
chrIX	22895	26159		162.208	193.767	97.1497	175.736	181.34	186.27	55.4247	84.482	206.612	197.235	206.836	178.983	YIL169C
chrIX	33616	35009		17.6281	17.3157	21.7907	18.4093	16.3973	16.9453	27.069	30.1502	20.5115	16.9006	19.0458	19.2946	YIL164C
chrIX	37345	39126		13.5435	15.142	16.4786	18.4224	14.4612	13.927	20.7871	37.3164	15.9419	15.4476	15.0005	16.287	YIL162W
chrIX	39422	40174		26.9862	30.3677	29.7214	34.57	28.0818	28.6638	26.2849	20.4087	27.1728	30.6132	29.6953	27.4087	YIL161W
chrIX	40207	41478		12.1801	11.8082	15.4794	10.9712	11.8586	10.5782	24.1241	27.3271	14.9036	11.6817	12.6033	13.2187	YIL160C
chrIX	41809	46071		23.1631	23.7267	23.1753	22.8677	22.451	23.489	27.9555	41.3195	20.3282	22.3448	21.4657	22.2564	YIL159W
chrIX	46189	46910		54.7639	58.8608	47.8444	67.6059	52.5255	63.3707	36.0885	26.2378	58.2722	59.128	53.9059	64.4334	YIL158W
chrIX	46740	47575		29.2996	27.7416	28.1517	32.132	26.4656	28.3525	27.4556	31.5969	28.0186	30.0432	27.3495	29.4507	YIL157C
chrIX	47666	48055		33.1098	32.6681	30.7738	33.7871	29.6212	34.089	38.4687	42.0754	34.4766	34.775	29.7086	29.6909	YIL156W-B
chrIX	51499	53778		18.3936	18.3232	31.1303	19.1262	14.9997	16.7586	36.0217	46.0176	22.0278	17.9772	18.7293	19.7847	YIL155C
chrIX	53910	55072		39.4204	35.9738	50.7728	39.0239	34.2046	35.2945	52.3841	77.7728	54.7106	39.5284	40.2839	42.8722	YIL154C
chrIX	55164	56425		26.5539	26.6179	27.9807	27.3059	23.736	25.5254	35.9463	48.4083	32.2023	26.4472	26.1749	26.3871	YIL153W
chrIX	56528	57382		27.5201	27.7313	29.5376	26.5713	26.5454	26.6559	29.147	32.2365	30.7577	26.3259	27.0445	26.3546	YIL152W
chrIX	60896	62761		24.1326	25.418	23.9749	28.1846	26.4233	23.5315	24.6612	30.6154	25.9118	24.79	24.203	24.3685	YIL150C
chrIX	62930	68208		30.4027	29.5805	31.8587	33.5203	30.4492	31.2015	35.8893	39.3898	26.3282	28.7473	32.0217	30.1033	YIL149C
chrIX	68681	69594	2_RPG	356.614	365.668	81.0386	344.69	382.504	379.317	45.5896	41.019	338.899	367.435	350.967	327.988	YIL148W
chrIX	69500	73668		34.2213	33.2872	24.0927	33.7659	34.3112	33.1169	22.9402	22.8994	32.7866	32.7723	33.8976	30.7663	YIL147C
chrIX	74077	75945		13.5534	13.8618	22.9044	13.5806	13.1615	13.9307	25.0107	26.5266	13.3311	13.5276	14.2846	15.5122	YIL146C
chrIX	75930	77355		43.4958	44.1329	45.602	46.0133	43.7826	44.8611	34.555	39.99	46.3234	45.7611	44.788	43.0758	YIL145C
chrIX	77993	80377		32.4219	30.8033	30.6297	32.9667	31.5647	31.1695	30.5468	29.6487	26.0851	29.8828	32.3646	31.3257	YIL144W
chrIX	80287	83077		27.8043	29.2525	37.2284	33.3237	29.5042	29.5748	31.5956	37.9594	31.0882	29.5032	30.9707	31.964	YIL143C
chrIX	83264	84939		92.8689	93.8998	114.822	104.028	95.376	95.4794	78.0238	76.2328	114.934	95.8138	101.727	102.715	YIL142W
chrIX	85215	87885		37.5184	34.5679	40.3472	34.7646	33.9677	32.7244	47.238	39.8675	36.471	34.1743	38.5716	33.1723	YIL140W
chrIX	87878	88736		24.7905	23.9271	23.4325	21.7865	22.1666	23.0933	30.9767	22.1385	19.7352	23.5215	22.3534	23.1147	YIL139C
chrIX	88878	89744		53.5182	56.7968	48.029	56.3619	53.0757	53.821	39.85	34.492	48.9438	50.5406	54.5036	53.1578	YIL138C
chrIX	89878	92836		23.4652	24.3175	23.6523	24.8717	23.6842	22.959	18.1298	30.4164	24.0507	23.2421	25.829	23.041	YIL137C
chrIX	93574	94885		22.8455	21.0553	23.1083	22.1879	19.735	19.5931	24.8718	47.9313	27.4725	22.5531	21.3028	22.0179	YIL136W
chrIX	94921	96432		33.5251	32.6232	35.8793	33.6932	31.5806	33.0611	31.7654	45.0899	38.0111	33.4132	35.5831	34.1915	YIL135C
chrIX	97334	98505		68.06	59.7805	51.0928	55.2875	61.6377	57.102	44.1718	42.6217	65.2094	57.865	57.0311	52.9487	YIL134W
chrIX	98426	99433	2_RPG	295.947	300.28	60.5977	288.607	322.15	317.189	38.1858	33.3303	320.301	312.566	310.85	270.611	YIL133C
chrIX	99703	100561		27.963	25.8484	14.6632	21.6467	24.7736	24.0904	20.1495	19.8619	23.2711	25.6771	23.416	20.0074	YIL132C
chrIX	100718	102328		24.0713	25.61	21.6994	25.9673	23.9137	24.7592	18.4016	18.4946	27.0644	25.1659	25.6676	21.9855	YIL131C
chrIX	102630	105760		38.6483	42.1067	35.6974	42.6725	43.0567	41.7243	28.8704	29.6489	37.6957	40.7367	42.0129	40.3491	YIL130W
chrIX	106022	113344		20.0885	19.4069	24.4959	20.6253	19.471	19.347	19.3213	25.8233	17.8946	19.593	21.0071	20.6016	YIL129C
chrIX	113721	116950		32.4016	30.4325	46.1596	34.7262	32.1911	31.3256	49.875	42.868	25.5542	30.8243	31.7928	32.5702	YIL128W
chrIX	116990	117683		48.3788	53.8942	50.629	64.13	56.6254	54.3876	35.7286	31.68	48.7774	53.4912	44.716	51.2808	YIL127C
chrIX	117909	122207		42.687	44.1903	44.3346	46.4251	45.1078	45.3417	33.0914	30.7668	43.8632	43.6681	49.3254	44.0258	YIL126W
chrIX	122394	125819		31.0123	29.813	35.4602	28.8913	26.878	28.1152	32.3913	42.1231	32.09	29.1846	33.6804	29.9631	YIL125W
chrIX	126145	127199		44.8996	46.6297	45.6176	41.9731	39.3926	41.7764	40.1723	36.9017	43.8711	43.4234	45.0726	41.3206	YIL124W
chrIX	127661	129919		76.8033	79.0523	74.5819	79.3265	75.6496	77.7412	71.2801	73.2686	90.0847	77.7207	81.2776	72.0098	YIL123W
chrIX	130307	131818		14.6342	18.3195	21.7334	22.9048	13.7776	16.9894	34.0638	36.8317	17.3225	17.7707	15.8712	21.0606	YIL122W
chrIX	132218	133999		13.5005	11.6563	18.6545	12.7709	11.4215	10.3586	28.4376	29.3359	13.2536	12.0078	13.8091	14.4454	YIL121W
chrIX	134298	136199		40.2062	43.3002	42.2595	42.1938	41.1094	44.5529	50.0883	33.9828	37.0651	41.3002	38.7774	43.0232	YIL120W
chrIX	136408	137903		24.5425	28.6436	29.3709	19.1024	27.1573	27.8056	43.6182	33.1997	20.5825	25.9302	27.0985	30.0673	YIL119C
chrIX	139601	140489		54.8906	57.3679	61.445	56.702	54.9641	53.2636	85.289	59.7737	51.0542	55.5023	55.2284	55.61	YIL118W
chrIX	140536	141634		37.3458	38.3204	47.896	46.9005	34.8845	35.7515	68.0763	57.3747	34.6811	39.0068	31.7402	40.6503	YIL117C
chrIX	142842	144180		30.6545	32.5958	36.8657	33.1365	29.4948	30.0319	48.8829	54.3667	32.3938	31.4539	28.6229	29.936	YIL116W
chrIX	144264	148888		31.3291	31.6407	33.0024	33.4014	31.5584	31.4433	32.1042	30.1213	30.6376	31.3033	31.9888	30.7779	YIL115C
chrIX	149130	150020		24.8772	27.2771	34.1415	27.9323	23.9003	23.2981	35.8514	36.0528	26.1742	24.8437	25.6254	25.1131	YIL114C
chrIX	150526	151293		12.6965	13.2773	18.3306	16.8133	11.8307	12.0369	22.723	40.4919	14.1449	12.0867	12.2568	15.3068	YIL113W
chrIX	151550	154935		29.0803	29.0507	38.502	33.2313	28.99	28.2768	48.714	53.841	29.158	28.2777	30.7347	28.9896	YIL112W
chrIX	155151	155799		43.5829	41.2628	59.9481	40.1628	37.3412	43.2454	67.6758	65.5955	40.3293	40.5893	42.7723	41.9538	YIL111W
chrIX	156013	157291		33.2333	32.8175	36.2725	34.7706	34.7093	33.7986	45.2919	41.3802	29.2249	33.1972	30.7499	32.7859	YIL110W
chrIX	157270	160272		52.843	53.1704	62.7247	51.8947	51.5281	52.5173	58.439	55.8941	60.0961	52.0052	56.3124	53.1666	YIL109C
chrIX	160672	163050		30.8735	29.656	39.8386	29.4718	27.1583	28.22	42.2387	47.8923	32.2294	27.072	29.2497	29.4888	YIL108W
chrIX	162885	165942		13.2643	12.8349	17.3513	14.3145	11.6625	12.3287	30.5859	45.5294	12.3176	12.6422	12.0253	13.7933	YIL107C
chrIX	166398	167527		41.1503	44.428	44.0986	49.3008	41.6662	44.3555	51.9214	40.0129	43.9963	44.4527	42.9863	47.8973	YIL106W
chrIX	167412	169781		29.554	29.2151	39.0148	29.8364	26.5424	28.3406	51.8387	42.0478	27.8748	28.0943	29.1843	29.3254	YIL105C
chrIX	169906	171558	1_RiBi	27.5756	28.951	28.975	34.5849	31.2127	30.4679	35.1104	36.3565	27.1022	30.778	27	29.899	YIL104C
chrIX	171661	173102		38.1406	40.7509	48.6213	41.8654	41.1093	41.5375	58.5004	50.7051	35.2151	40.8669	39.9476	39.6679	YIL103W
chrIX	175288	177451		9.50854	9.39158	12.3699	10.7592	7.34178	8.84205	19.1013	66.7488	10.5365	9.33596	8.41336	14.2764	YIL101C
chrIX	177978	179663		5.05973	6.05521	5.32816	5.11924	4.53072	5.16314	9.69623	29.1174	6.11176	4.93096	4.76398	5.01449	YIL099W
chrIX	179681	180281		26.2032	26.249	26.5452	29.2029	22.0037	25.3556	30.9992	40.3338	25.7568	25.7282	23.0928	24.641	YIL098C
chrIX	180400	182069		11.0365	9.69231	12.874	10.041	9.25754	9.86097	16.8988	23.4186	6.82973	10.0693	9.10928	10.3869	YIL097W
chrIX	181975	183192		18.1599	20.0128	19.0539	21.8766	21.1174	21.4765	25.6614	18.486	15.4678	20.412	15.648	20.4759	YIL096C
chrIX	183767	186444		19.9974	20.6151	26.7811	21.4285	20.9062	19.8591	43.4561	42.434	17.6856	19.8023	20.7299	21.8403	YIL095W
chrIX	186308	187673		58.0615	57.083	60.1024	57.7658	62.7353	60.4536	54.4061	59.5786	62.6445	59.587	58.2729	56.9368	YIL094C
chrIX	187890	188946		63.1621	65.6885	61.9357	58.7775	62.1608	61.541	51.1047	53.8335	69.8662	64.9111	57.933	61.2836	YIL093C
chrIX	189011	191083		21.4808	22.1244	27.2315	22.5012	22.715	20.2601	40.0701	29.6335	19.2151	20.2326	20.8006	21.0238	YIL092W
chrIX	190991	193243	1_RiBi	46.8731	52.0993	51.425	61.8278	56.7845	53.0386	57.572	48.354	47.2542	50.4787	48.0068	52.0594	YIL091C
chrIX	193456	195429		33.252	33.5931	31.321	37.5664	34.0087	34.6913	32.3184	37.1801	31.0096	32.8839	32.9586	33.8099	YIL090W
chrIX	197839	199483		18.0731	18.5336	20.9965	17.5589	16.1875	17.1176	26.2275	38.8447	16.3132	16.3227	17.3276	17.3289	YIL088C
chrIX	199567	200192		23.7838	22.9816	28.1557	21.5548	19.5294	23.4854	34.2169	49.2657	26.0267	22.0024	21.9985	23.0469	YIL087C
chrIX	200437	202115		37.9129	38.2214	37.8997	38.8462	37.1838	37.7484	31.4621	40.1241	36.2263	36.9132	39.7307	37.1933	YIL085C
chrIX	202242	203300		52.8059	56.7852	51.7037	55.5459	54.7607	55.6155	50.7115	57.036	59.1457	53.8872	54.3505	50.9401	YIL084C
chrIX	203458	204757		32.2106	32.8252	39.4994	33.4438	32.1008	32.0428	35.4837	45.4074	30.6155	30.8443	28.0036	30.4312	YIL083C
chrIX	210822	212135		38.0804	41.331	37.7733	45.0515	45.0299	42.813	30.7712	35.092	39.0132	42.0024	37.0536	40.9564	YIL079C
chrIX	212433	214778		90.978	95.0895	89.569	102.381	102.772	101.146	72.506	71.5262	99.6725	98.3869	98.7317	97.6325	YIL078W
chrIX	216616	217803		56.4806	52.9788	61.9361	49.3758	49.9739	50.2971	55.5554	55.6547	43.6372	49.2851	46.8861	50.8858	YIL076W
chrIX	217765	220761		80.5194	75.419	119.99	80.183	74.5727	74.4942	92.99	107.317	81.6708	76.2524	83.1439	87.493	YIL075C
chrIX	221027	222623		46.7284	42.2107	52.7164	37.7535	40.375	39.5862	57.1643	63.8799	40.8762	39.6122	41.6309	41.628	YIL074C
chrIX	228431	230026		17.4125	15.9842	15.6321	16.5637	16.2464	15.8047	19.8756	25.3674	12.9233	15.0644	15.1797	16.0722	YIL071C
chrIX	230147	231149		42.1253	39.7434	35.6725	37.3091	36.2983	38.1335	30.9538	36.2762	38.7752	38.9592	38.7507	35.6211	YIL070C
chrIX	231372	232413	2_RPG	314.021	318.627	73.1323	299.44	342.824	327.752	47.2631	47.2793	313.147	326.266	307.795	285.526	YIL069C
chrIX	233023	235532		24.7284	23.222	18.9495	22.8145	23.5011	23.2918	19.634	26.2571	20.9358	22.0949	23.4278	23.4611	YIL068C
chrIX	235640	237818		16.1217	15.3231	13.904	16.0225	15.0103	14.3643	12.4454	20.3188	15.174	15.2495	15.5628	14.3511	YIL067C
chrIX	238015	240755		5.48277	5.02719	9.32004	4.76735	4.8492	4.26883	20.8972	41.5374	4.93089	4.67498	4.98961	7.56	YIL066C
chrIX	241232	241865	3_MSN2	16.6685	14.4306	20.47	16.442	15.8471	13.3294	22.6496	33.7839	17.5073	15.0959	15.3	16.9794	YIL065C
chrIX	241942	242796		30.4765	30.5738	30.3915	35.2445	34.4191	31.8143	32.0215	31.7	33.4676	31.799	27.6998	33.8079	YIL064W
chrIX	242724	243791		46.2432	43.9927	47.4507	46.9104	43.3396	43.7338	46.9734	50.0983	48.4481	44.9404	47.3644	43.9688	YIL063C
chrIX	243916	244499		62.5709	60.3733	64.2563	58.9988	59.098	60.2366	50.7107	61.1496	69.6735	61.9585	61.5016	62.4205	YIL062C
chrIX	244446	245577		25.5317	26.2654	25.3145	27.5238	26.0008	25.4205	21.3423	26.5718	27.2449	26.3332	24.9971	24.0186	YIL061C
chrIX	246276	246540		4.94894	4.34955	4.90917	3.8689	4.19788	3.33492	4.76489	8.35784	3.95773	3.45258	3.04254	3.89299	YIL060W
chrIX	247900	248468		3.67775	2.92937	3.40592	2.87465	2.05702	2.13083	4.91882	6.24588	3.11428	2.9296	2.12576	2.12347	YIL057C
chrIX	249652	251971		52.8166	54.3666	62.6974	46.7351	50.5612	51.7888	59.1933	44.0702	54.5217	55.4995	51.6992	54.128	YIL056W
chrIX	255081	256027		375.975	391.315	365.733	316.241	418.721	406.122	269.581	172.388	435.079	404.736	382.882	350.482	YIL053W
chrIX	256176	257093	2_RPG	312.115	298.991	72.4847	275.817	334.932	319.915	63.6216	48.359	293.159	311.658	294.323	281.144	YIL052C
chrIX	257725	258368		155.464	144.229	110.987	115.596	135.365	140.197	84.4712	65.5496	151.847	142.313	134.395	118.228	YIL051C
chrIX	258792	259789		44.5888	41.8342	40.539	39.28	40.0411	40.3311	43.5805	32.9852	39.0473	39.3564	40.4118	39.3314	YIL050W
chrIX	260151	260989		36.2752	34.6094	29.3795	31.7799	33.9843	32.031	26.2067	24.0335	21.3229	30.9879	28.6492	32.5578	YIL049W
chrIX	261131	265018		34.1036	33.3946	39.1844	30.4049	32.5483	32.6329	36.9493	39.6979	27.9079	32.9541	34.3766	32.5643	YIL048W
chrIX	265030	267860		61.3137	66.3654	51.6688	63.1748	65.3767	65.8217	46.0009	49.844	75.1248	65.5668	67.6196	62.0158	YIL047C
chrIX	268650	270682		35.6396	31.9004	35.7339	34.021	33.4631	31.054	36.0911	50.1242	41.4609	32.6392	33.759	31.9805	YIL046W
chrIX	270879	272781		11.9269	11.1772	12.5264	11.1489	10.4416	10.4048	14.3658	22.7503	8.72526	11.4987	10.3592	11.2587	YIL045W
chrIX	272834	273871		31.1402	29.7122	32.1804	28.2916	31.1049	29.3799	33.6121	40.7039	31.4198	30.238	28.8786	28.3811	YIL044C
chrIX	273968	274969		47.0192	46.3418	44.7948	46.5738	45.6759	46.8701	36.262	44.0448	52.0149	47.3409	42.9145	43.6496	YIL043C
chrIX	275057	276342		27.9807	27.6688	29.3108	25.8931	24.1347	25.8066	33.1833	47.5647	32.7479	25.7377	26.6817	25.3898	YIL042C
chrIX	276483	277592		47.921	46.6303	53.1556	46.0435	44.2595	48.8489	52.8886	68.2254	56.4437	49.4882	46.9587	48.8519	YIL041W
chrIX	277687	278245		54.0596	48.8352	43.9506	50.3848	50.0895	49.6887	37.9763	35.79	37.5189	53.1651	45.1836	49.0467	YIL040W
chrIX	278373	279994		26.5986	24.0576	23.2821	27.3482	23.419	24.2401	22.7691	35.5948	23.8097	24.43	23.3709	22.6017	YIL039W
chrIX	279979	282894		40.4847	39.6101	40.6356	42.7415	40.172	40.9281	38.9298	41.415	39.1369	40.53	40.447	39.9389	YIL038C
chrIX	285482	287538		37.5153	35.468	45.5565	33.1379	34.2356	33.8011	54.7608	64.7445	35.1401	33.3554	35.2761	34.5158	YIL036W
chrIX	287437	289060		47.4242	45.4015	43.6235	44.5225	48.7025	46.4097	53.6128	52.6948	35.6307	46.1295	45.1157	46.2503	YIL035C
chrIX	289152	290141		60.1418	56.9817	57.7048	52.9042	54.1688	58.1336	57.7855	61.4644	57.742	56.3851	54.3456	54.0827	YIL034C
chrIX	290239	291776		40.7183	37.7965	46.0979	33.8198	36.2987	37.582	60.5291	70.0939	44.759	38.1241	38.4233	38.4111	YIL033C
chrIX	292462	296135		25.9003	24.0489	27.9277	26.8659	24.2965	25.5197	35.299	39.6878	21.2875	24.4923	24.1574	25.8308	YIL031W
chrIX	295964	300057		44.3435	42.2557	56.832	42.4552	43.2121	41.7903	43.9638	56.7069	40.3827	41.986	42.8132	45.3552	YIL030C
chrIX	300450	301361		11.78	11.686	11.6331	11.2448	9.88175	11.4513	15.2852	18.5234	7.51374	11.1212	9.75789	11.5501	YIL029C
chrIX	303592	304182		48.0625	47.1324	38.5321	42.7785	45.7178	47.1358	31.2875	30.1411	31.1743	46.712	38.793	41.5335	YIL027C
chrIX	304335	307937		25.1311	24.2254	24.7716	25.8468	24.545	22.579	25.5992	31.5385	23.0561	24.0911	26.3022	21.5943	YIL026C
chrIX	308581	310462		27.6762	26.6773	34.8871	28.1118	24.7772	23.8466	26.5319	36.5178	31.1589	26.8923	24.9502	29.1202	YIL023C
chrIX	311046	312685		59.2952	56.8146	63.2643	59.0827	58.2452	57.4618	43.09	60.8374	72.0126	58.7462	61.556	59.4755	YIL022W
chrIX	312792	313994		57.8861	56.8475	55.2891	56.42	58.4094	54.716	43.8521	46.1741	57.9007	60.2135	56.3876	55.6581	YIL021W
chrIX	313915	314908		30.1621	29.9163	28.8194	30.8318	30.6296	28.7616	38.1717	38.058	26.7254	28.7295	27.8208	27.3378	YIL020C
chrIX	315057	316244		31.0302	34.1572	26.0393	41.3098	39.2985	32.8929	31.009	30.7883	33.1558	34.6264	27.3557	31.8513	YIL019W
chrIX	316725	318021	2_RPG	395.955	399.315	76.9531	374.974	421.797	410.668	43.7684	47.685	419.71	409.887	386.036	351.562	YIL018W
chrIX	317938	321041		28.812	26.1646	24.8921	23.6856	25.5588	25.5091	34.132	46.0765	24.1935	24.304	25.3224	26.1155	YIL017C
chrIX	321386	321992		119.337	131.749	93.4017	111.935	116.724	122.616	58.7046	46.8553	128.294	131.105	114.205	113.378	YIL016W
chrIX	322267	324105		84.1927	87.2416	43.6217	65.4436	77.3494	84.466	22.593	15.057	83.2255	89.5946	79.7653	80.778	YIL015W
chrIX	325114	325613		5.6392	5.58455	4.67772	5.33074	3.71557	4.91467	4.85174	8.30874	3.21481	4.68379	3.52401	5.13603	YIL014C-A
chrIX	325928	327998		27.8513	27.6453	28.1565	26.9849	26.1558	27.4295	23.0571	24.0956	22.6775	27.6951	25.114	27.0252	YIL014W
chrIX	328099	332555		15.2558	15.4679	22.6414	14.6623	13.224	13.7107	30.3885	42.0673	13.2753	14.4119	14.3233	14.8982	YIL013C
chrIX	333694	334609		6.85699	7.71868	13.8082	8.70038	7.6164	7.23885	30.098	44.7264	8.5668	7.51679	8.46979	8.56092	YIL011W
chrIX	334831	335709		22.6141	21.7138	25.0864	20.1541	19.7077	20.9444	36.4326	47.9267	18.7491	20.9046	19.2375	21.0625	YIL010W
chrIX	335516	336269		28.6832	29.9046	24.5706	23.7285	22.9321	26.4792	37.0186	37.9866	22.3138	27.1656	24.8723	23.8167	YIL009C-A
chrIX	339329	341632		64.3682	65.3177	57.0708	51.1369	68.2233	67.0536	49.554	31.4146	63.1453	63.8244	58.8593	62.4723	YIL009W
chrIX	342443	342961		30.5359	32.7662	31.6509	33.7228	31.909	31.8789	32.203	33.5373	25.2872	29.8062	24.4429	30.5847	YIL008W
chrIX	342832	343681		31.0797	27.8748	35.0896	31.8361	25.8577	24.8349	43.0487	72.2658	28.2819	27.1451	25.4291	30.4102	YIL007C
chrIX	344045	345352		26.1703	25.1124	28.9894	24.6329	22.6448	21.9426	39.9603	50.5185	28.5539	24.9756	24.8565	24.9373	YIL006W
chrIX	345558	347986		23.9579	21.4942	24.4662	22.9389	23.1426	22.2639	36.7403	30.833	19.8965	22.1502	22.1797	22.4893	YIL005W
chrIX	347883	348533		38.5185	38.252	39.3904	39.7483	36.4892	39.0882	47.6337	43.7764	34.4324	39.3097	35.8392	35.804	YIL004C
chrIX	349069	350090		25.7837	26.3714	30.9666	28.3785	26.2992	26.744	42.9136	41.3302	25.1014	25.5239	23.8293	27.236	YIL003W
chrIX	350272	350582		50.412	51.8865	45.1474	50.627	49.2113	54.4707	36.5842	31.829	47.7095	50.1466	43.2846	45.8945	YIL002W-A
chrIX	350438	353596		21.9119	20.0965	22.4458	21.5071	18.7103	19.5744	32.7799	30.6554	18.5983	20.0116	20.2867	20.7393	YIL002C
chrIX	353880	355576		28.7551	27.0064	28.259	29.6756	26.4505	26.4619	44.0334	47.9975	24.3492	27.3977	27.9104	28.5252	YIL001W
chrIX	355989	356979		28.4933	26.9033	26.6389	27.047	25.9157	25.289	28.2183	23.5358	23.732	25.9246	25.979	25.1925	YIR001C
chrIX	357327	360486		25.4253	23.7224	27.1092	27.4355	23.2724	23.5744	35.6627	43.8034	21.7534	23.3626	23.1916	24.0169	YIR002C
chrIX	360836	362996		30.7236	29.1038	32.7749	33.2437	27.2822	26.9674	35.1162	43.6014	32.4985	27.7222	28.3338	29.4884	YIR003W
chrIX	363167	364629		40.1504	37.3751	42.9615	41.6355	40.1325	36.0288	42.1114	38.4176	37.3927	37.0682	38.0432	37.1803	YIR004W
chrIX	364887	365402		23.2728	20.5208	20.6865	23.3333	20.6395	21.482	25.7516	20.8696	15.8771	23.1328	17.7421	22.4854	YIR005W
chrIX	365402	369968		42.3246	40.6715	48.5771	42.5893	40.3387	41.5409	40.6326	46.8944	48.5717	41.5512	45.0388	43.1014	YIR006C
chrIX	370608	373110		12.0966	11.3708	14.1774	11.2732	10.2247	10.2166	25.6231	28.3483	10.7296	10.9737	11.1056	11.1784	YIR007W
chrIX	373006	374364		27.6982	26.6517	28.0374	28.0472	25.0142	24.8473	27.1951	33.9408	25.6323	25.4045	26.5823	25.0129	YIR008C
chrIX	374446	375305		34.178	29.6659	34.3407	32.8767	28.2759	26.1024	28.0017	40.3225	30.828	28.9318	28.0342	29.0903	YIR009W
chrIX	375336	377289		35.0835	34.0683	33.8479	35.6485	34.3507	32.3872	39.5233	41.08	36.7113	33.4522	35.4092	32.1966	YIR010W
chrIX	377211	378279		46.4796	44.2573	50.8703	47.0728	46.1551	44.7822	51.803	60.4154	41.1479	43.5427	42.0055	44.8071	YIR011C
chrIX	378445	379906	1_RiBi	60.0566	62.8278	68.1688	74.2981	65.4132	66.0233	57.8888	66.5775	70.489	65.8471	57.2407	65.7111	YIR012W
chrIX	379929	380462		7.54636	6.45568	7.45448	5.73887	5.35413	4.92028	20.0875	21.1175	6.05979	6.80976	4.02983	5.6576	YIR013C
chrIX	381061	381833		51.7869	48.6189	53.5791	46.2437	50.9364	49.2744	62.8047	53.6117	51.5459	52.6161	45.4745	46.4942	YIR014W
chrIX	382586	383475		33.5376	33.3064	38.775	35.3383	33.0799	31.3984	50.9972	55.6291	44.1176	35.5663	37.0022	35.1783	YIR016W
chrIX	383397	384119		26.3491	21.458	23.6559	17.0078	18.2637	17.0403	32.6127	42.046	23.9696	19.8618	18.6757	18.7883	YIR017C
chrIX	384608	385822		45.4716	41.8106	50.4519	37.1547	40.713	39.6455	76.7262	57.3509	44.7286	40.226	38.625	37.2314	YIR018W
chrIX	389475	393745		9.84177	9.45824	14.8228	7.78031	8.99296	8.64131	15.7089	19.8023	11.3056	9.4463	10.2506	10.0843	YIR019C
chrIX	397241	398419		32.8536	34.3699	32.7033	33.2558	34.4189	32.7311	31.8474	29.2238	34.9248	34.1924	31.3303	31.9622	YIR021W
chrIX	398513	399338		34.3824	33.8694	31.0136	33.4669	33.3071	32.0618	28.3892	31.2928	34.3324	33.5952	29.8548	31.5178	YIR021W-A
chrIX	398674	399338		37.584	37.102	34.8035	37.5672	36.4907	35.8204	30.3121	33.0078	38.3081	37.4374	33.8612	34.738	YIR022W
chrIX	399747	402799		29.4779	29.1121	31.3109	29.3466	27.9448	27.7451	42.8691	46.0437	28.8936	27.5518	28.5772	27.1694	YIR023W
chrIX	402763	403534		26.8173	22.8345	30.755	24.7033	21.84	21.8294	40.6919	42.7206	21.0608	22.3668	20.6615	23.5109	YIR024C
chrIX	403641	404796		24.4883	23.9382	29.3905	26.9871	22.2513	20.1046	38.1216	46.6562	22.9299	22.4947	22.2164	23.8094	YIR025W
chrIX	404779	406006		33.6002	33.888	42.254	41.16	37.3783	34.7013	49.6249	49.4919	37.1617	37.1019	31.5252	34.7056	YIR026C
chrIX	411983	412809		11.8012	10.7048	11.7759	11.0091	10.362	10.2276	21.0654	19.3967	10.3576	12.2234	10.2427	11.482	YIR030C
chrIX	412960	414802		44.5011	42.0015	44.7887	37.4069	39.7692	38.4514	54.4707	45.2544	40.4761	39.4643	42.5555	38.433	YIR031C
chrIX	414905	415678		56.451	56.152	48.97	43.3188	47.7818	49.5831	55.6306	58.3541	57.5641	54.1046	46.618	46.3884	YIR032C
chrIX	416070	419567		44.8928	42.3305	46.6151	38.3753	37.4943	40.6304	56.2855	61.8204	35.9284	38.5671	32.2096	41.4917	YIR033W
chrIX	419542	420785		26.321	23.9778	34.7312	27.4714	22.3259	22.5783	57.8549	164.462	27.5436	24.8347	22.908	27.8077	YIR034C
chrIX	420961	421858		26.1599	25.5038	31.6449	28.4264	23.4017	23.2767	48.7666	66.8756	30.3961	25.3665	21.4211	24.3452	YIR035C
chrIX	422005	422921		16.7037	16.8301	22.678	16.2267	14.7618	14.2152	31.1373	47.0751	20.2029	16.7504	16.1791	15.254	YIR036C
chrIX	423024	423768		21.0586	21.3137	27.3493	17.6439	17.4215	18.4228	39.0686	66.3245	21.4309	19.3451	20.5168	20.7401	YIR037W
chrIX	423690	424542		14.4457	12.85	18.9756	11.002	9.97353	12.9212	32.0029	65.8064	13.0859	11.9586	12.7189	14.0522	YIR038C
chrIX	430321	432256		6.25007	6.65754	8.86401	7.05424	5.35841	5.66976	18.2958	48.579	5.58496	5.90516	5.86761	6.54521	YIR039C
chrIX	433720	434324		1.52308	1.16629	1.59227	1.47061	0.821606	1.05523	5.2594	8.37685	1.41252	1.19816	1.1595	1.48161	YIR041W
chrIX	434895	436051		16.4106	17.1499	17.2447	16.2663	15.918	15.8792	30.2546	36.8629	15.3355	18.0871	16.3208	16.101	YIR042C
chrV	13585	14644		29.088	29.0835	24.6021	25.9799	27.8371	28.1185	33.5517	26.6352	22.689	26.5932	26.436	25.5545	YEL072W
chrV	16287	17963		91.9068	76.9609	78.7929	71.5529	79.2183	76.2135	79.2625	144.359	90.2116	74.0412	88.5766	68.4824	YEL071W
chrV	19588	21233		1.32688	1.17256	1.20825	1.42471	0.957125	1.00074	5.63231	11.4237	1.03261	1.07234	0.831538	1.1968	YEL070W
chrV	21428	23231		6.8562	6.51028	8.83986	7.29588	5.63689	6.52298	12.0291	18.2287	6.85705	6.36141	6.44375	7.0092	YEL069C
chrV	25993	26970		17.6693	18.244	19.3572	17.152	16.0865	16.5996	22.9692	23.8047	21.1009	19.0609	16.2357	16.2946	YEL067C
chrV	27614	29619		39.6132	49.1755	33.8383	31.7973	48.4507	46.3665	40.0766	34.3565	41.3175	44.473	42.9301	39.3427	YEL065W
chrV	29692	31283		20.6145	19.353	19.5982	19.0919	19.5983	18.8462	23.1541	23.0002	15.5136	18.6118	18.2506	17.6176	YEL064C
chrV	31424	33721		58.2012	57.9886	58.6542	52.1178	57.8471	56.5664	59.5008	66.0013	56.5139	56.8397	60.8414	56.8584	YEL063C
chrV	36273	39632		29.3928	26.8939	28.4422	27.9732	28.8496	28.4452	33.847	29.7347	24.6264	27.1234	29.3672	25.9915	YEL061C
chrV	39810	42015		41.7297	38.4613	60.7978	42.5097	32.3908	36.7052	56.72	104.572	45.2925	37.1032	40.0994	45.9953	YEL060C
chrV	42343	42748		16.1587	16.1197	18.6898	15.955	13.1903	13.3399	16.0069	19.3868	18.0325	14.9722	14.0737	16.1741	YEL059C-A
chrV	43207	45001		42.303	42.5615	43.8896	42.4979	40.2662	41.4732	37.3034	41.7054	50.4789	44.3887	42.6441	43.8661	YEL058W
chrV	47089	48404		43.1938	40.8501	46.5352	37.8873	39.5961	40.7196	44.4259	47.7833	41.9945	40.4482	40.7672	38.2388	YEL056W
chrV	48397	51633		45.4295	46.6912	49.5931	51.0039	48.2994	47.9946	48.7849	45.9532	41.1625	45.7232	45.1635	47.0634	YEL055C
chrV	52480	53343	2_RPG	318.434	320.658	75.8794	290.705	347.323	341.083	48.1846	43.3907	350.042	330.866	301.337	290.648	YEL054C
chrV	53816	56169		24.3761	23.6176	19.1538	23.1801	24.0659	24.088	23.6961	34.8279	19.2518	22.7968	21.6866	22.4135	YEL053C
chrV	56535	58171		19.7837	21.0962	21.3564	19.8133	17.99	19.1553	27.6267	45.5085	21.6997	20.3912	20.472	19.2667	YEL052W
chrV	58306	59257		69.0564	73.8464	65.7805	63.616	71.5388	73.6225	73.6387	58.1456	67.7017	70.9154	63.3846	63.5379	YEL051W
chrV	59514	60945		36.2824	35.41	35.0662	34.3301	34.619	32.1672	38.0031	47.8558	37.445	35.3109	33.6375	32.3933	YEL050C
chrV	63712	64112		6.7434	6.29887	9.32038	5.62143	5.703	5.5326	11.1451	11.5024	6.2521	5.54727	4.92553	5.06722	YEL049W
chrV	64192	65193		33.7442	34.8964	31.2567	35.1588	35.5996	35.7812	26.0335	19.0677	25.8899	35.5169	30.2323	35.8988	YEL048C
chrV	65308	66818		26.4094	26.4154	28.4619	26.123	25.2428	25.3071	28.4643	37.6087	27.3771	24.1407	24.3338	24.2499	YEL047C
chrV	67046	68909		385.182	387.909	325.068	299.775	406.193	398.198	162.018	104.793	469.921	399.211	406.156	364.795	YEL046C
chrV	69727	70309		75.6506	75.9912	74.9566	62.1392	75.5856	77.279	46.2091	41.9097	90.7928	82.2165	74.1412	75.4161	YEL044W
chrV	70432	73462		35.9816	34.0375	37.8989	35.3092	34.1864	34.691	32.2491	41.941	36.2072	32.8113	35.079	32.7987	YEL043W
chrV	73557	75475		45.7299	45.4409	39.5676	43.9126	48.2522	45.9249	32.0315	31.2035	48.011	44.6331	46.5116	42.4725	YEL042W
chrV	78013	79500		256.992	265.725	236.574	307.664	263.833	262.799	154.372	154.764	277.421	274.293	271.949	267.357	YEL040W
chrV	79529	80065		32.2976	29.8767	46.2548	32.2017	26.8895	27.9357	79.7725	174.057	30.8795	33.2434	26.5324	38.5149	YEL039C
chrV	80410	81200	3_MSN2	18.8725	20.4273	34.0991	21.8919	18.9658	18.1495	40.9994	43.7955	22.8489	19.9121	17.9007	22.4709	YEL038W
chrV	81243	82805		67.3003	60.1162	88.3961	62.4201	61.0842	61.1711	80.7554	82.0563	73.8899	63.8973	65.4157	70.7441	YEL037C
chrV	82966	84696		59.6232	60.5962	68.2321	71.3823	61.4119	62.1332	56.0313	71.5303	73.7289	62.062	60.9141	64.2703	YEL036C
chrV	85582	86368		992.046	989.225	849.859	851.74	964.203	953.771	477.593	357.633	904.432	932.739	896.153	909.06	YEL034W
chrV	86885	89999		44.1764	44.9928	41.8934	42.9902	44.8976	42.5052	29.3033	37.9408	51.7237	45.1365	44.4354	44.8378	YEL032W
chrV	90221	93991		64.3837	64.1152	82.8446	60.9767	59.1618	60.3995	61.432	84.4148	60.8252	59.9575	64.0752	63.825	YEL031W
chrV	94221	96742		16.7344	17.0388	19.4449	17.5978	15.9532	15.7786	22.6772	32.8672	16.466	16.6322	16.2456	17.1303	YEL030W
chrV	96750	97860		28.3868	26.7246	30.6508	30.6387	28.552	27.6251	38.9731	43.6382	23.6943	27.1669	25.7753	27.0881	YEL029C
chrV	100698	101528		133.998	135.877	121.237	124.055	135.584	141.579	109.621	91.9765	135.935	135.788	128.32	132.902	YEL027W
chrV	101752	102395	1_RiBi	222.373	226.296	175.874	243.128	247.453	239.41	115.677	64.7064	209.077	238.967	201.871	218.776	YEL026W
chrV	102375	106186		31.764	30.1055	32.9674	30.2567	28.2237	29.6358	34.2782	41.5705	27.0794	29.1397	31.2735	29.1684	YEL025C
chrV	107145	108314		86.8108	83.1743	82.274	81.8694	79.1787	82.5578	71.1497	104.489	92.4952	90.8787	97.5341	93.599	YEL024W
chrV	108439	110552		13.5775	11.7267	14.7194	13.337	11.961	11.3884	19.3937	28.3241	11.3919	11.7735	12.3658	12.4126	YEL023C
chrV	111353	115877		30.1024	28.876	30.7298	28.6439	29.7769	27.689	32.6776	33.1737	24.2842	27.4985	29.7883	27.5587	YEL022W
chrV	116107	117031		722.156	760.662	503.198	641.007	734.525	711.536	294.306	317.995	738.488	722.465	797.073	643.586	YEL021W
chrV	117134	117591		178.139	180.392	132.83	140.601	168.357	175.14	127.119	95.1679	162.772	171.67	140.914	148.286	YEL020W-A
chrV	118514	120366		13.376	13.4586	12.9517	11.9839	12.9057	12.9074	18.2499	22.5272	15.2318	13.2465	13.3517	12.5922	YEL020C
chrV	120346	121310		13.7676	13.9475	12.4564	11.9554	13.0437	12.9501	15.6825	15.7219	12.832	13.7909	12.8685	12.8495	YEL019C
chrV	121436	122378		60.1337	60.1324	58.9638	54.4585	60.0071	58.0591	55.4606	49.8341	63.6975	56.3074	57.4762	54.9477	YEL018W
chrV	122380	123038		230.59	225.906	169.087	190.86	218.365	226.316	121.698	75.593	200.832	219.797	200.634	203.375	YEL017C-A
chrV	123615	124765		30.451	30.4008	35.4404	28.3971	27.7272	27.7291	46.1	41.7983	33.0614	29.2198	29.0824	27.5227	YEL017W
chrV	124521	126424		25.4602	24.1037	24.5976	23.0669	22.6313	24.1106	29.3266	25.4	23.1531	24.0086	24.5804	21.6921	YEL016C
chrV	126589	128340		52.2344	52.0319	51.7871	52.3922	50.3609	51.2707	52.4232	46.8784	51.3904	51.3734	53.6166	49.4595	YEL015W
chrV	128550	130745		31.6242	30.4914	31.2302	30.4522	29.0582	30.2739	43.745	39.7401	26.474	30.1543	31.2321	30.156	YEL013W
chrV	131620	132641		11.6387	11.2504	16.2681	10.0059	9.61189	10.0842	28.167	32.1826	9.92793	10.8959	10.1953	11.9882	YEL012W
chrV	133088	135348		25.0476	24.8144	29.6287	23.2926	21.9354	23.6601	46.0402	83.9762	23.8237	24.8353	24.4184	25.8251	YEL011W
chrV	138821	139851		494.495	488.995	327.066	431.888	494.005	493.336	246.724	214.546	538.889	492.147	499.217	459.425	YEL009C
chrV	141630	143924		102.803	103.259	72.1336	84.978	97.4219	96.5421	72.3079	71.7253	98.8653	97.992	100.506	89.796	YEL007W
chrV	144252	145927		41.2118	40.1357	36.8444	31.6686	37.7827	37.7732	40.1964	29.53	38.4489	37.5577	37.4916	37.5352	YEL006W
chrV	145823	146794		20.2051	18.9742	20.1027	18.0617	17.6957	18.1059	29.6578	39.4799	15.6858	18.3659	17.0781	18.7167	YEL005C
chrV	146893	148067		26.8603	24.4189	23.3049	22.199	22.7721	23.1157	31.9952	28.5589	18.3077	24.2041	20.9352	23.3117	YEL004W
chrV	148156	148724		41.7672	41.9408	43.8801	35.6662	42.6677	40.181	52.542	40.43	28.2337	37.948	32.0965	40.1158	YEL003W
chrV	148698	150089		46.0349	43.796	57.8586	42.9629	43.4488	43.2237	106.445	83.3714	41.5724	43.7158	44.0663	44.9494	YEL002C
chrV	150205	151016		38.2956	39.0991	45.5951	38.0797	37.7328	36.9574	62.201	61.3118	34.9537	37.7731	35.4417	36.1113	YEL001C
chrV	153403	155913		64.1296	64.8321	59.7186	57.1571	65.8072	64.2235	51.5984	62.8387	52.1353	59.2027	61.0783	53.6556	YER001W
chrV	156738	157588	1_RiBi	76.0598	81.4402	72.2938	84.8732	90.1296	81.374	60.6915	44.1913	71.5966	81.6652	70.9613	77.8969	YER002W
chrV	157655	159161		48.9822	46.3747	50.3185	39.2772	45.5379	43.8784	42.9918	35.4605	45.9467	43.4784	48.0696	39.1597	YER003C
chrV	159569	160516		54.5635	48.0596	68.5321	49.5047	48.9664	48.7002	52.0716	68.1016	61.2363	52.3344	48.4618	52.3437	YER004W
chrV	162683	164348	1_RiBi	71.5618	77.9153	75.7392	87.3389	85.3216	79.4649	66.6082	50.3086	78.4136	80.3705	69.3169	78.3565	YER006W
chrV	164505	166215		19.0312	19.9304	21.872	20.5296	19.3536	18.8189	35.9611	32.0535	13.3726	19.0262	18.2452	19.1525	YER007W
chrV	166047	166934		57.2714	58.4954	55.5147	60.3654	59.5538	53.4743	48.3917	45.8847	47.2232	55.7241	48.793	54.2018	YER007C-A
chrV	167739	171887		33.2058	31.9437	34.7154	33.1453	31.6926	31.5857	37.2088	45.6245	29.4705	30.5244	31.3966	30.1202	YER008C
chrV	172026	172667		74.5961	80.9659	70.5062	77.6203	79.1106	76.8042	59.5671	56.9674	65.001	76.9294	63.9311	69.8129	YER009W
chrV	172531	173366		21.7856	19.1341	24.9238	20.2088	21.6773	19.9848	30.2449	34.985	17.8756	18.8436	17.8563	20.7427	YER010C
chrV	175193	176168		5.33871	5.25254	9.62602	7.43955	5.85386	5.17675	18.1624	26.1807	6.59549	5.06473	4.92138	6.43599	YER011W
chrV	177748	178571		125.595	124.133	172.298	108.532	113.871	112.352	148.789	126.628	102.482	113.267	113.149	119.78	YER012W
chrV	178788	182346		22.6699	22.0856	25.6828	24.1338	21.1264	21.1543	38.9927	39.8025	20.2979	21.5345	21.9982	21.8173	YER013W
chrV	182545	184332		9.40006	9.68092	12.7672	11.4754	8.61212	8.48706	25.1151	32.8358	9.06461	9.19605	8.55693	9.88395	YER014W
chrV	184465	187028		14.7646	14.578	15.5205	14.6437	12.7393	13.6287	24.7211	33.2544	12.7824	14.325	13.0651	14.5974	YER015W
chrV	188187	189431		36.1262	33.5941	37.837	36.8816	34.5231	33.2115	43.6164	45.3131	37.5439	33.6029	34.7046	33.6282	YER016W
chrV	189430	191909		31.7181	30.7056	42.7298	31.5096	28.1099	29.2528	48.8008	60.1302	33.6474	29.9655	29.2522	31.6418	YER017C
chrV	191890	192711		56.3504	49.671	41.5774	38.4008	46.4699	46.4029	42.812	48.5186	58.4718	49.8439	40.1913	38.6454	YER018C
chrV	192796	194313		60.7962	56.9331	58.4882	45.1516	55.0736	50.8381	62.6639	60.1721	70.2795	53.7782	52.6569	46.5028	YER019W
chrV	194228	194627		112.588	121.494	97.5882	105.692	112.612	109.477	66.5751	70.8758	125.631	121.298	101.451	105.116	YER019C-A
chrV	195074	196693		29.2732	29.308	36.8926	28.8823	25.2556	26.0217	32.5346	56.4216	34.6776	28.9309	29.5915	28.8685	YER020W
chrV	196878	198650		85.0331	77.8873	107	75.9814	74.5838	74.7092	91.0887	100.985	71.1098	74.438	77.7144	81.834	YER021W
chrV	198775	200976		24.1186	23.4683	24.7142	23.7923	22.5189	23.0644	22.3513	26.1589	19.3381	23.0787	23.75	22.0356	YER022W
chrV	201022	202006		45.6891	45.6032	48.7449	43.8935	41.9719	42.2616	45.5178	51.429	54.253	43.9615	44.8452	42.5347	YER023W
chrV	202177	205080		27.4257	28.2319	32.9702	28.9705	26.243	26.8293	40.7257	46.6136	27.5741	27.1295	24.9799	26.3153	YER024W
chrV	205185	207096	1_RiBi	88.9197	92.7209	92.1788	100.27	95.6564	94.5023	84.0687	74.233	94.9974	93.5877	89.9128	90.3704	YER025W
chrV	207517	208564		60.4697	56.3286	67.7414	45.0469	52.2701	50.748	65.4262	71.5351	54.1824	48.3213	57.7417	47.2934	YER026C
chrV	208747	210354		26.6517	25.909	31.2751	23.1117	24.0103	23.9959	39.0082	38.3182	24.8545	24.5819	25.7374	23.8653	YER027C
chrV	210646	211987		27.9491	29.0742	32.9195	25.0218	27.9151	26.6825	44.1803	31.7964	30.329	27.9466	23.3335	26.4526	YER028C
chrV	212474	213247		36.5302	34.1341	45.3848	39.8886	34.4718	35.4153	58.4075	54.7247	37.4463	35.1427	37.1004	36.2054	YER029C
chrV	213348	214024		41.991	41.3192	48.9577	40.9953	36.437	37.5264	52.5475	63.0887	38.3992	38.5985	38.7544	37.8362	YER030W
chrV	213930	214788		47.7681	46.4388	56.8947	47.2517	44.4999	43.4008	65.8872	73.4042	46.4295	45.502	45.0875	44.0174	YER031C
chrV	214969	217957		29.6356	28.607	38.494	30.3686	28.1785	28.0958	51.5475	47.2327	27.2653	28.1515	28.3869	27.818	YER032W
chrV	217885	221511		12.4358	12.2975	20.0739	14.6012	11.5294	11.8899	37.1561	42.3198	11.2681	11.7029	12.2646	13.9805	YER033C
chrV	222565	223206		69.5567	66.1211	125.499	58.6928	57.4841	61.793	197.339	121.938	71.542	61.5556	63.0389	75.8813	YER035W
chrV	223259	225237		122.573	126.735	131.658	127.585	131.386	130.855	178.895	114.936	132.021	126.877	124.014	123.999	YER036C
chrV	225777	227075		23.834	24.6399	33.7219	27.1154	18.2839	20.9024	58.7752	69.3588	16.7101	19.9981	21.4755	25.5413	YER037W
chrV	229707	232243		26.6334	25.8864	32.8679	28.3105	25.9437	25.4545	48.9219	65.6539	28.0141	25.8774	27.1164	27.0408	YER040W
chrV	232378	234904		19.0456	16.7718	20.1788	17.4253	17.0064	16.1628	25.7575	21.8799	17.4954	17.4343	16.5663	17.4762	YER041W
chrV	234844	235655		41.4834	32.5801	48.889	27.566	33.8913	31.9796	57.4877	42.5027	29.4373	31.2231	29.8359	33.2057	YER042W
chrV	235550	237202		179.263	184.772	182.955	176.008	187.067	186.665	169.047	129.942	209.902	191.154	186.844	176.43	YER043C
chrV	237448	238155		65.6246	72.1519	85.0544	66.5009	60.1927	65.9605	125.601	96.6501	51.5267	61.9321	58.1337	63.513	YER044C
chrV	239854	241576		12.5547	13.4198	21.8524	20.0465	12.4465	11.882	39.2166	47.6744	12.5621	12.327	13.5268	14.9629	YER045C
chrV	243776	246690		24.0139	24.7685	29.638	26.5521	25.12	23.7401	52.8482	40.614	24.6502	24.0888	26.6956	25.4804	YER047C
chrV	246859	248258		29.885	31.0062	38.3261	31.3828	30.1062	30.8322	54.45	46.7644	30.4779	30.0546	31.6368	30.5832	YER048C
chrV	250621	251334		55.6369	53.6968	57.7839	55.6681	51.1791	54.7312	67.1803	61.6659	42.0184	53.3277	45.4546	52.1421	YER048W-A
chrV	251709	253742		50.5149	56.0768	57.1341	61.8505	57.3038	56.7036	82.0565	81.6036	56.7966	56.2154	53.7675	54.0246	YER049W
chrV	253862	254453		43.9576	42.7937	41.0895	44.0172	37.5247	42.0911	47.6076	49.3978	35.1018	39.4191	39.0918	38.9474	YER050C
chrV	254639	256290		17.5042	17.8992	20.4515	19.4906	16.2012	17.5226	27.8344	35.7023	14.7218	16.4739	17.5507	17.2152	YER051W
chrV	256262	258121		63.4547	60.2163	71.9327	54.7732	57.1819	56.8595	110.655	88.7274	60.8775	62.2891	63.02	66.5251	YER052C
chrV	258592	259736		24.0984	25.1829	34.8567	23.9605	19.7278	21.5813	85.854	114.985	21.6792	23.1946	25.8233	27.4212	YER053C
chrV	260715	261103		87.5145	103.107	111.64	156.263	77.151	96.7648	156.337	283.202	80.8869	111.197	94.6965	120.23	YER053C-A
chrV	261955	264140		19.1726	22.3345	24.3296	22.2478	19.7152	19.7272	41.2111	36.3869	19.5975	20.9008	20.6072	20.9595	YER054C
chrV	264758	265917		90.6405	93.214	57.8383	73.8333	81.1519	87.7693	59.8782	53.0027	88.789	93.059	84.9378	88.4953	YER055C
chrV	266397	268203	1_RiBi	143.829	150.51	128.379	135.552	162.189	157.348	92.1822	87.1997	149.899	151.75	147.225	141.637	YER056C
chrV	269342	270216	2_RPG	280.439	276.72	64.774	262.284	295.624	292.207	43.0314	43.1505	265.361	286.662	262.34	253.549	YER056C-A
chrV	270646	271205		65.7992	68.7776	20.4179	63.4952	64.8664	70.9045	19.9365	32.5742	68.4422	66.8717	56.215	60.1425	YER057C
chrV	271705	272237		29.0522	27.0266	24.4727	25.9264	27.0575	24.8463	25.9457	42.6394	29.3481	26.2026	26.8126	25.0428	YER058W
chrV	272441	273977		30.3096	30.5569	29.1109	25.7404	26.8019	28.0636	29.9311	30.9165	26.5752	28.091	31.0247	27.3686	YER059W
chrV	274421	276310	1_RiBi	29.9415	31.0096	35.8694	29.6729	29.6637	30.985	31.4192	34.1764	32.6216	32.292	33.3925	30.1152	YER060W
chrV	278244	279665		15.0206	15.5671	18.2693	17.8129	13.8934	15.0524	18.2549	22.2068	16.8196	16.0949	14.9056	16.5766	YER061C
chrV	279755	280747		22.4849	21.7792	29.094	23.9039	16.766	20.3693	52.3761	94.3448	23.3341	21.212	18.7681	27.4242	YER062C
chrV	281616	282514		67.9619	65.3186	109.767	57.568	60.0012	64.8648	100.237	111.978	71.6117	65.1501	66.4727	68.3292	YER063W
chrV	282446	284362		143.884	146.862	147.11	144.336	143.386	152.709	84.2918	111.226	142.814	145.105	159.922	143.244	YER064C
chrV	285123	287181		53.0255	52.9925	67.7779	47.5583	51.7617	55.0352	57.7555	60.2266	62.218	54.8794	55.7527	55.5649	YER065C
chrV	291837	292643		26.8478	27.7264	46.1784	19.0241	19.6747	25.363	55.6088	102.577	23.0078	27.1346	27.071	36.4078	YER067W
chrV	292929	294929		47.0148	46.8394	46.8404	45.3554	45.449	45.0021	46.5546	57.2813	46.9272	46.1532	47.974	47.0793	YER068W
chrV	295336	298121		24.6763	25.4723	24.616	25.4803	23.6474	24.1888	30.5746	34.6692	27.4253	26.8286	24.9174	26.7471	YER069W
chrV	298871	301821		189.183	179.85	187.706	165.613	192.432	180.34	205.642	158.017	181.804	173.928	200.642	175.539	YER070W
chrV	301722	302378		69.9044	63.2259	54.2301	53.6078	59.5833	59.3744	70.3509	44.0422	42.3504	57.0031	50.5596	59.2531	YER071C
chrV	302697	303339		217.308	230.368	152.79	209.756	201.844	210.501	124.281	66.6502	191.402	199.097	178.073	185.932	YER072W
chrV	303579	305867		140.602	143.647	112.887	122.134	141.456	138.779	86.9642	38.3709	146.582	139.077	152.204	129.288	YER073W
chrV	306296	307294	2_RPG	321.713	332.467	75.0267	322.903	357.718	344.523	53.3915	55.0288	326.11	337.151	330.97	302.376	YER074W
chrV	307583	308214		39.6608	36.4752	30.869	37.6326	36.8648	37.479	34.3393	30.8177	29.3101	36.4797	32.2501	36.0442	YER074W-A
chrV	308348	311365		32.7302	32.3103	40.689	31.0972	32.9304	31.9503	55.2224	39.7343	30.6489	31.0434	30.0808	32.4366	YER075C
chrV	312297	313637		14.2467	13.6266	15.1522	13.8169	13.2872	12.9262	19.0689	17.244	15.3722	13.1933	13.0436	12.851	YER076C
chrV	314548	316600		25.1815	25.2645	24.1729	27.5051	23.4967	24.9716	24.9857	20.7519	20.9643	23.9036	23.3512	25.3872	YER077C
chrV	316701	318575		25.3135	25.0887	29.7582	26.27	23.7008	25.0488	34.5002	33.297	21.2048	23.2286	23.1415	23.8334	YER078C
chrV	318840	319851		14.6917	14.0459	15.6127	12.1889	11.9785	12.457	22.088	30.5316	12.6291	13.7331	13.8428	12.9898	YER079W
chrV	319917	321928		28.1989	27.7926	32.5571	26.2194	25.7931	26.4013	35.9182	40.1289	24.5233	25.9261	27.7051	26.5863	YER080W
chrV	324179	325998	1_RiBi	41.4789	44.097	49.4062	53.4866	48.3058	46.8411	68.9473	42.0193	45.864	45.3721	42.4022	46.5019	YER082C
chrV	326129	327075		40.3356	41.2484	41.2373	42.9887	41.1566	40.57	38.6955	38.7054	47.7018	41.6999	39.356	40.089	YER083C
chrV	328367	330348		42.9956	43.3313	45.6969	46.2986	45.2422	45.0239	47.2657	53.7905	45.265	44.7471	42.7666	43.6291	YER086W
chrV	330529	332376		20.7809	19.3609	21.9964	21.3265	18.1379	18.0155	33.1602	36.1364	18.2835	18.6821	18.9073	18.1714	YER087W
chrV	332372	332876		72.362	73.7058	69.9809	68.2522	70.1441	72.7564	51.0703	43.6065	67.228	73.6591	66.995	67.0883	YER087C-B
chrV	333040	335355		45.9393	51.6499	49.9803	51.3797	47.8182	49.7942	56.53	67.3494	57.0918	50.7078	49.0957	50.6525	YER088C
chrV	335871	337691		47.9136	46.6407	49.5554	42.6434	46.5234	48.4588	50.8945	61.0566	55.7992	47.8752	47.2524	48.2153	YER089C
chrV	337855	339560		35.457	36.0868	36.8478	37.6493	36.7662	36.1406	36.2546	52.2261	35.3157	35.115	35.693	35.4536	YER090W
chrV	339637	342236		165.085	119.157	111.924	95.8083	130.535	126.039	52.6459	95.6366	172.209	116.712	157.474	122.223	YER091C
chrV	342815	343431		61.4761	63.5064	69.9272	58.1927	57.1628	60.7795	63.6727	53.831	57.3084	62.2818	59.185	58.059	YER092W
chrV	343260	347667		18.2777	17.9931	25.92	19.7895	17.6872	17.712	39.3251	35.8591	16.4644	17.2655	18.6473	18.527	YER093C
chrV	347787	348441		30.5045	31.5629	38.7476	30.9074	28.8344	29.8299	50.6226	43.6407	30.5368	32.2675	30.0228	29.6951	YER093C-A
chrV	348573	349455		67.4218	67.9563	104.009	70.199	63.2549	66.0008	66.8045	74.162	79.1444	66.9387	67.7901	75.628	YER094C
chrV	349912	351380		53.5806	49.8542	67.7947	65.9767	53.4332	49.2651	53.6475	63.8115	69.2139	53.7657	62.574	55.9332	YER095W
chrV	351613	353452		3.54696	3.50493	7.96801	4.12331	3.34552	3.29793	24.8016	21.5673	3.19617	3.42306	3.25929	5.16209	YER096W
chrV	355283	358056		11.6105	10.9839	17.2998	10.5542	10.1693	10.3919	31.5772	25.3695	9.12587	10.271	10.5571	11.6343	YER098W
chrV	358030	359105		33.3731	33.1812	35.1317	38.0846	33.7494	33.1491	34.9972	36.5927	31.3371	32.8132	31.4208	32.0909	YER099C
chrV	359275	360408		37.4685	35.186	33.389	34.1012	35.9756	34.8846	35.9425	46.9979	36.6222	34.7977	35.4189	34.334	YER100W
chrV	360285	361827		14.413	13.2995	13.3286	14.6638	13.3936	12.7465	21.8523	27.3597	12.9046	13.337	13.959	14.2437	YER101C
chrV	362732	363767	2_RPG	372.079	388.287	98.2528	391.859	415.203	415.036	78.4741	56.8654	404.885	405.402	409.144	363.903	YER102W
chrV	364534	366646		18.3583	16.8256	150.841	21.8919	17.0431	17.5932	399.153	191.319	21.5	16.9329	19.9709	47.9275	YER103W
chrV	366767	367810		28.402	30.0503	38.728	30.7341	28.4023	26.6465	70.4425	36.8925	30.1441	28.5526	29.1805	29.2361	YER104W
chrV	367712	372033		29.0033	30.0177	35.7739	32.1072	30.5757	29.8122	38.9842	35.2388	27.1448	29.3732	30.799	30.6142	YER105C
chrV	373339	374720		33.9382	34.6269	36.3051	37.1061	36.406	35.7097	38.4952	49.1849	34.4799	34.2365	37.2404	35.0385	YER107C
chrV	375027	377804		19.819	21.5472	23.3051	23.6321	20.8632	20.6114	23.8012	39.6804	22.7115	21.1512	23.0724	21.218	YER109C
chrV	378608	382243		46.9138	56.0811	56.1034	59.4706	59.1312	58.0311	58.7378	44.2698	56.6382	54.5373	52.4627	56.8518	YER110C
chrV	382508	386194		26.5674	23.5727	26.5413	23.4322	24.2085	22.2105	32.1491	31.9932	19.0804	22.7122	26.1618	22.7405	YER111C
chrV	387130	387895		37.4029	37.8342	36.6506	36.6958	39.577	37.0522	38.9109	37.9466	25.6279	35.1794	34.1878	36.8194	YER112W
chrV	387857	390209		31.4034	30.4468	32.6298	32.2838	32.4439	33.0987	32.8886	32.3958	29.1789	31.9274	34.051	31.3703	YER113C
chrV	390350	394016		23.8505	24.7127	25.6935	26.9572	25.4794	25.4896	28.5105	30.4231	27.0015	25.4577	26.6417	24.6931	YER114C
chrV	394177	395073		29.4903	27.5391	20.9826	27.5058	30.1083	29.484	22.3489	26.4056	27.384	28.1319	28.8768	28.6771	YER115C
chrV	394984	396271		35.7295	36.5101	24.3688	36.2146	37.4555	37.3644	26.5551	28.8763	36.4588	38.0929	32.0971	33.5272	YER116C
chrV	396645	397718	2_RPG	325.709	338.385	72.8463	331.645	367.684	358.544	37.9003	33.6099	328.003	350.355	339.819	311.686	YER117W
chrV	397771	399261		38.4764	37.604	32.912	38.5717	37.5709	37.3548	41.1944	35.1027	35.4235	36.3985	34.5787	35.2843	YER118C
chrV	399400	400875		28.1305	27.6079	31.107	27.8192	25.4242	27.0389	36.9494	40.6208	34.1053	26.7995	29.3123	26.6894	YER119C
chrV	401072	401973		59.8967	66.0402	64.4947	64.7003	67.7108	66.3289	59.1665	54.5649	79.0041	67.5624	69.4091	65.3838	YER120W
chrV	402752	404432		60.9135	64.8506	67.762	64.7671	64.7271	65.2767	54.6992	49.8358	64.1517	65.1333	66.5197	62.4111	YER122C
chrV	404615	406720		36.1602	36.482	37.7467	39.6317	37.1163	36.7758	35.4204	36.3232	31.3399	36.2878	40.3457	39.0342	YER123W
chrV	407030	409102		160.418	133.59	124.99	109.165	167.303	132.336	127.424	13.4036	121.869	126.364	153.082	123.171	YER124C
chrV	409684	413119		41.6734	42.9309	47.2414	43.2724	43.4476	44.6479	54.9365	46.3635	43.2148	41.968	47.33	44.5773	YER125W
chrV	413009	414275	1_RiBi	77.9205	82.6746	75.5828	95.8879	91.7983	88.0635	66.1694	45.7773	82.2211	86.502	79.5707	83.1754	YER126C
chrV	414450	415642	1_RiBi	51.5704	56.0715	55.7715	65.7442	63.5919	61.218	49.6318	40.3315	63.2337	57.5383	54.5003	58.6008	YER127W
chrV	415767	416596		27.3472	25.9105	28.4375	30.1645	25.8234	27.9394	28.7664	28.316	25.1952	27.9697	23.3699	26.2605	YER128W
chrV	416756	420949		29.3766	29.1906	32.6566	31.709	31.3534	30.809	34.6691	34.1385	29.6013	29.452	32.3233	31.4594	YER129W
chrV	420895	422541		45.8099	46.1538	42.8743	48.2408	44.5411	45.7472	50.1173	58.3304	42.0145	46.0196	44.7901	45.0434	YER130C
chrV	423590	424456	2_RPG	296.683	303.703	108.666	292.193	317.177	323.365	86.3119	50.289	300.969	315.7	313.972	291.402	YER131W
chrV	425053	430902		30.35	30.1302	29.9079	32.5449	32.5173	31.2081	36.7872	38.4033	32.102	29.7902	32.6221	31.6709	YER132C
chrV	432425	434187		83.5479	82.3289	89.2585	83.4095	85.6037	84.7095	87.7218	76.2148	73.7697	82.9216	87.6232	86.9297	YER133W
chrV	437014	437857		26.0849	24.1226	24.7263	25.459	22.9283	22.357	21.0115	20.1639	24.0586	22.9719	25.4456	23.2499	YER134C
chrV	439470	441297		35.073	34.5373	44.8291	32.2588	34.1491	33.75	38.0422	37.3338	29.9874	33.2738	37.5116	33.8718	YER136W
chrV	441204	441838		20.2175	21.7718	16.424	22.4488	20.4519	20.842	16.3149	13.8403	17.1235	21.338	15.4986	20.3387	YER137C
chrV	451506	453306		22.8793	23.0075	23.7787	24.7436	22.6994	23.7843	33.7157	39.9687	18.9066	22.4316	22.4445	22.2509	YER140W
chrV	453395	455117		32.3468	33.77	51.9927	42.8241	29.6704	33.8393	59.8307	77.9528	34.325	31.9912	39.3876	35.6558	YER141W
chrV	455111	456127		15.2473	13.1868	34.6677	17.2884	12.1686	13.7746	32.1216	52.4992	12.7527	14.072	14.885	19.5904	YER142C
chrV	456248	457715		34.5297	32.2921	67.3217	36.8154	29.8901	31.6845	59.0291	83.8548	34.1533	31.3347	35.9821	39.0739	YER143W
chrV	457691	460231		25.8674	25.2038	34.2519	28.1357	24.3225	26.114	37.6995	41.1698	24.9345	24.6297	26.7721	26.3012	YER144C
chrV	460423	461784		84.3943	105.047	73.0316	85.1398	103.681	100.455	43.6256	45.0372	109.696	97.6798	102.631	93.0938	YER145C
chrV	462529	462951		52.1532	51.5374	53.2535	46.3327	50.7653	47.4243	45.8487	37.2183	62.1159	52.5569	47.3764	46.3138	YER146W
chrV	462888	464842		24.7871	24.4614	35.7587	27.4386	24.3134	24.4256	51.7113	44.2844	28.4017	23.6229	24.431	25.5796	YER147C
chrV	465091	466215		62.3919	62.8225	68.3884	74.5427	68.9908	67.3985	62.1524	60.0845	65.1456	66.0758	69.6963	65.8761	YER148W
chrV	466081	467546		23.4143	23.4718	31.1119	27.5925	24.491	25.3946	28.1116	31.4572	25.2135	25.6797	24.7833	24.2783	YER149C
chrV	468334	468981		9.62558	8.22706	16.6461	11.0991	8.64017	8.17709	27.3414	39.574	9.5636	7.98889	8.96451	10.6931	YER150W
chrV	469619	472597		33.0575	33.7438	43.5961	37.3908	34.2739	34.5884	38.409	41.7439	35.2353	33.3652	38.1669	35.509	YER151C
chrV	472603	474018		29.302	25.5525	27.6477	22.4143	30.0137	28.4607	21.2749	26.2861	39.3499	27.9354	31.5498	22.8029	YER152C
chrV	474999	476295		57.9271	53.9563	61.1458	47.0474	58.5905	56.0709	38.8557	38.49	69.7357	55.3316	57.8992	50.0047	YER154W
chrV	476212	483117		45.3846	44.5107	45.4821	48.122	48.4016	46.7127	32.1015	33.7263	42.2184	44.9554	49.2081	45.2421	YER155C
chrV	483209	484356		82.0467	86.3617	93.2301	86.9235	89.7899	89.4896	54.8764	65.6856	108.83	92.9654	90.8379	87.1909	YER156C
chrV	484764	487229		23.6536	24.5543	23.9097	26.1947	24.9334	24.1543	22.9274	29.4955	21.3293	23.6762	25.0868	23.7099	YER157W
chrV	488755	490780	3_MSN2	13.3898	13.7902	18.7212	15.9932	12.8275	13.8117	23.0304	39.9448	15.0853	14.3892	14.7105	15.6887	YER158C
chrV	491387	492168		52.0623	54.2559	56.6401	59.8816	50.671	53.0355	46.8727	66.6079	50.7774	56.58	54.7889	59.4457	YER159C
chrV	499074	500394		34.437	35.2028	44.4551	40.2115	36.1703	34.7846	33.4502	49.6579	37.085	34.9809	36.6197	36.6929	YER161C
chrV	500599	502931		15.0336	15.2466	18.921	16.7876	14.6178	14.4492	18.6896	32.7371	16.4917	14.7806	15.6554	16.5177	YER162C
chrV	502976	503789		26.4071	25.6455	34.8085	27.0389	24.0943	24.072	28.6851	57.8995	30.7968	27.1745	26.5251	27.2281	YER163C
chrV	505079	509923		28.4124	28.4135	26.706	28.6789	28.6341	28.8701	18.2515	22.7714	29.7737	28.1216	31.2395	27.2473	YER164W
chrV	510230	512258		118.793	123.599	108.048	132.034	134.015	128.658	57.608	73.3049	132.982	126.686	135.049	129.427	YER165W
chrV	512443	517544		27.9074	28.6338	31.597	28.2624	28.4189	28.8718	25.4944	33.1136	29.2711	28.7959	31.0925	29.4031	YER166W
chrV	517839	520783		34.7341	35.9621	31.8415	35.3853	38.8333	36.8161	26.833	34.5798	38.6152	35.6286	42.4641	37.6709	YER167W
chrV	520966	522725		28.0165	28.2254	31.1879	31.1858	30.297	31.5619	33.9735	37.0193	28.6734	28.5108	29.9251	29.216	YER168C
chrV	523087	525963		21.2756	22.6971	27.5866	27.6754	23.4079	23.6561	35.437	43.1567	25.2885	23.3053	22.1617	25.1656	YER169W
chrV	525912	526996		24.7503	23.9147	23.6264	24.7503	23.4565	23.6446	23.5507	25.4645	23.9891	23.0061	24.4585	22.7086	YER170W
chrV	526934	529537		24.607	24.1059	27.0553	26.6734	24.7303	24.8971	28.5875	32.5995	22.6324	23.7364	23.6868	24.3476	YER171W
chrV	529411	536077		24.07	25.0918	28.351	29.5683	25.9403	25.3171	26.6304	30.6514	22.5742	25.221	26.0102	25.6004	YER172C
chrV	536269	538342		20.8092	21.1425	23.2888	21.5795	21.269	20.4558	30.4953	33.8722	20.419	21	20.293	20.9732	YER173W
chrV	538319	539308		26.3148	26.4067	30.1483	23.9182	25.4642	26.6822	34.0525	30.1206	25.737	26.1412	26.8443	25.9038	YER174C
chrV	539300	540403		21.2814	20.7144	27.067	21.0724	20.8868	22.0354	41.6712	38.5386	21.9619	21.4075	20.6372	22.8076	YER175C
chrV	541647	545155		62.3219	63.4731	66.0097	59.9998	60.5716	63.9481	58.5466	58.6076	62.8316	62.1868	66.7174	59.797	YER176W
chrV	545555	546591		162.226	171.392	181.393	145.486	152.07	166.659	127.568	145.311	190.826	167.447	189.663	171.26	YER177W
chrV	546756	548213		52.5964	53.3651	62.2767	57.429	50.4259	54.224	64.7804	73.6845	64.0138	53.4064	58.0774	54.038	YER178W
chrV	552489	553332		18.1257	18.4663	21.2362	18.934	17.9752	16.9525	24.5925	53.2173	17.4251	18.8894	16.8303	18.518	YER182W
chrV	553251	554005		24.8713	23.3555	23.9337	25.5153	23.6653	23.3829	22.959	37.976	21.546	23.8107	20.9017	23.3238	YER183C
chrV	555965	559051		15.6209	14.5158	20.6567	15.823	13.7641	14.021	29.1591	33.1568	13.3104	14.4317	15.036	15.3302	YER184C
chrV	559317	560420		6.52307	7.39867	11.0499	8.45141	7.1862	7.02723	19.6071	25.5013	6.53723	6.75333	6.36044	7.53227	YER185W
chrV	561441	562817		23.1641	21.1484	22.8373	23.3144	22.3718	22.4975	23.1472	30.2262	22.444	23.2035	24.2979	22.7868	YER186C
chrV	568032	568925		5.9025	5.48002	7.6704	5.31125	3.1815	3.61894	6.80311	14.5408	6.65878	5.83954	7.07817	5.79048	YER188W
chrVI	6425	7664		11.4348	11.6703	13.7259	10.3184	10.34	10.6977	17.8285	16.8159	11.4373	11.7414	11.7209	11.8036	YFL062W
chrVI	9480	10335		8.28635	8.08663	11.1341	7.75016	7.96007	7.66839	17.468	23.0275	10.2258	8.94446	8.91215	9.39464	YFL061W
chrVI	11196	12396		8.10093	7.56997	9.06619	7.07621	7.5007	7.73078	15.0208	24.0088	9.87802	8.31398	8.90867	8.35362	YFL059W
chrVI	12897	14056		5.1458	5.17028	5.12574	5.25783	4.24364	4.64912	8.50053	19.8449	5.22345	4.92808	4.1856	4.96658	YFL058W
chrVI	20846	22825		9.34321	8.51505	13.6141	9.96441	7.49903	8.94516	14.4283	27.2079	9.8928	9.35462	8.85533	9.87197	YFL054C
chrVI	23367	25502		6.1811	6.30652	9.37741	7.00414	5.46982	6.03577	13.9574	27.0741	7.5002	6.24926	6.03394	7.53699	YFL053W
chrVI	28221	29829		5.07451	5.35467	8.50352	5.89636	3.95427	4.6231	20.6779	22.8708	4.89458	5.3933	4.66136	5.94181	YFL052W
chrVI	29875	30564		3.43594	4.04488	7.36109	6.21086	3.94318	3.34472	18.4221	22.1966	3.9664	4.09983	4.09289	4.45906	YFL051C
chrVI	32954	36271		19.1073	18.0914	21.2902	21.7878	17.7002	18.7169	26.5897	31.4717	18.0709	18.6941	18.7576	19.3942	YFL050C
chrVI	36771	38765		23.0836	23.4184	23.7347	25.2944	22.2449	21.6003	27.8895	29.5604	19.94	23.262	23.3656	21.9211	YFL049W
chrVI	38725	40226		28.1052	28.705	30.7792	29.3094	26.0826	27.3333	37.314	43.711	24.1029	27.0336	27.0553	26.9267	YFL048C
chrVI	40412	42630		23.983	23.4818	25.7039	25.1377	23.2276	23.4155	32.6889	28.943	23.2271	22.3824	23.113	22.5852	YFL047W
chrVI	42744	43588		47.1066	44.7319	47.0308	41.5015	41.0655	44.2043	55.7483	45.2772	38.7719	41.4345	40.9996	41.5854	YFL046W
chrVI	43468	44466		123.31	122.744	119.553	104.25	122.318	118.482	116.611	88.8486	115.504	119.415	117.267	108.422	YFL045C
chrVI	44520	45597		76.5849	68.5107	81.0187	63.1332	63.922	67.2889	86.4955	95.5631	75.0496	68.3791	59.7467	63.3602	YFL044C
chrVI	45657	47776		19.2482	18.6122	23.5746	19.2796	16.6366	17.1683	29.8812	47.0208	19.5472	18.6613	17.4123	18.6587	YFL042C
chrVI	49116	51188		22.5325	22.6422	22.7186	24.7779	20.2375	20.7265	35.4792	31.0411	23.5719	22.4343	21.8635	21.7829	YFL041W
chrVI	53156	54902		236.635	232.279	236.385	205.478	225.141	235.083	179.036	134.188	261.912	232.044	242.319	238.925	YFL039C
chrVI	55259	56068		102.185	97.3758	104.67	89.5556	89.0096	93.5117	86.2636	101.427	106.369	90.9828	93.0275	90.7613	YFL038C
chrVI	56259	57935		55.748	53.3426	59.5122	56.4179	52.0745	55.433	52.1155	57.4097	65.0512	57.8638	56.9983	53.5015	YFL037W
chrVI	58533	62877		31.1708	31.3135	35.4082	32.955	29.3601	30.1693	30.0781	37.4861	29.9653	30.195	32.0498	32.6169	YFL036W
chrVI	62842	64056		44.4226	44.4027	38.4814	44.9788	42.306	41.4922	37.0361	38.8629	43.2235	42.8057	41.0187	40.3169	YFL034C-B
chrVI	64180	64973	2_RPG	361.499	366.832	79.4359	317.578	369.664	369.085	46.7429	52.6451	311.274	356.515	332.682	306.6	YFL034C-A
chrVI	65285	68817		18.0545	18.2384	16.8583	18.3485	16.9972	17.1219	18.7495	31.324	18.8575	17.9151	18.2709	17.615	YFL034W
chrVI	68792	74667		20.5204	18.8714	26.1467	19.9008	19.0009	19.553	28.685	40.0352	21.4428	20.1642	20.7225	21.0746	YFL033C
chrVI	75112	76563		181.117	187.717	180.32	131.413	161.859	168.902	142.511	120.402	193.26	171.899	172.395	164.768	YFL031W
chrVI	76707	78075		14.4393	14.4506	14.8023	13.1825	12.7158	11.6927	16.7271	25.513	15.8817	13.6476	11.7217	13.7297	YFL030W
chrVI	77986	79199		16.84	14.6584	18.3855	18.2871	14.1154	14.1531	17.353	47.9571	15.6599	14.894	14.3966	15.5583	YFL029C
chrVI	79268	80255		22.5296	23.5925	21.3022	23.6704	20.497	21.8568	24.2577	31.7095	20.2331	22.0901	19.9603	23.353	YFL028C
chrVI	80351	81931		28.6603	31.5747	30.7063	31.1287	29.6383	28.3493	33.8701	32.1866	25.4158	30.2332	28.4553	30.0434	YFL027C
chrVI	82549	84047		189.495	220.42	137.476	216.731	199.006	210.771	83.1261	83.0849	172.244	221.587	194.766	215.943	YFL026W
chrVI	83717	87312		36.5725	35.9731	36.421	37.7359	35.1815	35.7661	47.6017	40.4126	31.7618	36.5753	33.6672	35.7973	YFL025C
chrVI	87702	90618		61.9462	60.9488	48.4896	66.1169	59.2725	59.3449	47.4951	61.6882	56.7841	60.6753	57.3469	58.2421	YFL024C
chrVI	90965	93429		26.3791	26.9463	34.9352	31.5552	28.0838	26.2643	58.6604	54.8829	28.6279	26.9334	25.0799	27.4393	YFL023W
chrVI	93396	95104		64.7621	62.3324	59.6699	61.8436	63.0481	63.3877	56.6601	62.5452	74.8374	63.9534	63.8477	62.5938	YFL022C
chrVI	95965	97631		68.4706	63.6897	63.419	40.0287	63.9142	58.8072	59.0349	52.5232	77.3763	59.4079	72.5134	55.3655	YFL021W
chrVI	99190	99756		3.75578	3.02108	5.20731	4.60859	3.45777	3.34728	12.9846	16.6277	4.42122	3.7756	3.50256	4.69756	YFL020C
chrVI	101543	103229		38.4748	33.8657	41.8703	30.768	30.885	34.3042	47.1215	64.5334	37.556	34.7288	39.7201	34.7208	YFL018C
chrVI	103639	104003		29.1226	33.5528	28.5298	27.8359	27.1794	30.6414	29.4123	21.0439	27.4381	31.7676	25.5891	23.6095	YFL017W-A
chrVI	103783	104511		31.6613	34.1797	33.6573	29.8642	29.7231	30.1315	32.4477	19.5723	33.5871	33.8332	31.0015	26.1277	YFL017C
chrVI	104597	106320	4_HSF1	75.6931	67.5597	159.931	57.7915	61.0648	64.4311	221.158	139.552	84.9364	66.7891	78.4426	86.637	YFL016C
chrVI	107196	107810		6.73112	5.15244	10.8461	5.91603	5.1705	4.96533	24.8875	210.286	6.72741	7.01365	5.78992	26.1917	YFL014W
chrVI	107762	109962		30.995	29.7906	30.8012	31.0967	28.1258	27.9141	32.0343	56.3935	30.0597	29.1095	30.1419	29.3828	YFL013C
chrVI	112324	113985		1.91502	1.34426	1.83634	1.40034	1.04557	0.801505	8.09403	9.96391	1.36269	1.16551	0.949904	1.32372	YFL011W
chrVI	114945	115771		32.7544	29.8821	29.6732	29.6725	28.5287	29.916	20.2983	30.581	36.0095	31.2466	27.4781	30.2937	YFL010C
chrVI	115952	118571		24.1746	23.4525	22.291	22.4254	23.0866	21.9522	19.2209	19.3184	23.5565	22.3874	23.6658	21.651	YFL009W
chrVI	119375	123210		33.5958	30.0789	31.1286	32.8995	32.9403	30.1183	32.369	35.0806	30.0451	30.0122	33.7042	29.7655	YFL008W
chrVI	123336	129988		29.9041	28.7352	45.3753	30.7244	28.0823	29.0888	35.6654	45.7847	27.7894	28.4304	27.9131	31.8211	YFL007W
chrVI	130121	131199		64.2306	56.8718	54.1724	52.0906	54.0635	53.6142	52.1351	47.6564	52.9512	53.4634	50.7184	52.1347	YFL005W
chrVI	131666	134372		44.2053	45.5438	35.4325	46.3338	43.5827	43.0764	31.065	30.203	37.8619	41.1321	40.3708	40.2514	YFL004W
chrVI	144985	146946		35.2775	36.7226	36.1829	43.4829	38.6469	39.6092	45.0447	42.7458	33.8862	37.1303	33.8803	36.0882	YFL002C
chrVI	147092	148493		38.8992	41.2806	40.815	43.393	40.7965	41.4713	48.3092	50.3422	38.051	39.878	38.544	40.1095	YFL001W
chrVI	149028	149819	1_RiBi	58.3946	61.5143	60.261	69.0295	67.1485	67.7474	55.3225	41.2743	51.8009	65.4699	48.9509	59.3456	YFR001W
chrVI	149985	152618		41.2522	40.9943	41.2911	42.8521	40.2778	41.3683	53.4943	48.2475	32.6046	40.2146	38.826	40.6449	YFR002W
chrVI	152519	153192		44.3584	41.4493	56.9151	40.6159	35.4876	37.6416	55.3001	81.6434	40.5495	36.3285	33.0358	41.3938	YFR003C
chrVI	153343	154372		84.7722	78.5626	114.442	81.743	77.0378	77.8916	111.767	139.067	83.7204	79.9994	75.1796	83.3206	YFR004W
chrVI	154317	155916		48.6747	48.4838	45.8377	43.4953	47.5113	47.5196	50.6127	42.8945	40.7249	45.7688	43.8685	44.0545	YFR005C
chrVI	156104	157842		39.8053	38.0162	43.2688	35.2438	35.2192	37.4859	49.1119	46.7501	34.8425	36.209	37.7592	35.8611	YFR006W
chrVI	159278	160428		24.9022	22.0658	26.2567	22.8311	20.4297	21.4866	28.519	35.5058	21.3732	22.5258	20.4419	21.9964	YFR007W
chrVI	160491	161539		16.0697	15.1421	16.8631	16.1126	12.2976	13.3349	20.1772	23.7894	11.5069	15.0041	13.7515	13.8117	YFR008W
chrVI	162411	164939	1_RiBi	51.2432	51.31	50.0588	53.8198	50.2072	50.88	40.9886	37.5046	47.3945	50.6315	51.6414	48.949	YFR009W
chrVI	164984	166658		54.7305	49.9793	81.3141	54.9407	46.1028	46.8816	93.1611	140.429	45.6147	48.7967	50.7697	55.4117	YFR010W
chrVI	166527	167301		43.9261	42.0465	38.0618	36.7629	35.66	36.9684	41.6586	45.6679	30.9035	39.0518	35.135	39.5904	YFR011C
chrVI	169861	172360		25.4093	24.4034	26.6692	26.4912	23.906	22.6528	37.9673	42.1201	24.09	23.7409	24.4333	25.1813	YFR013W
chrVI	172343	173935		26.9489	26.1472	35.1889	26.6479	24.5826	26.2125	52.0137	43.503	27.8725	26.9366	25.2561	26.5069	YFR014C
chrVI	174127	176479		12.0157	12.9621	20.4509	10.269	9.65046	12.0208	51.8986	64.2685	13.7681	13.5116	12.7868	14.1673	YFR015C
chrVI	176990	180857		21.7135	20.5698	24.7413	19.7024	19.7641	19.5592	29.1356	26.3119	21.4413	19.8095	22.2967	20.5655	YFR016C
chrVI	182201	182938		5.61479	6.91589	10.2169	4.64007	4.30593	4.91585	18.4503	26.6094	6.92365	6.56049	5.77769	7.4027	YFR017C
chrVI	182988	184282		17.2632	16.4685	19.5977	16.4607	14.5268	14.9096	23.0681	28.1943	19.2664	15.9482	13.8942	14.7302	YFR018C
chrVI	184491	191389		19.4812	18.4845	22.8066	19.1858	18.0008	17.6891	23.5622	27.6092	18.3437	18.1135	19.3977	18.031	YFR019W
chrVI	194717	196425		25.7887	26.5706	26.1663	24.59	22.7981	23.2931	26.1591	31.6534	28.4781	24.8193	24.0795	22.786	YFR021W
chrVI	196545	199142		13.2208	13.0369	16.976	14.332	12.0554	12.2674	22.0319	27.3755	13.6588	13.0552	12.676	13.1132	YFR022W
chrVI	201808	203469		30.2992	29.2696	46.6641	32.4127	28.5184	29.4043	47.8896	73.6522	34.2559	29.7603	31.4757	34.5134	YFR024C-A
chrVI	203654	204789		26.9346	25.9137	27.4381	24.8098	22.3029	23.4976	35.7398	48.7752	26.7397	24.7853	21.9476	22.9627	YFR025C
chrVI	207376	208387		21.5591	19.1795	20.9405	18.0124	17.3802	16.8274	22.2966	25.5318	19.0004	18.6914	18.5881	17.0648	YFR027W
chrVI	208248	210135		39.5381	40.4823	37.5225	39.9316	39.0489	37.9319	33.8707	25.3832	43.1343	40.2104	40.0899	37.5251	YFR028C
chrVI	210872	213047		26.1172	25.0552	26.8233	26.3517	23.7678	23.754	31.5126	40.9087	28.0201	24.8346	23.2728	23.7259	YFR029W
chrVI	213257	216477		33.7453	28.8517	33.8406	28.2527	28.5181	27.9596	40.2396	44.3628	31.5559	28.1885	28.5594	27.3928	YFR030W
chrVI	216536	220150		28.231	26.5282	23.7853	27.5362	26.4006	25.0661	33.2661	35.6672	24.3795	26.0539	26.715	24.9256	YFR031C
chrVI	220346	221441	2_RPG	314.719	321.678	67.4446	301.055	329.031	326.062	41.5321	42.4916	362.807	330.297	318.317	279.472	YFR031C-A
chrVI	223160	223973	2_RPG	441.966	440.471	104.129	386.096	455.059	449.802	58.0791	47.2153	467.575	458.495	404.738	369.279	YFR032C-B
chrVI	223160	223792		493.376	499.846	118.716	445.009	512.535	511.25	63.1464	51.716	541.694	520.814	475.894	425.928	YFR032C-A
chrVI	224181	224889		159.392	154.734	164.107	130.278	145.836	152.601	170.621	195.957	190.299	162.836	170.196	155.74	YFR033C
chrVI	224790	225992		109.79	106.693	102.683	76.5794	101.047	101.436	105.704	81.507	130.908	104.875	98.0424	90.8738	YFR034C
chrVI	226940	227394		31.3979	32.0874	30.8529	30.4074	35.4568	32.7892	48.7521	36.5427	37.0717	32.0302	29.9059	27.514	YFR036W
chrVI	227393	229223		50.4007	52.2124	56.1687	53.2478	51.8009	50.7673	53.2723	56.454	64.7053	52.9209	55.7871	52.6911	YFR037C
chrVI	229379	232032		21.7526	20.2146	21.7461	21.5572	20.8369	21.0714	25.3705	23.4274	19.9037	20.1413	20.7547	19.6474	YFR038W
chrVI	231943	233685		25.3576	25.2644	23.6168	25.1305	24.2371	23.8033	25.6215	28.822	24.039	23.647	24.4742	23.6634	YFR039C
chrVI	233925	237351		51.9233	50.1329	58.8609	50.1649	51.4854	49.2103	65.6377	81.1468	46.206	49.2508	51.8636	50.225	YFR040W
chrVI	237272	238289		33.8448	31.2799	31.1544	28.4237	30.2673	29.4887	30.5187	35.4078	23.4335	30.3575	28.8297	28.3358	YFR041C
chrVI	238400	239147		27.5945	23.7416	27.017	24.4228	24.6063	22.5926	25.1707	32.916	18.2331	24.1368	21.4583	23.9276	YFR042W
chrVI	239937	241454		46.4023	43.6529	50.1639	43.3239	42.1723	43.7279	49.2515	69.244	50.5666	44.6288	45.2304	42.2604	YFR044C
chrVI	241981	243105		20.8753	19.4545	24.0364	18.3372	17.0438	17.4157	32.1416	46.3366	18.2734	18.3261	17.8151	18.3243	YFR045W
chrVI	243000	244159		24.3259	23.0356	25.5993	22.8176	22.5212	18.9299	38.5125	54.0741	20.9719	21.2452	21.3471	22.9462	YFR046C
chrVI	244200	245210		22.357	20.9818	24.3195	21.7204	20.5969	20.237	26.8919	46.5639	25.1962	22.5102	21.8486	20.7384	YFR047C
chrVI	246079	248171		28.3799	26.3334	27.1195	29.198	25.8374	26.1576	26.4194	41.1825	26.1592	26.0759	25.91	25.6264	YFR048W
chrVI	248336	249014		28.5882	23.9781	35.7647	24.2196	23.0855	21.2983	41.8242	45.5116	24.5004	23.2681	22.8963	25.3629	YFR049W
chrVI	248926	249918		73.1402	68.1958	106.064	68.6113	62.9667	63.8966	100.369	132.537	73.0312	67.6153	66.3888	70.499	YFR050C
chrVI	250090	251855		59.3681	58.3092	69.5873	52.6169	54.3608	56.1764	63.7951	82.576	66.5029	57.1001	57.5426	54.1225	YFR051C
chrVI	252464	253463		69.6032	66.8871	97.2955	73.3286	64.3555	67.2097	93.8823	149.237	63.1802	66.4397	66.2129	74.2414	YFR052W
chrVI	253422	255167		28.9544	30.4857	49.7745	15.911	14.3751	27.4628	97.6589	168.968	28.1115	28.1308	21.8302	32.9688	YFR053C
chrVI	264161	265614		97.2555	97.6361	79.027	85.6047	95.5572	92.0618	89.106	105.599	91.5326	86.9722	96.8182	78.911	YFR055W
chrVII	2777	4021		0	0	0	0	0	0	0	0	0	0	0	0	YGL263W
chrVII	6129	6670		0.366969	0.386285	0.726248	0.581386	0.381774	0.327745	1.31133	1.20863	0.414233	0.294898	0.37146	0.419131	YGL261C
chrVII	8231	9460		2.5298	2.9165	4.50084	3.06775	2.75175	2.15375	10.2726	21.1029	2.31428	2.55011	2.52717	3.1623	YGL259W
chrVII	12395	14320		24.7427	24.0546	28.4849	28.0103	25.5195	24.794	49.8536	51.4626	23.2485	24.2398	25.6661	25.8027	YGL257C
chrVII	14465	16480		43.8368	46.4847	46.2658	53.6744	49.473	48.7178	51.5756	78.3738	48.5503	48.8515	48.7803	48.8713	YGL256W
chrVII	20956	22198		28.1236	30.1026	39.0247	42.6597	31.1161	30.1244	57.6902	113.958	30.4291	30.2323	32.9824	29.8657	YGL255W
chrVII	22281	23787		35.9584	35.4145	47.533	35.9713	31.7134	31.7088	54.939	56.5465	36.7586	35.0474	30.398	32.5859	YGL254W
chrVII	23887	25583		221.017	231.845	250.12	183.712	220.34	230.727	282.701	177.609	242.324	225.443	246.382	223.295	YGL253W
chrVII	25625	27543		34.7235	35.0038	39.7828	35.4824	33.5015	34.5207	52.2477	52.1476	33.5538	33.8019	33.7788	34.6726	YGL252C
chrVII	31868	32831		12.8605	12.4986	27.0471	15.5708	10.8387	11.7458	54.6069	46.4536	12.3185	12.771	14.0806	17.3976	YGL250W
chrVII	35588	36818		25.8262	25.7371	29.6423	27.1068	23.8986	23.8913	43.2858	50.3055	24.9587	23.9249	26.0494	24.5877	YGL248W
chrVII	36912	37557		37.498	32.0847	35.6876	32.3984	30.6297	34.9733	50.1739	45.9986	32.5102	34.8123	32.771	34.5266	YGL247W
chrVII	37496	38819		33.8113	34.8781	36.3662	37.8835	36.9851	33.4376	45.615	40.1612	28.4682	33.4051	34.177	33.442	YGL246C
chrVII	38976	41211		58.8527	60.5618	60.6328	60.9241	61.4035	58.4508	54.2164	47.0281	62.3864	59.2147	64.8627	61.7914	YGL245W
chrVII	41422	43263		33.4793	34.1182	36.7405	39.7726	34.2399	33.7375	40.6929	42.7458	35.642	33.9433	37.6414	35.3025	YGL244W
chrVII	43306	44644		17.3516	17.5101	18.9207	19.8925	16.3428	16.8316	17.2694	22.203	15.4009	16.915	17.9411	16.5764	YGL243W
chrVII	44525	45264		28.0031	28.2339	25.3843	24.7395	21.7854	24.3375	28.1603	34.8174	23.6538	25.3616	25.4261	24.2612	YGL242C
chrVII	45412	48557		19.0065	18.8931	20.6043	19.2435	18.4039	18.5731	27.7758	29.819	15.3688	18.3644	19.117	18.2375	YGL241W
chrVII	48611	49453		25.3452	26.4861	42.7019	32.4489	27.6321	26.5069	45.7075	81.2374	27.2363	26.5825	28.0708	30.9083	YGL240W
chrVII	49508	52534		43.8146	45.3287	57.7163	49.6395	46.7841	48.8886	66.2291	81.5415	37.5242	45.1885	48.2174	49.4697	YGL238W
chrVII	52363	53611	3_MSN2	26.835	23.8674	30.5922	25.2305	25.3507	24.4077	35.5936	28.7162	25.6105	25.9654	25.8755	25.3878	YGL237C
chrVII	53740	55815		21.8438	21.4294	23.9001	23.61	20.9521	21.0294	30.7338	43.5827	27.1133	23.4973	21.478	23.2897	YGL236C
chrVII	56375	59001		42.4155	46.792	42.6514	50.1603	46.505	47.9001	42.5415	56.8559	53.8158	47.741	44.702	45.3388	YGL234W
chrVII	59075	61920		19.591	18.7262	20.9422	20.1995	19.7514	19.895	23.8265	20.837	17.3197	19.0063	19.0653	19.9873	YGL233W
chrVII	62044	63075		32.8974	32.5123	29.1831	36.4094	34.6086	34.758	33.9612	30.4309	24.376	31.1612	32.7461	32.0672	YGL232W
chrVII	63000	63639		39.0243	41.6956	38.9937	44.9453	41.6087	39.6981	38.2386	40.3338	30.3063	42.3859	39.5035	39.7102	YGL231C
chrVII	64341	67225		11.8473	9.87449	12.5747	8.96254	9.16182	9.25655	18.3212	24.541	9.12095	8.77316	10.2561	9.04553	YGL229C
chrVII	67543	69484		35.7749	35.1931	42.3734	38.4114	33.786	35.3716	53.1678	61.2484	38.5574	35.8907	38.8823	35.2426	YGL228W
chrVII	69619	72665		16.7466	15.1417	20.0515	16.5656	14.3532	14.9745	30.5135	37.0763	13.9298	15.2319	17.2164	16.2538	YGL227W
chrVII	72610	73234		48.1474	44.5923	44.0186	43.2842	42.8844	43.0389	49.9456	42.8156	34.545	43.8581	40.2663	39.8544	YGL226C-A
chrVII	73339	73812		37.9514	35.04	34.7996	37.5207	34.9554	37.5154	48.2973	45.9718	39.7755	38.1213	33.9853	32.442	YGL226W
chrVII	76774	78020		95.789	97.812	93.1221	101.427	101.37	101.348	101.627	86.3978	99.783	99.1276	104.826	91.3972	YGL225W
chrVII	77941	78958		32.3592	35.533	35.7592	37.1716	32.5697	33.453	55.3962	50.4756	29.3042	33.1638	31.9632	33.6071	YGL224C
chrVII	78970	80377		26.7946	26.8316	27.4743	27.6595	24.9547	25.5698	33.6572	35.1879	21.2967	25.2895	25.458	25.1099	YGL223C
chrVII	80599	81237		51.9474	58.8257	66.2683	59.3042	54.6221	56.4161	82.5921	103.038	58.2061	57.1921	56.8832	57.5742	YGL222C
chrVII	81347	82310		43.8092	43.1749	58.2334	49.5376	41.1483	45.0924	64.1865	77.077	53.7617	45.5615	45.0466	44.1663	YGL221C
chrVII	82373	82917		36.3779	38.1232	38.0329	38.8238	34.4138	36.7858	46.029	48.9044	37.0756	35.7034	33.2761	34.7347	YGL220W
chrVII	82792	84281		33.0361	34.1462	35.7833	32.7992	31.0655	31.5953	42.9202	51.7048	32.501	31.3091	34.1269	31.6095	YGL219C
chrVII	84631	87638		28.9787	28.4392	30.3919	32.1798	29.4173	28.6329	35.7318	52.1507	29.8639	28.3687	28.869	28.4766	YGL216W
chrVII	87598	89638		48.2874	48.6911	51.6759	56.518	52.5653	53.6292	54.3719	52.0491	45.6067	50.2542	51.7991	53.5199	YGL215W
chrVII	89939	91282		30.1047	29.8624	33.6821	34.2009	30.7764	30.9155	44.8276	56.1812	30.5922	28.922	31.1542	30.1507	YGL213C
chrVII	93751	94568		62.2205	62.1538	68.4103	50.9394	56.7684	57.3579	77.48	46.3829	61.2527	56.8877	54.0785	58.5232	YGL210W
chrVII	95728	97123		105.068	118.018	115.219	104.965	102.728	115.984	92.0436	61.9342	125.153	117.476	108.762	115.922	YGL209W
chrVII	97300	98715		22.2337	20.6807	25.5932	21.1153	18.6441	19.0116	34.4978	41.2174	24.7022	20.9053	21.126	20.0247	YGL208W
chrVII	98862	102207		53.6826	50.6074	72.4594	58.5805	55.483	52.3879	74.2523	74.2823	53.3118	51.7585	60.3089	55.884	YGL207W
chrVII	102253	107610		40.7065	41.396	46.0656	41.5167	39.4829	42.6607	42.0411	42.3368	39.6525	40.9329	47.4134	42.1174	YGL206C
chrVII	112387	114775		23.1401	22.8528	24.9247	24.6148	24.2392	23.7205	19.1385	20.6165	23.7982	23.6358	26.3263	24.4976	YGL203C
chrVII	115886	117630		47.6014	46.8478	47.1689	49.1575	48.0714	47.8937	39.5408	37.5542	51.6094	46.8662	51.5545	49.3019	YGL202W
chrVII	117651	120977		24.3496	25.1268	29.5622	27.4701	25.2323	24.8321	33.6914	35.8433	25.562	25.0474	24.7619	25.8788	YGL201C
chrVII	122586	123381		61.9778	59.8594	54.3354	52.3774	60.5779	57.0656	48.7083	21.7583	69.6533	62.7879	68.7008	56.5989	YGL200C
chrVII	123568	124348		49.8383	51.3032	54.7632	51.5415	48.5605	49.4374	47.3191	47.3216	65.7914	52.5739	53.9241	51.1408	YGL198W
chrVII	129817	131281		37.9406	36.1865	36.802	31.501	32.848	35.5323	45.6732	52.9141	35.4239	34.1223	34.0255	34.1136	YGL196W
chrVII	131481	139639		40.8494	43.0078	45.5992	50.3519	40.3978	41.5953	34.2269	34.5933	43.5744	43.2935	47.3154	44.6531	YGL195W
chrVII	139570	140207		26.4796	26.7382	24.6384	24.415	24.6759	25.4413	23.4236	17.8583	21.4905	25.6245	22.9599	25.7486	YGL194C-A
chrVII	140263	141777		37.3843	37.0451	44.4292	39.2843	35.8475	37.1741	55.2866	54.446	33.7999	36.8722	38.0355	38.9893	YGL194C
chrVII	142068	144079		45.7194	45.8882	50.8698	47.9482	45.4364	46.8192	71.4265	72.2632	48.0098	44.1613	50.8428	46.9092	YGL192W
chrVII	144677	145443		59.7937	60.1166	68.5056	60.304	55.1323	59.4516	70.0477	79.808	57.6932	61.7052	59.399	60.0784	YGL191W
chrVII	145534	147944		50.5219	49.3156	48.3144	49.9765	50.7079	50.876	72.6235	61.0691	43.446	48.9989	51.8223	52.7191	YGL190C
chrVII	148158	148966	2_RPG	338.419	340.149	111.278	333.312	368.867	373.285	94.2961	70.8896	347.972	348.89	346.382	323.786	YGL189C
chrVII	148603	148999		314.687	304.697	79.7876	281.088	339.832	360.073	68.5169	53.2284	246.483	319.232	267.568	296.318	YGL188C-A
chrVII	149401	150525		71.1608	72.9883	71.5674	59.3448	67.6967	72.9983	67.4517	53.2654	71.3345	74.179	90.0166	75.1698	YGL187C
chrVII	150993	152843		32.7306	33.121	32.43	32.9006	35.8376	35.5513	44.5657	47.8359	38.5038	34.5052	39.1991	35.6758	YGL186C
chrVII	153041	154340		27.5312	26.7033	29.4009	25.7883	25.5577	26.8394	38.24	48.0489	29.703	27.1875	28.2535	27.5326	YGL185C
chrVII	154502	156273		6.84024	6.61333	5.60196	7.37704	6.13661	6.47567	7.85488	16.3539	7.3828	6.006	5.96312	6.55314	YGL184C
chrVII	157852	159229		25.818	26.1067	38.9118	26.0124	24.1431	25.5583	48.9677	58.9718	28.5781	24.2945	27.5399	28.6528	YGL181W
chrVII	159875	163028		12.4863	11.6499	28.8796	11.2947	11.3494	11.7189	34.5064	46.8848	10.7999	11.597	12.7208	15.7073	YGL180W
chrVII	163314	165180		15.6103	14.3191	26.0066	13.3818	12.2883	12.8787	60.7048	61.2376	13.736	12.4125	13.0133	15.7308	YGL179C
chrVII	166870	171108		39.1391	37.148	51.4685	42.9256	39.4501	39.7809	71.7871	75.6679	33.782	37.3031	39.1913	42.6147	YGL178W
chrVII	174517	175446		26.7484	28.7478	44.2833	30.2464	27.0998	26.4987	46.4465	44.1532	29.1062	27.101	28.2512	28.482	YGL174W
chrVII	175486	180444		51.2366	50.8655	70.94	54.4576	52.0564	51.6642	54.205	54.5076	51.6935	51.1844	58.1425	56.1206	YGL173C
chrVII	180651	182213		37.1407	37.5746	46.8468	43.5578	39.4877	38.7736	42.2506	53.0361	43.02	39.5032	40.4522	39.6819	YGL172W
chrVII	182353	184171	1_RiBi	35.3834	36.6024	35.6155	47.9334	44.1805	42.1536	33.405	22.217	34.2221	39.6196	36.8917	38.6353	YGL171W
chrVII	185981	187545		27.04	27.3403	29.3634	33.0943	30.9021	30.3493	30.2068	28.6193	27.1197	29.4005	26.591	29.5964	YGL169W
chrVII	187468	190902		48.0294	48.5811	53.2893	48.4375	47.2997	48.018	52.4798	62.6623	45.8325	47.6628	51.0023	48.3131	YGL167C
chrVII	191107	191967		20.2335	20.5987	19.5352	20.9612	18.1664	18.3513	21.3182	28.1415	22.935	20.4245	18.9032	20.0128	YGL166W
chrVII	191890	193336		22.657	22.9278	23.4874	25.2332	22.3249	22.7511	18.8161	22.0488	22.9846	23.2083	24.1039	22.4143	YGL164C
chrVII	193570	196702		19.2276	20.0568	26.5844	25.5295	20.4484	19.0668	24.99	38.6224	21.1278	19.1053	22.6624	22.3649	YGL163C
chrVII	197976	199144		47.3111	46.6419	47.0749	49.1217	51.7153	47.0905	39.9471	27.1892	44.7911	44.8288	45.0455	44.1954	YGL162W
chrVII	199063	200250		32.633	31.4521	40.3901	32.5741	29.5553	32.2114	42.3745	44.3982	32.8559	31.2843	34.5352	31.9206	YGL161C
chrVII	200423	202407		17.2224	16.9825	20.1518	18.066	15.56	17.5391	24.4733	33.6541	14.3744	16.0942	16.9393	17.0797	YGL160W
chrVII	202697	203916		17.6417	19.2583	18.7148	19.4764	19.962	19.8394	13.2163	12.8845	13.9187	19.0603	18.6704	18.6593	YGL159W
chrVII	206881	208660		3.10631	3.4503	3.49491	3.25969	2.79404	2.60493	5.9135	8.14005	2.64822	3.22221	2.70825	2.92768	YGL158W
chrVII	208897	210142		33.2021	29.0567	35.6797	29.4056	27.8981	27.8573	36.3214	31.5235	29.3537	30.166	31.9151	30.9753	YGL157W
chrVII	210347	213726		21.0146	21.2068	22.9359	23.1408	19.2208	20.4113	22.2582	35.2605	19.0166	19.8137	20.7366	21.9158	YGL156W
chrVII	213941	215607		24.8188	25.0212	25.898	25.3246	25.5848	25.1108	26.9117	27.1991	23.3459	24.5573	26.9295	25.9462	YGL155W
chrVII	215275	216099		17.1301	18.8065	20.561	19.0451	16.3116	17.5328	25.4646	27.4112	18.2183	17.7394	18.2406	17.4514	YGL154C
chrVII	216218	217347		22.0034	22.6179	23.6639	25.4534	22.3779	22.1628	22.8527	25.6468	24.2025	21.5127	22.1803	21.2535	YGL153W
chrVII	217468	221015		24.4367	24.2939	29.075	27.272	23.8421	25.1884	29.7504	34.1349	19.9902	23.326	26.213	25.2769	YGL151W
chrVII	220939	225762		35.5978	34.473	38.7215	37.3649	36.4971	34.9771	39.1209	48.0668	35.8975	34.5918	38.8114	36.2894	YGL150C
chrVII	226294	227634		56.1813	58.6776	44.1981	55.5069	58.2038	55.9596	35.4484	36.2569	70.9796	58.6144	56.5513	58.4811	YGL148W
chrVII	227624	228375	2_RPG	401.229	420.492	170.763	391.088	425.694	424.582	99.8531	71.587	416.922	419.781	393.519	388.121	YGL147C
chrVII	228443	229773		46.9328	47.1626	27.7211	44.1461	49.1709	48.2532	27.5534	24.0456	48.4776	47.678	44.4813	44.1641	YGL146C
chrVII	230170	232468		20.2423	18.8899	18.4435	20.9083	19.108	20.2071	21.7055	21.8738	16.2147	19.0059	19.86	19.2468	YGL145W
chrVII	234643	235991		20.3677	21.1068	19.7202	22.1134	19.8054	20.1613	20.5607	23.3813	23.0461	20.4827	20.5594	20.5004	YGL143C
chrVII	236125	238163		17.6772	16.3608	19.4609	18.4197	17.1787	17.5056	17.1698	30.695	15.3257	17.165	16.7302	18.1187	YGL142C
chrVII	238310	241214		16.4869	14.4781	23.5271	17.5285	15.3389	15.5685	21.4844	42.086	13.9402	14.8637	15.6822	17.8856	YGL141W
chrVII	241109	245198		25.5311	26.463	27.8182	30.7636	27.6497	26.5776	21.7439	30.5548	26.3661	26.1935	28.4686	27.9033	YGL140C
chrVII	245401	248459		17.566	19.3757	19.2769	21.7182	19.3405	20.2159	19.3336	21.5603	18.6169	18.3388	19.8701	19.4113	YGL139W
chrVII	249844	252910		53.7821	55.0468	59.0948	57.3964	55.8679	56.4511	51.489	68.619	58.3958	56.7654	62.0262	56.6977	YGL137W
chrVII	252784	253927		36.7412	33.8339	33.0242	33.4943	34.4939	35.8427	36.3185	37.6738	31.2936	34.6533	34.2944	34.4239	YGL136C
chrVII	254517	255388	2_RPG	360.913	384.417	125.238	372.622	402.201	400.032	76.1377	63.8785	401.4	395.183	371.956	355.362	YGL135W
chrVII	255565	257072		35.8547	35.354	34.3498	38.7916	34.953	35.8735	39.5543	42.62	33.7068	35.5153	35.3167	36.058	YGL134W
chrVII	257505	261689		30.9613	29.9638	36.3615	35.9809	28.9713	29.7951	33.3309	44.4367	28.6906	29.4774	31.4909	32.2638	YGL133W
chrVII	261545	265930		18.6541	18.4713	20.7814	20.4649	17.1278	17.9722	24.6224	38.7696	15.7884	17.801	18.9017	19.4092	YGL131C
chrVII	266083	267665		22.2634	22.1311	25.21	25.0902	22.3171	21.8317	34.4773	45.1709	22.2369	21.9339	23.3398	23.6474	YGL130W
chrVII	267595	269188		25.2812	24.8043	27.9776	26.4052	25.1243	23.3311	32.5688	37.0049	21.9025	24.0721	26.2556	26.2922	YGL129C
chrVII	269149	270169		25.132	26.8375	27.2877	24.3045	23.696	24.0362	26.8204	34.7668	24.7608	24.7295	23.6737	23.6525	YGL128C
chrVII	270242	270840		38.9883	39.9996	42.6355	35.168	35.4848	40.0539	38.1219	41.3831	43.1908	38.5069	34.2194	37.9227	YGL127C
chrVII	270960	272395		29.1804	27.0155	26.8452	19.1412	23.6696	25.0302	30.0589	34.0903	33.4372	26.6314	23.3158	22.4958	YGL126W
chrVII	272377	274719		36.3973	32.062	35.9853	29.9243	29.94	31.9531	37.6277	58.8004	40.4713	32.854	32.8738	31.626	YGL125W
chrVII	274763	276748		17.3514	17.2256	14.5628	18.2323	16.0784	16.7765	16.457	24.2853	14.9742	16.9409	15.8108	15.485	YGL124C
chrVII	277518	278469	2_RPG	452.944	485.157	133.031	461.408	493.378	511.313	94.6784	87.861	570.502	505.398	486.393	446.627	YGL123W
chrVII	278695	280568		86.683	88.0689	124.182	95.5451	90.2983	94.2025	97.09	122.649	98.993	88.685	97.2112	101.401	YGL122C
chrVII	280743	281277		42.3574	41.6361	52.4332	43.0749	41.6919	45.2083	45.4223	64.4632	42.0812	44.1953	39.47	42.779	YGL121C
chrVII	281498	284002	1_RiBi	43.1799	46.6172	47.3218	56.2605	52.9561	51.1014	37.1975	30.4512	52.1933	49.1277	47.7227	49.3254	YGL120C
chrVII	284389	286080		15.9283	15.2996	18.1652	18.8256	16.9731	16.2465	17.3222	27.9858	14.9995	15.6828	15.4176	16.8833	YGL119W
chrVII	288394	289421		42.6824	45.1905	44.889	43.7835	40.1256	43.7492	34.1791	35.5715	35.3187	45.2131	42.0802	49.11	YGL117W
chrVII	289667	291746		30.5374	35.6378	34.2164	39.5022	30.4703	34.8534	26.0782	31.6016	31.2322	34.6248	32.3977	36.8344	YGL116W
chrVII	291884	293083		40.059	40.2503	42.3805	40.4722	41.5456	40.9114	37.7752	38.4192	36.13	40.4258	42.0443	38.8271	YGL115W
chrVII	293205	295701		24.25	24.9467	25.7026	27.6574	24.1246	23.8233	24.9252	27.6042	27.322	24.7229	25.5855	24.6583	YGL114W
chrVII	295895	298160		20.9124	19.9303	22.3495	22.8344	20.1204	19.925	23.7006	25.5233	19.2238	19.6804	19.7116	19.7712	YGL113W
chrVII	298032	299762		26.6675	26.7371	30.5151	29.3585	27.4646	27.0196	31.6306	39.1609	24.7846	26.979	27.4494	26.8335	YGL112C
chrVII	299924	301521	1_RiBi	34.9631	38.3048	43.0355	48.5615	42.138	40.0583	44.504	44.5568	39.1211	39.282	36.0926	40.5321	YGL111W
chrVII	303527	304165		46.2814	47.2578	42.1049	50.0826	46.0432	47.4842	33.4757	35.9558	45.2995	46.8613	44.92	45.2921	YGL108C
chrVII	304239	306331		31.0369	33.2045	34.4508	32.6581	32.0432	32.5972	34.2456	39.1615	31.0671	32.6802	32.007	31.5255	YGL107C
chrVII	306495	307258		61.5055	61.3385	62.8474	59.6524	59.3677	62.6607	48.6135	50.7983	75.769	64.9421	61.2229	61.5614	YGL106W
chrVII	307371	308669	1_RiBi	88.9152	88.1906	92.9727	99.5896	92.3542	91.4008	73.6484	68.8302	99.8397	90.4032	97.1711	92.3336	YGL105W
chrVII	308549	310188		14.9229	14.6428	16.4388	14.9099	13.215	14.1792	19.8513	30.1344	14.2782	13.2863	15.0783	14.5156	YGL104C
chrVII	310929	312009	2_RPG	819.22	856.198	243.02	787.899	880.26	874.03	111.995	83.4992	806.295	855.265	818.645	767.052	YGL103W
chrVII	312142	313092		66.8255	66.0234	62.4366	65.761	67.2001	63.7725	51.8939	47.5164	56.0877	64.4307	61.8578	62.5361	YGL101W
chrVII	313196	314373		28.0594	29.6328	30.739	30.9778	28.9441	27.9696	25.5007	28.8423	30.2318	27.9278	29.5536	27.6194	YGL100W
chrVII	314563	316596		33.4416	34.4575	32.6643	38.3711	37.3619	35.5426	27.456	22.8668	35.0618	36.3983	35.2968	34.8889	YGL099W
chrVII	317283	318660		24.0368	24.9812	27.0208	25.0542	23.2125	22.3806	31.0742	30.4468	22.9086	22.4782	25.5539	24.6872	YGL098W
chrVII	321715	323361		39.3848	40.0736	45.5594	42.6528	40.4008	40.9959	43.1249	51.9839	49.001	42.2171	40.0243	41.6349	YGL097W
chrVII	325285	326280		7.44765	7.43488	14.9733	7.08565	6.8472	6.83447	22.2017	33.3421	7.92343	7.48615	7.04129	8.7034	YGL096W
chrVII	328780	330684		18.05	17.6149	23.4686	18.2783	16.8029	18.1838	36.202	35.2338	14.8813	16.369	17.7127	18.2187	YGL095C
chrVII	330931	334653		27.2701	26.7854	34.8538	29.4803	27.2443	26.9202	39.8286	44.7098	25.2688	26.0161	30.3714	26.6663	YGL094C
chrVII	334827	337678		25.2152	23.2174	32.4598	25.6462	24.6249	23.552	34.3704	45.6611	25.7325	23.8627	26.3964	24.0788	YGL093W
chrVII	337770	341881		38.7476	39.8368	41.3467	44.3694	41.7022	41.3884	37.9964	29.7255	37.86	39.2429	42.3595	39.6873	YGL092W
chrVII	341897	343109		29.0958	28.8504	38.1437	31.7808	28.4931	27.8894	45.3009	50.7208	32.3074	28.9367	27.7529	31.4433	YGL091C
chrVII	343277	344676		21.3455	23.3051	25.7063	26.052	23.6323	21.4881	35.1164	39.0013	20.3311	21.876	21.6905	22.3827	YGL090W
chrVII	346289	346963		150.121	145.706	165.771	149.655	148.451	140.309	195.444	142.502	142.476	143.277	138.89	144.684	YGL087C
chrVII	347118	349454		28.1873	26.8887	28.5922	30.6651	29.1513	28.546	47.4023	46.4558	22.7093	27.2163	27.062	29.0711	YGL086W
chrVII	349557	350668		24.9492	22.5707	25.714	22.9135	22.5651	22.9889	44.0754	36.6704	21.2065	22.7902	21.8016	23.9166	YGL085W
chrVII	350526	352357		22.8967	23.841	27.7195	22.8149	22.1053	22.4913	35.852	35.5596	20.1337	22.0085	23.6676	22.5941	YGL084C
chrVII	352944	355597		26.217	25.2524	30.8134	27.5412	25.1539	26.12	40.4982	43.9038	25.8641	25.4196	27.1535	26.6785	YGL083W
chrVII	355736	357133		27.8513	27.5277	29.4299	26.8035	26.305	26.2308	42.1649	36.7862	28.0767	27.0731	28.2345	26.8355	YGL082W
chrVII	358555	359296		33.1746	30.517	33.8744	30.5068	31.9721	34.5959	42.0543	40.8523	29.011	30.8849	30.3191	33.5936	YGL080W
chrVII	359401	360243		30.4183	30.6486	29.0523	29.5283	31.0067	28.8014	39.7083	32.5417	27.7503	28.8653	25.4302	30.0087	YGL079W
chrVII	360098	361941		63.6105	65.1875	71.0682	77.6903	77.5202	72.2314	98.313	61.8713	68.1856	68.1805	69.921	72.0109	YGL078C
chrVII	362133	364086		78.5294	78.5638	88.1351	65.0204	79.6189	77.6802	91.9851	72.2711	80.5485	76.2293	82.6162	75.5682	YGL077C
chrVII	364225	366025	2_RPG	300.343	309.616	80.6425	273.231	336.282	331.359	67.6564	55.1039	285.125	313.673	311.225	285.853	YGL076C
chrVII	366569	368286		68.9286	63.5159	57.8862	55.9503	67.0216	59.7671	66.8611	45.428	50.8974	63.318	52.2425	53.8768	YGL075C
chrVII	368445	371313		52.9103	50.9584	71.2844	47.8959	48.2563	48.7819	81.1828	85.5013	51.0273	48.9433	49.0913	51.5423	YGL073W
chrVII	371549	374328		57.1123	58.9654	52.3264	51.176	58.2312	59.7453	62.1796	54.4324	55.4789	58.8231	63.2202	54.5796	YGL071W
chrVII	374126	374863		60.1197	64.7136	62.3657	61.1281	67.656	68.0213	74.1577	71.1611	59.3795	64.9325	58.993	62.8972	YGL070C
chrVII	375039	375781		59.448	58.6556	62.0801	54.6848	53.3173	56.8845	69.3858	70.6318	61.4684	59.7057	57.3754	55.3177	YGL068W
chrVII	375993	377280		33.2011	34.487	35.8336	34.4185	31.9992	33.6278	49.8076	49.8406	30.5111	31.6568	31.2662	31.0939	YGL067W
chrVII	377417	379812		29.172	27.8725	33.1539	29.3904	27.6099	27.0937	46.4152	40.9281	30.1119	27.7228	30.0631	27.9206	YGL066W
chrVII	379705	381326		26.1834	24.7816	27.2868	24.757	23.8442	24.3489	39.6469	30.2091	20.36	23.5368	23.3639	23.1546	YGL065C
chrVII	381468	383219		22.5135	21.2958	23.5469	23.3358	21.4187	21.3854	32.6249	30.592	20.3544	21.4601	19.8376	20.3585	YGL064C
chrVII	383422	384885		27.547	28.4354	30.8153	23.3053	26.1752	26.1248	37.7889	25.2331	33.1876	28.233	26.9531	26.8107	YGL063W
chrVII	388868	389783		25.4298	23.99	24.3868	26.1981	23.5291	24.8186	29.3764	27.2066	22.0877	24.9798	23.2457	21.5149	YGL061C
chrVII	389934	392038		17.9044	16.7431	19.2543	18.9265	17.0465	16.6711	27.9761	27.9619	15.6011	16.9287	16.5084	16.8679	YGL060W
chrVII	393889	394726		50.6908	48.7167	61.6896	49.3887	49.9048	47.6367	74.294	72.4421	45.5273	49.825	50.177	49.9175	YGL058W
chrVII	394805	395835		25.6046	24.807	30.1455	25.4032	23.2361	25.178	43.179	37.6746	24.0705	24.6456	24.5329	25.0712	YGL057C
chrVII	395944	397715		61.5851	66.3261	64.1388	63.3587	66.116	67.7398	78.4618	77.7065	69.2814	67.6447	61.2103	66.4851	YGL056C
chrVII	398280	400385		150.913	179.561	114.572	167.045	150.627	193.558	118.84	89.1939	142.835	179.626	93.814	194.597	YGL055W
chrVII	400287	401367		63.3708	62.6461	51.9632	53.0335	63.45	64.6691	57.4741	34.9742	44.573	63.2108	53.0323	59.4449	YGL054C
chrVII	402486	403469		20.3977	19.3591	25.7914	20.0963	18.3034	18.0935	34.7303	44.7195	17.5408	18.902	16.9923	19.7074	YGL053W
chrVII	403677	404855		19.096	17.8691	18.2256	17.2249	16.329	16.4642	23.7778	23.656	18.5911	17.2698	17.2901	17.1154	YGL051W
chrVII	405731	406736		33.6555	34.2955	36.6005	30.2482	31.209	32.4257	49.9865	40.5135	31.0248	34.6187	32.7556	32.4344	YGL050W
chrVII	406473	409777		25.4164	23.5948	30.4113	26.8797	24.2556	23.6117	45.7392	47.174	24.0224	24.1858	26.523	25.6956	YGL049C
chrVII	409972	411313		64.7164	63.0335	104.479	65.4141	57.7668	59.4686	107.291	144.76	64.7838	60.1637	63.5066	69.0714	YGL048C
chrVII	411464	412203		63.3329	58.4086	86.9888	50.7132	55.7624	53.45	97.3477	103.964	63.3908	61.4147	54.0221	62.646	YGL047W
chrVII	413763	415931	3_MSN2	16.2275	16.9689	16.779	20.7276	15.3486	15.5243	31.4578	45.6595	15.5561	15.6966	15.1184	16.4576	YGL045W
chrVII	415864	417260		24.9574	24.9553	29.3212	28.7891	23.2549	23.6589	38.8459	47.0174	25.639	24.2127	23.5862	25.8249	YGL044C
chrVII	417460	418620		47.8288	48.2394	49.6122	50.3022	46.514	46.3532	54.1606	54.2102	46.8771	46.1529	46.0483	46.1532	YGL043W
chrVII	418764	419411		41.8592	39.6065	43.618	40.2857	40.1851	38.1543	59.0649	46.5041	35.995	39.3334	36.6329	39.8803	YGL041W-A
chrVII	419321	420708		58.6924	57.5146	67.6172	51.172	56.1719	54.8098	70.8274	84.4476	58.5222	58.5545	54.8765	57.265	YGL040C
chrVII	423819	425130		28.5199	27.7594	35.3624	29.8594	25.0938	26.7951	56.1727	44.621	27.4743	27.4192	25.5493	31.2482	YGL039W
chrVII	425073	426848		51.6367	47.6205	55.7639	44.0908	46.4016	47.3846	75.054	72.5543	48.8834	46.3189	49.0733	49.96	YGL038C
chrVII	427155	428066		61.6309	55.7835	107.637	44.694	43.6756	51.5867	241.635	203.841	59.228	50.5049	56.9226	66.9187	YGL037C
chrVII	428559	431443		20.618	21.146	23.768	21.8611	18.6117	20.4421	34.8183	52.8564	17.4766	19.2209	19.092	21.5615	YGL036W
chrVII	431292	433176		44.9314	44.0921	54.044	39.8844	41.3412	42.785	63.1305	53.6908	49.9163	45.3902	45.6531	43.532	YGL035C
chrVII	437401	438397	2_RPG	289.335	292.653	68.5599	286.986	308.46	305.586	49.1596	46.1222	296.896	300.977	301.733	259.659	YGL031C
chrVII	438944	439738	2_RPG	555.822	554.878	154.376	492.588	589.2	575.42	117.596	74.2583	500.82	559.58	501.164	484.428	YGL030W
chrVII	439995	440658	1_RiBi	60.3392	62.3859	51.1483	60.7007	68.1774	65.6441	49.8693	32.276	55.9688	59.9808	49.094	60.1988	YGL029W
chrVII	440980	443391		207.745	181.206	161.859	144.324	217.906	185.461	128.849	26.2648	198.177	182.249	193.162	164.718	YGL028C
chrVII	443548	446173		30.1356	28.3306	28.3494	26.2023	28.5874	26.843	32.3053	25.3449	28.8301	27.567	28.8886	25.4492	YGL027C
chrVII	446329	448578		48.2662	47.8708	50.7291	48.1129	44.6664	46.1677	45.0403	57.3505	55.7355	48.2633	48.1193	47.4713	YGL026C
chrVII	448706	449994		37.2609	35.2239	37.1767	36.665	33.5783	32.3667	31.1465	36.3507	43.2638	36.5973	36.7111	35.0605	YGL025C
chrVII	450068	452152		26.7865	27.8685	31.5159	29.655	25.8511	25.4931	29.2511	37.3838	34.3719	27.4229	27.887	25.7925	YGL023C
chrVII	452309	454733		53.9413	54.769	56.4793	51.2444	51.0367	53.2489	51.3662	56.8338	64.6299	54.637	54.0326	51.5486	YGL022W
chrVII	454784	457171		34.584	36.4228	31.7419	44.7884	34.2348	38.6221	34.5392	28.0281	31.437	36.5147	35.0229	36.4423	YGL021W
chrVII	457082	457933		36.7798	34.0501	33.2078	32.6367	34.3343	33.6498	37.3137	34.9608	32.8142	35.6577	33.6351	31.4482	YGL020C
chrVII	458060	459102		48.5054	47.9138	51.8702	46.2815	45.6204	45.5794	56.9686	60.1266	55.9009	45.1025	48.0142	42.9907	YGL019W
chrVII	458778	459698		30.0912	31.1012	31.7339	32.4071	28.6169	27.9173	38.8633	42.3465	33.3837	28.2524	30.5463	27.1926	YGL018C
chrVII	459826	461453		22.9763	22.176	23.4423	25.0639	22.914	22.3894	31.3175	36.7478	23.2788	21.6621	21.8888	21.6487	YGL017W
chrVII	461596	465119		20.6337	20.1444	22.4238	20.9269	19.7562	19.4318	29.2657	28.0931	15.1667	18.9206	18.4158	18.9581	YGL016W
chrVII	465727	468903		45.5412	45.1643	47.6375	48.189	47.7131	46.2246	51.6658	54.6113	42.4962	44.991	45.9565	45.411	YGL014W
chrVII	469053	472432		36.4302	33.884	49.6787	33.9694	34.9558	34.2711	51.102	51.2037	33.3441	34.2458	34.7999	36.7062	YGL013C
chrVII	472805	474373		53.4711	50.2858	65.5159	51.9409	46.4831	48.9493	86.0198	107.934	53.3482	52.2822	50.6021	55.3382	YGL012W
chrVII	474360	475282		91.7194	84.0073	131.172	86.2442	78.271	81.0522	128.767	146.266	83.3968	79.5851	82.3476	87.5077	YGL011C
chrVII	475475	476242		62.5604	59.7504	97.3819	59.1665	54.2744	54.5923	92.6202	98.0119	51.3019	59.3348	51.4299	63.1592	YGL010W
chrVII	476169	478730		150.275	151.654	174.897	155.468	138.315	141.466	118.358	79.3552	159.716	154.969	164.433	152.991	YGL009C
chrVII	479394	482901		934.384	940.808	685.363	764.557	910.6	917.818	212.949	123.177	905.644	908.098	882.222	858.182	YGL008C
chrVII	485453	489577		16.8605	15.43	24.2191	15.4894	13.3605	14.5679	22.5309	30.6086	15.8262	15.7694	16.7715	18.4447	YGL006W
chrVII	489492	490575		25.6212	23.7467	29.5858	22.4367	21.9706	22.7344	34.1913	36.8672	17.5347	22.5425	23.1313	25.0271	YGL005C
chrVII	490740	491978		25.5605	24.1119	32.3346	24.5828	23.4388	22.3688	38.4012	37.7511	23.4521	25.2401	23.6846	24.8599	YGL004C
chrVII	492325	494276		37.6502	36.3098	42.7933	37.7771	36.8288	35.9171	43.2294	55.579	40.6283	37.9144	36.9918	38.6482	YGL003C
chrVII	494405	495340		34.2785	30.8331	32.8219	29.5614	30.0216	29.8943	30.2771	37.5553	27.3451	29.384	28.179	29.3608	YGL002W
chrVII	495328	496610		37.9039	35.0869	37.1062	36.0572	33.1289	35.1939	33.6469	46.9671	34.4536	37.5319	33.963	32.331	YGL001C
chrVII	497064	498051		49.0486	44.7654	41.8318	44.7673	50.8211	49.7709	33.5642	24.0381	39.4829	47.0075	43.4574	49.483	YGR001C
chrVII	498228	499914		34.2702	32.1366	31.8051	34.0958	32.1133	32.008	31.8732	42.7219	30.7429	31.4264	31.8398	34.6392	YGR002C
chrVII	500103	502612		23.0143	22.2512	25.3547	24.7427	21.9973	20.8512	26.4832	30.529	18.0648	21.1658	20.3517	22.9307	YGR003W
chrVII	502909	504574		19.797	19.2698	19.8501	18.3344	19.6655	19.7183	17.9077	17.0501	18.1185	19.3988	19.5699	18.5756	YGR004W
chrVII	504552	505888		29.7007	28.145	30.806	29.2589	27.3437	27.3351	30.1267	38.4006	28.2401	27.4901	27.0725	27.8104	YGR005C
chrVII	506922	508081		53.2741	55.1995	61.5295	56.5605	51.158	51.0624	54.1233	75.5606	51.4238	52.0905	53.8396	54.4926	YGR007W
chrVII	507971	508544		34.2205	34.4048	42.2818	27.6077	29.9258	29.9703	52.7284	67.8738	30.0237	33.6823	32.0163	37.9345	YGR008C
chrVII	508993	511072		31.3812	32.237	38.7694	32.1294	30.3893	30.5961	46.978	50.8267	33.2971	33.2924	32.1065	31.691	YGR009C
chrVII	511421	513004		34.3222	32.723	36.8166	31.0726	30.1996	30.2446	33.7505	44.1562	31.943	30.9662	30.4407	30.2449	YGR010W
chrVII	513129	514373		28.4515	27.998	27.5747	28.6963	27.906	24.7505	29.0455	32.7383	31.3517	27.7045	27.4992	26.1114	YGR012W
chrVII	514530	516684		37.779	35.6353	36.9794	34.2145	33.5458	33.4275	32.6641	34.4738	38.3806	36.1059	32.9648	34.7677	YGR013W
chrVII	516667	520991		82.5274	84.296	77.5338	83.5895	81.8096	83.8735	51.7733	53.0517	95.6833	87.9301	85.6094	88.6994	YGR014W
chrVII	520982	522094		34.5591	31.9466	34.8296	26.9365	28.7325	28.9164	42.6354	30.6158	28.7853	30.0144	29.3025	29.7096	YGR015C
chrVII	522237	522989		26.7476	23.442	23.9126	20.0863	22.4944	21.7534	33.1403	24.0042	19.1125	21.6887	21.7989	20.3947	YGR016W
chrVII	523532	524795		56.2182	55.1449	60.6921	48.0685	54.7989	53.8194	69.8458	52.9631	53.5693	54.312	55.9566	52.2001	YGR017W
chrVII	525190	526737		34.4223	30.6468	47.2353	31.142	25.8141	28.1066	54.9019	70.1208	31.2545	29.7694	29.2661	32.7222	YGR019W
chrVII	526838	527441		57.9264	61.9864	65.0216	52.4473	53.3543	58.0939	58.7905	59.7189	56.8084	55.0512	57.2089	55.8543	YGR020C
chrVII	527583	528583		27.1335	28.8958	33.2316	26.3624	25.8046	26.0715	34.9428	29.0885	31.1911	29.0308	24.5155	28.979	YGR021W
chrVII	529106	531172	3_MSN2	18.0131	18.9005	24.7548	20.8961	15.0716	16.5889	27.6335	34.1942	17.1375	18.1588	16.4483	19.5572	YGR023W
chrVII	531800	532649		33.8434	34.6574	32.9335	33.7853	35.1592	35.6716	34.3108	27.9286	24.8335	34.2564	31.2307	31.7387	YGR024C
chrVII	532805	534080		47.2464	43.2257	36.0621	38.6234	43.6575	43.6125	39.7899	39.8577	37.2107	42.7708	42.6229	42.0489	YGR026W
chrVII	534068	534785	2_RPG	374.431	373.136	110.77	346.453	392.487	382.647	85.4946	60.3805	366.045	381.356	355.457	331.996	YGR027C
chrVII	542039	543439		20.0444	19.1926	16.9	16.1399	17.1506	18.0983	27.7136	27.2133	16.1029	19.7095	16.5532	16.8449	YGR028W
chrVII	543528	544301		26.7214	27.5253	26.0454	28.9421	26.9131	26.5542	32.6239	40.2446	25.41	30.5358	26.0151	28.0208	YGR029W
chrVII	545432	546170		154.016	141.151	125.162	145.64	155.015	149.2	131.794	67.1085	113.044	140.485	129.921	140.728	YGR030C
chrVII	546354	547779		40.9568	41.2705	45.7409	34.8602	35.2106	38.4418	58.2915	46.9312	44.8716	40.083	36.2905	37.5323	YGR031W
[truncated: 3,046 more rows]
