# Supplementary material for: A ribosome assembly stress response regulates transcription to maintain proteome homeostasis
Source: eLife. 2019 May 24;8:e45002. doi: 10.7554/eLife.45002 (PMC6579557; doi:10.7554/eLife.45002)
Supplement: Supplementary file 2. [file elife-45002-supp2.xlsx]

## Sheet: Feuil1
Supplementary File 2
Rpb1 ChIP-seq at the indicated times following either auxin (Aux), vehicle (veh), diazaborine (Diaz), or cycloheximide (CHX) addition to the media. Category (cat): Hsf1 genes (Hsf1), Ribosome Biogenesis genes (RiBi), Msn2/4 genes (Msn2), Ribosomal Protein genes (RPG). Position of each ORF in the chromosome is indicated (Chr, Start, End).
#chr	start	end	cat	20min Veh	20min Diaz	20min CHX	Utp13-AID veh	Utp13-AID Aux	Utp8-AID Veh	Utp8-AID Aux	name
chrI	1788	2191		0.826179	1.54499	0.685707	0.873697	1.92834	1.53591	1.95117	YAL068C
chrI	11698	14645		20.1734	33.1333	17.5413	13.9507	15.8108	14.6661	18.1819	YAL064C-A
chrI	21341	21981		3.47669	9.42987	3.71787	5.29414	7.13706	5.26141	10.0107	YAL064W
chrI	23940	28043		13.34	18.2245	11.382	8.50709	9.18188	8.57204	11.253	YAL063C
chrI	31187	33041		29.273	42.2021	15.2361	24.9116	29.1254	25.9998	27.2011	YAL062W
chrI	33222	34864		42.1028	73.3719	32.1134	23.998	28.3822	22.1755	24.8017	YAL061W
chrI	35056	36421		64.1846	60.1275	66.1343	42.8395	51.2812	41.8115	50.2288	YAL060W
chrI	36508	37275		45.1123	27.0669	37.6659	99.0037	109.784	102.528	116.678	YAL059W
chrI	37379	39106		16.4423	16.9138	16.6389	13.9628	14.4797	15.588	17.4138	YAL058W
chrI	39204	42030		26.7312	30.3285	23.3599	24.6688	29.6808	25.0557	32.7534	YAL056W
chrI	42154	42862		20.6759	29.9062	15.5904	20.8404	25.7203	23.7757	25.77	YAL055W
chrI	45743	48316		30.6319	27.1334	62.814	26.1676	30.6773	26.8315	32.8497	YAL053W
chrI	48538	51858		21.6665	26.0741	24.6061	24.4139	27.3574	24.47	28.8801	YAL051W
chrI	51739	52660		29.3115	44.2666	34.6822	26.6725	29.5596	25.8765	33.1035	YAL049C
chrI	52729	54798		18.6063	23.1193	20.5117	17.2199	19.2983	16.0681	18.7227	YAL048C
chrI	54925	56885		13.1482	14.8197	13.3438	14.1362	17.128	14.1197	15.2157	YAL047C
chrI	56919	57390		28.9306	34.1386	30.4079	26.3074	26.6253	30.1667	26.9613	YAL046C
chrI	57480	57963		25.7931	40.4995	31.4293	16.8671	24.6602	22.0004	21.3759	YAL044W-A
chrI	57867	58475		43.4428	50.7351	59.7501	19.6507	32.0425	20.7717	25.4357	YAL044C
chrI	58632	61092		41.3606	52.8074	37.2642	24.8099	27.286	23.6955	30.0239	YAL043C
chrI	61268	62656		50.1068	71.692	33.7118	37.881	40.3294	36.7985	45.9768	YAL042W
chrI	62775	65464		39.738	62.5875	38.8434	33.888	39.1586	35.7882	50.2884	YAL041W
chrI	65381	67849		115.703	78.1374	77.8751	127.654	107.957	131.676	102.087	YAL040C
chrI	68648	69599		56.0787	99.3722	63.0768	34.2466	42.2171	31.6859	50.8353	YAL039C
chrI	71643	73454		665.117	505.422	579.117	479.245	413.766	463.695	416.531	YAL038W
chrI	73838	74859		11.9233	42.0145	12.5661	14.8992	19.3239	15.8972	21.8791	YAL037W
chrI	74852	76198		53.7236	45.9793	44.3901	56.8204	53.0208	56.5665	60.3792	YAL036C
chrI	76400	79562	1_RiBi	94.8191	74.4553	88.4281	79.291	82.8041	77.8445	83.9781	YAL035W
chrI	79673	80669		25.8063	26.6221	18.5082	28.7871	27.1633	26.7483	30.0976	YAL034W-A
chrI	80566	82584	3_MSN2	27.6881	33.7129	24.6705	18.1383	20.1656	19.3403	23.1079	YAL034C
chrI	82684	83301		31.5787	33.3462	24.6829	34.3877	42.3712	36.4392	38.5705	YAL033W
chrI	83276	84506		35.2621	35.7323	25.0945	26.9456	27.0895	24.099	25.7846	YAL032C
chrI	84639	87077		22.7496	22.9887	23.645	17.812	19.9961	19.4166	22.7388	YAL031C
chrI	87249	87857		25.5862	36.6579	29.8546	27.4174	29.4145	31.0562	31.6716	YAL030W
chrI	87756	92523		33.1655	25.8203	27.6143	34.4688	37.7952	33.7222	39.0105	YAL029C
chrI	92848	94539		11.5184	18.4383	28.6552	11.6275	13.2833	11.9331	13.713	YAL028W
chrI	94606	95579		22.7735	24.254	23.0926	23.5939	26.2924	25.6258	26.4128	YAL027W
chrI	95481	99782		18.5433	20.5265	19.882	19.7269	22.141	21.187	23.7465	YAL026C
chrI	100037	101173	1_RiBi	80.8819	37.5588	73.7704	103.39	111.448	104.08	113.482	YAL025C
chrI	101279	105965		22.2683	14.0862	16.6502	24.7523	24.4342	25.1972	22.5303	YAL024C
chrI	106141	108695		80.9562	49.8929	45.0214	56.0629	50.956	57.9594	48.6993	YAL023C
chrI	108876	110462		26.5016	31.0449	30.3046	20.6405	15.6419	21.1411	16.9186	YAL022C
chrI	110631	113419		41.0061	37.0965	30.2112	23.103	25.4184	25.1673	25.7526	YAL021C
chrI	113535	114629		35.659	41.3173	25.5068	18.3912	20.398	17.7386	17.0333	YAL020C
chrI	114808	118365		32.9576	22.7631	25.0172	40.4312	43.6016	40.1326	41.0969	YAL019W
chrI	119857	124484		18.962	25.8423	17.4962	13.1214	16.4098	13.5555	18.1325	YAL017W
chrI	124781	126856		51.0769	59.1765	41.4385	43.2145	45.6865	42.1897	45.9211	YAL016W
chrI	126769	128102		21.598	34.3878	24.0345	16.6545	20.6895	16.8935	21.2043	YAL015C
chrI	128086	129071		45.6933	82.2742	41.0627	30.0306	40.2691	32.3433	40.4195	YAL014C
chrI	129209	130589		54.2314	112.781	36.3305	28.6053	33.4617	30.9851	33.4908	YAL013W
chrI	130734	132084		153.929	270.884	59.4601	88.4794	90.2872	84.1718	94.7139	YAL012W
chrI	132184	134174		28.6652	32.9484	22.7976	25.2093	27.2225	25.4448	32.0539	YAL011W
chrI	134086	135705		20.703	27.5431	19.7373	28.029	30.7914	27.2256	33.0626	YAL010C
chrI	135828	136758		23.6028	32.6293	20.4344	24.6065	33.4647	26.0404	31.2591	YAL009W
chrI	136834	137644		21.2478	34.0539	15.9904	16.665	22.3524	16.8225	23.0109	YAL008W
chrI	137546	138452		51.7267	49.9217	23.0926	66.8657	68.2229	67.4861	66.5056	YAL007C
chrI	139355	141660	4_HSF1	299.066	1154.23	34.4989	181.03	347.688	147.167	363.994	YAL005C
chrI	142116	143370	1_RiBi	463.022	383.578	271.298	486.135	492.72	480.687	509.638	YAL003W
chrI	143615	147587		19.7018	37.6405	14.0318	15.9425	15.8214	16.6717	14.8026	YAL002W
chrI	147560	151202		24.2211	27.3253	13.7257	20.3947	22	20.0246	22.2466	YAL001C
chrI	152214	153976		40.7143	49.7281	33.5699	35.6229	48.0365	37.5571	50.9797	YAR002W
chrI	153932	154827		48.5605	53.6788	29.812	66.5383	74.3022	68.8194	68.6224	YAR002C-A
chrI	154919	156781		29.0342	45.4194	18.0095	21.616	27.3889	21.6003	27.304	YAR003W
chrI	156679	158688		37.1668	67.7768	10.1444	31.5687	39.7575	28.0614	42.2959	YAR007C
chrI	158846	159881		30.4705	51.103	10.4996	35.9124	41.3236	37.6127	39.5581	YAR008W
chrI	166567	169020		37.3259	30.6605	27.0153	30.5102	39.2607	31.5866	37.6766	YAR014C
chrI	169223	170392		24.4198	25.1032	26.6206	19.938	26.7441	21.3601	24.9841	YAR015W
chrI	170262	171737		26.8111	26.2625	19.939	22.8384	29.5347	25.9793	28.9534	YAR018C
chrI	172135	175167		15.2798	27.5533	14.9972	13.9368	16.5102	13.8703	17.6006	YAR019C
chrI	176662	177189		7.78894	19.0691	13.6659	6.36806	8.74706	7.74918	12.1401	YAR020C
chrI	183698	184655		26.906	41.2547	28.6833	29.8142	34.771	34.499	39.8372	YAR027W
chrI	184812	185793		16.9657	29.4099	24.0465	16.589	18.4117	16.2142	19.1294	YAR028W
chrI	188048	188963		20.7411	30.9773	18.3853	23.1428	22.67	20.8339	23.4394	YAR033W
chrI	190138	192572		6.32362	12.0926	22.408	7.55185	9.02075	7.5721	7.32053	YAR035W
chrI	192564	196350		35.4208	32.4921	28.2893	22.5939	25.4727	22.5877	24.5755	YAR042W
chrI	203375	208127		12.8738	16.2516	12.5907	7.44909	7.25115	7.86082	8.37281	YAR050W
chrI	225158	226914		15.5644	18.4265	16.7951	21.1159	14.0911	14.7455	12.1768	YAR071W
chrII	7622	7982		0.103333	0.770972	0.342694	0.6555	0.405028	0.485944	0.549389	YBL108C-A
chrII	9818	10551		37.4663	60.9275	28.1797	56.8359	83.0234	53.4706	56.938	YBL107C
chrII	10719	13945		14.4725	20.626	16.4879	11.9054	15.1107	12.0615	16.6294	YBL106C
chrII	13988	17964		32.3245	25.5505	29.633	29.2317	31.2318	28.289	28.2265	YBL105C
chrII	18146	21315		21.2183	21.4698	22.3783	18.2356	21.0479	19.6096	22.2119	YBL104C
chrII	21619	23801		27.2957	26.9718	28.724	30.116	32.0196	30.9637	31.3447	YBL103C
chrII	23979	24894		32.6803	50.9791	33.856	24.4814	29.8725	28.9273	32.8249	YBL102W
chrII	24779	28605		22.8299	46.49	20.2648	13.4307	24.8256	13.1767	24.9405	YBL101C
chrII	36735	38964	3_MSN2	105.196	64.1425	47.4351	78.9911	78.3682	82.4989	72.762	YBL099W
chrII	39114	40626		9.80509	17.5281	23.1898	9.42987	9.09751	9.54899	7.88369	YBL098W
chrII	40772	43100		32.2446	26.1111	31.0323	32.6664	32.7736	31.4455	30.9325	YBL097W
chrII	43260	44209		39.0962	38.7915	81.3219	21.6474	25.345	20.9938	23.069	YBL095W
chrII	44105	45016		40.0851	35.8825	58.9127	24.1313	22.6368	23.3338	27.4094	YBL093C
chrII	45514	46440	2_RPG	445.257	44.0035	652.861	441.124	69.4485	410.025	57.5776	YBL092W
chrII	46494	47192		71.2016	27.0476	78.191	58.6733	21.0973	55.7723	21.1208	YBL091C-A
chrII	47272	48694		32.8107	30.7094	35.2035	31.5036	29.8638	29.9531	28.9165	YBL091C
chrII	48793	49478		40.8774	35.6982	34.9707	54.3459	55.9487	52.638	51.3786	YBL090W
chrII	49557	51025		23.8087	24.7921	23.591	21.7273	21.611	21.7796	24.6446	YBL089W
chrII	50930	59654		17.0544	13.9907	20.0681	16.8718	13.454	16.5055	14.4575	YBL088C
chrII	59721	60821	2_RPG	221.596	38.6962	296.275	254.58	82.8055	206.798	70.6153	YBL087C
chrII	61159	62682		23.6155	27.33	26.8429	18.6369	20.6289	16.8835	24.6624	YBL086C
chrII	63684	66936		34.0885	26.1332	20.916	28.1094	28.6354	29.7114	27.1974	YBL085W
chrII	67042	69568		22.3351	24.7434	20.1045	21.997	26.5389	21.0019	27.8166	YBL084C
chrII	69657	71172		23.8018	18.0228	20.7598	19.587	19.1169	17.2706	19.9479	YBL082C
chrII	71551	73031		56.6213	34.855	58.1035	62.4605	62.0882	67.4062	62.9428	YBL081W
chrII	72984	74710		18.2945	20.6142	13.1521	14.9006	17.1223	15.8833	17.8405	YBL080C
chrII	75195	80047		36.3082	28.8155	31.0797	38.8057	41.8018	40.6779	42.4124	YBL079W
chrII	79893	80790		17.5305	33.3665	21.6767	21.8676	38.7433	21.245	37.5193	YBL078C
chrII	80951	84306	1_RiBi	90.1855	52.5254	100.754	84.6989	78.3067	77.358	76.5791	YBL076C
chrII	88414	89500	2_RPG	346.994	67.8784	478.245	345.715	82.4094	314.35	84.2788	YBL072C
chrII	89942	90474		66.3111	34.9999	96.8115	89.4315	60.5693	81.9839	70.7832	YBL071W-A
chrII	90630	92172		31.1254	25.5548	46.6668	31.17	23.03	27.8233	23.6666	YBL069W
chrII	92335	93524		31.6775	24.0453	39.3997	38.0407	38.4596	35.4166	39.7192	YBL068W
chrII	93550	96168		24.2119	31.9826	20.4775	28.3943	30.7457	28.6788	36.669	YBL067C
chrII	96338	100155		29.4483	29.6307	30.3009	23.2852	26.7133	24.1488	26.6043	YBL066C
chrII	100298	101223		25.6989	37.2254	25.315	17.2179	20.7958	18.2915	30.4188	YBL064C
chrII	101868	105325		15.9279	29.7613	12.3614	16.0221	23.2939	16.5328	26.1104	YBL063W
chrII	105211	107505		33.6461	32.024	61.1579	36.3616	41.8913	39.0751	40.3634	YBL061C
chrII	107894	110041		20.2771	24.5345	29.7594	21.3376	26.8785	22.0318	29.3462	YBL060W
chrII	109880	110570		29.7057	30.8299	36.5218	53.4566	63.7693	50.3426	53.2918	YBL059C-A
chrII	110593	111357		37.5554	47.669	39.2506	39.8405	50.0745	43.3396	42.832	YBL059W
chrII	111395	112826		50.0351	91.0736	31.1511	33.0148	57.481	31.1951	58.13	YBL058W
chrII	112728	113457		39.1593	45.1471	34.4755	29.2139	39.0774	31.1479	36.7676	YBL057C
chrII	113625	115562		59.5811	51.464	51.4186	59.5846	71.9832	63.3164	72.8016	YBL056W
chrII	115476	116829		31.0142	40.3463	30.3388	25.8994	29.487	24.3995	32.241	YBL055C
chrII	117473	119361		34.2649	22.3212	39.1848	54.16	58.0786	54.533	62.248	YBL054W
chrII	119304	122140		20.5818	15.5998	21.4646	30.5049	33.7346	30.8619	31.5152	YBL052C
chrII	122305	124843		40.0744	31.6569	41.0852	45.4109	50.2593	47.5562	54.6576	YBL051C
chrII	125037	126182		34.0663	46.058	32.1301	25.2145	30.7236	26.5494	30.857	YBL050W
chrII	127685	132205		46.6851	43.6634	33.5681	31.9479	31.46	32.4238	33.3218	YBL047C
chrII	132402	134043		29.2982	27.366	29.6148	28.2969	31.0259	28.3863	29.4167	YBL046W
chrII	133813	135701		69.1752	53.4783	31.6591	47.9891	48.468	46.8964	48.0135	YBL045C
chrII	136488	137611		6.86545	19.5374	13.3503	8.50841	13.8396	8.95013	14.365	YBL043W
chrII	138076	140348	1_RiBi	62.3266	49.1285	27.8675	90.3189	93.2956	84.2917	82.8127	YBL042C
chrII	141032	142020		84.6671	137.354	33.3971	77.8493	129.103	81.1597	131.468	YBL041W
chrII	142112	142910		58.0867	76.5683	41.6937	63.9951	78.8285	64.6987	83.3995	YBL040C
chrII	143085	143726		16.4047	30.9466	13.0988	24.7045	33.4238	25.5203	40.4791	YBL039W-B
chrII	143882	145817	1_RiBi	73.3205	29.5696	57.9943	69.1349	78.1803	68.419	82.8157	YBL039C
chrII	146097	146979		52.393	49.8956	35.6697	56.6471	60.1226	59.0029	57.9121	YBL038W
chrII	147110	150427		19.8427	25.5978	19.4009	15.9833	17.7185	17.0946	20.6398	YBL037W
chrII	150299	151268		36.7476	35.493	40.8814	40.7793	43.2136	38.5354	43.6336	YBL036C
chrII	151409	153702		34.6678	23.7253	17.9193	31.7497	32.6712	32.7963	31.3374	YBL035C
chrII	153847	158450		20.2771	19.794	16.1261	21.9897	24.1772	22.407	24.4981	YBL034C
chrII	158539	159720		54.1138	65.7609	39.5452	33.5343	34.0281	31.7328	34.3572	YBL033C
chrII	160085	161524		38.3551	37.9992	30.7372	27.6826	29.2891	31.2138	34.3051	YBL032W
chrII	161660	162861		30.9248	30.8382	21.2219	28.8823	30.4544	28.256	33.4889	YBL031W
chrII	162739	164144		148.845	111.969	102.501	143.883	144.478	149.68	154.979	YBL030C
chrII	164346	164890		46.9422	42.9333	33.1161	48.0941	54.9785	53.361	63.8371	YBL029C-A
chrII	166065	167470		31.4458	15.2018	48.9561	45.2378	65.0632	42.6711	59.485	YBL029W
chrII	167233	167895		54.7816	16.8909	75.2703	133.686	136.499	136.345	134.09	YBL028C
chrII	168391	169467	2_RPG	340.341	42.3529	508.169	253.654	38.0664	208.8	32.5585	YBL027W
chrII	170551	171166		54.4683	36.047	59.8114	95.7756	87.7625	90.5737	89.1301	YBL026W
chrII	171412	172208		35.5899	28.5497	37.9823	37.524	33.2929	35.1061	29.4563	YBL025W
chrII	172471	174664		53.7499	30.9146	52.5636	56.1545	54.0831	53.3903	52.7261	YBL024W
chrII	174707	177578		26.2653	31.135	21.6758	21.4585	23.6381	22.0856	25.2497	YBL023C
chrII	177796	181407		40.8671	55.827	20.2068	29.8286	52.7409	27.3849	50.1949	YBL022C
chrII	181488	182125		40.2602	58.7795	31.7319	37.7961	44.3935	33.2	42.8245	YBL021C
chrII	182328	184225		23.8602	22.6669	21.189	31.1137	32.1786	30.6682	33.5063	YBL020W
chrII	184300	185960		19.1004	21.2068	19.5664	21.8469	24.3157	20.559	25.9617	YBL019W
chrII	185932	186528		31.2524	24.9174	22.9601	44.4501	45.9971	41.2633	43.5508	YBL018C
chrII	186772	191787		35.0759	26.1907	34.1591	29.5258	30.6358	28.3851	27.4319	YBL017C
chrII	192360	193648		40.021	31.7901	45.8792	28.4563	32.3427	25.6337	28.598	YBL016W
chrII	194018	195976	3_MSN2	17.1833	27.8712	26.8936	9.15537	11.9691	9.09904	12.5658	YBL015W
chrII	198952	201776		29.5954	27.9073	21.5486	35.9025	42.8236	38.1722	42.0997	YBL014C
chrII	203436	206020		36.0275	50.4588	23.1661	31.9656	40.6878	31.2701	40.2469	YBL011W
chrII	205930	206983		34.0364	26.8292	17.4909	34.6023	35.9015	37.1987	37.5978	YBL010C
chrII	207159	209352		29.9672	18.914	14.8613	37.844	37.0241	39.879	35.5637	YBL009W
chrII	209496	212270		14.9618	17.4709	13.5611	15.6628	16.7702	16.5775	18.1222	YBL008W
chrII	212546	216420		46.5535	52.8651	35.8184	26.5466	25.3207	27.1317	24.8247	YBL007C
chrII	216412	217159		83.1967	96.2866	55.4577	54.7408	61.2532	53.9358	51.2717	YBL006C
chrII	217398	220591		46.7509	59.1857	36.3201	45.4051	81.3638	40.1066	65.2291	YBL005W
chrII	227528	235177	1_RiBi	37.4437	36.6638	34.0967	63.842	63.4641	65.3121	55.6174	YBL004W
chrII	235219	235855		323.373	304.115	345.187	378.466	351.996	368.503	384.877	YBL003C
chrII	236363	237145		296.119	230.434	300.038	396.492	386.068	405.526	386.889	YBL002W
chrII	237086	237572		60.8022	66.7715	51.4248	90.4252	90.3812	95.0095	89.8068	YBL001C
chrII	238763	241446		21.6648	34.6323	17.6411	18.7281	23.7159	19.3282	24.17	YBR001C
chrII	241592	242601		75.0559	61.6601	47.8676	70.9122	82.057	75.2925	87.938	YBR002C
chrII	242774	244351		26.555	37.7364	19.4178	19.4561	28.709	23.0756	31.0127	YBR003W
chrII	244272	245682		24.4745	25.0752	36.6449	39.6998	46.0677	42.8358	48.8653	YBR004C
chrII	245816	246693		28.8168	37.6437	55.5857	20.3981	27.6048	18.7184	26.3931	YBR005W
chrII	246878	248646		22.6876	29.9503	21.7504	25.6505	29.2513	26.5276	33.1122	YBR006W
chrII	248676	251161		28.7605	35.0107	27.4248	32.063	40.8402	31.6004	42.3866	YBR007C
chrII	255207	255781		414.632	488.545	468.699	465.277	460.799	474.184	491.229	YBR009C
chrII	256302	256903		422.608	513.968	471.149	351.489	340.724	339.526	358.86	YBR010W
chrII	256998	258041		131.894	187.916	89.5814	112.798	115.38	103.874	114.193	YBR011C
chrII	265157	266235		0.133228	0.815594	0.0527829	0.645019	0.973506	0.594147	0.929453	YBR013C
chrII	266617	267418		29.0404	28.3821	22.191	34.0117	35.3692	34.8738	39.1621	YBR014C
chrII	267575	269595		44.532	34.0222	37.4352	35.7819	36.9423	35.5069	36.4178	YBR015C
chrII	270209	270841		51.6713	73.8312	62.172	45.3495	55.3029	50.3806	62.2332	YBR016W
chrII	270843	273769		36.2394	28.2948	38.0578	35.5341	40.5717	35.4651	44.1004	YBR017C
chrII	281306	283509	1_RiBi	40.1014	25.2419	38.0532	46.8031	48.0256	45.8507	37.5887	YBR021W
chrII	283660	284421		34.6515	28.1834	31.9218	43.5736	41.0506	40.9244	40.2942	YBR022W
chrII	284277	288068		44.1087	35.3642	61.7628	42.1713	45.1863	42.4364	41.0192	YBR023C
chrII	289327	290567		30.9559	45.186	30.3333	40.0088	38.8522	35.8132	40.5627	YBR024W
chrII	290475	292038		137.167	106.879	126.716	159.594	161.859	145.549	144.196	YBR025C
chrII	292760	294086		22.4068	26.9666	28.7424	16.2069	17.2328	15.368	17.8056	YBR026C
chrII	294280	296101		27.768	21.5079	25.9703	24.3602	27.8409	23.2716	28.9976	YBR028C
chrII	296295	297821		49.6634	42.8102	32.6365	64.7729	70.5012	58.8645	70.5002	YBR029C
chrII	298208	300063		42.8935	27.1163	38.2327	47.3818	49.3129	45.1787	42.4189	YBR030W
chrII	300141	301349	2_RPG	347.528	143.981	382.164	239.922	200.534	225.996	206.154	YBR031W
chrII	301887	304762		14.5954	37.8751	17.9926	15.0576	31.2032	16.3665	43.4496	YBR033W
chrII	304750	306045		78.3581	46.9795	90.9345	90.6026	103.283	87.4095	94.9893	YBR034C
chrII	306117	306989		65.6108	67.3012	64.9646	68.2518	73.8971	64.4195	70.4754	YBR035C
chrII	308758	310388		52.6564	53.4053	42.9701	37.0751	42.409	34.2423	42.6867	YBR036C
chrII	310496	311500		29.1928	41.1369	23.0828	21.5115	23.8483	19.8346	23.0947	YBR037C
chrII	311846	314976		39.3918	33.9256	20.6084	32.1533	35.5862	35.6196	35.7684	YBR038W
chrII	315483	316690		63.7309	51.7882	33.0115	51.3745	52.8868	54.5056	52.6127	YBR039W
chrII	318185	320434		20.7815	23.2201	17.6794	19.8752	21.6969	20.1151	23.639	YBR041W
chrII	320375	321671		27.6779	36.7224	20.3457	31.0328	31.5041	32.9622	34.7584	YBR042C
chrII	321757	324093		30.5399	34.9914	19.1507	32.7777	34.6907	29.8315	34.6928	YBR043C
chrII	324264	326141		26.0414	35.9518	25.1001	21.124	24.0813	20.0228	22.9782	YBR044C
chrII	330467	331583		13.7467	33.1943	18.0083	8.8427	5.88461	7.88224	6.92531	YBR046C
chrII	331823	332426		13.1025	26.4577	21.2152	14.1701	6.2824	10.7162	7.34939	YBR047W
chrII	332751	334022	2_RPG	254.337	45.1817	350.88	304.239	59.0552	252.796	47.6177	YBR048W
chrII	333993	336966		48.4814	61.6907	32.7189	55.1922	50.0322	50.1511	51.7821	YBR049C
chrII	338661	339422		38.5501	110.798	25.929	19.9175	32.0832	20.6576	35.7559	YBR052C
chrII	339554	340774		23.9293	51.0032	20.0109	12.8567	19.1438	13.8577	21.6699	YBR053C
chrII	342648	344498		32.8276	62.5433	16.3584	21.0406	33.7829	24.5858	27.3642	YBR054W
chrII	344476	347321		21.6474	22.1664	22.2942	20.2335	19.7759	21.0991	20.7347	YBR055C
chrII	347808	349422		17.6033	30.9103	19.0623	11.3529	12.651	11.6997	13.429	YBR056W
chrII	352070	353402		39.948	38.227	42.3764	33.6329	32.7752	30.5938	30.1683	YBR057C
chrII	353549	356038		21.8923	21.1803	25.6318	23.0299	23.4835	21.0274	23.8872	YBR058C
chrII	356151	356644		36.6418	37.653	35.254	58.8171	56.2609	53.0204	57.0155	YBR058C-A
chrII	356798	360336		32.9495	39.8802	23.6779	24.0257	26.2318	25.304	28.5474	YBR059C
chrII	360587	362631		28.4188	28.6016	24.8269	32.0296	32.0548	31.2478	30.6032	YBR060C
chrII	364656	365760	1_RiBi	34.3959	32.1624	33.1682	37.8646	41.2377	38.6368	38.1495	YBR061C
chrII	365870	366600		34.3565	49.4119	27.8021	38.9143	56.8555	44.513	48.733	YBR062C
chrII	369940	370972		37.1042	46.6031	60.0564	58.5645	52.2839	56.9249	44.3045	YBR066C
chrII	371982	372934		81.4709	121.481	154.066	53.4769	83.4045	50.1159	46.6488	YBR067C
chrII	373640	375751		220.929	228.999	127.894	194.607	198.754	187.124	164.117	YBR068C
chrII	376406	378537		111.564	110.012	34.0561	130.305	126.349	124.582	108.401	YBR069C
chrII	379159	379986		40.0153	55.194	15.7743	54.2701	72.5572	59.8949	67.4163	YBR070C
chrII	380327	381564		103.895	166.325	38.5106	74.4236	119.578	76.5737	109.502	YBR071W
chrII	381955	382841		15.398	55.6346	17.414	10.6627	14.8319	11.5486	20.247	YBR072W
chrII	383139	386052		32.2174	33.2831	30.795	34.5414	44.037	37.4097	46.618	YBR073W
chrII	386280	389333		22.0144	18.7741	28.1328	22.0815	23.4827	22.0142	26.1072	YBR074W
chrII	391586	392415		68.9061	92.3727	78.351	53.2566	61.2412	58.5133	56.7832	YBR077C
chrII	392946	395237		215.489	146.636	156.625	222.049	209.796	223.677	191.431	YBR078W
chrII	395294	398301		101.518	61.8824	112.133	87.27	81.1733	86.8047	88.5901	YBR079C
chrII	398439	400931		26.8759	29.9561	24.9504	24.6052	25.9775	24.3895	28.7412	YBR080C
chrII	401138	405396		21.9458	24.2901	19.3952	23.5075	26.8135	24.3833	28.5404	YBR081C
chrII	406459	407287		98.1771	207.159	44.9527	135.998	222.312	126.514	220.082	YBR082C
chrII	409121	410712		64.1479	60.246	60.6049	39.8254	33.2655	42.9145	34.7862	YBR083W
chrII	410970	414143		44.5645	33.2626	48.8065	49.0871	44.7206	48.0113	45.0789	YBR084W
chrII	414062	415492	2_RPG	278.659	42.9876	380.72	252.955	39.9029	212.947	40.059	YBR084C-A
chrII	415878	417089		8.38889	16.1751	31.5455	8.14218	10.301	6.7216	12.0767	YBR085W
chrII	418708	419263		40.7379	101.228	102.55	42.3034	91.4121	45.7032	70.0039	YBR085C-A
chrII	420077	423357		50.3931	40.648	36.667	42.2915	44.3368	40.2239	44.109	YBR086C
chrII	423734	424881		37.8835	28.6512	29.7376	42.6347	41.0991	40.2937	42.8239	YBR087W
chrII	424933	425827		79.1856	38.1727	55.9424	90.8385	94.129	87.4295	89.9613	YBR088C
chrII	426013	426911		60.1123	66.1703	35.0693	57.6164	70.6894	52.3727	54.215	YBR089C-A
chrII	427064	427524		43.8403	59.3878	43.6176	37.013	41.8385	38.0137	50.7656	YBR091C
chrII	427652	429129		61.6614	37.8726	52.0182	50.1197	55.2348	45.1721	44.1142	YBR092C
chrII	429490	430995		42.259	40.3731	49.2021	38.3864	36.9404	34.654	34.357	YBR093C
chrII	431969	434388		16.0547	20.3314	14.8257	20.4009	24.3537	20.849	23.5693	YBR094W
chrII	434393	435737		29.0403	30.1462	28.6737	33.5295	34.4517	33.671	35.5607	YBR095C
chrII	435929	436792		32.9418	36.8557	28.84	40.0598	39.452	41.9337	38.9892	YBR096W
chrII	436919	441484		12.8686	21.7767	13.9088	12.9591	14.915	14.8538	16.5445	YBR097W
chrII	441491	443805		20.5781	77.335	18.0233	22.0305	46.6857	22.8616	44.6407	YBR098W
chrII	443779	444764	4_HSF1	89.5499	239.994	37.2286	106.276	235.96	92.7772	191.385	YBR101C
chrII	444714	447400		24.9469	39.9437	27.7743	32.9918	51.2365	30.8755	44.4207	YBR102C
chrII	447542	449365		27.0717	21.2092	33.4408	25.7226	28.4102	26.9035	27.561	YBR103W
chrII	449546	450790		30.7889	25.7446	41.9862	34.3629	38.5711	34.2679	38.2925	YBR104W
chrII	450763	452037		27.8341	48.181	22.3703	21.064	32.2263	18.9333	30.9413	YBR105C
chrII	452618	453365		140.052	155.826	79.4884	131.25	160.806	116.169	132.998	YBR106W
chrII	453251	454584		39.9789	59.2649	28.5696	26.8372	33.865	27.4264	38.2875	YBR107C
chrII	454806	457809		18.5411	58.9903	15.7223	10.6898	13.4964	11.4607	15.7006	YBR108W
chrII	457723	458447		60.3604	68.0975	58.8531	65.0702	71.3331	61.7712	70.9046	YBR109C
chrII	458656	460331		21.5179	21.6112	29.5906	26.7549	24.8738	26.8079	26.2176	YBR110W
chrII	461102	461873		30.9827	42.0535	27.0403	30.9236	41.9758	31.9756	38.1793	YBR111C
chrII	462097	462743		29.3238	28.7102	26.3486	38.5292	41.4742	42.0326	47.0245	YBR111W-A
chrII	462698	465971		73.1988	53.5758	70.1832	52.3493	51.0884	54.4092	51.1266	YBR112C
chrII	467145	469710		17.0522	27.3021	19.0447	13.7036	20.7769	13.7856	22.3014	YBR114W
chrII	469697	474042		30.124	28.5549	41.7521	26.1498	27.5951	26.9929	28.8974	YBR115C
chrII	474262	476477	3_MSN2	17.7235	19.7238	20.3623	14.3862	14.085	14.2942	15.5249	YBR117C
chrII	477648	479138		787.185	423.013	966.399	367.519	285.099	354.844	313.819	YBR118W
chrII	479228	480469		34.9698	79.3251	34.7522	46.0853	43.2663	48.8777	47.0309	YBR119W
chrII	480368	480992		29.1847	68.2581	25.2144	36.7637	35.2615	38.7022	35.1555	YBR120C
chrII	481260	483459	1_RiBi	70.5649	46.5124	63.8494	73.6468	70.1189	71.553	67.3474	YBR121C
chrII	483772	484551		60.2792	57.5302	45.6727	63.4764	69.5004	61.2313	62.8996	YBR122C
chrII	484683	486758		23.2418	24.7199	16.2585	20.6247	21.4494	22.8071	22.6332	YBR123C
chrII	486959	488567		23.171	33.4602	13.2177	24.343	29.2903	24.9199	31.4723	YBR125C
chrII	488773	490498		55.1573	90.1919	58.8427	22.2035	26.7804	21.6972	28.651	YBR126C
chrII	491101	492889		64.6074	52.4847	67.8479	41.8817	41.7454	38.3747	44.9583	YBR127C
chrII	492958	494119		25.7655	28.6661	24.5119	25.7766	27.8387	27.0435	28.7405	YBR128C
chrII	494262	495387		23.601	31.8746	18.8092	22.6771	29.7339	24.0886	29.2466	YBR129C
chrII	495478	496937		38.2696	36.2505	27.9039	47.0192	53.6922	49.3301	50.1306	YBR130C
chrII	497118	499359		14.8246	16.0476	17.9304	18.3725	20.3767	19.6917	23.0485	YBR131W
chrII	499347	501593		14.1846	26.0448	18.5258	9.87018	16.0699	12.0131	18.8908	YBR132C
chrII	501682	504434		20.7546	23.9614	21.2073	18.3428	21.2326	19.246	18.2802	YBR133C
chrII	504744	505516		37.0078	32.3845	30.1128	27.7152	34.6336	30.3488	30.6372	YBR135W
chrII	505633	512906		10.2487	14.0528	15.0272	10.8512	12.3318	11.4515	12.1472	YBR136W
chrII	512907	513720		24.3292	21.7531	26.3254	24.8604	32.7415	24.5474	27.1173	YBR137W
chrII	513611	515408		17.2667	14.2644	12.8733	15.2271	17.8271	16.6272	18.6749	YBR138C
chrII	515652	517361		26.6786	30.9275	19.7378	13.7482	17.4403	15.2641	15.7676	YBR139W
chrII	517248	526917		20.5259	18.8028	21.5124	20.5257	27.765	21.4188	26.8676	YBR140C
chrII	526942	528070		30.6	29.9457	25.7133	39.4006	42.1439	37.8276	38.3242	YBR141C
chrII	528240	530816		26.0171	18.347	26.7814	46.4984	50.0084	50.8941	55.2325	YBR142W
chrII	530730	532270		88.5732	52.8476	89.1479	108.387	120.124	111.334	122.095	YBR143C
chrII	533705	534927		18.1528	20.1438	24.1735	14.5659	13.3616	13.778	13.5497	YBR145W
chrII	535170	536300		39.0083	33.9025	42.5733	33.6272	35.5451	34.5574	37.5932	YBR146W
chrII	539910	541124		36.0608	42.7536	39.2494	19.559	23.7425	22.0915	27.8562	YBR149W
chrII	541199	544523		21.7944	32.3233	27.3691	23.9689	33.5081	24.8142	33.8658	YBR150C
chrII	544865	546112		49.2938	50.138	71.1158	50.7451	57.123	60.1224	63.2575	YBR151W
chrII	548264	549131	1_RiBi	79.6097	62.5738	78.708	123.283	129.764	121.86	123.063	YBR154C
chrII	549673	551020		27.4881	33.5991	23.2723	32.2554	39.495	31.4767	46.7485	YBR155W
chrII	550924	553254		19.4727	33.9745	23.7588	17.3605	23.2249	19.3062	28.7426	YBR156C
chrII	556285	558348		120.649	67.4883	100.382	186.925	175.559	191.202	177.784	YBR158W
chrII	558620	559816		33.6398	31.9226	36.2991	34.0619	35.3883	35.4549	35.2515	YBR159W
chrII	559999	561070		41.6533	36.3085	45.1398	31.3117	35.2798	35.1626	46.5182	YBR160W
chrII	561406	563080		27.1691	24.56	22.8461	35.0877	42.8366	37.84	51.7177	YBR161W
chrII	562925	564807		105.194	59.9134	103.095	107.043	103.607	109.265	95.7726	YBR162C
chrII	565167	565517		95.7846	71.0227	87.7611	122.291	108.614	126.785	107.709	YBR162W-A
chrII	565607	567793		24.268	36.1297	25.7163	27.7892	33.9809	29.0867	46.3565	YBR163W
chrII	567753	568566		35.0908	40.4441	35.5128	31.0647	32.0747	35.5725	43.0935	YBR164C
chrII	568759	569731		29.044	31.7525	31.2564	33.3283	41.2982	34.8728	43.3871	YBR165W
chrII	569728	571242		25.9401	23.8847	34.3866	25.4867	31.01	27.0342	33.7053	YBR166C
chrII	571400	572139		37.1305	33.9173	50.0128	53.6745	54.9503	57.2887	62.788	YBR167C
chrII	572054	573810		14.537	24.5956	20.0801	16.755	21.1527	17.3286	24.1463	YBR168W
chrII	573744	576029		13.5283	47.1283	23.2335	10.4521	21.3859	11.1469	29.9423	YBR169C
chrII	576209	578135		27.7785	64.8714	18.3538	23.2674	45.4899	22.0462	47.8048	YBR170C
chrII	578314	579139		38.4287	43.8107	30.7401	48.781	61.9438	54.0563	61.2883	YBR171W
chrII	579048	581490		70.3275	57.1974	84.5143	69.7625	69.654	71.076	74.8388	YBR172C
chrII	581659	582214		74.0285	130.665	57.9971	50.7233	88.4987	48.9299	90.9222	YBR173C
chrII	582384	583467		32.294	53.9912	34.5007	33.1117	41.7831	30.4639	47.4989	YBR175W
chrII	583601	584804		19.4484	32.3079	21.4378	19.3926	24.614	20.3591	27.5664	YBR176W
chrII	584645	586234		30.812	36.0875	41.3791	27.7576	28.4998	28.6938	30.1923	YBR177C
chrII	586490	589178		19.5254	23.0766	23.6863	20.3798	22.698	21.42	26.1133	YBR179C
chrII	591608	592838	2_RPG	272.445	45.884	361.212	269.783	55.4019	240.594	51.8215	YBR181C
chrII	593230	595017		11.3187	16.324	48.5236	12.7172	10.3469	12.7325	10.4614	YBR182C
chrII	595982	597172		17.7794	33.3385	64.8177	10.5043	10.6946	12.8848	11.6224	YBR183W
chrII	597289	598975		7.03189	8.92561	12.1254	11.7304	12.0755	13.6633	12.3066	YBR184W
chrII	599080	600010		23.2386	25.4656	25.5137	22.4024	24.7603	18.3255	26.368	YBR185C
chrII	602499	603637		55.6993	36.8958	64.8734	68.0966	52.4129	56.3362	52.9477	YBR187W
chrII	603610	604205		34.9176	25.9782	37.104	39.9845	24.9558	37.0556	25.6935	YBR188C
chrII	604453	605579	2_RPG	327.668	42.5386	534.202	368.461	62.3732	336.505	66.4315	YBR189W
chrII	606247	607270	2_RPG	276.641	43.5146	384.314	292.486	47.3409	256.14	46.0019	YBR191W
chrII	607488	609057		29.3649	25.0038	35.0876	27.3507	25.0893	26.1169	30.8671	YBR192W
chrII	608620	609812		33.2761	34.5476	32.1393	25.59	25.707	24.7462	32.1336	YBR193C
chrII	609896	610620		27.039	32.17	29.1075	42.833	51.3559	45.5196	44.3573	YBR194W
chrII	610488	611927		28.603	28.5275	27.2792	23.6587	23.3174	23.2069	27.0188	YBR195C
chrII	612070	614007		189.256	186.617	251.287	171.652	159.282	169.33	162.923	YBR196C
chrII	614793	615890		74.0471	100.436	68.2914	47.1059	47.5498	47.7935	50.6033	YBR197C
chrII	616053	618600		41.029	49.7561	39.9501	40.7216	50.8337	40.1694	65.7227	YBR198C
chrII	618809	620433		37.5503	49.875	36.1423	28.3258	35.6768	30.7404	40.6007	YBR199W
chrII	620808	622784		17.9985	26.2874	18.094	15.6839	19.7968	16.3584	20.2911	YBR200W
chrII	623425	624337		17.3188	17.3713	16.2486	18.2568	18.1889	18.776	21.8574	YBR201W
chrII	624299	624739		7.41552	16.6044	18.3511	8.73805	12.5798	8.58775	13.8478	YBR201C-A
chrII	625706	628459		40.2805	30.2983	36.3071	31.5558	30.24	31.3593	30.3147	YBR202W
chrII	628972	631961		13.1772	16.8661	18.1245	11.6568	11.9135	12.414	17.0507	YBR203W
chrII	631997	633448		14.3419	19.6012	12.0275	15.096	20.0013	15.7764	22.6032	YBR204C
chrII	633574	635016		29.4987	33.8432	20.6716	23.6278	26.6638	24.0086	29.0972	YBR205W
chrII	635056	636662		37.0979	47.0908	25.819	36.3747	36.8069	37.6923	39.7459	YBR207W
chrII	636576	642305		19.6759	26.89	20.4977	12.3897	16.5557	11.3556	16.5226	YBR208C
chrII	645327	646194		18.1851	20.923	22.1312	30.249	32.2638	31.6746	28.7474	YBR210W
chrII	646045	647244		21.6442	29.106	28.7709	28.093	34.3128	28.4847	35.3983	YBR211C
chrII	647437	650112		20.4996	34.6834	22.9539	21.8389	28.6446	22.0301	31.1291	YBR212W
chrII	651335	653190		25.0707	41.4028	21.5789	14.6594	16.4849	14.8676	16.9552	YBR214W
chrII	653314	655435		23.2528	26.2131	26.0291	32.4647	36.3838	30.9915	46.8131	YBR215W
chrII	655302	657632		20.0861	18.8926	23.7736	20.3101	23.9904	21.0885	28.1264	YBR216C
chrII	657767	658614		21.8661	19.6346	25.1087	33.3443	38.9009	34.8234	36.312	YBR217W
chrII	658593	662391		33.9867	37.0592	68.5106	24.2548	29.0828	26.0459	28.2418	YBR218C
chrII	662868	664758		19.5064	23.9652	21.7055	15.4268	14.5868	13.6327	13.8659	YBR220C
chrII	664912	666486		41.562	49.0217	49.1914	30.8602	35.4763	28.6217	37.6622	YBR221C
chrII	666604	668392		22.2504	32.0381	44.9393	11.7298	15.2345	12.5506	13.7054	YBR222C
chrII	668402	670325		15.6663	19.6941	17.4646	9.05721	8.71915	8.51414	9.59557	YBR223C
chrII	670473	673479		16.1702	20.3917	16.2968	15.3935	16.7556	16.0056	19.0992	YBR225W
chrII	673462	675191		18.8417	25.2973	20.1383	23.2653	24.867	24.7753	26.7523	YBR227C
chrII	675312	676341		24.6695	25.8851	27.6224	26.9209	27.3209	29.6792	24.8677	YBR228W
chrII	676225	679247		16.965	27.1923	15.6835	14.57	19.9402	15.1496	24.5518	YBR229C
chrII	679384	680106		35.952	63.6438	24.7324	22.5691	25.5666	23.0735	32.9477	YBR230C
chrII	680283	680696		124.946	144.406	88.5816	114.007	117.887	112.959	164.436	YBR230W-A
chrII	682138	683146		41.2763	88.5003	28.5085	26.5983	43.2932	26.6291	42.2389	YBR231C
chrII	683348	684830		21.1396	25.6511	16.9607	26.8609	32.4009	28.526	36.3163	YBR233W
chrII	684933	685497		21.381	26.3017	22.5945	20.0628	22.7011	24.6491	24.8601	YBR233W-A
chrII	685396	686637		35.1203	45.5386	24.6234	15.5606	18.6587	17.0154	22.4157	YBR234C
chrII	686819	690355		16.0952	23.2121	14.0155	12.7974	16.5109	13.41	22.3212	YBR235W
chrII	690241	691742		27.1699	33.2974	27.2315	32.3199	39.0796	32.873	41.4409	YBR236C
chrII	691912	694682		16.2965	19.0686	18.7355	16.5165	21.2694	17.6556	21.8978	YBR237W
chrII	694605	697374		26.8811	26.031	25.3679	39.0687	51.6764	42.1492	53.9894	YBR238C
chrII	698289	700091		32.5827	33.794	39.314	24.4074	29.462	24.3036	36.3516	YBR239C
chrII	700483	702033		7.93247	13.1139	18.1191	6.41985	6.76179	7.40683	8.59372	YBR240C
chrII	702534	704083		9.39295	19.683	12.5325	4.02629	4.90606	4.50941	6.21648	YBR241C
chrII	704501	705454		41.1302	32.3059	59.9326	46.2487	57.5926	48.3651	51.5207	YBR242W
chrII	705238	706849		21.8819	23.2436	16.6355	18.3329	24.7673	21.4379	28.1199	YBR243C
chrII	707347	708138		22.4999	26.1754	20.949	29.281	32.8136	32.5736	37.9912	YBR244W
chrII	708040	711539		29.5916	23.1433	21.1796	30.3709	33.8557	32.862	34.848	YBR245C
chrII	711518	712883		31.7622	26.456	24.9182	34.8891	42.8502	38.1349	47.8614	YBR246W
chrII	712885	714536	1_RiBi	42.2399	29.2052	38.461	53.2218	63.8752	53.1385	66.3123	YBR247C
chrII	714720	716560		44.4753	40.3794	47.7147	35.0242	40.3554	35.6633	45.081	YBR248C
chrII	716769	718129		62.4882	37.4641	66.3452	67.7866	51.4551	62.2765	50.2972	YBR249C
chrII	721321	722431		32.3807	33.1836	29.4482	30.1366	31.0198	31.0384	38.3745	YBR251W
chrII	722566	723129		48.3245	43.0694	43.2503	49.493	49.3614	48.3061	49.4178	YBR252W
chrII	723208	723728		36.6821	31.5482	34.1762	47.1518	48.8528	42.6972	49.6844	YBR253W
chrII	723572	724279		28.401	24.6941	25.901	37.598	41.4021	40.5027	40.0733	YBR254C
chrII	724415	726641		17.9716	30.8586	17.1775	18.1116	22.1807	19.1057	24.9449	YBR255W
chrII	726518	727114		38.4522	76.3529	26.0375	48.8764	75.0809	45.4808	78.8183	YBR255C-A
chrII	727330	728109		36.6527	43.9418	33.6064	31.3446	39.0954	35.3248	44.7131	YBR256C
chrII	728853	729866		24.7517	25.1222	26.8387	39.3692	46.427	43.6943	49.5107	YBR257W
chrII	729670	730194		24.977	25.88	37.9112	26.1445	25.415	31.5584	27.8573	YBR258C
chrII	730326	732596		13.4533	16.9901	16.8363	14.8594	18.1458	17.8263	21.7119	YBR259W
chrII	732533	734675		20.7309	32.5881	18.5426	19.1123	25.3662	22.959	31.3715	YBR260C
chrII	734715	735572		35.0573	46.6484	29.3968	25.8956	31.3602	24.3138	28.6144	YBR261C
chrII	735634	736086		54.9834	52.971	55.9018	58.9404	59.0918	60.2207	58.7676	YBR262C
chrII	736178	737793		37.509	40.3742	37.1974	32.9186	36.5679	32.234	39.7629	YBR263W
chrII	737734	738406		31.4265	30.3836	24.7157	25.4692	30.5019	23.5941	27.399	YBR264C
chrII	738497	739678		47.9069	42.6251	39.1784	37.8354	40.0843	40.3976	38.1777	YBR265W
chrII	739823	741132	1_RiBi	53.7696	39.0449	54.9001	69.3467	75.0353	71.3783	78.208	YBR267W
chrII	741268	741726		33.4509	34.576	29.2313	24.5223	26.7426	25.0696	26.3448	YBR268W
chrII	742000	742596		24.9466	36.1	17.9615	15.4106	14.4143	16.2244	15.3264	YBR269C
chrII	742694	744669		15.3504	18.31	10.9369	14.098	17.4214	15.6215	19.2903	YBR270C
chrII	744811	746262		18.6386	14.3154	16.8714	30.9505	34.7681	34.8104	36.4566	YBR271W
chrII	746177	747849		16.9436	18.629	19.6636	17.9889	19.8519	17.036	23.5534	YBR272C
chrII	747962	749401		21.0397	29.1095	20.8908	14.2991	18.8124	16.8872	21.5113	YBR273C
chrII	749531	751371		14.3721	16.703	11.8281	17.2072	19.4946	18.1668	20.3253	YBR274W
chrII	751239	757179		17.5437	15.1421	12.7185	17.3046	17.9658	17.1614	19.1699	YBR275C
chrII	757542	760139		18.1688	17.8628	16.0694	16.9563	17.8057	18.329	20.1612	YBR276C
chrII	760246	760992		26.3741	33.1316	17.3116	36.0387	38.6302	38.1539	39.9608	YBR278W
chrII	761209	762739		39.6046	42.0329	31.3904	30.5417	38.9729	33.7507	35.0169	YBR279W
chrII	762678	764725		12.9816	39.8717	14.7473	9.95017	14.1225	11.4526	15.4549	YBR280C
chrII	764840	767654		19.5684	34.3885	14.3282	19.5779	18.5808	19.2953	22.3693	YBR281C
chrII	768192	768773		41.7661	48.9552	41.3546	40.2657	47.0381	46.9971	50.9677	YBR282W
chrII	768778	770636		66.6725	74.0148	80.2002	82.4123	95.4516	79.3128	97.1481	YBR283C
chrII	770868	773737		7.22032	28.7722	12.0428	5.7609	11.8007	6.65705	14.1869	YBR284W
chrII	773813	774428		8.86504	15.1738	6.14101	9.16498	9.57392	8.69392	12.0035	YBR285W
chrII	774686	776381	3_MSN2	58.336	64.1912	68.5868	40.3317	49.2565	39.2986	54.1548	YBR286W
chrII	776537	777966		42.1706	59.3612	48.2594	34.3108	40.4337	36.1244	41.8525	YBR287W
chrII	777813	779520		24.277	29.1941	35.3465	28.5175	32.2652	30.0524	36.7148	YBR288C
chrII	779604	782442		27.8021	28.8831	20.2129	20.7864	22.9485	22.4316	23.5537	YBR289W
chrII	782549	783658		42.1058	45.435	43.8343	40.7439	43.6408	42.8775	48.796	YBR290W
chrII	783626	784607		29.4824	33.3727	31.1504	25.3136	31.4261	26.4053	36.4067	YBR291C
chrII	787005	788647		21.3491	30.1029	20.8441	24.0178	29.4419	26.2305	30.9986	YBR293W
chrII	792779	796655		17.5678	21.023	34.4843	12.4113	13.1934	14.906	13.3521	YBR295W
chrII	796531	798600		2.99101	8.36196	5.2207	4.9568	4.81832	4.33189	4.90886	YBR296C
chrII	800458	802174		10.5162	14.6838	6.20813	7.57108	8.66576	8.69998	11.9328	YBR297W
chrII	802537	804900	3_MSN2	20.381	23.2792	5.97637	13.4126	14.8532	14.9444	20.7117	YBR298C
chrII	805262	807180		18.6139	24.291	15.0493	17.6481	18.4014	16.9562	22.2196	YBR299W
chrII	809006	809466		2.59296	5.94376	3.21165	3.06989	4.9717	3.48635	7.21226	YBR301W
chrII	810262	811501		6.35418	7.69734	5.51516	5.6422	5.51959	5.95749	7.05272	YBR302C
chrIII	9284	11173		7.31371	7.02907	10.9038	8.86008	9.37706	8.56876	9.44282	YCL069W
chrIII	12365	13029		16.567	14.1159	15.3056	24.3986	26.6282	25.17	23.9968	YCL067C
chrIII	15414	16939		25.531	28.8088	286.953	60.6367	80.5378	60.9057	88.9582	YCL064C
chrIII	17238	18612		43.6229	45.2975	35.2592	45.1046	46.7962	43.203	51.7472	YCL063W
chrIII	18672	22171		27.7935	21.7399	18.0731	27.3351	28.5723	26.4749	25.9881	YCL061C
chrIII	22322	23443	1_RiBi	48.7397	23.8806	34.2753	71.4729	84.0136	73.8613	84.3797	YCL059C
chrIII	23532	23991		69.9797	50.4898	54.6063	162.867	161.718	184.813	158.625	YCL058W-A
chrIII	23903	24386		71.7854	78.0048	52.2164	61.3293	74.5738	60.6313	69.1165	YCL057C-A
chrIII	24732	27033		34.5881	80.6312	17.0302	22.8012	42.5406	22.8488	44.6434	YCL057W
chrIII	26908	27651		37.3318	43.2949	37.2227	61.6158	72.8757	67.3827	68.3539	YCL056C
chrIII	27913	29020		75.1135	68.0354	50.3546	79.1643	80.1832	73.1063	61.7145	YCL055W
chrIII	31396	34045	1_RiBi	56.1088	49.6094	49.108	64.3313	70.6282	65.9756	77.464	YCL054W
chrIII	33972	35462		27.3205	41.8883	22.4667	28.0024	32.4411	29.7035	36.8207	YCL052C
chrIII	35555	37658		31.2052	46.6209	24.6895	25.7683	27.7289	24.7968	33.2645	YCL051W
chrIII	37719	38862		54.9987	91.1982	34.305	49.572	68.0874	43.6088	63.1323	YCL050C
chrIII	39588	40796		24.623	63.5702	32.1598	21.4539	29.526	22.7598	32.2415	YCL049C
chrIII	43571	44465		17.5985	22.4514	12.1347	17.4732	23.5381	19.7859	29.6345	YCL047C
chrIII	44562	46969		34.4031	32.6197	26.715	30.3274	33.174	29.8696	34.393	YCL045C
chrIII	47000	48440		45.5732	68.4051	22.3473	34.1121	49.5703	37.7274	49.6519	YCL044C
chrIII	48555	50257		140.206	253.207	45.9536	75.4133	108.116	69.9538	114.806	YCL043C
chrIII	50780	52520		54.8593	130.328	20.3877	7.18643	9.65949	8.85271	12.7763	YCL040W
chrIII	52624	54948		22.4583	38.5028	20.4199	19.3578	22.2193	18.3454	23.0099	YCL039W
chrIII	54813	56625		11.9412	21.3114	18.1836	11.3853	14.2406	12.6113	15.2486	YCL038C
chrIII	56743	58744	1_RiBi	142.288	61.0426	185.123	128.726	93.3369	117.975	97.1956	YCL037C
chrIII	58971	60815		52.2057	33.1297	74.9131	45.1725	43.2453	43.4219	49.5709	YCL036W
chrIII	60724	61236		43.543	55.4896	41.4486	38.9799	45.9301	40.0285	50.6827	YCL035C
chrIII	61601	62732		37.27	58.4157	24.3267	23.9735	29.7829	23.1702	31.4564	YCL034W
chrIII	62698	63292		18.4357	35.4977	17.6807	11.718	12.8583	9.80172	12.8965	YCL033C
chrIII	63363	64583		27.3069	37.7656	27.1762	28.1851	34.5106	29.5325	31.5011	YCL032W
chrIII	64571	65618	1_RiBi	76.307	66.5908	71.2893	99.985	108.054	99.6174	108.916	YCL031C
chrIII	65805	68392		31.6394	36.087	34.3457	30.3098	23.3116	29.3558	25.4347	YCL030C
chrIII	68436	69980		32.3543	32.6023	25.8467	38.7975	31.3369	29.0732	29.3778	YCL029C
chrIII	70066	71441		30.7029	44.1339	24.8188	18.1348	21.0053	19.15	21.6425	YCL028W
chrIII	73342	74020		9.41785	29.0717	8.31858	6.47991	6.53522	6.14773	8.5701	YCL026C-B
chrIII	75940	78022		85.5114	75.4617	22.1249	61.6396	50.4607	52.9321	38.6041	YCL025C
chrIII	79089	82340		21.2282	12.9875	6.73491	18.0109	19.7053	17.7032	21.0932	YCL024W
chrIII	91158	92564		82.5785	84.2286	42.188	62.0021	67.3902	46.4452	52.3624	YCL018W
chrIII	92621	94396		29.8214	48.627	29.6446	20.9818	22.0808	20.3793	25.3241	YCL017C
chrIII	94528	95794		24.6703	29.6546	23.9097	20.4344	22.5804	17.9561	19.5969	YCL016C
chrIII	96177	101266		23.5825	31.2455	16.0287	24.4158	26.2108	22.1796	27.2111	YCL014W
chrIII	101188	101871		23.317	32.1923	23.9924	25.681	37.1896	30.6157	37.7057	YCL012C
chrIII	104537	105580		76.7035	76.2247	54.5957	42.1188	38.6172	40.0195	39.8311	YCL009C
chrIII	105562	106863		48.5195	61.003	30.4955	31.0698	31.9903	31.9569	32.7721	YCL008C
chrIII	106997	107521		161.854	148.325	83.9184	342.636	368.094	354.224	387.359	YCL005W-A
chrIII	107966	108929		41.0358	43.3044	29.9352	47.7614	51.4205	49.2527	48.8796	YCL005W
chrIII	109026	110709		24.9495	29.5449	15.8671	27.4916	33.4527	29.4853	34.3604	YCL004W
chrIII	110548	111711		36.5062	38.4186	18.788	52.2407	55.0913	46.1524	57.252	YCL002C
chrIII	111837	112530		45.6226	41.1575	22.53	70.7803	72.6841	72.9892	65.1615	YCL001W
chrIII	117303	118402		40.4747	45.4828	32.1023	52.7979	53.7831	50.4152	50.3228	YCR002C
chrIII	118597	119263		42.2849	53.1969	38.8959	47.1749	49.0576	46.2175	55.1227	YCR003W
chrIII	119476	120559		36.7333	57.2456	30.3946	28.822	36.8664	33.3021	40.035	YCR004C
chrIII	128026	130558		38.5587	41.9718	28.2502	48.2718	52.1883	48.2624	53.6934	YCR008W
chrIII	130641	131622		47.5499	69.3658	34.2742	36.4199	44.3188	35.7897	44.042	YCR009C
chrIII	133665	137076		30.2776	41.1954	19.4204	28.0994	34.1916	27.6809	33.574	YCR011C
chrIII	137663	139163		564.041	1019.2	245.507	307.195	373.514	282.145	373.333	YCR012W
chrIII	141141	142545		66.5741	57.2067	49.0034	116.973	115.448	118.407	108.326	YCR015C
chrIII	143603	144664		40.0402	30.5474	31.2718	73.4217	89.9904	79.6303	93.7991	YCR016W
chrIII	144569	147700		26.3949	51.6058	23.9286	22.5887	24.174	20.6405	32.3781	YCR017C
chrIII	152688	154044		16.0807	41.1152	14.9257	17.2314	19.8173	18.8029	20.5315	YCR019W
chrIII	153934	154699		12.1911	22.17	14.7106	16.3314	18.5361	15.0417	21.0642	YCR020C
chrIII	154665	155113		28.0188	28.5004	24.4284	55.0382	66.2316	52.3722	61.6564	YCR020C-A
chrIII	155261	156052		37.494	39.2775	31.2351	66.985	85.9631	70.4711	85.8198	YCR020W-B
chrIII	155942	157221		14.5897	37.3464	18.6511	14.0742	18.8248	14.0604	19.5477	YCR021C
chrIII	158282	160472		33.4189	59.5799	25.2686	33.0007	37.3896	34.7936	41.9449	YCR023C
chrIII	160655	162240		23.1923	58.7462	22.4565	23.0171	24.4343	23.3116	25.9671	YCR024C
chrIII	162406	163301		328.694	137.253	217.412	410.019	340.59	433.762	286.285	YCR024C-A
chrIII	162418	163301		332.446	138.819	219.946	413.89	343.158	438.061	288.702	YCR024C-B
chrIII	163869	166424		38.3696	40.1371	33.8676	27.9675	30.3911	28.0979	31.9254	YCR026C
chrIII	166806	168207		23.9471	28.6074	16.2821	28.6244	28.4189	25.2061	27.0093	YCR027C
chrIII	170158	172541		24.9873	52.9205	29.2984	26.2201	29.1422	27.2112	32.9421	YCR028C
chrIII	172756	173526		43.2404	43.9245	30.1659	73.0467	75.3402	73.1305	69.9299	YCR028C-A
chrIII	173666	176536		31.2008	39.2161	29.2918	21.7806	22.6222	23.749	25.5813	YCR030C
chrIII	177397	178255	2_RPG	357.316	86.3588	476.423	369.818	115.022	328.352	111.882	YCR031C
chrIII	179452	186155		15.1347	14.7884	20.8553	16.5614	17.0135	16.593	18.8227	YCR032W
chrIII	186266	190277		47.9266	44.8265	38.8949	41.6296	45.7039	41.6166	45.9618	YCR033W
chrIII	190565	191804		62.5636	47.3901	51.354	60.2621	55.6562	59.3681	58.7771	YCR034W
chrIII	191639	193049		54.9458	44.3451	67.07	68.9399	79.6291	72.73	82.3314	YCR035C
chrIII	193244	194380		47.2432	70.5985	108.125	46.4042	55.9546	51.6082	56.4925	YCR036W
chrIII	194366	197228		29.4534	45.8862	28.1956	32.8297	30.4279	32.4116	31.3551	YCR037C
chrIII	197549	199549		14.0905	16.1622	16.2787	14.5506	13.7588	14.6055	14.3653	YCR038C
chrIII	199494	200189		16.4015	14.0739	15.2964	23.5713	25.7803	24.4298	23.28	YCR039C
chrIII	201155	205419		31.4326	30.9771	32.3391	32.5196	32.2588	31.4831	33.418	YCR042C
chrIII	206093	206702		51.9162	39.4789	48.5108	80.1286	70.494	73.5789	64.2575	YCR043C
chrIII	206778	207965		48.2335	49.2936	35.5778	42.8893	45.2937	46.0396	42.2402	YCR044C
chrIII	209803	210469		54.3781	46.5495	40.8156	29.1396	32.1035	28.6187	31.0466	YCR046C
chrIII	210570	211633		44.3533	35.1348	38.5256	27.3032	30.1079	28.7557	34.1857	YCR047C
chrIII	211877	213957		26.1247	33.289	31.4832	14.2059	17.8149	13.8415	18.1906	YCR048W
chrIII	214043	214873		54.1296	51.6828	36.9061	37.6683	44.2922	40.9818	45.0924	YCR051W
chrIII	214929	216656		46.1848	43.7419	42.2986	29.8372	28.9223	28.6459	28.943	YCR052W
chrIII	216592	218398		83.9804	61.9352	89.4078	72.0439	70.5521	69.4545	70.3331	YCR053W
chrIII	218307	220170		21.7669	22.9119	26.9347	30.9179	37.2663	33.9473	35.9865	YCR054C
chrIII	220342	223301	1_RiBi	52.0794	31.2079	43.0797	57.5011	62.6471	58.8744	64.4761	YCR057C
chrIII	223271	224248		42.7392	48.5349	42.0853	40.4322	43.3845	39.1835	43.7111	YCR059C
chrIII	224373	224858		21.7693	39.6428	29.9086	19.3103	23.974	19.3172	19.9231	YCR060W
chrIII	225504	227816		24.6619	82.7524	20.9495	10.6349	21.3953	10.1908	20.0659	YCR061W
chrIII	231449	233127		20.6517	32.5051	20.2745	22.326	23.6124	21.0441	24.9027	YCR066W
chrIII	233052	236440		30.7087	41.0877	18.5968	30.2313	37.9271	28.9142	38.7305	YCR067C
chrIII	238889	240108		36.1636	45.8649	30.9983	25.1065	28.5102	24.0253	27.6224	YCR069W
chrIII	240031	240591		38.412	39.4378	38.1942	48.0289	52.8403	52.7642	49.3213	YCR071C
chrIII	240727	242385	1_RiBi	49.3189	26.1078	40.0714	51.6805	60.7166	54.7236	69.1457	YCR072C
chrIII	242519	246647		18.7831	22.8931	38.9231	18.6234	23.792	21.148	28.61	YCR073C
chrIII	246925	248024	3_MSN2	26.7642	39.1366	18.5044	15.1306	19.5276	16.5642	21.1646	YCR073W-A
chrIII	247887	248844		17.2549	20.6902	11.9229	12.4851	14.3253	12.2704	16.0408	YCR075C
chrIII	248940	249284		23.6086	28.6005	17.4863	19.96	19.3284	21.1246	25.3328	YCR075W-A
chrIII	249017	250069		23.3988	29.3174	18.8748	17.2556	16.8823	17.9041	21.4852	YCR076C
chrIII	250111	252669		45.1863	42.4593	37.2863	34.737	36.1289	32.9247	35.9018	YCR077C
chrIII	252792	254284		34.5648	44.3942	34.8355	22.2269	22.2035	20.9796	24.8104	YCR079W
chrIII	258702	259378		46.1675	90.0393	32.4113	48.2315	85.7745	46.3825	77.9107	YCR082W
chrIII	259542	260016	3_MSN2	16.7724	46.0027	17.4499	16.4276	22.56	17.4341	16.0895	YCR083W
chrIII	260252	262713		77.4541	62.2539	56.1257	55.0229	55.0258	55.6036	56.6926	YCR084C
chrIII	263313	263993		36.0182	40.6597	32.2587	34.794	39.6693	31.5045	41.0803	YCR086W
chrIII	263801	264512		51.3137	37.1286	53.1033	73.9612	77.4128	78.7214	80.4262	YCR087C-A
chrIII	265021	266978		42.6693	43.4559	29.5513	22.6514	23.2248	23.0025	22.5889	YCR088W
chrIII	267137	272267		17.2132	28.6508	22.848	13.243	14.5194	13.9222	16.1131	YCR089W
chrIII	272247	272909		28.7735	35.823	32.8269	35.731	34.8809	32.5413	36.3239	YCR090C
chrIII	274340	276685		10.2993	15.3293	11.497	7.87001	9.3	7.99153	9.28745	YCR091W
chrIII	276607	279855		19.4054	21.5494	18.8191	20.0554	24.8334	20.2371	22.8414	YCR092C
chrIII	280082	286541		59.4503	50.0007	39.2926	61.732	72.6891	61.3557	56.1541	YCR093W
chrIII	286698	288213		20.0647	20.5442	16.5063	20.8857	20.9654	20.7289	22.0147	YCR094W
chrIII	288109	289314		20.7988	24.0554	18.2281	32.6025	39.7872	35.1561	39.1948	YCR095C
chrIII	293033	293713		19.5819	16.7934	18.2725	36.9757	37.1682	37.8605	33.4119	YCR096C
chrIII	293811	294340		36.6256	35.3586	38.443	58.9614	63.9947	58.7288	54.1072	YCR097W
chrIII	297041	298811		10.4836	13.2665	9.89509	17.8116	12.661	16.7601	12.8491	YCR098C
chrIII	304283	305536		7.58717	13.8079	11.1407	6.46991	12.533	9.74585	16.3223	YCR102C
chrIV	8612	10050		8.34082	28.6332	12.1104	11.4787	23.1792	12.1034	25.9031	YDL246C
chrIV	11541	13541		7.13912	7.73839	5.73698	6.83507	7.95717	7.91284	8.88264	YDL245C
chrIV	20520	21299		9.2675	18.442	18.0734	14.1111	23.6207	15.3932	25.8021	YDL241W
chrIV	22650	25909		24.8834	22.5462	18.6252	23.3925	25.6779	23.0998	26.2632	YDL240W
chrIV	26371	28919		11.3702	13.0873	12.2225	12.4946	13.8131	11.9154	11.7427	YDL239C
chrIV	28951	30494		17.0528	23.2201	18.7057	8.39975	8.53507	7.30688	8.67003	YDL238C
chrIV	30608	31910		22.4587	25.1767	20.9673	16.7128	17.288	16.6059	17.6923	YDL237W
chrIV	32228	33417		42.3509	43.6573	49.2927	46.6301	47.6877	46.6096	41.3857	YDL236W
chrIV	33286	34040		43.7442	38.9881	48.1881	67.4687	77.6547	74.233	68.294	YDL235C
chrIV	34145	36619		27.3956	35.2461	25.0173	26.8761	34.0642	28.6145	33.7449	YDL234C
chrIV	36774	38342		17.1299	24.3109	15.4926	16.2971	18.7493	18.549	22.8809	YDL233W
chrIV	38457	38882		51.1217	45.0753	37.6332	66.664	58.8487	61.7865	48.436	YDL232W
chrIV	38777	42354		35.0176	36.9532	27.2416	32.2198	34.3342	33.1049	35.1197	YDL231C
chrIV	42646	43767		19.7435	27.4612	17.4637	13.1206	15.1956	14.3103	15.4767	YDL230W
chrIV	44034	46014		282.028	107.213	369.255	201.888	140.336	188.999	138.972	YDL229W
chrIV	46311	48069		35.9693	30.1145	7.02428	43.8774	31.594	33.4814	19.9119	YDL227C
chrIV	50861	52203		43.8038	39.7277	31.3054	34.1461	37.8226	35.8988	37.2606	YDL226C
chrIV	52394	54244		29.7652	27.6665	24.8663	27.3202	31.8283	30.1263	33.3491	YDL225W
chrIV	54154	56718		42.8249	41.5289	31.9697	36.0377	42.0967	39.0896	41.0033	YDL224C
chrIV	57135	60489	3_MSN2	13.1348	17.6483	18.4747	8.84923	10.7752	9.24309	10.2481	YDL223C
chrIV	60647	61908		7.95174	14.5183	14.569	6.22651	8.20971	5.5027	7.2136	YDL222C
chrIV	62097	65037		14.7384	16.8611	12.2661	12.5594	12.731	12.8715	12.6175	YDL220C
chrIV	65187	65826		23.3286	17.7792	16.1274	39.3693	46.0662	42.759	32.2244	YDL219W
chrIV	66486	67491		7.9411	22.4498	11.4849	4.55775	9.97174	4.77458	12.0361	YDL218W
chrIV	67587	68777		28.6413	27.1621	30.721	28.7364	31.8131	27.8792	29.1961	YDL217C
chrIV	68679	70328		21.7986	21.8056	21.7127	21.6303	21.3293	19.7401	20.3831	YDL216C
chrIV	70486	73918		35.5267	32.6861	37.1299	34.9469	37.6706	35.4849	35.9127	YDL215C
chrIV	74404	76650		9.26922	21.5606	12.3365	6.50541	15.3873	7.24425	20.8389	YDL214C
chrIV	77165	78005	1_RiBi	41.471	27.3635	36.5975	63.595	76.3175	67.275	74.4746	YDL213C
chrIV	78359	79203		47.5275	44.1021	44.884	67.7205	80.7564	68.8986	72.3514	YDL212W
chrIV	79226	80490		29.5852	22.1117	24.708	28.5753	33.6995	35.1588	30.9548	YDL211C
chrIV	86074	87267		28.2287	22.6513	25.5878	33.3995	34.0291	31.687	36.719	YDL209C
chrIV	87467	88076	1_RiBi	119.56	69.2837	120.029	140.803	125.46	144.21	131.376	YDL208W
chrIV	88209	89939		31.8578	22.9184	29.3879	29.8057	32.3003	32.2497	32.6403	YDL207W
chrIV	90026	92480		11.1685	18.7598	13.2331	11.5292	15.2909	12.9285	17.4343	YDL206W
chrIV	92466	93928		37.8595	27.5762	32.4569	46.9322	48.7834	50.5071	47.874	YDL205C
chrIV	94591	95788	3_MSN2	19.5477	28.259	21.2361	12.4419	16.3115	12.3201	17.9654	YDL204W
chrIV	96045	98151		20.3729	22.2174	16.4338	17.3725	20.7807	16.7835	21.8632	YDL203C
chrIV	98412	99320		43.6637	38.0583	34.0621	47.4583	48.2165	48.1943	49.51	YDL202W
chrIV	99457	100506	1_RiBi	40.9585	31.8227	42.6701	53.3437	55.1453	50.4716	55.0904	YDL201W
chrIV	100430	101102		20.101	24.9143	21.5409	22.6344	26.0706	23.4019	24.7385	YDL200C
chrIV	101237	103378		8.81342	29.4371	13.2889	8.59093	9.70807	8.43258	10.6249	YDL199C
chrIV	103525	104667		42.2636	54.9923	28.8456	28.5331	25.9013	23.7081	27.947	YDL198C
chrIV	104753	106872		32.5993	38.2957	20.9933	23.503	28.2579	20.7922	27.9503	YDL197C
chrIV	107078	111173		54.7472	49.5406	36.6781	37.9192	41.5601	36.8082	41.0607	YDL195W
chrIV	111371	114402		8.01686	9.2739	7.03234	7.73623	7.05361	7.83102	9.94196	YDL194W
chrIV	114555	116020		39.3579	33.2166	33.4306	29.7551	32.8362	30.3256	32.9508	YDL193W
chrIV	116277	117141		141.109	81.5032	118.825	127.097	113.017	118.965	98.405	YDL192W
chrIV	117604	118618	2_RPG	241.833	44.6943	318.746	320.959	79.8295	286.48	74.1472	YDL191W
chrIV	118562	121786		29.8042	33.8338	31.3525	31.0284	22.8332	29.5889	24.8191	YDL190C
chrIV	121948	123684		30.5179	34.4251	30.464	29.9392	29.0682	28.6475	31.1782	YDL189W
chrIV	123780	125179		28.3201	36.0449	25.5673	19.8434	21.328	20.4317	24.5545	YDL188C
chrIV	125499	126504		33.4855	29.2846	51.6156	28.6778	32.321	28.5328	37.8	YDL186W
chrIV	126669	130132		71.2557	59.7329	88.4985	60.7072	53.0567	57.0999	52.1037	YDL185W
chrIV	130195	130563	2_RPG	531.93	208.788	587.19	773.974	550.043	785.246	579.018	YDL184C
chrIV	130813	131912		16.4118	19.6177	22.3508	18.8362	16.679	20.5991	23.1534	YDL183C
chrIV	133390	134816		81.2695	72.881	56.1903	65.8479	65.4184	66.2945	67.6349	YDL182W
chrIV	135015	135556		80.7819	81.4995	29.3013	63.2974	81.0516	77.9644	73.1332	YDL181W
chrIV	135763	137656		28.3783	39.6182	28.5825	28.9088	35.1838	31.0096	31.2619	YDL180W
chrIV	138179	139287		60.608	45.4585	38.3586	67.958	76.2153	70.3962	65.4711	YDL179W
chrIV	139496	141188		26.8927	34.1198	40.8639	27.1522	31.3504	27.1039	30.0587	YDL178W
chrIV	141110	141815		24.624	31.5153	30.3365	33.0584	33.5324	34.6095	32.6234	YDL177C
chrIV	141956	144334		18.5463	18.8206	21.0194	20.4146	21.2805	21.6451	22.7216	YDL176W
chrIV	144305	145550		30.7598	41.4718	29.5749	35.3566	38.4832	35.4336	42.3774	YDL175C
chrIV	145732	147690		37.7609	62.5759	58.432	23.8729	25.7221	23.711	24.5811	YDL174C
chrIV	148147	149114		38.9983	64.0694	51.9907	33.8968	39.1432	30.2963	31.5676	YDL173W
chrIV	149081	155928		46.3834	35.5745	71.501	48.4604	40.1636	47.9194	33.3992	YDL171C
chrIV	156289	158071		16.283	14.1395	22.5848	16.4889	18.0663	18.1638	16.0949	YDL170W
chrIV	157956	158775		4.87503	11.6825	5.50806	3.32333	3.88188	2.83701	3.40805	YDL169C
chrIV	159503	160818		24.3463	33.9272	27.6959	21.9875	31.8514	21.4236	34.3227	YDL168W
chrIV	160821	163212		38.1165	27.2096	43.2943	37.7109	42.5794	39.9933	44.5851	YDL167C
chrIV	163370	164115		47.9944	37.7128	41.8927	54.2298	56.5532	53.5597	55.8934	YDL166C
chrIV	164240	164901		34.783	32.5788	31.0021	39.0838	35.9831	39.0279	37.367	YDL165W
chrIV	164836	167266		28.076	19.1653	12.354	26.4737	25.2243	26.6036	27.1771	YDL164C
chrIV	167697	169201		56.3651	58.2062	31.9162	34.9375	41.3217	40.795	47.8912	YDL161W
chrIV	169167	169635		25.6136	25.2034	34.3035	30.7472	32.7168	32.4551	30.776	YDL160C-A
chrIV	169787	172217		49.1615	42.4854	45.2808	47.4112	49.7602	49.9867	54.657	YDL160C
chrIV	172434	174152		20.7301	30.176	23.9431	24.8068	33.1114	23.8574	31.0107	YDL159W
chrIV	174048	174657		28.9916	27.7774	24.9877	35.3449	36.6301	35.1762	35.1292	YDL157C
chrIV	174822	176563		27.939	31.5356	15.7058	23.2615	22.2659	21.9921	21.0926	YDL156W
chrIV	176632	178186		44.9694	31.5314	25.0646	33.2026	37.0529	37.8405	31.8646	YDL155W
chrIV	178300	181117		15.4744	26.8017	13.6176	14.0218	20.7175	14.2823	20.9929	YDL154W
chrIV	181135	183058	1_RiBi	37.7838	15.9249	38.8985	52.7998	57.3141	55.3962	52.9115	YDL153C
chrIV	183231	184708	1_RiBi	36.0682	21.2901	38.3659	39.9374	39.8371	41.6389	35.9337	YDL150W
chrIV	184901	188062		10.2051	18.2566	10.5536	9.55552	14.4494	10.0005	18.6877	YDL149W
chrIV	187933	190652	1_RiBi	35.3256	20.9858	39.2311	58.5499	67.4664	63.1993	65.729	YDL148C
chrIV	190864	192408		73.7084	89.6326	38.2546	83.5072	136.102	87.0697	126.32	YDL147W
chrIV	192593	194351		18.0483	46.1002	19.4903	19.5156	21.6062	21.1661	22.1044	YDL146W
chrIV	194407	198459		46.241	31.1104	36.8142	37.1836	35.3941	36.7399	27.0985	YDL145C
chrIV	198569	199782		39.6123	46.4442	28.3997	27.163	32.4563	26.7214	23.9359	YDL144C
chrIV	199955	201682		63.6752	61.7797	46.2389	59.9916	72.2285	57.8217	56.4693	YDL143W
chrIV	201574	202634		23.9886	25.9644	21.2913	20.9374	24.3442	21.0782	18.5899	YDL142C
chrIV	202799	205375		21.9851	17.7347	22.0732	20.6324	20.9547	21.6565	12.2598	YDL141W
chrIV	205255	211103		75.0426	56.1503	64.9338	65.397	69.5177	66.0817	36.179	YDL140C
chrIV	211271	212088		19.2173	21.6588	25.5567	15.2439	19.0304	16.4856	13.2462	YDL139C
chrIV	213067	215788		34.2733	41.3578	46.0017	30.7946	28.5886	30.3549	25.1326	YDL138W
chrIV	215998	217228		105.013	71.9716	113.292	100.129	56.4084	90.658	50.8883	YDL137W
chrIV	217566	218448	2_RPG	195.73	39.9129	266.379	257.792	74.4316	229.286	69.909	YDL136W
chrIV	218425	219332		54.5088	30.1219	58.1481	74.9928	49.2013	74.3876	45.3691	YDL135C
chrIV	219594	221307		48.8412	40.0277	51.8998	46.9961	39.927	46.9936	38.6398	YDL134C
chrIV	221521	221818	2_RPG	422.269	59.9891	498.653	739.254	363.436	763.103	339.402	YDL133C-A
chrIV	222270	223837		40.1256	34.9291	53.4909	35.4505	31.7855	35.7	29.8207	YDL133W
chrIV	223989	226941		25.5302	45.2024	22.6342	25.5179	39.6944	23.9076	40.4769	YDL132W
chrIV	227283	228819		63.7653	48.6486	61.0177	59.8519	47.5607	55.5864	48.1331	YDL131W
chrIV	229090	229595		32.7342	48.0106	34.4297	26.5739	20.6455	24.2365	19.0203	YDL130W-A
chrIV	229789	230622	2_RPG	362.306	50.7346	510.821	377.496	81.06	329.735	66.963	YDL130W
chrIV	230874	231978		32.4368	26.0466	37.7878	38.3709	31.575	37.8881	41.6313	YDL129W
chrIV	232535	234056		53.7837	41.558	47.5462	49.3858	47.4882	49.6724	51.1175	YDL128W
chrIV	234855	236025		55.4419	36.9613	76.6809	63.3874	66.0049	64.4438	57.1872	YDL127W
chrIV	236084	238743		84.6988	119.165	37.684	51.1784	92.3616	46.6742	88.2244	YDL126C
chrIV	238881	239815		101.971	148.596	50.8064	57.9171	83.6181	63.4601	87.7722	YDL125C
chrIV	240191	241270		68.9714	120.364	31.5696	36.2582	49.3263	35.6748	55.1985	YDL124W
chrIV	241355	242323	3_MSN2	41.6898	63.5848	47.4623	34.2427	46.6924	36.6633	48.5593	YDL123W
chrIV	242310	245069		46.0346	61.3175	52.191	57.4	61.794	60.8232	73.5156	YDL122W
chrIV	244930	245626		39.1241	41.808	34.8165	86.4133	90.5918	90.4996	104.167	YDL121C
chrIV	245826	246603		40.3835	35.0256	44.9314	35.1768	37.1713	40.6696	36.5552	YDL120W
chrIV	246534	247783		24.2395	28.6517	30.8542	24.784	30.3755	27.0335	30.3808	YDL119C
chrIV	248169	251374		39.5917	28.1324	32.5453	46.0997	51.7245	46.8284	49.8853	YDL117W
chrIV	251498	253803		36.8364	28.6778	28.2856	40.2527	43.0806	42.9453	43.8738	YDL116W
chrIV	253888	255174		26.6497	47.9925	19.4642	27.2654	38.3114	27.9465	44.0197	YDL115C
chrIV	256518	258640		19.5517	24.481	15.0013	15.8604	20.5636	18.1916	21.6408	YDL113C
chrIV	258834	263245		21.4758	21.3343	19.118	30.5468	38.4037	32.6125	47.4914	YDL112W
chrIV	263306	264178		55.1542	45.2725	42.2245	68.1512	79.2807	73.4224	74.3316	YDL111C
chrIV	264322	265020		46.8523	74.216	55.3148	27.7696	35.5274	33.49	34.9862	YDL110C
chrIV	265106	267542		18.735	24.2092	21.6941	16.3373	15.6049	16.6194	19.2802	YDL109C
chrIV	267674	268785		26.5722	30.3271	24.415	25.1878	27.1618	26.4232	27.4825	YDL108W
chrIV	268887	270130		25.1091	24.8044	23.6702	27.5818	31.3415	31.1085	31.6884	YDL107W
chrIV	270221	271964		32.4787	31.9299	27.0951	34.6304	35.1425	34.8447	37.5724	YDL106C
chrIV	272353	273644		22.9142	18.977	16.1894	24.4363	25.2594	24.7214	25.3316	YDL105W
chrIV	273608	274894		19.7295	17.8034	20.3259	17.7925	20.3355	17.5391	21.2786	YDL104C
chrIV	275030	276653		21.6348	21.9713	18.1836	18.8876	20.0201	16.9501	19.7041	YDL103C
chrIV	276777	280378		17.7718	20.6601	13.9903	19.5776	21.124	21.8917	22.6971	YDL102W
chrIV	280141	281908		21.7888	31.3105	11.6963	17.8905	21.2266	19.9722	20.8895	YDL101C
chrIV	282029	283211		58.8195	79.0213	37.22	60.9324	85.984	55.15	83.8731	YDL100C
chrIV	283302	284523		40.7389	53.9138	37.7141	49.8955	71.749	50.7747	60.4036	YDL099W
chrIV	284441	285174		20.0906	43.742	23.3696	21.28	26.9217	19.9484	26.7976	YDL098C
chrIV	285305	286752		70.8202	111.007	31.2994	49.0532	82.4809	47.2904	83.4192	YDL097C
chrIV	286978	289591		65.0729	42.841	35.3015	44.7614	44.792	50.1004	41.618	YDL095W
chrIV	289860	292412		17.4958	20.7839	15.8579	17.868	20.186	18.8222	19.548	YDL093W
chrIV	292748	293359		52.7562	50.591	47.6027	87.7224	82.7998	84.4326	76.4015	YDL092W
chrIV	293297	294852		19.6667	30.6691	20.41	16.7348	20.3102	15.4795	20.3371	YDL091C
chrIV	294986	296362		18.7986	25.5552	23.5688	16.5454	18.4131	16.4979	17.9103	YDL090C
chrIV	296520	298342		15.2341	21.5094	21.3787	17.0326	19.7184	16.0624	21.5007	YDL089W
chrIV	298262	300141		42.5798	40.8734	43.9322	38.7509	41.2235	38.0082	45.5929	YDL088C
chrIV	301373	302295		54.8639	63.236	97.6182	39.2656	44.6404	41.5122	44.1398	YDL086W
chrIV	302416	302748		27.072	31.955	45.695	34.9505	40.8511	42.3124	44.5539	YDL085C-A
chrIV	303184	304873		20.4485	29.5204	17.6338	15.9285	18.5251	15.7659	22.9348	YDL085W
chrIV	305052	306688		81.6009	66.2996	66.265	85.5727	82.1794	79.9203	84.4516	YDL084W
chrIV	306804	307871	2_RPG	285.588	39.4052	416.165	236.767	28.9519	204.37	32.0749	YDL083C
chrIV	308385	309526	2_RPG	216.813	50.0394	314.748	234.653	66.5176	199.062	65.8561	YDL082W
chrIV	309692	310234	2_RPG	271.137	73.8773	335.546	313.36	136.093	292.497	132.79	YDL081C
chrIV	310490	312665		36.0861	36.4178	42.0516	35.6434	27.8313	29.7289	27.8638	YDL080C
chrIV	312830	314766	3_MSN2	15.5727	30.5043	17.2942	12.3757	14.3317	13.8136	18.1638	YDL079C
chrIV	315272	316459		26.433	32.7693	24.7352	16.9189	18.4263	17.7334	21.8102	YDL078C
chrIV	316868	320253		13.4432	15.0641	21.5641	15.059	11.4014	12.9463	12.9227	YDL077C
chrIV	320461	321698		26.1942	25.5592	40.3843	21.5962	16.9639	20.2458	19.9476	YDL076C
chrIV	322194	323058	2_RPG	284.829	37.5239	381.708	364.26	70.8547	330.364	61.1912	YDL075W
chrIV	323952	326232		48.1954	44.182	42.4098	55.3977	58.128	55.5438	66.6256	YDL074C
chrIV	326426	329623		19.8938	21.7546	19.0279	25.9742	29.3934	27.3035	30.75	YDL073W
chrIV	329759	330517		58.2828	122.585	39.3402	53.3347	84.8663	61.19	84.2903	YDL072C
chrIV	330991	333099		108.156	134.122	62.7909	106.024	141.752	113.265	149.093	YDL070W
chrIV	333981	334453		75.6567	62.7108	49.2568	110.878	112.108	112.335	104.246	YDL067C
chrIV	334799	336264		41.0991	46.2185	40.5877	27.2429	31.8117	28.1931	33.3666	YDL066W
chrIV	336165	337317		35.8283	36.9617	34.5622	41.0112	44.1511	43.014	46.4288	YDL065C
chrIV	337443	338191		34.7669	35.7426	26.3922	56.1387	56.0376	50.8338	56.44	YDL064W
chrIV	338114	340234		36.9177	14.7715	37.1051	78.7746	79.7448	75.0036	85.0783	YDL063C
chrIV	340459	341219	2_RPG	256.607	50.7152	321.04	344.546	100.164	316.826	103.425	YDL061C
chrIV	341598	344105	1_RiBi	40.9739	24.3594	51.3817	46.9566	43.8397	44.0255	47.6865	YDL060W
chrIV	343976	345065		17.9628	34.4461	15.9721	13.6541	15.2138	13.3088	16.1678	YDL059C
chrIV	345609	351182		22.2237	23.6168	23.6328	20.9063	22.0067	22.6035	24.2669	YDL058W
chrIV	351398	352462		18.2555	25.8439	25.2866	13.4867	14.3871	13.0355	13.7782	YDL057W
chrIV	352761	355470		34.725	31.9991	30.4431	33.2656	36.5129	36.0362	39.4665	YDL056W
chrIV	355430	356907		302.676	185.935	156.419	317.156	288.893	315.882	309.921	YDL055C
chrIV	359736	361373		13.5295	26.0587	13.6192	11.5534	14.9462	13.0096	17.169	YDL054C
chrIV	361509	362365		39.7951	41.1035	43.9882	62.2107	68.2878	61.7438	70.2303	YDL053C
chrIV	362614	363634		69.6637	74.1219	53.5822	57.4032	67.7421	57.2717	69.4245	YDL052C
chrIV	363902	364882		84.4023	50.4351	71.5924	119.053	121.749	112.507	109.49	YDL051W
chrIV	364978	366002		28.0642	33.1694	26.9214	33.4334	31.9574	31.2239	34.9413	YDL049C
chrIV	366622	368319	1_RiBi	29.6162	35.2391	20.2621	23.7087	25.8861	24.4548	29.4368	YDL048C
chrIV	369526	371010		58.0334	49.2109	45.9084	54.7432	58.062	54.6235	54.4569	YDL047W
chrIV	371144	372039		65.7222	87.7338	63.8487	59.0348	68.0428	55.4305	81.7201	YDL046W
chrIV	372198	372654		50.978	53.9606	56.0257	68.8409	81.2636	74.5049	75.9364	YDL045W-A
chrIV	372628	373772		24.7256	27.636	22.5613	19.3904	24.7809	19.5837	24.684	YDL045C
chrIV	373885	375313		27.1409	28.0723	30.0614	23.9752	28.3352	24.6459	28.6238	YDL044C
chrIV	376594	378504		25.5453	24.2822	20.43	30.9999	28.6694	25.9746	26.6287	YDL042C
chrIV	378761	381496		30.5	25.8271	29.534	29.4075	31.897	31.2096	32.9191	YDL040C
chrIV	387374	388908		31.517	42.5041	28.2686	42.6162	48.9175	42.229	50.6636	YDL036C
chrIV	389038	392339		29.5044	32.8093	39.3635	30.2598	33.7822	29.3163	30.4096	YDL035C
chrIV	392477	393957		49.1439	68.6666	39.2563	40.9762	51.1394	40.9306	56.5044	YDL033C
chrIV	394154	397292	1_RiBi	32.4692	20.7578	29.7608	39.0708	46.012	41.9952	49.3036	YDL031W
chrIV	397456	399218		23.7137	26.7751	20.9743	33.9446	37.6406	35.4338	39.4494	YDL030W
chrIV	399305	400766		47.7796	58.446	33.0901	36.0295	40.0609	35.0357	43.3003	YDL029W
chrIV	400850	403465		27.867	30.2888	20.2303	26.1529	30.1477	28.2072	31.839	YDL028C
chrIV	403528	405001		19.0642	24.8256	15.2769	16.4633	20.0346	18.9525	21.3061	YDL027C
chrIV	405144	407414		21.759	31.0746	21.4844	16.8319	21.4441	17.1884	23.8726	YDL025C
chrIV	411749	413133		88.2448	86.1372	36.1357	31.8198	56.4263	36.2929	63.4088	YDL022W
chrIV	413927	414952		18.226	30.9238	15.8964	15.9645	18.8896	18.1959	23.783	YDL021W
chrIV	414965	416959		91.0586	311.105	40.6391	76.3226	165.086	69.1357	170.644	YDL020C
chrIV	417522	421725		23.3308	38.0777	21.0837	16.1169	19.2336	15.951	21.4381	YDL019C
chrIV	422644	423581		26.953	24.3519	18.797	31.6916	31.1256	29.3186	28.0904	YDL018C
chrIV	424098	425795		19.3252	22.1686	16.1646	21.7352	23.4582	21.8187	25.0323	YDL017W
chrIV	425775	426985		54.8246	52.4357	45.6374	58.3208	72.9192	63.0031	73.1079	YDL015C
chrIV	427213	428562	1_RiBi	171.914	82.942	175.483	153.201	140.477	153.102	147.144	YDL014W
chrIV	428928	431034		32.0569	32.9371	36.7401	27.3906	28.0775	27.7607	27.5112	YDL013W
chrIV	430954	431539		62.5171	72.1801	46.0132	48.3236	56.0221	53.8017	60.5363	YDL012C
chrIV	432284	433303		33.1309	31.6751	17.4252	40.5072	44.7221	41.7438	39.504	YDL010W
chrIV	433465	434134		73.5671	80.5688	56.8833	85.5262	87.7768	85.4502	88.5412	YDL008W
chrIV	437998	439443		63.8169	143.755	22.72	57.0658	117.941	58.7596	114.872	YDL007W
chrIV	439586	440870		35.882	55.2278	23.1985	38.3065	46.1849	38.6175	47.2853	YDL006W
chrIV	440782	442369		36.3329	48.29	25.0651	41.0529	50.6336	42.4595	49.411	YDL005C
chrIV	442956	443710	3_MSN2	72.0731	54.0177	25.9272	64.4523	67.7574	68.1749	68.3548	YDL004W
chrIV	444557	446500		68.75	34.853	17.5316	62.8282	73.758	63.4495	61.5701	YDL003W
chrIV	446679	447684		37.7195	40.5407	32.7227	42.645	45.2462	41.5733	42.0327	YDL002C
chrIV	447902	449393		28.4005	28.5189	19.1358	27.4741	27.7754	27.4378	28.6908	YDL001W
chrIV	450106	452742		35.2808	53.6075	47.0953	19.3764	24.4374	21.9599	26.0363	YDR001C
chrIV	452963	453835		92.9546	77.3501	70.1462	79.4925	81.164	79.2	73.3425	YDR002W
chrIV	454075	454819		43.9013	87.7341	29.482	33.0206	54.3702	34.609	53.9827	YDR003W
chrIV	455200	456811		36.3406	59.7733	28.1648	36.3049	43.3628	34.077	44.3563	YDR004W
chrIV	456666	458303		34.694	45.8347	24.9005	43.1539	44.4047	44.1496	46.2267	YDR005C
chrIV	458452	461396		46.5146	51.4419	31.6497	47.0185	59.9082	49.2283	61.0119	YDR006C
chrIV	461609	462656		50.4102	62.9194	27.5446	48.614	58.0797	47.5867	56.0256	YDR007W
chrIV	463279	465550		29.8675	85.1885	18.2882	32.9832	37.9669	31.6214	39.8804	YDR009W
chrIV	465578	470605		166.735	166.037	111.337	188.901	217.429	208.805	222.437	YDR011W
chrIV	471803	473020	2_RPG	326.674	130.209	368	217.993	168.948	194.787	172.045	YDR012W
chrIV	473139	473872		45.9065	29.7719	32.8236	47.1664	42.7042	43.917	42.0955	YDR013W
chrIV	478352	478792		32.981	34.0801	18.8883	24.7957	25.5799	27.7098	22.5436	YDR016C
chrIV	478943	482279		44.1745	34.1691	30.7438	56.5766	60.9475	52.31	58.411	YDR017C
chrIV	484005	485414		21.4462	22.4242	47.7067	8.75924	14.1011	7.18821	15.5958	YDR019C
chrIV	485451	486563		29.4319	22.9277	29.863	44.7669	52.2886	46.1776	53.7344	YDR020C
chrIV	486695	488055	1_RiBi	24.2713	12.8757	25.5816	43.5227	48.1835	43.884	51.916	YDR021W
chrIV	487965	488668		23.0693	22.3737	20.5545	22.8814	18.1333	21.0368	28.2892	YDR022C
chrIV	489432	491053	1_RiBi	88.6741	41.9351	101.897	83.6967	65.3199	74.2984	56.994	YDR023W
chrIV	491449	492413	2_RPG	332.513	47.6769	409.408	382.119	56.2209	344.758	51.0608	YDR025W
chrIV	492469	494416		37.0049	32.2123	41.0333	36.3399	30.6594	37.421	29.781	YDR026C
chrIV	494574	497447		27.4379	36.9459	25.2227	23.8805	31.196	25.4236	32.4279	YDR027C
chrIV	497555	501379		38.8685	38.9629	40.0005	37.4901	40.2189	37.2963	40.8291	YDR028C
chrIV	501638	503279		23.452	28.0929	21.4815	24.6647	26.9288	25.5492	32.3705	YDR030C
chrIV	503451	504011		14.8374	22.0921	15.4154	16.0301	21.5532	17.7133	27.6359	YDR031W
chrIV	503944	504762		29.116	52.3895	16.7897	15.0642	20.1204	20.9726	28.1887	YDR032C
chrIV	507777	509549		219.33	114.809	71.914	252.089	214.844	250.473	161.302	YDR033W
chrIV	509494	512250		38.5777	46.1048	46.6186	43.6616	41.2843	44.4643	46.1027	YDR034C
chrIV	521725	523148		43.7917	37.8749	47.4591	54.3799	56.0151	59.1189	61.4763	YDR035W
chrIV	523137	524783		24.2787	38.4832	21.5497	20.1369	24.7824	19.0792	25.9518	YDR036C
chrIV	525278	527282	1_RiBi	116.324	57.6922	152.565	128.289	117.452	124.427	99.5353	YDR037W
chrIV	527277	530791		27.064	33.2669	30.1139	23.7056	26.6224	23.0139	26.9675	YDR038C
chrIV	531187	534676		26.0602	32.7407	28.7518	23.2462	26.2038	22.1586	26.715	YDR039C
chrIV	534970	538894		20.913	26.7619	25.0745	18.2094	20.6956	17.2402	21.8214	YDR040C
chrIV	539759	540573		38.6696	41.902	28.5957	42.1747	49.3805	41.3256	55.8611	YDR041W
chrIV	542553	543569		59.2695	101.607	258.697	73.5391	60.6196	70.9559	68.0631	YDR043C
chrIV	546388	547765		24.4364	22.8745	54.6682	21.386	26.7176	18.4372	27.1442	YDR044W
chrIV	547839	548467		38.0973	28.999	30.1727	44.7628	51.7637	48.1595	51.624	YDR045C
chrIV	548682	550668		80.5678	111.662	25.6918	66.9538	70.2952	72.9058	86.6524	YDR046C
chrIV	551389	553027		68.532	71.7208	33.741	61.2674	66.3978	65.1884	64.335	YDR047W
chrIV	553224	555249		26.152	40.4825	20.6415	26.7983	30.3491	27.8752	30.3521	YDR049W
chrIV	555646	556500		452.314	431.853	341.702	318.4	334.676	303.109	350.387	YDR050C
chrIV	556993	558104		40.2996	48.1984	33.3224	33.3394	38.4351	33.0013	41.0629	YDR051C
chrIV	558263	560777		40.5361	32.9562	30.0704	41.2148	42.0198	41.0481	42.6508	YDR052C
chrIV	560970	562528		51.1015	50.6126	48.0285	61.0866	62.9987	55.7036	62.8825	YDR054C
chrIV	563446	565020		73.7921	61.8955	95.9552	48.3429	49.6487	53.2906	55.7372	YDR055W
chrIV	564917	565750		39.1921	40.102	31.7357	39.9057	39.8528	38.7978	45.9464	YDR056C
chrIV	565877	567633		17.3683	21.2265	19.737	19.0226	19.229	19.25	20.8967	YDR057W
chrIV	567588	568734		8.20073	12.4518	9.88771	11.157	12.1665	10.3133	15.9955	YDR058C
chrIV	569094	569824		18.9687	58.1152	17.6562	15.9157	31.9089	16.7895	31.9047	YDR059C
chrIV	570553	573815	1_RiBi	51.6245	31.5955	45.0722	72.6267	79.594	73.3572	92.1824	YDR060W
chrIV	574107	575894		24.4073	26.5392	27.6817	22.814	22.8327	20.7975	28.3726	YDR061W
chrIV	576067	578447		43.0173	31.2243	49.0205	43.909	41.0065	42.669	41.1516	YDR062W
chrIV	578533	579242		59.4194	30.2772	74.9851	83.0424	52.0793	79.4477	48.7927	YDR063W
chrIV	579358	580549	2_RPG	427.348	56.1206	593.504	438.552	123.578	394.689	108.427	YDR064W
chrIV	582707	583535		31.4095	26.448	37.0274	36.8428	39.3948	36.4542	42.8387	YDR067C
chrIV	583658	584819		25.3253	27.3549	31.7221	30.3508	32.8165	29.1857	36.9882	YDR068W
chrIV	584636	587780		17.9658	21.0246	26.8343	18.093	24.7222	18.8184	31.7189	YDR069C
chrIV	588020	588456		25.3792	30.2832	25.7679	27.5454	40.3834	31.4879	38.6942	YDR070C
chrIV	588743	589542		48.5113	53.8046	37.8987	59.888	72.2687	57.2554	73.4256	YDR071C
chrIV	589662	591538		63.5021	74.927	41.5818	48.5608	57.5127	51.0667	60.8532	YDR072C
chrIV	593676	596825		49.0203	60.8169	40.1561	22.0237	24.096	22.7408	24.8555	YDR074W
chrIV	596951	598245		26.9703	20.7431	22.6498	30.1695	35.3474	32.094	37.2416	YDR075W
chrIV	600726	602135		349.483	331.216	1165.71	181.476	170.649	242.477	200.134	YDR077W
chrIV	601868	602884		63.263	64.1463	155.645	63.1349	70.4372	76.2862	86.7756	YDR078C
chrIV	603028	603690		28.4822	25.382	31.9952	58.4169	63.8081	61.1495	66.9359	YDR079W
chrIV	603378	603884		28.37	27.2315	33.8323	47.8581	47.2559	52.4766	54.2457	YDR079C-A
chrIV	603974	607158		12.7609	13.4675	14.842	17.4223	19.3377	17.5307	21.1387	YDR080W
chrIV	607160	610166		23.2515	25.4203	25.241	28.3681	32.039	28.2936	37.5769	YDR081C
chrIV	610347	611981		25.3675	21.3401	24.5792	30.9495	33.2808	28.7729	34.5971	YDR082W
chrIV	612049	613367	1_RiBi	31.1602	22.7777	30.0026	43.2012	53.5169	41.8564	53.4339	YDR083W
chrIV	613201	614072		26.1132	25.0445	22.0787	26.1477	33.5921	25.9618	32.2942	YDR084C
chrIV	614198	616294		15.433	24.862	35.3583	12.1377	12.6665	12.9691	11.7712	YDR085C
chrIV	616730	617289		76.1849	51.951	87.8008	125.474	124.602	134.007	122.737	YDR086C
chrIV	617375	618364	1_RiBi	51.7863	34.8391	50.2507	76.7478	83.1447	76.9395	85.9979	YDR087C
chrIV	622067	624813		25.7786	31.3739	16.8137	20.648	29.2754	19.3769	27.2365	YDR089W
chrIV	624824	626116		25.7272	33.4207	25.6076	32.9841	41.6177	32.1008	42.0309	YDR090C
chrIV	626372	628604	1_RiBi	60.4015	33.2132	55.134	61.4831	64.116	61.3298	65.2679	YDR091C
chrIV	629840	630700		50.7905	77.0594	36.6345	47.8023	63.8564	47.5394	61.6995	YDR092W
chrIV	631014	636173		33.7244	27.8073	26.0626	29.2522	30.7724	28.9887	32.4297	YDR093W
chrIV	639942	643928		22.3547	18.9795	9.06004	23.043	24.1226	21.6506	26.3084	YDR097C
chrIV	644126	645035		45.8966	39.4656	38.312	56.6122	71.0327	59.5671	66.0704	YDR098C
chrIV	652780	654650		65.9501	96.1553	59.6939	65.1959	92.6642	66.8962	99.7503	YDR099W
chrIV	654968	655571		23.9218	37.2388	21.6158	23.0271	27.0458	21.8934	30.5163	YDR100W
chrIV	655565	657492	1_RiBi	53.6078	30.0358	47.29	64.3448	72.2694	64.8151	78.3511	YDR101C
chrIV	658303	661142		29.1162	31.1146	27.4479	26.2465	31.5667	29.0814	35.9378	YDR103W
chrIV	661026	664946		11.2982	16.5082	13.5086	11.7598	14.3557	13.0922	17.7915	YDR104C
chrIV	665249	666841		16.6191	21.9465	15.397	15.5256	16.6567	15.0158	17.3098	YDR105C
chrIV	668873	671059		27.1761	80.511	29.6909	25.4902	44.6564	24.1959	61.0802	YDR107C
chrIV	671200	673412		17.5276	62.4334	16.4724	17.8854	26.9343	21.1481	44.7216	YDR108W
chrIV	673399	675667		17.7148	21.3655	16.662	15.8586	18.2717	14.3707	20.3072	YDR109C
chrIV	676045	678008		23.2028	19.5852	22.1315	29.9228	35.0815	29.9178	39.1214	YDR110W
chrIV	678009	680015		18.4582	15.3509	23.1766	32.6784	31.0324	39.3527	35.5776	YDR111C
chrIV	680419	681717		33.0545	28.395	30.3123	27.4654	26.5448	25.3952	26.4706	YDR113C
chrIV	682117	682612		35.0757	40.534	31.6171	37.6225	44.6657	41.2537	38.2269	YDR115W
chrIV	682599	683614		36.2497	33.7969	29.7017	30.9593	31.8919	29.6863	32.554	YDR116C
chrIV	683898	685687		19.7147	19.6944	17.8737	22.7132	22.3838	21.8624	23.3236	YDR117C
chrIV	685850	688032		20.54	19.9697	19.6076	25.0742	27.3261	27.6235	29.167	YDR118W
chrIV	688116	690615		39.691	40.9807	56.746	49.8723	50.3062	45.96	52.8723	YDR119W
chrIV	690964	691460		17.9126	22.0732	70.3966	22.46	21.329	18.61	19.4557	YDR119W-A
chrIV	691332	693261		30.4823	15.6988	35.6203	42.8382	42.8809	41.5802	41.342	YDR120C
chrIV	693440	694283		30.1132	31.2413	26.6429	34.8111	39.1854	35.9786	42.3102	YDR121W
chrIV	694381	698104		26.5658	39.2969	16.4838	17.9101	25.0015	18.481	27.1248	YDR122W
chrIV	698024	699506		24.6972	25.8864	14.8558	33.3448	36.6505	27.6789	31.6925	YDR123C
chrIV	704378	709303		39.1095	21.5103	34.0102	29.1447	24.7955	28.6889	23.9982	YDR127W
chrIV	709503	713206		18.8557	15.7042	16.1748	18.5323	22.0611	19.9749	20.3709	YDR128W
chrIV	713192	715450		43.6578	46.5125	39.2371	33.8258	44.1172	37.3319	41.4217	YDR129C
chrIV	715459	716648		32.8989	29.2952	21.5274	31.9371	34.3687	32.6898	30.5529	YDR130C
chrIV	716703	718557		14.5837	16.125	17.0341	18.3209	22.7752	19.804	18.5036	YDR131C
chrIV	718697	720422		21.1257	33.7216	23.4372	25.7297	30.7703	28.918	29.7196	YDR132C
chrIV	722911	727592		29.3204	20.6845	34.7228	27.6739	34.1425	32.1699	32.3303	YDR135C
chrIV	728152	730388		20.7896	15.0462	20.0662	23.8256	24.0429	25.0427	22.1939	YDR137W
chrIV	730543	733490		25.6264	28.3169	27.6539	29.6577	38.2122	32.2576	38.4506	YDR138W
chrIV	733442	733978		31.4656	33.8235	26.7817	42.6465	56.1814	43.5158	45.9433	YDR139C
chrIV	734122	734852		27.3341	23.393	24.7536	37.1541	44.3905	37.8961	32.6526	YDR140W
chrIV	734724	740099		21.0004	21.3351	21.9356	22.6522	28.6316	23.3543	26.5723	YDR141C
chrIV	740357	741746		19.9549	21.1592	20.7169	25.6926	26.7322	26.78	24.8218	YDR142C
chrIV	741961	744045		36.4651	32.5306	34.6666	30.1047	30.7521	32.1377	34.2052	YDR143C
chrIV	744225	746261		40.8366	28.951	29.3833	47.9745	48.8655	45.5903	49.8419	YDR144C
chrIV	746648	748390		37.5671	40.4512	28.7828	35.2015	41.3776	38.4047	41.2663	YDR145W
chrIV	748612	750911		35.2233	27.6668	17.4115	28.7997	32.643	31.8994	31.9863	YDR146C
chrIV	751558	753400		19.8089	17.9853	13.9441	22.3239	26.1301	22.8434	27.403	YDR147W
chrIV	753395	755327		29.8143	29.6354	20.2203	25.17	29.4909	26.8123	31.4935	YDR148C
chrIV	755558	763923		21.3972	22.0224	14.4174	19.0939	22.9037	20.0782	22.2845	YDR150W
chrIV	763919	765317		56.8832	87.985	37.2217	74.066	92.5993	68.9115	83.9338	YDR151C
chrIV	765628	766560		66.3349	58.4061	51.4183	78.6837	94.0115	86.1471	95.0471	YDR152W
chrIV	766611	768048		58.4521	69.2446	51.5567	70.4038	72.0658	69.1094	65.8212	YDR153C
chrIV	768402	769094		262.133	583.522	84.1261	213.376	392.254	179.561	406.351	YDR155C
chrIV	769467	770032	1_RiBi	100.768	114.738	75.9811	111.023	122.85	109.791	129.921	YDR156W
chrIV	770316	771577		72.2724	59.8151	61.5808	51.85	49.0555	48.76	43.7566	YDR158W
chrIV	771778	775841		20.2024	20.0423	19.7057	24.6349	28.3303	26.8222	30.4098	YDR159W
chrIV	775979	778772		16.5048	20.0321	19.1205	15.9879	19.8886	16.7809	18.7442	YDR160W
chrIV	779000	780286		28.6919	20.6753	30.1349	29.6147	33.9714	30.9671	39.8423	YDR161W
chrIV	780211	781230		26.7675	32.0897	31.6533	36.5874	41.4254	42.1648	45.3461	YDR162C
chrIV	781348	782055		28.5696	31.2815	32.7227	30.5646	35.9948	34.6189	33.1349	YDR163W
chrIV	781927	784265		18.6877	19.2698	18.662	17.8194	19.7007	19.0646	22.0075	YDR164C
chrIV	784827	786295	1_RiBi	40.4768	28.642	44.6281	64.9399	77.2396	65.6238	82.215	YDR165W
chrIV	786194	789292		21.3401	22.7362	21.0816	26.6186	33.174	26.8588	43.7006	YDR166C
chrIV	789412	790170		41.5521	42.0244	41.0213	39.7972	37.4569	37.1505	41.1315	YDR167W
chrIV	790286	791926		29.2549	36.7754	26.0487	26.8421	35.7426	27.087	37.1471	YDR168W
chrIV	792106	794253		23.1423	34.4426	19.8599	18.0768	21.9673	18.8378	27.4243	YDR169C
chrIV	795993	802438		28.0839	23.8503	20.9756	26.9317	27.9446	27.7181	29.0417	YDR170C
chrIV	806533	807833	4_HSF1	33.3063	409.636	11.9247	11.5724	70.4765	9.9076	77.1982	YDR171W
chrIV	808249	810558		94.8509	79.8377	93.3993	91.6183	90.5179	88.1125	91.4772	YDR172W
chrIV	810494	811697		29.3027	42.8848	23.7086	28.0666	35.247	28.7896	37.9201	YDR173C
chrIV	812073	813022		130.34	114.249	148.877	137.583	102.613	113.723	76.4095	YDR174W
chrIV	813072	814209		31.9678	39.075	33.0127	38.0293	36.7506	36.3083	39.5049	YDR175C
chrIV	814402	816829		37.2949	42.8868	28.3679	39.1915	48.8519	42.9109	46.9521	YDR176W
chrIV	816836	817588		38.1641	57.7261	21.3763	36.9584	53.9967	38.7995	51.9364	YDR177W
chrIV	817827	818665		25.9746	27.259	12.4733	13.6952	16.8213	14.6432	20.4296	YDR178W
chrIV	818582	819229		12.9574	11.2847	7.96623	23.6715	29.2095	24.3664	30.7141	YDR179C
chrIV	819330	820976		14.2193	16.4323	13.3986	21.853	22.6824	21.2048	24.534	YDR179W-A
chrIV	821150	825825		13.1488	19.9678	10.4422	17.0299	28.2895	19.4086	30.1735	YDR180W
chrIV	825767	827383		21.9674	25.264	21.1054	20.5682	25.0342	21.24	24.7141	YDR181C
chrIV	827527	829170		23.7637	25.1492	22.334	26.6943	31.1806	27.1813	29.6001	YDR182W
chrIV	829513	830324		20.6647	23.3829	23.969	24.2871	30.9455	27.5379	26.631	YDR183W
chrIV	830388	831612		35.523	26.645	35.6454	85.7728	91.5255	85.8405	96.2475	YDR184C
chrIV	831728	832585		34.7042	36.5557	30.793	43.6848	48.1278	45.0034	41.1604	YDR185C
chrIV	832735	835682		48.117	46.4797	69.113	42.4863	49.2157	44.8376	52.7757	YDR186C
chrIV	836371	838225		85.0443	97.757	59.296	46.5247	59.7003	51.1871	62.3958	YDR188W
chrIV	838326	840487		26.4398	29.2082	22.2013	20.2604	23.1946	22.746	24.4002	YDR189W
chrIV	840500	842054		59.5404	42.6669	49.2812	58.8788	61.6453	60.1888	68.7918	YDR190C
chrIV	842291	843557		19.6472	21.7549	19.2736	17.5748	20.4671	19.3987	20.7755	YDR191W
chrIV	843474	844938		17.1283	18.8356	17.2954	11.8245	15.2599	14.3487	15.4125	YDR192C
chrIV	845796	847978		45.8415	59.3014	52.67	51.1923	77.9998	56.2287	86.5773	YDR194C
chrIV	848358	850275		22.0953	30.916	28.4457	29.115	33.0764	24.8554	36.0103	YDR195W
chrIV	850189	850999		23.5699	26.8408	28.2102	23.6505	29.3791	20.4325	31.667	YDR196C
chrIV	851193	852527		20.1896	21.7965	27.2065	21.0938	27.8437	22.9003	33.1772	YDR197W
chrIV	852490	854024		19.2028	18.8043	30.7308	26.6012	26.2705	24.688	28.1855	YDR198C
chrIV	854145	856170		16.421	18.2343	14.8731	16.2278	18.4464	17.3415	18.8822	YDR200C
chrIV	856268	856964		18.0743	17.7893	17.3475	17.114	19.6788	19.8451	18.678	YDR201W
chrIV	856864	857982		16.8687	23.1653	20.4255	13.8229	16.836	15.5248	17.8176	YDR202C
chrIV	858095	859251		17.8751	24.1743	20.2487	13.3486	13.1422	13.4342	16.1336	YDR204W
chrIV	859312	861617		19.5938	20.3359	20.7245	16.4116	20.3745	17.3579	22.6971	YDR205W
chrIV	861705	864938		24.8728	26.42	27.8309	29.2651	32.93	31.692	39.0882	YDR206W
chrIV	864816	867588		18.1135	38.922	15.5098	13.2592	18.167	14.4706	19.0977	YDR207C
chrIV	868053	870698		46.7398	37.172	45.3139	41.732	40.9765	43.3149	44.7392	YDR208W
chrIV	871040	871484		70.9724	64.5629	74.7359	89.3216	112.571	98.2253	115.532	YDR210W
chrIV	884646	887020	1_RiBi	38.0336	30.154	45.6835	39.944	44.8135	41.5475	47.8593	YDR211W
chrIV	887146	888998		45.5929	49.7271	35.9991	37.5326	51.1962	39.6213	50.9202	YDR212W
chrIV	889530	892732		30.5907	53.2979	20.6607	41.7509	61.9426	43.2074	57.8481	YDR213W
chrIV	892732	894023	4_HSF1	57.4331	117.848	15.1846	49.764	127.499	42.5038	120.062	YDR214W
chrIV	894508	899220		9.34466	36.8382	4.61767	9.12678	40.1525	10.9343	22.8465	YDR216W
chrIV	899281	903535		16.5395	17.0314	13.4763	20.1132	21.6675	20.7122	19.0055	YDR217C
chrIV	905038	907097		25.4481	20.7833	16.7477	29.2362	29.6393	30.8186	30.6831	YDR219C
chrIV	907299	909683		32.2655	31.2634	20.5511	27.3011	32.3181	29.3299	33.6495	YDR221W
chrIV	914198	914744		366.996	475.14	384.906	416.95	441.864	438.353	438.103	YDR224C
chrIV	915406	916088		363.733	397.652	437.923	383.519	365.317	388.449	375.849	YDR225W
chrIV	916415	917282		85.1344	62.0842	72.1831	86.6024	83.6704	78.34	74.3604	YDR226W
chrIV	917444	921839		17.5081	31.6072	16.7483	17.6824	20.4569	19.0825	21.3988	YDR227W
chrIV	921852	923894		29.1096	35.6768	25.6626	32.2128	35.772	37.6677	41.8994	YDR228C
chrIV	924682	926201		28.2187	33.0639	23.0503	17.6259	19.5448	17.668	19.9819	YDR229W
chrIV	926136	926940		29.0142	41.4409	20.366	15.6144	22.2417	16.3662	24.1138	YDR231C
chrIV	927190	929274		52.2404	43.6196	47.6821	37.8293	45.1714	43.2585	49.0307	YDR232W
chrIV	929321	930427		136.608	89.8095	133.281	148.685	145.862	138.994	133.583	YDR233C
chrIV	930923	933320		33.8026	21.5791	38.0141	36.4514	35.5603	37.4738	33.4459	YDR234W
chrIV	933471	935221		21.2034	19.3147	22.2349	27.0873	32.1405	30.3207	34.8493	YDR235W
chrIV	935139	935915		25.6565	25.4914	25.0938	20.4872	22.5388	20.1798	24.8099	YDR236C
chrIV	936471	937612		26.8419	28.4511	26.0933	23.8228	23.0128	23.9086	27.405	YDR237W
chrIV	937616	940874		48.3239	34.7022	40.4737	44.5789	43.7008	43.213	47.6003	YDR238C
chrIV	940978	943443		16.9349	16.2096	17.306	16.2372	18.7465	16.2438	21.3369	YDR239C
chrIV	943614	945170		19.6999	15.0733	20.4009	20.2849	22.4356	20.9343	25.4334	YDR240C
chrIV	946698	948597		16.4632	20.233	24.1204	16.6985	19.711	16.9078	22.2237	YDR242W
chrIV	948499	950314		16.9658	18.3354	21.2765	18.1186	20.8645	20.7695	23.874	YDR243C
chrIV	950536	952595		19.2681	19.6495	20.066	17.2916	21.1522	21.6224	22.0717	YDR244W
chrIV	952714	954131		54.0543	39.9375	49.7712	67.4701	73.3878	70.4355	75.6414	YDR245W
chrIV	954251	955097		38.4261	51.7426	36.1286	35.3086	44.6101	37.5576	47.3819	YDR246W
chrIV	955709	957788		20.4444	42.0672	18.2554	23.7599	34.2975	27.9688	38.4296	YDR247W
chrIV	957654	958436		18.8828	23.8127	27.654	18.7653	24.5774	22.6197	32.6908	YDR248C
chrIV	958563	959858		20.1721	22.119	29.6873	29.7694	39.2471	31.6658	36.8179	YDR249C
chrIV	960303	963307		28.6999	28.2573	26.9283	20.9577	24.227	21.5447	25.3927	YDR251W
chrIV	963402	964451		25.3861	51.9945	22.1649	17.699	18.7972	19.6338	18.5458	YDR252W
chrIV	965024	967001		18.9211	21.1341	12.4153	17.121	21.2203	19.3232	26.5411	YDR254W
chrIV	966328	967865		22.6307	21.4884	13.9229	17.1357	20.9053	21.159	23.7782	YDR255C
chrIV	969672	971476		30.3153	26.8699	28.451	26.7802	39.7575	29.4884	39.2216	YDR257C
chrIV	971698	974275	4_HSF1	30.9085	86.3626	14.7823	16.1004	55.7512	16.3951	50.5925	YDR258C
chrIV	974486	975986		15.7303	48.3996	27.6903	25.7614	70.5674	25.4301	57.8988	YDR259C
chrIV	976373	977287		43.1035	58.9852	60.2548	39.3865	52.18	46.3094	56.4213	YDR260C
chrIV	977398	979308		31.9653	47.1333	46.8789	35.2619	42.8872	37.3793	46.1622	YDR261C
chrIV	995765	998427		32.8328	27.474	31.2069	27.4893	26.9043	28.8029	21.4479	YDR264C
chrIV	998641	1000056		24.1362	26.1215	20.2147	19.953	22.8912	21.3162	21.4945	YDR265W
chrIV	999980	1002237		32.2652	28.8994	43.2941	33.0256	36.0847	34.9185	31.3802	YDR266C
chrIV	1002315	1003571		30.2191	30.8167	33.4102	34.4212	35.7819	33.4212	35.4551	YDR267C
chrIV	1003929	1005246		37.2577	53.7583	37.3165	37.4202	43.7828	42.8095	40.8511	YDR268W
chrIV	1005571	1008750		27.2751	54.435	30.8606	23.0959	32.5247	25.0696	26.01	YDR270W
chrIV	1008924	1009887		27.7498	28.7899	29.121	25.9766	31.046	33.1335	30.8542	YDR272W
chrIV	1012120	1013363		56.7502	56.2974	45.4389	65.6841	95.1943	78.0995	75.0916	YDR275W
chrIV	1013252	1013716		136.993	138.784	108.16	176.828	199.718	190.031	158.361	YDR276C
chrIV	1014207	1015858		31.8159	23.9512	9.54986	18.5038	17.8044	19.7663	25.8494	YDR277C
chrIV	1019288	1020502		26.154	25.737	19.1721	37.208	35.5757	35.3757	34.0266	YDR279W
chrIV	1020604	1021772		53.0828	40.0189	48.1542	86.7688	91.6671	88.768	89.5043	YDR280W
chrIV	1021802	1022426		13.5072	21.5708	17.9436	35.2542	26.6706	28.0181	23.7324	YDR281C
chrIV	1023168	1024760		9.92323	12.8253	12.5138	10.4953	11.3876	11.5125	9.89768	YDR282C
chrIV	1024910	1030275		17.3477	18.8777	22.7606	19.5081	22.9515	21.2322	25.0185	YDR283C
chrIV	1030461	1031706		31.4625	42.9086	41.6363	30.134	36.3132	30.5255	36.6314	YDR284C
chrIV	1035951	1036959		15.4726	21.4355	17.1075	11.6058	12.5346	14.2652	14.7798	YDR287W
chrIV	1037139	1038270		22.9352	25.6176	21.4516	22.6382	29.0151	22.915	29.2603	YDR288W
chrIV	1038095	1039578		23.2267	26.01	29.2402	32.0131	38.4033	35.6687	42.8244	YDR289C
chrIV	1039727	1043176		16.4741	19.1501	18.2206	15.4298	19.3304	17.1591	21.2763	YDR291W
chrIV	1043088	1045172		28.8068	28.3163	28.394	30.0442	38.2315	33.9028	40.6512	YDR292C
chrIV	1045396	1049517		41.2424	49.4066	68.2523	25.982	35.8826	31.4538	38.0377	YDR293C
chrIV	1050406	1052304		29.8641	40.6635	49.197	22.7661	33.2822	23.9087	32.8356	YDR294C
chrIV	1052536	1054908		14.64	21.1524	20.6948	21.3837	29.5166	24.7763	31.2651	YDR295C
chrIV	1055157	1055967		52.3499	60.9939	45.247	34.5682	36.0063	34.8935	39.4875	YDR296W
chrIV	1056431	1057764		36.8907	29.9102	34.6252	37.7438	44.2681	37.4432	36.9872	YDR297W
chrIV	1057997	1058992		59.1169	46.771	27.3692	48.7179	60.8205	55.2382	61.4996	YDR298C
chrIV	1059565	1061489	1_RiBi	52.0958	31.5478	44.5684	71.098	85.4468	77.3976	106.815	YDR299W
chrIV	1061412	1062873		37.8476	34.9407	35.6697	41.609	45.7566	44.7003	51.2387	YDR300C
chrIV	1063275	1067475		20.833	24.1291	22.4078	19.1644	22.878	20.0333	26.6449	YDR301W
chrIV	1067658	1068470		22.4741	22.8581	17.9724	38.8262	45.5624	48.8189	46.223	YDR302W
chrIV	1068619	1071701		27.2015	27.4026	21.9571	31.5855	37.853	34.3904	37.4119	YDR303C
chrIV	1071808	1072611		44.1123	58.6123	44.4968	37.3445	47.9047	40.5008	45.2399	YDR304C
chrIV	1073659	1075227		18.2145	22.0279	16.7488	16.6751	19.9408	18.3025	21.6425	YDR306C
chrIV	1075804	1078005		17.1352	23.5435	13.5606	16.8229	21.6211	19.2802	22.8648	YDR307W
chrIV	1077867	1078488		33.4192	27.3356	33.7467	43.9335	46.4874	46.7457	47.56	YDR308C
chrIV	1078682	1080247		81.2714	45.7658	92.4498	81.0265	72.9844	77.3419	69.0553	YDR309C
chrIV	1080920	1084518		37.0598	38.826	31.1466	31.7008	38.6885	32.4056	40.1396	YDR310C
chrIV	1085055	1087094		26.9437	24.4135	34.8838	23.1586	25.7275	26.1537	28.8133	YDR311W
chrIV	1087530	1089078	1_RiBi	30.7544	18.0736	28.8236	40.6077	45.7913	42.4876	50.2275	YDR312W
chrIV	1089017	1090111		25.8318	37.7352	24.195	22.8659	32.0631	25.7333	36.3479	YDR313C
chrIV	1092674	1093631		20.6277	22.5461	20.9886	32.0032	38.9459	34.8531	39.1663	YDR315C
chrIV	1093734	1095250		22.6398	22.4386	30.4381	29.1496	35.6937	30.5407	37.1287	YDR316W
chrIV	1103740	1105073		23.8457	30.0847	24.948	32.2422	35.1174	34.2788	40.7574	YDR318W
chrIV	1104926	1105904		27.4024	29.4881	27.9002	38.8915	44.8639	44.3331	45.5431	YDR319C
chrIV	1106017	1108126		22.0423	23.2326	22.105	22.0786	27.5399	25.603	25.6092	YDR320C
chrIV	1108199	1108519		46.1766	38.6239	33.4131	76.7406	79.1007	79.2557	65.9434	YDR320C-A
chrIV	1108659	1109936		30.0973	23.7953	28.5467	28.377	34.3358	28.7551	37.6859	YDR321W
chrIV	1110561	1111787		29.7995	27.9974	23.8755	26.6215	31.6295	29.9056	30.9933	YDR322W
chrIV	1111794	1112340		51.5474	37.4428	39.7663	70.1706	75.8784	78.38	76.6395	YDR322C-A
chrIV	1112279	1114053		20.8356	17.8647	18.7135	23.333	26.575	26.7703	23.8444	YDR323C
chrIV	1114250	1116763	1_RiBi	39.14	17.7	41.9839	51.6414	54.9781	52.8376	60.4069	YDR324C
chrIV	1117115	1120309		18.2689	13.9739	18.3406	21.6762	25.2618	23.3609	23.5628	YDR325W
chrIV	1120512	1125124		24.1989	22.9254	36.3958	25.7087	28.8034	25.8221	31.2639	YDR326C
chrIV	1125239	1126094		41.2015	44.865	44.178	26.9897	32.8482	29.489	30.7037	YDR328C
chrIV	1126034	1127622		21.6719	28.8423	21.6608	19.8132	24.4277	17.9988	25.3024	YDR329C
chrIV	1127792	1129454		19.6901	39.1997	19.3378	13.4166	20.2279	13.3562	21.457	YDR330W
chrIV	1129468	1130898		33.0568	29.8323	31.6148	34.85	37.1506	37.713	34.2221	YDR331W
chrIV	1130974	1133170		15.4031	19.0867	20.1607	17.3695	21.0785	18.9863	22.5052	YDR332W
chrIV	1133042	1135466		27.2325	30.4995	24.9584	29.7776	37.0598	31.8039	40.8418	YDR333C
chrIV	1135766	1140570		34.6825	41.6828	26.2267	30.0515	49.0018	29.5777	43.0995	YDR334W
chrIV	1140795	1144933		30.2538	32.0876	22.9472	28.8066	39.0918	31.555	37.0055	YDR335W
chrIV	1145067	1146145		36.903	24.0451	36.2082	37.658	45.6893	43.3277	37.7292	YDR336W
chrIV	1146254	1147230		33.7682	24.3117	26.8767	32.1094	34.8117	32.7636	31.2827	YDR337W
chrIV	1147242	1149523		18.8966	24.5105	22.1378	14.8426	19.0782	15.6552	19.9008	YDR338C
chrIV	1149843	1150558		55.1644	34.4358	55.2345	84.9028	84.8742	92.6668	79.576	YDR339C
chrIV	1151636	1153716	1_RiBi	46.0559	24.2406	48.6141	50.8441	55.6989	54.8166	56.4395	YDR341C
chrIV	1154071	1156017		48.3135	38.7685	9.2663	26.0165	33.1375	28.1867	51.6732	YDR342C
chrIV	1159563	1161402		48.2021	39.4571	9.09543	24.5655	31.1049	27.1166	49.2655	YDR343C
chrIV	1162810	1164690		123.137	74.8939	22.8017	113.709	96.344	123.417	134.938	YDR345C
chrIV	1166935	1168880		45.7308	44.4	40.1435	54.1211	63.2462	56.0543	66.2605	YDR346C
chrIV	1169059	1170260		36.7654	39.9424	34.8508	30.7143	36.9307	29.6975	39.267	YDR347W
chrIV	1170126	1171963		38.1542	27.4445	26.1585	40.6365	41.5424	40.6616	41.2837	YDR348C
chrIV	1172262	1174283		32.3194	36.9972	31.6986	34.123	41.4998	35.0267	44.6333	YDR349C
chrIV	1176048	1178200		20.7953	24.8887	36.046	24.9421	31.1404	26.4718	34.8146	YDR350C
chrIV	1178443	1181404		29.5893	29.0956	53.0825	32.4667	41.9239	38.9633	47.3077	YDR351W
chrIV	1181621	1182987		40.7274	39.6468	32.578	38.0867	38.7624	37.4983	41.8871	YDR352W
chrIV	1183205	1184325		89.6758	64.7216	73.2493	64.1382	58.1074	60.0762	49.8415	YDR353W
chrIV	1184619	1185948		31.0016	23.8466	25.0564	26.9774	28.8321	28.7001	29.3386	YDR354W
chrIV	1185993	1189181		23.9056	24.4143	12.751	22.6605	27.1348	23.8753	26.6265	YDR356W
chrIV	1189100	1189736		28.5588	26.0814	21.2535	36.7005	35.9965	34.7634	36.4524	YDR357C
chrIV	1190005	1191894		16.5218	25.8088	16.1032	12.3758	15.6959	13.0779	17.3172	YDR358W
chrIV	1191859	1195197		31.704	27.5734	41.0791	26.1586	26.0434	27.395	31.5906	YDR359C
chrIV	1195158	1196308		43.5982	39.6679	38.0602	66.5273	82.529	70.9278	80.055	YDR361C
chrIV	1196625	1198805		18.0383	22.3259	17.9569	17.7754	21.3827	18.2809	21.1719	YDR362C
chrIV	1199001	1201510		15.1518	14.5514	24.924	19.6143	23.8896	22.1369	23.8022	YDR363W
chrIV	1202087	1202545		55.1492	84.4418	28.3005	56.9915	95.0491	57.7198	90.4502	YDR363W-A
chrIV	1202493	1204231		31.0713	39.1431	26.3851	37.8118	48.3724	37.4512	53.792	YDR364C
chrIV	1204402	1206467		38.5184	19.2195	41.9311	52.3735	60.4953	57.4477	65.4689	YDR365C
chrIV	1212790	1213650		26.8128	25.133	28.3968	45.133	50.6725	49.284	52.2423	YDR367W
chrIV	1213817	1215005		23.1455	27.1561	23.5207	16.2903	21.6578	17.644	25.0539	YDR368W
chrIV	1214946	1217601		11.9366	16.0086	16.056	12.9156	13.4026	13.3035	15.8311	YDR369C
chrIV	1217725	1219122		27.8736	24.6248	28.3154	38.3772	41.9618	38.0654	44.7507	YDR370C
chrIV	1219333	1221046		14.9258	19.0189	17.9469	14.9292	16.9534	17.5026	20.7871	YDR371W
chrIV	1220967	1222463		35.8213	37.3251	43.2526	59.42	62.0348	61.4156	68.4389	YDR372C
chrIV	1222644	1223411		27.9141	29.8405	30.6317	32.0023	43.9503	35.3936	41.8957	YDR373W
chrIV	1224728	1225254		19.7994	22.0181	20.6344	14.9455	16.7449	18.0265	16.808	YDR374W-A
chrIV	1225105	1226555		22.0908	25.6724	19.4566	16.699	19.0466	17.0672	20.233	YDR375C
chrIV	1226757	1228339		19.7349	23.7145	18.7045	14.7775	17.8785	17.0097	19.4617	YDR376W
chrIV	1228514	1229320		67.6485	51.6377	40.3034	87.603	90.3918	85.621	83.5827	YDR377W
chrIV	1229138	1229625		44.5419	44.2383	43.5416	47.1546	46.8766	44.7597	48.7747	YDR378C
chrIV	1230100	1233201		20.157	28.7398	25.7679	17.507	20.9048	18.3032	21.3302	YDR379W
chrIV	1233110	1233751		17.9177	54.9664	27.2282	24.6107	40.6237	25.7088	41.5502	YDR379C-A
chrIV	1234097	1236250		33.303	102.244	71.5982	39.1272	71.9277	43.233	71.5261	YDR380W
chrIV	1236459	1238196		224.311	177.626	218.274	280.724	274.936	293.385	292.291	YDR381W
chrIV	1238182	1239120		32.6863	42.5717	43.1885	39.3109	41.2435	45.2933	50.9975	YDR381C-A
chrIV	1239409	1239970	2_RPG	255.624	75.2579	350.08	306.355	158.401	292.342	173.319	YDR382W
chrIV	1239879	1240701		65.3218	43.7594	70.072	93.5231	69.0346	102.666	67.7157	YDR383C
chrIV	1241041	1242174		38.6951	20.9973	36.779	52.6235	35.233	45.1939	28.9417	YDR384C
chrIV	1243121	1245910	1_RiBi	223.213	82.5953	283.545	155.342	87.9363	144.713	87.3279	YDR385W
chrIV	1246071	1248125		14.0326	14.4821	12.494	18.0796	18.0901	21.7976	19.933	YDR386W
chrIV	1248046	1249965		18.8806	28.1195	19.8199	16.6936	18.233	16.0445	22.1692	YDR387C
chrIV	1250133	1251756		36.2449	45.3658	32.6987	22.5934	23.692	22.9432	27.9966	YDR388W
chrIV	1252013	1254816		35.3022	38.5573	29.8877	35.6609	43.4072	34.9145	45.2961	YDR389W
chrIV	1254783	1256874		22.08	20.6452	18.391	24.3014	28.4874	24.0633	30.6262	YDR390C
chrIV	1257237	1258480	3_MSN2	19.1423	28.653	21.9798	17.0468	19.3327	19.1531	23.3307	YDR391C
chrIV	1259830	1261449		39.9102	49.916	30.4319	45.5588	58.2559	44.3406	59.3526	YDR393W
chrIV	1261575	1263054		57.5642	96.5673	28.475	46.348	76.4809	43.791	80.1192	YDR394W
chrIV	1263188	1266247		44.2688	40.6097	46.2748	56.7283	55.2018	53.3077	57.8117	YDR395W
chrIV	1266265	1266986		43.1379	33.9326	36.4861	44.2896	51.7678	41.7589	44.3616	YDR397C
chrIV	1267394	1269521	1_RiBi	52.9372	24.6763	45.7096	60.1015	59.232	62.5235	64.0233	YDR398W
chrIV	1269976	1270846	1_RiBi	110.628	34.249	89.3502	241.988	209.409	231.428	175.605	YDR399W
chrIV	1270985	1272235		22.8252	17.3878	19.0232	18.3412	20.9379	20.4542	21.7046	YDR400W
chrIV	1272198	1273744		5.62975	16.2697	9.71056	6.1592	11.2766	7.14968	16.079	YDR402C
chrIV	1274558	1276243		6.27353	18.0909	14.2089	6.30625	8.89573	7.48331	12.218	YDR403W
chrIV	1276509	1277374		44.3434	51.719	41.9703	58.9161	67.8174	60.1786	73.5151	YDR404C
chrIV	1277570	1278573		58.5774	78.9097	63.3776	39.0959	45.6708	40.876	45.2282	YDR405W
chrIV	1279078	1283925		19.2809	41.3759	18.6302	8.58797	10.9685	9.53154	13.0153	YDR406W
chrIV	1283997	1288042		20.4213	22.1591	16.7625	18.7956	20.8248	19.3372	23.1149	YDR407C
chrIV	1288042	1288942		59.5678	59.8441	62.4987	33.9636	41.2242	36.5184	39.2034	YDR408C
chrIV	1289365	1292361		22.7119	31.0158	25.7048	19.58	23.5132	19.7936	25.4743	YDR409W
chrIV	1292346	1293159		41.4787	35.0834	47.9193	46.4108	51.349	52.0819	53.4261	YDR410C
chrIV	1293303	1294442		25.6193	31.6404	21.6979	18.8452	23.0593	20.4001	25.3263	YDR411C
chrIV	1294624	1295542		38.2161	24.1274	32.4054	45.898	52.8807	53.4924	53.8001	YDR412W
chrIV	1295416	1296912		20.6237	21.8127	17.4734	24.6418	28.7061	24.2789	27.7987	YDR414C
chrIV	1296956	1298214		28.6271	24.8406	31.6656	29.5979	27.7517	29.2552	29.1527	YDR415C
chrIV	1298367	1301044		38.2259	19.6128	51.5144	37.6895	19.8749	32.7538	20.9358	YDR416W
chrIV	1301580	1302214	2_RPG	357.922	49.3675	469.406	344.443	48.9051	295.722	41.5155	YDR418W
chrIV	1303123	1305434		13.0956	13.9353	17.7768	15.2756	12.9092	14.8343	14.2177	YDR419W
chrIV	1305984	1311813		33.4359	28.9384	52.0309	27.8954	29.0497	31.8456	32.5723	YDR420W
chrIV	1311962	1315147		13.7305	25.8419	20.7563	12.6272	14.2255	11.8989	17.3024	YDR421W
chrIV	1315033	1317827		25.5007	31.7635	29.3973	24.7669	31.078	26.8691	30.6233	YDR422C
chrIV	1317975	1319275		40.3932	41.8375	34.6753	26.096	27.0917	29.2835	29.7399	YDR423C
chrIV	1319357	1319896		62.6209	66.5786	47.9742	76.3782	72.8175	71.4348	73.2664	YDR424C
chrIV	1320012	1322025		18.2155	25.758	16.8507	16.1728	23.1751	17.5326	23.7605	YDR425W
chrIV	1322160	1323484		53.5514	92.4346	38.6703	72.8646	138.643	71.1765	152.679	YDR427W
chrIV	1323446	1324270		32.7739	91.1723	40.9493	28.5317	37.5058	30.3846	56.7002	YDR428C
chrIV	1324372	1325341	1_RiBi	95.7269	83.0421	102.651	100.254	109.895	102.705	109.322	YDR429C
chrIV	1325276	1328550		26.4742	34.7301	29.1178	27.6546	35.2058	27.453	39.7354	YDR430C
chrIV	1328738	1330453	1_RiBi	151.536	165.085	154.752	132.297	161.232	136.025	186.299	YDR432W
chrIV	1331139	1332957		18.6974	17.3765	21.6497	20.8485	21.7515	23.5042	22.7793	YDR434W
chrIV	1332818	1333995		15.4251	19.852	9.43727	11.7151	12.3904	14.8677	15.7563	YDR435C
chrIV	1334566	1337068	3_MSN2	18.1661	24.3214	19.5097	12.8133	15.271	14.1464	16.1793	YDR436W
chrIV	1339573	1340829		18.7485	22.9224	20.7659	22.8307	25.1903	23.5383	26.9469	YDR439W
chrIV	1342389	1344347		19.2779	18.0412	14.0151	22.6566	23.671	24.2718	26.5627	YDR440W
chrIV	1344386	1345209		41.1308	42.8431	40.9802	51.0349	47.188	47.7819	54.0068	YDR441C
chrIV	1345128	1349966		14.8138	16.236	14.3398	14.1662	14.8034	13.8841	15.8208	YDR443C
chrIV	1350196	1352393		20.7989	16.1233	14.6182	20.6847	22.8402	22.1882	24.9237	YDR444W
chrIV	1354709	1355586	2_RPG	245.578	28.2422	352.775	283.833	58.827	248.244	52.5485	YDR447C
chrIV	1356038	1357435		40.506	37.4322	47.9649	28.5613	26.8388	27.3849	31.9964	YDR448W
chrIV	1357388	1358955	1_RiBi	39.5191	22.7527	40.9849	67.1213	70.0162	66.6121	77.7429	YDR449C
chrIV	1359856	1360916	2_RPG	258.77	55.2779	380.906	286.145	68.1393	239.414	65.5556	YDR450W
chrIV	1360905	1362241		53.3101	50.2547	61.0738	41.5629	44.2133	39.7772	41.2136	YDR451C
chrIV	1362726	1364940		39.6986	38.3231	42.6556	50.3238	48.2443	48.1268	49.4499	YDR452W
chrIV	1364986	1365742		21.009	30.9134	26.2567	32.4204	33.7164	29.6222	31.4032	YDR453C
chrIV	1366158	1366862		45.6738	36.203	50.4118	41.549	40.3844	44.6654	42.5513	YDR454C
chrIV	1367417	1369455		20.7937	19.789	18.5238	17.9499	19.8824	18.3192	23.8756	YDR456W
chrIV	1369674	1379673		25.3207	21.2423	28.8301	24.4013	28.3793	25.3539	29.953	YDR457W
chrIV	1379878	1382093		26.0524	19.4421	34.3859	30.9905	31.9216	34.7829	37.1694	YDR458C
chrIV	1382213	1383537		25.823	23.6127	27.3385	23.37	25.1357	23.7975	24.1915	YDR459C
chrIV	1383669	1384916	1_RiBi	48.364	42.9224	65.6952	30.8441	25.9988	33.4363	27.4304	YDR460W
chrIV	1385151	1385432		82.2803	38.6322	168.861	94.5005	43.3101	94.7014	26.4082	YDR461W
chrIV	1385353	1385822		23.8747	26.0904	40.8809	14.8793	12.7333	13.5168	9.82226	YDR461C-A
chrIV	1386009	1386639		52.6265	54.0432	50.2685	44.1469	45.7954	43.6313	46.1425	YDR462W
chrIV	1386759	1388585		42.4197	33.3936	56.5789	42.2932	38.1168	39.9045	39.919	YDR463W
chrIV	1388752	1393245		22.7152	18.6445	21.5458	19.674	21.5163	19.9633	22.0499	YDR464W
chrIV	1393154	1394640		27.0509	15.8203	23.9522	42.055	46.2112	39.6569	55.1412	YDR465C
chrIV	1395005	1397857		25.6145	32.1432	27.8982	25.2378	33.6832	27.3305	41.1623	YDR466W
chrIV	1397927	1398858		40.7796	40.5667	42.596	48.5891	44.6374	49.8123	43.2726	YDR468C
chrIV	1398973	1399822		30.9419	21.7416	31.3104	40.2033	34.3778	42.8788	30.0488	YDR469W
chrIV	1399574	1401303		20.347	22.2781	27.2581	18.4994	19.0757	18.8366	21.8211	YDR470C
chrIV	1401609	1402682	2_RPG	270.666	50.0158	364.723	301.142	69.3548	271.667	67.197	YDR471W
chrIV	1403195	1404312		67.7272	76.1974	60.6534	90.4108	102.484	84.0166	121.319	YDR472W
chrIV	1404269	1405920		19.6125	22.1691	20.7239	22.368	24.025	22.7572	29.1757	YDR473C
chrIV	1407350	1410190		22.4065	27.934	25.8546	16.2323	17.9482	16.8138	18.9737	YDR475C
chrIV	1410252	1411190	3_MSN2	49.659	78.5626	46.7189	27.5823	28.9813	29.1691	30.4547	YDR476C
chrIV	1412077	1414393		32.7664	35.7518	28.5899	31.1022	35.4173	32.0255	37.2126	YDR477W
chrIV	1414536	1415237		29.1559	23.5025	27.6709	42.354	44.4801	40.8787	45.9899	YDR478W
chrIV	1415125	1416934		26.1965	30.3084	26.7751	25.9546	30.7469	26.4706	36.5313	YDR479C
chrIV	1417332	1418695		21.0618	21.7889	20.0286	20.7054	23.9291	17.0014	20.6216	YDR480W
chrIV	1418439	1420303		24.1225	38.7341	37.1722	18.2675	20.717	14.9129	21.2827	YDR481C
chrIV	1420325	1420945		32.4707	37.9215	35.5781	27.2964	23.774	28.7621	29.033	YDR482C
chrIV	1421106	1422598		43.0293	34.3358	42.0101	34.6081	34.5022	32.0891	31.7823	YDR483W
chrIV	1422732	1424783		15.3047	20.7482	25.3935	20.2878	21.5926	18.686	25.3477	YDR484W
chrIV	1424665	1427248		23.6559	34.765	27.8738	26.3171	29.575	26.4282	31.7132	YDR485C
chrIV	1427313	1428165		34.8905	45.6301	34.0065	38.1321	54.0688	38.2869	60.2877	YDR486C
chrIV	1428249	1429057		46.6461	40.2532	51.7421	40.8373	45.6038	40.7834	41.5991	YDR487C
chrIV	1429098	1430790		16.2659	18.8653	12.3616	9.73037	11.9288	10.1611	12.68	YDR488C
chrIV	1430992	1432183		29.5959	24.321	25.2049	26.37	28.9518	28.8295	29.2463	YDR489W
chrIV	1431803	1434351		18.4094	21.2428	15.9756	11.8757	14.6313	11.6099	17.1901	YDR490C
chrIV	1434768	1435966		46.7991	21.7586	47.1124	73.5199	93.5226	61.2832	85.0151	YDR492W
chrIV	1436098	1436690		34.8216	32.9833	37.475	28.4517	30.3884	30.826	29.3845	YDR493W
chrIV	1436864	1438088		31.0039	39.3867	35.1947	38.9391	40.2729	39.2633	46.9232	YDR494W
chrIV	1437919	1441210		14.1921	18.0396	17.3976	22.1538	23.5821	23.371	24.9481	YDR495C
chrIV	1441356	1443439	1_RiBi	58.0278	24.9208	56.7384	80.4345	84.5491	84.9855	96.4813	YDR496C
chrIV	1443607	1445566		71.9999	41.1309	43.952	87.6418	76.0158	67.1306	66.8303	YDR497C
chrIV	1445768	1447035		30.9502	31.4915	24.933	22.7324	26.1254	22.7659	24.9627	YDR498C
chrIV	1447800	1450188		24.8651	21.39	21.6768	28.2653	24.4996	26.826	26.3624	YDR499W
chrIV	1450105	1450871	2_RPG	237.713	47.3696	335.273	309.106	112.128	288.417	103.428	YDR500C
chrIV	1451326	1453059		16.058	42.6236	16.0186	20.7304	19.6462	21.9698	22.0965	YDR501W
chrIV	1453014	1454519		73.3878	112.679	27.6936	88.8784	68.1048	64.4866	60.4402	YDR502C
chrIV	1454828	1455947		27.0588	38.7987	12.2908	23.614	21.1734	20.4998	22.1647	YDR503C
chrIV	1456587	1459499		27.9183	36.7291	24.1424	22.3047	27.0985	22.7587	26.1878	YDR505C
chrIV	1459245	1461570		21.5215	31.771	18.0229	19.7415	21.9945	21.8268	23.752	YDR506C
chrIV	1462176	1465906		44.6497	25.7803	26.104	51.0101	46.7005	50.4173	44.3504	YDR507C
chrIV	1466225	1468486		110.372	75.8554	87.5417	144.997	143.22	154.922	173.058	YDR508C
chrIV	1469313	1469837		84.8911	102.732	58.7398	119.227	127.638	106.642	121.921	YDR510W
chrIV	1469970	1470505		39.1089	47.324	51.7999	30.3272	34.7214	29.5775	31.6627	YDR511W
chrIV	1470414	1471063		34.0284	49.0404	39.7108	29.0396	38.4038	33.8432	35.2082	YDR512C
chrIV	1470993	1471549		40.0164	66.7476	64.1526	37.3856	43.9943	35.9787	54.3783	YDR513W
chrIV	1471497	1473058		26.5745	31.642	29.3009	32.4341	36.4788	32.3822	36.7798	YDR514C
chrIV	1473200	1474805		19.7069	39.685	12.1027	28.518	46.8709	26.4528	48.8694	YDR515W
chrIV	1474854	1476586		28.788	49.8567	18.1381	10.6224	12.3788	10.1624	13.6399	YDR516C
chrIV	1477123	1478463		38.3133	42.7526	17.8937	19.4914	19.5989	19.6203	22.4996	YDR517W
chrIV	1478557	1480211		16.1126	24.2542	21.3825	12.1199	15.3205	12.9283	17.4461	YDR518W
chrIV	1480354	1481013		39.5312	36.7593	30.9123	39.4897	44.7198	46.3048	43.5554	YDR519W
chrIV	1480963	1483487		20.7165	25.8737	20.265	27.993	38.201	29.5001	41.4562	YDR520C
chrIV	1487269	1489055		34.2653	84.0548	31.8839	44.8092	51.6457	44.8481	54.316	YDR524C
chrIV	1489242	1489592		238.024	188.661	222.079	554.68	529.237	582.509	593.751	YDR524W-C
chrIV	1489440	1489841		682.734	486.339	675.83	656.208	566.425	667.588	622.944	YDR524C-B
chrIV	1490508	1490898		85.0221	68.6107	75.1214	44.241	43.4034	44.2727	40.4595	YDR525W-A
chrIV	1491027	1492438		47.3925	46.905	39.9215	62.6069	81.0328	61.4369	86.0384	YDR527W
chrIV	1494266	1495962		50.8576	38.7026	35.422	59.5668	66.508	63.1878	75.2271	YDR528W
chrIV	1495971	1496603		89.1258	74.6223	66.2268	118.192	126.288	122.106	129.586	YDR529C
chrIV	1496671	1497914		39.6552	45.7265	30.8909	37.2004	38.8351	36.9116	37.0134	YDR530C
chrIV	1498177	1499417		25.4166	42.27	21.7278	22.8463	33.2814	23.2407	35.0285	YDR531W
chrIV	1499353	1500603		21.1389	24.274	19.1263	26.7759	32.2386	31.0646	35.0294	YDR532C
chrIV	1501358	1502222	3_MSN2	22.2623	43.3426	44.7874	20.7817	28.6304	27.9197	38.1487	YDR533C
chrIV	1507788	1509798		9.81463	14.2372	8.40057	10.4372	11.7242	11.4209	16.2708	YDR536W
chrIV	1519524	1520932		15.3765	21.3391	15.3343	12.9908	15.3358	13.8684	17.192	YDR541C
chrIV	1523229	1523700		0.216645	1.39032	0.481295	0.596454	0.617686	0.718301	1.13359	YDR542W
chrIV	1525837	1531770		0.228068	0.259794	0.127441	0.191227	0.156304	0.186653	0.172503	YDR545W
chrIX	448	6620		1.60266	1.29425	0.830739	0.804378	0.631103	0.852165	0.64774	YIL177C
chrIX	8759	9173		0.479662	1.51428	0.308986	0.989807	1.82983	1.76676	1.81234	YIL176C
chrIX	11491	16427		14.2797	15.0034	21.082	13.0587	12.5254	12.5902	12.4336	YIL173W
chrIX	16699	18660		5.00092	13.9584	4.75001	4.51922	5.54441	4.43961	6.37688	YIL172C
chrIX	22895	26159		208.157	53.6705	228.306	93.9922	47.0678	100.267	28.1052	YIL169C
chrIX	33616	35009		20.639	28.3091	18.3262	14.4719	17.6581	14.9023	17.5117	YIL164C
chrIX	37345	39126		16.0711	13.1074	14.091	12.8811	12.6917	13.2584	13.5406	YIL162W
chrIX	39422	40174		30.9508	25.0839	33.0786	46.9513	40.0072	49.8232	42.0653	YIL161W
chrIX	40207	41478		12.4757	16.1652	18.5628	7.37659	9.46238	7.77819	11.872	YIL160C
chrIX	41809	46071		23.0687	19.9228	11.5776	26.9322	26.8607	27.8805	26.7178	YIL159W
chrIX	46189	46910		59.8021	47.7548	23.5273	44.7479	49.6877	44.7359	42.4127	YIL158W
chrIX	46740	47575		32.7479	36.1806	23.2646	29.1801	28.8926	26.3962	27.3526	YIL157C
chrIX	47666	48055		34.5631	44.7998	22.4059	25.8028	32.9334	30.4061	27.7998	YIL156W-B
chrIX	51499	53778		20.5788	41.3108	14.9174	12.2296	17.2197	12.1262	17.8251	YIL155C
chrIX	53910	55072		51.0952	69.2578	43.3791	20.1944	20.099	19.201	24.8279	YIL154C
chrIX	55164	56425		33.0167	42.852	28.4688	19.1974	16.3118	15.0393	19.0339	YIL153W
chrIX	56528	57382		27.4609	33.4219	26.4039	24.7914	26.6104	27.4238	28.4163	YIL152W
chrIX	60896	62761		23.0962	20.7577	24.9334	27.6868	26.7547	26.2008	27.3037	YIL150C
chrIX	62930	68208		29.6484	23.2931	34.892	30.8009	33.3252	31.4359	31.127	YIL149C
chrIX	68681	69594	2_RPG	299.791	38.1555	401.794	365.766	50.1121	317.106	44.9569	YIL148W
chrIX	69500	73668		30.7758	21.2346	33.4369	34.4449	21.799	32.6841	18.2331	YIL147C
chrIX	74077	75945		13.7513	21.9202	17.6152	11.9754	20.9232	12.5966	22.0166	YIL146C
chrIX	75930	77355		41.1168	39.4119	34.8057	36.289	38.9398	37.6898	38.805	YIL145C
chrIX	77993	80377		31.367	28.1164	30.4975	35.9101	43.9428	40.7552	40.0805	YIL144W
chrIX	80287	83077		26.9865	34.2981	26.7757	27.5441	36.1939	28.0974	37.1863	YIL143C
chrIX	83264	84939		86.4241	99.6578	65.1014	68.0522	89.727	67.9964	85.8043	YIL142W
chrIX	85215	87885		33.4839	52.6129	28.1362	27.2298	28.4002	29.8096	28.8898	YIL140W
chrIX	87878	88736		23.5841	29.732	28.9921	34.3802	33.6118	36.7772	33.1737	YIL139C
chrIX	88878	89744		50.517	36.3691	54.9703	61.5659	62.6478	65.8319	57.181	YIL138C
chrIX	89878	92836		23.4669	21.057	27.4224	21.2797	22.8155	21.6702	22.589	YIL137C
chrIX	93574	94885		29.8289	34.3219	32.2869	15.4403	13.519	14.36	14.0304	YIL136W
chrIX	94921	96432		37.3854	47.8285	36.876	27.0788	28.1006	26.6881	29.2704	YIL135C
chrIX	97334	98505		64.6375	68.2516	76.1325	61.9998	37.5989	56.3854	39.2633	YIL134W
chrIX	98426	99433	2_RPG	274.396	31.6776	327.274	309.463	41.0335	269.685	35.2143	YIL133C
chrIX	99703	100561		31.8048	16.5141	42.6899	38.6451	15.2742	30.34	14.2039	YIL132C
chrIX	100718	102328		24.2511	14.9705	15.1032	21.2483	16.8353	18.5424	16.1437	YIL131C
chrIX	102630	105760		39.8093	21.3425	42.6768	40.7633	42.9124	39.4204	36.5832	YIL130W
chrIX	106022	113344		18.1181	26.5891	19.0712	17.117	20.9139	17.8533	20.212	YIL129C
chrIX	113721	116950		27.4777	29.3921	28.0968	36.8243	57.1392	37.8927	57.289	YIL128W
chrIX	116990	117683		43.972	28.0609	34.7215	118.706	127.332	123.596	110.953	YIL127C
chrIX	117909	122207		43.2361	35.3087	31.3627	36.9429	41.102	38.6258	33.8526	YIL126W
chrIX	122394	125819		33.271	35.2489	24.1296	19.805	22.7637	20.2745	22.6646	YIL125W
chrIX	126145	127199		47.5596	52.6026	42.3267	25.1002	23.8432	22.3249	24.3035	YIL124W
chrIX	127661	129919		84.2486	64.199	113.582	63.5537	59.8625	71.8986	59.7315	YIL123W
chrIX	130307	131818		19.8575	26.6544	39.0132	15.2665	22.131	17.1399	24.3179	YIL122W
chrIX	132218	133999		14.0937	35.8851	21.6783	10.0233	14.4925	8.12178	11.9779	YIL121W
chrIX	134298	136199		38.9642	44.3232	25.6565	50.9426	54.273	54.9598	52.6824	YIL120W
chrIX	136408	137903		32.5093	27.1729	31.3237	38.1715	48.8669	42.4055	44.6964	YIL119C
chrIX	139601	140489		53.4284	64.242	47.1686	73.1151	86.3812	70.5369	82.0078	YIL118W
chrIX	140536	141634		26.1326	70.9487	161.7	39.4262	61.3115	52.9924	63.3883	YIL117C
chrIX	142842	144180		26.7206	37.0869	39.5543	29.2448	37.9667	32.3103	34.6147	YIL116W
chrIX	144264	148888		27.9266	22.5985	34.6496	25.4819	24.8465	26.0495	25.3437	YIL115C
chrIX	149130	150020		26.056	50.3262	32.6285	17.69	21.7247	18.1158	20.2801	YIL114C
chrIX	150526	151293		16.617	41.1674	25.9737	9.46143	12.8524	9.1763	12.9024	YIL113W
chrIX	151550	154935		30.1418	34.0864	38.0503	22.2845	26.7665	22.2305	28.7597	YIL112W
chrIX	155151	155799		48.4923	56.9533	74.7241	44.2362	44.1333	44.94	48.3708	YIL111W
chrIX	156013	157291		29.7874	37.9554	27.8007	35.3366	40.0056	36.4563	32.1267	YIL110W
chrIX	157270	160272		54.3594	51.0589	47.8511	33.026	37.539	33.9011	33.7705	YIL109C
chrIX	160672	163050		30.6871	42.915	42.3237	25.4468	28.2378	26.623	25.4651	YIL108W
chrIX	162885	165942		13.7846	24.4728	26.8886	14.1027	17.2978	15.6646	18.0878	YIL107C
chrIX	166398	167527		48.3103	47.9424	41.9703	49.3121	54.8427	55.9752	53.2897	YIL106W
chrIX	167412	169781		29.6936	37.9989	21.4911	26.9253	30.0868	29.318	33.8742	YIL105C
chrIX	169906	171558	1_RiBi	26.1805	20.7755	26.6587	35.8612	39.1101	37.6288	39.064	YIL104C
chrIX	171661	173102		31.356	30.2012	27.7432	50.368	54.685	49.7867	60.4018	YIL103W
chrIX	175288	177451		12.9929	41.767	14.8781	6.31932	7.71897	6.60724	8.29183	YIL101C
chrIX	177978	179663		6.09223	9.15572	8.83636	3.97088	4.42912	3.76717	4.74872	YIL099W
chrIX	179681	180281		25.769	37.9667	25.6002	32.4497	31.6345	28.4645	34.0597	YIL098C
chrIX	180400	182069		11.3138	19.0247	11.4249	11.8462	14.1205	12.532	15.8274	YIL097W
chrIX	181975	183192		16.3468	13.9503	14.9111	33.577	37.6944	33.4261	40.2481	YIL096C
chrIX	183767	186444		19.6266	29.7824	18.1097	17.7158	21.2492	19.3678	22.0139	YIL095W
chrIX	186308	187673		56.4221	43.9171	58.228	41.2604	45.386	44.0409	41.9867	YIL094C
chrIX	187890	188946		66.5827	79.4575	53.4686	45.9892	46.9115	43.7895	38.6634	YIL093C
chrIX	189011	191083		19.5925	21.8782	21.036	22.7817	28.0728	23.3345	29.4922	YIL092W
chrIX	190991	193243	1_RiBi	42.293	24.0667	42.9325	51.3595	58.1682	53.6102	55.217	YIL091C
chrIX	193456	195429		31.75	27.8465	33.6336	39.9491	42.6574	41.4375	38.9923	YIL090W
chrIX	197839	199483		19.1651	27.653	17.3411	17.5393	19.2503	16.6036	19.1516	YIL088C
chrIX	199567	200192		28.4293	32.5941	26.8368	21.1309	20.8307	18.7588	21.7027	YIL087C
chrIX	200437	202115		35.5271	30.7763	34.9004	33.9901	38.3263	36.4578	31.6203	YIL085C
chrIX	202242	203300		53.9414	48.7601	49.903	58.4921	57.0313	59.8909	54.0923	YIL084C
chrIX	203458	204757		27.961	37.9837	30.9855	30.78	42.2439	29.4875	35.1481	YIL083C
chrIX	210822	212135		38.1166	26.4945	31.3112	55.1584	54.6725	50.795	56.2151	YIL079C
chrIX	212433	214778		88.0515	59.3161	69.4166	80.1192	86.8597	79.9107	78.8873	YIL078W
chrIX	216616	217803		50.632	77.5362	51.2457	58.1298	71.3021	61.3082	69.5668	YIL076W
chrIX	217765	220761		70.1167	126.595	35.8987	68.1843	109.357	66.1147	116.629	YIL075C
chrIX	221027	222623		41.2137	84.95	27.7289	31.7074	36.2172	32.3384	35.9172	YIL074C
chrIX	228431	230026		17.0887	18.2728	26.6989	21.5615	20.7995	22.8733	21.7854	YIL071C
chrIX	230147	231149		47.0283	31.5807	39.3997	31.4584	27.4437	32.2568	26.6158	YIL070C
chrIX	231372	232413	2_RPG	290.893	37.8942	363	367.756	64.5764	320.677	56.1922	YIL069C
chrIX	233023	235532		22.8096	17.4097	30.861	23.5384	20.3315	23.697	21.4452	YIL068C
chrIX	235640	237818		15.885	15.6198	13.3034	14.6872	12.4448	14.5573	14.1844	YIL067C
chrIX	238015	240755		4.84004	24.1494	12.8101	4.22407	6.05451	4.54641	9.31211	YIL066C
chrIX	241232	241865	3_MSN2	23.0944	42.0657	20.1817	17.2898	21.2441	16.7655	22.3836	YIL065C
chrIX	241942	242796		29.745	33.5741	28.3315	28.1548	25.7007	24.8328	28.467	YIL064W
chrIX	242724	243791		45.4155	44.0665	41.7383	37.8634	37.9711	39.2815	40.5252	YIL063C
chrIX	243916	244499		73.1225	77.4031	42.7545	64.2375	62.3116	64.5952	67.0889	YIL062C
chrIX	244446	245577		28.5117	29.7239	20.9087	31.6307	32.8035	28.1584	33.514	YIL061C
chrIX	246276	246540		3.79273	4.25951	3.33269	3.72239	2.85227	2.60568	5.01269	YIL060W
chrIX	247900	248468		3.21194	7.24919	6.11548	5.45877	4.87859	7.19181	5.72202	YIL057C
chrIX	249652	251971		48.6708	102.961	50.8193	69.0247	69.8254	71.7916	73.3698	YIL056W
chrIX	255081	256027		296.971	150.612	323.735	293.306	262.722	279.919	238.138	YIL053W
chrIX	256176	257093	2_RPG	290.495	47.3895	380.775	368.528	72.9919	325.323	64.9647	YIL052C
chrIX	257725	258368		129.189	104.578	257.905	115.7	81.2715	99.0145	83.5849	YIL051C
chrIX	258792	259789		41.0121	36.0988	42.4845	42.3178	37.661	36.48	34.6571	YIL050W
chrIX	260151	260989		32.0329	26.9166	48.4601	43.9112	39.0565	42.274	35.5594	YIL049W
chrIX	261131	265018		30.1441	37.1859	31.8265	31.1796	34.7489	31.3374	33.9058	YIL048W
chrIX	265030	267860		60.9145	47.3299	65.8253	55.6763	44.6614	50.1503	36.0471	YIL047C
chrIX	268650	270682		35.9673	40.95	32.6715	23.4268	25.34	23.9307	23.175	YIL046W
chrIX	270879	272781		13.1783	19.4688	16.8456	12.9043	15.01	13.1692	14.1075	YIL045W
chrIX	272834	273871		29.6854	36.0516	36.2154	32.9269	32.4715	27.8487	32.3883	YIL044C
chrIX	273968	274969		44.1255	48.8832	51.0473	33.8733	38.5901	37.0435	37.8563	YIL043C
chrIX	275057	276342		33.4678	43.3516	25.8024	19.9748	22.1221	19.6908	21.3522	YIL042C
chrIX	276483	277592		49.6498	63.8917	46.7814	28.7837	35.5912	29.408	31.4265	YIL041W
chrIX	277687	278245		47.3281	39.6759	68.1589	57.7045	60.3197	63.6948	56.4237	YIL040W
chrIX	278373	279994		23.1698	26.4927	33.5632	22.7941	22.3098	22.2282	21.5566	YIL039W
chrIX	279979	282894		38.8706	32.6854	38.5768	48.0327	51.7826	49.0059	53.5438	YIL038C
chrIX	285482	287538		36.2546	57.8352	29.3226	33.2716	39.3725	32.3055	46.3796	YIL036W
chrIX	287437	289060		45.8822	42.5381	42.9859	61.3792	59.1813	58.3157	64.4404	YIL035C
chrIX	289152	290141		54.3851	50.5106	42.9935	55.8256	57.7366	55.7962	55.1768	YIL034C
chrIX	290239	291776		43.8111	49.8333	29.3527	29.1675	32.1249	26.5333	33.9801	YIL033C
chrIX	292462	296135		24.6604	31.1014	33.7735	28.4916	31.9731	30.8484	35.3397	YIL031W
chrIX	295964	300057		38.6105	55.7594	32.4584	40.7486	57.2038	37.2809	57.0982	YIL030C
chrIX	300450	301361		11.766	17.0935	19.737	22.0413	23.3735	22.9801	26.8459	YIL029C
chrIX	303592	304182		46.8536	34.4486	40.6043	90.9555	90.1271	87.491	81.8568	YIL027C
chrIX	304335	307937		25.1028	17.3118	14.663	25.9785	25.5842	26.9994	23.9813	YIL026C
chrIX	308581	310462		26.7591	40.3543	43.3045	18.7426	22.3432	16.6837	23.6191	YIL023C
chrIX	311046	312685		64.9331	60.6017	58.6725	53.5824	61.8842	52.3487	54.5112	YIL022W
chrIX	312792	313994		55.6873	43.6699	51.4419	69.4895	68.2801	65.8115	62.1505	YIL021W
chrIX	313915	314908		28.4922	32.5403	49.8649	44.9526	37.5556	41.0571	39.1515	YIL020C
chrIX	315057	316244		28.0988	24.5158	49.0912	49.0313	40.7167	46.9963	42.5358	YIL019W
chrIX	316725	318021	2_RPG	405.749	41.1964	596.111	352.057	48.6921	304.984	37.8129	YIL018W
chrIX	317938	321041		27.8536	26.1828	31.0978	25.7521	17.6121	25.0476	20.0073	YIL017C
chrIX	321386	321992		137.388	94.8759	180.644	129.26	102.933	116.156	81.6944	YIL016W
chrIX	322267	324105		89.469	54.9889	186.249	56.1642	39.7086	54.5434	22.5853	YIL015W
chrIX	325114	325613		5.33016	6.7878	5.05914	7.52337	6.1278	6.33677	7.10495	YIL014C-A
chrIX	325928	327998		25.0541	27.4784	21.1338	31.3786	34.1427	31.2398	31.1962	YIL014W
chrIX	328099	332555		13.8157	22.8317	14.5526	13.4272	18.2651	13.8314	19.09	YIL013C
chrIX	333694	334609		8.52704	22.2101	12.1814	3.36983	7.63953	4.55999	6.91191	YIL011W
chrIX	334831	335709		21.9457	34.7548	13.4333	14.7303	20.419	18.6932	20.8922	YIL010W
chrIX	335516	336269		28.0267	33.7872	22.1364	23.2986	25.1037	26.9137	22.674	YIL009C-A
chrIX	339329	341632		69.8517	35.1459	59.0525	62.0324	63.7832	57.2719	55.1966	YIL009W
chrIX	342443	342961		24.9361	34.9948	30.2577	48.4308	50.6562	54.6948	45.5929	YIL008W
chrIX	342832	343681		26.6312	43.4211	49.6809	22.11	26.1835	24.2904	25.7965	YIL007C
chrIX	344045	345352		26.0572	36.0786	19.2726	17.7752	22.0316	15.206	21.0493	YIL006W
chrIX	345558	347986		22.1539	26.7967	17.6879	28.5098	31.0145	28.0839	31.763	YIL005W
chrIX	347883	348533		36.2162	42.8028	26.901	36.5977	40.1549	36.2121	38.8033	YIL004C
chrIX	349069	350090		24.1524	38.1739	18.0242	21.6967	29.1608	21.0477	27.7091	YIL003W
chrIX	350272	350582		43.9467	52.2377	36.0437	47.2411	56.7653	51.6541	46.3602	YIL002W-A
chrIX	350438	353596		20.9001	26.8758	17.1255	21.8982	24.0989	21.923	24.0825	YIL002C
chrIX	353880	355576		24.9297	31.487	20.7998	23.7572	24.0198	24.8944	24.0719	YIL001W
chrIX	355989	356979		28.219	38.2023	25.0926	28.6504	32.0035	28.9305	30.4542	YIR001C
chrIX	357327	360486		22.6205	26.4471	17.917	23.9269	29.6385	26.4297	30.0975	YIR002C
chrIX	360836	362996		31.5072	39.9098	25.6967	23.4801	27.7467	22.086	26.3932	YIR003W
chrIX	363167	364629		39.7	43.6751	37.4319	41.8778	48.7634	42.1858	44.9717	YIR004W
chrIX	364887	365402		23.149	29.1759	20.4142	26.2083	27.6299	30.7269	28.1086	YIR005W
chrIX	365402	369968		45.0774	51.328	32.1818	32.7167	37.2348	31.5597	36.8917	YIR006C
chrIX	370608	373110		12.6871	23.2892	15.2668	10.8149	12.5531	10.0533	13.5651	YIR007W
chrIX	373006	374364		25.472	29.7192	29.2278	26.3459	29.711	26.3288	31.3622	YIR008C
chrIX	374446	375305		31.6306	42.4661	30.6733	41.7622	54.6822	43.6234	52.7465	YIR009W
chrIX	375336	377289		35.5251	48.0165	28.8682	32.944	36.3865	34.6705	37.7418	YIR010W
chrIX	377211	378279		46.0193	57.5272	42.041	44.8209	59.0951	45.2644	58.9291	YIR011C
chrIX	378445	379906	1_RiBi	60.0844	63.9058	53.0936	71.5809	84.4137	68.7696	91.8808	YIR012W
chrIX	379929	380462		8.40966	15.0365	11.4871	13.0256	12.1583	13.09	14.506	YIR013C
chrIX	381061	381833		55.6263	66.0283	48.9788	87.5036	89.2722	91.0726	99.4444	YIR014W
chrIX	382586	383475		43.8347	62.4293	41.2012	19.6841	18.8282	15.9086	18.7931	YIR016W
chrIX	383397	384119		38.7975	142.12	18.026	10.7524	14.0284	13.2102	13.926	YIR017C
chrIX	384608	385822		40.0357	82.0965	36.0296	29.0156	33.8307	28.2303	35.4813	YIR018W
chrIX	389475	393745		9.99604	14.7026	10.3789	5.44199	6.37443	5.70531	6.34051	YIR019C
chrIX	397241	398419		32.6436	27.3008	22.7494	28.1966	27.0247	26.3504	29.269	YIR021W
chrIX	398513	399338		34.6442	31.0885	28.1471	45.7608	46.2146	48.7419	44.7523	YIR021W-A
chrIX	398674	399338		37.9985	32.6727	31.4942	48.4082	47.9665	50.7353	47.4739	YIR022W
chrIX	399747	402799		28.6049	32.8634	23.7058	27.0992	27.0695	28.067	29.8428	YIR023W
chrIX	402763	403534		24.4679	33.8244	19.7575	26.8731	37.2509	31.072	35.8243	YIR024C
chrIX	403641	404796		21.9017	36.6354	18.3117	20.3492	25.6789	20.074	27.3158	YIR025W
chrIX	404779	406006		28.6864	33.4121	23.1532	39.014	46.1878	40.1855	54.2509	YIR026C
chrIX	411983	412809		11.572	20.5093	9.47259	12.5444	13.4386	15.986	12.8393	YIR030C
chrIX	412960	414802		41.7534	45.1552	31.374	30.8628	31.7642	27.0998	28.3096	YIR031C
chrIX	414905	415678		59.7488	83.219	44.2715	39.3047	40.26	32.7109	37.2076	YIR032C
chrIX	416070	419567		41.4786	26.6854	21.7004	42.2687	48.2171	41.8412	50.7039	YIR033W
chrIX	419542	420785		26.453	40.6313	31.4919	19.7989	30.3721	22.1901	33.4733	YIR034C
chrIX	420961	421858		30.5478	42.4436	35.2794	20.3341	21.9155	21.701	23.5055	YIR035C
chrIX	422005	422921		20.9841	37.771	15.8866	10.9895	15.8876	11.5437	18.2508	YIR036C
chrIX	423024	423768		23.4029	44.1553	15.0951	13.9307	22.0991	14.8182	21.2282	YIR037W
chrIX	423690	424542		17.5275	34.5186	11.9471	8.7367	11.5611	8.96864	11.583	YIR038C
chrIX	430321	432256		7.44008	18.3845	25.7125	4.8935	6.82569	5.42064	7.94375	YIR039C
chrIX	433720	434324		1.5175	4.72318	2.81983	1.59861	1.20089	1.19308	2.98697	YIR041W
chrIX	434895	436051		16.5818	22.0571	25.4297	14.161	16.429	8.54744	9.03995	YIR042C
chrV	13585	14644		28.0036	43.3751	23.7086	32.8641	31.856	29.312	28.0561	YEL072W
chrV	16287	17963		82.0531	86.6838	559.015	51.4412	51.2778	54.3923	58.0914	YEL071W
chrV	19588	21233		1.12987	4.84145	6.49426	1.24609	1.41376	1.0145	1.30742	YEL070W
chrV	21428	23231		6.86736	9.84423	6.00681	5.84684	6.98464	6.68338	8.82789	YEL069C
chrV	25993	26970		22.6848	28.8729	16.3136	23.4636	24.729	22.7897	24.2611	YEL067C
chrV	27614	29619		30.2549	33.734	20.7381	42.1226	30.6917	55.1575	39.3636	YEL065W
chrV	29692	31283		18.4582	25.6145	14.9751	16.2411	17.9801	17.9448	20.1082	YEL064C
chrV	31424	33721		54.8253	45.2107	44.2622	54.8255	55.9604	52.9542	52.752	YEL063C
chrV	36273	39632		28.6474	26.666	21.1131	27.5165	29.833	26.8274	29.8822	YEL061C
chrV	39810	42015		47.7799	106.052	45.4721	26.6507	40.2548	31.6063	43.8329	YEL060C
chrV	42343	42748		20.4328	44.2789	42.5763	12.9404	13.489	14.7763	15.4065	YEL059C-A
chrV	43207	45001		43.127	59.4672	65.1437	26.7056	25.9074	27.5301	24.6398	YEL058W
chrV	47089	48404		39.8614	45.853	31.5814	34.4412	35.4239	31.5829	32.0107	YEL056W
chrV	48397	51633		40.0072	32.9584	37.6578	47.753	50.0861	45.1313	47.0691	YEL055C
chrV	52480	53343	2_RPG	329.483	50.9033	394.521	355.615	67.8433	316.343	60.5229	YEL054C
chrV	53816	56169		21.2033	19.095	23.669	23.1205	17.5903	21.7719	18.7224	YEL053C
chrV	56535	58171		21.1927	31.4071	23.6979	16.1511	15.979	16.8869	18.8648	YEL052W
chrV	58306	59257		68.4481	61.8451	61.7595	76.7478	72.3023	73.069	71.2404	YEL051W
chrV	59514	60945		48.289	53.23	39.5922	38.5953	38.4374	30.4862	34.5746	YEL050C
chrV	63712	64112		5.81227	7.5202	6.05165	4.8083	8.46195	4.41592	14.5351	YEL049W
chrV	64192	65193		25.2228	19.7889	23.555	43.2256	44.8408	39.6711	45.1572	YEL048C
chrV	65308	66818		27.1946	32.8503	50.5558	23.0754	25.1309	20.9558	22.9715	YEL047C
chrV	67046	68909		307.339	215.79	98.3403	236.014	209.964	226.008	190.223	YEL046C
chrV	69727	70309		72.2207	111.109	46.1655	49.4873	53.5268	46.7	50.3807	YEL044W
chrV	70432	73462		34.9475	46.392	31.5426	28.8147	30.2015	27.942	31.7632	YEL043W
chrV	73557	75475		44.5565	28.1487	30.5187	50.1464	48.7802	46.4459	43.6907	YEL042W
chrV	78013	79500		199.391	180.741	378.434	213.907	203.504	217.536	218.442	YEL040W
chrV	79529	80065		32.5272	86.4405	84.8731	30.2103	36.5299	32.415	46.976	YEL039C
chrV	80410	81200	3_MSN2	21.7203	55.0915	21.7546	19.4102	28.8497	17.5475	31.152	YEL038W
chrV	81243	82805		63.0389	119.609	33.6884	63.2563	99.8322	55.953	90.9634	YEL037C
chrV	82966	84696		63.0755	70.6212	64.7492	46.0388	53.6783	48.937	55.3683	YEL036C
chrV	85582	86368		854.813	1033.51	735.384	613.5	570.196	612.072	628.155	YEL034W
chrV	86885	89999		46.6816	45.2873	41.0374	34.0446	30.4118	32.1221	28.6974	YEL032W
chrV	90221	93991		54.8144	75.3566	28.7895	44.7648	57.616	43.5847	56.1096	YEL031W
chrV	94221	96742		16.7043	25.9148	13.3203	22.5309	22.6275	23.7686	22.6591	YEL030W
chrV	96750	97860		24.1837	34.264	27.5372	27.7249	30.7376	29.5874	30.3833	YEL029C
chrV	100698	101528		150.582	115.973	138.67	148.62	149.776	140.781	134.733	YEL027W
chrV	101752	102395	1_RiBi	215.959	88.6248	191.259	349.826	314.87	325.547	276.243	YEL026W
chrV	102375	106186		30.8697	46.7387	26.1555	26.916	29.4549	26.8668	26.7559	YEL025C
chrV	107145	108314		99.5536	90.7644	78.4747	75.2454	77.0734	76.7642	74.1401	YEL024W
chrV	108439	110552		12.0275	21.3039	18.0635	12.6707	16.1098	13.1801	16.2464	YEL023C
chrV	111353	115877		27.074	27.8124	19.0242	30.2524	28.3611	28.1903	26.0399	YEL022W
chrV	116107	117031		59.7507	60.0044	65.9447	444.062	237.504	385.628	172.523	YEL021W
chrV	117134	117591		151.744	134.82	133.891	137.746	97.8256	126.385	67.7292	YEL020W-A
chrV	118514	120366		13.0754	22.8098	18.3593	7.73428	8.26544	7.49106	8.43999	YEL020C
chrV	120346	121310		14.8551	23.0672	17.3172	17.1315	19.476	18.3249	19.0342	YEL019C
chrV	121436	122378		53.4795	77.4765	49.6263	47.6464	47.6897	44.5624	44.2087	YEL018W
chrV	122380	123038		207.721	173.913	163.555	328.661	291.589	321.421	233.691	YEL017C-A
chrV	123615	124765		30.7917	43.6713	22.5964	17.8326	21.6884	19.2057	20.9638	YEL017W
chrV	124521	126424		24.0974	25.2796	19.9622	17.5403	18.783	17.0299	18.8043	YEL016C
chrV	126589	128340		50.6603	43.665	38.923	48.1512	49.9105	48.3824	47.4981	YEL015W
chrV	128550	130745		32.027	36.3397	32.8679	32.6643	28.9271	28.645	31.8037	YEL013W
chrV	131620	132641		13.1574	28.1228	8.37038	10.8769	15.2431	12.8481	15.6403	YEL012W
chrV	133088	135348		31.2307	45.3747	17.4645	17.9174	20.2232	19.5943	21.0351	YEL011W
chrV	138821	139851		397.179	200.519	387.743	321.623	210.918	287.49	197.98	YEL009C
chrV	141630	143924		90.6342	64.2067	60.2314	110.667	83.6386	101.58	74.9276	YEL007W
chrV	144252	145927		38.475	43.1335	29.1466	38.5116	38.1606	34.7345	36.885	YEL006W
chrV	145823	146794		19.8803	28.6775	21.1092	21.4961	24.1312	20.3387	24.1737	YEL005C
chrV	146893	148067		25.3168	33.1723	20.7555	42.1946	45.463	40.0172	43.3209	YEL004W
chrV	148156	148724		38.1747	47.8447	26.0373	76.346	98.1958	78.8679	99.733	YEL003W
chrV	148698	150089		41.7431	71.1663	27.8294	37.7873	45.4543	35.8264	53.8131	YEL002C
chrV	150205	151016		39.3301	57.8762	25.2745	34.6203	45.1125	36.647	47.3801	YEL001C
chrV	153403	155913		65.2531	70.7537	21.5497	80.916	81.0486	79.1508	67.0012	YER001W
chrV	156738	157588	1_RiBi	69.8701	43.3165	54.4501	104.725	111.72	102.564	101.784	YER002W
chrV	157655	159161		44.29	35.8375	15.4701	35.2343	40.535	36.4812	36.2056	YER003C
chrV	159569	160516		57.3623	77.6359	23.5962	41.2567	55.6007	42.6551	53.3687	YER004W
chrV	162683	164348	1_RiBi	65.397	51.9915	59.1741	75.781	81.3016	74.2477	81.818	YER006W
chrV	164505	166215		18.2039	24.6061	17.3059	20.3976	22.4075	19.8153	23.8049	YER007W
chrV	166047	166934		53.9043	53.5236	47.9909	76.0549	76.8319	77.5342	78.6424	YER007C-A
chrV	167739	171887		35.5163	35.3461	28.2578	32.7731	35.7818	33.0124	38.498	YER008C
chrV	172026	172667		71.8662	59.8004	59.9042	84.4367	94.1503	77.6845	87.028	YER009W
chrV	172531	173366		23.7191	33.4532	24.4958	23.1818	31.9766	22.9947	31.7549	YER010C
chrV	175193	176168		7.10222	16.693	15.6859	6.22226	7.65896	6.96615	10.0585	YER011W
chrV	177748	178571		91.4113	160.915	24.337	107.284	178.626	99.6743	181.827	YER012W
chrV	178788	182346		21.334	42.6322	17.1744	24.8364	29.1454	23.5031	28.833	YER013W
chrV	182545	184332		10.6328	24.8869	12.7993	7.20656	8.78069	8.57159	10.9464	YER014W
chrV	184465	187028		15.832	21.5308	16.3688	13.13	12.3114	11.3136	14.0646	YER015W
chrV	188187	189431		35.6013	34.7219	27.7734	28.715	31.9157	30.6983	31.6827	YER016W
chrV	189430	191909		29.685	45.589	24.1908	24.1753	32.0983	22.6365	33.7671	YER017C
chrV	191890	192711		65.0134	65.2589	33.3126	37.9795	37.9257	38.9349	32.0162	YER018C
chrV	192796	194313		58.8922	69.4659	36.4897	38.5244	37.6528	33.9638	36.027	YER019W
chrV	194228	194627		110.174	93.0887	83.7325	126.652	129.232	117.362	105.763	YER019C-A
chrV	195074	196693		36.78	51.1991	39.4885	20.1335	24.0028	17.1986	23.9252	YER020W
chrV	196878	198650		69.4748	99.5652	29.0526	77.4894	118.914	66.3	122.466	YER021W
chrV	198775	200976		23.1951	23.7715	23.1264	22.9806	24.9589	23.6526	26.8658	YER022W
chrV	201022	202006		49.3061	56.4147	44.3362	32.2406	35.0906	30.4201	38.4879	YER023W
chrV	202177	205080		26.9728	34.5219	33.1717	27.0615	27.2973	28.3362	29.2546	YER024W
chrV	205185	207096	1_RiBi	93.6948	63.7606	85.8459	96.4315	104.529	94.7674	97.4389	YER025W
chrV	207517	208564		44.0598	46.7136	34.9233	62.5481	65.9328	53.898	59.7517	YER026C
chrV	208747	210354		27.9132	41.5275	17.5503	22.0588	24.6788	20.4784	23.8001	YER027C
chrV	210646	211987		23.4448	24.8811	31.2112	42.3668	45.6473	40.4408	44.6363	YER028C
chrV	212474	213247		42.4451	43.8645	37.0085	39.6673	46.5375	44.4393	49.2899	YER029C
chrV	213348	214024		43.4389	56.6481	28.2023	76.013	95.8358	78.6112	86.1634	YER030W
chrV	213930	214788		49.2392	64.3342	35.5658	40.035	48.1849	40.5918	45.7482	YER031C
chrV	214969	217957		27.5158	29.3996	14.5584	28.9722	34.5073	29.9717	38.8086	YER032W
chrV	217885	221511		14.4063	25.8941	20.2032	11.3076	18.3015	12.2611	19.8229	YER033C
chrV	222565	223206		82.7792	189.8	65.3193	51.8451	98.3838	49.9038	90.7155	YER035W
chrV	223259	225237		110.811	91.9281	100.652	130.383	142.178	122.538	137.827	YER036C
chrV	225777	227075		20.7851	37.6948	43.8019	12.6913	23.3468	13.4336	24.9717	YER037W
chrV	229707	232243		26.886	36.2485	26.4456	20.9541	23.6055	20.6087	28.8248	YER040W
chrV	232378	234904		18.8951	38.7609	13.612	18.0517	21.0688	16.4847	21.3209	YER041W
chrV	234844	235655		38.2027	103.213	16.7572	42.2158	52.1741	38.4602	61.143	YER042W
chrV	235550	237202		171.388	134.832	133.761	156.48	153.665	148.555	143.137	YER043C
chrV	237448	238155		68.9745	91.6728	117.601	62.3482	83.8865	54.6359	71.8906	YER044C
chrV	239854	241576		14.3549	27.6257	39.4603	15.0917	22.2837	16.1027	25.1729	YER045C
chrV	243776	246690		23.4946	32.8291	23.0457	22.6817	24.6287	22.2197	27.9669	YER047C
chrV	246859	248258		32.1573	45.6725	31.0281	25.5901	30.4135	21.502	34.4647	YER048C
chrV	250621	251334		52.4558	65.0202	64.1624	75.1879	81.5863	74.3036	85.7059	YER048W-A
chrV	251709	253742		46.7136	56.6655	75.1109	59.3619	65.7747	59.997	69.5471	YER049W
chrV	253862	254453		40.1451	42.8055	36.9664	50.3627	67.9352	57.8453	56.2948	YER050C
chrV	254639	256290		16.4474	23.0068	23.7254	15.0361	19.2546	16.7829	20.8112	YER051W
chrV	256262	258121		51.6958	68.5274	46.6318	45.8162	51.7111	44.3411	44.0299	YER052C
chrV	258592	259736		35.9159	71.7532	47.7886	19.2835	21.3656	18.9689	28.1311	YER053C
chrV	260715	261103		162.494	286.981	527.26	131.68	199.157	180.2	232.513	YER053C-A
chrV	261955	264140		25.7703	36.3721	27.0661	24.6266	30.4825	25.8654	31.9128	YER054C
chrV	264758	265917		64.4818	39.5123	69.104	55.2652	39.9672	52.6126	31.3732	YER055C
chrV	266397	268203	1_RiBi	119.406	43.0092	104.637	128.666	126.568	115.806	97.6881	YER056C
chrV	269342	270216	2_RPG	259.329	34.7332	344.878	301.503	44.0093	266.881	38.2831	YER056C-A
chrV	270646	271205		63.9128	27.4818	128.26	45.7088	12.4027	30.1675	11.9982	YER057C
chrV	271705	272237		27.9048	30.9302	32.3725	26.142	22.3582	26.5458	23.5005	YER058W
chrV	272441	273977		27.7251	29.1172	21.0185	22.3364	20.2517	20.5172	21.4783	YER059W
chrV	274421	276310	1_RiBi	29.2441	31.1745	46.6558	22.1017	20.2815	20.8771	20.5341	YER060W
chrV	278244	279665		14.84	19.5254	22.8059	10.8116	15.1246	10.175	13.8928	YER061C
chrV	279755	280747		28.4043	40.1744	30.2688	12.671	18.8137	13.3655	20.3057	YER062C
chrV	281616	282514		66.4194	108.38	40.5777	46.7086	66.0751	46.1271	86.058	YER063W
chrV	282446	284362		114.636	121.138	35.3704	121.373	135.815	119.876	133.203	YER064C
chrV	285123	287181		50.6898	72.2984	25.2292	39.9285	49.6048	34.1259	44.6077	YER065C
chrV	291837	292643		44.3967	61.221	10.2099	12.2758	26.7545	12.274	30.5672	YER067W
chrV	292929	294929		45.616	45.4664	36.1835	47.3243	50.0569	46.0164	50.9638	YER068W
chrV	295336	298121		29.5205	30.3465	28.7336	25.8467	23.2786	26.1229	23.7551	YER069W
chrV	298871	301821		141.695	56.3355	36.3191	126.692	131.659	120.683	133.6	YER070W
chrV	301722	302378		52.0723	41.8589	46.431	108.031	94.0166	105.416	87.7587	YER071C
chrV	302697	303339		128.083	108.946	108.925	181.096	138.915	174.207	126.169	YER072W
chrV	303579	305867		122.034	51.8601	57.9024	133.152	108.874	101.871	82.9225	YER073W
chrV	306296	307294	2_RPG	305.834	44.8235	445.759	364.326	67.3465	325.761	57.602	YER074W
chrV	307583	308214		39.0363	31.0149	40.6046	62.4751	59.5087	66.2046	58.9337	YER074W-A
chrV	308348	311365		30.4747	29.3902	21.7967	33.6223	36.7786	31.2928	44.0196	YER075C
chrV	312297	313637		13.5429	16.576	13.161	10.3793	11.7175	8.38993	12.2985	YER076C
chrV	314548	316600		22.9262	26.604	31.5037	25.1362	25.967	25.4351	28.012	YER077C
chrV	316701	318575		22.4199	34.2322	29.0291	28.0386	28.5826	27.2824	31.9094	YER078C
chrV	318840	319851		15.3273	27.0995	22.0247	16.4891	18.6438	17.5407	16.3759	YER079W
chrV	319917	321928		27.9721	43.6563	27.696	29.2858	33.7443	27.1755	34.3633	YER080W
chrV	324179	325998	1_RiBi	38.2237	35.7486	50.2027	49.8964	51.7631	48.2349	62.934	YER082C
chrV	326129	327075		40.7521	37.9277	35.3457	43.793	42.6869	42.423	43.6895	YER083C
chrV	328367	330348		42.3774	36.6579	49.9805	33.2653	32.9424	30.7166	34.0545	YER086W
chrV	330529	332376		19.6547	26.3649	18.8205	15.3597	17.6586	15.8181	17.3672	YER087W
chrV	332372	332876		68.8731	49.6957	35.8299	83.401	78.8524	83.9191	72.7364	YER087C-B
chrV	333040	335355		55.5733	49.4807	61.051	46.7127	37.753	48.2356	38.4886	YER088C
chrV	335871	337691		49.1679	55.7741	52.5508	33.5639	33.2148	32.1831	37.0552	YER089C
chrV	337855	339560		35.293	40.0423	43.3491	34.0739	33.0507	32.3729	36.162	YER090W
chrV	339637	342236		192.122	316.215	72.8446	71.6659	54.4505	37.4743	41.1542	YER091C
chrV	342815	343431		58.2406	92.7251	41.7264	53.3111	61.4254	56.4315	58.8488	YER092W
chrV	343260	347667		17.0752	36.8737	17.7573	18.3712	21.8822	18.3378	26.2721	YER093C
chrV	347787	348441		32.0522	49.5597	25.572	23.6054	22.3904	19.6956	27.1195	YER093C-A
chrV	348573	349455		70.1284	136.643	28.7661	53.631	90.4778	55.9509	93.5681	YER094C
chrV	349912	351380		58.7711	51.4698	30.4432	38.6647	45.8453	43.0918	48.3215	YER095W
chrV	351613	353452		3.64045	11.1555	6.78008	3.92799	6.68159	4.66842	9.54296	YER096W
chrV	355283	358056		10.9352	17.1464	8.73198	13.2719	16.9934	13.3294	21.916	YER098W
chrV	358030	359105		33.3428	24.5819	35.4163	34.5702	33.7206	32.2816	35.1592	YER099C
chrV	359275	360408		35.3689	40.3314	36.3667	39.7175	39.0421	38.3163	40.7317	YER100W
chrV	360285	361827		15.1353	19.98	26.6235	13.9644	12.2378	14.0739	13.2307	YER101C
chrV	362732	363767	2_RPG	353.238	53.2803	501.72	315.961	57.7857	280.768	56.7722	YER102W
chrV	364534	366646		20.3346	199.86	24.7951	12.4668	28.1548	11.9747	23.2114	YER103W
chrV	366767	367810		26.9254	40.059	20.1649	22.3732	23.7107	21.5674	25.3214	YER104W
chrV	367712	372033		25.8137	27.8036	23.5015	27.7244	31.8238	27.4198	34.3084	YER105C
chrV	373339	374720		31.4483	33.0748	35.0667	36.9092	37.7427	32.7296	38.2073	YER107C
chrV	375027	377804		20.0344	21.5529	22.0626	17.5725	18.5275	17.4903	19.4788	YER109C
chrV	378608	382243		45.9346	23.8529	52.3627	46.6971	51.6235	44.9675	57.9011	YER110C
chrV	382508	386194		24.7527	15.1439	21.1933	26.5455	28.3923	28.0702	29.24	YER111C
chrV	387130	387895		35.157	33.2107	32.6031	52.7975	61.107	55.377	56.6655	YER112W
chrV	387857	390209		29.6426	24.1472	30.7634	32.7567	34.5056	32.7942	35.2949	YER113C
chrV	390350	394016		24.1382	20.4419	26.092	23.95	24.0838	23.11	27.4437	YER114C
chrV	394177	395073		29.7791	17.1922	53.8651	41.9169	28.6711	38.9727	32.6478	YER115C
chrV	394984	396271		35.6399	25.7049	68.2288	44.071	28.6384	37.0678	28.4547	YER116C
chrV	396645	397718	2_RPG	303.111	37.8642	454.074	360.187	48.8553	313.676	42.1312	YER117W
chrV	397771	399261		34.3831	23.523	29.9614	43.8916	32.3438	40.341	36.4234	YER118C
chrV	399400	400875		30.3684	33.8663	23.6389	22.2069	23.2775	19.5342	23.1167	YER119C
chrV	401072	401973		70.6478	77.3698	57.7826	60.6679	66.4697	54.6106	63.9168	YER120W
chrV	402752	404432		60.8739	47.5053	49.2757	66.3322	73.3444	69.2255	75.8105	YER122C
chrV	404615	406720		33.9478	27.8542	41.7724	40.8619	43.936	42.2944	49.3516	YER123W
chrV	407030	409102		95.6847	60.8827	109.896	132.561	130.206	128.186	126.517	YER124C
chrV	409684	413119		43.3467	45.5063	37.3771	39.7719	44.0201	39.8587	48.4351	YER125W
chrV	413009	414275	1_RiBi	76.3523	37.891	79.1785	106.709	118.563	104.073	115.277	YER126C
chrV	414450	415642	1_RiBi	53.8702	30.7051	48.2954	73.005	81.757	71.9365	90.4361	YER127W
chrV	415767	416596		27.4162	21.8702	30.8476	26.922	28.9218	26.3007	26.9516	YER128W
chrV	416756	420949		28.2911	35.2402	30.9738	30.9155	35.2904	33.1511	38.482	YER129W
chrV	420895	422541		41.8703	55.7326	67.0411	37.0674	38.1507	40.6716	38.0844	YER130C
chrV	423590	424456	2_RPG	275.61	73.8738	400.584	330.902	119.403	294.804	112.873	YER131W
chrV	425053	430902		28.1514	25.9112	46.9473	33.5199	34.112	34.3029	37.1345	YER132C
chrV	432425	434187		78.4157	85.2555	64.1634	104.479	114.997	105.168	122.015	YER133W
chrV	437014	437857		27.6743	31.6434	21.6842	24.2059	24.9688	27.3684	26.9365	YER134C
chrV	439470	441297		34.4913	50.2484	25.7913	38.4532	48.2054	36.0805	47.3715	YER136W
chrV	441204	441838		17.4539	15.1946	16.2991	30.5016	30.9056	28.8168	31.7229	YER137C
chrV	451506	453306		23.0868	27.7542	30.6115	24.6207	26.1294	24.4663	24.4803	YER140W
chrV	453395	455117		37.9094	71.1289	92.6412	25.5973	34.7181	27.4523	41.0998	YER141W
chrV	455111	456127		14.3249	67.6388	19.6331	16.3509	48.4734	17.2016	46.2285	YER142C
chrV	456248	457715		29.9232	81.9938	17.8614	25.3357	44.6455	25.1156	54.4614	YER143W
chrV	457691	460231		23.931	46.3177	32.5383	21.5121	29.2658	24.2896	33.6297	YER144C
chrV	460423	461784		80.0247	63.9955	103.088	100.545	89.7201	107.483	75.0153	YER145C
chrV	462529	462951		53.8121	67.9372	41.9104	65.1319	64.227	67.6971	71.1218	YER146W
chrV	462888	464842		25.5401	38.5902	25.3989	18.7549	21.9782	18.2083	24.9021	YER147C
chrV	465091	466215		65.8842	53.7518	74.4649	79.5456	79.7793	82.4503	80.6423	YER148W
chrV	466081	467546		23.2247	27.4035	15.7263	22.8356	28.8702	23.8105	29.1439	YER149C
chrV	468334	468981		11.4753	23.4955	14.5606	6.73213	11.5306	11.0068	13.5044	YER150W
chrV	469619	472597		33.0221	29.0454	23.1278	29.7517	36.7935	32.5156	33.7882	YER151C
chrV	472603	474018		32.3571	24.416	23.7775	22.9615	21.9223	21.1402	18.5424	YER152C
chrV	474999	476295		57.3793	45.9879	45.985	51.1992	49.542	48.6505	45.7068	YER154W
chrV	476212	483117		43.1753	27.9255	41.6975	42.387	41.518	42.4861	39.8352	YER155C
chrV	483209	484356		84.422	71.8447	54.6973	70.2543	75.5819	70.1055	69.9239	YER156C
chrV	484764	487229		23.1492	21.8163	25.2465	24.9747	27.1155	26.0023	26.2908	YER157W
chrV	488755	490780	3_MSN2	17.9496	25.6928	18.2209	13.7462	15.8535	16.4166	18.0975	YER158C
chrV	491387	492168		61.5765	39.6431	54.2685	73.7428	112.769	86.6423	99.9978	YER159C
chrV	499074	500394		36.9874	46.7152	30.0933	37.2804	46.2573	37.4565	47.7705	YER161C
chrV	500599	502931		16.0275	23.3772	16.4532	13.4718	17.6288	14.966	18.4101	YER162C
chrV	502976	503789		28.4876	53.3761	26.8692	23.5045	33.7078	21.801	29.4068	YER163C
chrV	505079	509923		27.4855	20.4618	21.9596	30.378	30.8393	31.8333	30.0624	YER164W
chrV	510230	512258		115.933	66.2328	111.042	111.042	109.685	107.849	101.016	YER165W
chrV	512443	517544		28.0742	27.7923	24.2103	23.2585	25.3606	23.261	24.3507	YER166W
chrV	517839	520783		34.4993	20.7397	44.6244	30.3779	27.2427	29.7155	21.7982	YER167W
chrV	520966	522725		27.3074	22.0343	20.8288	28.6164	32.032	27.4338	30.0914	YER168C
chrV	523087	525963		22.9169	21.192	17.4041	22.4017	29.5944	22.4015	26.631	YER169W
chrV	525912	526996		25.558	24.3664	19.1181	27.383	33.5055	30.3368	26.2607	YER170W
chrV	526934	529537		21.4718	16.0391	23.5901	23.4351	26.0569	22.9414	22.3309	YER171W
chrV	529411	536077		21.9486	16.728	24.2994	23.2198	26.6707	23.545	21.0711	YER172C
chrV	536269	538342		18.5607	21.519	18.4432	20.0846	25.2343	20.4576	20.4945	YER173W
chrV	538319	539308		23.9229	23.0448	24.0722	25.4871	30.2425	26.9068	22.1923	YER174C
chrV	539300	540403		23.888	26.2424	27.4457	22.0011	26.9243	21.9996	27.6124	YER175C
chrV	541647	545155		59.4789	62.936	42.8142	44.1075	46.6468	48.2857	38.5999	YER176W
chrV	545555	546591		176.87	185.299	97.5451	118.348	148.856	122.376	124.427	YER177W
chrV	546756	548213		56.7523	67.0047	62.7853	32.2936	36.2715	28.1788	33.3557	YER178W
chrV	552489	553332		21.111	39.5029	20.2243	17.5107	22.263	18.9379	21.2348	YER182W
chrV	553251	554005		23.252	35.5874	22.2694	27.1166	29.1959	27.0582	24.9746	YER183C
chrV	555965	559051		12.8279	18.9398	13.8656	11.9065	14.949	12.5694	16.5947	YER184C
chrV	559317	560420		6.5275	14.8377	8.37803	10.3216	13.7438	11.2375	15.6584	YER185W
chrV	561441	562817		24.2224	20.1722	18.817	22.5447	23.3879	21.8371	22.8157	YER186C
chrV	568032	568925		7.8833	14.1201	7.31377	3.66806	4.54411	3.59344	4.1171	YER188W
chrVI	6425	7664		9.51887	12.3003	9.64977	10.7594	11.5728	10.2298	11.8942	YFL062W
chrVI	9480	10335		8.40034	17.9418	12.4324	6.58796	7.47709	7.05368	9.00075	YFL061W
chrVI	11196	12396		8.66882	18.4778	6.69422	5.43712	6.36297	6.4828	7.13438	YFL059W
chrVI	12897	14056		5.17687	10.2103	10.5624	4.89431	5.52678	5.41841	5.76291	YFL058W
chrVI	20846	22825		11.7721	12.8211	6.47672	6.87018	7.73778	6.89717	8.4983	YFL054C
chrVI	23367	25502		8.56598	15.1786	7.54925	5.35893	6.12403	5.19683	8.20107	YFL053W
chrVI	28221	29829		6.19057	12.6215	2.80274	4.22535	6.51997	5.94862	10.0663	YFL052W
chrVI	29875	30564		5.63643	14.5631	5.74583	4.60663	5.30508	4.78067	7.86386	YFL051C
chrVI	32954	36271		17.0887	20.0192	26.0682	16.339	17.7048	16.7197	19.5741	YFL050C
chrVI	36771	38765		23.4497	26.8578	24.4097	24.2608	27.5825	25.282	27.8171	YFL049W
chrVI	38725	40226		27.547	36.974	30.3139	22.8793	25.4594	27.2367	28.7389	YFL048C
chrVI	40412	42630		23.0179	27.9345	27.2124	19.7978	21.6795	21.105	22.5439	YFL047W
chrVI	42744	43588		42.2495	40.8198	33.0659	38.7505	42.1471	43.9393	46.8655	YFL046W
chrVI	43468	44466		131.699	96.472	69.1191	158.988	147.527	152.697	145.983	YFL045C
chrVI	44520	45597		69.9532	97.169	33.7939	60.3538	76.2135	59.6678	68.6461	YFL044C
chrVI	45657	47776		19.3057	34.0407	14.5692	15.281	22.1557	15.368	20.61	YFL042C
chrVI	49116	51188		20.1336	46.5838	21.0206	16.6985	18.4415	17.9038	20.7865	YFL041W
chrVI	53156	54902		223.751	204.837	150.886	257.114	268.078	258.13	260.513	YFL039C
chrVI	55259	56068		104.662	139.903	58.1518	99.4886	107.924	94.3587	107.92	YFL038C
chrVI	56259	57935		58.4845	61.8354	24.75	44.4591	47.7611	43.5489	49.6179	YFL037W
chrVI	58533	62877		31.2453	34.7715	23.5407	28.3456	29.3219	28.3246	34.8762	YFL036W
chrVI	62842	64056		45.1868	30.2703	38.9257	44.6612	45.3147	49.0316	42.1994	YFL034C-B
chrVI	64180	64973	2_RPG	296.107	42.8774	393.971	330.561	58.369	300.978	56.4633	YFL034C-A
chrVI	65285	68817		19.4507	19.8957	25.3182	17.6894	14.5933	16.9352	15.5385	YFL034W
chrVI	68792	74667		21.2103	37.9225	26.5474	18.4763	21.28	18.0573	23.975	YFL033C
chrVI	75112	76563		177.212	168.482	111.581	133.996	126.951	146.048	150.064	YFL031W
chrVI	76707	78075		15.1108	26.9246	17.5463	11.2908	11.0638	11.2293	12.6551	YFL030W
chrVI	77986	79199		16.6523	31.1795	30.7556	13.104	19.2784	14.8239	18.435	YFL029C
chrVI	79268	80255		22.4202	28.178	28.5297	23.2395	23.3185	23.9035	24.0506	YFL028C
chrVI	80351	81931		35.117	33.505	54.6082	30.738	35.8396	35.1091	32.6685	YFL027C
chrVI	82549	84047		205.592	134.718	428.915	192.31	176.266	210.128	151.05	YFL026W
chrVI	83717	87312		32.5275	40.765	48.7316	32.3639	34.8238	33.236	38.6571	YFL025C
chrVI	87702	90618		58.1849	50.2615	49.5972	61.8197	54.9407	59.2526	54.8961	YFL024C
chrVI	90965	93429		23.1468	32.8887	21.125	24.0908	33.463	25.3591	38.6377	YFL023W
chrVI	93396	95104		63.6645	56.8591	51.3238	45.8006	44.7379	44.75	40.779	YFL022C
chrVI	95965	97631		65.0237	75.7209	42.2625	43.3466	42.5236	37.4582	32.3551	YFL021W
chrVI	99190	99756		4.28383	22.4024	12.5006	3.99717	4.93442	4.16502	7.52659	YFL020C
chrVI	101543	103229		40.8631	50.2424	26.0094	30.408	34.0808	28.6004	33.08	YFL018C
chrVI	103639	104003		29.3608	32.6284	23.361	42.9224	52.5488	41.8301	44.6562	YFL017W-A
chrVI	103783	104511		33.4671	33.3894	23.29	35.5116	46.8648	32.6501	39.4292	YFL017C
chrVI	104597	106320	4_HSF1	66.1121	189.23	23.8763	54.2135	107.763	45.5137	99.1961	YFL016C
chrVI	107196	107810		11.7614	35.8318	34.0974	6.88529	9.597	7.43865	11.6771	YFL014W
chrVI	107762	109962		31.6565	36.4597	29.9447	22.6756	24.8681	22.4083	23.741	YFL013C
chrVI	112324	113985		1.28878	18.9246	2.47671	2.25381	3.06081	2.54013	3.13825	YFL011W
chrVI	114945	115771		38.4013	52.4401	37.5407	20.7479	20.6264	20.8562	26.1734	YFL010C
chrVI	115952	118571		23.8955	25.8662	18.9092	18.653	18.916	19.1014	18.8347	YFL009W
chrVI	119375	123210		32.7077	23.7428	18.9253	34.4399	35.6585	34.9845	34.2896	YFL008W
chrVI	123336	129988		24.9026	49.8076	15.8197	24.9185	39.5579	26.1962	36.7415	YFL007W
chrVI	130121	131199		50.0294	47.7758	36.811	59.8921	52.3346	54.2382	47.0592	YFL005W
chrVI	131666	134372		32.1609	29.5332	26.8894	41.2414	35.0508	36.2745	29.2329	YFL004W
chrVI	144985	146946		32.8824	33.7648	27.602	44.6667	51.5308	44.3053	51.1201	YFL002C
chrVI	147092	148493		37.3935	41.8878	32.1868	53.5792	66.2818	52.6563	57.2814	YFL001W
chrVI	149028	149819	1_RiBi	53.6395	44.5648	44.2356	123.063	143.703	133.216	137.358	YFR001W
chrVI	149985	152618		38.3142	39.6636	31.3953	36.5855	40.4726	38.3476	43.3483	YFR002W
chrVI	152519	153192		41.7177	88.0215	30.0087	46.2803	80.1963	46.5346	75.1073	YFR003C
chrVI	153343	154372		74.841	146.421	35.6934	66.9002	111.449	65.4744	109.834	YFR004W
chrVI	154317	155916		46.7271	49.0906	37.6327	53.4756	57.8914	54.6268	56.7257	YFR005C
chrVI	156104	157842		42.9023	52.4228	32.5426	42.9835	46.1929	42.4057	46.9859	YFR006W
chrVI	159278	160428		22.6192	37.4604	18.0523	18.9265	22.7578	19.8943	24.7267	YFR007W
chrVI	160491	161539		16.4931	20.8943	14.9495	14.7816	15.9894	13.3069	15.95	YFR008W
chrVI	162411	164939	1_RiBi	51.7156	46.5451	40.4335	59.9631	64.6803	58.7386	62.964	YFR009W
chrVI	164984	166658		50.4451	108.134	34.7608	45.3454	78.3369	45.8289	81.3843	YFR010W
chrVI	166527	167301		42.0677	51.7289	26.5898	42.0894	49.9537	46.9059	46.9628	YFR011C
chrVI	169861	172360		23.3819	31.8021	19.2581	24.7237	28.1274	25.6017	31.4546	YFR013W
chrVI	172343	173935		29.2107	42.2752	21.0139	22.3187	26.7373	22.796	26.5114	YFR014C
chrVI	174127	176479		22.58	32.7711	7.58742	8.17415	12.3712	8.65897	14.7182	YFR015C
chrVI	176990	180857		22.7854	23.1109	16.8647	17.8948	18.5838	17.176	18.9196	YFR016C
chrVI	182201	182938		11.081	22.9953	5.0773	2.51104	5.00041	2.71468	3.89684	YFR017C
chrVI	182988	184282		17.2719	19.4965	16.939	7.50606	8.6106	7.76705	9.67065	YFR018C
chrVI	184491	191389		19.7581	21.5254	15.8338	15.3514	17.4562	14.8984	18.5605	YFR019W
chrVI	194717	196425		25.3825	29.1583	23.614	21.8822	21.276	19.4091	24.7282	YFR021W
chrVI	196545	199142		14.6564	21.5942	14.287	12.4511	13.911	11.8664	15.348	YFR022W
chrVI	201808	203469		31.5144	73.4157	19.6221	22.2781	34.9613	21.4206	36.6019	YFR024C-A
chrVI	203654	204789		26.1283	50.4451	21.2678	24.6706	27.0119	22.2998	25.7246	YFR025C
chrVI	207376	208387		20.979	20.9945	8.82998	15.4665	17.2874	16.1443	17.6618	YFR027W
chrVI	208248	210135		39.4268	32.9444	31.418	38.9547	39.0385	36.3791	38.2454	YFR028C
chrVI	210872	213047		24.2633	36.3842	22.8518	16.492	17.1928	15.6846	20.192	YFR029W
chrVI	213257	216477		36.518	77.626	24.7876	23.5277	22.3635	22.9124	27.6749	YFR030W
chrVI	216536	220150		26.5138	31.6476	31.9244	24.357	21.3415	23.8928	22.9668	YFR031C
chrVI	220346	221441	2_RPG	338.842	42.1132	503.434	280.383	41.5574	227.672	35.5135	YFR031C-A
chrVI	223160	223973	2_RPG	420.73	57.0813	517.135	453.917	119.26	405.388	100.231	YFR032C-B
chrVI	223160	223792		464.443	60.4148	573.474	450.332	114.524	402.24	98.119	YFR032C-A
chrVI	224181	224889		178.81	190.57	161.034	145.525	145.328	151.197	138.948	YFR033C
chrVI	224790	225992		126.28	168.835	74.6506	73.1014	75.5423	63.2038	63.3212	YFR034C
chrVI	226940	227394		39.7071	36.3411	35.7311	34.3244	30.0084	30.7131	33.9732	YFR036W
chrVI	227393	229223		55.5306	53.3623	49.6573	42.5591	40.8602	40.024	44.0789	YFR037C
chrVI	229379	232032		20.6693	18.1887	19.3443	23.0766	24.2192	23.9368	27.4381	YFR038W
chrVI	231943	233685		25.0846	30.0585	19.9847	25.2245	26.9768	24.8061	26.9349	YFR039C
chrVI	233925	237351		48.4258	54.568	36.5684	55.8089	69.8602	53.9123	73.1505	YFR040W
chrVI	237272	238289		28.7751	26.618	22.0063	46.9398	47.7625	49.3041	50.7884	YFR041C
chrVI	238400	239147		24.9749	28.8858	18.2371	27.4804	29.8717	31.1047	34.0527	YFR042W
chrVI	239937	241454		45.829	51.1152	45.3718	37.0865	42.6936	38.1444	46.9079	YFR044C
chrVI	241981	243105		20.7335	32.2447	24.0919	17.0183	22.1545	17.3459	22.5614	YFR045W
chrVI	243000	244159		22.3922	28.9444	25.4128	18.9244	19.2731	20.8053	20.1361	YFR046C
chrVI	244200	245210		22.969	32.873	21.8773	19.356	19.1016	19.122	19.3197	YFR047C
chrVI	246079	248171		27.1101	27.4032	26.5254	22.4343	25.6581	23.1696	26.0097	YFR048W
chrVI	248336	249014		30.6362	44.6246	15.1774	26.6957	35.4366	32.0101	44.1701	YFR049W
chrVI	248926	249918		64.3976	123.424	21.2828	57.0714	101.04	52.1823	108.783	YFR050C
chrVI	250090	251855		58.4262	68.0254	35.2678	40.3817	42.8934	37.2746	46.1364	YFR051C
chrVI	252464	253463		61.7029	98.4594	29.2566	61.8307	115.211	61.4895	111.024	YFR052W
chrVI	253422	255167		50.3187	70.3395	7.46522	7.38352	11.4194	8.05453	19.9598	YFR053C
chrVI	264161	265614		112.286	79.3583	66.5964	84.8745	70.9545	77.6191	64.6271	YFR055W
chrVII	2777	4021		0	0	0	0	0	0	0	YGL263W
chrVII	6129	6670		0.388503	1.28331	0.423179	0.775656	0.566118	0.458909	0.685638	YGL261C
chrVII	8231	9460		3.55181	11.6789	9.99083	3.41693	4.7194	4.21932	6.68767	YGL259W
chrVII	12395	14320		23.4061	27.6813	23.203	29.2359	33.2101	30.3388	39.0411	YGL257C
chrVII	14465	16480		45.9333	40.0968	46.6814	39.3129	38.7511	37.5422	39.5147	YGL256W
chrVII	20956	22198		24.7662	33.9429	63.8762	33.5136	36.7284	27.9386	33.9869	YGL255W
chrVII	22281	23787		38.0377	59.4816	27.8863	48.8444	57.4959	53.3312	61.6883	YGL254W
chrVII	23887	25583		176.472	175.389	80.086	157.316	154.868	155.097	166.076	YGL253W
chrVII	25625	27543		34.7677	39.9859	28.3048	37.8677	38.903	36.2736	44.425	YGL252C
chrVII	31868	32831		14.9367	22.9986	12.8124	9.29846	11.4616	9.27875	19.2838	YGL250W
chrVII	35588	36818		29.3079	37.8447	61.1232	24.4535	28.9361	26.0994	30.5991	YGL248W
chrVII	36912	37557		34.9911	28.7619	25.8352	32.1416	36.1668	34.8503	39.1209	YGL247W
chrVII	37496	38819		31.2716	26.9957	25.8531	44.235	47.1348	44.449	52.1173	YGL246C
chrVII	38976	41211		55.6635	43.0116	43.481	42.3543	43.209	43.877	46.2859	YGL245W
chrVII	41422	43263		33.3933	33.5098	33.1998	25.4933	27.4991	29.3134	32.64	YGL244W
chrVII	43306	44644		15.7148	16.2927	21.5325	17.8666	16.1875	18.3427	18.7446	YGL243W
chrVII	44525	45264		24.0769	23.0771	20.1949	26.2444	25.9782	26.0223	26.9239	YGL242C
chrVII	45412	48557		17.6159	16.9812	14.8966	16.4556	19.0432	18.2605	23.4643	YGL241W
chrVII	48611	49453		29.0665	63.8697	20.7252	26.8677	40.6687	27.36	45.1762	YGL240W
chrVII	49508	52534		40.7683	47.4424	32.3103	46.9445	60.116	50.1362	71.8198	YGL238W
chrVII	52363	53611	3_MSN2	26.7018	34.925	20.7014	26.6856	32.4358	28.0265	39.6514	YGL237C
chrVII	53740	55815		19.9509	25.4398	17.4667	14.291	16.8248	14.5675	17.6011	YGL236C
chrVII	56375	59001		38.0357	27.4728	43.0281	32.6484	29.9952	31.397	34.7166	YGL234W
chrVII	59075	61920		19.0045	18.6013	17.6426	19.398	22.379	20.5843	24.1224	YGL233W
chrVII	62044	63075		30.5001	26.8204	29.8946	42.9239	46.1741	47.3735	47.7109	YGL232W
chrVII	63000	63639		39.4173	40.9058	52.1589	37.9363	42.4535	41.9256	38.4779	YGL231C
chrVII	64341	67225		9.80684	14.958	9.62011	11.0371	12.8214	11.6608	14.3415	YGL229C
chrVII	67543	69484		35.7457	45.3004	37.8044	24.7365	28.9011	26.6264	31.7899	YGL228W
chrVII	69619	72665		17.5153	23.8928	16.3978	12.3901	14.5914	13.3141	17.6202	YGL227W
chrVII	72610	73234		41.5863	44.1514	27.9651	59.0232	59.7029	62.8153	61.9533	YGL226C-A
chrVII	73339	73812		40.0707	41.4828	39.159	41.709	36.6523	37.6281	37.8752	YGL226W
chrVII	76774	78020		92.1341	58.5501	79.264	75.1575	75.435	78.594	72.9441	YGL225W
chrVII	77941	78958		30.2017	28.8377	33.1285	27.7535	29.701	31.6769	31.7603	YGL224C
chrVII	78970	80377		21.8101	19.9626	24.1719	23.4767	25.4346	24.9337	29.8429	YGL223C
chrVII	80599	81237		55.9158	58.4107	62.9386	51.9098	69.5607	62.9583	63.668	YGL222C
chrVII	81347	82310		46.0237	65.3199	47.1551	36.9977	49.0567	38.3098	54.6357	YGL221C
chrVII	82373	82917		38.301	53.0509	33.6385	35.5126	41.4162	37.5387	49.3859	YGL220W
chrVII	82792	84281		30.1511	37.4706	27.194	26.6965	33.1398	28.2945	34.642	YGL219C
chrVII	84631	87638		28.4336	23.9388	23.0147	30.0162	33.4951	29.7654	34.8547	YGL216W
chrVII	87598	89638		45.7671	33.9969	45.0525	55.2145	62.9397	54.7184	67.2891	YGL215W
chrVII	89939	91282		27.5913	32.492	27.5718	33.9603	37.8348	37.0205	44.4314	YGL213C
chrVII	93751	94568		54.9199	39.6755	42.0813	35.6547	28.6308	33.1465	36.4636	YGL210W
chrVII	95728	97123		97.8707	60.811	71.992	89.5504	85.5063	93.3406	91.8054	YGL209W
chrVII	97300	98715		23.2871	24.778	18.6608	16.6689	19.6251	14.889	16.9136	YGL208W
chrVII	98862	102207		49.5987	45.4878	32.9965	53.0151	65.0057	53.3845	65.5163	YGL207W
chrVII	102253	107610		41.9435	34.3779	37.5868	31.3371	32.644	32.1828	32.7668	YGL206C
chrVII	112387	114775		24.5921	22.0112	19.1094	20.7629	24.4157	22.8983	24.6131	YGL203C
chrVII	115886	117630		47.3543	41.1071	42.877	50.2532	51.2784	49.7164	47.6637	YGL202W
chrVII	117651	120977		24.0348	27.4912	22.5444	21.1527	24.9576	21.9602	29.9428	YGL201C
chrVII	122586	123381		66.4017	43.5922	31.9145	59.9409	47.0372	50.6784	43.5835	YGL200C
chrVII	123568	124348		63.3261	64.1603	44.1209	47.8664	48.1083	45.7241	50.7864	YGL198W
chrVII	129817	131281		33.9758	32.6309	37.2616	25.4621	25.3453	23.6351	22.4627	YGL196W
chrVII	131481	139639		39.2928	20.2557	41.931	36.0285	36.9532	37.1317	35.6929	YGL195W
chrVII	139570	140207		23.6321	17.1214	28.2946	27.7387	30.3704	33.9877	26.7765	YGL194C-A
chrVII	140263	141777		34.4238	29.0675	34.9796	33.5255	41.3951	37.8211	42.6952	YGL194C
chrVII	142068	144079		42.9811	35.9106	38.365	40.4116	41.1376	38.1682	46.4433	YGL192W
chrVII	144677	145443		63.6013	68.604	79.8449	75.9942	86.1923	78.8409	89.3918	YGL191W
chrVII	145534	147944		48.993	44.8737	54.8312	58.7571	62.5754	58.2553	61.4305	YGL190C
chrVII	148158	148966	2_RPG	323.439	68.6314	439.075	354.331	86.7135	329.615	84.6345	YGL189C
chrVII	148603	148999		343.421	52.1965	456.827	496.056	91.868	465.631	79.9847	YGL188C-A
chrVII	149401	150525		77.119	54.1287	81.9896	56.3917	54.3662	58.2014	45.2987	YGL187C
chrVII	150993	152843		36.9433	31.3052	43.7781	29.0607	24.9719	26.7341	26.6271	YGL186C
chrVII	153041	154340		31.6058	37.3257	34.0762	22.3212	23.8363	18.3925	23.1277	YGL185C
chrVII	154502	156273		16.422	58.1863	4.9954	6.95056	6.52955	6.43247	8.42041	YGL184C
chrVII	157852	159229		29.0629	59.5021	17.9981	17.5842	26.848	21.018	31.2008	YGL181W
chrVII	159875	163028		11.2526	41.5493	8.61367	10.5173	27.1056	12.4824	30.4046	YGL180W
chrVII	163314	165180		12.8165	26.4869	15.5817	12.8251	17.0809	14.0438	22.0495	YGL179C
chrVII	166870	171108		36.8673	36.8868	37.1833	52.0674	68.3784	53.224	64.3951	YGL178W
chrVII	174517	175446		23.9572	31.6646	23.4112	28.367	36.6616	30.2529	35.1636	YGL174W
chrVII	175486	180444		46.8217	40.0421	31.8357	43.7827	66.0453	43.9393	52.7365	YGL173C
chrVII	180651	182213		41.4025	39.4729	33.8794	31.5308	33.572	32.7921	32.0143	YGL172W
chrVII	182353	184171	1_RiBi	32.124	24.7849	32.962	44.4496	46.1557	43.0791	41.7814	YGL171W
chrVII	185981	187545		25.68	20.8717	27.2174	44.8036	48.1033	46.1725	49.9671	YGL169W
chrVII	187468	190902		43.2097	41.0019	41.3237	46.107	48.5344	45.3478	49.5574	YGL167C
chrVII	191107	191967		22.2778	33.7638	21.0059	15.9974	14.5454	17.1612	15.1699	YGL166W
chrVII	191890	193336		21.665	23.9295	25.519	23.0193	24.2998	24.672	23.2185	YGL164C
chrVII	193570	196702		19.3642	23.3703	18.067	18.8939	24.9266	20.5244	23.0051	YGL163C
chrVII	197976	199144		52.6743	42.0178	78.3959	63.4196	67.4691	65.6928	67.9556	YGL162W
chrVII	199063	200250		34.1753	46.7737	33.1573	25.3593	25.7433	24.3801	30.6431	YGL161C
chrVII	200423	202407		16.5321	22.1583	29.1336	15.7197	19.5742	18.3092	20.7684	YGL160W
chrVII	202697	203916		17.4202	20.1	16.9932	20.1866	25.9842	22.2056	24.1235	YGL159W
chrVII	206881	208660		2.75161	4.38481	4.8511	4.62395	5.28564	5.35569	5.97209	YGL158W
chrVII	208897	210142		29.427	38.2085	29.6525	23.3272	27.2682	28.1503	30.3623	YGL157W
chrVII	210347	213726		20.1399	27.2209	23.5737	19.3739	22.8508	20.8191	21.9328	YGL156W
chrVII	213941	215607		22.7501	21.9076	24.9024	24.6027	27.491	25.1686	28.5553	YGL155W
chrVII	215275	216099		17.2915	21.654	24.6116	16.4729	18.7104	15.2564	20.5557	YGL154C
chrVII	216218	217347		24.0762	29.6917	26.2852	18.8934	24.7879	23.5088	23.9061	YGL153W
chrVII	217468	221015		23.3666	23.6534	23.3091	27.4997	33.2147	29.6616	34.7688	YGL151W
chrVII	220939	225762		34.4067	37.1435	33.8477	24.963	24.6828	25.3215	26.0058	YGL150C
chrVII	226294	227634		60.4889	44.2301	63.2541	47.3868	31.2681	42.5171	30.9516	YGL148W
chrVII	227624	228375	2_RPG	376.558	107.596	507.011	253.24	94.2131	228.244	101.481	YGL147C
chrVII	228443	229773		52.1523	33.4715	72.7267	63.4286	31.6976	59.6889	28.977	YGL146C
chrVII	230170	232468		18.0886	14.4524	21.2949	20.5871	18.5028	18.7706	19.9101	YGL145W
chrVII	234643	235991		20.7924	23.6606	25.6791	15.4386	14.1299	14.3993	15.1092	YGL143C
chrVII	236125	238163		18.2567	21.1981	25.5585	16.5984	17.8505	15.4823	19.0981	YGL142C
chrVII	238310	241214		16.0616	31.5694	18.9297	13.6653	22.1669	13.0317	20.9236	YGL141W
chrVII	241109	245198		24.9612	25.6394	32.5234	24.5518	25.4842	24.0996	23.3397	YGL140C
chrVII	245401	248459		17.5734	13.4952	18.9148	19.5729	19.52	19.9634	18.4369	YGL139W
chrVII	249844	252910		51.2642	39.0468	56.663	43.8476	44.6882	44.5662	36.9421	YGL137W
chrVII	252784	253927		31.6031	25.3327	51.9999	33.8638	26.4559	31.9664	21.3533	YGL136C
chrVII	254517	255388	2_RPG	330.603	60.3543	492.531	269.685	89.0999	251.371	75.6438	YGL135W
chrVII	255565	257072		35.439	25.0786	38.1401	31.0563	27.2341	34.7035	23.6906	YGL134W
chrVII	257505	261689		27.4216	21.1757	48.4941	24.2825	28.8431	29.2719	24.4977	YGL133W
chrVII	261545	265930		16.6392	20.9536	25.52	16.1718	18.1288	17.4971	17.307	YGL131C
chrVII	266083	267665		21.2794	27.9073	36.007	19.3525	21.2276	19.9032	23.211	YGL130W
chrVII	267595	269188		24.8515	27.2604	29.8411	24.3956	25.7911	25.034	28.618	YGL129C
chrVII	269149	270169		26.5838	26.6379	18.9139	19.0684	20.6211	20.1545	22.6484	YGL128C
chrVII	270242	270840		37.6279	44.0596	25.2726	27.2888	30.0066	33.5132	32.5819	YGL127C
chrVII	270960	272395		36.246	43.1175	22.3162	12.5443	14.0201	14.6441	15.1534	YGL126W
chrVII	272377	274719		39.6001	63.0404	41.8329	19.112	20.9416	19.3763	20.3573	YGL125W
chrVII	274763	276748		15.4217	17.4683	31.74	15.4792	14.4761	14.115	15.0002	YGL124C
chrVII	277518	278469	2_RPG	421.301	83.4866	536.145	360.826	97.216	326.213	99.8613	YGL123W
chrVII	278695	280568		88.6361	135.435	66.5423	81.2786	114.396	83.5067	130.363	YGL122C
chrVII	280743	281277		44.378	80.269	27.6378	40.1904	54.035	44.5183	54.1001	YGL121C
chrVII	281498	284002	1_RiBi	41.4846	23.5393	34.2027	49.0254	55.9202	50.2244	61.7794	YGL120C
chrVII	284389	286080		16.0073	17.1937	19.5611	16.3258	20.9516	16.0058	20.7732	YGL119W
chrVII	288394	289421		43.5516	41.7369	38.9227	41.5912	36.0196	35.5946	36.5398	YGL117W
chrVII	289667	291746		32.6668	31.1359	26.9861	32.5812	37.7665	36.8818	35.384	YGL116W
chrVII	291884	293083		38.2159	34.8298	32.7769	40.4126	42.7002	39.1231	39.9682	YGL115W
chrVII	293205	295701		22.2868	24.1144	33.765	20.9689	20.6713	22.3887	23.6445	YGL114W
chrVII	295895	298160		18.5013	20.1446	18.2211	17.1966	19.636	17.1401	20.852	YGL113W
chrVII	298032	299762		25.9863	23.1131	22.7059	31.5615	35.7174	32.4722	38.2474	YGL112C
chrVII	299924	301521	1_RiBi	33.3797	27.0073	31.3829	44.9606	53.8049	49.6836	64.463	YGL111W
chrVII	303527	304165		46.8984	39.7919	61.9825	53.9655	54.3155	57.7625	50.353	YGL108C
chrVII	304239	306331		31.4022	30.5185	30.3966	30.6039	32.4196	30.9502	37.3202	YGL107C
chrVII	306495	307258		66.1547	63.6673	72.895	52.4508	50.0853	48.997	54.4345	YGL106W
chrVII	307371	308669	1_RiBi	85.0004	70.7373	100.116	76.4046	83.4161	76.7588	86.1355	YGL105W
chrVII	308549	310188		14.6495	28.4399	27.2584	11.7348	13.4586	12.3566	15.4007	YGL104C
chrVII	310929	312009	2_RPG	702.42	72.4244	1075.55	615.206	183.535	585.662	182.154	YGL103W
chrVII	312142	313092		62.4789	38.5638	80.7022	79.0209	84.4077	81.2998	77.8356	YGL101W
chrVII	313196	314373		27.8817	25.1018	28.639	24.499	28.0878	25.2718	27.5019	YGL100W
chrVII	314563	316596		32.4946	18.9871	30.4091	39.4885	44.4164	43.1926	44.806	YGL099W
chrVII	317283	318660		28.165	48.8328	25.6553	30.0562	33.4084	30.0197	33.4639	YGL098W
chrVII	321715	323361		41.5779	40.6875	89.1618	38.9797	43.2211	41.5522	44.8725	YGL097W
chrVII	325285	326280		10.381	18.0325	39.2885	8.60628	12.8348	10.9691	16.3814	YGL096W
chrVII	328780	330684		17.4027	22.0339	18.6444	18.0221	22.1123	18.55	26.0538	YGL095C
chrVII	330931	334653		25.896	27.4654	15.6021	23.1152	31.1023	24.8495	31.6434	YGL094C
chrVII	334827	337678		23.5386	27.7631	13.2453	21.7219	27.5226	20.8382	27.0628	YGL093W
chrVII	337770	341881		38.0158	27.4986	36.1287	38.1553	39.5311	37.5135	38.8718	YGL092W
chrVII	341897	343109		26.9659	39.5303	25.3667	24.8733	34.2604	24.355	36.217	YGL091C
chrVII	343277	344676		20.6679	18.1538	20.3824	18.0645	23.6939	23.2476	24.5573	YGL090W
chrVII	346289	346963		129.553	132.598	91.8426	132.005	156.07	135.367	167.971	YGL087C
chrVII	347118	349454		26.5546	26.0193	23.7824	33.402	38.6221	34.2746	38.6026	YGL086W
chrVII	349557	350668		21.7809	28.3158	25.5042	23.2393	27.6248	24.4497	28.8827	YGL085W
chrVII	350526	352357		20.7867	30.4237	16.8732	22.7039	25.5321	23.3987	28.8499	YGL084C
chrVII	352944	355597		26.1922	26.7079	24.6554	22.0331	25.8872	23.0606	29.6115	YGL083W
chrVII	355736	357133		26.0181	29.9812	24.7396	17.6868	19.6478	17.4286	20.7025	YGL082W
chrVII	358555	359296		31.4288	37.0373	24.1885	41.5238	45.1543	44.9568	50.7989	YGL080W
chrVII	359401	360243		26.6269	24.2874	27.1219	33.0988	39.8896	33.585	42.2044	YGL079W
chrVII	360098	361941		64.964	43.8902	79.6757	94.8699	105.686	98.7961	120.689	YGL078C
chrVII	362133	364086		69.2924	41.1775	66.4145	68.4692	76.8561	64.1948	72.5911	YGL077C
chrVII	364225	366025	2_RPG	255.854	36.2886	404.916	259.247	58.5006	230.442	59.0875	YGL076C
chrVII	366569	368286		64.4834	54.8004	60.835	92.9176	96.5513	91.7174	88.4365	YGL075C
chrVII	368445	371313		46.8691	84.8726	37.5333	38.8783	56.6063	39.1076	64.4466	YGL073W
chrVII	371549	374328		50.9602	53.4016	48.8621	48.1926	45.5806	49.3611	48.5082	YGL071W
chrVII	374126	374863		64.513	57.529	51.578	81.4084	81.4604	78.2608	86.7552	YGL070C
chrVII	375039	375781		61.3109	59.8444	48.1371	55.8576	61.3813	58.8788	62.4749	YGL068W
chrVII	375993	377280		29.0273	31.1969	28.9415	41.1053	44.714	37.421	45.8896	YGL067W
chrVII	377417	379812		26.7298	34.9289	25.2865	24.0609	27.5891	24.404	32.4856	YGL066W
chrVII	379705	381326		24.3049	27.8937	21.8799	27.2321	33.898	29.9509	36.3593	YGL065C
chrVII	381468	383219		21.3278	22.9644	21.0521	24.0712	25.8793	27.0898	30.2306	YGL064C
chrVII	383422	384885		30.9529	37.3755	22.56	19.8107	22.6066	20.2972	24.8492	YGL063W
chrVII	388868	389783		23.3728	20.4373	20.4595	24.9834	26.1844	24.8725	29.1933	YGL061C
chrVII	389934	392038		15.7465	18.5957	14.7455	14.947	16.6171	14.5707	18.8598	YGL060W
chrVII	393889	394726		50.0479	61.7314	42.9152	47.2589	57.4886	42.6298	56.9272	YGL058W
chrVII	394805	395835		24.3125	30.4199	24.6539	22.8477	29.81	24.5787	30.4635	YGL057C
chrVII	395944	397715		58.4471	41.8302	51.7298	58.0691	58.6684	53.6043	65.3952	YGL056C
chrVII	398280	400385		189.225	71.1444	153.092	219.114	219.719	203.764	211.56	YGL055W
chrVII	400287	401367		65.2193	51.0182	56.6499	134.44	162.875	140.474	153.346	YGL054C
chrVII	402486	403469		20.2054	32.2835	21.9947	16.5139	21.2814	18.5242	23.4331	YGL053W
chrVII	403677	404855		17.7483	27.417	16.0954	20.464	21.0715	18.4604	20.2598	YGL051W
chrVII	405731	406736		31.3444	57.6819	30.1364	40.9491	39.4335	38.1513	44.8246	YGL050W
chrVII	406473	409777		25.6501	57.9594	28.8424	21.076	25.9548	23.2501	29.932	YGL049C
chrVII	409972	411313		55.7289	119.042	27.1958	50.9882	89.7337	47.5128	94.0042	YGL048C
chrVII	411464	412203		61.0979	123.168	40.0932	66.4961	90.0383	61.2807	89.5241	YGL047W
chrVII	413763	415931	3_MSN2	17.4285	24.0934	46.2437	23.357	18.0715	24.5237	23.7521	YGL045W
chrVII	415864	417260		26.2957	30.5603	21.7749	27.5965	32.3249	27.6006	36.3766	YGL044C
chrVII	417460	418620		46.2124	48.1668	38.252	41.0027	38.3194	37.513	44.7292	YGL043W
chrVII	418764	419411		38.1652	48.3894	33.1436	57.3062	54.7887	56.94	54.7634	YGL041W-A
chrVII	419321	420708		55.0122	77.6518	54.292	41.1256	52.9335	43.3611	55.2498	YGL040C
chrVII	423819	425130		28.4383	39.725	32.2933	29.6872	35.9661	28.8107	39.5301	YGL039W
chrVII	425073	426848		49.5469	59.075	39.396	39.3696	49.6915	34.8732	44.4502	YGL038C
chrVII	427155	428066		69.3564	203.065	60.2947	32.1871	58.9894	27.8867	58.045	YGL037C
chrVII	428559	431443		20.0703	33.9329	31.334	17.7373	24.5251	19.7088	25.6896	YGL036W
chrVII	431292	433176		42.1743	37.2976	15.7665	29.6607	33.8381	31.6547	36.8358	YGL035C
chrVII	437401	438397	2_RPG	277.786	38.3265	391.353	332.918	51.9319	296.026	48.4208	YGL031C
chrVII	438944	439738	2_RPG	471.724	87.0559	611.205	513.317	173.634	466.734	159.548	YGL030W
chrVII	439995	440658	1_RiBi	60.3899	32.6638	57.6187	125.557	137.517	133.133	123.995	YGL029W
chrVII	440980	443391		134.097	69.6291	130.595	151.721	136.484	148.394	131.692	YGL028C
chrVII	443548	446173		27.8857	26.5618	27.7697	23.9503	24.1916	26.8772	26.1711	YGL027C
chrVII	446329	448578		46.9308	51.2517	49.441	31.4091	34.6501	27.2815	33.2373	YGL026C
chrVII	448706	449994		39.1925	40.9884	33.2319	26.8459	29.8865	32.4658	30.1415	YGL025C
chrVII	450068	452152		30.7497	29.8872	30.4439	19.4488	19.2184	17.9987	22.1942	YGL023C
chrVII	452309	454733		54.3834	48.4299	36.5635	41.0238	41.52	41.7005	44.7473	YGL022W
chrVII	454784	457171		39.4175	35.3044	28.9976	42.5217	44.7352	43.9997	42.3169	YGL021W
chrVII	457082	457933		34.3641	36.9659	32.4411	36.2912	36.9884	32.3378	35.2309	YGL020C
chrVII	458060	459102		47.4364	46.0042	47.3576	42.264	41.3501	40.168	46.1852	YGL019W
chrVII	458778	459698		30.2266	31.6305	35.1642	25.6096	27.7713	24.4951	31.0147	YGL018C
chrVII	459826	461453		23.1236	21.5791	29.8208	19.4654	20.5298	17.7896	20.5647	YGL017W
chrVII	461596	465119		16.7112	15.8459	15.8091	18.6847	21.6705	20.0687	24.8292	YGL016W
chrVII	465727	468903		42.6494	35.2014	38.0706	46.2785	48.3322	45.2661	53.875	YGL014W
chrVII	469053	472432		30.7179	45.4186	19.8159	31.0641	48.3231	29.7883	45.7573	YGL013C
chrVII	472805	474373		45.3615	75.1614	45.385	34.9191	41.5327	35.1084	48.3608	YGL012W
chrVII	474360	475282		75.3989	114.66	32.3773	82.5533	132.21	68.6511	144.31	YGL011C
chrVII	475475	476242		52.5962	95.1224	25.959	42.292	75.0146	38.8519	76.5724	YGL010W
chrVII	476169	478730		125.788	108.729	32.8342	102.584	120.47	86.4784	117.235	YGL009C
chrVII	479394	482901		738.435	350.575	455.483	551.071	481.231	527.663	437.173	YGL008C
chrVII	485453	489577		19.2994	38.8385	14.0832	14.7536	20.7652	15.519	24.4637	YGL006W
chrVII	489492	490575		25.8594	36.5952	19.5844	28.7173	32.0318	30.1872	36.964	YGL005C
chrVII	490740	491978		26.5574	43.1863	19.7282	25.8203	28.4958	23.1624	29.3997	YGL004C
chrVII	492325	494276		37.354	53.6111	23.9243	38.5554	46.9549	38.9081	45.5857	YGL003C
chrVII	494405	495340		32.1952	40.6089	23.2224	31.3334	41.4528	33.9407	40.0345	YGL002W
chrVII	495328	496610		37.5911	51.3688	62.7505	28.9804	37.7188	28.1715	34.2272	YGL001C
chrVII	497064	498051		43.126	37.6991	38.0553	65.6722	75.2025	70.0639	68.9075	YGR001C
chrVII	498228	499914		31.0086	36.2217	33.4529	32.2762	34.2445	31.7601	33.0112	YGR002C
chrVII	500103	502612		18.7741	22.814	17.0901	23.0811	26.531	22.3948	28.527	YGR003W
chrVII	502909	504574		19.4242	25.0876	12.4786	23.5417	25.5134	22.9361	24.1681	YGR004W
chrVII	504552	505888		29.5457	37.6872	21.4572	28.6095	31.3748	30.8504	33.0653	YGR005C
chrVII	506922	508081		55.6708	77.7013	38.9486	45.8373	52.7053	42.0817	53.3106	YGR007W
chrVII	507971	508544		48.2323	68.2234	34.5577	18.1284	23.0556	21.226	31.0036	YGR008C
chrVII	508993	511072		34.5357	45.102	23.2446	29.093	34.0601	30.3399	41.1625	YGR009C
chrVII	511421	513004		32.4458	42.3487	19.4953	34.6112	38.4122	35.9614	40.2718	YGR010W
chrVII	513129	514373		29.2924	32.3729	19.0877	24.7447	25.8923	24.4002	27.4423	YGR012W
chrVII	514530	516684		41.035	47.4168	34.4673	31.707	31.8482	29.649	31.8396	YGR013W
chrVII	516667	520991		80.3801	65.4569	60.9594	53.1851	51.1635	52.0779	47.2015	YGR014W
chrVII	520982	522094		30.5356	36.7335	22.6057	38.6121	40.6209	36.1667	39.724	YGR015C
chrVII	522237	522989		23.3822	27.5325	19.1618	33.9997	37.0316	35.6293	35.6799	YGR016W
chrVII	523532	524795		59.4209	75.8338	48.1592	58.0414	61.0765	55.1929	66.5256	YGR017W
chrVII	525190	526737		39.9803	70.3422	52.6375	22.2416	32.6368	23.8819	36.0434	YGR019W
chrVII	526838	527441		65.2095	66.3795	54.2854	49.2498	51.6957	53.4237	61.1012	YGR020C
chrVII	527583	528583		36.9731	42.5217	38.9318	24.8946	32.156	26.3498	34.3038	YGR021W
chrVII	529106	531172	3_MSN2	20.3264	36.8796	43.0852	15.9905	18.5805	18.2967	23.3113	YGR023W
chrVII	531800	532649		34.8702	35.0001	31.1659	52.204	52.9853	45.7796	55.103	YGR024C
chrVII	532805	534080		49.7571	46.2275	51.8413	75.1388	54.6332	72.2497	55.5477	YGR026W
chrVII	534068	534785	2_RPG	316.287	72.3311	405.661	456.883	111.314	406.242	107.61	YGR027C
chrVII	542039	543439		18.6317	21.0161	20.8445	16.0357	17.5907	18.7727	18.6342	YGR028W
chrVII	543528	544301		26.4962	30.7927	30.6655	27.4975	28.5239	26.7273	29.4213	YGR029W
chrVII	545432	546170		117.765	88.2292	86.6602	190.905	183.947	194.358	206.89	YGR030C
chrVII	546354	547779		42.2736	48.1985	24.1809	30.876	30.3521	29.9356	32.2871	YGR031W
[truncated: 3,046 more rows]
