# Supplementary material for: A ribosome assembly stress response regulates transcription to maintain proteome homeostasis
Source: eLife. 2019 May 24;8:e45002. doi: 10.7554/eLife.45002 (PMC6579557; doi:10.7554/eLife.45002)
Supplement: Supplementary file 3. [file elife-45002-supp3.xlsx]

## Sheet: Feuil1
Supplementary File 3
Number of peptides purified in an insoluble fraction from Top1/2-AID cells treated for 20 minutes with either auxin or vehicle. Category (cat): Hsf1 genes (Hsf1), Ribosome Biogenesis genes (RiBi), Msn2/4 genes (Msn2), Ribosomal Protein Genes (RPG)										Proteins most enriched (Δpeptides(Auxin-Vehicle)>3) in insoluble fraction following topoisomerases depletion. n=3 Category (cat): Hsf1 genes (Hsf1), Ribosome Biogenesis genes (RiBi), Msn2 genes (Msn2), Ribosomal Protein genes (RPG)
Alternate ID	name	cat	#1 Top1-AID Top2-AID 20min Veh	#1 Top1-AID Top2-AID 20min Aux	#2 Top1-AID Top2-AID 20min Veh	#2 Top1-AID Top2-AID 20min Aux	#2 Top1-AID Top2-AID 20min Veh	#2 Top1-AID Top2-AID 20min Aux		Alternate ID	name	cat
YAL025C	MAK16	1_RiBi	0	5	0	5	0	9		YNL178W	RPS3	2_RPG
YAL029C	MYO4		0	4	0	4	3	6		YBL061C	SKT5
YAL035W	FUN12	1_RiBi	4	5	0	6	6	6		YFR031C	SMC2
YAL036C	RBG1		6	8	0	9	6	8		YDL191W	RPL35A	2_RPG
YBR087W	RFC5		2	6	2	5	4	7		YDR025W	RPS11A	2_RPG
YBL004W	UTP20	1_RiBi	0	15	0	19	0	23		YGR155W	CYS4	1_RiBi
YBL022C	PIM1		0	5	0	6	4	5		YDR502C	SAM2
YBL030C	PET9		8	11	8	15	13	19		YML074C	FPR3	1_RiBi
YBL039C	URA7	1_RiBi	9	18	10	14	18	22		YOL080C	REX4
YBL045C	COR1		5	8	5	13	11	14		YDR188W	CCT6
YBL061C	SKT5		2	5	0	6	3	8		YHL033C	RPL8A	2_RPG
YBL072C	RPS8A	2_RPG	4	10	4	7	7	13		YIL078W	THS1
YBL079W	NUP170		0	5	0	8	5	9		YER105C	NUP157
YBL087C	RPL23A	2_RPG	2	5	3	6	11	8		YLR441C	RPS1A	2_RPG
YBL092W	RPL32	2_RPG	3	6	0	5	6	10		YKL181W	PRS1	1_RiBi
YBL099W	ATP1	3_MSN2	21	22	15	26	24	30		YPL220W	RPL1A	2_RPG
YBR009C	HHF1		4	6	4	6	9	12		YBL072C	RPS8A	2_RPG
YBR025C	OLA1		10	18	11	17	23	31		YJR145C	RPS4A	2_RPG
YBR031W	RPL4A	2_RPG	4	13	3	14	11	22		YOL127W	RPL25	2_RPG
YBR039W	ATP3		5	8	5	10	8	14		YLR336C	SGD1	1_RiBi
YBR054W	YRO2		3	3	3	3	5	5		YPR043W	RPL43A	2_RPG
YBR073W	RDH54		0	7	0	3	0	10		YHL015W	RPS20	2_RPG
YBR079C	RPG1		2	4	0	4	2	10		YOR272W	YTM1	1_RiBi
YBR080C	SEC18		5	10	2	9	14	17		YBR039W	ATP3
YBR084C-A	RPL19A	2_RPG	4	12	2	9	7	16		YGL147C	RPL9A	2_RPG
YBR084W	MIS1		6	6	3	12	7	14		YDR412W	RRP17
YAL005C	SSA1	4_HSF1	7	13	5	21	22	28		YLR274W	MCM5
YBR106W	PHO88		4	4	2	5	8	9		YLR344W	RPL26A	2_RPG
YBR121C	GRS1	1_RiBi	3	9	0	10	4	11		YNL002C	RLP7	1_RiBi
YBR127C	VMA2		9	20	10	22	19	34		YPL081W	RPS9A	2_RPG
YBR142W	MAK5		5	12	0	9	7	10		YIL133C	RPL16A	2_RPG
YBR143C	SUP45		7	15	8	18	8	21		YNL069C	RPL16B	2_RPG
YBR146W	MRPS9		0	3	0	3	3	4		YDR238C	SEC26
YBR160W	CDC28		6	7	4	8	7	11		YBL030C	PET9
YBR177C	EHT1		2	3	0	4	3	3		YPL210C	SRP72
YBR189W	RPS9B	2_RPG	9	15	7	15	13	20		YLR075W	RPL10	2_RPG
YBR191W	RPL21A	2_RPG	4	6	4	6	6	8		YGR231C	PHB2
YBR218C	PYC2		0	6	0	4	0	5		YHR169W	DBP8	1_RiBi
YBR221C	PDB1		0	4	4	8	4	12		YFL045C	SEC53
YBR227C	MCX1		6	8	0	7	10	11		YMR080C	NAM7
YBR247C	ENP1	1_RiBi	0	14	0	14	4	17		YOR151C	RPB2
YBR251W	MRPS5		4	5	0	4	4	4		YKL078W	DHR2	1_RiBi
YBR263W	SHM1		0	3	0	5	2	4		YOR361C	PRT1	1_RiBi
YCL044C	MGR1		2	4	0	4	3	5		YML063W	RPS1B	2_RPG
YCL054W	SPB1	1_RiBi	0	4	0	6	0	9		YDL014W	NOP1	1_RiBi
YCL061C	MRC1		0	6	0	5	0	8		YOR317W	FAA1
YCR012W	PGK1		8	7	7	18	10	21		YER086W	ILV1
YCR035C	RRP43		0	3	0	6	0	7		YOR063W	RPL3	2_RPG
YCR057C	PWP2	1_RiBi	0	3	0	5	0	8		YAL005C	SSA1	4_HSF1
YDL008W	APC11		0	3	0	3	0	3		YLR051C	FCF2	1_RiBi
YDL014W	NOP1	1_RiBi	4	8	0	13	15	21		YJR123W	RPS5	2_RPG
YDL055C	PSA1		3	8	4	9	5	7		YOR164C	GET4
YDL075W	RPL31A	2_RPG	0	5	2	4	5	5		YGR285C	ZUO1
YDL082W	RPL13A	2_RPG	3	7	4	6	7	9		YGR103W	NOP7	1_RiBi
YDL084W	SUB2		0	3	0	4	2	4		YMR116C	ASC1	2_RPG
YDL126C	CDC48		4	9	0	15	10	17		YDR087C	RRP1	1_RiBi
YDL131W	LYS21		0	3	0	5	3	5		YOR145C	PNO1	1_RiBi
YDL140C	RPO21		0	9	0	10	0	14		YCR035C	RRP43
YDL143W	CCT4		4	9	3	7	7	11		YLR384C	IKI3
YDL145C	COP1		2	13	2	13	8	18		YKL106W	AAT1
YDL153C	SAS10	1_RiBi	0	3	0	3	0	5		YHR088W	RPF1	1_RiBi
YDL171C	GLT1		7	24	5	19	8	28		YPL131W	RPL5	2_RPG
YDL182W	LYS20		2	4	2	6	3	6		YPL063W	TIM50
YDL191W	RPL35A	2_RPG	2	8	0	6	3	8		YER074W	RPS24A	2_RPG
YDL192W	ARF1		3	3	2	6	4	9		YML073C	RPL6A	2_RPG
YDL229W	SSB1		14	18	14	21	16	25		YJL012C	VTC4
YDR011W	SNQ2		25	15	13	24	38	43		YMR143W	RPS16A	2_RPG
YDR012W	RPL4B	2_RPG	4	11	3	13	10	19		YLR180W	SAM1
YDR021W	FAL1	1_RiBi	0	3	0	4	3	6		YBR189W	RPS9B	2_RPG
YDR025W	RPS11A	2_RPG	4	10	3	9	8	13		YLL045C	RPL8B	2_RPG
YDR033W	MRH1		3	4	4	3	7	8		YBR121C	GRS1	1_RiBi
YDR060W	MAK21	1_RiBi	0	9	0	13	0	15		YOR133W	EFT1	1_RiBi
YDR064W	RPS13	2_RPG	5	9	3	8	7	12		YDL008W	APC11
YDR071C	PAA1		0	4	2	3	0	4		YDR097C	MSH6
YDR083W	RRP8	1_RiBi	4	11	2	11	11	15		YGL001C	ERG26
YDR087C	RRP1	1_RiBi	0	5	0	5	0	7		YIL079C	AIR1
YDR091C	RLI1	1_RiBi	2	6	0	4	3	7		YJL063C	MRPL8
YDR097C	MSH6		0	3	0	3	0	3		YML092C	PRE8
YDR127W	ARO1		10	20	5	24	19	26		YPL004C	LSP1
YDR141C	DOP1		3	5	0	9	5	11		YBR087W	RFC5
YDR148C	KGD2		2	3	2	4	0	4		YGR132C	PHB1
YDR172W	SUP35		2	8	0	7	3	11		YLR448W	RPL6B	2_RPG
YDR188W	CCT6		3	7	0	8	4	9		YPL086C	ELP3
YDR190C	RVB1		4	7	2	8	7	10		YDR021W	FAL1	1_RiBi
YDR194C	MSS116		3	3	0	6	6	9		YGL021W	ALK1
YDR232W	HEM1		2	4	0	4	2	5		YIL093C	RSM25
YDR238C	SEC26		0	11	2	8	4	10		YKR092C	SRP40	1_RiBi
YDR298C	ATP5		0	3	4	5	7	9		YPL118W	MRP51
YDR300C	PRO1		2	9	0	6	4	6		YAL029C	MYO4
YDR322W	MRPL35		0	3	0	5	3	4		YHR010W	RPL27A	2_RPG
YDR337W	MRPS28		2	5	0	4	5	5		YML103C	NUP188
YDR345C	HXT3		5	6	6	10	13	14		YOR123C	LEO1
YDR356W	SPC110		13	16	11	12	27	20		YOR234C	RPL33B	2_RPG
YDR375C	BCS1		2	4	0	4	2	3		YJR113C	RSM7
YDR380W	ARO10		2	8	0	6	0	4		YPL143W	RPL33A	2_RPG
YDR394W	RPT3		2	6	0	5	4	12		YKL126W	YPK1
YDR412W	RRP17		0	4	0	6	0	6		YHR197W	RIX1	1_RiBi
YDR449C	UTP6	1_RiBi	0	11	0	6	0	10		YML093W	UTP14	1_RiBi
YDR450W	RPS18A	2_RPG	5	8	5	7	10	16		YOL120C	RPL18A	2_RPG
YDR502C	SAM2		8	12	3	10	11	16		YLL007C	YLL007C
YDR507C	GIN4		0	4	0	6	4	7		YKL180W	RPL17A	2_RPG
YDR545W	YRF1-1		3	8	0	18	5	21		YDR190C	RVB1
YEL002C	WBP1		2	5	3	9	3	7		YGR173W	RBG2
YEL021W	URA3		4	7	3	6	5	7		YIL142W	CCT2
YEL031W	SPF1		4	5	0	13	8	17		YPR111W	DBF20
YEL034W	HYP2		2	4	0	3	6	6		YPR181C	SEC23
YEL054C	RPL12A	2_RPG	2	3	3	3	7	6		YDR507C	GIN4
YER006W	NUG1	1_RiBi	3	15	0	16	3	19		YGL031C	RPL24A	2_RPG
YER014W	HEM14		0	6	0	4	0	5		YPR133C	SPN1
YER017C	AFG3		3	7	0	3	5	4		YMR246W	FAA4
YER025W	GCD11	1_RiBi	2	6	0	6	4	6		YBR080C	SEC18
YER036C	ARB1		9	19	9	18	22	26		YMR242C	RPL20A	2_RPG
YER049W	TPA1		5	14	4	14	9	19		YKR059W	TIF1	1_RiBi
YER070W	RNR1		4	6	0	11	5	13		YNL096C	RPS7B	2_RPG
YER074W	RPS24A	2_RPG	6	13	3	10	10	17		YBL045C	COR1
YER086W	ILV1		9	18	8	22	20	26		YGL129C	RSM23
YER090W	TRP2		0	5	0	3	0	5		YOR217W	RFC1
YER105C	NUP157		0	4	0	11	2	7		YBR142W	MAK5
YER125W	RSP5		5	3	0	7	5	6		YML124C	TUB3
YER126C	NSA2	1_RiBi	0	9	0	7	5	16		YLR223C	IFH1
YER133W	GLC7		2	5	2	3	0	7		YPL204W	HRR25
YER164W	CHD1		0	5	0	7	0	9		YOL094C	RFC4
YER165W	PAB1		0	4	0	14	4	16		YGL009C	LEU1
YER178W	PDA1		0	3	0	9	3	5		YFL004W	VTC2
YER182W	FMP10		0	3	0	3	3	4		YKL029C	MAE1
YFL002C	SPB4		0	9	0	11	0	11		YLR419W	YLR419W
YFL004W	VTC2		0	3	0	4	0	4		YDR091C	RLI1	1_RiBi
YFL005W	SEC4		3	4	0	7	5	4		YDL143W	CCT4
YFL008W	SMC1		0	3	0	5	4	4		YOR213C	SAS5
YFL016C	MDJ1	4_HSF1	0	8	0	5	10	12		YHR148W	IMP3	1_RiBi
YFL018C	LPD1		5	6	4	12	8	13		YLR002C	NOC3	1_RiBi
YFL038C	YPT1		4	3	0	7	3	9		YBL039C	URA7	1_RiBi
YFL039C	ACT1		7	11	8	7	17	18		YOR096W	RPS7A	2_RPG
YFL045C	SEC53		2	8	2	10	6	12		YBL092W	RPL32	2_RPG
YFR002W	NIC96		5	8	0	12	9	8		YOL086C	ADH1
YFR009W	GCN20	1_RiBi	9	13	3	11	12	9		YGR159C	NSR1	1_RiBi
YFR031C	SMC2		0	3	0	6	2	7		YOR158W	PET123
YFR031C-A	RPL2A	2_RPG	5	11	2	10	8	16		YEL002C	WBP1
YGL001C	ERG26		0	3	0	3	0	3		YGL103W	RPL28	2_RPG
YGL008C	PMA1		22	24	21	27	55	55		YDR380W	ARO10
YGL009C	LEU1		0	8	0	3	0	4		YIL043C	CBR1
YGL011C	SCL1		3	3	0	3	2	3		YGL123W	RPS2	2_RPG
YGL021W	ALK1		0	3	0	4	2	5		YOR326W	MYO2
YGL022W	STT3		4	4	2	10	4	7		YLR044C	PDC1
YGL031C	RPL24A	2_RPG	3	7	2	8	9	12		YMR049C	ERB1	1_RiBi
YGL048C	RPT6		2	3	2	5	4	5		YBL079W	NUP170
YGL055W	OLE1		2	3	2	6	7	14		YNL182C	IPI3	1_RiBi
YGL064C	MRH4		0	7	0	8	9	10		YHR170W	NMD3	1_RiBi
YGL076C	RPL7A	2_RPG	7	14	3	15	13	17		YGR092W	DBF2
YGL078C	DBP3		12	17	9	17	18	28		YDR083W	RRP8	1_RiBi
YGL103W	RPL28	2_RPG	4	8	2	8	7	11		YER036C	ARB1
YGL120C	PRP43	1_RiBi	0	10	0	15	5	18		YHR065C	RRP3	1_RiBi
YGL123W	RPS2	2_RPG	4	9	2	9	10	14		YGL076C	RPL7A	2_RPG
YGL129C	RSM23		7	10	0	8	4	7		YPL198W	RPL7B	2_RPG
YGL137W	SEC27		3	5	0	7	3	11		YDL153C	SAS10	1_RiBi
YGL147C	RPL9A	2_RPG	6	10	4	9	9	15		YLR029C	RPL15A	2_RPG
YGL191W	COX13		3	3	0	3	0	4		YOL010W	RCL1	1_RiBi
YGL195W	GCN1		2	26	3	16	12	23		YER090W	TRP2
YGL201C	MCM6		2	4	0	5	3	4		YPL266W	DIM1	1_RiBi
YGL207W	SPT16		0	6	0	9	2	15		YLR017W	MEU1
YGL245W	GUS1		6	16	3	11	11	20		YNL067W	RPL9B	2_RPG
YGR086C	PIL1		5	6	3	10	6	9		YHR128W	FUR1	1_RiBi
YGR090W	UTP22		0	3	0	15	2	19		YBR218C	PYC2
YGR092W	DBF2		0	8	0	8	3	7		YER014W	HEM14
YGR094W	VAS1	1_RiBi	3	4	0	8	4	9		YDR064W	RPS13	2_RPG
YGR103W	NOP7	1_RiBi	0	9	0	4	0	7		YIL022W	TIM44
YGR118W	RPS23A	2_RPG	2	6	0	6	5	5		YKL081W	TEF4	1_RiBi
YGR132C	PHB1		4	8	5	8	7	10		YLR100W	ERG27
YGR148C	RPL24B	2_RPG	2	5	0	6	6	8		YHL001W	RPL14B	2_RPG
YGR155W	CYS4	1_RiBi	2	5	0	7	4	9		YIL075C	RPN2
YGR159C	NSR1	1_RiBi	0	4	0	5	5	9		YLR305C	STT4
YGR165W	MRPS35		2	4	0	4	3	4		YDL126C	CDC48
YGR173W	RBG2		2	5	0	6	3	6		YDR127W	ARO1
YGR175C	ERG1		2	8	0	8	8	7		YMR012W	CLU1
YGR192C	TDH3		9	10	5	12	12	17		YOR259C	RPT4
YGR202C	PCT1		0	6	0	3	2	4		YHR031C	RRM3
YGR204W	ADE3		4	5	0	7	3	5		YBR221C	PDB1
YGR231C	PHB2		2	10	2	9	6	12		YCR057C	PWP2	1_RiBi
YGR234W	YHB1		6	9	5	10	10	21		YDR394W	RPT3
YGR240C	PFK1		5	10	4	11	9	21		YCL061C	MRC1
YGR245C	SDA1	1_RiBi	0	11	0	13	0	19		YBR025C	OLA1
YGR254W	ENO1		3	3	5	8	0	10		YNL209W	SSB2
YGR264C	MES1	1_RiBi	10	16	7	14	18	20		YDR172W	SUP35
YGR267C	FOL2		3	5	2	7	6	9		YFR031C-A	RPL2A	2_RPG
YGR280C	PXR1		2	4	0	3	3	5		YOR310C	NOP58
YGR281W	YOR1		10	3	6	12	16	16		YPL235W	RVB2
YGR285C	ZUO1		0	7	0	4	0	7		YLR175W	CBF5	1_RiBi
YGR296W	YRF1-3		3	8	0	19	5	24		YKL104C	GFA1
YHL001W	RPL14B	2_RPG	3	8	3	8	5	10		YPL090C	RPS6A	2_RPG
YHL011C	PRS3	1_RiBi	2	5	0	4	4	5		YMR205C	PFK2
YHL015W	RPS20	2_RPG	5	10	4	8	5	11		YLR342W	FKS1
YHL033C	RPL8A	2_RPG	9	15	6	14	16	21		YPL226W	NEW1
YHR007C	ERG11		5	7	5	8	8	12		YAL025C	MAK16	1_RiBi
YHR010W	RPL27A	2_RPG	3	7	2	6	7	10		YCL054W	SPB1	1_RiBi
YHR020W	YHR020W		6	13	4	13	14	25		YMR129W	POM152
YHR027C	RPN1		0	6	0	4	2	4		YDL229W	SSB1
YHR031C	RRM3		0	3	0	4	0	8		YER164W	CHD1
YHR064C	SSZ1		3	9	0	6	3	4		YBR084C-A	RPL19A	2_RPG
YHR065C	RRP3	1_RiBi	4	14	0	11	12	16		YGL245W	GUS1
YHR073W	OSH3		6	5	0	6	6	7		YDR012W	RPL4B	2_RPG
YHR088W	RPF1	1_RiBi	0	5	0	6	2	9		YKR001C	VPS1
YHR094C	HXT1		4	3	3	8	10	11		YNL297C	MON2
YHR111W	UBA4		0	6	0	6	4	5		YBR073W	RDH54
YHR120W	MSH1		6	10	2	6	8	9		YDR449C	UTP6	1_RiBi
YHR128W	FUR1	1_RiBi	0	5	2	6	2	7		YNL224C	SQS1
YHR148W	IMP3	1_RiBi	0	6	0	4	0	4		YPL126W	NAN1	1_RiBi
YHR169W	DBP8	1_RiBi	3	12	2	9	5	11		YGL078C	DBP3
YHR170W	NMD3	1_RiBi	3	10	0	8	6	10		YOR086C	TCB1
YHR174W	ENO2		6	7	8	15	10	22		YLR249W	YEF3	1_RiBi
YHR197W	RIX1	1_RiBi	0	7	0	4	0	3		YER049W	TPA1
YIL022W	TIM44		0	4	0	5	0	5		YDL145C	COP1
YIL033C	BCY1		4	6	0	6	6	12		YNL132W	KRE33	1_RiBi
YIL043C	CBR1		4	7	2	9	6	10		YGR234W	YHB1
YIL075C	RPN2		0	5	0	5	0	5		YPR010C	RPA135	1_RiBi
YIL078W	THS1		3	9	0	9	8	13		YLR106C	MDN1
YIL079C	AIR1		0	3	0	3	0	3		YER126C	NSA2	1_RiBi
YIL093C	RSM25		0	3	0	4	2	5		YAL038W	CDC19
YIL133C	RPL16A	2_RPG	3	10	4	10	5	11		YMR229C	RRP5	1_RiBi
YIL142W	CCT2		0	3	0	6	2	5		YHR020W	YHR020W
YJL008C	CCT8		6	10	5	10	9	11		YBR031W	RPL4A	2_RPG
YJL012C	VTC4		3	7	0	8	7	14		YFL002C	SPB4
YJL014W	CCT3		3	3	0	4	2	5		YKL182W	FAS1
YJL034W	KAR2		8	11	5	17	36	54		YPL012W	RRP12	1_RiBi
YJL063C	MRPL8		0	3	0	3	0	3		YLR197W	NOP56	1_RiBi
YJL109C	UTP10	1_RiBi	0	5	0	9	4	16		YGL195W	GCN1
YJL130C	URA2		22	46	20	46	33	55		YLL024C	SSA2	4_HSF1
YJL190C	RPS22A	2_RPG	3	3	3	5	4	5		YGR240C	PFK1
YJL191W	RPS14B	2_RPG	7	10	4	9	14	15		YJL109C	UTP10	1_RiBi
YJL208C	NUC1		3	5	2	7	4	8		YLR153C	ACS2
YJR009C	TDH2		10	12	5	13	13	18		YLL034C	RIX7
YJR016C	ILV3		0	5	0	6	5	6		YER165W	PAB1
YJR045C	SSC1		7	5	7	17	6	20		YGL207W	SPT16
YJR064W	CCT5		2	6	0	4	3	3		YNL061W	NOP2	1_RiBi
YJR068W	RFC2		2	4	0	5	6	8		YBR143C	SUP45
YJR077C	MIR1	3_MSN2	5	6	5	8	8	5		YOR206W	NOC2	1_RiBi
YJR113C	RSM7		0	5	0	4	2	5		YKL212W	SAC1
YJR121W	ATP2	3_MSN2	21	18	19	22	20	28		YBR247C	ENP1	1_RiBi
YJR123W	RPS5	2_RPG	3	7	5	9	4	11		YGL120C	PRP43	1_RiBi
YJR145C	RPS4A	2_RPG	9	23	11	14	16	22		YDL140C	RPO21
YKL029C	MAE1		5	8	2	6	10	14		YPR080W	TEF1
YKL056C	TMA19		4	3	2	3	4	3		YBR127C	VMA2
YKL078W	DHR2	1_RiBi	0	8	0	8	3	9		YDR060W	MAK21	1_RiBi
YKL080W	VMA5		2	4	0	4	0	4		YPL217C	BMS1	1_RiBi
YKL081W	TEF4	1_RiBi	3	7	2	7	5	10		YNL308C	KRI1	1_RiBi
YKL104C	GFA1		3	10	0	9	7	15		YNR053C	NOG2	1_RiBi
YKL106W	AAT1		3	7	0	6	2	9		YER006W	NUG1	1_RiBi
YKL126W	YPK1		0	6	0	4	2	5		YDR545W	YRF1-1
YKL148C	SDH1		3	3	3	7	7	13		YPL146C	NOP53
YKL152C	GPM1		6	8	5	10	11	11		YGR090W	UTP22
YKL156W	RPS27A	2_RPG	4	3	3	3	3	4		YJL034W	KAR2
YKL180W	RPL17A	2_RPG	4	10	4	9	10	13		YMR290C	HAS1	1_RiBi
YKL181W	PRS1	1_RiBi	0	3	0	3	0	6		YPL093W	NOG1	1_RiBi
YKL182W	FAS1		9	18	5	17	16	27		YGR245C	SDA1	1_RiBi
YKL211C	TRP3		0	4	0	3	2	4		YOR204W	DED1
YKL212W	SAC1		4	10	0	14	8	21		YGR296W	YRF1-3
YKR001C	VPS1		11	18	9	19	16	25		YDL171C	GLT1
YKR059W	TIF1	1_RiBi	2	8	2	9	8	11		YJL130C	URA2
YKR092C	SRP40	1_RiBi	0	3	0	4	3	6		YNR016C	ACC1
YLL007C	YLL007C		0	5	0	5	2	5		YPL043W	NOP4	1_RiBi
YLL018C	DPS1	1_RiBi	4	6	0	9	4	11		YBL004W	UTP20	1_RiBi
YLL024C	SSA2	4_HSF1	12	18	12	29	21	32
YLL034C	RIX7		0	7	0	11	0	12
YLL045C	RPL8B	2_RPG	8	14	5	13	17	24
YLR002C	NOC3	1_RiBi	0	8	0	4	3	7
YLR009W	RLP24	1_RiBi	2	4	0	4	0	5
YLR017W	MEU1		2	5	2	6	3	8
YLR029C	RPL15A	2_RPG	3	7	3	6	6	11
YLR044C	PDC1		4	12	8	15	17	21
YLR048W	RPS0B	2_RPG	4	6	4	7	6	7
YLR051C	FCF2	1_RiBi	0	3	0	4	0	7
YLR075W	RPL10	2_RPG	5	12	4	11	15	21
YLR100W	ERG27		3	7	0	5	0	5
YLR106C	MDN1		0	10	0	6	0	11
YLR153C	ACS2		8	13	2	13	13	25
YLR167W	RPS31	2_RPG	4	5	4	5	7	7
YLR175W	CBF5	1_RiBi	2	6	0	9	8	16
YLR180W	SAM1		11	16	6	14	14	21
YLR197W	NOP56	1_RiBi	8	18	6	18	20	31
YLR214W	FRE1		11	12	8	16	22	22
YLR223C	IFH1		0	4	0	3	0	4
YLR249W	YEF3	1_RiBi	10	14	8	17	20	30
YLR259C	HSP60		8	5	3	15	7	15
YLR274W	MCM5		0	4	0	6	0	6
YLR291C	GCD7		2	4	2	5	4	5
YLR305C	STT4		0	6	0	5	3	8
YLR314C	CDC3		3	4	0	10	4	10
YLR325C	RPL38	2_RPG	3	5	3	4	5	5
YLR336C	SGD1	1_RiBi	0	4	0	4	0	6
YLR340W	RPP0	2_RPG	7	7	5	8	11	10
YLR342W	FKS1		12	19	12	25	31	39
YLR344W	RPL26A	2_RPG	6	11	2	8	9	15
YLR355C	ILV5		3	4	3	10	6	8
YLR384C	IKI3		0	3	0	6	0	7
YLR419W	YLR419W		0	3	0	4	3	7
YLR441C	RPS1A	2_RPG	12	30	7	23	30	35
YLR448W	RPL6B	2_RPG	3	7	3	6	7	10
YLR449W	FPR4	1_RiBi	2	4	0	6	2	8
YLR452C	SST2		3	7	0	4	5	5
YML024W	RPS17A	2_RPG	2	6	2	6	7	9
YML048W	GSF2		3	4	2	5	4	8
YML063W	RPS1B	2_RPG	9	23	6	18	23	29
YML072C	TCB3		3	4	0	10	7	14
YML073C	RPL6A	2_RPG	4	11	3	10	10	17
YML074C	FPR3	1_RiBi	0	6	0	7	5	10
YML085C	TUB1		0	4	0	3	2	4
YML086C	ALO1		4	3	0	9	4	10
YML092C	PRE8		0	3	0	3	0	3
YML093W	UTP14	1_RiBi	0	4	0	5	0	3
YML103C	NUP188		0	4	0	4	0	3
YML124C	TUB3		0	3	0	3	0	4
YML125C	PGA3		3	4	2	7	3	7
YMR012W	CLU1		0	5	0	3	0	8
YMR024W	MRPL3		0	3	0	5	3	3
YMR049C	ERB1	1_RiBi	0	13	0	7	4	8
YMR080C	NAM7		2	8	0	8	4	10
YMR083W	ADH3		4	3	3	3	3	5
YMR089C	YTA12		5	6	2	6	5	6
YMR108W	ILV2		11	15	12	15	22	19
YMR109W	MYO5		5	4	2	5	5	7
YMR116C	ASC1	2_RPG	6	10	5	10	10	17
YMR129W	POM152		3	7	0	6	6	15
YMR143W	RPS16A	2_RPG	6	10	3	11	8	15
YMR145C	NDE1		13	12	6	14	12	19
YMR186W	HSC82	4_HSF1	15	15	4	28	17	24
YMR188C	MRPS17		2	5	2	3	4	6
YMR193W	MRPL24		0	7	0	4	6	7
YMR194W	RPL36A	2_RPG	5	6	2	7	8	11
YMR205C	PFK2		7	14	3	13	11	19
YMR229C	RRP5	1_RiBi	0	3	0	9	0	11
YMR241W	YHM2		3	3	0	7	4	9
YMR242C	RPL20A	2_RPG	7	12	4	11	15	18
YMR246W	FAA4		5	9	2	9	8	11
YMR290C	HAS1	1_RiBi	4	15	0	18	4	22
YNL002C	RLP7	1_RiBi	0	6	0	6	0	6
YNL006W	LST8		0	4	0	5	4	5
YNL037C	IDH1		2	6	0	5	6	5
YNL061W	NOP2	1_RiBi	2	8	0	9	0	13
YNL064C	YDJ1	4_HSF1	5	5	6	10	10	16
YNL067W	RPL9B	2_RPG	4	8	3	7	7	12
YNL069C	RPL16B	2_RPG	4	11	3	9	6	12
YNL071W	LAT1	3_MSN2	0	3	0	4	2	3
YNL096C	RPS7B	2_RPG	9	23	9	16	16	19
YNL112W	DBP2	1_RiBi	7	8	2	12	12	17
YNL132W	KRE33	1_RiBi	9	21	2	20	21	31
YNL137C	NAM9		2	5	0	7	8	7
YNL178W	RPS3	2_RPG	10	18	11	16	15	20
YNL182C	IPI3	1_RiBi	3	8	0	8	2	6
YNL209W	SSB2		13	17	13	20	16	24
YNL224C	SQS1		0	4	0	7	0	10
YNL248C	RPA49	1_RiBi	0	4	0	4	5	4
YNL297C	MON2		0	7	0	11	3	12
YNL308C	KRI1	1_RiBi	0	12	0	12	0	16
YNR016C	ACC1		17	29	11	44	32	54
YNR021W	YNR021W		5	4	0	7	5	8
YNR053C	NOG2	1_RiBi	8	18	7	23	15	31
YOL010W	RCL1	1_RiBi	0	4	0	3	0	5
YOL040C	RPS15	2_RPG	0	4	2	4	4	10
YOL080C	REX4		2	8	0	7	6	11
YOL086C	ADH1		7	10	7	12	9	13
YOL090W	MSH2		2	4	0	3	2	7
YOL094C	RFC4		0	6	0	3	4	8
YOL120C	RPL18A	2_RPG	4	8	2	7	5	8
YOL121C	RPS19A	2_RPG	3	4	2	3	4	4
YOL127W	RPL25	2_RPG	3	6	3	7	5	11
YOL152W	FRE7		4	4	2	4	5	6
YOR063W	RPL3	2_RPG	14	20	3	18	23	29
YOR065W	CYT1		2	3	0	4	4	7
YOR086C	TCB1		0	5	0	8	2	12
YOR096W	RPS7A	2_RPG	6	16	5	9	8	12
YOR123C	LEO1		0	4	0	4	0	3
YOR133W	EFT1	1_RiBi	15	24	12	26	29	36
YOR136W	IDH2		0	5	3	5	5	6
YOR145C	PNO1	1_RiBi	2	7	2	7	4	11
YOR151C	RPB2		2	9	0	8	5	11
YOR153W	PDR5		13	9	11	15	28	26
YOR158W	PET123		0	5	0	5	2	6
YOR164C	GET4		0	4	0	4	0	7
YOR167C	RPS28A	2_RPG	2	3	3	3	3	3
YOR204W	DED1		15	18	9	23	23	42
YOR206W	NOC2	1_RiBi	0	8	0	11	0	13
YOR213C	SAS5		0	5	0	4	0	4
YOR217W	RFC1		0	4	0	8	4	7
YOR234C	RPL33B	2_RPG	4	8	3	7	6	9
YOR254C	SEC63		4	6	3	11	6	14
YOR259C	RPT4		2	9	2	5	0	8
YOR270C	VPH1		3	4	2	6	8	11
YOR272W	YTM1	1_RiBi	0	6	0	4	0	6
YOR293W	RPS10A	2_RPG	2	3	0	3	4	4
YOR303W	CPA1		3	3	2	5	4	3
YOR310C	NOP58		6	14	6	14	12	20
YOR317W	FAA1		5	9	0	13	6	12
YOR326W	MYO2		3	8	0	7	8	12
YOR335C	ALA1		6	8	0	5	4	7
YOR341W	RPA190	1_RiBi	9	8	0	15	14	30
YOR361C	PRT1	1_RiBi	0	4	0	9	5	11
YPL004C	LSP1		0	3	0	3	0	3
YPL012W	RRP12	1_RiBi	0	9	0	12	0	11
YPL031C	PHO85		2	3	0	3	3	4
YPL043W	NOP4	1_RiBi	0	16	0	15	3	26
YPL058C	PDR12		7	13	8	11	22	22
YPL063W	TIM50		2	6	0	7	7	14
YPL078C	ATP4		5	4	7	10	7	11
YPL081W	RPS9A	2_RPG	8	14	7	13	12	18
YPL086C	ELP3		0	5	0	3	0	3
YPL090C	RPS6A	2_RPG	6	24	5	14	12	20
YPL093W	NOG1	1_RiBi	3	21	0	19	4	22
YPL106C	SSE1		2	4	2	8	3	7
YPL118W	MRP51		0	3	0	4	2	5
YPL124W	SPC29		4	5	0	4	4	4
YPL126W	NAN1	1_RiBi	0	4	0	7	0	10
YPL131W	RPL5	2_RPG	4	9	4	10	7	14
YPL143W	RPL33A	2_RPG	5	10	5	9	8	11
YPL146C	NOP53		0	7	0	6	0	17
YPL198W	RPL7B	2_RPG	6	13	2	14	12	16
YPL204W	HRR25		0	4	0	3	0	4
YPL210C	SRP72		0	6	0	7	4	10
YPL215W	CBP3		4	3	0	5	3	6
YPL217C	BMS1	1_RiBi	0	14	0	16	5	20
YPL220W	RPL1A	2_RPG	5	8	4	7	6	12
YPL226W	NEW1		7	17	0	14	11	19
YPL231W	FAS2		4	5	2	11	11	16
YPL235W	RVB2		0	10	0	8	4	12
YPL240C	HSP82	4_HSF1	7	8	2	13	9	10
YPL243W	SRP68		2	3	0	4	0	6
YPL249C-A	RPL36B	2_RPG	6	8	3	9	12	15
YPL266W	DIM1	1_RiBi	0	5	0	3	0	5
YPR010C	RPA135	1_RiBi	3	8	0	6	9	20
YPR020W	ATP20		3	3	0	3	3	4
YPR024W	YME1		4	5	0	5	4	7
YPR043W	RPL43A	2_RPG	0	4	0	4	0	6
YPR080W	TEF1		8	13	9	14	13	28
YPR088C	SRP54		6	6	3	9	4	11
YPR102C	RPL11A	2_RPG	4	8	4	5	7	8
YPR110C	RPC40	1_RiBi	5	5	4	8	5	13
YPR111W	DBF20		2	5	0	6	4	7
YPR133C	SPN1		2	7	0	6	5	8
YPR149W	NCE102		2	3	2	3	3	3
YPR181C	SEC23		0	3	0	6	3	6
YPR183W	DPM1		0	4	0	6	2	3
YPR191W	QCR2		6	9	4	12	7	9
YAL038W	CDC19		13	22	14	22	22	33
