# Supplementary material for: A ribosome assembly stress response regulates transcription to maintain proteome homeostasis
Source: eLife. 2019 May 24;8:e45002. doi: 10.7554/eLife.45002 (PMC6579557; doi:10.7554/eLife.45002)
Supplement: Supplementary file 4. [file elife-45002-supp4.xlsx]

## Sheet: Feuil1
Supplementary File 4
Rpb1 ChIP-seq in Top1-AID Ifh1-FRB or Top1-AID Top2-AID Ifh1-FRB cells following either auxin, auxin plus rapamycin, or rapamycin addition to the media. Category (cat): Hsf1 genes (Hsf1), Ribosome Biogenesis genes (RiBi), Msn2 genes (Msn2), Ribosomal Protein genes (RPG) Postion of each ORF in the chromosome is indicated (Chr, Start, End).
name	#chr	start	end	cat	Ifh1-FRB 60min Veh	Ifh1-FRB 60min Rap	Ifh1-FRB 60min Veh	Ifh1-FRB 60min Rap	Top1-2-AID Ifh1-FRB 60min Veh	Top1-2-AID Ifh1-FRB 60min Aux	Top1-2-AID Ifh1-FRB 60min Aux Rap	Top1-AID Ifh1-FRB 60min Veh	Top1-AID Ifh1-FRB 60min Aux	Top1-AID Ifh1-FRB 60min Aux Rap	name
YAL068C	chrI	1788	2191		0.730074	0.740645	0.295955	0.43603	0.282333	1.04782	0.98201	0.213275	0.546749	0.40206	YAL068C
YAL064C-A	chrI	11698	14645		33.1277	38.2645	17.7131	20.543	16.3835	30.147	30.2988	15.6847	18.3809	20.297	YAL064C-A
YAL064W	chrI	21341	21981		8.04742	10.9736	2.94653	4.62688	3.14863	9.04945	7.72427	3.16433	5.02469	4.60072	YAL064W
YAL063C	chrI	23940	28043		17.6299	21.0223	10.1185	11.3549	9.84671	16.5184	16.3239	9.46672	11.1491	11.3603	YAL063C
YAL062W	chrI	31187	33041		34.3878	45.7	18.1391	24.5859	25.0393	28.8861	30.5961	23.1694	21.9585	29.0733	YAL062W
YAL061W	chrI	33222	34864		56.3929	70.6293	22.1538	25.1891	34.483	47.6436	43.4867	30.4	33.3354	37.2133	YAL061W
YAL060W	chrI	35056	36421		119.534	127.982	55.679	56.4556	57.8734	77.2766	69.8444	56.5148	67.2594	62.954	YAL060W
YAL059W	chrI	36508	37275		108.618	108.912	70.9428	77.9417	53.9243	66.2584	61.6809	60.8353	67.8697	65.2904	YAL059W
YAL058W	chrI	37379	39106		28.6076	30.8719	13.2922	16.5218	14.4118	17.952	18.6485	14.5681	15.9702	16.2411	YAL058W
YAL056W	chrI	39204	42030		51.5559	55.0483	26.3614	27.6925	24.1694	34.6474	35.6461	24.8004	26.6722	27.85	YAL056W
YAL055W	chrI	42154	42862		25.6753	32.9522	12.6047	14.3369	13.9685	20.2602	18.8675	14.0209	15.3916	16.5195	YAL055W
YAL053W	chrI	45743	48316		79.0456	107.126	35.3699	52.3329	30.7546	43.1263	50.6452	32.0245	31.5819	45.5633	YAL053W
YAL051W	chrI	48538	51858		38.7573	37.8368	21.1314	20.1095	18.1219	22.8018	22.6003	19.3551	19.6401	19.7143	YAL051W
YAL049C	chrI	51739	52660		53.86	61.8932	24.1776	27.6626	25.8409	34.6629	35.0086	27.8915	28.3333	30.5692	YAL049C
YAL048C	chrI	52729	54798		34.2222	36.7108	15.9483	18.5464	16.9761	21.5181	21.6629	16.5252	16.9197	20.3881	YAL048C
YAL047C	chrI	54925	56885		26.8251	26.5001	12.9148	14.9066	12.0274	14.0427	15.0965	12.3886	12.7277	13.6331	YAL047C
YAL046C	chrI	56919	57390		48.384	52.1949	18.4316	23.2968	29.0103	32.5718	34.5814	26.9237	27.2334	30.5726	YAL046C
YAL044W-A	chrI	57480	57963		46.6148	52.4126	17.5596	23.7607	24.447	31.5822	32.4074	23.2342	26.0154	30.3608	YAL044W-A
YAL044C	chrI	57867	58475		80.1534	111.149	30.7446	41.6795	42.8491	52.968	49.5009	36.3086	44.0297	52.0489	YAL044C
YAL043C	chrI	58632	61092		63.8344	70.7034	30.7956	34.274	35.2464	46.3288	42.183	32.9806	33.0884	33.196	YAL043C
YAL042W	chrI	61268	62656		69.9797	71.7581	33.7416	36.2361	40.7398	54.1866	47.4304	35.7937	37.1361	34.2128	YAL042W
YAL041W	chrI	62775	65464		72.434	69.1985	34.2793	33.4779	33.5421	52.3417	43.974	35.417	35.8986	32.7403	YAL041W
YAL040C	chrI	65381	67849		224.764	238.057	118.256	120.485	114.157	99.4246	114.632	113.702	99.8285	114.544	YAL040C
YAL039C	chrI	68648	69599		78.757	104.802	40.505	52.9898	51.1133	73.5143	61.1366	43.3601	48.9393	54.3283	YAL039C
YAL038W	chrI	71643	73454		1194.65	1332.71	678.542	758.064	704.209	441.884	504.26	611.654	640.907	666.253	YAL038W
YAL037W	chrI	73838	74859		18.1237	19.0994	9.59833	10.01	7.69112	18.4552	12.9067	8.76105	9.16412	9.18855	YAL037W
YAL036C	chrI	74852	76198		101.021	89.5449	60.3973	58.7384	53.841	59.0527	50.7121	55.6842	52.739	48.3587	YAL036C
YAL035W	chrI	76400	79562	1_RiBi	191.248	208.07	132.263	144.84	95.8161	114.361	119.143	101.602	100.182	103.3	YAL035W
YAL034W-A	chrI	79673	80669		48.9353	57.4905	25.3178	28.8587	24.0682	27.4346	28.149	24.3922	24.9252	26.7681	YAL034W-A
YAL034C	chrI	80566	82584	3_MSN2	44.5259	56.2244	20.5247	23.5225	23.5134	28.2265	32.7515	22.8066	22.3237	26.9751	YAL034C
YAL033W	chrI	82684	83301		66.7911	73.9384	30.6495	34.442	37.3194	35.7052	34.5794	32.9256	34.4677	36.2639	YAL033W
YAL032C	chrI	83276	84506		52.7453	59.9903	26.7081	30.1675	29.2902	35.0885	31.8212	27.6781	28.9229	28.945	YAL032C
YAL031C	chrI	84639	87077		36.5727	40.1193	17.5279	19.2839	18.5397	23.33	23.6858	18.5262	20.1998	19.5325	YAL031C
YAL030W	chrI	87249	87857		43.5378	45.1713	17.3052	16.7883	25.1096	33.1848	32.8041	21.3495	25.3839	26.2011	YAL030W
YAL029C	chrI	87756	92523		72.2194	74.4914	37.8094	42.6964	30.0025	40.8531	43.1471	34.1547	35.2919	35.0689	YAL029C
YAL028W	chrI	92848	94539		20.4332	28.1166	8.7817	10.2953	10.125	15.355	16.5724	9.98746	10.3382	12.4149	YAL028W
YAL027W	chrI	94606	95579		40.3919	43.5084	18.3016	22.131	20.5621	22.8476	24.0501	21.8675	21.9593	23.5871	YAL027W
YAL026C	chrI	95481	99782		33.9991	35.0143	16.2012	17.3944	15.4327	19.1362	19.7218	16.2756	16.6365	17.0029	YAL026C
YAL025C	chrI	100037	101173	1_RiBi	182.185	194.369	150.336	171.812	92.9257	95.1847	98.6918	97.766	101.631	106.988	YAL025C
YAL024C	chrI	101279	105965		41.292	44.6243	19.4512	21.6417	18.0248	16.7467	18.9661	19.9962	19.2614	19.9301	YAL024C
YAL023C	chrI	106141	108695		117.157	139.034	62.2571	73.5896	66.8319	68.1396	76.7427	64.3476	65.8247	69.9178	YAL023C
YAL022C	chrI	108876	110462		38.777	46.5278	17.7551	23.3215	20.6851	17.0375	19.0098	19.4468	17.5932	22.8013	YAL022C
YAL021C	chrI	110631	113419		59.8369	65.1242	30.0381	34.2417	31.7503	32.1644	33.13	29.4195	29.2304	31.3431	YAL021C
YAL020C	chrI	113535	114629		39.4117	40.1832	20.7898	22.2172	28.4416	26.8592	23.5288	23.8761	21.9123	22.9686	YAL020C
YAL019W	chrI	114808	118365		65.2871	69.5798	41.5815	44.9504	29.9722	30.6465	31.5653	32.878	32.6069	32.6853	YAL019W
YAL017W	chrI	119857	124484		29.0352	37.3313	13.0575	14.4139	14.5344	18.9358	23.0475	14.5411	16.9334	19.7968	YAL017W
YAL016W	chrI	124781	126856		93.3728	97.3136	46.1163	51.3595	45.9684	50.3233	51.9003	44.4564	47.3481	46.8553	YAL016W
YAL015C	chrI	126769	128102		36.0169	43.2747	15.2229	18.7377	18.401	19.6277	21.3887	17.66	18.2196	19.944	YAL015C
YAL014C	chrI	128086	129071		71.0116	82.5261	38.145	40.6545	38.997	42.4651	40.5138	37.1165	37.6613	40.3352	YAL014C
YAL013W	chrI	129209	130589		70.7272	86.5588	38.1682	46.2336	41.2802	44.5195	43.3144	36.0269	35.0472	38.9796	YAL013W
YAL012W	chrI	130734	132084		231.194	244.846	112.475	125.497	145.056	139.174	113.433	124.832	119.818	121.847	YAL012W
YAL011W	chrI	132184	134174		48.7678	51.3081	27.0722	29.9483	22.6441	31.2104	32.3917	24.7993	28.048	25.7887	YAL011W
YAL010C	chrI	134086	135705		39.7686	44.9173	19.3753	21.9287	17.9015	21.5878	23.274	19.5514	20.1348	22.0543	YAL010C
YAL009W	chrI	135828	136758		39.693	46.45	18.0618	23.1358	21.575	25.4204	29.0006	21.4994	24.8197	30.3802	YAL009W
YAL008W	chrI	136834	137644		26.9208	39.4086	13.8514	15.887	16.384	22.6164	25.7254	16.539	18.3142	20.4317	YAL008W
YAL007C	chrI	137546	138452		86.0099	99.256	46.6002	48.4863	48.7563	45.6002	54.3915	47.9389	49.1947	52.8457	YAL007C
YAL005C	chrI	139355	141660	4_HSF1	628.224	503.234	244.727	149.951	427.429	411.662	539.211	291.405	565.765	272.634	YAL005C
YAL003W	chrI	142116	143370	1_RiBi	1131.04	1138.43	629.515	617.615	572.072	397.755	459.003	548.499	572.58	554.144	YAL003W
YAL002W	chrI	143615	147587		31.3288	35.471	13.522	14.1675	14.5431	13.3737	16.8201	15.3701	14.5947	16.8305	YAL002W
YAL001C	chrI	147560	151202		42.0078	47.4383	21.4557	24.0675	19.6878	18.8556	22.6863	20.3931	21.2383	24.3667	YAL001C
YAR002W	chrI	152214	153976		84.9145	91.4747	43.8262	47.5386	37.5535	49.8272	46.4227	40.5091	43.0071	46.1634	YAR002W
YAR002C-A	chrI	153932	154827		99.6474	109.998	49.2561	54.5924	53.2928	50.576	52.3395	51.3908	55.6777	58.1327	YAR002C-A
YAR003W	chrI	154919	156781		50.295	56.2648	21.3659	25.7943	23.5773	32.7753	31.1189	23.5376	26.7393	26.9883	YAR003W
YAR007C	chrI	156679	158688		66.0922	72.7393	32.7547	34.4881	32.118	45.5826	39.5101	32.6012	35.2298	32.422	YAR007C
YAR008W	chrI	158846	159881		54.116	58.0797	31.335	31.8066	29.704	33.1067	28.187	27.8807	27.8943	28.6723	YAR008W
YAR014C	chrI	166567	169020		71.4156	75.26	39.91	45.0444	31.9408	38.5574	39.3677	32.9376	34.5246	35.5135	YAR014C
YAR015W	chrI	169223	170392		50.1157	59.3151	25.425	32.8692	21.1658	26.2832	25.4016	23.1752	25.2788	29.1469	YAR015W
YAR018C	chrI	170262	171737		50.172	60.4139	25.7261	29.5263	23.6961	21.3386	28.2173	26.1156	24.1553	31.495	YAR018C
YAR019C	chrI	172135	175167		28.0674	34.7129	13.0549	15.043	12.728	14.4057	16.9938	13.6884	14.3059	16.085	YAR019C
YAR020C	chrI	176662	177189		12.4327	14.8905	4.97683	6.69869	6.17935	9.06613	9.64216	6.80061	6.77571	7.11283	YAR020C
YAR027W	chrI	183698	184655		54.6948	71.3874	23.4032	28.3825	25.4696	27.2039	34.7552	23.9101	26.6455	34.3638	YAR027W
YAR028W	chrI	184812	185793		33.7086	48.0228	15.5365	21.0366	17.1593	17.4524	21.4747	15.3413	17.2251	21.5124	YAR028W
YAR033W	chrI	188048	188963		35.1539	36.5637	16.8941	18.1426	18.6331	21.5031	20.5006	17.7883	19.4903	20.6321	YAR033W
YAR035W	chrI	190138	192572		8.10328	9.10246	3.61494	3.97318	5.1663	5.04641	4.11683	3.59605	3.56069	3.43501	YAR035W
YAR042W	chrI	192564	196350		57.7269	61.9578	30.4882	33.9691	28.3282	29.0507	29.7647	27.778	27.9637	30.4187	YAR042W
YAR050W	chrI	203375	208127		17.7612	21.4529	9.92462	11.8939	9.66076	14.5989	14.764	9.03531	10.6285	10.9136	YAR050W
YAR071W	chrI	225158	226914		41.0953	56.4995	10.6838	12.6224	13.5705	18.9161	16.9868	13.1538	13.6719	16.1182	YAR071W
YBL108C-A	chrII	7622	7982		0.356528	0.20875	0.0472222	0.114222	0.0384722	0.267056	0.0773611	0.0617778	0.0790556	0.150806	YBL108C-A
YBL107C	chrII	9818	10551		72.7409	76.1461	36.9775	42.0417	36.9986	36.3701	34.7296	37.3999	38.7383	38.8349	YBL107C
YBL106C	chrII	10719	13945		24.5795	24.8712	9.42672	10.448	9.64667	20.3387	20.5044	10.0033	14.312	12.0825	YBL106C
YBL105C	chrII	13988	17964		64.3139	64.6813	32.6979	33.4779	26.998	32.0763	33.7342	30.0376	30.3907	30.9186	YBL105C
YBL104C	chrII	18146	21315		42.352	42.2886	21.2817	22.0159	18.8481	20.227	20.8763	20.3235	20.2137	20.0692	YBL104C
YBL103C	chrII	21619	23801		51.2174	50.4955	25.7488	26.5494	22.3268	24.4863	25.9618	23.4016	23.8512	23.8872	YBL103C
YBL102W	chrII	23979	24894		56.3396	62.79	23.0879	24.9586	29.1913	33.3409	34.5274	27.4641	30.9045	32.516	YBL102W
YBL101C	chrII	24779	28605		37.4143	44.0631	15.2362	17.3353	16.0906	24.6595	23.6593	17.0181	19.7634	21.2468	YBL101C
YBL099W	chrII	36735	38964	3_MSN2	139.988	156.104	73.1999	81.2866	101.283	91.5595	109.318	86.1589	94.1047	99.7266	YBL099W
YBL098W	chrII	39114	40626		17.1629	20.1505	7.59688	9.70394	8.90213	9.52733	9.4778	8.82557	8.43458	10.7758	YBL098W
YBL097W	chrII	40772	43100		65.4231	64.4171	33.489	33.9907	29.125	31.3088	32.4322	32.2527	30.7004	31.0956	YBL097W
YBL095W	chrII	43260	44209		60.4623	65.193	25.7037	25.3218	32.3334	37.2873	35.6459	30.2332	29.8285	31.2828	YBL095W
YBL093C	chrII	44105	45016		61.9864	60.2808	29.9374	29.5359	32.4759	39.7815	34.9153	31.6699	29.8009	30.2654	YBL093C
YBL092W	chrII	45514	46440	2_RPG	995.663	381.232	604.162	244.234	529.239	152.47	101.417	506.176	318.977	185.771	YBL092W
YBL091C-A	chrII	46494	47192		93.6928	56.5455	45.0193	27.3206	53.8542	32.4799	28.7238	55.8806	36.4516	34.6156	YBL091C-A
YBL091C	chrII	47272	48694		49.2933	56.681	28.2662	29.5807	28.1668	36.1482	32.2323	28.2091	27.2124	28.6217	YBL091C
YBL090W	chrII	48793	49478		85.7738	81.6355	38.348	39.5828	43.7552	40.7847	43.4367	43.2152	46.3024	45.2238	YBL090W
YBL089W	chrII	49557	51025		40.6639	44.3257	15.4855	16.331	20.4001	22.6929	22.5498	19.9312	19.883	21.778	YBL089W
YBL088C	chrII	50930	59654		32.8597	31.0489	15.1683	13.8663	14.108	13.5833	15.0931	15.6716	14.929	14.8804	YBL088C
YBL087C	chrII	59721	60821	2_RPG	427.447	183.175	261.126	109.642	239.343	97.9566	77.8358	243.316	145.74	98.3746	YBL087C
YBL086C	chrII	61159	62682		36.6574	44.1987	15.9375	15.9664	19.3538	31.822	30.5278	17.9887	20.8118	19.8855	YBL086C
YBL085W	chrII	63684	66936		63.9668	65.066	30.6219	31.2033	28.2334	28.7206	30.0948	28.3759	29.6368	30.3751	YBL085W
YBL084C	chrII	67042	69568		47.2852	48.1302	20.963	22.0215	19.7217	25.7138	25.4667	21.1343	24.1607	24.4021	YBL084C
YBL082C	chrII	69657	71172		41.8497	39.0483	19.8838	19.6085	19.3894	21.7124	19.9323	18.1598	18.6408	18.4589	YBL082C
YBL081W	chrII	71551	73031		119.792	118.961	65.1068	67.3196	50.3692	47.0698	46.3551	48.5454	49.2474	49.039	YBL081W
YBL080C	chrII	72984	74710		28.119	30.6271	12.1961	14.3721	13.0116	17.6503	16.4783	13.2189	14.1645	15.1283	YBL080C
YBL079W	chrII	75195	80047		78.3479	74.1115	40.1902	40.2892	32.8286	39.8751	41.2389	36.864	38.4521	35.9054	YBL079W
YBL078C	chrII	79893	80790		33.0162	43.2144	12.5932	16.5734	14.2279	19.1049	24.0867	15.5581	18.2975	21.4958	YBL078C
YBL076C	chrII	80951	84306	1_RiBi	200.487	173.167	114.106	100.98	90.2941	89.1184	84.806	98.8704	92.5323	85.616	YBL076C
YBL072C	chrII	88414	89500	2_RPG	757.566	317.961	435.818	175.84	399.693	151.762	105.545	392.22	238.114	150.315	YBL072C
YBL071W-A	chrII	89942	90474		132.819	107.481	65.771	59.4261	70.7702	55.9536	56.5287	76.0397	61.7484	59.0701	YBL071W-A
YBL069W	chrII	90630	92172		55.4942	52.5345	26.6177	26.4576	25.8924	25.4092	22.7346	27.6972	23.2489	25.2058	YBL069W
YBL068W	chrII	92335	93524		64.1575	57.0477	36.7788	36.5107	31.1337	29.6874	28.4261	33.4491	31.7594	31.0342	YBL068W
YBL067C	chrII	93550	96168		49.9469	48.2337	26.1927	26.7294	20.5034	35.4146	29.3691	23.8099	24.8506	22.5805	YBL067C
YBL066C	chrII	96338	100155		51.3351	54.5725	26.4456	29.6253	26.5172	33.3173	34.8242	26.5226	28.7546	29.5103	YBL066C
YBL064C	chrII	100298	101223		38.2702	54.3814	15.6513	18.7623	27.5079	45.0752	48.1401	25.368	31.1103	34.3685	YBL064C
YBL063W	chrII	101868	105325		31.2959	33.0782	13.704	15.621	13.5597	19.2483	18.5273	14.4653	15.741	15.3534	YBL063W
YBL061C	chrII	105211	107505		85.1933	105.87	41.2494	53.1731	35.7959	41.2633	47.8752	38.6991	40.2466	46.0794	YBL061C
YBL060W	chrII	107894	110041		44.6203	47.6314	22.6108	24.7316	18.5019	27.9748	27.1753	19.2893	22.0723	22.1287	YBL060W
YBL059C-A	chrII	109880	110570		61.0349	60.6509	29.218	30.766	31.9802	37.0337	39.7554	33.6645	33.0658	40.0256	YBL059C-A
YBL059W	chrII	110593	111357		57.0103	63.5348	29.0451	28.1806	36.6344	42.5094	39.6746	36.7645	39.3352	38.0818	YBL059W
YBL058W	chrII	111395	112826		84.3883	84.9385	42.5934	40.1608	44.939	68.9474	57.4943	42.0447	52.7076	41.9944	YBL058W
YBL057C	chrII	112728	113457		57.5034	60.8344	27.1241	30.1476	32.6442	44.4675	36.6898	32.5308	31.3123	33.3963	YBL057C
YBL056W	chrII	113625	115562		108.325	120.321	56.7717	60.0148	55.4776	74.6933	77.2316	56.6182	68.0862	63.9188	YBL056W
YBL055C	chrII	115476	116829		56.5714	55.1832	28.6201	33.1617	26.3363	45.0982	38.7733	28.1495	30.2599	30.1201	YBL055C
YBL054W	chrII	117473	119361		89.2333	77.6156	60.7256	65.8557	38.1839	48.1904	38.8806	44.4827	41.3981	39.4094	YBL054W
YBL052C	chrII	119304	122140		44.1173	42.5002	22.0427	22.7015	18.2647	19.4954	20.6543	20.3677	21.8838	20.355	YBL052C
YBL051C	chrII	122305	124843		80.0373	85.1502	43.6496	45.6095	36.7961	48.5221	51.2599	38.5443	40.725	41.057	YBL051C
YBL050W	chrII	125037	126182		68.2204	74.6031	28.32	29.8868	31.9443	42.644	43.3276	30.2397	35.4301	36.6371	YBL050W
YBL047C	chrII	127685	132205		75.9876	97.7035	35.9005	42.9046	37.0227	51.2377	60.1794	39.0077	42.4823	48.3432	YBL047C
YBL046W	chrII	132402	134043		52.9982	57.9411	32.0664	34.3885	25.6037	32.108	30.7454	26.6028	26.3661	26.1452	YBL046W
YBL045C	chrII	133813	135701		91.353	100.588	45.7196	52.2419	63.656	72.0317	72.9913	59.3367	64.8554	68.2666	YBL045C
YBL043W	chrII	136488	137611		8.82314	12.2233	6.75272	9.24582	8.57988	10.2312	12.0038	7.73546	9.06781	11.1935	YBL043W
YBL042C	chrII	138076	140348	1_RiBi	150.654	141.612	78.3784	85.6666	63.6007	62.5152	57.0554	70.0055	66.4305	61.8607	YBL042C
YBL041W	chrII	141032	142020		163.035	155.139	79.9628	70.348	86.9327	115.495	93.1581	82.8703	96.4093	80.5415	YBL041W
YBL040C	chrII	142112	142910		110.812	126.564	54.7436	59.4636	59.822	71.087	69.2874	60.6727	62.7318	66.6418	YBL040C
YBL039W-B	chrII	143085	143726		29.6793	30.5358	12.9251	14.0127	16.3905	23.0784	19.8746	16.1846	17.0633	20.6595	YBL039W-B
YBL039C	chrII	143882	145817	1_RiBi	169.751	157.139	116.685	121.438	84.5034	96.6349	82.0013	94.4584	91.6102	87.9865	YBL039C
YBL038W	chrII	146097	146979		97.7743	108.744	46.2602	52.1403	50.9111	55.635	56.0935	50.1651	54.4014	56.0503	YBL038W
YBL037W	chrII	147110	150427		35.567	40.981	14.9215	16.4237	14.0376	22.3984	21.3728	15.6456	18.3524	18.0627	YBL037W
YBL036C	chrII	150299	151268		84.7434	84.0405	45.2913	48.2741	38.0162	47.3161	43.7422	40.7135	43.104	43.2433	YBL036C
YBL035C	chrII	151409	153702		63.3444	66.3759	33.7643	34.4077	29.0396	35.7946	35.0412	30.0593	30.5135	30.3745	YBL035C
YBL034C	chrII	153847	158450		38.9933	43.7781	20.2946	22.0388	18.0315	22.9911	23.0021	19.5126	19.7672	20.7846	YBL034C
YBL033C	chrII	158539	159720		75.4042	88.9975	37.3011	39.6472	44.2574	49.8627	42.6741	40.2812	42.8233	41.6083	YBL033C
YBL032W	chrII	160085	161524		64.7035	69.3393	26.4498	31.0766	29.4902	37.3908	35.2562	28.2046	29.8378	31.5482	YBL032W
YBL031W	chrII	161660	162861		49.5272	54.73	23.4265	25.3199	24.6423	29.501	26.3664	26.3028	26.9323	25.5624	YBL031W
YBL030C	chrII	162739	164144		235.531	247.733	123.59	121.087	165.992	167.939	160.867	144.994	152.776	152.7	YBL030C
YBL029C-A	chrII	164346	164890		66.2779	78.6402	26.8731	35.6826	52.2251	67.2243	64.0193	49.2472	53.0985	60.6582	YBL029C-A
YBL029W	chrII	166065	167470		58.7583	60.2813	34.5004	34.6519	30.8113	42.0144	34.6105	33.323	36.6727	38.3451	YBL029W
YBL028C	chrII	167233	167895		171.827	152.161	108.23	108.558	78.2332	66.3005	68.8356	86.2182	82.7488	84.7393	YBL028C
YBL027W	chrII	168391	169467	2_RPG	616.418	233.316	412.469	148.369	342.421	103.974	71.7594	345.176	188.11	108.475	YBL027W
YBL026W	chrII	170551	171166		136.509	140.825	63.6916	66.9273	64.1158	55.4879	65.075	65.342	72.4853	73.6062	YBL026W
YBL025W	chrII	171412	172208		53.4397	54.4342	26.5305	26.4788	30.4255	29.1359	25.9622	29.3248	28.0501	30.3177	YBL025W
YBL024W	chrII	172471	174664		124.027	116.435	72.4741	72.7938	54.1706	52.1063	54.5993	59.4199	59.3414	57.0213	YBL024W
YBL023C	chrII	174707	177578		42.4119	49.6805	24.2953	28.2335	20.8937	29.2425	27.3402	22.0119	23.144	25.8953	YBL023C
YBL022C	chrII	177796	181407		76.0439	72.1442	37.344	34.8606	35.9182	47.8333	40.4821	36.6677	42.5294	33.7321	YBL022C
YBL021C	chrII	181488	182125		64.0646	59.8166	29.4537	30.769	40.0655	43.535	35.3071	37.0608	37.2174	35.2496	YBL021C
YBL020W	chrII	182328	184225		47.7675	43.8907	22.7387	22.029	22.1324	25.2794	23.0516	23.1875	23.4172	21.271	YBL020W
YBL019W	chrII	184300	185960		35.3785	39.8183	17.1874	18.1279	15.881	20.1451	21.2799	17.4147	19.5669	21.0206	YBL019W
YBL018C	chrII	185932	186528		76.7132	68.6223	38.7704	38.852	36.6322	33.9361	31.0728	39.5559	39.6265	40.1439	YBL018C
YBL017C	chrII	186772	191787		67.6797	68.7838	32.837	33.8502	28.9257	29.1569	31.5201	31.5333	31.1403	32.6211	YBL017C
YBL016W	chrII	192360	193648		59.5517	60.9621	29.4862	34.8556	28.737	27.2576	29.3093	28.4857	28.5911	34.1803	YBL016W
YBL015W	chrII	194018	195976	3_MSN2	24.5395	29.0381	11.0147	13.2564	14.767	17.0177	15.9319	12.2363	13.6019	16.6189	YBL015W
YBL014C	chrII	198952	201776		65.5115	62.7567	36.8286	40.985	28.2265	31.2268	28.7862	30.9574	32.2023	29.1812	YBL014C
YBL011W	chrII	203436	206020		62.4748	63.7092	27.2518	28.8999	28.0471	38.9783	33.0305	28.7635	31.7527	28.6087	YBL011W
YBL010C	chrII	205930	206983		62.9438	64.9158	31.9867	32.0405	30.6591	31.2529	29.2095	30.4283	34.0594	32.106	YBL010C
YBL009W	chrII	207159	209352		61.813	60.5625	30.7254	32.3704	27.1062	24.2282	24.2958	29.8566	29.8158	28.2194	YBL009W
YBL008W	chrII	209496	212270		28.6019	28.4094	13.4807	14.2194	13.2529	13.3707	13.1316	13.3596	13.517	13.0763	YBL008W
YBL007C	chrII	212546	216420		73.4032	87.7018	36.1092	41.351	37.0864	39.1099	42.0403	37.4674	37.7624	41.0926	YBL007C
YBL006C	chrII	216412	217159		112.835	122.941	50.7547	58.187	67.8118	59.8865	58.8033	63.7216	60.5455	68.0285	YBL006C
YBL005W	chrII	217398	220591		93.067	93.2876	39.1759	39.9644	41.5098	54.8597	52.7339	44.7202	56.1032	44.4439	YBL005W
YBL004W	chrII	227528	235177	1_RiBi	105.433	100.018	63.319	68.7604	43.0464	35.5353	39.8492	49.845	47.112	46.05	YBL004W
YBL003C	chrII	235219	235855		683.441	722.989	356.168	371.958	470.582	189.415	200.951	422.896	441.622	445.846	YBL003C
YBL002W	chrII	236363	237145		649.391	706.867	394.584	402.753	435.149	154.53	176.963	409.657	378.272	401.685	YBL002W
YBL001C	chrII	237086	237572		100.317	122.379	45.2724	49.8358	63.8466	42.1681	49.6758	62.1717	56.5391	72.0221	YBL001C
YBR001C	chrII	238763	241446		38.7073	46.0101	16.4966	18.8826	18.7959	25.6361	27.3157	18.0094	22.7722	24.9523	YBR001C
YBR002C	chrII	241592	242601		129.278	144.232	77.4025	86.0386	73.9773	86.9343	89.3003	76.172	82.2087	84.0409	YBR002C
YBR003W	chrII	242774	244351		40.7828	49.4931	17.4697	17.336	20.7458	32.6102	31.0948	20.3838	22.2661	25.9694	YBR003W
YBR004C	chrII	244272	245682		70.5095	80.2816	35.5276	43.2703	31.0161	32.5573	39.2703	34.63	36.7365	42.2155	YBR004C
YBR005W	chrII	245816	246693		52.6051	69.7202	25.452	36.0663	30.6313	36.4421	42.4211	29.6493	32.5414	41.934	YBR005W
YBR006W	chrII	246878	248646		38.8699	47.9589	19.0638	24.4997	21.4774	31.4159	32.1328	20.5317	24.94	26.4442	YBR006W
YBR007C	chrII	248676	251161		61.6219	73.928	29.9551	36.4509	29.3212	41.2985	43.0758	29.6692	35.0262	37.6499	YBR007C
YBR009C	chrII	255207	255781		922.013	1057.71	543.989	548.945	632.421	254.05	301.777	517.119	660.991	645.282	YBR009C
YBR010W	chrII	256302	256903		902.503	983.921	481.168	497.012	604.348	284.059	329.568	490.502	634.368	619.918	YBR010W
YBR011C	chrII	256998	258041		191.262	190.356	113.216	105.081	114.931	113.545	100.17	111.861	113.729	105.806	YBR011C
YBR013C	chrII	265157	266235		0.277894	0.218618	0.0758071	0.0914286	0.0578942	0.167755	0.0851855	0.120056	0.0683581	0.084666	YBR013C
YBR014C	chrII	266617	267418		57.9705	60.9634	27.7976	28.8137	29.7658	28.8913	30.7669	30.8162	32.5939	36.5344	YBR014C
YBR015C	chrII	267575	269595		89.3176	96.8222	41.9323	44.1311	41.3236	44.3844	44.6358	41.3028	41.0058	46.9691	YBR015C
YBR016W	chrII	270209	270841		87.7486	95.7834	39.1815	44.278	52.5114	65.5259	60.1744	44.6186	52.7754	50.8478	YBR016W
YBR017C	chrII	270843	273769		73.5275	80.8557	41.3176	46.4144	33.8033	42.2349	44.8959	35.9632	39.0762	41.8508	YBR017C
YBR021W	chrII	281306	283509	1_RiBi	74.8531	92.4192	44.161	52.7986	38.7799	35.2268	42.0412	42.1305	40.2058	46.882	YBR021W
YBR022W	chrII	283660	284421		63.7672	78.0937	28.0697	30.6187	32.8093	34.251	38.0886	31.8417	34.2667	39.4179	YBR022W
YBR023C	chrII	284277	288068		98.5855	117.06	46.8534	60.4003	39.5498	46.981	52.9356	41.4573	40.0543	48.9581	YBR023C
YBR024W	chrII	289327	290567		59.3136	57.754	24.8946	24.6063	27.5419	39.5227	30.8866	27.3956	30.6397	28.9128	YBR024W
YBR025C	chrII	290475	292038		287.734	234.404	146.34	107.456	150.278	181.884	143.445	153.318	159.587	129.241	YBR025C
YBR026C	chrII	292760	294086		33.529	37.6437	14.2065	12.6843	19.325	24.01	24.6675	17.07	19.2999	21.639	YBR026C
YBR028C	chrII	294280	296101		49.5676	54.6041	25.0247	26.3307	24.161	26.9217	27.8419	24.9593	27.1156	27.8971	YBR028C
YBR029C	chrII	296295	297821		100.23	105.286	47.4112	55.282	47.199	54.5342	54.4387	48.9566	49.7904	50.8126	YBR029C
YBR030W	chrII	298208	300063		79.2925	85.7271	46.34	50.9914	42.9981	43.5259	41.6697	46.3459	42.1037	45.606	YBR030W
YBR031W	chrII	300141	301349	2_RPG	617.473	617.812	338.027	367.286	367.834	260.259	294.113	322.018	313.171	348.859	YBR031W
YBR033W	chrII	301887	304762		22.7634	23.1052	10.9105	11.7325	9.64927	37.3329	29.7859	10.995	17.0436	12.5574	YBR033W
YBR034C	chrII	304750	306045		181.348	202.728	114.078	140.863	87.6955	82.2956	91.3167	97.7043	93.6029	110.688	YBR034C
YBR035C	chrII	306117	306989		124.725	136.19	54.3317	65.6684	67.6599	70.8128	74.8023	69.1641	69.3054	78.1331	YBR035C
YBR036C	chrII	308758	310388		88.9735	98.5045	43.3033	47.6132	47.7505	55.654	57.8644	45.0985	46.6939	50.6792	YBR036C
YBR037C	chrII	310496	311500		47.3047	52.4484	21.3987	24.0704	27.9947	36.9086	35.3202	27.1252	27.0846	29.9035	YBR037C
YBR038W	chrII	311846	314976		66.355	75.5082	32.0128	36.0059	34.5553	38.1453	46.1668	35.781	38.1433	41.0749	YBR038W
YBR039W	chrII	315483	316690		101.908	110.814	52.9608	60.1274	64.2673	65.8621	73.4968	60.0714	70.6453	66.9014	YBR039W
YBR041W	chrII	318185	320434		40.0352	47.738	18.3722	19.9815	16.8034	21.3799	26.1751	17.2894	20.2736	23.4713	YBR041W
YBR042C	chrII	320375	321671		52.9815	52.7238	22.2845	27.1546	24.177	30.9233	29.2692	25.2271	25.2094	27.9002	YBR042C
YBR043C	chrII	321757	324093		54.9585	49.6717	25.9881	25.7774	25.7594	33.8904	28.7297	26.2813	26.8415	23.7749	YBR043C
YBR044C	chrII	324264	326141		42.0713	43.3445	19.669	20.0134	20.3685	26.0516	25.4352	21.383	21.0765	22.1321	YBR044C
YBR046C	chrII	330467	331583		17.577	17.0384	7.75513	6.9386	8.68639	9.80384	11.5784	8.30279	8.20685	8.27129	YBR046C
YBR047W	chrII	331823	332426		20.1098	14.587	7.75733	5.75123	9.00327	9.12809	6.5435	11.1039	8.14076	6.37997	YBR047W
YBR048W	chrII	332751	334022	2_RPG	485.74	180.05	314.529	115.729	263.427	81.1383	51.752	274.203	148.476	86.883	YBR048W
YBR049C	chrII	333993	336966		89.7181	81.959	45.0861	41.7037	42.4337	50.8207	45.3981	44.5888	42.7453	38.159	YBR049C
YBR052C	chrII	338661	339422		48.8433	63.2016	19.7532	21.2506	35.9002	60.3989	52.7283	29.3358	38.0739	41.6386	YBR052C
YBR053C	chrII	339554	340774		28.9835	40.5025	11.1504	15.1169	17.9575	30.479	29.9861	15.6399	18.405	23.8666	YBR053C
YBR054W	chrII	342648	344498		28.2803	34.5088	25.0923	29.7417	32.0432	35.6771	36.3614	32.152	30.4904	37.9857	YBR054W
YBR055C	chrII	344476	347321		46.1161	50.4685	23.6836	27.1814	21.1108	23.2613	25.2824	23.5233	24.9968	25.1423	YBR055C
YBR056W	chrII	347808	349422		27.8127	37.5009	10.5576	12.6109	12.9552	20.088	24.7522	12.0504	14.7332	19.6999	YBR056W
YBR057C	chrII	352070	353402		87.5786	88.7703	48.2227	48.9563	40.3239	40.0536	41.5309	41.048	41.9468	44.289	YBR057C
YBR058C	chrII	353549	356038		47.0323	48.9611	25.5982	27.2009	20.0245	24.2891	25.8294	22.8299	23.4991	23.6522	YBR058C
YBR058C-A	chrII	356151	356644		79.4161	89.774	38.3104	40.6194	43.457	43.7922	45.5044	42.8875	44.307	47.3573	YBR058C-A
YBR059C	chrII	356798	360336		57.8488	69.9981	24.7822	30.5966	26.9743	37.3251	41.6349	27.3218	30.1456	34.58	YBR059C
YBR060C	chrII	360587	362631		56.5065	59.8461	29.6889	30.4993	25.1765	33.5299	32.6009	27.4266	30.23	29.8723	YBR060C
YBR061C	chrII	364656	365760	1_RiBi	80.765	84.5089	44.451	51.4475	40.4762	41.0892	44.4711	41.8792	44.4617	48.302	YBR061C
YBR062C	chrII	365870	366600		83.3451	86.0053	37.0543	40.4663	38.0139	44.9732	45.7057	39.4707	46.8494	45.0132	YBR062C
YBR066C	chrII	369940	370972		74.8308	75.6628	32.7898	34.6279	35.3981	38.9209	30.4768	36.0684	36.7008	36.2023	YBR066C
YBR067C	chrII	371982	372934		105.417	126.203	68.4177	77.0555	93.6532	135.596	78.0661	87.7225	91.2234	71.4801	YBR067C
YBR068C	chrII	373640	375751		531.074	599.002	219.599	246.066	274.648	213.784	261.322	273.403	282.964	296.978	YBR068C
YBR069C	chrII	376406	378537		223.362	221.231	109.76	116.403	133.986	104.845	101.47	132.144	137.03	124.664	YBR069C
YBR070C	chrII	379159	379986		81.4487	94.367	35.8388	40.1458	50.8885	58.8904	50.9825	47.9351	51.6435	53.4274	YBR070C
YBR071W	chrII	380327	381564		184.783	238.578	89.2731	107.375	117.644	152.14	135.123	105.323	127.462	121.068	YBR071W
YBR072W	chrII	381955	382841		24.0062	29.9764	12.8747	15.4116	13.675	36.261	21.7914	11.7134	13.5322	15.3204	YBR072W
YBR073W	chrII	383139	386052		80.8218	90.4013	38.2892	45.4495	38.9925	44.3334	46.0227	40.3534	42.2593	45.3735	YBR073W
YBR074W	chrII	386280	389333		45.4819	45.7307	23.1924	23.1836	19.3061	21.8249	22.4151	20.5859	22.9219	21.0339	YBR074W
YBR077C	chrII	391586	392415		115.191	147.711	48.9107	60.9994	75.0495	72.5752	74.8614	67.4085	64.4099	86.0055	YBR077C
YBR078W	chrII	392946	395237		466.401	540.397	241.542	281.092	222.289	159.033	188.238	230.809	201.594	244.69	YBR078W
YBR079C	chrII	395294	398301		232.845	228.175	135.576	147.726	100.813	97.7306	108.719	109.533	109.511	116.306	YBR079C
YBR080C	chrII	398439	400931		49.8204	54.2166	23.2995	25.1052	22.5242	24.775	25.3078	23.9574	26.1732	25.5104	YBR080C
YBR081C	chrII	401138	405396		46.2086	47.2791	25.3633	27.0008	19.9989	25.2242	25.8048	21.8388	23.234	23.0958	YBR081C
YBR082C	chrII	406459	407287		227.99	224.177	101.314	92.7961	108.294	203.128	144.556	102.509	145.97	110.5	YBR082C
YBR083W	chrII	409121	410712		113.206	98.6289	57.6851	51.0814	48.8354	44.3649	41.6848	48.1074	42.3203	39.8363	YBR083W
YBR084W	chrII	410970	414143		99.8337	79.2645	57.1247	53.4408	45.6204	40.3176	35.5063	49.8565	44.7764	38.7462	YBR084W
YBR084C-A	chrII	414062	415492	2_RPG	541.512	204.691	340.99	123.275	287.301	90.5866	62.5189	298.68	164.984	95.9969	YBR084C-A
YBR085W	chrII	415878	417089		16.9005	15.7836	7.31494	5.88577	5.80749	9.2874	5.84811	5.73826	5.01946	5.21941	YBR085W
YBR085C-A	chrII	418708	419263		97.156	121.877	34.6	36.2183	45.8119	59.4819	51.8509	40.0536	52.9143	52.0847	YBR085C-A
YBR086C	chrII	420077	423357		102.995	113.923	50.3029	55.3267	44.8963	47.7165	54.8851	47.9226	52.8179	59.7657	YBR086C
YBR087W	chrII	423734	424881		78.9062	82.15	38.3355	39.5644	37.5284	38.1979	35.998	39.8925	40.2125	40.7966	YBR087W
YBR088C	chrII	424933	425827		151.79	163.242	82.6568	82.6819	83.1461	92.5178	88.4977	83.8406	85.8468	86.1975	YBR088C
YBR089C-A	chrII	426013	426911		113.725	129.764	47.4587	50.5889	58.5833	50.098	47.6005	54.4713	51.354	59.7769	YBR089C-A
YBR091C	chrII	427064	427524		85.316	97.266	34.9462	46.7695	49.3495	60.7033	59.644	50.872	53.5833	61.8747	YBR091C
YBR092C	chrII	427652	429129		129.672	149.319	75.6988	95.9176	86.3859	61.8688	79.108	84.6351	75.7861	106.298	YBR092C
YBR093C	chrII	429490	430995		96.3156	119.195	44.8685	54.29	50.0978	54.2458	58.0286	48.1222	49.7486	59.7586	YBR093C
YBR094W	chrII	431969	434388		37.0419	38.6992	17.8625	18.538	15.369	20.757	21.9004	16.8216	18.6507	18.3121	YBR094W
YBR095C	chrII	434393	435737		63.2776	64.7951	34.3911	37.5117	28.5613	31.4839	34.6324	31.4578	34.2936	32.7495	YBR095C
YBR096W	chrII	435929	436792		73.6118	80.9737	30.29	34.5037	33.0021	35.4363	42.6536	33.3868	41.3954	42.6079	YBR096W
YBR097W	chrII	436919	441484		24.8349	24.7147	11.3098	11.4993	10.3799	17.1717	15.777	11.2571	12.8777	13.0758	YBR097W
YBR098W	chrII	441491	443805		40.531	37.539	17.4567	17.6432	17.2358	76.1066	40.2195	17.7759	27.3226	18.3675	YBR098W
YBR101C	chrII	443779	444764	4_HSF1	230.874	193.509	106.245	85.3279	115.327	320.315	176.223	107.27	172.22	88.3049	YBR101C
YBR102C	chrII	444714	447400		54.0719	56.1694	27.0016	27.3184	27.026	46.6861	34.484	27.3399	32.1537	27.1423	YBR102C
YBR103W	chrII	447542	449365		51.5985	58.7786	27.276	31.4672	26.2809	24.4403	28.2213	25.8057	26.8701	29.7918	YBR103W
YBR104W	chrII	449546	450790		72.5994	70.1866	40.7664	40.8018	31.9199	34.2019	32.5442	35.4904	34.5571	35.173	YBR104W
YBR105C	chrII	450763	452037		52.7422	56.6495	31.3806	37.3403	23.9689	34.2832	29.2732	23.7692	23.9748	25.625	YBR105C
YBR106W	chrII	452618	453365		269.048	235.922	127.943	114.781	148.048	131.299	115.887	140.848	140.816	121.421	YBR106W
YBR107C	chrII	453251	454584		67.0463	65.0001	27.6525	29.8366	33.3632	42.4187	38.1597	34.3372	36.3313	34.0287	YBR107C
YBR108W	chrII	454806	457809		25.7089	32.4463	11.6463	14.1883	12.5147	22.8502	19.6444	11.7661	13.6265	15.8447	YBR108W
YBR109C	chrII	457723	458447		132.834	150.062	65.9464	75.9243	70.7231	74.8816	85.758	69.623	76.0721	86.4454	YBR109C
YBR110W	chrII	458656	460331		44.2713	49.3913	23.0718	25.7225	22.2622	21.344	25.5943	22.9095	23.0715	25.8644	YBR110W
YBR111C	chrII	461102	461873		52.8451	64.7562	22.4674	23.3214	29.5269	36.3299	39.5212	26.5866	31.0774	34.339	YBR111C
YBR111W-A	chrII	462097	462743		56.932	60.1747	29.2257	31.4679	29.3576	31.2632	35.7195	31.2676	36.5888	36.7026	YBR111W-A
YBR112C	chrII	462698	465971		134.923	151.696	70.3137	75.8004	65.262	65.9901	72.8897	61.7402	63.0516	66.8955	YBR112C
YBR114W	chrII	467145	469710		32.2046	39.0238	18.2581	22.1428	16.1637	25.7383	25.2069	17.2126	21.0631	21.3957	YBR114W
YBR115C	chrII	469697	474042		66.834	56.0269	33.2351	29.5067	30.5192	37.8516	29.1619	34.1298	33.6476	26.177	YBR115C
YBR117C	chrII	474262	476477	3_MSN2	30.8593	25.0712	12.2246	10.2714	15.4233	20.5411	16.364	14.8949	15.0803	13.2485	YBR117C
YBR118W	chrII	477648	479138		1720.67	1611.86	587.74	599.683	593.096	344.536	544.03	434.307	639.025	579.591	YBR118W
YBR119W	chrII	479228	480469		62.5018	69.9055	29.0294	30.6349	30.0312	32.1712	34.6234	32.9499	30.1361	33.1342	YBR119W
YBR120C	chrII	480368	480992		68.0966	69.0885	28.8724	30.9709	30.8746	30.3385	38.6237	33.2583	32.9039	36.8265	YBR120C
YBR121C	chrII	481260	483459	1_RiBi	175.715	169.244	100.585	105.037	74.5074	67.189	74.2902	81.6808	79.9663	82.1968	YBR121C
YBR122C	chrII	483772	484551		125.256	123.706	55.9396	59.5336	66.6074	71.0597	68.9046	68.4293	68.3099	70.3157	YBR122C
YBR123C	chrII	484683	486758		44.7493	48.5724	21.38	23.1227	20.0133	23.8399	23.2713	20.0566	22.8554	23.4012	YBR123C
YBR125C	chrII	486959	488567		40.3584	38.2571	17.9953	17.4584	18.581	24.8135	20.3804	18.2739	22.2653	19.4342	YBR125C
YBR126C	chrII	488773	490498		64.4878	87.5806	23.6912	23.7231	42.0414	60.1451	58.269	31.163	36.8401	42.1343	YBR126C
YBR127C	chrII	491101	492889		125.691	126.471	61.8255	55.066	58.317	62.5182	61.4944	54.8695	57.8593	58.2678	YBR127C
YBR128C	chrII	492958	494119		47.2663	53.0841	19.5679	21.0004	25.5028	29.9016	28.3104	25.281	24.6377	27.93	YBR128C
YBR129C	chrII	494262	495387		49.0178	49.4286	22.0042	24.0848	22.7882	26.0028	24.2926	23.2851	26.5393	26.0442	YBR129C
YBR130C	chrII	495478	496937		83.6895	86.4835	46.4887	46.6805	38.7952	43.9168	47.1733	40.8877	46.4906	46.3276	YBR130C
YBR131W	chrII	497118	499359		32.3677	32.1444	15.8048	17.2891	12.9883	16.6093	16.496	14.2517	15.9882	15.7026	YBR131W
YBR132C	chrII	499347	501593		19.1397	28.6657	7.12025	9.48089	11.0732	22.1557	24.9906	9.72449	14.7819	14.9279	YBR132C
YBR133C	chrII	501682	504434		44.5401	45.2842	15.6525	16.9384	16.9666	22.649	23.3889	16.5251	18.1639	18.6291	YBR133C
YBR135W	chrII	504744	505516		57.7658	68.4979	24.6312	29.4255	31.0127	34.6817	35.2044	28.7474	31.9082	33.6474	YBR135W
YBR136W	chrII	505633	512906		23.7673	23.4351	10.751	11.2997	9.60584	13.3274	13.2467	10.7201	10.6838	11.4873	YBR136W
YBR137W	chrII	512907	513720		56.3833	65.4668	25.7447	28.8881	29.0068	29.4436	36.1637	27.1235	31.1367	36.8176	YBR137W
YBR138C	chrII	513611	515408		39.2775	44.403	17.7515	23.3136	17.1549	18.8969	23.5123	17.9518	19.5403	23.3429	YBR138C
YBR139W	chrII	515652	517361		44.1549	61.1432	15.2848	17.7679	22.954	29.2583	38.5566	21.4815	24.601	31.5085	YBR139W
YBR140C	chrII	517248	526917		45.5729	47.6838	20.8919	22.3671	18.3991	28.2086	31.7481	20.5694	26.0641	23.9144	YBR140C
YBR141C	chrII	526942	528070		59.1844	53.8218	35.2001	36.475	32.1944	35.3571	30.5831	33.5254	32.5337	32.7748	YBR141C
YBR142W	chrII	528240	530816		80.1968	71.237	49.2097	53.0122	30.5246	34.4257	33.1587	36.1325	36.6885	35.2821	YBR142W
YBR143C	chrII	530730	532270		226.266	227.965	131.799	145.676	110.303	122.092	128.489	120.163	126.74	131.901	YBR143C
YBR145W	chrII	533705	534927		27.2929	30.7658	11.3893	13.046	11.4617	14.715	13.1285	11.6954	11.7104	12.6279	YBR145W
YBR146W	chrII	535170	536300		84.4217	87.3456	39.6522	43.1814	39.3801	41.5034	46.7355	39.4176	42.2247	45.1054	YBR146W
YBR149W	chrII	539910	541124		61.0376	83.872	25.1056	29.4256	35.3485	47.9196	57.0179	32.1004	38.4184	48.5692	YBR149W
YBR150C	chrII	541199	544523		52.188	56.6388	26.216	29.0147	21.8991	32.4383	31.0337	23.4775	25.5804	26.4508	YBR150C
YBR151W	chrII	544865	546112		82.8504	94.7352	70.2579	73.5553	70.7103	80.0371	80.6534	69.9906	73.7915	74.8292	YBR151W
YBR154C	chrII	548264	549131	1_RiBi	229.86	240.221	137.595	150.806	104.305	100.799	113.347	112.242	118.355	124.597	YBR154C
YBR155W	chrII	549673	551020		67.9435	64.6778	43.267	44.5274	31.0655	42.441	33.1308	33.5383	35.9889	31.4021	YBR155W
YBR156C	chrII	550924	553254		44.5821	53.7305	24.0087	29.2755	18.0319	37.7389	31.5789	19.2358	21.4175	24.4517	YBR156C
YBR158W	chrII	556285	558348		295.408	290.864	192.12	202.868	170.441	165.373	195.65	181.999	162.84	171.699	YBR158W
YBR159W	chrII	558620	559816		76.9534	86.9679	37.6349	41.3553	37.2866	39.8834	44.3169	35.7594	40.4466	43.5713	YBR159W
YBR160W	chrII	559999	561070		94.3555	110.011	49.0402	54.746	46.5734	55.5384	62.6229	47.0689	51.7739	59.6012	YBR160W
YBR161W	chrII	561406	563080		47.8161	53.0224	20.5631	21.4857	26.4717	41.6708	36.4698	27.049	26.9705	30.3109	YBR161W
YBR162C	chrII	562925	564807		216.703	244.692	120.855	142.542	100.395	100.965	113.404	101.042	99.1932	115.34	YBR162C
YBR162W-A	chrII	565167	565517		198.748	241.328	85.5884	102.869	118.75	116.2	120.84	114.474	101.826	124.501	YBR162W-A
YBR163W	chrII	565607	567793		50.2851	54.3281	24.6853	26.4804	22.9667	46.7836	38.9539	25.3013	27.7788	27.63	YBR163W
YBR164C	chrII	567753	568566		80.8666	87.4283	44.3122	48.031	41.042	53.2128	49.586	44.1627	50.6788	50.2207	YBR164C
YBR165W	chrII	568759	569731		59.7223	63.6752	27.7562	30.7911	27.828	34.1983	36.5242	31.9983	34.4405	34.8451	YBR165W
YBR166C	chrII	569728	571242		57.7913	58.7461	27.8441	30.0518	23.6583	31.5846	30.9383	25.3891	28.076	29.5541	YBR166C
YBR167C	chrII	571400	572139		82.801	90.2624	37.8663	43.5137	41.8467	48.7099	53.0393	42.6033	47.5591	50.4136	YBR167C
YBR168W	chrII	572054	573810		29.5057	30.0148	14.5814	15.5383	14.301	20.4789	20.3437	14.0548	15.9862	18.0971	YBR168W
YBR169C	chrII	573744	576029		17.6125	23.4741	10.471	11.0756	9.27428	40.0275	27.6118	8.299	13.6145	13.6416	YBR169C
YBR170C	chrII	576209	578135		59.72	57.124	26.0784	24.521	27.9685	49.2624	38.5745	26.9085	35.8384	28.6494	YBR170C
YBR171W	chrII	578314	579139		94.0705	99.2578	53.892	56.1794	45.602	49.8575	54.7836	49.638	55.1242	53.394	YBR171W
YBR172C	chrII	579048	581490		160.773	152.44	88.86	91.3753	68.9731	76.23	78.4898	75.1265	72.7318	75.3332	YBR172C
YBR173C	chrII	581659	582214		139.761	142.64	64.5175	69.773	91.6682	109.729	95.4066	81.0576	91.2563	92.8632	YBR173C
YBR175W	chrII	582384	583467		57.192	56.0717	27.7022	29.9999	31.9059	42.3593	39.0598	30.6613	34.4856	32.9432	YBR175W
YBR176W	chrII	583601	584804		34.3249	34.511	16.3253	16.0923	17.6132	30.0784	24.1908	18.0882	21.7659	19.3553	YBR176W
YBR177C	chrII	584645	586234		65.8381	78.7899	32.0746	33.6005	36.3027	51.5419	49.7437	36.2234	40.7339	42.3637	YBR177C
YBR179C	chrII	586490	589178		40.7624	40.9783	20.4128	20.6847	17.9285	25.922	25.0163	19.6702	21.1546	20.2378	YBR179C
YBR181C	chrII	591608	592838	2_RPG	509.88	202.85	326.89	127.199	253.509	95.5132	72.0661	259.67	159.984	98.5966	YBR181C
YBR182C	chrII	593230	595017		29.0125	30.8064	14.1979	14.8536	11.1353	14.0027	14.2174	11.6464	11.1862	12.7623	YBR182C
YBR183W	chrII	595982	597172		23.2166	32.9215	10.5514	12.3767	13.4953	21.688	29.4576	12.3457	14.3578	24.0513	YBR183W
YBR184W	chrII	597289	598975		18.4575	19.8581	7.85819	8.99795	9.25289	8.917	9.59165	9.43548	9.45429	10.7271	YBR184W
YBR185C	chrII	599080	600010		47.3305	51.6526	25.8238	26.5888	22.8302	28.2774	30.1331	23.5726	26.0552	27.1232	YBR185C
YBR187W	chrII	602499	603637		103.558	90.2323	49.226	46.2288	48.9411	52.5489	48.4139	47.6662	48.3017	45.7913	YBR187W
YBR188C	chrII	603610	604205		53.5296	48.8893	23.6453	22.1655	32.2768	30.0332	27.5179	28.9595	25.4151	24.8342	YBR188C
YBR189W	chrII	604453	605579	2_RPG	672.962	262.138	421.129	152.587	339.57	121.709	89.6672	347.896	224.963	127.88	YBR189W
YBR191W	chrII	606247	607270	2_RPG	563.556	220.4	335.682	130.791	290.955	101.547	67.8063	298.064	174.476	106.014	YBR191W
YBR192W	chrII	607488	609057		66.1749	61.3169	31.8163	30.504	28.5878	34.4711	33.8925	29.7169	31.2602	30.6664	YBR192W
YBR193C	chrII	608620	609812		57.0654	60.1969	30.7663	29.902	31.2938	40.2815	36.975	30.8085	33.5627	34.0961	YBR193C
YBR194W	chrII	609896	610620		52.6058	50.8799	22.6938	23.5749	25.9124	33.1256	33.3635	26.4433	30.6238	32.9921	YBR194W
YBR195C	chrII	610488	611927		48.0544	53.1377	25.5125	27.7193	24.6891	29.0317	31.8292	25.232	25.7803	29.6911	YBR195C
YBR196C	chrII	612070	614007		406.398	463.164	206.957	245.326	189.146	168.239	185.272	193.591	186.653	208.957	YBR196C
YBR197C	chrII	614793	615890		109.22	123.66	53.0111	54.5306	66.9033	72.9214	67.6708	62.4135	65.4724	70.1455	YBR197C
YBR198C	chrII	616053	618600		79.8843	85.933	43.9007	45.1574	36.5936	61.3038	60.2249	37.587	45.984	42.1969	YBR198C
YBR199W	chrII	618809	620433		76.0512	86.1092	36.0046	38.1422	38.0167	51.6659	54.0711	38.111	45.4759	44.5328	YBR199W
YBR200W	chrII	620808	622784		40.5518	40.7646	19.5946	20.5134	16.6028	23.0346	22.6259	17.8728	19.8233	20.2716	YBR200W
YBR201W	chrII	623425	624337		28.3307	33.3971	12.9431	13.5836	12.8748	15.8442	18.5284	13.1738	14.5059	18.1088	YBR201W
YBR201C-A	chrII	624299	624739		14.1073	18.7721	4.65223	6.78573	3.47548	7.62641	6.4617	5.13077	5.63702	6.73818	YBR201C-A
YBR202W	chrII	625706	628459		81.9205	88.9519	40.5866	48.2723	36.9371	42.5286	46.3383	39.1727	38.0832	45.7642	YBR202W
YBR203W	chrII	628972	631961		27.7807	36.4268	13.372	16.7277	12.4123	18.6995	18.1267	11.8314	14.6338	16.5779	YBR203W
YBR204C	chrII	631997	633448		21.23	23.6338	9.19912	10.2759	11.2928	16.0275	15.7337	10.6661	12.7057	13.6086	YBR204C
YBR205W	chrII	633574	635016		56.8669	55.9954	25.4233	28.7486	27.9421	33.1337	31.4922	28.3285	30.5587	30.5732	YBR205W
YBR207W	chrII	635056	636662		73.5728	88.1548	39.1011	47.1709	34.7782	39.884	41.2416	38.7008	41.8871	42.8508	YBR207W
YBR208C	chrII	636576	642305		53.0782	60.218	21.4303	25.7694	17.9536	28.0028	31.5919	18.5407	22.6868	23.7809	YBR208C
YBR210W	chrII	645327	646194		42.0038	47.0779	20.0913	21.0804	18.9117	21.0475	23.6819	21.0072	21.8898	24.6414	YBR210W
YBR211C	chrII	646045	647244		51.9885	51.9215	22.5456	25.5268	21.633	27.9138	27.9994	22.6437	26.3792	27.0106	YBR211C
YBR212W	chrII	647437	650112		40.6725	42.1508	16.2256	17.7572	18.5579	28.6516	26.044	17.8722	21.1944	20.6886	YBR212W
YBR214W	chrII	651335	653190		33.8535	46.8214	11.66	14.7309	16.1997	27.9227	30.1733	13.3499	15.2947	20.9661	YBR214W
YBR215W	chrII	653314	655435		52.5268	58.2566	30.1489	31.6948	24.0278	33.3913	32.6928	25.807	29.0731	27.6362	YBR215W
YBR216C	chrII	655302	657632		45.8184	46.2747	22.3667	23.6736	19.1919	25.4877	26.5151	20.9166	23.6887	23.5846	YBR216C
YBR217W	chrII	657767	658614		45.8129	50.2914	23.8044	23.1811	25.0929	27.4896	27.2869	24.8025	27.1017	27.5769	YBR217W
YBR218C	chrII	658593	662391		70.6862	81.4222	31.2038	36.9799	32.476	43.8736	45.0285	32.4134	39.37	41.0724	YBR218C
YBR220C	chrII	662868	664758		32.4407	33.1696	16.0484	16.6759	15.7323	16.8102	17.0691	15.9534	16.5544	16.7853	YBR220C
YBR221C	chrII	664912	666486		85.8835	97.4238	36.083	41.522	38.2133	42.8361	47.9775	37.3172	41.4277	42.5758	YBR221C
YBR222C	chrII	666604	668392		38.3341	50.5654	18.4854	22.6562	17.75	22.5522	25.4327	16.9626	18.5074	23.4797	YBR222C
YBR223C	chrII	668402	670325		26.6627	31.2091	11.9152	13.4365	13.5443	15.3851	16.3599	12.2904	12.5763	14.6561	YBR223C
YBR225W	chrII	670473	673479		30.9422	34.3702	13.702	15.3078	12.991	17.784	19.9863	13.8915	16.3314	16.5454	YBR225W
YBR227C	chrII	673462	675191		43.855	45.3238	23.4003	24.5907	19.9147	23.2406	25.2272	20.5553	21.0078	23.6425	YBR227C
YBR228W	chrII	675312	676341		52.8188	51.4577	26.4245	28.8048	24.5066	26.5703	28.051	25.6206	27.6425	28.5641	YBR228W
YBR229C	chrII	676225	679247		31.0585	31.1265	13.5063	14.4648	15.0216	25.3258	24.3441	14.9554	19.5651	17.7327	YBR229C
YBR230C	chrII	679384	680106		41.2627	44.7643	16.9377	14.9392	32.5185	36.161	32.8439	24.1105	29.1644	29.1003	YBR230C
YBR230W-A	chrII	680283	680696		262.835	252.015	95.0283	89.6312	125.958	120.852	104.98	129.213	106.55	100.541	YBR230W-A
YBR231C	chrII	682138	683146		58.6276	60.3217	29.3239	31.3002	38.6083	48.6639	35.7017	37.444	34.8481	30.9768	YBR231C
YBR233W	chrII	683348	684830		37.9916	39.2373	16.3068	17.1237	17.0144	22.3094	21.1801	16.9935	18.8638	19.4277	YBR233W
YBR233W-A	chrII	684933	685497		46.9764	51.1578	19.9171	21.3691	21.6532	25.2134	26.389	20.8468	24.0566	26.3876	YBR233W-A
YBR234C	chrII	685396	686637		58.3555	70.1581	24.3492	27.4976	28.5443	41.4701	42.9901	26.9405	31.9417	35.0396	YBR234C
YBR235W	chrII	686819	690355		31.0957	36.1687	13.1685	14.4931	12.5924	24.9177	23.7739	13.4863	17.4126	16.0437	YBR235W
YBR236C	chrII	690241	691742		63.1047	66.2335	32.2058	33.0545	28.8929	35.5685	37.2108	29.0242	33.7894	33.9706	YBR236C
YBR237W	chrII	691912	694682		37.7757	44.8801	19.8239	21.9824	15.9415	19.8466	22.312	17.6124	20.1197	20.7493	YBR237W
YBR238C	chrII	694605	697374		55.5297	60.308	33.9697	39.8463	20.9154	35.4563	29.4282	25.3166	31.3475	29.97	YBR238C
YBR239C	chrII	698289	700091		66.8982	72.0588	31.8209	35.9244	28.3584	36.6759	37.3437	28.4572	31.2994	34.9138	YBR239C
YBR240C	chrII	700483	702033		14.5789	20.3963	5.99265	7.83481	9.08967	8.85207	11.1215	7.8604	8.38831	10.8235	YBR240C
YBR241C	chrII	702534	704083		11.3557	14.6654	4.85812	5.82433	6.56068	8.51537	9.6846	5.71192	6.09963	7.22314	YBR241C
YBR242W	chrII	704501	705454		103.791	118.76	58.1988	72.5926	50.5586	47.3693	53.4364	52.5138	54.0346	65.9043	YBR242W
YBR243C	chrII	705238	706849		43.3539	49.2257	18.7637	22.2236	18.1793	27.5677	27.1288	19.5891	21.6328	22.2808	YBR243C
YBR244W	chrII	707347	708138		47.7335	47.8196	24.4567	27.8917	21.8019	23.3562	23.6295	23.6771	23.1046	24.7582	YBR244W
YBR245C	chrII	708040	711539		63.8123	67.6862	34.7259	39.3379	27.3196	29.3322	32.2609	30.6802	31.9449	34.3669	YBR245C
YBR246W	chrII	711518	712883		60.3973	71.5978	35.087	40.1703	30.9006	33.376	37.5151	34.6523	37.1144	40.2979	YBR246W
YBR247C	chrII	712885	714536	1_RiBi	114.824	109.885	82.0195	83.9591	50.5316	52.283	51.7577	58.2003	60.7984	58.2577	YBR247C
YBR248C	chrII	714720	716560		96.1669	94.7929	50.4713	52.9663	43.9273	49.9703	48.2317	46.1988	49.4752	44.7117	YBR248C
YBR249C	chrII	716769	718129		115.436	95.4557	51.4211	45.8465	48.6306	41.6916	36.9754	52.8011	47.11	44.8658	YBR249C
YBR251W	chrII	721321	722431		64.2801	67.6628	34.1605	36.3093	33.7952	37.0897	42.4284	32.7996	37.4067	38.4855	YBR251W
YBR252W	chrII	722566	723129		89.4869	104.606	41.4817	49.9207	56.2114	50.1569	51.3834	50.3734	51.6262	55.8793	YBR252W
YBR253W	chrII	723208	723728		81.4925	80.5661	34.5931	40.5447	37.2314	38.3618	42.7815	35.9539	40.6479	43.1958	YBR253W
YBR254C	chrII	723572	724279		63.6247	63.7213	28.0292	32.4571	29.6676	31.0448	35.4573	30.575	33.0564	33.4501	YBR254C
YBR255W	chrII	724415	726641		34.842	39.8763	17.6926	19.721	15.8387	22.6197	22.6515	16.0401	17.5546	19.0851	YBR255W
YBR255C-A	chrII	726518	727114		86.7998	85.7513	31.0914	34.4891	38.536	40.0719	40.3045	37.0941	43.3029	42.8652	YBR255C-A
YBR256C	chrII	727330	728109		58.8891	70.2308	35.9514	35.9891	38.111	43.2757	42.7029	37.6605	42.5816	39.4462	YBR256C
YBR257W	chrII	728853	729866		63.5521	65.1601	38.3844	40.3096	28.0076	30.0815	31.4577	31.252	32.9696	34.8109	YBR257W
YBR258C	chrII	729670	730194		60.8377	65.8209	29.4759	33.456	27.0883	29.7361	34.7619	29.7263	27.7822	36.8199	YBR258C
YBR259W	chrII	730326	732596		30.3758	30.5712	13.8682	15.7193	11.9304	18.6668	17.9998	14.3756	15.4467	15.4659	YBR259W
YBR260C	chrII	732533	734675		40.8435	45.4039	19.8806	21.8662	18.5584	28.4814	25.7551	19.8432	22.0881	22.1539	YBR260C
YBR261C	chrII	734715	735572		53.4676	62.5867	27.0631	34.7619	32.0341	36.3627	36.641	30.857	33.6971	34.9422	YBR261C
YBR262C	chrII	735634	736086		116.683	119.206	50.5789	58.0069	61.1365	65.4311	74.2556	59.0095	61.8724	65.3308	YBR262C
YBR263W	chrII	736178	737793		73.956	71.4768	37.7341	38.9035	37.7456	51.2542	45.2859	37.2191	41.186	36.3024	YBR263W
YBR264C	chrII	737734	738406		53.6239	59.4613	26.5962	28.7237	27.4423	34.3725	33.9295	28.2959	27.2942	29.4888	YBR264C
YBR265W	chrII	738497	739678		89.0767	96.005	46.591	55.2007	47.9397	50.4687	49.1926	45.8436	46.7856	51.9784	YBR265W
YBR267W	chrII	739823	741132	1_RiBi	134.985	139.736	86.8423	96.613	62.7179	59.9372	63.271	68.0169	67.5153	69.2482	YBR267W
YBR268W	chrII	741268	741726		57.6218	67.033	22.8385	27.5417	34.1212	32.2758	34.9501	30.0564	30.1221	33.704	YBR268W
YBR269C	chrII	742000	742596		42.4	52.0054	18.0323	23.0544	23.5162	23.5692	30.7094	19.5121	26.4257	30.812	YBR269C
YBR270C	chrII	742694	744669		27.7137	30.7532	12.8032	16.171	13.3499	16.145	17.7304	12.9186	15.4738	16.4453	YBR270C
YBR271W	chrII	744811	746262		45.1488	47.7459	27.5391	31.0698	20.5731	24.9212	23.3911	23.2124	25.5391	24.0293	YBR271W
YBR272C	chrII	746177	747849		37.4066	44.0421	17.7459	20.1111	14.9959	19.342	21.411	16.4237	19.0496	21.7517	YBR272C
YBR273C	chrII	747962	749401		36.3466	45.1216	19.2377	21.471	18.8984	23.6349	24.7906	19.1558	20.7163	22.0637	YBR273C
YBR274W	chrII	749531	751371		29.2387	32.2747	13.3171	14.6118	12.8283	15.3986	16.3652	14.5717	14.7082	14.9791	YBR274W
YBR275C	chrII	751239	757179		38.4444	37.7501	19.8221	20.6674	15.5224	21.2818	20.696	17.3535	17.8996	17.0478	YBR275C
YBR276C	chrII	757542	760139		35.8069	38.5832	15.6865	17.3158	15.516	19.3789	19.6793	15.8876	17.0379	18.1511	YBR276C
YBR278W	chrII	760246	760992		55.0157	62.042	23.4546	23.2023	27.7844	32.0652	30.0369	26.898	30.0305	29.9801	YBR278W
YBR279W	chrII	761209	762739		87.0788	96.028	47.2193	53.6578	38.2708	45.8639	47.671	39.2948	44.4277	45.8485	YBR279W
YBR280C	chrII	762678	764725		23.4818	27.3679	10.2742	11.2161	10.9769	19.8248	16.5507	10.3276	12.3415	13.5897	YBR280C
YBR281C	chrII	764840	767654		41.507	43.1185	19.2038	18.8478	16.2092	21.3766	19.5741	17.0816	18.2554	18.4009	YBR281C
YBR282W	chrII	768192	768773		86.5934	94.6469	44.7389	49.9454	46.0005	48.9685	54.9914	46.6064	50.1437	55.3977	YBR282W
YBR283C	chrII	768778	770636		155.161	155.002	79.9528	80.0089	68.4863	72.2515	71.7521	73.6336	75.5764	72.057	YBR283C
YBR284W	chrII	770868	773737		11.9856	16.2768	5.13589	6.26248	6.04507	12.6707	11.2514	6.39125	7.64116	8.06751	YBR284W
YBR285W	chrII	773813	774428		12.7597	16.7662	4.15823	6.35467	5.73795	9.92003	11.1606	6.58389	6.55932	10.0033	YBR285W
YBR286W	chrII	774686	776381	3_MSN2	130.574	159.821	49.6909	59.8216	57.7252	71.6457	73.4466	54.2731	58.1287	65.8959	YBR286W
YBR287W	chrII	776537	777966		103.088	128.615	37.5031	47.2655	40.9767	58.8439	63.1342	41.8925	45.8981	50.5978	YBR287W
YBR288C	chrII	777813	779520		63.0503	66.1083	27.8836	31.4037	24.3786	29.952	31.1194	26.7331	29.2109	28.3432	YBR288C
YBR289W	chrII	779604	782442		48.9692	52.8728	25.7966	28.4561	23.0998	27.4382	28.0574	22.9373	23.9505	24.0651	YBR289W
YBR290W	chrII	782549	783658		91.8989	104.026	48.7799	54.0929	43.6463	51.8571	57.6331	43.1179	48.4836	47.9319	YBR290W
YBR291C	chrII	783626	784607		75.1045	80.204	35.2903	39.2576	32.9341	46.2683	38.7672	35.9338	41.2895	40.4606	YBR291C
YBR293W	chrII	787005	788647		44.8219	45.446	22.9692	23.9437	22.2755	25.8741	25.8799	23.1218	25.2905	24.7961	YBR293W
YBR295W	chrII	792779	796655		42.1883	58.0629	19.7423	28.7009	16.9026	20.3086	24.8157	17.9815	19.0777	23.477	YBR295W
YBR296C	chrII	796531	798600		7.24284	10.0711	2.40011	3.57679	3.22854	3.88447	4.00315	3.08639	2.7509	3.94282	YBR296C
YBR297W	chrII	800458	802174		23.9701	31.2191	9.07357	11.386	9.56294	15.4263	15.5958	8.51769	11.0451	13.3758	YBR297W
YBR298C	chrII	802537	804900	3_MSN2	40.0064	45.349	14.9077	14.6855	19.6883	36.172	33.3394	17.4966	24.3469	23.4607	YBR298C
YBR299W	chrII	805262	807180		42.4358	45.0896	19.8815	21.2728	20.2155	27.054	26.4207	19.6985	23.8942	24.7113	YBR299W
YBR301W	chrII	809006	809466		2.75146	2.37957	1.93328	1.5982	1.81441	5.75943	3.00241	1.78017	2.6167	1.72204	YBR301W
YBR302C	chrII	810262	811501		8.38157	9.50603	5.60283	6.6561	4.99044	8.00938	8.53357	5.50191	6.2155	6.7709	YBR302C
YCL069W	chrIII	9284	11173		15.4936	15.3701	7.77897	9.38845	7.26221	8.16353	8.2664	7.2774	7.56514	7.60197	YCL069W
YCL067C	chrIII	12365	13029		68.9012	66.6632	37.9866	38.7981	18.7698	19.9695	20.7905	20.0939	22.8953	23.5129	YCL067C
YCL064C	chrIII	15414	16939		118.777	186.841	86.898	108.781	53.5041	54.4316	61.412	63.3667	59.0969	71.2091	YCL064C
YCL063W	chrIII	17238	18612		76.0152	83.3085	40.8653	45.2528	37.7184	51.0943	49.0348	39.9075	40.46	42.3251	YCL063W
YCL061C	chrIII	18672	22171		52.8478	55.7613	28.5677	30.647	24.075	29.7116	30.2415	25.1459	24.8515	25.0271	YCL061C
YCL059C	chrIII	22322	23443	1_RiBi	120.13	126.348	71.9866	84.7805	55.3688	62.3178	61.8009	60.5013	62.2493	65.5324	YCL059C
YCL058W-A	chrIII	23532	23991		150.144	181.178	90.4915	96.3474	88.9145	82.9427	87.397	86.0405	85.2739	96.3222	YCL058W-A
YCL057C-A	chrIII	23903	24386		110.673	121.411	55.4734	59.7585	76.0584	79.0035	75.9667	68.4404	68.2934	73.4054	YCL057C-A
YCL057W	chrIII	24732	27033		59.2937	58.676	26.6251	27.0522	30.2508	50.6734	42.1341	30.3552	37.5999	32.0229	YCL057W
YCL056C	chrIII	26908	27651		65.0079	64.4294	36.3274	36.486	32.7865	45.4339	44.0594	32.4792	34.5903	35.2696	YCL056C
YCL055W	chrIII	27913	29020		59.5415	50.3532	36.4193	35.6939	79.5012	71.4905	65.9525	79.0595	68.9311	73.5851	YCL055W
YCL054W	chrIII	31396	34045	1_RiBi	127.664	129.572	87.8652	100.683	62.5954	78.1549	77.6526	71.9889	71.7885	72.1883	YCL054W
YCL052C	chrIII	33972	35462		50.8582	62.0982	24.2577	26.5667	26.7301	36.9301	39.7454	25.7777	27.6303	31.7817	YCL052C
YCL051W	chrIII	35555	37658		50.5481	57.5749	24.5582	28.5873	26.5729	37.2119	38.1752	25.2889	29.4497	31.075	YCL051W
YCL050C	chrIII	37719	38862		113.736	101.951	52.3802	48.9156	54.3188	105.612	70.3274	51.386	67.0934	48.8743	YCL050C
YCL049C	chrIII	39588	40796		48.8789	71.3737	15.9185	24.944	20.5299	32.9274	36.7627	20.0372	21.8352	30.5908	YCL049C
YCL047C	chrIII	43571	44465		33.7713	38.0549	17.0991	17.3688	17.369	22.8223	21.7699	15.9568	20.2451	19.2397	YCL047C
YCL045C	chrIII	44562	46969		65.8182	69.9781	31.1203	32.904	31.2208	36.9486	38.9529	31.5592	32.393	33.3288	YCL045C
YCL044C	chrIII	47000	48440		68.5647	75.0036	35.2814	37.9238	38.4642	48.9739	46.1025	35.1446	40.4339	39.6727	YCL044C
YCL043C	chrIII	48555	50257		194.54	217.186	83.4962	97.474	107.166	135.172	124.595	100.003	104.348	101.071	YCL043C
YCL040W	chrIII	50780	52520		37.7013	66.3499	9.71939	11.443	30.7173	79.0521	84.515	19.7399	27.1191	34.897	YCL040W
YCL039W	chrIII	52624	54948		40.2718	42.186	16.5484	17.8205	18.4691	26.8069	24.7891	17.1328	18.1523	18.6624	YCL039W
YCL038C	chrIII	54813	56625		23.6762	36.3206	9.22262	12.829	9.99243	18.0087	19.2239	9.65954	11.1364	17.2169	YCL038C
YCL037C	chrIII	56743	58744	1_RiBi	266.716	217.896	153.402	134.083	131.588	104.32	105.252	129.044	107.659	102.381	YCL037C
YCL036W	chrIII	58971	60815		91.1171	83.7034	67.5111	71.7005	50.1697	53.7655	46.4221	50.2607	45.0718	45.582	YCL036W
YCL035C	chrIII	60724	61236		74.1187	92.1872	33.94	42.4453	39.7173	53.1915	59.8294	38.9892	43.0172	51.0034	YCL035C
YCL034W	chrIII	61601	62732		51.912	60.7875	24.4491	29.0328	29.8369	39.3249	39.2043	25.9158	30.3106	33.739	YCL034W
YCL033C	chrIII	62698	63292		22.6983	28.1176	8.39291	13.5018	14.716	21.6502	19.4577	12.9608	14.1754	14.994	YCL033C
YCL032W	chrIII	63363	64583		45.3628	47.3337	23.1352	24.2347	23.2351	28.2792	28.5091	22.2302	24.8066	24.9296	YCL032W
YCL031C	chrIII	64571	65618	1_RiBi	167.827	180.016	101.776	111.62	89.2328	92.0653	101.076	91.7662	94.0058	98.5811	YCL031C
YCL030C	chrIII	65805	68392		59.6696	70.1014	22.4764	26.6452	26.1708	30.2281	26.8444	26.1908	25.4907	24.5485	YCL030C
YCL029C	chrIII	68436	69980		62.0933	68.9629	31.0737	33.8874	31.1128	31.2599	30.6943	30.5048	28.2929	29.85	YCL029C
YCL028W	chrIII	70066	71441		46.7817	52.2288	24.1513	26.9242	25.7217	31.0862	29.454	24.8352	26.3455	26.5546	YCL028W
YCL026C-B	chrIII	73342	74020		11.2834	10.7662	5.85599	6.31251	5.51401	8.55925	7.65528	5.54829	6.60717	6.70055	YCL026C-B
YCL025C	chrIII	75940	78022		175.477	196.818	75.5893	91.2654	96.7133	80.2238	88.6398	81.9971	77.064	84.8676	YCL025C
YCL024W	chrIII	79089	82340		36.797	43.3699	17.4436	20.1832	17.9791	21.7768	20.7409	17.369	17.6411	18.9559	YCL024W
YCL018W	chrIII	91158	92564		188.516	204.413	40.2683	39.7631	56.0468	54.8461	53.4829	54.9882	58.6823	62.7042	YCL018W
YCL017C	chrIII	92621	94396		55.0657	62.0849	26.9729	31.5342	26.7026	34.9408	33.2465	27.3564	28.1446	28.4219	YCL017C
YCL016C	chrIII	94528	95794		43.9535	47.8484	21.2818	24.6768	22.632	23.8196	25.3229	21.6741	22.0708	23.6298	YCL016C
YCL014W	chrIII	96177	101266		46.8236	52.346	22.8638	26.1849	21.1527	26.8159	30.5261	22.7679	24.0926	26.3942	YCL014W
YCL012C	chrIII	101188	101871		41.3562	48.4762	17.4642	18.6251	21.9419	31.0916	29.1317	22.8566	25.0407	28.3662	YCL012C
YCL009C	chrIII	104537	105580		88.8684	84.7993	42.666	41.9521	55.6577	54.7312	44.6512	49.438	46.4049	42.891	YCL009C
YCL008C	chrIII	105562	106863		58.5601	60.4652	28.0112	30.4871	36.395	39.8007	33.6127	32.6823	32.9873	29.9085	YCL008C
YCL005W-A	chrIII	106997	107521		323.435	350.426	146.842	156.236	177.653	159.407	170.933	177.158	177.676	182.117	YCL005W-A
YCL005W	chrIII	107966	108929		59.502	63.8467	25.0926	28.9376	37.1017	38.3006	33.0878	34.694	31.5507	35.4808	YCL005W
YCL004W	chrIII	109026	110709		44.1442	47.2737	19.6022	22.1979	19.6652	24.3301	24.4611	20.564	22.0047	23.4511	YCL004W
YCL002C	chrIII	110548	111711		81.8341	79.0349	39.214	40.9213	36.9926	39.3383	39.7962	40.346	44.1374	41.889	YCL002C
YCL001W	chrIII	111837	112530		92.6075	105.497	51.3453	54.4833	52.6655	44.596	46.4667	53.0652	54.2915	56.2562	YCL001W
YCR002C	chrIII	117303	118402		87.3375	88.7003	42.9217	46.4622	39.8859	46.0165	47.1328	40.611	43.9973	46.1452	YCR002C
YCR003W	chrIII	118597	119263		88.1196	87.8646	43.7561	45.4666	41.1389	45.8208	48.2911	42.5037	45.3102	48.3951	YCR003W
YCR004C	chrIII	119476	120559		58.9241	70.0369	23.6112	29.1451	33.8932	43.2448	47.0885	32.8047	37.9172	41.9004	YCR004C
YCR008W	chrIII	128026	130558		75.3341	74.919	39.0075	40.2302	34.4883	39.4243	39.6033	37.2735	37.9465	38.0039	YCR008W
YCR009C	chrIII	130641	131622		97.1364	108.298	50.9091	56.8051	48.6991	61.5085	63.7104	47.1966	53.5378	55.6366	YCR009C
YCR011C	chrIII	133665	137076		52.8025	62.882	20.3765	23.223	23.6389	36.7882	36.6798	23.6022	29.0098	29.4684	YCR011C
YCR012W	chrIII	137663	139163		891.868	885.255	384.354	353.758	527.466	533.273	466.669	454.296	584.664	419.18	YCR012W
YCR015C	chrIII	141141	142545		173.014	177.471	74.1648	78.0288	84.0585	63.76	76.8589	87.9136	84.9278	92.9604	YCR015C
YCR016W	chrIII	143603	144664		102.874	112.51	71.1441	80.1238	47.072	49.1426	52.3908	54.0094	57.5507	56.7283	YCR016W
YCR017C	chrIII	144569	147700		47.3352	52.2211	21.308	23.4731	20.6439	40.6419	33.119	22.7012	25.0716	23.4515	YCR017C
YCR019W	chrIII	152688	154044		27.4127	28.8707	14.2659	17.0085	14.3465	17.2129	17.6195	14.436	15.1717	16.6987	YCR019W
YCR020C	chrIII	153934	154699		19.981	24.7648	11.1861	11.3712	8.58817	17.2971	14.7705	10.1732	12.8151	12.0628	YCR020C
YCR020C-A	chrIII	154665	155113		61.5865	62.5865	26.9969	30.0032	32.1983	35.584	33.7191	31.5558	31.5753	35.0375	YCR020C-A
YCR020W-B	chrIII	155261	156052		90.93	89.2678	50.8499	53.8401	47.4417	50.4545	46.4629	50.8771	57.2434	56.4981	YCR020W-B
YCR021C	chrIII	155942	157221		23.6914	27.3814	14.5303	14.84	12.3225	24.9511	19.0992	11.7186	12.7128	13.4467	YCR021C
YCR023C	chrIII	158282	160472		60.0017	67.9709	27.2867	31.4502	28.0497	43.4615	42.3604	29.8496	32.63	35.1109	YCR023C
YCR024C	chrIII	160655	162240		43.2965	49.3928	18.7334	22.1203	19.2839	26.314	25.4213	20.397	19.9635	22.419	YCR024C
YCR024C-A	chrIII	162406	163301		726.553	773.06	401.867	421.78	384.817	204.064	282.684	409.698	306.742	389.558	YCR024C-A
YCR024C-B	chrIII	162418	163301		735.325	782.089	406.724	426.861	389.577	206.506	286.054	414.714	310.372	394.308	YCR024C-B
YCR026C	chrIII	163869	166424		71.5221	75.668	37.7179	41.7839	35.6431	39.1307	38.3628	37.6652	35.1998	39.0779	YCR026C
YCR027C	chrIII	166806	168207		44.0236	47.5232	22.5256	24.7347	23.2985	22.7802	23.3311	23.7036	24.4753	26.0445	YCR027C
YCR028C	chrIII	170158	172541		52.2034	49.6876	25.6254	25.0383	22.7206	33.3496	27.4931	25.6277	26.287	24.2239	YCR028C
YCR028C-A	chrIII	172756	173526		88.9484	83.7698	40.3229	41.9173	49.2764	44.2096	41.6046	51.2094	50.3361	47.2559	YCR028C-A
YCR030C	chrIII	173666	176536		49.114	58.7113	21.0539	23.7386	24.9483	34.2097	37.8661	24.5567	27.2205	30.4103	YCR030C
YCR031C	chrIII	177397	178255	2_RPG	665.434	327.085	372.365	174.798	376.305	156.452	115.748	365.976	238.332	167.739	YCR031C
YCR032W	chrIII	179452	186155		29.7867	30.3833	12.9761	13.9721	12.3643	16.4136	18.5986	13.935	13.9975	15.5805	YCR032W
YCR033W	chrIII	186266	190277		91.1896	97.0382	52.7251	55.7432	43.4468	47.02	50.977	45.7386	48.0822	47.4529	YCR033W
YCR034W	chrIII	190565	191804		130.615	124.904	65.7145	62.3495	63.4968	53.111	51.8403	65.6077	63.6781	64.3222	YCR034W
YCR035C	chrIII	191639	193049		118.164	128.978	78.99	92.6931	60.9387	63.8542	68.6189	65.2815	66.9415	73.2794	YCR035C
YCR036W	chrIII	193244	194380		96.7231	120.133	63.6824	78.7581	64.0295	66.8716	75.9862	64.6098	64.5685	81.4851	YCR036W
YCR037C	chrIII	194366	197228		76.6715	85.9521	28.8407	34.9157	28.2323	38.4836	40.9452	29.4949	31.5893	34.9943	YCR037C
YCR038C	chrIII	197549	199549		29.7461	34.5632	10.2115	10.8747	10.7819	14.4398	15.4025	11.8892	11.6922	14.1566	YCR038C
YCR039C	chrIII	199494	200189		67.1536	65.2013	37.2539	38.132	18.4098	19.611	20.3923	19.8004	22.5656	23.0596	YCR039C
YCR042C	chrIII	201155	205419		60.2235	61.4629	29.4249	32.0603	27.8607	31.4742	32.4876	29.429	30.2483	30.5188	YCR042C
YCR043C	chrIII	206093	206702		114.387	131.102	60.1794	66.7117	63.2151	51.0819	58.081	60.379	66.3116	78.5396	YCR043C
YCR044C	chrIII	206778	207965		91.9291	96.7285	39.3072	42.2701	45.9289	46.7978	45.2311	44.2882	45.0171	49.8692	YCR044C
YCR046C	chrIII	209803	210469		53.0579	61.42	30.243	33.0358	42.2641	43.2172	37.9201	37.9727	36.2461	41.3993	YCR046C
YCR047C	chrIII	210570	211633		67.6503	67.9968	39.9333	45.6226	38.3529	40.9932	32.4692	37.1275	37.1044	34.1029	YCR047C
YCR048W	chrIII	211877	213957		33.7534	41.668	15.2724	17.4318	20.4505	27.9174	22.9084	17.6311	19.0488	17.9911	YCR048W
YCR051W	chrIII	214043	214873		82.6032	91.2543	42.9923	53.1422	48.0304	56.7818	49.7609	44.1706	49.2079	50.0786	YCR051W
YCR052W	chrIII	214929	216656		72.2792	78.3695	38.7556	44.2274	41.6385	43.5345	41.988	41.5709	39.7714	43.9929	YCR052W
YCR053W	chrIII	216592	218398		167.886	172.646	96.4483	99.5729	81.1945	79.4072	80.1176	85.3813	84.0351	85.3009	YCR053W
YCR054C	chrIII	218307	220170		49.036	48.1247	28.518	28.8697	21.6365	24.7209	24.0851	25.2629	27.4184	25.6708	YCR054C
YCR057C	chrIII	220342	223301	1_RiBi	122.685	115.902	76.1057	81.3185	54.7142	58.8883	53.5842	60.5735	58.4925	55.8555	YCR057C
YCR059C	chrIII	223271	224248		64.7417	64.2414	30.4958	34.5155	40.007	40.7684	33.3508	37.5463	38.7357	35.5274	YCR059C
YCR060W	chrIII	224373	224858		42.83	41.888	20.2001	19.7335	24.6782	22.3075	21.5644	23.8807	23.3642	25.1455	YCR060W
YCR061W	chrIII	225504	227816		35.6662	42.716	11.1122	12.5696	16.1642	24.7745	22.4091	13.4053	16.257	19.2976	YCR061W
YCR066W	chrIII	231449	233127		43.284	44.8874	21.5772	24.1753	18.5624	24.8764	23.9548	19.992	21.591	22.2953	YCR066W
YCR067C	chrIII	233052	236440		57.0947	60.386	26.7737	28.3034	25.8527	33.6738	31.7138	27.2771	28.0627	26.6617	YCR067C
YCR069W	chrIII	238889	240108		50.5206	58.8038	20.8438	24.8953	23.8917	34.0533	34.6515	24.5843	25.7918	28.1375	YCR069W
YCR071C	chrIII	240031	240591		71.382	81.8116	32.3781	35.9319	39.8002	39.3185	43.4435	38.6425	39.923	43.2714	YCR071C
YCR072C	chrIII	240727	242385	1_RiBi	104.264	104.945	66.2122	77.7059	48.8389	54.7253	51.2993	54.5571	53.5152	53.7179	YCR072C
YCR073C	chrIII	242519	246647		43.8253	56.9871	19.7953	27.4859	17.7277	26.3244	26.8681	19.1081	20.9893	23.0538	YCR073C
YCR073W-A	chrIII	246925	248024	3_MSN2	33.1897	41.9587	17.6878	18.4016	23.0723	31.1881	30.5914	19.4166	21.8152	23.482	YCR073W-A
YCR075C	chrIII	247887	248844		24.2202	27.9165	9.18994	12.9327	13.4044	15.1565	16.1665	13.2512	12.576	15.912	YCR075C
YCR075W-A	chrIII	248940	249284		34.0474	39.7301	16.2538	16.8117	21.1622	20.5851	24.1475	17.6333	21.7591	23.5024	YCR075W-A
YCR076C	chrIII	249017	250069		29.0701	33.147	13.4291	15.909	18.3479	18.8595	19.645	15.3025	18.141	18.6926	YCR076C
YCR077C	chrIII	250111	252669		74.9577	81.1192	40.9086	44.0863	37.6269	38.6569	42.2432	38.3091	39.9217	40.9734	YCR077C
YCR079W	chrIII	252792	254284		50.297	66.857	21.0693	27.0154	26.6382	29.0251	31.2406	24.1908	26.8902	28.187	YCR079W
YCR082W	chrIII	258702	259378		102.015	91.5686	47.3414	44.5706	53.5084	55.6073	45.5774	51.8014	58.1624	50.3206	YCR082W
YCR083W	chrIII	259542	260016	3_MSN2	28.778	36.2403	11.486	13.3043	17.1298	20.3896	19.7451	13.9916	16.2185	20.2398	YCR083W
YCR084C	chrIII	260252	262713		126.744	143.635	68.9743	75.5274	64.067	61.2239	67.1971	62.9191	60.631	62.0477	YCR084C
YCR086W	chrIII	263313	263993		66.6515	76.6766	37.7485	40.4494	40.0137	34.2068	33.8447	36.8054	37.8728	37.5231	YCR086W
YCR087C-A	chrIII	263801	264512		106.648	116.745	69.9344	81.9306	59.6334	51.6206	52.9085	60.8057	58.8452	62.7826	YCR087C-A
YCR088W	chrIII	265021	266978		70.0584	83.759	30.8032	37.296	31.2486	34.1073	38.8617	30.495	31.475	36.2854	YCR088W
YCR089W	chrIII	267137	272267		28.956	29.7784	13.5588	14.1711	12.8205	19.9554	17.8756	13.6713	13.8325	13.0662	YCR089W
YCR090C	chrIII	272247	272909		68.3758	74.2645	34.7058	36.1858	33.1042	27.9553	33.1949	31.8123	33.7711	37.747	YCR090C
YCR091W	chrIII	274340	276685		18.1781	21.751	7.34384	8.54452	7.16909	10.0829	13.1679	7.34171	9.26894	10.53	YCR091W
YCR092C	chrIII	276607	279855		39.3861	40.8112	19.302	20.9728	17.9559	22.8595	23.1725	19.3824	20.2869	19.3585	YCR092C
YCR093W	chrIII	280082	286541		134.614	132.407	67.3303	68.9343	56.084	62.0714	71.1447	60.7361	65.1314	61.2842	YCR093W
YCR094W	chrIII	286698	288213		39.6	42.4149	18.8417	21.1194	18.928	19.4383	21.431	19.1151	20.6893	20.6979	YCR094W
YCR095C	chrIII	288109	289314		48.682	48.8866	25.2775	26.4936	21.447	27.1603	26.6534	23.6732	27.3378	25.1391	YCR095C
YCR096C	chrIII	293033	293713		52.2006	52.0517	30.6539	31.6275	22.2092	23.6471	24.1834	23.746	26.5373	26.7231	YCR096C
YCR097W	chrIII	293811	294340		1.88106	1.72108	1.35616	1.32718	43.2845	41.4285	53.1245	46.886	44.9139	59.7669	YCR097W
YCR098C	chrIII	297041	298811		28.0603	42.1079	9.1416	12.4034	9.06195	13.0134	15.9949	9.24423	9.8042	12.8207	YCR098C
YCR102C	chrIII	304283	305536		16.0338	18.1205	6.21539	7.47368	9.4771	13.3568	10.3654	9.02459	10.0129	9.87105	YCR102C
YDL246C	chrIV	8612	10050		13.0607	15.379	6.85476	8.40755	9.75031	14.49	11.5579	8.19978	9.29695	9.63248	YDL246C
YDL245C	chrIV	11541	13541		11.5348	15.1128	6.45446	7.90916	5.23118	7.52954	9.64547	5.31574	6.34567	7.92469	YDL245C
YDL241W	chrIV	20520	21299		27.3318	28.6089	14.0787	15.347	12.5483	23.6892	17.5571	13.8635	22.0074	15.1958	YDL241W
YDL240W	chrIV	22650	25909		53.0654	55.0535	24.9921	27.2682	22.1984	31.5836	32.8786	22.9718	25.6365	25.3876	YDL240W
YDL239C	chrIV	26371	28919		25.583	27.6234	11.7982	12.9436	9.46982	13.2296	18.635	11.1267	13.2679	14.6886	YDL239C
YDL238C	chrIV	28951	30494		28.8262	40.6933	10.9633	13.7613	13.3315	17.5159	20.8032	12.8322	14.0572	19.148	YDL238C
YDL237W	chrIV	30608	31910		45.3501	52.9997	18.974	19.9533	20.4872	23.6201	25.586	20.3415	23.0911	23.5435	YDL237W
YDL236W	chrIV	32228	33417		90.828	98.8424	48.0148	52.6573	47.2471	42.3228	47.9514	45.1826	45.4582	51.5594	YDL236W
YDL235C	chrIV	33286	34040		114.703	136.495	54.1787	72.2749	51.8517	50.1786	64.3093	53.0678	62.5695	73.4092	YDL235C
YDL234C	chrIV	34145	36619		53.0053	63.57	26.3008	31.8148	23.7724	30.1937	33.6767	26.3242	27.6153	31.3719	YDL234C
YDL233W	chrIV	36774	38342		29.674	34.1503	13.7174	18.0801	14.9298	21.5949	20.7125	14.6586	14.659	17.2401	YDL233W
YDL232W	chrIV	38457	38882		117.812	122.402	50.3997	57.7683	64.3473	54.5065	62.3762	60.0011	69.6473	72.5874	YDL232W
YDL231C	chrIV	38777	42354		77.7248	75.2965	35.8359	38.9527	32.6302	45.4152	44.0658	33.797	36.6268	34.6444	YDL231C
YDL230W	chrIV	42646	43767		21.5329	24.6169	8.46918	11.1352	13.3146	19.1765	18.1269	12.9727	13.7981	15.3586	YDL230W
YDL229W	chrIV	44034	46014		582.946	476.121	343.508	309.844	297.525	204.054	222.806	288.2	258.606	253.186	YDL229W
YDL227C	chrIV	46311	48069		51.5323	58.8208	38.9805	40.6279	40.8283	31.9419	44.9899	40.4895	41.1389	38.611	YDL227C
YDL226C	chrIV	50861	52203		80.7859	83.3546	40.9145	44.9067	40.9672	46.3516	46.6902	40.6122	43.6944	41.9331	YDL226C
YDL225W	chrIV	52394	54244		64.6096	67.6842	31.0774	34.7421	26.0282	36.563	38.3328	27.6107	31.4577	31.4637	YDL225W
YDL224C	chrIV	54154	56718		92.9126	96.4363	41.7443	44.3258	38.0705	48.8227	51.9116	40.0352	43.8527	45.3079	YDL224C
YDL223C	chrIV	57135	60489	3_MSN2	24.9831	27.1395	11.3913	12.6398	10.7711	15.4569	16.5623	11.0812	13.2491	14.6519	YDL223C
YDL222C	chrIV	60647	61908		11.2987	12.7891	4.89975	5.88416	6.42702	11.9291	11.5767	5.46173	7.22314	8.09923	YDL222C
YDL220C	chrIV	62097	65037		26.3033	29.5258	11.8557	13.5191	12.5072	18.6239	17.7591	12.2517	13.5906	13.6067	YDL220C
YDL219W	chrIV	65187	65826		59.7565	62.145	27.2456	28.5091	27.7535	27.9995	29.8522	27.7244	33.6948	33.0527	YDL219W
YDL218W	chrIV	66486	67491		12.3565	14.9497	5.76761	5.79954	6.01597	18.2183	15.0585	5.07323	8.30034	6.73054	YDL218W
YDL217C	chrIV	67587	68777		62.7505	60.5378	30.6747	30.4456	27.0641	29.8532	29.6129	27.7385	30.2977	28.3886	YDL217C
YDL216C	chrIV	68679	70328		39.3836	42.6156	19.411	19.6227	20.8924	20.1	21.8438	21.5706	22.491	23.8852	YDL216C
YDL215C	chrIV	70486	73918		80.2432	87.2829	37.6994	40.5055	35.1813	40.899	48.8776	38.0201	43.0722	43.481	YDL215C
YDL214C	chrIV	74404	76650		20.4809	30.0449	6.63359	9.11122	6.24899	21.0034	19.5592	6.09058	10.2151	10.4277	YDL214C
YDL213C	chrIV	77165	78005	1_RiBi	106.822	124.614	70.0098	85.2323	50.4075	47.7183	55.9949	51.9372	55.0085	62.9635	YDL213C
YDL212W	chrIV	78359	79203		114.78	123.118	56.9935	66.2049	57.9075	49.6436	59.7838	54.3793	61.8152	64.7833	YDL212W
YDL211C	chrIV	79226	80490		54.7664	62.9238	25.8794	30.3476	24.1744	25.2153	29.4923	24.0966	24.5366	29.5753	YDL211C
YDL209C	chrIV	86074	87267		60.5374	66.9269	35.6962	41.1804	28.3096	28.4771	31.9897	29.2585	31.3926	33.5912	YDL209C
YDL208W	chrIV	87467	88076	1_RiBi	305.95	316.193	171.918	187.764	162.663	130.776	154.556	161.541	159.16	171.882	YDL208W
YDL207W	chrIV	88209	89939		61.8155	68.9086	34.4369	38.7677	30.19	30.9532	34.2193	31.1724	32.8824	32.8157	YDL207W
YDL206W	chrIV	90026	92480		21.5093	28.2771	9.49433	11.4156	10.1253	15.6377	17.6055	10.4308	12.7907	15.1776	YDL206W
YDL205C	chrIV	92466	93928		83.1056	89.4956	42.8671	49.4893	39.1106	36.4626	44.1512	40.1755	42.7626	46.2633	YDL205C
YDL204W	chrIV	94591	95788	3_MSN2	28.5935	33.9338	13.0679	14.7412	13.8265	24.3302	26.3396	13.0018	16.0807	18.2957	YDL204W
YDL203C	chrIV	96045	98151		44.0794	48.388	20.8637	21.8813	19.8033	22.6529	22.5463	19.279	20.8332	21.12	YDL203C
YDL202W	chrIV	98412	99320		91.2573	89.8695	44.5094	45.4979	46.1595	42.6982	46.0219	48.4729	49.028	50.0914	YDL202W
YDL201W	chrIV	99457	100506	1_RiBi	88.251	93.9295	55.2904	64.9368	45.035	47.1461	47.1935	49.578	51.3249	52.8388	YDL201W
YDL200C	chrIV	100430	101102		40.8779	49.162	20.7319	23.084	19.4464	22.2796	24.3089	20.0771	21.8814	22.8887	YDL200C
YDL199C	chrIV	101237	103378		20.8218	25.4936	6.48678	8.08582	7.34216	11.0776	10.8319	7.3588	8.40564	9.78527	YDL199C
YDL198C	chrIV	103525	104667		68.4501	66.7435	30.6724	30.3415	32.7997	28.2236	24.7625	30.522	31.6591	28.6039	YDL198C
YDL197C	chrIV	104753	106872		52.4115	57.1875	22.9691	24.0932	27.529	32.8106	32.8704	26.8716	26.9846	26.7622	YDL197C
YDL195W	chrIV	107078	111173		98.6812	102.929	46.7705	49.4277	46.2932	54.3598	56.2947	46.7744	50.0232	48.3048	YDL195W
YDL194W	chrIV	111371	114402		14.9243	16.8586	7.72821	8.64249	7.85973	9.77129	10.5487	7.50993	8.88692	9.96374	YDL194W
YDL193W	chrIV	114555	116020		65.7824	73.1196	29.7005	31.6735	32.3558	36.4973	36.602	34.1914	35.7378	37.5864	YDL193W
YDL192W	chrIV	116277	117141		284.346	268.718	150.891	147.665	151.062	117.822	124.345	154.756	142.93	145.434	YDL192W
YDL191W	chrIV	117604	118618	2_RPG	545.542	232.594	326.587	139.582	285.823	102.192	78.5228	295.099	189.097	118.658	YDL191W
YDL190C	chrIV	118562	121786		55.6675	47.1058	26.1456	21.3492	25.3598	25.2442	23.9255	27.5773	24.694	23.1245	YDL190C
YDL189W	chrIV	121948	123684		59.6124	56.7495	29.1988	30.1397	27.1224	28.4554	28.1561	28.3805	29.4509	28.778	YDL189W
YDL188C	chrIV	123780	125179		48.7522	52.8258	19.9656	22.5818	22.7487	27.9554	28.5097	22.5367	23.524	24.8852	YDL188C
YDL186W	chrIV	125499	126504		66.9603	82.7722	32.0174	37.6537	30.7531	40.2415	40.1848	29.5384	34.901	37.3062	YDL186W
YDL185W	chrIV	126669	130132		145.829	139.745	67.3286	62.9608	64.5614	70.084	76.232	66.0477	64.9378	66.051	YDL185W
YDL184C	chrIV	130195	130563	2_RPG	1333.16	921.707	676.139	440.151	775.987	407.352	409.514	673.243	661.348	546.904	YDL184C
YDL183C	chrIV	130813	131912		25.255	22.5523	11.3945	9.1783	13.3941	19.549	15.2412	14.4255	12.8393	11.8853	YDL183C
YDL182W	chrIV	133390	134816		131.558	116.564	68.7352	63.253	84.6027	83.9831	70.4241	84.4227	81.2994	68.8431	YDL182W
YDL181W	chrIV	135015	135556		69.8205	83.9116	32.6964	43.4967	99.0494	103.757	103.922	74.3924	91.0156	99.2572	YDL181W
YDL180W	chrIV	135763	137656		49.2899	50.0055	23.9963	24.6346	23.939	32.799	27.25	24.8853	27.2123	27.4627	YDL180W
YDL179W	chrIV	138179	139287		127.081	146.065	66.5512	79.3144	64.8654	51.4581	63.2004	70.4484	62.453	75.1038	YDL179W
YDL178W	chrIV	139496	141188		60.5777	60.9876	26.743	29.3485	24.9379	34.2746	33.8009	27.1177	31.3661	31.5126	YDL178W
YDL177C	chrIV	141110	141815		49.0614	53.2491	24.4584	28.0062	27.2232	28.7134	30.5023	27.933	29.1228	29.3532	YDL177C
YDL176W	chrIV	141956	144334		36.4342	38.8285	20.1341	20.7882	16.9532	19.5684	20.5692	18.4612	18.7888	19.6948	YDL176W
YDL175C	chrIV	144305	145550		62.8725	61.4011	30.1821	30.569	30.1045	36.1797	34.1819	31.2992	32.0473	29.6744	YDL175C
YDL174C	chrIV	145732	147690		54.9068	60.8509	25.7279	25.6926	31.8283	42.1048	40.5237	30.6791	30.6425	32.5889	YDL174C
YDL173W	chrIV	148147	149114		69.3776	80.9797	34.6545	36.1108	39.8446	38.4312	39.0261	37.039	34.3677	38.2803	YDL173W
YDL171C	chrIV	149081	155928		108.171	115.564	52.7913	56.6534	47.9057	52.0275	61.2826	50.2068	54.04	55.7814	YDL171C
YDL170W	chrIV	156289	158071		33.6894	41.3532	16.5431	21.257	14.352	16.3463	17.7574	16.3229	16.236	17.8552	YDL170W
YDL169C	chrIV	157956	158775		8.31029	10.6265	2.79158	4.82171	4.28298	5.81915	6.10944	3.98353	3.57531	5.37247	YDL169C
YDL168W	chrIV	159503	160818		53.3778	59.0875	24.4129	27.6346	26.6317	38.1586	32.1733	24.4414	31.8631	32.8766	YDL168W
YDL167C	chrIV	160821	163212		93.7185	94.2022	55.3367	59.8369	41.5579	47.9316	49.1568	47.0956	48.8667	48.9361	YDL167C
YDL166C	chrIV	163370	164115		93.4158	92.798	51.044	57.6195	48.6249	49.7566	46.6673	49.0666	50.8759	55.1311	YDL166C
YDL165W	chrIV	164240	164901		71.4375	78.1613	35.5426	35.9857	38.0869	35.8783	37.453	38.5525	41.8724	43.4954	YDL165W
YDL164C	chrIV	164836	167266		52.268	57.239	29.9437	31.7745	24.9416	31.122	31.6275	25.8917	26.1765	26.5175	YDL164C
YDL161W	chrIV	167697	169201		100.738	125.887	53.1039	62.0291	50.4138	64.3964	67.3776	48.323	52.7142	53.3422	YDL161W
YDL160C-A	chrIV	169167	169635		58.2566	55.3027	25.6854	25.2135	30.4818	27.2526	29.3388	28.8785	31.1129	32.3154	YDL160C-A
YDL160C	chrIV	169787	172217		105.381	117.915	56.6584	65.7336	46.8031	59.3454	68.6725	48.7203	53.544	57.5239	YDL160C
YDL159W	chrIV	172434	174152		45.7587	47.2876	20.9943	23.6975	20.2165	29.7649	28.5079	21.4446	23.3948	25.3397	YDL159W
YDL157C	chrIV	174048	174657		63.0694	67.9274	28.025	32.3245	34.4217	36.1732	35.1506	34.6235	38.9443	36.3664	YDL157C
YDL156W	chrIV	174822	176563		50.0737	53.9432	26.1808	26.6598	24.7086	25.088	25.8915	23.3391	24.9253	24.698	YDL156W
YDL155W	chrIV	176632	178186		87.0167	91.628	43.7406	46.5835	37.4461	39.005	43.1248	39.6643	39.2678	41.2787	YDL155W
YDL154W	chrIV	178300	181117		25.7923	23.9633	10.449	10.8705	11.956	24.9818	23.7999	12.1057	15.4838	14.5965	YDL154W
YDL153C	chrIV	181135	183058	1_RiBi	102.828	102.877	80.9045	89.6367	43.7913	45.6626	48.3107	52.3376	52.1445	53.4429	YDL153C
YDL150W	chrIV	183231	184708	1_RiBi	88.4271	97.2093	56.6063	63.984	38.4783	41.1951	44.6083	41.9896	42.4674	46.2126	YDL150W
YDL149W	chrIV	184901	188062		19.1134	21.5429	8.54064	8.88867	8.25699	21.029	17.1685	8.86798	10.2482	10.3638	YDL149W
YDL148C	chrIV	187933	190652	1_RiBi	102.158	110.43	72.894	83.0129	42.6454	48.5692	54.6505	49.7695	51.7475	53.5676	YDL148C
YDL147W	chrIV	190864	192408		189.966	173.365	100.973	93.0851	84.3155	116.086	105.305	89.2426	111.088	90.384	YDL147W
YDL146W	chrIV	192593	194351		30.9716	38.262	12.8156	16.0163	12.2361	24.5284	21.7828	14.9156	18.2888	19.5768	YDL146W
YDL145C	chrIV	194407	198459		85.5108	90.2568	46.5576	48.4654	39.2201	41.6586	47.246	41.3362	43.1509	43.2737	YDL145C
YDL144C	chrIV	198569	199782		55.9936	63.7148	23.7944	26.8708	32.3068	36.1318	34.7094	29.4621	29.2663	32.7534	YDL144C
YDL143W	chrIV	199955	201682		142.434	143.555	74.9801	82.3363	64.3192	75.333	75.7185	65.4819	71.2826	70.9569	YDL143W
YDL142C	chrIV	201574	202634		44.4643	46.6453	21.3183	21.845	22.5979	25.1323	24.8194	23.3997	27.2986	26.1955	YDL142C
YDL141W	chrIV	202799	205375		39.525	39.2759	20.41	19.2852	18.4808	20.1102	20.4903	19.2481	20.4425	18.4226	YDL141W
YDL140C	chrIV	205255	211103		158.308	154.326	86.0961	85.963	67.7519	62.4478	69.838	73.4373	72.9118	70.8473	YDL140C
YDL139C	chrIV	211271	212088		32.482	35.7649	16.5336	18.3958	16.0813	14.7988	14.9187	16.8181	15.1575	17.6651	YDL139C
YDL138W	chrIV	213067	215788		57.7096	60.7119	26.285	25.5479	27.116	25.5823	25.4028	28.91	25.5064	25.8741	YDL138W
YDL137W	chrIV	215998	217228		166.297	153.58	73.9753	66.0375	83.7119	70.1881	70.8759	85.2243	77.8586	79.7739	YDL137W
YDL136W	chrIV	217566	218448	2_RPG	372.794	188.124	213.29	108.519	174.339	78.4137	71.7902	179.276	130.573	93.4495	YDL136W
YDL135C	chrIV	218425	219332		90.7872	83.7977	48.3833	41.2853	44.8865	34.2225	35.8875	47.9257	37.9595	43.6845	YDL135C
YDL134C	chrIV	219594	221307		87.0847	88.6206	42.0167	45.1229	43.564	39.9606	44.6261	46.3298	42.6872	47.8386	YDL134C
YDL133C-A	chrIV	221521	221818	2_RPG	1145.75	586.765	569.357	300.588	631.839	232.419	168.759	573.447	486.815	327.248	YDL133C-A
YDL133W	chrIV	222270	223837		77.7449	68.4189	38.3665	35.7543	36.042	29.2712	30.2867	37.9191	33.5797	33.3053	YDL133W
YDL132W	chrIV	223989	226941		49.385	47.7863	22.7121	20.7652	22.7593	28.9987	26.252	22.671	26.5681	22.5428	YDL132W
YDL131W	chrIV	227283	228819		112.518	89.4112	55.7466	45.334	60.0443	53.1625	43.1066	63.8853	56.083	46.8104	YDL131W
YDL130W-A	chrIV	229090	229595		28.2872	43.8942	8.65745	11.6175	24.2066	27.0998	36.032	23.6245	19.4095	29.7954	YDL130W-A
YDL130W	chrIV	229789	230622	2_RPG	722.418	318.694	428.495	186.085	436.325	149.872	113.451	426.397	267.412	182.98	YDL130W
YDL129W	chrIV	230874	231978		57.1221	59.3071	38.0084	39.6448	32.7214	36.5636	36.7194	35.2504	35.1777	35.7168	YDL129W
YDL128W	chrIV	232535	234056		99.1778	109.588	48.9208	55.7336	51.3531	55.24	57.6454	51.7186	53.264	57.8901	YDL128W
YDL127W	chrIV	234855	236025		99.5344	113.884	54.6614	63.0156	52.7703	48.9392	53.716	53.3456	49.7044	55.7941	YDL127W
YDL126C	chrIV	236084	238743		151.302	147.387	74.4017	68.1859	78.4135	95.3447	82.7074	74.0301	85.5193	70.5458	YDL126C
YDL125C	chrIV	238881	239815		145.764	170.601	65.5033	71.2786	96.6685	101.787	111.231	92.1607	95.5222	108.527	YDL125C
YDL124W	chrIV	240191	241270		94.0321	110.498	40.7389	39.1218	54.0847	56.781	61.5318	50.6121	54.128	56.3649	YDL124W
YDL123W	chrIV	241355	242323	3_MSN2	58.0603	75.4035	30.8198	35.6711	38.0058	44.9144	43.9325	38.2956	41.5159	45.4169	YDL123W
YDL122W	chrIV	242310	245069		107.559	112.721	65.2856	74.7228	46.8716	56.6758	56.2718	51.6206	52.6986	55.331	YDL122W
YDL121C	chrIV	244930	245626		81.326	81.9842	50.4892	54.9209	44.5874	46.8108	45.8407	50.6914	46.3474	48.3462	YDL121C
YDL120W	chrIV	245826	246603		70.2647	77.7177	33.6501	34.801	39.7939	43.5259	46.5874	39.9988	44.0126	45.4657	YDL120W
YDL119C	chrIV	246534	247783		41.5309	53.9118	17.276	20.3887	19.8173	21.2821	23.3747	18.9786	19.1661	25.1007	YDL119C
YDL117W	chrIV	248169	251374		84.7395	93.8774	44.486	52.9305	37.4382	33.8347	39.2185	39.7097	37.479	43.3558	YDL117W
YDL116W	chrIV	251498	253803		87.6588	83.6373	46.1949	46.8071	36.9115	38.0438	41.1134	40.3637	41.3323	41.0589	YDL116W
YDL115C	chrIV	253888	255174		50.2345	53.6652	30.296	28.813	26.2237	38.6128	34.8841	25.2626	33.2472	25.3597	YDL115C
YDL113C	chrIV	256518	258640		37.2425	46.2882	16.4754	19.9642	16.5305	23.4878	26.4474	17.2757	21.0555	22.6758	YDL113C
YDL112W	chrIV	258834	263245		53.527	49.5905	29.8657	32.2968	21.1018	36.437	29.9472	24.3517	26.6029	23.0961	YDL112W
YDL111C	chrIV	263306	264178		110.061	127.233	68.0973	78.1821	57.9369	63.2294	66.8807	58.3374	62.5693	71.2158	YDL111C
YDL110C	chrIV	264322	265020		60.6214	90.5451	24.1241	33.5649	34.3369	46.6451	59.6284	30.4337	36.1917	50.3542	YDL110C
YDL109C	chrIV	265106	267542		34.9544	39.9839	14.87	17.1666	16.6535	22.9486	21.1506	16.2837	16.7875	19.2475	YDL109C
YDL108W	chrIV	267674	268785		50.9801	55.1335	29.4989	29.2307	25.4842	29.8761	30.6771	27.1094	28.0612	30.6296	YDL108W
YDL107W	chrIV	268887	270130		48.9806	56.3102	23.9623	25.9499	24.4471	25.8687	28.0434	26.3215	27.4293	31.8677	YDL107W
YDL106C	chrIV	270221	271964		61.8327	69.8891	33.3481	35.4872	29.5615	35.3133	38.9979	30.6829	32.0071	32.0982	YDL106C
YDL105W	chrIV	272353	273644		50.0913	50.1262	22.9414	23.8699	20.8612	26.376	26.712	22.1754	22.0279	20.9329	YDL105W
YDL104C	chrIV	273608	274894		37.5355	40.5634	15.8995	16.1443	15.5761	19.542	17.2485	15.512	15.9035	15.6092	YDL104C
YDL103C	chrIV	275030	276653		35.2935	43.512	17.3705	18.5192	18.3168	22.5159	22.2153	17.6371	18.572	20.3057	YDL103C
YDL102W	chrIV	276777	280378		34.6861	35.8939	19.7865	20.8258	15.4952	20.7516	20.1616	16.9683	16.9041	16.7489	YDL102W
YDL101C	chrIV	280141	281908		43.4006	53.0247	20.1249	22.4363	18.7939	25.2306	26.8285	19.9789	21.1073	22.0522	YDL101C
YDL100C	chrIV	282029	283211		113.361	119.267	56.0845	58.001	60.3339	70.2315	65.9311	57.5374	60.7862	58.5361	YDL100C
YDL099W	chrIV	283302	284523		79.9876	86.0283	48.3704	50.724	40.0817	43.2517	44.3343	39.8594	44.9987	43.8663	YDL099W
YDL098C	chrIV	284441	285174		39.7525	37.9562	18.3867	19.8599	17.6528	20.9856	18.7705	19.099	22.1552	20.5701	YDL098C
YDL097C	chrIV	285305	286752		136.708	129.387	67.4276	61.4527	67.9075	84.9818	72.6078	67.4508	77.666	63.1157	YDL097C
YDL095W	chrIV	286978	289591		101.077	117.528	49.2661	54.8524	51.1007	60.1992	67.8176	49.7337	50.4204	51.977	YDL095W
YDL093W	chrIV	289860	292412		28.9452	32.1376	13.712	15.2224	13.5036	26.2951	24.8269	12.9968	15.3196	14.466	YDL093W
YDL092W	chrIV	292748	293359		118.45	127.52	60.6552	62.6536	57.0734	50.5843	59.065	59.722	61.5291	69.1821	YDL092W
YDL091C	chrIV	293297	294852		30.9157	38.0996	15.5859	16.4185	15.3111	23.585	24.063	15.363	19.0016	18.3837	YDL091C
YDL090C	chrIV	294986	296362		32.9003	32.8332	14.8999	16.7437	17.1838	23.0058	19.2448	15.267	17.0673	16.9928	YDL090C
YDL089W	chrIV	296520	298342		28.2403	31.3553	12.3601	13.8985	12.097	16.2429	17.7956	13.8841	14.8381	15.7681	YDL089W
YDL088C	chrIV	298262	300141		92.2445	95.8999	48.1608	50.7294	38.0741	47.0057	50.3157	42.3738	45.3035	46.0477	YDL088C
YDL086W	chrIV	301373	302295		102.091	115.362	41.0718	48.4557	53.1088	60.1034	67.7719	49.6435	51.4774	63.6376	YDL086W
YDL085C-A	chrIV	302416	302748		47.9035	58.1447	20.0885	20.6047	24.139	34.8504	29.258	22.8239	22.3041	28.6379	YDL085C-A
YDL085W	chrIV	303184	304873		27.5781	32.2322	11.8826	13.47	15.9181	25.5987	23.0267	14.8945	16.8181	17.1593	YDL085W
YDL084W	chrIV	305052	306688		162.385	165.381	83.6256	88.7747	77.9524	86.4587	84.9122	83.2514	88.7835	88.2131	YDL084W
YDL083C	chrIV	306804	307871	2_RPG	519.946	171.874	310.837	102.6	286.73	87.2167	52.3251	289.932	161.52	87.0551	YDL083C
YDL082W	chrIV	308385	309526	2_RPG	376.794	180.661	227.034	108.86	185.806	84.9663	75.9872	196.029	132.169	92.6443	YDL082W
YDL081C	chrIV	309692	310234	2_RPG	614.987	406.145	300.045	203.798	333.782	175.427	166.309	328.529	241.857	210.544	YDL081C
YDL080C	chrIV	310490	312665		59.2133	52.8528	26.1535	24.3581	29.3294	34.9034	30.5074	29.7229	28.3067	27.5595	YDL080C
YDL079C	chrIV	312830	314766	3_MSN2	23.7439	25.302	10.2403	10.8171	11.9136	20.4469	17.8469	11.8509	12.0672	13.7243	YDL079C
YDL078C	chrIV	315272	316459		42.6617	45.4391	19.9474	19.7807	22.6136	29.4567	29.5753	19.5556	22.1841	23.8778	YDL078C
YDL077C	chrIV	316868	320253		26.8613	24.1757	12.0701	11.0208	10.7926	10.9349	11.3852	11.296	9.8062	11.0449	YDL077C
YDL076C	chrIV	320461	321698		50.1089	42.7684	19.8833	16.9762	20.9649	23.1835	22.2884	20.9553	20.628	20.2442	YDL076C
YDL075W	chrIV	322194	323058	2_RPG	650.339	236.286	433.83	153.016	329.076	102.59	68.0831	363.753	210.31	110.186	YDL075W
YDL074C	chrIV	323952	326232		111.27	100.534	57.3862	58.0262	47.2959	57.2841	56.3104	52.1918	55.74	51.647	YDL074C
YDL073W	chrIV	326426	329623		45.7207	43.2017	21.9395	22.8178	18.87	23.2656	22.1788	20.817	22.6945	20.2554	YDL073W
YDL072C	chrIV	329759	330517		118.789	146.429	49.2491	57.1718	65.8731	93.7801	89.0349	60.1087	75.1826	76.9988	YDL072C
YDL070W	chrIV	330991	333099		229.378	232.257	120.594	122.088	110.293	115.615	106.405	116.467	121.771	108.671	YDL070W
YDL067C	chrIV	333981	334453		131.086	132.297	65.4718	69.9949	88.698	80.1469	81.4265	78.2962	86.1015	93.42	YDL067C
YDL066W	chrIV	334799	336264		64.6736	72.3257	30.6895	30.9124	38.1679	45.149	40.8895	32.8722	35.7886	35.9771	YDL066W
YDL065C	chrIV	336165	337317		72.5948	76.0179	40.4045	41.3569	37.0568	45.5276	38.4721	36.2871	38.4843	37.7537	YDL065C
YDL064W	chrIV	337443	338191		78.1066	79.4424	39.0958	43.1182	39.678	47.7862	45.9114	42.3351	45.2956	50.9457	YDL064W
YDL063C	chrIV	338114	340234		111.367	100.053	69.6119	77.7292	46.4831	49.5136	48.7456	55.3317	53.3883	54.8641	YDL063C
YDL061C	chrIV	340459	341219	2_RPG	465.926	187.52	284.722	107.777	252.212	105.396	77.8591	265.319	167.314	100.623	YDL061C
YDL060W	chrIV	341598	344105	1_RiBi	119.889	104.579	75.5338	72.1822	52.5056	49.5255	49.8219	59.2186	50.8888	51.7627	YDL060W
YDL059C	chrIV	343976	345065		25.0374	28.8345	13.1348	13.382	15.5029	16.9	15.7217	14.4447	15.161	15.8648	YDL059C
YDL058W	chrIV	345609	351182		49.0802	48.1896	25.1103	26.236	20.8705	24.6351	25.063	22.7177	22.863	22.3943	YDL058W
YDL057W	chrIV	351398	352462		27.9484	30.4133	14.504	15.5161	14.7592	17.5285	18.9439	13.9435	13.2997	17.003	YDL057W
YDL056W	chrIV	352761	355470		65.5626	73.151	32.2846	35.6423	30.1315	36.4518	38.1428	32.4036	31.7709	34.3022	YDL056W
YDL055C	chrIV	355430	356907		708.39	814.323	372.474	426.65	427.898	354.427	406.603	414.149	365.827	430.233	YDL055C
YDL054C	chrIV	359736	361373		22.908	24.386	10.2664	11.1762	10.3416	16.9806	13.794	11.306	12.8856	12.344	YDL054C
YDL053C	chrIV	361509	362365		75.5074	81.3859	38.1457	44.1623	34.0578	41.6291	42.0606	34.3136	36.3174	39.9477	YDL053C
YDL052C	chrIV	362614	363634		107.033	130.214	52.9498	59.2019	58.7876	78.5241	73.6297	57.9297	59.1051	66.936	YDL052C
YDL051W	chrIV	363902	364882		204.901	182.625	127.008	126.358	104.309	108.792	103.105	111.037	112.823	107.407	YDL051W
YDL049C	chrIV	364978	366002		49.7327	53.7146	20.9204	25.4242	29.6152	46.2969	34.7664	29.4088	28.6484	30.7018	YDL049C
YDL048C	chrIV	366622	368319	1_RiBi	40.6976	51.8565	21.1779	28.7865	24.9514	36.7859	33.1603	24.8378	25.677	32.5855	YDL048C
YDL047W	chrIV	369526	371010		101.945	106.085	60.0917	61.2837	55.172	64.856	60.8627	54.9666	54.821	53.9324	YDL047W
YDL046W	chrIV	371144	372039		119.546	140.306	52.6011	57.1293	63.9425	87.4225	87.8144	58.9493	68.0493	73.6344	YDL046W
YDL045W-A	chrIV	372198	372654		98.1091	108.78	46.9602	52.159	59.758	62.1789	65.0477	56.6189	56.119	65.6574	YDL045W-A
YDL045C	chrIV	372628	373772		42.8421	44.6594	20.7864	25.2727	19.9534	24.2217	26.8137	20.866	22.4346	24.6312	YDL045C
YDL044C	chrIV	373885	375313		50.0597	51.2741	25.5848	26.5872	21.8734	28.9099	26.1502	24.974	24.3539	23.2957	YDL044C
YDL042C	chrIV	376594	378504		29.8957	26.8364	25.8321	22.3329	19.607	8.95327	7.61326	20.2779	11.0792	11.111	YDL042C
YDL040C	chrIV	378761	381496		65.9165	66.0068	33.1896	34.4818	28.171	31.0058	31.8775	29.4252	30.221	29.6568	YDL040C
YDL036C	chrIV	387374	388908		76.68	74.6714	41.5444	44.3305	32.0968	40.278	35.115	35.826	37.4473	34.5785	YDL036C
YDL035C	chrIV	389038	392339		66.6978	70.7468	29.7143	33.4748	25.2375	31.4879	32.864	28.4357	28.1307	28.9591	YDL035C
YDL033C	chrIV	392477	393957		78.5432	88.7948	38.1982	41.9185	41.0382	55.2373	45.6276	42.1557	43.6331	42.7022	YDL033C
YDL031W	chrIV	394154	397292	1_RiBi	83.7512	84.9366	51.003	57.7579	35.1011	44.2088	43.3104	40.242	41.345	40.938	YDL031W
YDL030W	chrIV	397456	399218		46.5468	46.5758	25.6345	27.5598	22.6861	26.9048	25.8087	24.6237	25.5929	25.7165	YDL030W
YDL029W	chrIV	399305	400766		87.6474	106.361	44.1786	49.6526	42.553	55.0101	60.019	41.5033	46.4369	55.3558	YDL029W
YDL028C	chrIV	400850	403465		55.4604	61.2507	29.9017	31.7176	25.5854	32.6318	34.4265	27.6308	30.1443	31.3138	YDL028C
YDL027C	chrIV	403528	405001		31.2423	37.6669	11.6434	14.4422	14.9784	19.0356	21.0717	15.3994	16.3799	20.6065	YDL027C
YDL025C	chrIV	405144	407414		37.2581	43.2962	15.3563	17.5506	17.7407	24.9282	25.0025	17.5389	20.5427	21.2296	YDL025C
YDL022W	chrIV	411749	413133		70.3623	92.4556	37.0373	33.0591	77.0151	122.628	112.887	63.6345	73.7241	78.7475	YDL022W
YDL021W	chrIV	413927	414952		30.8064	39.4761	12.3995	15.5145	17.5224	22.6003	26.1108	17.5903	21.0107	24.0388	YDL021W
YDL020C	chrIV	414965	416959		206.643	181.145	67.1365	57.3806	81.6894	281.582	162.797	75.9355	116.527	69.4942	YDL020C
YDL019C	chrIV	417522	421725		36.9979	43.0041	14.0906	15.7684	17.2718	26.7294	27.628	17.1962	20.7978	22.3023	YDL019C
YDL018C	chrIV	422644	423581		50.1397	56.9155	24.3734	24.1438	24.7701	28.0376	27.7022	24.2107	23.9506	26.6538	YDL018C
YDL017W	chrIV	424098	425795		36.7801	39.3313	18.0192	20.0634	17.621	19.5247	19.2968	18.1016	18.601	18.8848	YDL017W
YDL015C	chrIV	425775	426985		125.705	133.734	65.0035	70.9432	58.592	60.2626	67.6049	62.189	69.6362	73.8697	YDL015C
YDL014W	chrIV	427213	428562	1_RiBi	335.036	353.758	196.652	225.876	162.833	135.82	147.736	164.354	152.407	169.069	YDL014W
YDL013W	chrIV	428928	431034		51.3392	56.1531	30.2048	29.947	26.1342	29.5433	28.1121	26.674	26.0013	27.204	YDL013W
YDL012C	chrIV	430954	431539		100.154	110.57	53.687	60.8311	53.7432	61.4571	59.0905	53.159	57.2065	56.1057	YDL012C
YDL010W	chrIV	432284	433303		60.9459	62.9975	29.3402	30.9965	29.4715	32.6478	30.0963	28.9901	31.1399	31.4297	YDL010W
YDL008W	chrIV	433465	434134		126.611	136.593	60.8396	67.1794	65.5875	62.2231	63.4154	64.9035	65.502	69.4741	YDL008W
YDL007W	chrIV	437998	439443		134.201	123.015	68.4429	63.6664	61.9014	87.4058	70.4246	65.7171	77.172	60.6524	YDL007W
YDL006W	chrIV	439586	440870		66.9848	71.5849	32.7482	34.9626	31.7322	40.405	37.6745	33.3918	37.0748	37.2188	YDL006W
YDL005C	chrIV	440782	442369		71.6394	75.9335	38.348	39.5552	34.4951	40.6444	41.2566	35.9817	39.0303	38.2447	YDL005C
YDL004W	chrIV	442956	443710	3_MSN2	108.993	116.048	55.6036	58.5327	74.74	72.7929	75.3018	65.8908	71.7639	74.7248	YDL004W
YDL003W	chrIV	444557	446500		118.098	134.281	73.3223	77.2912	69.5297	69.4553	72.6532	69.3806	64.0726	65.6551	YDL003W
YDL002C	chrIV	446679	447684		78.3483	85.474	46.347	45.9961	39.3179	40.4394	41.835	41.6621	44.7765	44.7008	YDL002C
YDL001W	chrIV	447902	449393		55.224	55.9379	27.0594	29.3904	25.5544	29.1241	28.9635	25.2486	27.6201	27.1284	YDL001W
YDR001C	chrIV	450106	452742		62.4537	90.1172	28.2029	37.6727	28.8513	48.3828	67.2717	27.5347	33.7765	45.6388	YDR001C
YDR002W	chrIV	452963	453835		188.212	199.546	120.049	136.356	103.957	87.2933	97.8244	106.729	107.724	115.41	YDR002W
YDR003W	chrIV	454075	454819		81.8037	94.4856	31.2689	38.1052	38.8634	51.615	48.9759	40.1877	44.404	48.2286	YDR003W
YDR004W	chrIV	455200	456811		78.0591	74.4083	33.1872	34.8681	35.9458	43.3751	39.7031	35.9505	38.2742	37.9005	YDR004W
YDR005C	chrIV	456666	458303		73.1499	77.4098	31.9032	34.4454	31.7253	34.9485	36.6782	35.4383	37.1739	39.5601	YDR005C
YDR006C	chrIV	458452	461396		100.654	102.951	54.2952	61.8926	44.497	47.4783	52.3165	48.6496	52.4047	49.773	YDR006C
YDR007W	chrIV	461609	462656		195.863	219.793	88.4699	99.7658	115.588	126.906	123.748	112.433	117.889	124.209	YDR007W
YDR009W	chrIV	463279	465550		51.1595	47.5944	22.6355	23.8008	29.5209	22.8863	19.3624	28.8062	22.8903	23.5073	YDR009W
YDR011W	chrIV	465578	470605		340.62	298.408	233.236	204.47	228.682	178.278	161.511	224.628	195.009	161.474	YDR011W
YDR012W	chrIV	471803	473020	2_RPG	587.832	567.181	319.391	336.193	340.97	236.635	266.361	299.759	287.012	314.915	YDR012W
YDR013W	chrIV	473139	473872		87.2592	88.4484	40.4354	41.9069	41.8594	43.7233	43.166	44.1739	43.5014	45.6532	YDR013W
YDR016C	chrIV	478352	478792		63.2342	67.7684	23.6715	27.6786	32.9468	32.5353	37.1381	31.8252	33.4645	39.4545	YDR016C
YDR017C	chrIV	478943	482279		85.7433	88.6191	45.7495	43.8872	39.332	45.2256	44.4291	41.9045	42.1518	40.6245	YDR017C
YDR019C	chrIV	484005	485414		62.5635	88.0672	19.9919	26.235	19.9916	36.0853	33.2652	22.8589	27.2186	35.2225	YDR019C
YDR020C	chrIV	485451	486563		73.3515	74.2692	34.632	36.3612	32.0668	37.0753	35.4054	35.7766	38.2988	39.3683	YDR020C
YDR021W	chrIV	486695	488055	1_RiBi	63.2593	62.5613	43.3439	48.2118	27.4807	29.5468	29.7878	32.1613	35.3281	32.3782	YDR021W
YDR022C	chrIV	487965	488668		35.5811	38.9028	15.8081	16.7868	17.0409	22.2564	17.8866	17.6246	18.1742	18.6893	YDR022C
YDR023W	chrIV	489432	491053	1_RiBi	210.763	184.068	114.655	107.224	88.9312	68.9555	78.1067	95.3396	84.6743	87.0174	YDR023W
YDR025W	chrIV	491449	492413	2_RPG	643.614	246.136	403.393	147.797	376.565	117.301	75.0058	368.961	224.671	125.002	YDR025W
YDR026C	chrIV	492469	494416		69.1774	65.0778	34.6341	33.6229	31.2079	30.1698	30.8146	33.7631	28.8634	29.494	YDR026C
YDR027C	chrIV	494574	497447		49.2061	51.1129	23.3499	22.9095	22.0709	33.615	32.3013	23.3218	27.3204	24.1175	YDR027C
YDR028C	chrIV	497555	501379		79.8512	91.9043	40.0272	45.504	34.6223	42.2784	48.421	36.9626	38.8703	42.1221	YDR028C
YDR030C	chrIV	501638	503279		46.3519	51.472	23.7009	24.8293	26.7146	30.8611	31.6747	27.1028	29.8532	29.9212	YDR030C
YDR031W	chrIV	503451	504011		25.5814	32.6937	13.9917	12.1269	16.4052	21.5882	24.7967	15.1476	19.9311	21.7153	YDR031W
YDR032C	chrIV	503944	504762		37.8873	54.6022	14.3566	18.9059	21.9286	30.2676	33.8536	19.3982	24.9633	29.5861	YDR032C
YDR033W	chrIV	507777	509549		280.219	323.705	234.748	284.726	216.67	114.72	184.776	249.227	165.537	246.286	YDR033W
YDR034C	chrIV	509494	512250		79.4261	76.2362	37.8624	38.3869	32.4764	39.3045	39.7465	37.763	35.5574	36.345	YDR034C
YDR035W	chrIV	521725	523148		80.2291	92.3843	38.8219	46.3336	37.2486	40.4518	45.0883	39.9788	42.2436	45.7668	YDR035W
YDR036C	chrIV	523137	524783		39.0604	39.3325	18.1184	19.1926	19.1182	27.8746	24.0093	17.855	18.9149	19.0886	YDR036C
YDR037W	chrIV	525278	527282	1_RiBi	258.846	227.817	156.007	143.413	122.291	104.032	99.3342	131.456	120.729	114.664	YDR037W
YDR038C	chrIV	527277	530791		58.2095	60.6581	27.1562	30.3487	18.3705	25.4206	23.3607	26.3917	26.8929	26.8885	YDR038C
YDR039C	chrIV	531187	534676		55.9349	59.5629	26.0343	29.189	17.372	24.0068	21.8617	25.293	26.0548	26.3062	YDR039C
YDR040C	chrIV	534970	538894		43.6835	47.0309	20.1613	22.8549	13.6788	20.0342	18.1139	19.1543	20.0649	19.7259	YDR040C
YDR041W	chrIV	539759	540573		78.1218	92.6866	39.1356	45.8917	41.126	49.5747	51.7022	38.8647	46.0009	50.7455	YDR041W
YDR043C	chrIV	542553	543569		126.408	164.571	59.2008	70.1451	63.0605	71.2758	72.2268	62.6898	67.5525	78.775	YDR043C
YDR044W	chrIV	546388	547765		32.8031	40.6117	17.8292	21.6766	16.6302	23.969	20.79	18.0511	20.5688	20.0489	YDR044W
YDR045C	chrIV	547839	548467		94.0931	97.1355	46.3608	48.3753	43.6653	44.2123	42.2001	47.167	50.3695	46.4436	YDR045C
YDR046C	chrIV	548682	550668		117.427	145.352	54.7205	62.4499	78.7031	75.2818	79.5151	77.9129	75.3955	78.4568	YDR046C
YDR047W	chrIV	551389	553027		119.714	124.773	57.3716	63.4075	65.8158	63.3701	58.2168	66.4811	63.8484	65.0903	YDR047W
YDR049W	chrIV	553224	555249		58.8395	60.1038	30.8868	33.1232	25.2655	27.0967	27.1518	27.7505	28.9156	30.1239	YDR049W
YDR050C	chrIV	555646	556500		873.346	1001.67	457.24	526.123	490.488	413.325	429.469	472.047	541.526	541.415	YDR050C
YDR051C	chrIV	556993	558104		70.6031	78.7723	39.7638	41.9827	37.9487	44.5604	41.6937	38.262	40.6811	42.7487	YDR051C
YDR052C	chrIV	558263	560777		88.0746	95.2182	46.211	49.1036	39.8761	39.3872	39.9424	41.489	43.5032	44.0652	YDR052C
YDR054C	chrIV	560970	562528		112.674	121.95	58.1802	61.2085	49.0312	48.048	51.2522	52.8024	52.0518	59.09	YDR054C
YDR055W	chrIV	563446	565020		148.687	242.908	95.2246	140.553	103.206	74.5382	128.268	108.164	94.1354	150.02	YDR055W
YDR056C	chrIV	564917	565750		78.439	88.1689	39.2311	46.0139	38.8051	41.1654	49.1064	41.4252	40.0807	50.4293	YDR056C
YDR057W	chrIV	565877	567633		35.1834	38.3565	17.4524	18.2073	16.7433	19.1182	18.2211	16.8629	17.574	19.0649	YDR057W
YDR058C	chrIV	567588	568734		17.4118	22.844	8.16757	11.5822	8.93111	9.48911	11.0491	8.82803	8.97158	12.9762	YDR058C
YDR059C	chrIV	569094	569824		37.446	48.0202	16.8909	20.0762	18.8104	22.8438	24.3517	19.2712	23.8621	26.396	YDR059C
YDR060W	chrIV	570553	573815	1_RiBi	151.267	145.26	94.1715	102.389	59.7236	66.2988	68.0011	69.5685	70.2475	69.3605	YDR060W
YDR061W	chrIV	574107	575894		43.4386	48.5127	21.6962	23.2239	22.9735	33.6788	27.5402	22.741	23.5247	25.3861	YDR061W
YDR062W	chrIV	576067	578447		88.1961	88.971	46.1054	49.0509	40.0983	43.1404	45.2186	42.8703	43.1062	43.783	YDR062W
YDR063W	chrIV	578533	579242		88.2734	92.312	40.1175	36.5953	56.2621	44.647	48.8972	59.7018	45.4389	48.6698	YDR063W
YDR064W	chrIV	579358	580549	2_RPG	1049.15	455.476	635.039	274.325	559.959	198.035	146.513	549.238	377.437	236.8	YDR064W
YDR067C	chrIV	582707	583535		66.8717	76.3939	30.9445	34.8964	30.7469	37.3672	41.2252	32.4414	35.4452	40.4444	YDR067C
YDR068W	chrIV	583658	584819		56.7352	61.321	29.8051	33.0844	26.8792	31.2242	33.4865	28.3733	29.2538	30.1582	YDR068W
YDR069C	chrIV	584636	587780		31.5612	36.0115	13.3845	15.7923	14.4608	24.5639	22.2867	14.7127	18.2619	17.5661	YDR069C
YDR070C	chrIV	588020	588456		42.3904	50.5945	17.4347	18.3118	22.4053	28.8847	28.512	19.8141	23.719	28.2263	YDR070C
YDR071C	chrIV	588743	589542		120.968	120.518	55.6609	57.3671	54.875	70.1878	64.2872	54.7813	65.5054	60.25	YDR071C
YDR072C	chrIV	589662	591538		128.842	141.196	52.4734	59.6494	60.7815	70.3478	67.8776	60.2185	62.7705	66.4808	YDR072C
YDR074W	chrIV	593676	596825		71.3499	88.8379	26.181	28.6502	38.6073	58.5021	63.7823	35.0476	40.7803	45.664	YDR074W
YDR075W	chrIV	596951	598245		61.1153	62.0657	35.9442	38.8059	27.6156	34.925	34.9307	31.4683	33.7509	35.0814	YDR075W
YDR077W	chrIV	600726	602135		695.85	1136.73	413.391	589.044	616.541	411.399	645.338	485.095	407.544	634.85	YDR077W
YDR078C	chrIV	601868	602884		144.716	203.922	77.6987	102.487	103.002	90.2365	127.202	99.6561	85.6519	121.906	YDR078C
YDR079W	chrIV	603028	603690		65.9931	73.2388	26.5837	28.7993	30.8561	37.1026	40.9728	32.2821	37.3149	40.3988	YDR079W
YDR079C-A	chrIV	603378	603884		56.0271	67.4421	27.5117	30.6746	31.5721	36.5803	38.6944	32.9938	39.2599	37.3422	YDR079C-A
YDR080W	chrIV	603974	607158		28.5084	28.4975	14.3595	15.1161	11.6389	16.8805	17.1607	13.2348	13.5162	14.6857	YDR080W
YDR081C	chrIV	607160	610166		54.2787	51.3457	26.6722	29.7312	22.3504	34.2404	31.1779	25.3185	27.7957	25.8132	YDR081C
YDR082W	chrIV	610347	611981		56.0098	57.0978	27.6012	30.7894	26.4568	31.9945	31.5954	27.8405	30.6137	30.6242	YDR082W
YDR083W	chrIV	612049	613367	1_RiBi	89.6407	90.4072	64.9534	70.3055	35.1499	43.6875	41.2889	41.1911	41.5329	42.9989	YDR083W
YDR084C	chrIV	613201	614072		46.6802	52.2727	22.6052	27.6003	24.4048	29.1043	30.8015	24.9644	27.6931	27.801	YDR084C
YDR085C	chrIV	614198	616294		27.9129	35.1159	11.3589	14.7733	12.4711	16.9897	22.5614	11.8557	13.0455	18.7388	YDR085C
YDR086C	chrIV	616730	617289		207.92	212.391	94.0265	94.0193	97.0897	94.1929	110.687	95.965	105.193	113.548	YDR086C
YDR087C	chrIV	617375	618364	1_RiBi	127.626	127.116	81.2363	89.4194	61.5227	71.3195	66.2919	68.0868	68.179	70.6808	YDR087C
YDR089W	chrIV	622067	624813		52.6964	62.3962	21.2797	24.1222	19.8407	32.9099	30.1047	22.4232	26.0017	27.779	YDR089W
YDR090C	chrIV	624824	626116		54.1525	58.5116	24.7824	28.3515	22.6258	29.9383	27.3839	23.1561	24.7789	25.8601	YDR090C
YDR091C	chrIV	626372	628604	1_RiBi	149.101	141.894	84.1751	84.3094	64.224	69.7078	70.2203	72.0995	75.4393	73.0523	YDR091C
YDR092W	chrIV	629840	630700		100.154	100.644	40.654	43.8961	49.0526	56.1388	52.3539	46.7187	53.3258	50.5886	YDR092W
YDR093W	chrIV	631014	636173		66.3158	68.9487	32.1225	33.9791	28.2687	35.1396	33.078	28.98	31.2332	30.7973	YDR093W
YDR097C	chrIV	639942	643928		41.8713	45.2849	25.7804	27.406	19.5847	29.6011	26.2667	21.5385	22.1418	21.4735	YDR097C
YDR098C	chrIV	644126	645035		88.5339	105.551	51.295	55.6288	48.8574	60.3066	60.9479	50.4948	59.5819	58.9515	YDR098C
YDR099W	chrIV	652780	654650		142.876	153.753	64.5843	67.6195	63.967	89.2358	92.7086	65.2554	74.9663	74.5049	YDR099W
YDR100W	chrIV	654968	655571		48.8507	53.8002	18.7928	22.0874	22.0779	29.2589	28.4846	21.1195	24.549	29.123	YDR100W
YDR101C	chrIV	655565	657492	1_RiBi	142.042	133.15	96.9073	105.177	59.8306	70.4256	67.5562	71.7068	74.3672	69.2672	YDR101C
YDR103W	chrIV	658303	661142		66.1214	68.9438	34.0904	37.5048	29.5735	40.0491	40.4489	32.4495	37.0539	36.3276	YDR103W
YDR104C	chrIV	661026	664946		25.8573	26.1797	11.7683	13.1002	10.606	14.9972	13.8459	11.4074	11.9823	12.3504	YDR104C
YDR105C	chrIV	665249	666841		33.476	38.4208	13.4318	15.2838	14.7304	21.2863	22.7005	14.0757	17.8426	18.4141	YDR105C
YDR107C	chrIV	668873	671059		50.35	52.6723	23.615	23.8335	19.6633	57.5007	50.7143	18.9959	32.267	23.7787	YDR107C
YDR108W	chrIV	671200	673412		36.107	38.0239	19.0246	21.195	16.5204	48.7037	42.9934	17.0013	24.2253	20.0698	YDR108W
YDR109C	chrIV	673399	675667		33.7069	37.9046	17.3337	19.952	15.4139	24.4138	25.1148	15.9575	17.7598	18.441	YDR109C
YDR110W	chrIV	676045	678008		54.6815	53.2147	31.594	31.5084	25.4758	39.2423	33.4667	26.9209	31.6627	29.3132	YDR110W
YDR111C	chrIV	678009	680015		33.8848	33.2055	17.0637	15.9078	18.8164	26.6543	25.3358	19.3409	21.0626	18.8302	YDR111C
YDR113C	chrIV	680419	681717		64.8281	79.233	33.8854	36.4516	30.3675	30.9875	36.4988	28.7802	29.1693	33.6253	YDR113C
YDR115W	chrIV	682117	682612		81.4255	87.4423	35.6333	38.4694	44.322	44.8232	51.458	40.4362	41.5941	49.9602	YDR115W
YDR116C	chrIV	682599	683614		62.3542	67.7954	34.0451	36.5836	32.0303	35.0737	37.622	32.6197	35.3583	35.9496	YDR116C
YDR117C	chrIV	683898	685687		42.9448	48.5162	19.8622	23.0831	18.5365	24.3281	26.6468	19.7517	21.6456	23.4773	YDR117C
YDR118W	chrIV	685850	688032		42.7919	42.0514	20.4607	20.4656	20.7912	25.5456	25.3946	21.738	22.8329	22.8677	YDR118W
YDR119W	chrIV	688116	690615		93.1832	91.6341	48.3465	46.4272	42.1883	49.4679	51.1417	42.7889	44.672	44.7659	YDR119W
YDR119W-A	chrIV	690964	691460		28.7069	50.1859	14.9539	16.2938	15.364	16.9461	24.6731	14.5364	10.6547	20.3709	YDR119W-A
YDR120C	chrIV	691332	693261		71.9674	58.0738	44.4357	39.2736	31.4339	33.2657	28.9188	35.4351	34.0286	29.0603	YDR120C
YDR121W	chrIV	693440	694283		58.7004	59.218	30.9684	34.3733	29.0731	36.9513	33.7299	30.3667	32.9423	30.9093	YDR121W
YDR122W	chrIV	694381	698104		42.7822	50.5354	18.4689	19.9823	20.3482	35.947	36.2429	20.3002	24.3592	25.9265	YDR122W
YDR123C	chrIV	698024	699506		53.5673	47.7037	25.4607	24.3888	22.9781	29.5674	22.7962	22.9675	21.4601	19.4729	YDR123C
YDR127W	chrIV	704378	709303		73.9276	73.0407	31.6218	31.9187	29.7468	36.9624	35.4434	30.9494	33.2716	30.8514	YDR127W
YDR128W	chrIV	709503	713206		39.9795	38.3826	19.282	19.8604	17.0665	19.5368	20.8493	18.052	19.4444	18.1848	YDR128W
YDR129C	chrIV	713192	715450		97.1744	108.076	48.8037	53.7788	44.2937	70.0225	78.2107	44.6423	53.215	55.8019	YDR129C
YDR130C	chrIV	715459	716648		62.5985	67.5375	33.2542	34.3919	34.0066	36.927	38.5407	33.4101	34.0383	38.5539	YDR130C
YDR131C	chrIV	716703	718557		30.5559	34.4231	15.2866	18.0732	14.0991	15.9263	17.9601	15.5289	16.6324	17.9472	YDR131C
YDR132C	chrIV	718697	720422		47.0075	52.2446	22.6641	26.4904	19.9384	39.7443	31.0448	22.4481	24.9401	26.6823	YDR132C
YDR135C	chrIV	722911	727592		66.5488	72.7076	29.9738	34.6962	28.4294	33.9171	38.3468	29.9218	31.9862	33.6411	YDR135C
YDR137W	chrIV	728152	730388		47.9628	49.9117	23.2022	24.7802	21.0827	22.7323	25.8148	22.1252	22.8634	23.9127	YDR137W
YDR138W	chrIV	730543	733490		61.943	62.7795	31.2885	33.411	26.4065	39.0798	38.4537	27.7758	32.9469	30.4453	YDR138W
YDR139C	chrIV	733442	733978		75.5713	73.4774	32.8764	33.9528	38.4863	38.2	41.878	36.9143	43.3902	39.5366	YDR139C
YDR140W	chrIV	734122	734852		59.2507	59.9027	30.7474	30.7268	27.7623	28.315	28.4529	29.8193	29.8038	29.2269	YDR140W
YDR141C	chrIV	734724	740099		48.1604	50.5315	23.3191	23.6815	19.6149	29.23	29.5631	21.6697	24.2535	23.0809	YDR141C
YDR142C	chrIV	740357	741746		41.929	45.5733	19.1965	20.1449	18.8872	19.7169	21.6961	19.1843	22.4528	21.046	YDR142C
YDR143C	chrIV	741961	744045		71.4436	77.4952	34.2689	39.644	30.2095	38.2018	39.9533	32.3603	36.7127	37.2767	YDR143C
YDR144C	chrIV	744225	746261		89.8771	88.8155	45.9807	44.0576	39.2906	45.9755	44.3248	42.8763	44.6989	41.3364	YDR144C
YDR145W	chrIV	746648	748390		78.8358	84.9373	41.0614	44.8884	36.7894	42.6949	45.7783	35.7099	41.1982	40.6913	YDR145W
YDR146C	chrIV	748612	750911		83.9737	94.8449	37.4807	42.1102	35.5432	34.3089	46.24	38.2446	42.2035	49.5237	YDR146C
YDR147W	chrIV	751558	753400		44.4821	45.4198	20.8362	23.1936	17.6737	20.4473	23.1849	19.1694	21.8697	21.9895	YDR147W
YDR148C	chrIV	753395	755327		45.061	53.9906	20.9726	23.9379	28.3226	32.5145	38.4035	26.1377	30.6109	35.2474	YDR148C
YDR150W	chrIV	755558	763923		45.5455	45.3863	23.6261	25.0657	20.4402	22.0712	24.3623	22.174	23.7371	23.7067	YDR150W
YDR151C	chrIV	763919	765317		112.103	115.172	53.2159	50.3915	55.4858	104.218	77.264	56.2683	67.8904	59.1684	YDR151C
YDR152W	chrIV	765628	766560		164.178	182.588	108.604	121.378	81.7949	92.4045	96.3661	87.0563	91.2731	98.7219	YDR152W
YDR153C	chrIV	766611	768048		122.796	132.471	78.3754	85.3879	56.6181	61.0017	65.3018	60.9303	58.0683	63.7243	YDR153C
YDR155C	chrIV	768402	769094		408.769	372.656	149.062	112.187	273.467	476.094	291.667	223.599	328.074	205.766	YDR155C
YDR156W	chrIV	769467	770032	1_RiBi	230.028	244.392	100.813	109.996	113.901	145.137	126.358	110.715	103.181	113.816	YDR156W
YDR158W	chrIV	770316	771577		139.729	136.488	60.5295	60.0526	63.4138	58.5697	50.1149	64.9765	63.5764	62.4072	YDR158W
YDR159W	chrIV	771778	775841		46.4561	47.4242	22.6848	23.6096	18.9785	23.9999	25.8873	20.8551	23.0196	22.0835	YDR159W
YDR160W	chrIV	775979	778772		32.5774	36.4532	15.7374	16.5415	14.2062	19.0267	19.6897	14.8017	16.3748	17.2359	YDR160W
YDR161W	chrIV	779000	780286		85.4333	80.727	52.9799	58.0028	37.3229	44.9803	41.9151	39.623	44.9627	42.542	YDR161W
YDR162C	chrIV	780211	781230		58.34	62.6542	29.9648	31.8996	27.9745	35.5065	33.5857	28.2255	30.5148	31.1066	YDR162C
YDR163W	chrIV	781348	782055		58.9815	66.4062	30.7115	32.4215	29.6462	34.2381	37.2486	29.3422	31.7986	34.6247	YDR163W
YDR164C	chrIV	781927	784265		43.1143	42.7462	19.666	22.5908	17.0009	19.7821	22.3937	18.6449	20.758	21.7691	YDR164C
YDR165W	chrIV	784827	786295	1_RiBi	119.936	113.097	67.118	73.9755	49.8962	60.2951	60.7815	56.9836	63.2433	60.6777	YDR165W
YDR166C	chrIV	786194	789292		50.266	49.6618	27.3401	28.7954	21.1105	34.8233	31.7849	23.9573	27.681	25.6133	YDR166C
YDR167W	chrIV	789412	790170		79.4075	87.374	41.442	45.1779	44.2789	47.364	50.8646	42.6296	45.4238	49.3804	YDR167W
YDR168W	chrIV	790286	791926		72.7139	70.3457	36.069	36.9054	29.8297	36.4872	37.7602	32.2451	38.0506	34.8598	YDR168W
YDR169C	chrIV	792106	794253		43.8859	48.4098	18.7226	20.887	18.8706	26.6855	27.3724	19.0612	20.6368	21.4753	YDR169C
YDR170C	chrIV	795993	802438		62.3193	65.0764	32.691	35.0666	26.2596	30.0784	32.8145	28.737	30.6341	32.022	YDR170C
YDR171W	chrIV	806533	807833	4_HSF1	39.4224	46.3457	15.5287	13.2039	28.048	335.384	122.744	17.3575	57.6381	25.6274	YDR171W
YDR172W	chrIV	808249	810558		203.611	209.617	126.956	137.153	98.3465	94.6371	103.817	100.222	100.477	102.938	YDR172W
YDR173C	chrIV	810494	811697		52.1466	48.685	22.806	22.1993	27.3997	36.6798	34.0851	27.2968	31.5979	28.5913	YDR173C
YDR174W	chrIV	812073	813022		258.595	174.498	135.02	94.1943	143.867	84.7937	69.5008	135.844	98.9757	86.2266	YDR174W
YDR175C	chrIV	813072	814209		62.6521	60.396	33.5938	32.8701	30.2379	35.308	33.7927	32.5219	33.962	32.2466	YDR175C
YDR176W	chrIV	814402	816829		75.3479	77.3632	40.3979	40.0452	36.479	42.0678	39.0564	37.217	38.9058	36.4624	YDR176W
YDR177W	chrIV	816836	817588		76.0355	80.5524	30.4855	32.6308	31.814	44.9814	40.5353	31.758	33.6066	32.8457	YDR177W
YDR178W	chrIV	817827	818665		32.2852	43.5999	15.5877	17.2663	23.2866	29.7442	33.3741	19.1571	23.9691	28.0678	YDR178W
YDR179C	chrIV	818582	819229		29.1822	31.2124	15.6555	19.2292	13.9183	16.3063	18.2149	13.4363	15.7436	18.1272	YDR179C
YDR179W-A	chrIV	819330	820976		37.3459	38.1542	16.5447	18.7568	14.7072	18.0237	18.4654	15.2332	17.2268	17.8426	YDR179W-A
YDR180W	chrIV	821150	825825		32.4232	33.4716	15.9567	17.1667	12.6305	21.3632	19.7242	14.1363	17.5493	15.42	YDR180W
YDR181C	chrIV	825767	827383		48.404	52.0243	26.3354	28.333	21.9475	25.1478	25.4966	22.7053	25.2966	25.5039	YDR181C
YDR182W	chrIV	827527	829170		51.6537	54.9723	26.647	27.6392	23.3039	27.3768	27.6514	23.7798	26.6086	27.8797	YDR182W
YDR183W	chrIV	829513	830324		51.5873	54.172	25.3452	28.1353	23.5653	28.9295	27.281	24.7062	27.0906	27.8153	YDR183W
YDR184C	chrIV	830388	831612		99.738	99.8571	66.5404	70.9986	47.7894	55.6517	55.4416	52.337	57.4456	55.4023	YDR184C
YDR185C	chrIV	831728	832585		72.2052	66.2355	36.8897	37.8633	37.5712	43.2491	36.8949	36.8251	42.4989	40.8193	YDR185C
YDR186C	chrIV	832735	835682		106.201	113.048	53.5286	55.0648	44.4447	59.0701	57.8023	46.3743	49.5154	48.4591	YDR186C
YDR188W	chrIV	836371	838225		149.46	154.315	79.6356	86.5415	77.5216	98.2968	86.8049	70.1463	78.5399	74.2046	YDR188W
YDR189W	chrIV	838326	840487		55.8373	57.8204	29.3631	29.8079	26.9587	29.1851	30.5934	27.8198	30.0224	30.2022	YDR189W
YDR190C	chrIV	840500	842054		141.83	155.442	83.8852	98.4287	66.1077	77.9887	85.2022	68.566	74.5711	80.7572	YDR190C
YDR191W	chrIV	842291	843557		32.9363	38.9181	18.1034	21.7768	16.849	18.4536	20.638	17.579	18.5372	20.4882	YDR191W
YDR192C	chrIV	843474	844938		30.6405	33.771	15.5302	17.7295	14.6663	19.0199	18.3468	14.904	16.9238	17.8221	YDR192C
YDR194C	chrIV	845796	847978		127.497	126.025	66.2059	74.5488	51.0697	67.0413	66.893	58.5255	63.8094	64.3574	YDR194C
YDR195W	chrIV	848358	850275		56.8429	55.6625	22.3391	23.2478	20.4489	33.5616	29.7479	21.1719	26.0034	22.4071	YDR195W
YDR196C	chrIV	850189	850999		46.8983	52.7823	25.291	25.618	24.6656	33.1121	32.336	23.0469	27.1441	30.2469	YDR196C
YDR197W	chrIV	851193	852527		47.8218	51.1531	22.1005	26.5306	20.6826	28.3219	28.7876	20.839	26.5857	27.556	YDR197W
YDR198C	chrIV	852490	854024		47.6953	42.4001	24.9933	26.0471	19.8731	21.9056	20.8203	21.6738	21.2649	21.1685	YDR198C
YDR200C	chrIV	854145	856170		33.2807	36.6873	15.504	16.8151	15.2257	18.1633	19.0003	15.151	16.6242	17.6485	YDR200C
YDR201W	chrIV	856268	856964		37.4746	38.1571	17.451	18.3562	19.4364	20.6871	22.7769	18.2801	19.4467	22.2447	YDR201W
YDR202C	chrIV	856864	857982		32.9842	37.3896	15.6138	15.993	16.3549	20.6044	21.9927	16.6975	19.0552	18.9981	YDR202C
YDR204W	chrIV	858095	859251		28.2123	32.4206	10.834	13.1026	15.8011	19.2236	21.6546	14.5227	16.9801	18.6101	YDR204W
YDR205W	chrIV	859312	861617		37.608	37.9993	15.622	16.5635	16.6434	18.9562	19.8594	16.3503	18.3097	18.1545	YDR205W
YDR206W	chrIV	861705	864938		64.2162	60.2298	35.6091	36.0762	26.1116	33.611	33.8479	30.0446	32.3703	29.8569	YDR206W
YDR207C	chrIV	864816	867588		30.7205	28.9274	14.3562	14.3162	15.3295	19.2614	16.4638	14.1794	15.5153	14.3216	YDR207C
YDR208W	chrIV	868053	870698		107.238	116.593	55.5194	62.7471	45.3257	50.6576	56.7684	48.4152	49.7559	53.5291	YDR208W
YDR210W	chrIV	871040	871484		146.596	162.116	76.5495	85.5233	93.1362	82.9504	76.5461	92.4708	95.093	89.36	YDR210W
YDR211W	chrIV	884646	887020	1_RiBi	97.3407	94.9171	51.7118	53.3055	39.4508	45.0967	43.3013	44.9241	46.458	44.4588	YDR211W
YDR212W	chrIV	887146	888998		108.914	105.472	54.7531	52.8274	45.2411	46.7204	46.8885	47.8438	52.9712	50.54	YDR212W
YDR213W	chrIV	889530	892732		73.7572	74.8781	26.9727	28.3086	37.5242	47.2216	38.1368	33.2718	41.566	32.6867	YDR213W
YDR214W	chrIV	892732	894023	4_HSF1	131.724	104.563	38.2403	27.9591	62.0446	164.788	81.7564	48.7923	92.7167	43.6578	YDR214W
YDR216W	chrIV	894508	899220		28.8346	17.9765	11.6169	7.48424	14.9446	42.5673	40.888	14.0891	36.3772	12.7202	YDR216W
YDR217C	chrIV	899281	903535		40.2393	38.3139	22.2722	21.8581	15.3841	19.6018	18.9277	17.7454	20.31	17.3201	YDR217C
YDR219C	chrIV	905038	907097		58.0008	60.3062	27.6229	31.6724	25.2477	31.3066	35.1193	26.9238	30.6726	31.3758	YDR219C
YDR221W	chrIV	907299	909683		62.1274	65.6587	30.3677	32.8701	33.0629	38.2355	35.451	32.4315	35.2413	34.4661	YDR221W
YDR224C	chrIV	914198	914744		921.35	1007.23	551.399	554.241	652.179	295.039	327.537	534.352	649.036	637.868	YDR224C
YDR225W	chrIV	915406	916088		859.965	922.184	491.963	502.03	615.138	249.402	271.363	522.835	578.851	591.653	YDR225W
YDR226W	chrIV	916415	917282		177.781	178.503	93.8623	94.9344	97.7313	84.6796	85.7922	93.7793	99.3517	105.229	YDR226W
YDR227W	chrIV	917444	921839		41.0439	42.3629	21.8732	23.9975	16.6972	22.2131	20.1719	18.1046	19.5627	19.3091	YDR227W
YDR228C	chrIV	921852	923894		65.0539	61.048	30.4644	27.4488	27.7714	41.8169	36.5556	28.7416	33.8823	28.6324	YDR228C
YDR229W	chrIV	924682	926201		50.8313	56.1215	26.9946	28.8005	24.1459	31.9495	32.5699	23.2164	28.069	27.3985	YDR229W
YDR231C	chrIV	926136	926940		45.2321	51.1513	18.8296	20.8441	29.2243	44.4613	40.4024	25.6507	29.5852	29.6335	YDR231C
YDR232W	chrIV	927190	929274		99.1927	110.289	41.8465	52.3154	43.4059	58.7199	51.6164	41.1798	45.2115	46.0152	YDR232W
YDR233C	chrIV	929321	930427		327.019	302.425	146.044	137.249	139.475	121.312	133.899	140.134	134.85	139.99	YDR233C
YDR234W	chrIV	930923	933320		77.996	75.5041	40.5463	42.086	35.8049	38.6739	36.4003	37.2741	37.0892	36.4568	YDR234W
YDR235W	chrIV	933471	935221		49.7943	49.4576	25.348	25.7216	21.3553	26.9885	27.5365	24.0422	26.9539	25.6237	YDR235W
YDR236C	chrIV	935139	935915		39.2112	44.8379	19.8393	20.4966	20.782	28.1035	26.1112	20.5668	21.6044	23.8143	YDR236C
YDR237W	chrIV	936471	937612		53.455	55.7944	28.616	28.9535	27.6544	33.2239	33.8119	25.9723	30.505	28.7639	YDR237W
YDR238C	chrIV	937616	940874		102.909	101.71	53.4212	54.1729	44.6219	52.1539	54.2084	46.6408	50.1949	50.0049	YDR238C
YDR239C	chrIV	940978	943443		34.2096	36.7311	17.6325	18.2814	15.3825	22.1967	20.3163	16.7212	18.4602	17.9823	YDR239C
YDR240C	chrIV	943614	945170		46.799	48.902	23.9684	25.322	19.2492	24.3946	25.5602	21.6139	24.028	23.7609	YDR240C
YDR242W	chrIV	946698	948597		38.6234	43.2534	16.4305	20.3283	13.176	21.6251	22.1093	13.9466	16.3919	17.4297	YDR242W
YDR243C	chrIV	948499	950314		42.5536	44.8505	24.7174	25.7253	18.0757	27.8594	25.7427	19.519	22.6964	20.5541	YDR243C
YDR244W	chrIV	950536	952595		38.4427	42.0501	19.6323	21.7807	18.5238	24.5311	25.2312	20.3461	19.4565	21.2638	YDR244W
YDR245W	chrIV	952714	954131		127.614	131.145	74.3854	82.6353	57.2655	61.0014	66.1474	61.2393	65.8396	71.3198	YDR245W
YDR246W	chrIV	954251	955097		70.015	71.6528	33.0884	33.0784	39.5778	53.9235	45.4727	36.3163	43.367	41.4655	YDR246W
YDR247W	chrIV	955709	957788		44.5021	49.2148	18.1959	20.289	17.8905	30.5959	29.7494	17.436	21.8551	23.0938	YDR247W
YDR248C	chrIV	957654	958436		34.7106	49.0343	14.675	18.6031	17.3634	24.4593	31.6591	17.1037	19.577	26.7476	YDR248C
YDR249C	chrIV	958563	959858		50.1548	45.7264	24.4032	24.9991	20.5222	29.3917	29.9222	21.7039	23.6171	23.995	YDR249C
YDR251W	chrIV	960303	963307		51.5165	58.5662	21.9044	23.0493	23.4961	30.4463	35.2174	23.1701	27.6488	27.3929	YDR251W
YDR252W	chrIV	963402	964451		40.9268	43.9182	16.721	18.2272	17.2563	19.2506	18.687	17.6785	17.5144	20.7855	YDR252W
YDR254W	chrIV	965024	967001		40.657	47.398	14.8936	17.1245	15.5172	24.443	29.4217	15.9283	19.3643	22.5572	YDR254W
YDR255C	chrIV	966328	967865		43.7243	55.4055	17.7936	21.3769	18.645	26.8972	33.8467	18.3599	23.3377	27.4618	YDR255C
YDR257C	chrIV	969672	971476		80.7744	85.999	47.9569	52.1667	34.5932	46.8962	43.6719	37.8563	42.2742	43.1749	YDR257C
YDR258C	chrIV	971698	974275	4_HSF1	67.4452	72.593	21.2329	17.6627	34.9739	164.179	90.9403	25.4366	52.518	27.1746	YDR258C
YDR259C	chrIV	974486	975986		52.2342	51.2114	15.7193	17.3166	24.9453	70.3762	40.4372	20.2684	32.5431	21.589	YDR259C
YDR260C	chrIV	976373	977287		92.2442	102.764	43.414	50.885	55.3304	65.0475	58.9739	53.2346	56.3606	64.1477	YDR260C
YDR261C	chrIV	977398	979308		65.1479	80.3722	30.591	35.4347	30.7937	43.7622	42.0053	30.124	36.527	39.5156	YDR261C
YDR264C	chrIV	995765	998427		65.8912	74.1526	29.6726	35.2929	26.2216	33.6253	38.0205	29.604	32.5025	34.1521	YDR264C
YDR265W	chrIV	998641	1000056		45.4092	50.2202	21.4878	22.3103	19.9425	26.312	26.2154	21.2111	21.825	23.1622	YDR265W
YDR266C	chrIV	999980	1002237		80.5894	79.8684	39.6858	40.1451	32.3394	35.2499	38.023	35.4401	37.1911	37.6791	YDR266C
YDR267C	chrIV	1002315	1003571		59.6584	65.7332	32.596	35.8108	31.4803	32.9947	32.8264	32.0975	32.5856	34.4216	YDR267C
YDR268W	chrIV	1003929	1005246		90.2033	91.9659	43.0833	44.3037	40.1507	36.6955	37.966	46.4832	49.0687	46.7786	YDR268W
YDR270W	chrIV	1005571	1008750		46.6151	54.4209	29.1678	30.3807	22.0461	26.0042	27.6692	28.4053	31.1471	29.3415	YDR270W
YDR272W	chrIV	1008924	1009887		62.2339	71.7115	31.0166	34.1436	28.1638	32.2733	36.8193	28.1793	33.1838	37.3573	YDR272W
YDR275W	chrIV	1012120	1013363		120.923	148.398	57.3827	65.6536	51.2192	57.373	63.3573	54.2959	53.19	62.6417	YDR275W
YDR276C	chrIV	1013252	1013716		327.286	388.771	153.985	167.762	192.892	153.31	180.27	184.294	174.551	211.907	YDR276C
YDR277C	chrIV	1014207	1015858		47.8347	54.508	21.2669	21.683	30.3177	47.5975	44.3027	26.8614	34.8038	35.1922	YDR277C
YDR279W	chrIV	1019288	1020502		53.5225	58.2194	28.6662	27.6635	24.933	28.2042	27.1433	26.8703	29.4483	27.7662	YDR279W
YDR280W	chrIV	1020604	1021772		121.853	122.214	69.5924	76.6019	53.9152	58.6579	60.7853	58.536	63.1866	61.2453	YDR280W
YDR281C	chrIV	1021802	1022426		70.4086	72.204	12.8831	14.8286	12.7041	17.1586	13.3707	13.858	16.5133	14.9171	YDR281C
YDR282C	chrIV	1023168	1024760		22.4946	24.8837	9.96027	11.5759	9.0078	11.1346	12.0541	9.48317	10.4206	11.4109	YDR282C
YDR283C	chrIV	1024910	1030275		42.2611	43.8295	20.3286	21.9959	16.4868	23.7733	25.7235	17.722	22.0982	21.2639	YDR283C
YDR284C	chrIV	1030461	1031706		61.4265	70.0465	26.1632	29.0315	29.4899	36.6741	37.8174	30.6346	33.2713	38.8282	YDR284C
YDR287W	chrIV	1035951	1036959		27.6889	35.9395	13.4724	16.0818	13.2061	16.4019	18.3957	13.2005	14.2424	17.0113	YDR287W
YDR288W	chrIV	1037139	1038270		50.4913	55.5688	23.6866	26.7	21.5183	30.432	31.9824	23.4759	26.7367	29.3473	YDR288W
YDR289C	chrIV	1038095	1039578		54.4651	64.0666	33.1453	35.0151	26.0839	29.1108	33.5212	28.4477	31.1019	33.6154	YDR289C
YDR291W	chrIV	1039727	1043176		36.1678	38.1454	18.0035	20.142	14.7425	21.966	20.7083	17.076	19.1806	19.0434	YDR291W
YDR292C	chrIV	1043088	1045172		70.9127	67.8525	38.4348	39.5404	28.2205	37.2352	37.7745	31.258	36.6435	33.5228	YDR292C
YDR293C	chrIV	1045396	1049517		94.1995	119.582	38.6516	48.942	38.1524	51.506	63.0942	41.0678	46.6448	54.3895	YDR293C
YDR294C	chrIV	1050406	1052304		64.608	74.5184	29.4794	35.7709	29.8148	33.8861	38.2528	28.1688	32.8226	37.2986	YDR294C
YDR295C	chrIV	1052536	1054908		34.525	37.434	15.281	17.113	13.1199	16.9964	18.2107	13.9553	17.6654	16.6096	YDR295C
YDR296W	chrIV	1055157	1055967		97.1151	113.518	43.571	51.4898	51.0615	61.6245	62.1494	47.8731	53.6842	57.4604	YDR296W
YDR297W	chrIV	1056431	1057764		75.0492	101.644	36.4778	47.6279	36.5917	47.7914	48.1101	35.4964	40.3891	46.0422	YDR297W
YDR298C	chrIV	1057997	1058992		103.419	115.524	58.9832	64.1194	66.6198	66.121	72.7791	63.5072	77.0629	78.5653	YDR298C
YDR299W	chrIV	1059565	1061489	1_RiBi	156.817	152.231	117.052	125.692	65.873	85.599	80.1006	76.1875	84.6524	80.5149	YDR299W
YDR300C	chrIV	1061412	1062873		92.1771	85.6474	47.8437	50.3098	43.1205	53.1662	46.8929	42.8099	48.1981	47.201	YDR300C
YDR301W	chrIV	1063275	1067475		41.7385	42.9311	20.837	21.6218	18.5472	25.337	25.0082	19.8237	22.6001	21.6897	YDR301W
YDR302W	chrIV	1067658	1068470		54.8066	56.6404	27.4203	30.931	24.9169	25.6404	29.7861	25.3019	27.8988	31.143	YDR302W
YDR303C	chrIV	1068619	1071701		57.2555	59.1148	29.6068	30.7952	25.116	27.1155	26.5069	26.4971	28.7287	28.0208	YDR303C
YDR304C	chrIV	1071808	1072611		80.837	88.4489	40.7694	42.9492	45.2601	56.6011	53.8017	41.852	51.0305	50.1518	YDR304C
YDR306C	chrIV	1073659	1075227		38.738	41.9067	17.5193	19.1586	16.2597	20.818	22.0795	16.7576	18.8513	19.674	YDR306C
YDR307W	chrIV	1075804	1078005		34.8234	39.4404	16.6238	18.1918	14.5178	22.3145	22.4564	15.8076	18.0195	18.767	YDR307W
YDR308C	chrIV	1077867	1078488		76.5889	84.6377	38.1506	42.8158	35.4394	38.6764	43.7322	39.032	39.3747	44.3312	YDR308C
YDR309C	chrIV	1078682	1080247		154.757	168.718	87.8342	92.4654	81.901	82.6812	84.7419	76.5508	76.6964	78.4925	YDR309C
YDR310C	chrIV	1080920	1084518		73.5759	73.2782	40.1483	38.4404	32.3371	38.7689	36.7736	35.0108	35.992	33.8761	YDR310C
YDR311W	chrIV	1085055	1087094		58.6446	58.2693	31.1843	31.7745	25.5884	28.2808	30.0813	28.1982	29.4903	29.0644	YDR311W
YDR312W	chrIV	1087530	1089078	1_RiBi	81.1613	77.8042	49.971	53.6197	35.0903	39.7405	37.2256	38.0908	40.8063	39.7941	YDR312W
YDR313C	chrIV	1089017	1090111		51.0897	52.3357	25.5705	24.5405	22.0891	38.0867	33.1212	22.0495	27.8287	25.3128	YDR313C
YDR315C	chrIV	1092674	1093631		47.7968	55.8433	22.5039	23.6378	23.2299	26.0402	28.255	23.0376	28.2694	28.8055	YDR315C
YDR316W	chrIV	1093734	1095250		59.3792	64.1414	29.0299	33.0437	22.1252	27.0289	30.9243	24.2905	27.9014	28.7681	YDR316W
YDR318W	chrIV	1103740	1105073		57.0124	61.219	28.4108	31.9137	24.9667	34.4158	38.1792	26.8289	32.0457	32.8502	YDR318W
YDR319C	chrIV	1104926	1105904		60.8135	76.1757	30.0908	36.0206	27.8497	31.3759	38.6195	29.3178	34.1621	38.3433	YDR319C
YDR320C	chrIV	1106017	1108126		47.3837	58.0118	23.7113	28.5231	21.9354	25.6586	29.2063	23.2899	24.6761	29.359	YDR320C
YDR320C-A	chrIV	1108199	1108519		119.564	130.956	49.7143	52.397	64.7315	60.3851	73.7699	60.6623	67.7726	73.7015	YDR320C-A
YDR321W	chrIV	1108659	1109936		77.6788	71.6055	39.995	40.415	35.5895	44.0895	37.8589	37.3568	43.0299	35.9132	YDR321W
YDR322W	chrIV	1110561	1111787		55.6519	59.5718	33.2001	34.4499	27.8216	33.5734	34.5265	29.1615	31.8046	33.7659	YDR322W
YDR322C-A	chrIV	1111794	1112340		96.0845	108.597	49.152	56.6941	62.4991	57.6374	73.8827	53.6245	64.9845	75.7465	YDR322C-A
YDR323C	chrIV	1112279	1114053		39.5468	42.7079	17.3219	19.725	23.0158	28.1757	29.1947	21.2056	25.1282	27.8038	YDR323C
YDR324C	chrIV	1114250	1116763	1_RiBi	124.292	118.312	73.1418	77.9745	48.667	52.0492	54.6352	57.2693	58.159	59.6373	YDR324C
YDR325W	chrIV	1117115	1120309		43.727	46.9418	21.3174	22.9174	16.756	20.16	23.8852	18.8135	19.3665	21.3765	YDR325W
YDR326C	chrIV	1120512	1125124		58.7357	62.4742	28.8481	32.2172	21.7537	28.1385	30.8524	25.0546	27.1827	28.2417	YDR326C
YDR328C	chrIV	1125239	1126094		66.2327	74.1616	33.5624	38.2782	37.7414	43.7107	41.9428	33.5299	38.8207	39.0271	YDR328C
YDR329C	chrIV	1126034	1127622		40.6426	41.1347	21.3641	21.5537	22.0765	28.7699	26.5329	20.2048	23.4514	22.4394	YDR329C
YDR330W	chrIV	1127792	1129454		30.1445	36.2291	15.1324	15.2964	16.3682	25.8145	23.2833	16.0288	19.9979	19.3098	YDR330W
YDR331W	chrIV	1129468	1130898		69.9307	71.0913	38.8593	39.8755	34.5071	35.0201	36.8546	34.6371	37.8997	37.7688	YDR331W
YDR332W	chrIV	1130974	1133170		33.0511	36.4119	18.5434	18.4362	15.7505	19.0459	19.3283	15.8886	17.3882	18.1638	YDR332W
YDR333C	chrIV	1133042	1135466		66.1613	65.9464	33.2587	33.5998	28.326	37.8192	35.6865	29.0998	33.4444	30.4516	YDR333C
YDR334W	chrIV	1135766	1140570		76.9455	73.8155	44.5046	40.4296	35.044	41.7635	38.2043	38.1056	42.2603	35.8833	YDR334W
YDR335W	chrIV	1140795	1144933		71.4797	71.0176	32.9081	34.5533	28.113	33.0843	36.0013	30.8362	35.8963	33.9507	YDR335W
YDR336W	chrIV	1145067	1146145		79.4046	83.9897	38.0919	40.2744	42.4919	38.3142	41.853	42.8442	43.4216	46.8324	YDR336W
YDR337W	chrIV	1146254	1147230		66.1128	70.8011	36.1478	33.4008	35.8627	37.297	37.9835	34.498	39.987	35.5582	YDR337W
YDR338C	chrIV	1147242	1149523		39.1902	39.7461	17.3928	18.3014	16.6055	23.8504	22.4599	17.1593	19.0852	20.0706	YDR338C
YDR339C	chrIV	1149843	1150558		149.213	155.781	79.982	88.0758	68.7396	62.7607	75.1139	69.0793	73.9348	81.9756	YDR339C
YDR341C	chrIV	1151636	1153716	1_RiBi	134.119	131.562	75.5937	78.4125	56.5241	53.3079	57.6402	60.056	65.3017	66.6137	YDR341C
YDR342C	chrIV	1154071	1156017		66.4644	71.6325	34.1415	34.2275	58.1773	100.001	91.6699	45.0365	57.8998	56.8056	YDR342C
YDR343C	chrIV	1159563	1161402		66.3678	72.5404	34.1082	34.0003	57.2678	98.3628	89.2118	44.338	57.1089	54.9718	YDR343C
YDR345C	chrIV	1162810	1164690		247.54	230.529	138.548	134.507	156.566	143.421	114.957	153.46	149.708	115.995	YDR345C
YDR346C	chrIV	1166935	1168880		120.354	120.535	59.85	64.1758	45.4792	52.5052	55.234	50.9304	53.4874	55.3556	YDR346C
YDR347W	chrIV	1169059	1170260		80.1101	84.3733	39.8143	42.9477	38.5273	42.3714	44.7544	41.8557	42.7035	45.755	YDR347W
YDR348C	chrIV	1170126	1171963		71.6685	76.6088	39.416	40.5508	32.6729	28.6636	31.9778	33.0828	34.5592	35.0229	YDR348C
YDR349C	chrIV	1172262	1174283		70.02	70.8324	33.1383	35.5862	30.9549	36.8781	35.9761	31.8388	35.0171	34.4424	YDR349C
YDR350C	chrIV	1176048	1178200		55.2384	58.4802	24.6111	27.4651	22.7086	26.3779	30.6345	24.2988	30.1774	30.3044	YDR350C
YDR351W	chrIV	1178443	1181404		81.2404	89.3531	39.7462	44.098	32.2501	37.4031	42.9936	35.7543	38.1852	41.0521	YDR351W
YDR352W	chrIV	1181621	1182987		86.1738	91.517	38.9707	45.2083	38.0286	45.5568	45.4037	40.7796	43.924	45.2249	YDR352W
YDR353W	chrIV	1183205	1184325		151.897	154.631	78.6291	77.7152	107.977	77.7285	77.4389	99.3941	87.9843	93.7067	YDR353W
YDR354W	chrIV	1184619	1185948		56.2089	60.0875	27.5881	29.8878	30.3879	30.2305	26.7245	30.9518	30.2764	28.9402	YDR354W
YDR356W	chrIV	1185993	1189181		51.4148	55.4449	31.0421	32.764	21.3933	27.4535	29.4691	23.8225	25.4783	26.1065	YDR356W
YDR357C	chrIV	1189100	1189736		58.4407	65.6218	28.3381	31.958	34.8094	26.9489	35.4529	34.4242	35.5368	41.2144	YDR357C
YDR358W	chrIV	1190005	1191894		25.7468	36.159	11.3933	12.8308	12.0511	21.8417	24.5244	11.8253	14.1698	16.9973	YDR358W
YDR359C	chrIV	1191859	1195197		64.1926	72.4307	31.7364	35.3338	25.9422	32.7035	38.2151	27.8141	27.3702	32.9051	YDR359C
YDR361C	chrIV	1195158	1196308		108.96	106.944	64.5211	68.0608	53.9738	52.0968	48.3254	55.9439	59.3361	57.5219	YDR361C
YDR362C	chrIV	1196625	1198805		33.0814	37.2547	17.6349	19.279	15.7405	16.8282	18.4553	15.5377	16.3626	17.0274	YDR362C
YDR363W	chrIV	1199001	1201510		38.7072	41.8806	19.2202	23.2948	14.5704	15.383	18.4557	16.9161	17.6984	20.5262	YDR363W
YDR363W-A	chrIV	1202087	1202545		140.188	126.469	60.5631	54.3563	64.5892	58.3592	56.1109	64.1077	74.4068	62.524	YDR363W-A
YDR364C	chrIV	1202493	1204231		66.1902	65.629	35.6137	37.7365	29.8553	34.164	34.3403	31.8541	35.0473	35.0552	YDR364C
YDR365C	chrIV	1204402	1206467		111.579	115.627	80.2729	90.2616	45.4511	50.6543	56.5604	53.6189	55.9875	57.8312	YDR365C
YDR367W	chrIV	1212790	1213650		65.4763	68	34.4157	33.9834	29.1721	32.2285	37.15	33.3749	36.3829	35.7725	YDR367W
YDR368W	chrIV	1213817	1215005		42.743	47.0805	18.2154	22.2368	20.5943	25.7165	27.0204	20.3053	24.7592	26.3151	YDR368W
YDR369C	chrIV	1214946	1217601		25.9786	27.9907	12.2323	12.6149	9.47571	12.3013	12.8146	10.8428	12.0451	12.4843	YDR369C
YDR370C	chrIV	1217725	1219122		67.3616	64.1622	34.3678	34.6252	31.5071	34.3575	33.3407	30.7885	36.1889	37.0686	YDR370C
YDR371W	chrIV	1219333	1221046		31.5537	32.4806	12.8735	14.4326	12.6047	16.6907	18.9677	14.3225	16.8445	17.4871	YDR371W
YDR372C	chrIV	1220967	1222463		83.2516	86.9531	40.1596	44.605	40.794	39.9805	45.9637	41.2602	43.7064	44.6172	YDR372C
YDR373W	chrIV	1222644	1223411		69.4602	69.1263	32.5422	37.3741	31.1126	34.1407	36.9078	32.4405	39.6665	39.205	YDR373W
YDR374W-A	chrIV	1224728	1225254		40.9532	50.0306	16.7001	20.0442	21.4582	20.2237	24.2501	19.7493	21.5455	25.8651	YDR374W-A
YDR375C	chrIV	1225105	1226555		41.1908	47.0581	18.43	20.114	20.052	23.3603	23.8092	19.9208	20.9661	23.5433	YDR375C
YDR376W	chrIV	1226757	1228339		32.793	34.9185	14.3252	15.1473	17.2152	23.0771	25.0248	17.4014	19.5751	20.4365	YDR376W
YDR377W	chrIV	1228514	1229320		124.8	122.98	63.8113	68.5589	82.6007	71.0194	81.3959	78.023	88.5798	89.2903	YDR377W
YDR378C	chrIV	1229138	1229625		100.687	98.3138	43.6535	43.0306	48.2089	45.172	47.1865	46.9282	48.7801	49.4577	YDR378C
YDR379W	chrIV	1230100	1233201		40.1115	49.3231	20.5583	24.4031	17.6963	22.5549	24.7519	18.9544	20.0237	22.6862	YDR379W
YDR379C-A	chrIV	1233110	1233751		40.3613	64.0723	22.411	29.9917	31.7922	37.5276	48.5391	29.6012	35.2722	49.1155	YDR379C-A
YDR380W	chrIV	1234097	1236250		85.5806	130.959	59.798	86.231	70.706	81.8162	103.175	64.5732	72.0228	96.3267	YDR380W
YDR381W	chrIV	1236459	1238196		579.252	585.46	299.158	308.527	270.508	217.875	245.533	273.483	281.371	276.055	YDR381W
YDR381C-A	chrIV	1238182	1239120		67.2781	67.2557	27.3844	28.3876	33.1178	39.1117	41.6512	35.1785	39.387	37.2955	YDR381C-A
YDR382W	chrIV	1239409	1239970	2_RPG	513.567	332.068	285.593	208.7	312.789	169.979	170.271	319.703	222.639	193.339	YDR382W
YDR383C	chrIV	1239879	1240701		135.491	115.851	69.8658	56.3705	65.72	58.5675	58.792	74.3618	66.0414	59.2432	YDR383C
YDR384C	chrIV	1241041	1242174		110.076	70.1458	71.794	43.6022	44.5158	32.847	23.4976	51.1658	36.2392	22.8491	YDR384C
YDR385W	chrIV	1243121	1245910	1_RiBi	457.232	358.562	264.715	220.443	228.692	153.382	162.258	227.742	194.094	184.672	YDR385W
YDR386W	chrIV	1246071	1248125		24.5004	28.172	12.5409	14.2304	12.0514	13.206	14.8998	12.7951	14.1479	14.4313	YDR386W
YDR387C	chrIV	1248046	1249965		36.9657	41.3482	14.2038	15.8114	16.2381	22.8928	24.2755	16.4567	18.618	19.5959	YDR387C
YDR388W	chrIV	1250133	1251756		59.4543	71.5829	29.2287	33.0566	29.6848	39.9672	43.9734	27.778	30.1696	34.8891	YDR388W
YDR389W	chrIV	1252013	1254816		75.0745	75.831	37.2024	40.8113	30.7555	41.1609	38.7959	33.0731	35.8591	33.8806	YDR389W
YDR390C	chrIV	1254783	1256874		51.6612	53.579	23.8347	26.5652	20.9929	26.4485	27.7277	22.3707	26.2896	25.8255	YDR390C
YDR391C	chrIV	1257237	1258480	3_MSN2	33.9998	41.505	14.9273	17.4271	20.2935	28.0791	33.5304	17.3762	22.1288	25.0923	YDR391C
YDR393W	chrIV	1259830	1261449		81.3758	84.2633	37.5034	39.6435	39.4961	50.0576	48.4945	40.6358	45.3873	43.7753	YDR393W
YDR394W	chrIV	1261575	1263054		125.084	114.256	59.6289	57.4604	57.8471	79.6519	66.5949	57.8176	68.1045	57.9391	YDR394W
YDR395W	chrIV	1263188	1266247		112.268	98.6077	64.3867	60.9426	45.0202	53.3365	50.5843	51.7469	52.2962	48.355	YDR395W
YDR397C	chrIV	1266265	1266986		100.089	100.276	50.3216	57.7877	47.3388	45.8374	47.6907	47.9065	47.9583	49.1155	YDR397C
YDR398W	chrIV	1267394	1269521	1_RiBi	126.782	132.254	78.8188	89.1037	56.8903	63.0344	63.6746	62.366	63.3853	62.5879	YDR398W
YDR399W	chrIV	1269976	1270846	1_RiBi	324.597	367.99	167.241	185.679	144.956	127.257	128.757	156.532	132.242	153.865	YDR399W
YDR400W	chrIV	1270985	1272235		40.3652	46.0281	18.8702	20.8124	17.4835	31.2543	28.1413	18.3696	21.266	23.0438	YDR400W
YDR402C	chrIV	1272198	1273744		10.5155	13.669	4.78931	5.7942	3.68563	18.3747	13.4539	4.30887	7.04032	5.40935	YDR402C
YDR403W	chrIV	1274558	1276243		14.9812	19.6188	6.51569	9.16066	5.83102	18.4135	14.7935	6.33604	8.50809	9.82804	YDR403W
YDR404C	chrIV	1276509	1277374		99.3823	111.955	45.4999	49.5145	48.0228	53.5808	59.1238	47.9032	53.4937	54.7796	YDR404C
YDR405W	chrIV	1277570	1278573		87.9786	98.6866	41.8002	46.637	51.075	57.5662	54.9342	44.3729	50.02	54.1518	YDR405W
YDR406W	chrIV	1279078	1283925		21.4554	26.1336	9.42501	9.41132	12.4801	17.3864	17.1991	11.4638	14.6864	15.1018	YDR406W
YDR407C	chrIV	1283997	1288042		43.5817	42.587	19.1191	20.4178	18.2992	23.1388	23.0531	19.1467	20.8087	20.1756	YDR407C
YDR408C	chrIV	1288042	1288942		101.11	113.374	43.239	51.2267	55.478	65.3579	62.1853	51.3771	55.7655	61.9137	YDR408C
YDR409W	chrIV	1289365	1292361		46.1279	46.9108	22.9022	23.3257	20.9464	33.8595	31.5728	21.1109	25.1098	23.3219	YDR409W
YDR410C	chrIV	1292346	1293159		92.9829	101.154	44.8944	49.4149	47.6259	50.7543	52.9679	49.1589	50.9813	55.2979	YDR410C
YDR411C	chrIV	1293303	1294442		43.0876	51.1099	16.8968	18.2901	22.2521	29.0222	28.3728	20.8745	24.0797	24.5206	YDR411C
YDR412W	chrIV	1294624	1295542		102.672	109	65.0315	70.9427	47.1408	47.7243	51.5238	48.295	50.5877	54.2318	YDR412W
YDR414C	chrIV	1295416	1296912		42.1899	40.2533	21.2799	20.8439	17.8478	23.1681	21.0077	19.9168	21.7272	19.9584	YDR414C
YDR415C	chrIV	1296956	1298214		54.1758	57.0398	25.7826	25.1488	27.1574	29.6169	30.6735	27.5089	29.9322	31.4629	YDR415C
YDR416W	chrIV	1298367	1301044		80.0119	51.7622	40.5441	27.38	41.7078	27.0132	23.5803	43.7537	32.107	24.9282	YDR416W
YDR418W	chrIV	1301580	1302214	2_RPG	743.667	272.474	411.327	147.728	427.785	127.079	74.809	395.138	243.741	135.374	YDR418W
YDR419W	chrIV	1303123	1305434		25.9288	26.9038	12.806	13.6646	12.1536	13.2639	13.9877	12.7749	13.0485	14.8557	YDR419W
YDR420W	chrIV	1305984	1311813		82.148	97.3038	39.2792	49.6813	31.6874	35.8849	44.5247	34.0107	34.7413	41.3727	YDR420W
YDR421W	chrIV	1311962	1315147		29.3523	33.0003	14.6754	15.2897	11.9759	21.5288	19.7566	12.9397	13.9773	14.7409	YDR421W
YDR422C	chrIV	1315033	1317827		56.7536	57.7918	26.4464	26.8896	23.9248	38.6192	39.7032	24.108	28.3289	26.8985	YDR422C
YDR423C	chrIV	1317975	1319275		67.0281	74.0403	32.7034	34.5929	33.3563	42.4177	43.8037	33.8547	34.7569	37.5101	YDR423C
YDR424C	chrIV	1319357	1319896		125.516	139.449	55.1432	58.0261	72.516	74.7017	76.4621	71.3738	78.2436	82.3731	YDR424C
YDR425W	chrIV	1320012	1322025		35.5937	38.2121	16.8949	16.6717	16.8638	21.9364	22.5483	16.5978	19.4887	18.5792	YDR425W
YDR427W	chrIV	1322160	1323484		147.536	128.829	78.2036	74.5438	64.4628	97.5037	80.0941	68.1283	85.5635	67.8196	YDR427W
YDR428C	chrIV	1323446	1324270		61.2768	61.9818	27.799	28.057	27.8544	57.7568	41.5962	29.1042	32.4742	31.2306	YDR428C
YDR429C	chrIV	1324372	1325341	1_RiBi	213.203	216.926	137.336	144.633	107.513	109.018	116.838	106.454	113.63	113.081	YDR429C
YDR430C	chrIV	1325276	1328550		56.0858	58.1563	27.4687	27.6712	27.8672	34.6199	34.8438	29.5442	30.9081	30.0996	YDR430C
YDR432W	chrIV	1328738	1330453	1_RiBi	327.6	350.336	193.715	213.874	162.302	190.84	193.323	157.498	176.216	173.109	YDR432W
YDR434W	chrIV	1331139	1332957		39.9199	44.2019	19.9103	22.1907	17.5296	18.7199	21.4592	19.02	19.1871	22.4526	YDR434W
YDR435C	chrIV	1332818	1333995		28.4753	33.6439	12.8391	14.5125	13.0667	18.7323	20.9132	13.0123	15.1001	17.8978	YDR435C
YDR436W	chrIV	1334566	1337068	3_MSN2	30.3517	35.2538	13.406	14.7092	14.4542	19.1978	20.7753	13.3923	15.8391	17.0336	YDR436W
YDR439W	chrIV	1339573	1340829		40.2719	43.9321	20.8288	21.4731	18.2121	21.4092	23.2266	19.3896	20.4217	23.0882	YDR439W
YDR440W	chrIV	1342389	1344347		39.9314	39.4575	19.7518	20.5627	16.2915	22.1199	20.0999	17.8196	19.8007	17.6825	YDR440W
YDR441C	chrIV	1344386	1345209		104.51	97.2465	46.2848	45.2213	43.7187	53.8357	43.7139	45.6313	49.2792	45.9558	YDR441C
YDR443C	chrIV	1345128	1349966		26.5873	27.7045	13.8037	13.3141	13.4635	17.2566	16.4148	14.5246	14.9417	15.0702	YDR443C
YDR444W	chrIV	1350196	1352393		44.2822	42.9624	20.2425	21.4016	18.3264	21.7289	22.5317	18.6849	19.4691	20.4535	YDR444W
YDR447C	chrIV	1354709	1355586	2_RPG	593.579	232.615	359.462	146.919	282.986	90.001	63.8584	289.589	173.171	105.803	YDR447C
YDR448W	chrIV	1356038	1357435		68.1205	58.2965	32.7764	28.715	32.6086	44.3888	35.0824	32.4382	31.5479	28.3417	YDR448W
YDR449C	chrIV	1357388	1358955	1_RiBi	111.045	91.3283	65.7702	61.403	45.0526	47.2894	47.982	51.2808	50.8459	46.4087	YDR449C
YDR450W	chrIV	1359856	1360916	2_RPG	549.919	216.652	349.953	132.803	299.443	104.733	73.3965	300.821	184.812	110.811	YDR450W
YDR451C	chrIV	1360905	1362241		107.597	122.538	40.9464	48.4809	48.3366	45.1183	47.8359	50.2174	51.9885	55.4672	YDR451C
YDR452W	chrIV	1362726	1364940		86.1752	82.6785	36.8526	34.437	37.6493	46.4945	44.1209	37.91	40.9095	36.5452	YDR452W
YDR453C	chrIV	1364986	1365742		33.751	33.8065	16.0349	17.3675	22.4192	23.8107	20.0742	21.0476	22.3478	21.4738	YDR453C
YDR454C	chrIV	1366158	1366862		96.2492	88.2681	47.5425	49.6191	53.3875	51.0258	48.6698	54.0657	56.1367	54.4059	YDR454C
YDR456W	chrIV	1367417	1369455		37.6574	37.4846	17.4936	17.2921	16.7718	23.7884	23.7671	17.7982	20.2404	18.912	YDR456W
YDR457W	chrIV	1369674	1379673		58.7239	58.1068	29.7039	30.5601	24.9454	30.5252	31.2385	27.631	29.0842	28.0977	YDR457W
YDR458C	chrIV	1379878	1382093		60.7091	62.1831	31.5699	34.2117	26.2105	35.9065	37.9437	28.6669	32.681	33.8296	YDR458C
YDR459C	chrIV	1382213	1383537		46.878	52.2552	20.3518	23.1955	25.0977	28.1914	28.7271	24.7856	25.1661	29.5235	YDR459C
YDR460W	chrIV	1383669	1384916	1_RiBi	46.4736	48.1055	23.2215	25.7463	43.3589	42.51	47.2263	43.2821	41.3373	43.8298	YDR460W
YDR461W	chrIV	1385151	1385432		2.3669	2.07655	1.06164	1.39925	75.2068	42.5225	57.6613	68.902	55.8372	66.5541	YDR461W
YDR461C-A	chrIV	1385353	1385822		5.90529	8.33213	2.54612	3.18384	19.1458	19.6368	19.8144	16.3615	13.8084	17.7398	YDR461C-A
YDR462W	chrIV	1386009	1386639		89.2989	87.1946	42.2692	43.2018	52.6307	70.0695	67.3106	47.4154	54.0698	54.3415	YDR462W
YDR463W	chrIV	1386759	1388585		87.0845	82.6562	44.5394	43.3419	42.0596	46.4801	47.8282	43.242	40.227	42.4253	YDR463W
YDR464W	chrIV	1388752	1393245		50.0741	52.5671	28.9539	33.0713	20.3826	24.6003	25.92	23.1506	23.9144	23.7095	YDR464W
YDR465C	chrIV	1393154	1394640		75.3386	71.3497	51.0192	59.1319	30.9069	38.2086	35.7542	36.8068	36.6362	38.1224	YDR465C
YDR466W	chrIV	1395005	1397857		51.3701	52.1145	26.0433	26.2207	23.9678	43.8798	42.4595	25.04	31.3312	27.7509	YDR466W
YDR468C	chrIV	1397927	1398858		76.5989	80.5097	38.3262	38.4969	36.8045	39.4552	43.8204	40.961	37.7164	40.0599	YDR468C
YDR469W	chrIV	1398973	1399822		63.1285	60.1663	33.5256	30.1695	31.3831	27.709	29.2206	32.0804	30.5155	28.4706	YDR469W
YDR470C	chrIV	1399574	1401303		33.1838	31.5701	15.1969	13.9993	14.757	22.4341	21.4478	15.2838	15.9109	16.1752	YDR470C
YDR471W	chrIV	1401609	1402682	2_RPG	553.075	211.032	321.655	110.071	327.765	118.415	74.042	327.054	183.068	109.787	YDR471W
YDR472W	chrIV	1403195	1404312		136.663	150.255	64.109	67.281	63.61	77.6323	71.441	68.3878	60.454	69.3855	YDR472W
YDR473C	chrIV	1404269	1405920		40.572	42.071	22.7682	23.9448	18.3929	25.0563	23.3886	20.0492	19.678	21.1436	YDR473C
YDR475C	chrIV	1407350	1410190		37.6249	40.5566	17.6247	18.7113	17.6097	28.4874	29.0878	17.9961	21.1594	21.5983	YDR475C
YDR476C	chrIV	1410252	1411190	3_MSN2	60.4123	74.1206	27.2604	31.7419	42.2952	48.2367	45.0088	35.0401	36.3576	44.1273	YDR476C
YDR477W	chrIV	1412077	1414393		65.6601	74.1482	32.066	34.6976	28.9477	41.9459	44.3347	29.0945	36.1179	36.0956	YDR477W
YDR478W	chrIV	1414536	1415237		62.6269	62.56	35.2372	39.2036	30.5513	35.1563	32.8271	33.2452	32.7456	33.3058	YDR478W
YDR479C	chrIV	1415125	1416934		48.7604	55.7726	20.8426	23.8701	21.4433	33.4986	34.6392	22.4593	27.2689	26.3114	YDR479C
YDR480W	chrIV	1417332	1418695		42.2701	50.5423	19.5241	22.1365	19.5958	22.9077	24.8129	18.4176	21.5694	22.4397	YDR480W
YDR481C	chrIV	1418439	1420303		56.3302	67.0518	20.0327	22.9806	23.1976	34.9168	30.8105	20.8086	24.1423	24.8369	YDR481C
YDR482C	chrIV	1420325	1420945		49.4959	61.6585	21.4287	26.7363	30.1762	40.4337	34.1977	28.3256	28.9313	34.6493	YDR482C
YDR483W	chrIV	1421106	1422598		105.553	121.208	49.067	58.6527	43.877	47.4993	53.5704	47.0238	49.0593	56.3625	YDR483W
YDR484W	chrIV	1422732	1424783		35.0265	35.7743	16.6586	17.9158	15.9908	19.8937	19.6294	16.0921	19.0571	18.8153	YDR484W
YDR485C	chrIV	1424665	1427248		54.9362	60.8097	32.4277	35.2902	23.8044	31.1537	32.9195	25.081	27.923	28.079	YDR485C
YDR486C	chrIV	1427313	1428165		75.3822	86.3184	35.3444	37.802	36.6948	48.6473	49.8888	37.0464	43.5053	46.8506	YDR486C
YDR487C	chrIV	1428249	1429057		93.1333	106.795	39.2386	51.6941	45.9294	54.4395	52.7532	42.3057	46.3785	52.8224	YDR487C
YDR488C	chrIV	1429098	1430790		20.8709	25.1297	9.49707	12.4234	10.9331	19.5818	17.0701	10.1789	10.1587	12.1885	YDR488C
YDR489W	chrIV	1430992	1432183		59.7686	66.9047	30.335	32.3203	28.3564	37.354	36.948	28.1949	30.4194	31.2464	YDR489W
YDR490C	chrIV	1431803	1434351		27.988	34.0119	11.665	13.5045	13.1128	27.7242	25.3355	13.5068	15.5239	15.7564	YDR490C
YDR492W	chrIV	1434768	1435966		79.7736	101.946	52.3441	71.6424	46.5951	53.2048	55.0064	52.25	43.3307	57.8409	YDR492W
YDR493W	chrIV	1436098	1436690		78.4523	75.2836	28.7028	31.919	37.4429	43.2004	39.7099	36.7748	35.9014	39.7456	YDR493W
YDR494W	chrIV	1436864	1438088		70.5004	77.6079	36.0009	38.4331	34.2946	44.495	45.8194	33.4147	38.3125	40.3796	YDR494W
YDR495C	chrIV	1437919	1441210		30.0324	32.071	15.8965	17.3841	13.6171	19.1039	18.3696	15.1614	14.8734	16.5181	YDR495C
YDR496C	chrIV	1441356	1443439	1_RiBi	174.511	166.77	118.891	126.37	71.9619	80.7838	83.8449	82.9978	88.4382	85.7361	YDR496C
YDR497C	chrIV	1443607	1445566		143.436	143.575	67.2124	66.9047	70.2666	67.8069	63.1048	67.4455	57.9483	60.9386	YDR497C
YDR498C	chrIV	1445768	1447035		55.0125	60.9089	30.9901	33.6175	30.0002	35.6624	37.1863	28.0579	30.9196	32.3672	YDR498C
YDR499W	chrIV	1447800	1450188		48.4633	39.4334	22.5391	19.5543	18.1916	22.473	20.6458	19.5455	19.3122	18.7429	YDR499W
YDR500C	chrIV	1450105	1450871	2_RPG	439.213	238.144	269.803	141.397	223.598	113.468	107.811	229.772	154.384	124.275	YDR500C
YDR501W	chrIV	1451326	1453059		34.108	37.6892	14.5708	15.3513	14.5241	23.5221	21.3821	14.5689	13.7727	14.1456	YDR501W
YDR502C	chrIV	1453014	1454519		153.967	150.391	61.5502	61.9272	65.6373	62.8396	58.6817	59.4421	49.9531	57.9609	YDR502C
YDR503C	chrIV	1454828	1455947		47.6071	49.5313	18.999	20.4491	24.5707	31.8811	28.8642	21.0548	24.8413	24.9653	YDR503C
YDR505C	chrIV	1456587	1459499		49.6759	53.6046	20.7238	21.7086	21.9915	29.2052	31.6926	22.3761	23.5946	25.4301	YDR505C
YDR506C	chrIV	1459245	1461570		36.0855	36.8342	16.6472	17.0183	22.3342	26.4183	23.0058	20.5204	19.7171	21.4702	YDR506C
YDR507C	chrIV	1462176	1465906		91.6574	104.272	50.1705	56.0858	41.2535	41.8132	45.5292	44.3319	41.3354	44.3645	YDR507C
YDR508C	chrIV	1466225	1468486		262.452	262.589	117.981	114.947	123.796	136.652	133.611	130.103	128.66	125.368	YDR508C
YDR510W	chrIV	1469313	1469837		166.467	171.882	74.2311	73.33	96.0542	102.49	101.518	88.8922	96.3693	98.1965	YDR510W
YDR511W	chrIV	1469970	1470505		71.3078	82.9684	29.7936	34.315	42.941	46.5208	53.6955	40.9999	44.4527	51.171	YDR511W
YDR512C	chrIV	1470414	1471063		61.2261	72.5801	21.8318	26.6303	37.0148	44.4171	46.52	33.1328	38.7437	39.8057	YDR512C
YDR513W	chrIV	1470993	1471549		76.975	95.989	32.42	34.5837	42.7039	52.7933	59.7886	38.3195	46.2558	54.4975	YDR513W
YDR514C	chrIV	1471497	1473058		62.8954	63.1068	37.1776	39.2093	27.2914	32.487	33.9914	31.1152	32.9722	32.1566	YDR514C
YDR515W	chrIV	1473200	1474805		48.4853	46.7354	27.3716	27.2213	21.1624	27.6242	25.3117	23.1638	28.6884	23.9509	YDR515W
YDR516C	chrIV	1474854	1476586		31.1447	39.4988	10.2799	13.4522	16.9377	27.9405	28.2669	14.8272	18.5098	19.7097	YDR516C
YDR517W	chrIV	1477123	1478463		50.4092	52.7341	20.5086	18.9733	25.9395	36.7092	32.1233	23.3298	26.414	24.32	YDR517W
YDR518W	chrIV	1478557	1480211		25.441	32.2616	10.8054	13.5432	10.4711	26.2778	22.8419	10.9231	13.2958	14.427	YDR518W
YDR519W	chrIV	1480354	1481013		72.9976	77.4417	31.612	37.8475	39.5738	43.8131	47.6044	39.8785	40.9595	42.6729	YDR519W
YDR520C	chrIV	1480963	1483487		47.3719	48.2193	23.5528	26.8635	20.5668	34.2882	32.4653	22.5233	25.7359	24.4493	YDR520C
YDR524C	chrIV	1487269	1489055		80.7778	82.7015	36.9038	37.82	35.6061	43.2564	45.0663	37.0971	38.4551	41.7926	YDR524C
YDR524W-C	chrIV	1489242	1489592		450.778	428.08	363.158	404.795	349.142	285.968	324.457	375.805	305.287	330.779	YDR524W-C
YDR524C-B	chrIV	1489440	1489841		1341.32	1439.44	648.469	782.76	859.649	553.112	715.7	719.776	660.649	775.936	YDR524C-B
YDR525W-A	chrIV	1490508	1490898		148.072	189.786	54.1624	72.9798	100.865	110.307	119.241	89.7956	90.8957	113.079	YDR525W-A
YDR527W	chrIV	1491027	1492438		105.093	111.836	56.3324	65.0981	44.0386	71.0387	61.6254	51.0716	53.6118	53.2715	YDR527W
YDR528W	chrIV	1494266	1495962		93.8358	103.228	50.0019	54.2834	48.4355	65.2536	59.8637	49.3801	54.8965	51.1224	YDR528W
YDR529C	chrIV	1495971	1496603		148.738	170.223	79.3622	79.3419	113.757	114.827	134.703	101.609	113.077	121.399	YDR529C
YDR530C	chrIV	1496671	1497914		57.1013	71.7214	28.6011	32.1793	42.4694	51.7758	49.4347	37.2516	40.2231	44.3637	YDR530C
YDR531W	chrIV	1498177	1499417		59.8246	52.4583	24.7654	28.282	25.2066	33.2603	33.6563	27.4288	32.7302	28.1285	YDR531W
YDR532C	chrIV	1499353	1500603		53.67	58.6503	26.8945	31.3993	23.0129	26.5466	30.5924	25.9352	27.58	29.9828	YDR532C
YDR533C	chrIV	1501358	1502222	3_MSN2	46.6224	66.6383	19.6611	26.2451	28.9744	37.8107	39.6758	26.9832	30.4929	38.7071	YDR533C
YDR536W	chrIV	1507788	1509798		19.3209	21.7185	8.80679	10.3444	8.57389	15.7534	14.9579	9.19412	11.9247	10.994	YDR536W
YDR541C	chrIV	1519524	1520932		26.4272	28.5561	13.2414	14.3327	11.6969	17.5264	17.6581	11.1832	11.7691	13.1996	YDR541C
YDR542W	chrIV	1523229	1523700		0.517919	0.363185	0.0800849	0.124352	0.137197	0.886476	0.549512	0.0858386	0.297304	0.227431	YDR542W
YDR545W	chrIV	1525837	1531770		0.00151694	0.00464858	0.0984123	0.12908	0.121155	0.196996	0.177067	0.102914	0.132607	0.124959	YDR545W
YIL177C	chrIX	448	6620		0.804817	1.06508	0.933142	1.09302	0.977019	1.07533	1.07938	0.926748	0.883202	0.933995	YIL177C
YIL176C	chrIX	8759	9173		0.456667	0.460121	0.378478	0.445821	0.271353	0.960918	0.777681	0.309686	0.363575	0.350966	YIL176C
YIL173W	chrIX	11491	16427		30.5746	31.1219	14.3928	15.7304	12.1832	15.1144	15.8954	12.9521	13.1679	13.704	YIL173W
YIL172C	chrIX	16699	18660		8.22808	10.0105	3.5338	3.71796	3.88198	8.77109	7.93092	4.09866	4.7773	5.15852	YIL172C
YIL169C	chrIX	22895	26159		275.1	350.815	160.346	210.967	149.093	98.3279	158.093	134.281	115.885	148.958	YIL169C
YIL164C	chrIX	33616	35009		34.7042	36.7253	14.3929	16.2157	16.6568	21.6574	21.3416	15.7544	19.4118	18.5039	YIL164C
YIL162W	chrIX	37345	39126		28.8727	30.6117	12.6349	13.8172	13.3473	16.6118	17.0696	12.2479	14.2748	16.5189	YIL162W
YIL161W	chrIX	39422	40174		78.4875	90.8863	44.8703	53.6352	36.0898	31.9001	41.7139	36.7678	40.885	46.8826	YIL161W
YIL160C	chrIX	40207	41478		22.3174	22.8699	10.6151	12.2295	8.49669	15.1685	15.4251	9.54286	10.9449	11.8476	YIL160C
YIL159W	chrIX	41809	46071		47.4673	48.6573	23.6546	25.7219	22.6143	24.1063	24.9584	24.7758	24.2178	25.3632	YIL159W
YIL158W	chrIX	46189	46910		107.318	110.318	56.1095	66.417	58.8307	38.8128	46.171	57.5758	57.6906	66.7566	YIL158W
YIL157C	chrIX	46740	47575		51.2442	57.7356	23.9291	26.8321	28.0207	27.9905	32.6579	26.28	28.1439	32.3269	YIL157C
YIL156W-B	chrIX	47666	48055		64.1008	70.5621	29.4197	27.6953	39.0724	39.433	39.8393	35.8213	41.5659	44.6421	YIL156W-B
YIL155C	chrIX	51499	53778		28.955	34.2604	10.5159	10.7472	14.987	26.3665	23.3925	12.8173	16.2345	16.0658	YIL155C
YIL154C	chrIX	53910	55072		53.4411	68.6777	24.124	27.9914	36.6511	45.1905	43.99	27.4587	31.555	34.3189	YIL154C
YIL153W	chrIX	55164	56425		40.2946	42.6059	16.7996	19.3012	21.8537	28.5095	25.6769	18.8592	20.4953	22.4804	YIL153W
YIL152W	chrIX	56528	57382		44.3377	49.646	18.3681	20.3046	23.0633	24.2784	27.0366	22.6245	21.8159	24.5935	YIL152W
YIL150C	chrIX	60896	62761		48.1722	42.6359	28.1725	25.5033	21.589	21.0127	20.2618	23.0131	23.1961	22.3229	YIL150C
YIL149C	chrIX	62930	68208		68.1344	67.8396	39.6194	40.299	27.5371	33.5383	35.9284	31.6543	33.7534	32.264	YIL149C
YIL148W	chrIX	68681	69594	2_RPG	748.186	271.751	406.584	145.017	358.325	107.991	73.5499	358.581	223.214	125.137	YIL148W
YIL147C	chrIX	69500	73668		59.7419	49.7835	30.7082	26.1975	26.0703	22.6806	22.4559	28.8035	25.2594	22.5913	YIL147C
YIL146C	chrIX	74077	75945		26.1247	29.0505	12.1107	12.4136	10.4823	24.1154	23.0755	11.4805	16.2982	14.1812	YIL146C
YIL145C	chrIX	75930	77355		78.9417	79.919	35.5743	39.3238	37.5901	40.7489	40.4466	39.8354	42.0839	40.6845	YIL145C
YIL144W	chrIX	77993	80377		73.2549	77.3926	36.3192	41.7579	29.3377	30.6659	35.9782	32.2716	33.8337	35.296	YIL144W
YIL143C	chrIX	80287	83077		55.0144	58.3251	27.8795	30.651	25.1348	32.8979	32.9881	25.9534	29.2972	28.6114	YIL143C
YIL142W	chrIX	83264	84939		170.767	180.827	89.3819	99.4174	87.265	87.3334	84.4301	85.9444	87.7149	85.2091	YIL142W
YIL140W	chrIX	85215	87885		58.4032	72.9186	29.6317	34.4835	29.1713	37.7034	35.7212	28.7099	28.7775	29.8586	YIL140W
YIL139C	chrIX	87878	88736		43.0183	44.5612	20.7366	20.578	20.0521	24.0054	21.5799	23.5124	21.0096	22.2179	YIL139C
YIL138C	chrIX	88878	89744		106.738	118.724	61.319	62.7452	51.4795	44.4923	52.686	54.834	54.6185	59.5361	YIL138C
YIL137C	chrIX	89878	92836		44.0781	46.9854	20.8194	22.0138	19.8446	20.2734	21.55	21.6873	20.9691	22.2373	YIL137C
YIL136W	chrIX	93574	94885		36.1128	41.6341	16.1098	17.2613	24.1923	24.9877	30.2493	19.4979	18.7817	23.2274	YIL136W
YIL135C	chrIX	94921	96432		58.0404	58.8846	25.8788	24.8039	27.1664	30.9383	30.5639	26.844	27.6283	26.9006	YIL135C
YIL134W	chrIX	97334	98505		94.5775	73.2733	50.6558	38.6336	48.1261	42.9467	35.3036	52.6686	39.7764	34.9927	YIL134W
YIL133C	chrIX	98426	99433	2_RPG	579.298	196.249	355.887	115.713	307.07	90.4806	56.7491	318.685	173.529	93.0788	YIL133C
YIL132C	chrIX	99703	100561		42.5247	26.3808	19.5093	11.9087	24.7464	18.1987	14.6688	25.7371	16.7476	15.2873	YIL132C
YIL131C	chrIX	100718	102328		43.0242	43.5277	20.5921	19.9827	20.8544	18.8271	18.8564	20.4909	19.4115	19.4085	YIL131C
YIL130W	chrIX	102630	105760		92.4117	92.5408	50.7701	51.5301	38.5965	37.828	41.7898	43.88	41.3556	43.5306	YIL130W
YIL129C	chrIX	106022	113344		37.0387	36.5255	15.9245	16.1486	15.5317	20.0254	20.0592	17.1565	18.1853	17.9114	YIL129C
YIL128W	chrIX	113721	116950		67.5998	67.2975	34.2409	37.2341	29.4457	50.6012	46.3919	32.8008	43.8643	35.4653	YIL128W
YIL127C	chrIX	116990	117683		133.985	132.513	79.8098	89.0283	56.46	53.3684	56.1595	62.7079	67.1439	66.7302	YIL127C
YIL126W	chrIX	117909	122207		93.1401	95.2805	53.6247	58.0572	40.9276	40.5093	46.3527	44.8433	43.7012	45.2876	YIL126W
YIL125W	chrIX	122394	125819		49.883	59.0633	22.8875	23.9608	29.0392	35.6806	40.0855	27.997	30.872	33.6031	YIL125W
YIL124W	chrIX	126145	127199		78.4912	97.1402	30.1888	36.5914	40.5668	41.3274	48.1558	36.6602	39.473	48.7188	YIL124W
YIL123W	chrIX	127661	129919		136.187	185.379	68.4732	89.569	69.1142	67.6788	80.6789	64.7161	59.4636	79.0534	YIL123W
YIL122W	chrIX	130307	131818		36.2959	40.2824	21.9947	24.192	20.0503	26.2426	25.3245	19.5921	23.1041	24.0461	YIL122W
YIL121W	chrIX	132218	133999		11.0086	14.7725	5.01705	6.13842	4.52401	12.3728	10.4408	4.66189	6.4331	6.68714	YIL121W
YIL120W	chrIX	134298	136199		83.1886	100.013	41.8279	49.6264	54.1876	52.2738	55.7485	54.0138	53.5022	64.2609	YIL120W
YIL119C	chrIX	136408	137903		44.65	57.3431	25.1056	30.0064	29.8528	33.7879	34.2921	30.8677	28.9929	33.8694	YIL119C
YIL118W	chrIX	139601	140489		117.876	133.498	56.4379	66.7711	54.1528	61.7628	59.5302	56.6595	61.3946	69.4745	YIL118W
YIL117C	chrIX	140536	141634		95.6896	130.043	44.6249	63.3266	34.27	48.607	51.8229	35.0685	39.8145	49.6022	YIL117C
YIL116W	chrIX	142842	144180		62.5101	71.1691	26.6341	28.7238	29.1717	35.1599	32.6299	31.0053	33.789	33.2205	YIL116W
YIL115C	chrIX	144264	148888		63.3725	62.9547	30.9067	32.2979	26.8002	32.1127	34.1251	28.3848	29.5304	29.0222	YIL115C
YIL114C	chrIX	149130	150020		49.7941	57.2027	19.7963	24.8023	21.1331	30.5559	28.6549	21.3396	25.9669	27.2277	YIL114C
YIL113W	chrIX	150526	151293		29.5755	34.9927	9.61017	12.3596	12.5838	17.5583	18.6979	11.5609	14.9649	17.3947	YIL113W
YIL112W	chrIX	151550	154935		59.5509	64.8701	28.8934	33.0584	25.1731	40.507	43.2255	27.7679	31.3847	31.5604	YIL112W
YIL111W	chrIX	155151	155799		85.3777	109.069	35.7525	39.8579	42.3384	66.408	77.4339	41.3666	53.8169	58.2534	YIL111W
YIL110W	chrIX	156013	157291		65.2128	67.9961	34.8789	34.5696	29.1987	39.5747	34.5817	32.8793	34.0896	31.7346	YIL110W
YIL109C	chrIX	157270	160272		91.141	109.059	45.2101	54.0546	43.6972	58.3712	63.1565	44.0646	48.1907	50.7612	YIL109C
YIL108W	chrIX	160672	163050		53.2524	70.4138	24.385	29.8832	27.0781	37.4634	41.4794	26.7925	31.4608	35.8832	YIL108W
YIL107C	chrIX	162885	165942		32.0328	42.8928	13.3908	18.9694	13.3719	21.5006	24.1529	13.3752	17.5207	18.7026	YIL107C
YIL106W	chrIX	166398	167527		85.562	101.225	46.6915	57.1991	44.2721	43.7194	53.7507	47.9609	45.5487	57.1741	YIL106W
YIL105C	chrIX	167412	169781		59.6446	64.855	26.6807	28.5631	26.1037	38.0195	37.4694	28.2519	30.9695	31.0879	YIL105C
YIL104C	chrIX	169906	171558	1_RiBi	62.4555	60.7403	37.5284	39.9629	26.7652	31.5357	30.4266	31.2836	28.1355	31.2549	YIL104C
YIL103W	chrIX	171661	173102		72.5163	70.1483	40.259	40.379	30.9997	38.9003	35.7441	35.0786	35.8675	33.6619	YIL103W
YIL101C	chrIX	175288	177451		13.0559	19.5487	6.53983	9.15186	7.94101	10.9904	11.5771	6.59102	7.37456	9.43461	YIL101C
YIL099W	chrIX	177978	179663		7.45264	9.8982	2.9177	3.68779	3.64343	4.86134	5.13738	3.02997	3.1871	4.15582	YIL099W
YIL098C	chrIX	179681	180281		54.032	60.6058	26.0319	27.3085	30.0625	31.4697	35.6542	28.9873	30.9587	36.6366	YIL098C
YIL097W	chrIX	180400	182069		21.7989	26.5795	9.50429	10.4423	9.38715	13.3347	15.3128	10.7079	11.5255	13.5742	YIL097W
YIL096C	chrIX	181975	183192		43.2628	39.4175	27.0405	30.0982	18.608	21.9002	19.5038	22.6509	23.0757	21.2285	YIL096C
YIL095W	chrIX	183767	186444		41.5786	44.0148	18.0104	20.5016	17.7166	28.5823	27.1548	18.6965	19.621	21.2589	YIL095W
YIL094C	chrIX	186308	187673		120.296	132.203	60.7138	67.1648	63.2556	52.938	54.3212	67.6168	62.2893	71.454	YIL094C
YIL093C	chrIX	187890	188946		110.8	121.423	55.1489	61.8493	70.4227	65.3079	63.4807	67.148	65.3932	72.7276	YIL093C
YIL092W	chrIX	189011	191083		43.5859	41.2084	21.2123	23.0501	18.1697	28.3866	25.0858	20.0126	22.0635	20.3106	YIL092W
YIL091C	chrIX	190991	193243	1_RiBi	107.779	109.649	69.1574	78.0423	45.474	55.3922	57.322	53.4296	55.2894	55.022	YIL091C
YIL090W	chrIX	193456	195429		69.5885	68.7301	35.325	36.7977	31.6685	35.4296	36.7174	33.9691	34.6116	34.4362	YIL090W
YIL088C	chrIX	197839	199483		33.0098	41.9848	13.5099	16.9162	14.7575	19.6931	20.4749	14.8343	16.9903	18.8957	YIL088C
YIL087C	chrIX	199567	200192		42.1755	50.3297	15.6265	17.6526	23.4658	30.3778	32.1542	20.236	22.9391	27.8989	YIL087C
YIL085C	chrIX	200437	202115		72.6074	74.9372	36.4557	39.8671	32.0617	33.3367	34.4245	36.2318	35.3442	37.3519	YIL085C
YIL084C	chrIX	202242	203300		104.92	104.174	52.3284	55.2263	54.6556	52.1955	51.9932	56.6136	56.8614	57.3628	YIL084C
YIL083C	chrIX	203458	204757		59.0499	57.003	27.0743	27.9272	26.2689	30.9729	28.1396	27.5868	30.0781	27.6331	YIL083C
YIL079C	chrIX	210822	212135		81.0989	77.3154	47.6987	49.3729	39.1471	36.1552	34.8877	43.273	38.4809	38.6779	YIL079C
YIL078W	chrIX	212433	214778		204.886	196.371	117.723	124.759	91.5442	87.406	90.4158	98.0023	96.7519	95.3127	YIL078W
YIL076W	chrIX	216616	217803		103.598	121.795	54.3486	64.4441	52.3066	54.9427	57.841	56.1724	54.4739	63.4562	YIL076W
YIL075C	chrIX	217765	220761		151.01	142.372	74.4666	71.0773	66.7514	89.1329	74.8748	70.4958	80.5027	65.8747	YIL075C
YIL074C	chrIX	221027	222623		66.7505	70.8108	27.2483	26.4046	28.5016	38.9737	32.3155	28.3166	30.0668	30.0575	YIL074C
YIL071C	chrIX	228431	230026		32.9041	33.7238	16.4174	16.9298	14.5949	15.1515	17.7324	15.9404	16.0477	18.2549	YIL071C
YIL070C	chrIX	230147	231149		71.1745	70.7802	39.392	38.4825	39.3427	32.0495	35.8623	39.0873	37.2013	38.4764	YIL070C
YIL069C	chrIX	231372	232413	2_RPG	504.958	187.763	305.72	110.614	271.407	83.4088	56.195	278.124	156.786	88.0806	YIL069C
YIL068C	chrIX	233023	235532		42.5213	38.273	20.0038	18.9176	18.8542	16.707	18.0645	19.544	18.3273	17.8446	YIL068C
YIL067C	chrIX	235640	237818		25.1875	27.1207	12.4211	13.572	11.7943	10.8604	12.2302	12.1274	12.2995	13.2545	YIL067C
YIL066C	chrIX	238015	240755		5.87345	7.24054	3.26966	3.9885	3.77056	11.462	8.16627	3.98848	4.97327	4.25155	YIL066C
YIL065C	chrIX	241232	241865	3_MSN2	31.6138	38.602	13.7553	15.2442	19.156	22.8025	20.4067	16.5145	16.3145	19.3823	YIL065C
YIL064W	chrIX	241942	242796		57.7255	50.3543	36.278	30.9574	31.0674	29.0505	21.8522	33.4895	29.5387	25.7802	YIL064W
YIL063C	chrIX	242724	243791		82.6397	100.482	49.7277	55.117	44.4709	41.0394	44.3739	42.6456	42.1253	46.6194	YIL063C
YIL062C	chrIX	243916	244499		124.979	152.698	55.7727	65.0848	64.4461	65.0218	73.5417	61.0767	63.9022	75.5366	YIL062C
YIL061C	chrIX	244446	245577		50.6182	57.0909	26.3606	30.1231	25.7987	24.3459	25.2408	25.3827	25.9306	27.2677	YIL061C
YIL060W	chrIX	246276	246540		8.66788	6.98973	3.35129	2.78962	2.61371	3.5483	3.72008	2.85102	3.41758	2.92773	YIL060W
YIL057C	chrIX	247900	248468		4.02262	4.04882	2.55607	2.08898	2.07523	1.98199	2.30875	2.67621	2.04748	2.58326	YIL057C
YIL056W	chrIX	249652	251971		94.2663	91.5091	44.1427	39.3105	39.6127	41.3898	36.0105	40.1857	39.6979	37.5314	YIL056W
YIL053W	chrIX	255081	256027		585.914	553.541	377.299	358.269	375.444	282.358	246.158	383.407	376.57	332.375	YIL053W
YIL052C	chrIX	256176	257093	2_RPG	657.34	253.794	381.198	143.885	332.047	106.943	76.7935	343.136	201.988	119.302	YIL052C
YIL051C	chrIX	257725	258368		244.331	222.69	115.402	92.1245	132.746	99.6947	94.1067	138.367	112.322	111.893	YIL051C
YIL050W	chrIX	258792	259789		81.2291	87.7903	35.7476	33.7628	33.6202	32.9081	34.7632	32.9471	32.1862	34.8174	YIL050W
YIL049W	chrIX	260151	260989		65.6036	66.5447	27.6819	28.0338	27.8867	24.5917	28.9525	31.0027	28.484	32.7681	YIL049W
YIL048W	chrIX	261131	265018		59.1758	57.5164	28.4228	28.0434	25.5621	33.0939	34.0627	27.8608	30.6052	28.6946	YIL048W
YIL047C	chrIX	265030	267860		112.691	100.058	55.3135	52.0243	51.3925	49.0933	48.7837	48.9654	44.6668	42.3159	YIL047C
YIL046W	chrIX	268650	270682		52.4781	55.6802	26.9411	29.9985	26.5115	31.3345	27.3427	24.4824	24.2255	25.4468	YIL046W
YIL045W	chrIX	270879	272781		21.8216	27.7269	12.2121	12.1961	11.2681	12.3624	14.9875	10.9771	11.2421	14.2459	YIL045W
YIL044C	chrIX	272834	273871		55.2508	56.8253	27.7187	28.1242	29.3194	29.1844	30.3505	28.1421	25.9406	29.8972	YIL044C
YIL043C	chrIX	273968	274969		78.3744	80.5439	33.0164	38.7552	41.5106	40.9122	40.0438	39.2823	42.9716	42.0678	YIL043C
YIL042C	chrIX	275057	276342		38.4186	42.1058	17.8535	18.7895	23.2829	28.8561	26.1325	22.1234	21.8222	23.2904	YIL042C
YIL041W	chrIX	276483	277592		79.2363	88.9089	38.8633	44.7651	46.3574	49.0965	47.8661	41.5377	45.6869	48.1546	YIL041W
YIL040W	chrIX	277687	278245		100.082	112.493	47.2101	55.739	55.5651	45.3758	50.0681	54.0817	56.2078	62.7147	YIL040W
YIL039W	chrIX	278373	279994		46.4714	47.5118	22.0923	24.4722	20.9845	21.0461	23.8951	22.5052	21.2191	24.0782	YIL039W
YIL038C	chrIX	279979	282894		80.7697	78.0087	44.2048	44.5099	34.5736	37.5423	40.5769	36.7694	38.3906	38.1577	YIL038C
YIL036W	chrIX	285482	287538		66.8277	70.8969	31.7136	29.4565	33.1744	45.3101	45.5521	32.3432	37.109	34.899	YIL036W
YIL035C	chrIX	287437	289060		106.753	93.0783	56.3543	54.5258	46.0216	48.5484	47.8625	49.6421	51.4604	47.3504	YIL035C
YIL034C	chrIX	289152	290141		105.833	118.247	42.602	46.3102	50.7503	54.9034	59.8248	49.6823	53.1979	56.1366	YIL034C
YIL033C	chrIX	290239	291776		61.1485	75.6215	28.8817	31.4361	35.9225	48.4659	47.0391	31.5289	36.2922	38.8069	YIL033C
YIL031W	chrIX	292462	296135		50.2929	52.1771	24.5958	27.3962	21.7067	29.4489	30.8377	23.4755	25.5985	26.4587	YIL031W
YIL030C	chrIX	295964	300057		76.6437	66.6817	39.2615	37.5398	34.9839	39.278	34.0998	38.2716	39.056	32.4958	YIL030C
YIL029C	chrIX	300450	301361		24.0525	32.1477	9.59596	14.5011	12.9325	14.1552	18.2439	13.0427	14.9144	16.7457	YIL029C
YIL027C	chrIX	303592	304182		103.136	101.539	48.8215	47.9269	52.4809	44.5319	47.4174	55.7781	58.5695	59.3239	YIL027C
YIL026C	chrIX	304335	307937		48.5126	52.6571	24.8326	26.6714	21.4679	23.41	25.6883	22.5598	21.0914	22.6552	YIL026C
YIL023C	chrIX	308581	310462		48.4322	57.0011	20.5579	26.3883	24.9511	27.5559	27.2345	22.5408	24.2384	26.0019	YIL023C
YIL022W	chrIX	311046	312685		109.985	113.232	59.396	63.3425	59.1374	54.041	53.4574	56.8172	54.8051	56.0589	YIL022W
YIL021W	chrIX	312792	313994		108.314	102.672	58.2186	57.366	53.9352	46.6858	45.851	54.7478	51.9207	51.9658	YIL021W
YIL020C	chrIX	313915	314908		49.8013	42.2231	31.6355	26.7582	28.8251	30.5047	26.0137	30.7604	26.424	24.173	YIL020C
YIL019W	chrIX	315057	316244		64.1836	47.5503	48.529	43.4065	31.6085	29.3891	23.9917	36.3699	29.541	25.7216	YIL019W
YIL018W	chrIX	316725	318021	2_RPG	742.668	286.653	468.355	176.884	432.458	122.305	81.6699	411.273	240.347	139.398	YIL018W
YIL017C	chrIX	317938	321041		38.8926	33.4765	17.2722	14.151	18.7072	24.6314	24.7321	20.2729	19.1453	18.5107	YIL017C
YIL016W	chrIX	321386	321992		65.7545	69.6149	34.6716	38.5037	121.059	89.6117	100.621	110.018	96.5075	113.424	YIL016W
YIL015W	chrIX	322267	324105		10.8113	13.3353	5.79882	6.82395	53.4693	31.3741	39.883	50.7409	34.2468	47.9018	YIL015W
YIL014C-A	chrIX	325114	325613		7.32126	9.58852	5.15078	4.54567	7.63804	7.24208	7.4889	7.57244	6.59449	9.25138	YIL014C-A
YIL014W	chrIX	325928	327998		47.0777	47.0952	22.4974	23.5785	21.8161	22.9996	23.7642	23.6433	25.0396	25.0809	YIL014W
YIL013C	chrIX	328099	332555		25.7595	28.3657	9.6988	11.0505	10.7204	18.5763	16.6971	10.7672	14.6522	13.0888	YIL013C
YIL011W	chrIX	333694	334609		9.34609	11.5107	4.07384	7.60795	4.74549	11.0749	8.69097	5.36047	6.85291	5.9572	YIL011W
YIL010W	chrIX	334831	335709		39.5747	47.7268	13.7276	20.7804	17.6377	22.0541	23.8472	17.5745	22.1143	24.9437	YIL010W
YIL009C-A	chrIX	335516	336269		43.9243	45.9966	21.1604	22.7125	23.2845	24.1364	23.1473	21.2244	23.7944	26.4424	YIL009C-A
YIL009W	chrIX	339329	341632		110.358	115.738	66.2694	68.9342	53.9281	53.8701	50.1111	62.4037	51.4848	50.3251	YIL009W
YIL008W	chrIX	342443	342961		66.3984	67.3405	33.8785	38.6606	33.939	30.6749	29.7684	34.9237	37.4339	35.3868	YIL008W
YIL007C	chrIX	342832	343681		50.9915	68.5328	23.0052	32.036	25.202	31.8502	34.4147	25.6795	29.0919	36.9937	YIL007C
YIL006W	chrIX	344045	345352		39.8926	44.4112	16.1438	17.7377	19.9284	26.6828	25.0734	18.3567	21.9584	21.9328	YIL006W
YIL005W	chrIX	345558	347986		44.5449	48.9317	20.5315	23.3944	20.0352	26.2263	27.0796	21.0282	23.0495	24.6665	YIL005W
YIL004C	chrIX	347883	348533		73.0526	74.6492	35.0071	38.4237	40.4454	42.1807	42.088	37.4979	40.6369	43.1703	YIL004C
YIL003W	chrIX	349069	350090		43.2487	43.5287	21.2644	22.521	22.975	28.7876	24.3029	24.0863	24.7249	21.8959	YIL003W
YIL002W-A	chrIX	350272	350582		104.04	104.218	46.8359	49.234	51.2042	40.6741	40.4523	51.7683	52.2474	54.2123	YIL002W-A
YIL002C	chrIX	350438	353596		37.6199	41.4786	17.9937	19.2168	17.4239	21.9607	22.8402	18.0901	19.5511	20.8117	YIL002C
YIL001W	chrIX	353880	355576		46.0639	47.8762	23.1176	24.2936	21.9671	27.5952	29.4804	22.7509	23.9784	25.3701	YIL001W
YIR001C	chrIX	355989	356979		55.8621	67.7147	29.7802	34.7144	28.7567	29.1307	35.5792	27.8797	31.1882	35.4417	YIR001C
YIR002C	chrIX	357327	360486		44.6581	49.1663	23.6614	27.9682	20.4339	27.4793	29.8715	22.102	22.9989	23.9175	YIR002C
YIR003W	chrIX	360836	362996		55.0836	66.7762	26.4119	30.7095	26.7662	31.7804	34.3477	26.3322	29.445	32.4654	YIR003W
YIR004W	chrIX	363167	364629		80.0584	86.4639	43.6724	46.4908	38.657	41.3056	44.9989	37.3629	42.1362	43.6967	YIR004W
YIR005W	chrIX	364887	365402		41.3796	49.9688	19.2531	23.3709	21.3094	24.4753	26.4292	24.3635	26.0695	27.9451	YIR005W
YIR006C	chrIX	365402	369968		71.8005	79.323	34.5117	37.903	34.6078	40.9346	45.1159	34.62	36.6104	37.3557	YIR006C
YIR007W	chrIX	370608	373110		20.8155	23.508	8.20251	8.97845	8.0543	13.9399	14.4142	8.71516	9.7308	11.3214	YIR007W
YIR008C	chrIX	373006	374364		55.0256	59.7107	26.5853	30.1208	24.0822	26.5581	28.9842	24.3334	26.5997	27.38	YIR008C
YIR009W	chrIX	374446	375305		56.902	63.8701	26.7168	28.7537	30.4199	32.2051	32.4999	29.4123	31.3456	31.6954	YIR009W
YIR010W	chrIX	375336	377289		62.4223	74.3053	35.1891	41.8971	30.6181	34.6129	39.0015	32.799	30.8704	35.0633	YIR010W
YIR011C	chrIX	377211	378279		85.4767	92.2588	49.3316	58.6621	44.4451	54.1836	55.5833	48.2356	51.3966	51.2737	YIR011C
YIR012W	chrIX	378445	379906	1_RiBi	111.001	114.354	68.7929	80.8666	58.591	63.7857	62.5959	61.3103	61.125	64.1827	YIR012W
YIR013C	chrIX	379929	380462		6.93214	9.42313	3.69099	4.19715	5.84889	13.0626	8.17173	5.52961	5.10747	5.02677	YIR013C
YIR014W	chrIX	381061	381833		95.0326	99.4451	44.7764	45.6262	55.6487	69.5489	65.0355	54.2823	54.3645	55.4339	YIR014W
YIR016W	chrIX	382586	383475		50.8428	59.9718	26.4445	32.1568	26.5632	38.0087	38.5745	23.544	25.6697	29.9703	YIR016W
YIR017C	chrIX	383397	384119		36.8611	44.1019	11.4301	14.7494	17.1135	21.4378	22.7919	15.6555	14.8209	18.9331	YIR017C
YIR018W	chrIX	384608	385822		73.106	76.8109	29.1973	31.467	26.2728	39.1611	35.6435	27.2621	29.2477	28.6994	YIR018W
YIR019C	chrIX	389475	393745		11.5296	12.8241	5.43822	5.50409	5.63415	10.6769	11.3187	5.47688	6.82069	6.48357	YIR019C
YIR021W	chrIX	397241	398419		61.2726	65.7338	28.5178	32.3446	30.4354	32.7849	34.0011	28.9582	29.236	33.7699	YIR021W
YIR021W-A	chrIX	398513	399338		60.4578	64.2247	32.1232	34.1017	32.4304	33.2134	34.7239	32.688	32.5099	34.9639	YIR021W-A
YIR022W	chrIX	398674	399338		64.8361	69.9765	35.2309	37.5866	34.7035	35.3829	37.3117	34.4362	35.1081	37.4674	YIR022W
YIR023W	chrIX	399747	402799		52.0775	56.7646	25.4028	28.5248	23.6838	32.2512	30.9994	23.8759	24.6859	25.5237	YIR023W
YIR024C	chrIX	402763	403534		49.1316	49.4168	23.8389	25.716	22.6302	28.7829	26.8605	23.5776	25.8825	26.3944	YIR024C
YIR025W	chrIX	403641	404796		38.1664	40.322	22.2377	22.7066	19.2608	25.6807	22.1665	20.1451	19.6031	19.9002	YIR025W
YIR026C	chrIX	404779	406006		60.9718	62.1134	41.7687	46.0015	30.1699	39.7739	34.1498	32.0106	32.6401	32.6178	YIR026C
YIR030C	chrIX	411983	412809		21.1222	24.7128	9.11061	12.2007	10.4699	13.094	12.5664	10.2372	11.1091	13.4954	YIR030C
YIR031C	chrIX	412960	414802		84.8933	96.2463	35.6341	40.168	37.0722	47.1861	42.1623	35.7052	37.2061	39.6219	YIR031C
YIR032C	chrIX	414905	415678		115.332	125.324	36.7717	45.7769	60.3276	64.448	56.5088	54.4414	50.7952	57.0425	YIR032C
YIR033W	chrIX	416070	419567		67.8839	85.2872	31.6929	41.8388	33.8615	45.4676	46.2256	37.4715	34.6248	41.4177	YIR033W
YIR034C	chrIX	419542	420785		45.8189	52.3689	23.263	23.0635	26.1815	36.3548	27.9827	26.0826	27.7296	24.5012	YIR034C
YIR035C	chrIX	420961	421858		48.4474	59.4468	25.6518	36.7892	27.3045	37.0938	35.0558	28.0823	28.4552	33.9265	YIR035C
YIR036C	chrIX	422005	422921		23.994	29.0285	10.9316	12.7303	17.0659	25.7172	19.8307	14.3752	15.4128	16.7967	YIR036C
YIR037W	chrIX	423024	423768		35.2288	43.6608	14.1206	16.4114	17.5113	30.4686	30.8682	17.2933	23.8027	21.7767	YIR037W
YIR038C	chrIX	423690	424542		21.5677	28.7146	8.35264	10.6844	11.5269	18.7635	18.5196	11.1598	13.2288	16.2409	YIR038C
YIR039C	chrIX	430321	432256		10.9976	16.5638	4.61927	6.7427	5.32342	9.49183	12.5057	4.91035	5.6355	8.59854	YIR039C
YIR041W	chrIX	433720	434324		0.883659	1.26517	0.679702	1.06068	1.04262	2.39051	1.88313	0.980828	1.12752	1.23123	YIR041W
YIR042C	chrIX	434895	436051		10.0393	11.6967	10.4419	13.9601	9.2223	13.586	13.9025	8.01822	8.11895	11.2807	YIR042C
YEL072W	chrV	13585	14644		56.9595	62.0773	24.2897	25.0515	23.4711	27.743	28.6594	24.451	26.4273	28.4349	YEL072W
YEL071W	chrV	16287	17963		176.731	235.267	77.6198	103.645	87.8114	84.3266	112.56	85.2373	80.994	103.619	YEL071W
YEL070W	chrV	19588	21233		1.59872	1.94845	0.752419	0.738079	1.03969	1.99735	1.35742	0.845277	1.02157	1.0371	YEL070W
YEL069C	chrV	21428	23231		11.6134	14.2659	6.03805	6.61841	5.73524	9.71583	9.99837	5.8067	7.10268	7.79768	YEL069C
YEL067C	chrV	25993	26970		31.4133	35.1433	15.4279	17.7226	22.0357	23.4628	21.2533	19.4607	20.1815	20.8584	YEL067C
YEL065W	chrV	27614	29619		61.0442	77.6975	45.0179	53.6466	32.8779	32.439	36.4116	48.5214	47.508	46.3436	YEL065W
YEL064C	chrV	29692	31283		34.5921	38.7102	16.9009	18.5279	15.3267	17.479	17.0436	16.147	15.5075	18.1763	YEL064C
YEL063C	chrV	31424	33721		128.412	136.786	56.928	65.2739	49.046	58.0746	61.2482	52.391	52.6782	53.761	YEL063C
YEL061C	chrV	36273	39632		56.9977	58.9696	28.5016	30.5725	24.8284	28.9693	31.1722	26.9825	25.9777	26.8578	YEL061C
YEL060C	chrV	39810	42015		81.7465	110.781	35.6418	44.8596	44.352	55.4274	58.9971	39.4822	44.986	52.0269	YEL060C
YEL059C-A	chrV	42343	42748		33.8704	46.1055	14.9336	26.5014	18.7845	22.3038	26.0117	16.7415	16.4085	24.4993	YEL059C-A
YEL058W	chrV	43207	45001		74.6789	91.6395	34.6809	43.614	37.6207	39.686	41.6693	34.8883	33.5584	39.025	YEL058W
YEL056W	chrV	47089	48404		64.0388	60.0211	31.7785	28.9315	33.7534	38.9671	33.7493	32.6463	34.5323	32.6353	YEL056W
YEL055C	chrV	48397	51633		93.9943	89.6775	52.9935	53.7335	40.8186	48.5024	46.1669	45.8799	46.8807	43.5575	YEL055C
YEL054C	chrV	52480	53343	2_RPG	674.492	258.599	376.213	158.925	392.378	127.825	87.3208	377.342	231.176	138.587	YEL054C
YEL053C	chrV	53816	56169		39.1047	28.9379	19.6599	14.7623	18.8052	18.1427	16.0007	20.4672	16.8422	14.3611	YEL053C
YEL052W	chrV	56535	58171		32.7482	32.6203	15.0263	14.0989	16.155	21.9432	20.3902	15.923	16.7864	17.0878	YEL052W
YEL051W	chrV	58306	59257		141.072	137.348	64.4772	60.4568	68.4887	70.1398	69.5147	70.4728	75.948	73.1413	YEL051W
YEL050C	chrV	59514	60945		66.5497	71.7151	32.1209	34.8019	42.9194	44.6636	39.8453	42.3157	35.4451	41.364	YEL050C
YEL049W	chrV	63712	64112		9.1575	8.94603	5.26805	5.09872	4.21988	8.01248	6.17502	4.0163	5.14473	3.85533	YEL049W
YEL048C	chrV	64192	65193		71.2221	62.5473	38.5095	36.547	30.8031	27.967	26.2499	31.8268	35.5075	30.4595	YEL048C
YEL047C	chrV	65308	66818		48.5078	60.0991	21.7574	24.6955	23.6039	28.6484	26.3589	22.9298	23.5973	28.0737	YEL047C
YEL046C	chrV	67046	68909		521.769	495.321	269.739	255.092	292.635	214.73	186.105	285.057	250.766	229.863	YEL046C
YEL044W	chrV	69727	70309		118.002	107.572	51.8069	46.3663	71.334	69.1303	49.3794	63.5754	62.7074	51.7332	YEL044W
YEL043W	chrV	70432	73462		65.826	66.1864	31.0776	31.5283	29.0074	32.7667	31.906	30.9027	31.5458	31.1006	YEL043W
YEL042W	chrV	73557	75475		84.6906	84.0323	47.1961	46.9917	40.1989	35.169	35.3171	43.4619	40.6745	40.5463	YEL042W
YEL040W	chrV	78013	79500		469.834	520.606	262.877	287.937	263.144	216.242	223.178	269.242	247.018	258.86	YEL040W
YEL039C	chrV	79529	80065		46.6608	62.3178	22.5675	24.2519	36.8058	69.6438	67.7492	30.8358	40.3525	42.7905	YEL039C
YEL038W	chrV	80410	81200	3_MSN2	29.8581	39.2749	16.2182	19.5095	21.0256	36.3722	30.2808	20.7014	26.5258	23.5102	YEL038W
YEL037C	chrV	81243	82805		114.235	114.179	61.7453	62.11	59.2548	70.1724	55.9129	56.8893	64.0288	55.7507	YEL037C
YEL036C	chrV	82966	84696		113.554	123.922	52.991	63.2572	57.0032	60.2968	57.5178	55.1968	55.506	58.7414	YEL036C
YEL034W	chrV	85582	86368		1603.15	1711.13	842.896	846.253	891.787	533.789	781.62	674.669	874.139	844.004	YEL034W
YEL032W	chrV	86885	89999		76.5505	82.6852	38.9181	45.4416	38.18	36.6136	38.0581	38.0436	34.9554	42.0966	YEL032W
YEL031W	chrV	90221	93991		104.581	100.022	49.5422	49.2767	47.6482	57.8441	53.293	49.5743	53.8116	47.8528	YEL031W
YEL030W	chrV	94221	96742		33.2547	38.5227	14.8325	17.9607	18.2899	20.2503	20.3884	17.8881	18.8008	21.2123	YEL030W
YEL029C	chrV	96750	97860		54.1753	56.4853	30.5183	33.3664	27.094	31.709	29.926	30.4279	29.5735	32.5582	YEL029C
YEL027W	chrV	100698	101528		275.733	297.29	122.292	132.534	142.521	138.863	142.341	142.345	139.037	153.737	YEL027W
YEL026W	chrV	101752	102395	1_RiBi	535.494	530.755	349.067	374.009	310.946	227.07	254.773	331.598	317.225	348.495	YEL026W
YEL025C	chrV	102375	106186		54.5338	57.6872	25.4074	26.1217	26.0042	31.9039	31.7926	28.176	29.6761	30.9448	YEL025C
YEL024W	chrV	107145	108314		159.777	176.022	89.2275	100.358	132.171	112.541	128.993	117.663	121.931	135.624	YEL024W
YEL023C	chrV	108439	110552		21.8387	24.309	11.0945	12.9336	9.30992	12.6823	13.8078	10.3757	11.122	12.0698	YEL023C
YEL022W	chrV	111353	115877		57.5822	54.6565	27.2537	28.3484	24.2565	28.0507	28.464	27.1272	28.7023	26.9079	YEL022W
YEL021W	chrV	116107	117031		96.5859	102.724	55.8016	59.4439	287.393	173.901	216.594	284.377	273.071	281.483	YEL021W
YEL020W-A	chrV	117134	117591		314.633	321.298	134.112	135.275	174.558	114.864	123.95	170.795	145.218	164.342	YEL020W-A
YEL020C	chrV	118514	120366		19.67	20.7619	9.29117	11.0698	9.67837	12.3002	12.9189	9.41489	8.94239	10.0657	YEL020C
YEL019C	chrV	120346	121310		26.1941	28.8984	14.0833	16.3053	13.5354	14.2048	13.7806	13.9486	12.4409	14.615	YEL019C
YEL018W	chrV	121436	122378		88.2398	96.0391	49.0785	51.5015	50.1813	45.2807	43.6506	47.1248	46.9517	46.3006	YEL018W
YEL017C-A	chrV	122380	123038		474.287	450.76	242.933	243.365	260.432	163.809	169.208	263.599	239.427	258.134	YEL017C-A
YEL017W	chrV	123615	124765		48.2832	57.9059	21.4429	23.7756	25.563	33.2106	32.2547	24.2179	26.0153	27.1031	YEL017W
YEL016C	chrV	124521	126424		38.4661	40.5518	16.538	17.9596	18.4984	22.3335	21.629	19.267	18.4693	20.453	YEL016C
YEL015W	chrV	126589	128340		95.9077	94.9324	53.4508	53.5448	44.4044	47.7304	47.7611	45.7483	48.8358	48.6149	YEL015W
YEL013W	chrV	128550	130745		62.4378	62.2363	27.2694	27.4986	26.0987	34.2282	34.5462	27.3532	28.2629	29.8046	YEL013W
YEL012W	chrV	131620	132641		18.3579	22.0052	7.47495	8.59619	8.96786	15.9735	16.7488	8.66366	10.7627	13.4483	YEL012W
YEL011W	chrV	133088	135348		38.5435	52.1408	14.7756	16.0149	21.2671	37.2088	43.0458	18.6815	23.1758	28.6793	YEL011W
YEL009C	chrV	138821	139851		734.36	714.148	389.52	389.675	357.98	250.78	248.032	372.254	312.365	335.476	YEL009C
YEL007W	chrV	141630	143924		155.075	165.471	73.0305	76.2891	76.105	65.2995	66.2474	75.188	63.8066	72.3742	YEL007W
YEL006W	chrV	144252	145927		66.2899	63.2345	31.1128	29.8165	34.3719	32.4563	29.8757	33.6403	35.2844	33.4624	YEL006W
YEL005C	chrV	145823	146794		31.8018	34.814	13.8235	15.5042	16.0688	23.322	23.3327	17.1502	18.1473	19.5102	YEL005C
YEL004W	chrV	146893	148067		44.0175	48.7525	21.5234	23.1847	24.9049	28.4364	27.6362	26.3827	27.6079	28.2364	YEL004W
YEL003W	chrV	148156	148724		85.423	84.5876	43.2777	44.7362	43.978	48.5934	46.2001	47.1708	47.9991	44.6051	YEL003W
YEL002C	chrV	148698	150089		83.7929	86.6718	39.2337	42.9652	40.3874	58.9873	50.2421	40.0927	47.8084	46.5918	YEL002C
YEL001C	chrV	150205	151016		79.7681	82.5689	36.2656	39.102	39.0542	45.5001	42.3769	38.8577	41.5106	39.5579	YEL001C
YER001W	chrV	153403	155913		124.951	150.436	59.6044	71.9046	76.2311	57.9313	59.7396	79.8085	69.0967	74.6436	YER001W
YER002W	chrV	156738	157588	1_RiBi	173.626	180.943	131.533	136.302	82.823	73.1745	75.8576	90.0153	83.1713	89.0277	YER002W
YER003C	chrV	157655	159161		71.8132	82.0983	40.6415	42.743	39.1553	39.0164	42.521	39.2026	41.1045	43.3567	YER003C
YER004W	chrV	159569	160516		81.9378	85.8947	42.2194	42.335	53.4862	56.796	48.9896	50.254	51.5638	48.9489	YER004W
YER006W	chrV	162683	164348	1_RiBi	161.522	156.956	110.268	124.919	74.597	77.5134	76.2988	82.3665	80.2417	82.2502	YER006W
YER007W	chrV	164505	166215		36.6182	35.8067	18.7076	22.4884	16.001	21.3778	18.6423	17.1557	18.7017	18.072	YER007W
YER007C-A	chrV	166047	166934		113.946	129.042	66.8296	76.7775	60.8645	58.7898	61.8517	65.388	66.4841	72.3789	YER007C-A
YER008C	chrV	167739	171887		63.4858	66.3538	32.9562	34.9495	30.6486	37.2637	36.8749	33.4058	33.2943	34.3546	YER008C
YER009W	chrV	172026	172667		167.411	183.872	89.2076	99.1655	88.9659	82.5387	87.9403	86.8655	100.589	103.706	YER009W
YER010C	chrV	172531	173366		38.4298	42.3597	20.9854	26.3958	21.3827	25.9676	25.2985	20.1679	23.1792	25.753	YER010C
YER011W	chrV	175193	176168		7.67169	12.2125	4.90686	6.79885	3.80896	6.6167	5.66017	3.46352	4.76608	4.59143	YER011W
YER012W	chrV	177748	178571		194.726	182.492	87.1775	76.469	97.9111	128.187	99.0731	98.1295	120.747	87.6441	YER012W
YER013W	chrV	178788	182346		39.8092	44.7462	22.7876	25.1437	18.7007	25.5549	23.155	20.7121	20.8124	20.7104	YER013W
YER014W	chrV	182545	184332		16.4488	21.5387	7.8697	9.55889	8.038	13.6256	12.8517	7.65396	8.90328	9.70172	YER014W
YER015W	chrV	184465	187028		26.9577	29.3766	10.3926	11.7191	11.9151	15.691	15.5007	12.2337	13.782	14.644	YER015W
YER016W	chrV	188187	189431		66.9377	67.6489	35.0243	36.4438	31.4664	33.9866	33.4224	31.8708	31.8022	31.482	YER016W
YER017C	chrV	189430	191909		50.7772	51.4673	22.3548	23.0383	23.6273	38.3658	36.1715	22.5954	28.2916	24.3336	YER017C
YER018C	chrV	191890	192711		70.5445	86.4141	26.9359	33.2442	47.9039	45.0006	36.7527	40.3507	34.0141	38.5563	YER018C
YER019W	chrV	192796	194313		87.8177	91.4119	35.3325	39.0599	43.4919	50.6135	42.909	40.9932	39.5282	40.2162	YER019W
YER019C-A	chrV	194228	194627		213.987	218.517	94.0305	95.274	124.164	98.6248	112.783	111.889	110.625	114.317	YER019C-A
YER020W	chrV	195074	196693		53.2695	63.1535	22.3763	25.3065	28.6016	35.6516	35.6755	24.7322	26.9835	30.6787	YER020W
YER021W	chrV	196878	198650		164.213	148.943	81.4149	72.2487	73.4475	91.1167	81.4007	77.6079	89.4165	69.5416	YER021W
YER022W	chrV	198775	200976		48.4497	51.1615	24.0597	25.6726	21.3195	23.3314	26.0627	24.0958	25.3047	25.7713	YER022W
YER023W	chrV	201022	202006		81.1182	88.6288	36.2401	38.1185	41.7503	45.0418	45.2278	37.9403	40.4651	42.6445	YER023W
YER024W	chrV	202177	205080		46.0194	50.0172	20.2521	23.8982	22.6134	31.8675	29.2436	22.7866	24.035	26.0691	YER024W
YER025W	chrV	205185	207096	1_RiBi	191.478	205.709	115.172	125.568	94.8247	101.017	107.519	100.753	102.653	102.808	YER025W
YER026C	chrV	207517	208564		95.0839	98.1668	43.4115	47.4555	49.8367	53.0441	57.771	47.7834	55.267	54.2746	YER026C
YER027C	chrV	208747	210354		39.4176	43.2344	17.7604	19.2235	21.9498	28.3895	25.2067	20.1363	21.8466	23.1255	YER027C
YER028C	chrV	210646	211987		56.0508	49.2781	25.259	23.9254	23.0871	25.2654	16.398	23.9203	23.6623	17.2752	YER028C
YER029C	chrV	212474	213247		88.6005	98.0126	50.8672	57.8197	38.9893	49.5415	50.4323	41.5087	43.278	47.0567	YER029C
YER030W	chrV	213348	214024		80.4582	89.5859	43.5961	43.2342	41.9219	48.7467	46.9552	41.1487	48.9145	46.9383	YER030W
YER031C	chrV	213930	214788		85.3293	90.9065	50.3372	51.8417	48.8873	55.6378	56.3738	46.2524	51.1197	51.7694	YER031C
YER032W	chrV	214969	217957		56.0779	61.1591	27.0069	30.8486	24.8626	38.3852	41.8752	26.0512	30.2657	30.4674	YER032W
YER033C	chrV	217885	221511		23.233	30.9949	10.9445	13.5858	11.1889	22.5778	20.3767	11.2146	13.6931	14.9309	YER033C
YER035W	chrV	222565	223206		129.524	152.338	49.4787	59.9424	71.0095	167.024	113.878	62.4407	86.9111	81.4469	YER035W
YER036C	chrV	223259	225237		255.269	243.387	145.88	148.95	123.131	157.129	133.993	133.327	134.9	134.299	YER036C
YER037W	chrV	225777	227075		61.4779	107.262	16.5582	30.2522	22.3876	49.1765	58.9989	22.3676	30.7374	45.0873	YER037W
YER040W	chrV	229707	232243		50.5009	49.7185	24.3938	24.4491	22.0644	32.9132	29.2555	23.0519	24.7632	22.1408	YER040W
YER041W	chrV	232378	234904		32.5162	34.6273	15.2442	15.2012	15.8542	19.9953	19.6418	16.5136	17.9495	17.9345	YER041W
YER042W	chrV	234844	235655		59.1132	47.922	22.9382	18.9129	23.621	32.909	21.2427	24.9866	25.813	19.7271	YER042W
YER043C	chrV	235550	237202		344.931	376.124	191.442	220.246	188.707	185.665	187.344	186.908	182.494	206.465	YER043C
YER044C	chrV	237448	238155		145.412	169.259	58.8035	69.092	67.345	105.011	100.135	72.0574	75.6125	97.7577	YER044C
YER045C	chrV	239854	241576		44.5076	68.8287	17.6393	29.6187	11.3804	25.196	29.7946	11.9002	14.2308	22.2756	YER045C
YER047C	chrV	243776	246690		45.0156	47.5808	23.4545	25.2194	19.7596	32.8258	29.1822	20.4598	22.0613	21.8186	YER047C
YER048C	chrV	246859	248258		66.2063	69.1762	35.0716	39.4511	30.5043	43.5795	43.3957	31.1484	35.3388	36.281	YER048C
YER048W-A	chrV	250621	251334		122.103	133.731	58.7931	67.1265	64.6627	81.0993	82.6089	71.7472	76.5135	84.6856	YER048W-A
YER049W	chrV	251709	253742		111.316	116.538	67.2608	75.7899	51.8129	63.8007	56.4039	57.1024	57.3478	60.0725	YER049W
YER050C	chrV	253862	254453		86.6995	97.9408	46.6849	49.4484	50.14	54.0025	59.5336	48.8746	51.0762	56.1593	YER050C
YER051W	chrV	254639	256290		34.4092	36.9374	16.2841	17.9877	14.1671	20.8289	20.9874	17.3355	18.3825	18.7772	YER051W
YER052C	chrV	256262	258121		90.9722	77.8016	46.5383	41.5886	44.7832	67.5046	43.9603	44.0403	47.5077	35.3899	YER052C
YER053C	chrV	258592	259736		42.6005	64.4583	16.4194	18.5741	27.2328	78.4532	97.2771	22.7162	32.6532	46.0365	YER053C
YER053C-A	chrV	260715	261103		365.54	436.265	224.166	221.502	435.427	392.66	489.632	407.267	373.504	458.479	YER053C-A
YER054C	chrV	261955	264140		45.801	53.318	21.647	22.016	27.7976	36.3583	34.6444	27.0968	28.5519	32.9103	YER054C
YER055C	chrV	264758	265917		128.943	146.146	58.7524	60.0222	56.1194	55.3637	51.4681	57.9664	56.6512	56.07	YER055C
YER056C	chrV	266397	268203	1_RiBi	261.094	268.96	153.506	169.088	137.364	118.01	118.471	144.945	139.148	136.445	YER056C
YER056C-A	chrV	269342	270216	2_RPG	567.267	219.804	333.97	129.684	302.469	94.9356	66.7794	311.771	181.047	104.47	YER056C-A
YER057C	chrV	270646	271205		112.359	55.6561	41.9341	18.5188	56.2906	28.3116	22.4214	55.8779	33.5849	25.87	YER057C
YER058W	chrV	271705	272237		43.6591	40.7959	18.088	17.8459	23.898	23.7224	23.75	21.8506	23.8021	24.9065	YER058W
YER059W	chrV	272441	273977		46.7188	44.5466	21.5475	19.6189	22.2394	26.1671	25.8929	22.2003	23.9777	22.5469	YER059W
YER060W	chrV	274421	276310	1_RiBi	49.6238	53.9851	20.2066	23.0411	21.6624	29.8438	30.5089	21.9976	26.2625	25.58	YER060W
YER061C	chrV	278244	279665		36.1997	40.9989	15.0396	19.4314	14.3496	18.8294	20.1326	14.217	18.1132	17.7957	YER061C
YER062C	chrV	279755	280747		29.5808	46.6951	16.4248	24.891	24.4879	36.3202	41.5542	22.1563	29.3223	39.8009	YER062C
YER063W	chrV	281616	282514		117.432	139.258	44.9033	48.9308	62.1851	88.6348	88.5565	58.3243	65.3285	66.7862	YER063W
YER064C	chrV	282446	284362		252.459	264.678	140.929	144.108	139.502	109.454	123.177	143.653	137.567	136.575	YER064C
YER065C	chrV	285123	287181		89.8866	90.3728	41.1828	40.2296	47.2291	57.2667	48.6615	46.9529	52.6851	44.7932	YER065C
YER067W	chrV	291837	292643		63.6437	81.1853	19.8874	20.5637	46.7831	78.9557	107.178	38.241	47.7302	67.7732	YER067W
YER068W	chrV	292929	294929		94.7172	99.4888	48.6999	50.9769	41.5863	46.5592	47.5789	44.0309	43.5748	45.6067	YER068W
YER069W	chrV	295336	298121		46.6256	50.9206	25.2994	23.2267	29.5079	28.4984	22.8156	31.4814	28.0772	21.8752	YER069W
YER070W	chrV	298871	301821		259.884	291.592	172.717	176.401	191.205	206.531	218.29	190.921	185.134	182.292	YER070W
YER071C	chrV	301722	302378		113.942	118.085	41.4777	42.9269	50.2634	56.5058	57.1384	57.1352	53.5235	62.4439	YER071C
YER072W	chrV	302697	303339		391.59	468.842	110.281	128.274	152.402	147.452	165.019	150.354	135.867	172.183	YER072W
YER073W	chrV	303579	305867		287.909	268.853	117.874	107.362	124.574	90.2873	75.595	126.731	104.242	97.1249	YER073W
YER074W	chrV	306296	307294	2_RPG	623.177	225.805	386.025	138.586	323.425	100.583	67.5559	326.68	187.89	104.801	YER074W
YER074W-A	chrV	307583	308214		81.7068	82.4506	41.7233	44.0372	44.57	42.927	49.466	46.6627	47.4721	51.5582	YER074W-A
YER075C	chrV	308348	311365		58.6151	55.1663	30.701	30.3584	28.7838	42.4335	34.9518	31.4649	32.8833	28.7838	YER075C
YER076C	chrV	312297	313637		22.1836	24.0516	9.19257	9.42871	10.0799	13.169	12.8056	9.73051	9.86757	10.777	YER076C
YER077C	chrV	314548	316600		50.0123	60.5175	24.814	32.2404	21.6691	24.6243	27.9274	24.0441	25.0891	27.7765	YER077C
YER078C	chrV	316701	318575		59.0333	60.5968	22.8416	24.3811	23.1026	32.3674	31.3789	23.1027	26.45	27.6974	YER078C
YER079W	chrV	318840	319851		24.5807	29.4672	8.97892	10.3155	11.0509	16.674	20.2957	10.1695	12.5303	16.2194	YER079W
YER080W	chrV	319917	321928		51.2349	54.0273	24.6228	23.8597	25.2961	32.1166	29.3239	27.7029	26.1468	27.7772	YER080W
YER082C	chrV	324179	325998	1_RiBi	95.6068	98.7192	61.7753	70.4367	40.3708	55.1337	52.5636	44.3053	48.9127	49.8917	YER082C
YER083C	chrV	326129	327075		73.7416	79.2769	34.666	38.6254	39.8274	43.5402	45.0353	38.2745	39.7014	42.6326	YER083C
YER086W	chrV	328367	330348		78.5746	82.7266	40.0861	41.943	36.4904	43.2552	40.9969	39.5947	42.3537	42.9094	YER086W
YER087W	chrV	330529	332376		33.8771	37.4858	14.4722	16.1832	15.6362	20.9706	20.8343	16.5423	17.4045	19.6587	YER087W
YER087C-B	chrV	332372	332876		139.094	161.854	64.2567	71.7523	76.6134	65.1302	76.7452	75.8854	77.9379	83.2888	YER087C-B
YER088C	chrV	333040	335355		79.7092	72.1602	35.3236	30.4222	40.7322	45.6139	42.3281	36.5277	35.2848	33.635	YER088C
YER089C	chrV	335871	337691		82.3139	83.2495	34.4796	33.9961	37.6863	44.7521	44.2293	34.6512	34.6139	34.9569	YER089C
YER090W	chrV	337855	339560		65.0772	65.9144	32.8749	35.0975	30.1574	35.4225	31.2442	30.5089	31.5974	29.4232	YER090W
YER091C	chrV	339637	342236		261.565	238.694	88.2533	74.3142	85.3179	56.3402	55.084	79.4619	59.0428	65.8132	YER091C
YER092W	chrV	342815	343431		97.9223	109.057	45.1801	49.8853	57.0606	66.4888	68.6698	54.5024	61.4084	64.9654	YER092W
YER093C	chrV	343260	347667		33.9984	35.3892	16.3342	16.9293	14.2868	28.003	22.9003	15.872	17.3038	16.7545	YER093C
YER093C-A	chrV	347787	348441		50.9822	58.1148	24.886	25.1644	30.5698	37.237	32.482	28.9287	31.9127	31.6635	YER093C-A
YER094C	chrV	348573	349455		127.776	121.817	55.5772	49.0782	66.7455	89.3351	74.5779	62.4768	73.1844	59.0646	YER094C
YER095W	chrV	349912	351380		102.849	128.896	50.2601	61.443	52.9031	64.0353	69.5389	47.7058	49.3292	59.7964	YER095W
YER096W	chrV	351613	353452		7.05805	7.90674	2.66686	3.96692	3.41794	12.9633	8.24672	3.34656	3.39436	3.93	YER096W
YER098W	chrV	355283	358056		21.0362	23.981	9.99661	9.85039	9.93898	19.6207	17.5208	9.61962	12.0466	12.1931	YER098W
YER099C	chrV	358030	359105		66.6393	77.1745	33.5272	41.7256	31.6286	39.2239	42.0722	32.0509	33.6282	37.9065	YER099C
YER100W	chrV	359275	360408		71.7022	71.1538	37.617	36.7602	35.4455	38.545	38.5544	37.67	37.9627	35.0796	YER100W
YER101C	chrV	360285	361827		26.6638	23.4275	12.4962	11.0627	12.7535	16.1889	16.6258	14.1011	12.7571	12.5575	YER101C
YER102W	chrV	362732	363767	2_RPG	744.244	272.675	457.119	171.943	389.756	133.573	85.212	380.672	230.78	126.904	YER102W
YER103W	chrV	364534	366646		30.9739	30.6237	19.112	18.6203	16.4982	153.827	43.9414	16.0561	24.4722	17.5832	YER103W
YER104W	chrV	366767	367810		48.318	50.1722	22.8758	23.8487	24.8702	34.0336	26.5352	24.45	24.2346	25.0324	YER104W
YER105C	chrV	367712	372033		60.0073	59.593	28.448	30.8701	24.7513	33.3063	32.9597	26.7342	30.1743	28.1662	YER105C
YER107C	chrV	373339	374720		60.1024	61.1883	31.736	31.3832	27.7205	33.4013	30.8578	27.8832	29.7835	28.2241	YER107C
YER109C	chrV	375027	377804		39.276	39.3381	18.9606	18.9573	18.319	20.4919	18.8935	18.7645	19.2994	17.8842	YER109C
YER110C	chrV	378608	382243		109.096	89.1187	64.0021	58.1722	46.374	60.024	45.1883	51.2801	52.9465	41.0923	YER110C
YER111C	chrV	382508	386194		51.9744	60.3595	26.0079	28.3105	21.789	25.6759	28.4339	23.2503	23.9855	26.2628	YER111C
YER112W	chrV	387130	387895		75.9059	74.2631	41.6057	41.2968	35.847	38.1351	39.8173	37.8061	39.8266	38.1312	YER112W
YER113C	chrV	387857	390209		55.7019	56.0019	27.232	25.8946	25.4607	30.6516	31.5018	26.3496	27.1812	27.0755	YER113C
YER114C	chrV	390350	394016		49.856	47.6135	25.9794	24.833	21.3575	27.0716	24.9831	22.73	22.6359	21.7573	YER114C
YER115C	chrV	394177	395073		50.9747	37.2462	26.8314	19.0125	23.6996	21.0009	19.1535	26.1443	22.0915	17.2381	YER115C
YER116C	chrV	394984	396271		63.754	50.0985	28.2858	22.2693	34.6556	28.6038	28.4022	35.2186	30.3769	25.306	YER116C
YER117W	chrV	396645	397718	2_RPG	652.363	239.238	405.312	147.252	358.072	105.088	65.7496	361.677	206.884	114.886	YER117W
YER118C	chrV	397771	399261		66.2796	60.0942	30.591	28.4855	31.2779	31.663	26.9694	30.9833	27.6142	26.9028	YER118C
YER119C	chrV	399400	400875		45.1098	50.903	17.6004	17.7035	24.4897	30.0114	29.1021	21.8266	22.3374	23.7898	YER119C
YER120W	chrV	401072	401973		124.773	125.266	62.5356	62.2581	66.7436	66.1708	66.152	63.1711	65.8675	65.256	YER120W
YER122C	chrV	402752	404432		135.016	136.555	69.361	73.06	60.5856	65.7914	67.9107	64.0601	67.2193	68.2381	YER122C
YER123W	chrV	404615	406720		77.9259	78.2581	38.042	37.3619	30.7358	35.0717	37.8459	32.613	35.1891	34.8071	YER123W
YER124C	chrV	407030	409102		301.448	306.419	177.743	181.262	181.867	175.631	216.093	184.73	160.453	185.599	YER124C
YER125W	chrV	409684	413119		89.6114	98.1157	44.1828	48.3107	39.3238	53.2114	56.0845	41.4017	45.2513	46.5679	YER125W
YER126C	chrV	413009	414275	1_RiBi	193.565	186.369	138.687	148.453	96.3589	92.9873	95.7474	106.371	105.17	108.874	YER126C
YER127W	chrV	414450	415642	1_RiBi	135.193	133.74	90.7714	103.153	60.0523	66.7898	65.1164	67.446	69.6526	68.5694	YER127W
YER128W	chrV	415767	416596		51.1047	52.5955	22.2697	25.4838	26.1142	26.6539	26.8992	25.7708	27.9413	29.6733	YER128W
YER129W	chrV	416756	420949		63.5846	67.081	32.5025	33.9073	25.4675	31.3386	33.978	28.3302	30.0655	30.2484	YER129W
YER130C	chrV	420895	422541		90.2726	95.6075	41.9822	46.7518	39.4167	40.4379	46.185	39.1944	40.8071	44.289	YER130C
YER131W	chrV	423590	424456	2_RPG	577.626	270.682	333.467	153.239	306.058	139.232	111.556	319.275	211.803	147.093	YER131W
YER132C	chrV	425053	430902		63.4689	65.3192	30.9154	34.0515	27.1338	33.3837	33.0239	29.3263	28.5072	30.6537	YER132C
YER133W	chrV	432425	434187		189.92	198.771	91.7121	93.1519	86.5951	91.4058	100.248	90.2047	93.7191	99.2877	YER133W
YER134C	chrV	437014	437857		53.0556	57.5123	24.4352	25.5435	26.781	28.6854	32.6133	26.6224	30.2663	31.7209	YER134C
YER136W	chrV	439470	441297		71.526	70.3227	31.8675	29.8072	32.5088	36.408	34.402	32.2155	34.5491	33.5176	YER136W
YER137C	chrV	441204	441838		47.0467	42.6776	23.0386	25.7575	21.3003	18.5634	21.7252	23.0043	21.661	21.1185	YER137C
YER140W	chrV	451506	453306		50.8277	51.3377	24.4921	26.736	25.5177	29.269	29.3568	27.0993	25.9155	30.2337	YER140W
YER141W	chrV	453395	455117		78.0839	96.3357	32.8057	36.4283	38.0182	58.1778	62.3857	38.3702	42.6364	51.2396	YER141W
YER142C	chrV	455111	456127		28.7126	28.2315	11.5406	10.4959	13.9015	20.6348	15.5541	12.6142	15.7837	13.4788	YER142C
YER143W	chrV	456248	457715		55.7928	54.2566	26.9983	25.2545	26.2637	42.5174	32.7947	27.7331	33.9672	26.1388	YER143W
YER144C	chrV	457691	460231		48.2829	57.9985	22.2523	26.6971	22.5086	31.7221	33.4847	23.6295	26.4471	28.6642	YER144C
YER145C	chrV	460423	461784		135.59	161.722	87.2355	93.5152	84.4039	56.4446	56.7168	84.4653	74.9027	76.6894	YER145C
YER146W	chrV	462529	462951		95.168	96.8387	45.3803	47.9487	58.3064	53.667	49.6761	56.8658	57.6154	56.4162	YER146W
YER147C	chrV	462888	464842		41.3005	45.2146	22.017	25.3505	22.4542	35.4458	28.5296	21.3419	23.8394	22.3564	YER147C
YER148W	chrV	465091	466215		150.167	160.406	98.6165	105.032	76.7728	75.0113	87.257	79.7145	85.8935	91.7991	YER148W
YER149C	chrV	466081	467546		49.6237	45.414	23.7845	25.0831	21.2958	25.0655	23.7468	21.9597	24.9338	22.5712	YER149C
YER150W	chrV	468334	468981		14.2378	19.9598	9.884	12.0138	7.7166	15.8905	15.1164	7.47423	8.94332	10.2665	YER150W
YER151C	chrV	469619	472597		70.2187	73.4769	37.7263	41.5977	30.8714	37.6509	38.7155	31.7051	34.6482	36.1957	YER151C
YER152C	chrV	472603	474018		44.1881	44.3375	19.0828	18.9286	23.7402	22.0073	19.6272	20.3991	18.4069	19.5652	YER152C
YER154W	chrV	474999	476295		98.2377	97.0933	43.0277	47.157	52.736	47.8513	44.5788	47.2955	45.5745	45.8915	YER154W
YER155C	chrV	476212	483117		94.3386	86.8849	47.9765	47.6535	37.6473	38.0602	41.599	42.0578	41.0925	40.7709	YER155C
YER156C	chrV	483209	484356		153.967	154.941	83.6195	93.7938	77.0357	68.2359	67.9986	74.9894	77.6901	76.3292	YER156C
YER157W	chrV	484764	487229		55.0966	53.8358	26.2383	27.5995	22.5684	23.0812	24.7903	25.9176	25.9457	26.2249	YER157W
YER158C	chrV	488755	490780	3_MSN2	36.1303	46.4318	14.384	18.9567	16.2691	21.6006	22.0318	16.1469	17.7761	21.3072	YER158C
YER159C	chrV	491387	492168		130.636	174.119	74.1636	92.2101	70.6338	55.2035	62.0842	65.9569	63.3655	79.2585	YER159C
YER161C	chrV	499074	500394		69.227	73.4006	43.297	45.2207	33.3634	34.9486	36.624	34.5024	36.5393	35.4642	YER161C
YER162C	chrV	500599	502931		27.314	34.2859	14.7894	17.0152	14.3788	17.1087	18.2845	14.846	15.8835	17.9906	YER162C
YER163C	chrV	502976	503789		36.2553	45.2685	18.226	18.5547	28.4431	32.8551	32.2777	24.815	28.5294	32.3697	YER163C
YER164W	chrV	505079	509923		60.9151	61.4939	31.8305	34.0986	26.268	24.6094	25.373	29.6201	27.3559	27.2066	YER164W
YER165W	chrV	510230	512258		264.494	254.76	148.262	150.587	119.391	89.5736	98.2072	124.94	114.951	123.185	YER165W
YER166W	chrV	512443	517544		50.5722	55.6449	25.8458	27.6322	23.1803	24.4084	26.7637	24.9093	25.3515	26.5507	YER166W
YER167W	chrV	517839	520783		68.3469	64.5581	34.2143	30.151	29.2376	24.8431	26.0524	29.9932	26.2556	27.0688	YER167W
YER168C	chrV	520966	522725		58.14	59.2733	29.2607	30.2091	26.2325	31.7268	32.7247	28.575	31.2063	30.1268	YER168C
YER169W	chrV	523087	525963		47.9961	56.5912	24.5991	29.8593	20.4397	30.2363	30.8342	22.5787	24.7163	27.4415	YER169W
YER170W	chrV	525912	526996		41.1625	47.4206	21.3317	21.3666	23.7311	22.2924	23.1705	23.4589	24.9253	26.2377	YER170W
YER171W	chrV	526934	529537		49.499	50.2485	24.0442	26.9839	19.5529	24.1406	26.7634	21.3225	25.0215	24.68	YER171W
YER172C	chrV	529411	536077		54.0154	57.3535	29.14	32.9222	22.1844	25.5854	28.9857	25.9646	26.2944	27.9709	YER172C
YER173W	chrV	536269	538342		40.5159	36.8519	19.8164	18.9405	18.2155	22.7524	20.8649	18.7487	20.6862	19.2228	YER173W
YER174C	chrV	538319	539308		49.966	52.9496	22.952	24.6617	27.4774	31.0625	30.8972	26.8138	27.4753	27.9128	YER174C
YER175C	chrV	539300	540403		37.6796	44.8028	18.5691	21.9784	20.9106	33.4354	33.1503	20.4327	22.8037	25.0297	YER175C
YER176W	chrV	541647	545155		107.06	116.609	45.4172	49.4561	55.2278	56.8804	57.4187	56.2151	57.3975	58.6744	YER176W
YER177W	chrV	545555	546591		343.769	405.781	153.514	175.051	175.787	155.531	164.908	166.777	175.442	191.314	YER177W
YER178W	chrV	546756	548213		110.298	130.063	46.0494	52.4804	50.5118	59.8853	63.9613	47.388	51.113	56.9054	YER178W
YER182W	chrV	552489	553332		36.4332	41.6769	18.24	20.3818	21.0994	24.8766	27.1888	19.2505	22.0061	25.1963	YER182W
YER183C	chrV	553251	554005		50.6113	52.1917	22.3949	26.095	24.1908	26.1478	26.384	25.8446	27.3979	29.2196	YER183C
YER184C	chrV	555965	559051		27.5457	30.3128	11.7055	12.5338	11.1721	19.327	17.4621	11.5509	13.8222	13.0656	YER184C
YER185W	chrV	559317	560420		12.3333	13.4395	5.35893	5.92052	5.68758	10.5255	8.17794	5.74661	6.40921	6.55401	YER185W
YER186C	chrV	561441	562817		43.9075	44.7162	21.8507	23.4093	21.2985	22.5412	24.6213	21.6518	22.4383	23.894	YER186C
YER188W	chrV	568032	568925		6.98962	9.097	3.54991	4.70414	3.31704	5.36588	6.59169	3.57887	3.232	5.81271	YER188W
YFL062W	chrVI	6425	7664		18.6302	21.1335	10.7136	12.135	9.56726	13.6777	15.3239	10.3378	11.911	13.5235	YFL062W
YFL061W	chrVI	9480	10335		12.6281	15.9982	6.42834	7.17829	6.21697	10.5309	10.1194	6.29846	6.90319	7.71811	YFL061W
YFL059W	chrVI	11196	12396		9.64213	11.1146	5.03038	6.28751	6.45718	8.81277	8.04285	5.41546	6.39479	6.05042	YFL059W
YFL058W	chrVI	12897	14056		9.45794	11.0071	3.58608	4.52719	4.93233	5.92899	6.06515	4.52318	4.11723	5.55384	YFL058W
YFL054C	chrVI	20846	22825		16.3941	19.0698	7.43088	8.93873	9.00919	12.9303	14.9039	8.20983	10.0898	10.7907	YFL054C
YFL053W	chrVI	23367	25502		12.136	13.8159	5.53581	6.92269	5.2397	10.7966	11.0145	5.08672	6.84519	7.27042	YFL053W
YFL052W	chrVI	28221	29829		9.71716	12.4015	3.59693	5.49943	4.89713	11.4511	10.6255	4.52016	5.99654	6.79405	YFL052W
YFL051C	chrVI	29875	30564		8.00708	12.3874	4.00618	5.95971	3.87829	10.1608	9.29932	3.11102	4.29679	5.34639	YFL051C
YFL050C	chrVI	32954	36271		36.7128	42.1616	17.667	20.9235	15.2926	19.807	21.8945	16.1022	17.2419	19.8196	YFL050C
YFL049W	chrVI	36771	38765		50.3466	58.5865	25.1851	28.2253	21.1693	24.7134	28.5304	22.6733	22.5345	26.4517	YFL049W
YFL048C	chrVI	38725	40226		52.6795	59.6557	25.6414	26.5186	26.5274	34.0063	34.0803	24.6869	28.4341	29.418	YFL048C
YFL047W	chrVI	40412	42630		42.9457	44.7903	20.2967	24.0338	18.8461	24.7762	25.1483	19.4299	19.9976	22.2031	YFL047W
YFL046W	chrVI	42744	43588		72.8291	78.7634	34.6227	37.2068	34.2193	42.307	43.5447	36.2848	41.397	41.4259	YFL046W
YFL045C	chrVI	43468	44466		258.01	283.452	144.963	153.01	146.099	148.081	165.613	148.596	151.013	161.397	YFL045C
YFL044C	chrVI	44520	45597		111.698	110.501	50.9179	55.2055	76.6345	86.4035	73.9993	72.4544	72.2328	67.5952	YFL044C
YFL042C	chrVI	45657	47776		28.4221	33.5758	12.536	14.8354	15.6594	21.8538	20.8468	15.2169	15.4649	16.3252	YFL042C
YFL041W	chrVI	49116	51188		33.8392	36.8901	15.8071	18.4693	16.5091	22.1962	19.7725	16.6021	18.0688	18.5891	YFL041W
YFL039C	chrVI	53156	54902		459.623	517.333	228.799	249.656	233.022	251.587	269.632	235.677	229.926	251.445	YFL039C
YFL038C	chrVI	55259	56068		155.625	178.267	85.1102	88.8077	97.8537	112.584	108.703	91.4183	94.6701	97.9652	YFL038C
YFL037W	chrVI	56259	57935		94.1159	106.083	45.7635	49.9068	48.578	55.2871	55.43	46.3097	46.4582	50.0925	YFL037W
YFL036W	chrVI	58533	62877		59.7639	61.806	31.6729	33.2996	28.8112	35.3516	36.0853	31.4618	34.089	34.0695	YFL036W
YFL034C-B	chrVI	62842	64056		80.5907	85.0893	41.7906	48.0552	40.2529	42.3026	45.3947	41.3706	39.5651	45.3861	YFL034C-B
YFL034C-A	chrVI	64180	64973	2_RPG	688.101	262.131	345.821	123.623	333.882	109.767	79.8473	355.443	209.699	126.019	YFL034C-A
YFL034W	chrVI	65285	68817		27.3628	27.9477	13.7297	13.2808	14.2119	15.6444	16.1752	14.1045	12.5837	13.2346	YFL034W
YFL033C	chrVI	68792	74667		38.0564	41.7257	17.0446	18.5151	16.6161	26.7847	25.3374	16.6783	19.6744	19.8826	YFL033C
YFL031W	chrVI	75112	76563		300.462	374.659	134.487	172.211	171.374	177.541	203.279	163.295	157.732	179.487	YFL031W
YFL030W	chrVI	76707	78075		18.7106	21.2696	7.68223	8.64545	11.2436	13.7359	13.4503	10.6482	8.78188	12.0565	YFL030W
YFL029C	chrVI	77986	79199		24.0021	27.0944	12.3945	13.3607	12.6282	14.8173	14.6632	12.8131	13.4073	14.3471	YFL029C
YFL028C	chrVI	79268	80255		41.1315	42.406	23.5237	23.0367	22.3402	22.1391	23.1501	20.9244	22.9032	23.9194	YFL028C
YFL027C	chrVI	80351	81931		33.2962	34.0822	17.5738	19.9563	29.5481	33.0295	34.8372	30.5652	30.5997	31.7726	YFL027C
YFL026W	chrVI	82549	84047		14.22	18.473	6.57204	7.74796	205.741	157.271	199.882	208.191	178.278	212.863	YFL026W
YFL025C	chrVI	83717	87312		40.534	43.5491	17.7344	21.0035	29.3505	36.5006	37.7706	31.4565	32.1631	34.3555	YFL025C
YFL024C	chrVI	87702	90618		117.018	128.476	55.4818	61.9691	52.3956	52.5243	59.7134	56.748	51.761	58.0724	YFL024C
YFL023W	chrVI	90965	93429		51.5555	47.4906	30.9494	33.5517	21.6373	36.4367	26.7389	24.4076	25.4737	21.298	YFL023W
YFL022C	chrVI	93396	95104		114.773	111.018	56.9381	60.0157	52.2294	55.0817	52.0552	53.1209	55.4748	55.7177	YFL022C
YFL021W	chrVI	95965	97631		142.306	141.006	44.8936	51.108	50.8082	51.5146	50.1016	47.8621	41.9262	44.3516	YFL021W
YFL020C	chrVI	99190	99756		7.41145	9.40645	3.03728	4.00931	3.00027	6.62182	4.99569	3.65841	3.56799	4.47929	YFL020C
YFL018C	chrVI	101543	103229		58.5279	60.111	28.1977	30.3836	31.7319	39.3694	39.0886	29.9478	32.7735	33.976	YFL018C
YFL017W-A	chrVI	103639	104003		54.0293	52.7953	25.6312	26.0032	29.2292	34.584	34.0029	32.3052	36.4528	37.2607	YFL017W-A
YFL017C	chrVI	103783	104511		56.6194	59.1542	24.4608	25.6842	30.8073	36.1066	31.2991	30.8959	32.1553	36.3696	YFL017C
YFL016C	chrVI	104597	106320	4_HSF1	116.137	110.44	44.0461	39.1734	62.256	184.86	95.3967	51.5939	74.7352	46.2479	YFL016C
YFL014W	chrVI	107196	107810		13.8882	14.6175	7.83806	8.5859	16.9872	31.4455	41.8625	12.6277	17.5092	27.4102	YFL014W
YFL013C	chrVI	107762	109962		56.4312	59.7041	29.8413	31.8453	26.2311	30.9864	31.7663	26.7415	28.7019	28.4397	YFL013C
YFL011W	chrVI	112324	113985		1.5274	1.58113	0.766346	0.690163	0.923371	3.43963	1.81728	1.0635	0.767315	0.856297	YFL011W
YFL010C	chrVI	114945	115771		55.2245	62.5966	24.0512	27.2994	26.9122	27.2169	25.6418	24.6274	26.325	25.4656	YFL010C
YFL009W	chrVI	115952	118571		41.8159	40.0123	21.0057	22.7023	20.4183	21.7393	21.5442	20.1603	20.8099	21.5615	YFL009W
YFL008W	chrVI	119375	123210		65.063	72.1555	38.0202	40.6297	30.6712	34.4726	35.411	33.1795	32.5027	32.7135	YFL008W
YFL007W	chrVI	123336	129988		51.448	50.321	24.8358	26.1252	22.5257	33.6086	32.1907	24.3572	29.5527	24.6469	YFL007W
YFL005W	chrVI	130121	131199		100.66	113.808	44.9063	49.4697	44.154	45.1298	45.8455	44.5315	46.5108	51.4679	YFL005W
YFL004W	chrVI	131666	134372		92.5889	104.967	32.4724	38.2689	31.5816	31.8254	36.1783	33.1636	34.2692	35.5769	YFL004W
YFL002C	chrVI	144985	146946		74.9806	75.9558	44.9746	49.2619	35.1294	37.6841	40.1549	38.094	38.8834	39.6284	YFL002C
YFL001W	chrVI	147092	148493		83.4163	86.8636	51.5958	54.4597	41.6552	41.5432	44.0688	44.5235	45.22	48.1367	YFL001W
YFR001W	chrVI	149028	149819	1_RiBi	155.89	150.561	89.248	97.6341	74.2962	73.6769	71.7558	80.565	84.9949	86.4795	YFR001W
YFR002W	chrVI	149985	152618		81.3446	77.4543	41.3926	41.6561	34.45	43.483	43.1044	37.7456	39.0913	37.9897	YFR002W
YFR003C	chrVI	152519	153192		69.9448	75.7973	28.4944	28.2502	36.9765	46.8222	42.9449	35.2372	39.5532	37.8085	YFR003C
YFR004W	chrVI	153343	154372		141.219	140.038	74.9766	72.8536	75.2821	94.8251	77.8354	70.5371	80.9016	68.7463	YFR004W
YFR005C	chrVI	154317	155916		94.0505	94.0298	48.3942	48.4525	50.2112	52.0808	49.4617	51.9069	51.9028	52.841	YFR005C
YFR006W	chrVI	156104	157842		70.8891	76.749	40.6555	40.4958	42.3567	49.607	45.8268	40.9675	45.3453	44.6538	YFR006W
YFR007W	chrVI	159278	160428		37.3598	44.6597	15.8324	18.3356	21.0263	26.2169	26.1851	19.9787	23.0258	26.586	YFR007W
YFR008W	chrVI	160491	161539		25.15	31.687	13.2294	13.9593	13.8499	16.1267	17.554	13.5981	15.1249	17.9617	YFR008W
YFR009W	chrVI	162411	164939	1_RiBi	111.954	121.568	63.397	74.9102	52.6828	53.7707	59.4658	58.2334	56.3502	62.5296	YFR009W
YFR010W	chrVI	164984	166658		96.4049	99.1406	52.9086	51.4094	50.3004	72.1762	63.4846	51.2767	60.3854	55.6231	YFR010W
YFR011C	chrVI	166527	167301		83.775	80.5915	41.7841	43.2632	46.9367	45.88	49.1844	45.3064	52.0586	50.5026	YFR011C
YFR013W	chrVI	169861	172360		44.7199	47.1852	20.9638	24.9295	19.4181	24.0817	22.5504	20.4864	22.8661	22.3999	YFR013W
YFR014C	chrVI	172343	173935		48.8417	55.0492	19.8958	19.7865	23.6727	33.4489	30.5029	21.7111	26.2033	25.8062	YFR014C
YFR015C	chrVI	174127	176479		26.4516	33.9566	6.99878	8.71003	13.8008	33.3469	29.9376	11.0793	14.0314	16.2247	YFR015C
YFR016C	chrVI	176990	180857		38.4903	43.2762	20.5612	21.9656	18.4654	22.8386	23.7869	18.7109	19.8516	21.5879	YFR016C
YFR017C	chrVI	182201	182938		9.33372	13.9586	2.75856	3.32678	5.17708	13.5536	13.0388	4.03453	5.08265	7.13712	YFR017C
YFR018C	chrVI	182988	184282		23.5314	25.2753	8.0778	10.3014	12.5239	14.7872	12.9421	10.0668	10.2963	11.0608	YFR018C
YFR019W	chrVI	184491	191389		32.3995	35.4127	15.0497	15.9358	14.7113	19.1467	19.7277	15.4808	15.7586	16.7652	YFR019W
YFR021W	chrVI	194717	196425		39.3895	49.9444	16.1908	19.7504	19.0491	22.1645	23.5612	18.7279	18.9628	20.8126	YFR021W
YFR022W	chrVI	196545	199142		26.1856	31.3947	10.3401	13.0727	12.0562	18.8062	20.6326	11.7601	13.8782	17.5499	YFR022W
YFR024C-A	chrVI	201808	203469		49.5216	48.2297	22.8521	23.4891	24.4525	34.8533	30.9034	23.7718	28.8887	24.7149	YFR024C-A
YFR025C	chrVI	203654	204789		42.1467	43.4913	18.0912	19.1686	24.667	25.698	24.7663	21.7768	21.4924	22.4239	YFR025C
YFR027W	chrVI	207376	208387		29.8827	34.5258	16.4788	18.6118	17.5396	19.1292	19.5858	16.4262	16.1139	17.3854	YFR027W
YFR028C	chrVI	208248	210135		68.9484	72.2231	36.4278	39.7819	32.2603	34.2475	36.7885	34.2499	32.6982	34.1651	YFR028C
YFR029W	chrVI	210872	213047		41.6937	41.4167	17.6042	18.6082	20.1111	25.6966	22.9055	19.2009	19.621	19.5855	YFR029W
YFR030W	chrVI	213257	216477		48.0461	44.5498	22.6721	21.006	22.4958	30.4935	26.3143	21.8421	22.7229	20.8145	YFR030W
YFR031C	chrVI	216536	220150		52.1953	48.92	26.3691	25.983	22.8396	25.5669	24.0969	25.0945	21.608	22.6876	YFR031C
YFR031C-A	chrVI	220346	221441	2_RPG	563.96	231.244	334.36	136.819	324.142	98.2886	65.184	301.803	170.335	104.841	YFR031C-A
YFR032C-B	chrVI	223160	223973	2_RPG	816.587	363.463	483.863	212.706	524.097	168.338	131.34	494.374	300.18	190.147	YFR032C-A
YFR032C-A	chrVI	223160	223792		882.608	385.908	528.304	226.968	495.077	159.276	124.81	466.121	283.851	183.419	YFR032C-B
YFR033C	chrVI	224181	224889		229.792	259.722	129.734	135.871	178.853	184.338	183.759	148.895	140.911	161.468	YFR033C
YFR034C	chrVI	224790	225992		130.619	150.658	61.4947	65.6893	106.493	113.998	89.995	87.8288	75.9901	80.0036	YFR034C
YFR036W	chrVI	226940	227394		47.9682	50.3559	19.1766	21.6846	23.8262	33.6076	26.724	23.9354	23.1969	21.9404	YFR036W
YFR037C	chrVI	227393	229223		90.3078	96.3803	48.8217	52.7801	45.7369	53.6516	52.8362	44.5381	45.2707	46.3127	YFR037C
YFR038W	chrVI	229379	232032		40.44	38.8859	19.8421	19.3511	17.5918	21.4266	20.7915	18.3322	18.7946	17.4427	YFR038W
YFR039C	chrVI	231943	233685		46.3506	52.3434	22.581	26.9634	22.8524	24.8085	26.9986	22.8129	24.1054	25.9843	YFR039C
YFR040W	chrVI	233925	237351		103.655	104.209	58.9611	63.0377	44.9909	56.4258	57.7444	49.9193	51.956	51.8668	YFR040W
YFR041C	chrVI	237272	238289		52.6433	66.5149	26.6428	33.7404	28.0447	29.4486	36.0942	29.2811	29.564	35.5445	YFR041C
YFR042W	chrVI	238400	239147		42.0676	50.4548	19.1944	22.2504	22.9623	25.6751	25.914	22.9541	25.2081	25.6159	YFR042W
YFR044C	chrVI	239937	241454		76.2385	90.0797	37.4658	43.7869	39.7524	50.9113	53.8504	39.53	40.6935	47.0086	YFR044C
YFR045W	chrVI	241981	243105		28.6264	36.7174	14.321	16.4354	16.5185	22.0329	24.1099	16.014	18.2406	19.3795	YFR045W
YFR046C	chrVI	243000	244159		36.9055	43.93	18.9575	20.1552	19.5501	23.2396	23.4942	19.6502	19.7025	20.263	YFR046C
YFR047C	chrVI	244200	245210		38.2145	43.264	15.9362	18.6073	18.7269	23.057	25.188	17.4259	17.8098	21.4614	YFR047C
YFR048W	chrVI	246079	248171		50.9362	55.9336	26.4576	30.4	24.2067	27.469	30.1208	24.4784	25.314	28.0824	YFR048W
YFR049W	chrVI	248336	249014		44.6834	47.7854	17.5377	17.6108	24.5445	34.0285	34.6009	23.0179	25.5444	26.792	YFR049W
YFR050C	chrVI	248926	249918		128.35	115.184	59.4457	55.2453	65.1873	94.2993	79.4896	63.0208	75.929	60.4815	YFR050C
YFR051C	chrVI	250090	251855		97.7727	101.632	43.9954	49.8793	48.5649	63.3057	60.9757	47.2672	49.1901	48.7639	YFR051C
YFR052W	chrVI	252464	253463		141.537	136.755	72.5977	66.0089	68.1761	91.1678	87.1236	68.3297	80.8565	69.6556	YFR052W
YFR053C	chrVI	253422	255167		38.9715	64.94	9.98328	10.2758	41.0372	100.771	116.937	24.7015	34.8923	50.3014	YFR053C
YFR055W	chrVI	264161	265614		342.907	369.539	162.51	197.59	139.409	133.865	166.185	154.144	139.926	170.142	YFR055W
YGL263W	chrVII	2777	4021		0	0	0	0.0164791	0	0	0	0	0	0	YGL263W
YGL261C	chrVII	6129	6670		0.433512	0.321386	0.263623	0.181867	0.306192	0.499039	0.509298	0.320296	0.145656	0.304695	YGL261C
YGL259W	chrVII	8231	9460		5.20152	10.7669	2.30754	3.52095	3.19801	5.59007	7.30545	2.48579	2.72124	5.05422	YGL259W
YGL257C	chrVII	12395	14320		52.7378	54.1478	24.5578	27.3613	21.15	32.4625	32.3528	22.2489	25.26	25.4381	YGL257C
YGL256W	chrVII	14465	16480		93.8242	101.279	48.7124	53.6543	43.1013	47.8856	50.1863	46.391	46.9538	48.6847	YGL256W
YGL255W	chrVII	20956	22198		52.5083	64.9847	28.5966	38.8457	24.1554	36.7734	36.9356	26.0442	30.2159	31.689	YGL255W
YGL254W	chrVII	22281	23787		64.7503	67.7902	32.6433	35.8194	46.0266	56.1693	41.0175	45.1888	42.9135	43.0631	YGL254W
YGL253W	chrVII	23887	25583		386.668	367.365	208.37	202.599	215.769	241.23	198.294	218.288	213.751	185.898	YGL253W
YGL252C	chrVII	25625	27543		64.4623	67.5347	32.4983	34.2671	30.8304	44.097	41.7226	33.8118	35.3403	33.7476	YGL252C
YGL250W	chrVII	31868	32831		22.6572	29.2698	9.19609	11.461	11.0791	30.6528	29.0164	11.0806	16.152	17.268	YGL250W
YGL248W	chrVII	35588	36818		56.9301	80.6569	27.0055	35.7353	26.7504	35.9173	45.4805	26.1567	29.5059	40.0961	YGL248W
YGL247W	chrVII	36912	37557		62.3345	66.2201	29.9424	34.6358	34.5541	37.6326	38.3654	34.6883	33.1764	34.6815	YGL247W
YGL246C	chrVII	37496	38819		75.211	80.1534	43.6764	49.3318	33.9676	42.5002	44.3426	39.6292	39.6115	41.2913	YGL246C
YGL245W	chrVII	38976	41211		118.497	121.638	57.8647	61.7972	54.8578	62.805	62.2486	58.1056	59.24	59.0834	YGL245W
YGL244W	chrVII	41422	43263		72.0863	78.93	41.2106	45.866	33.5119	39.7855	41.7955	34.6698	37.6565	37.4088	YGL244W
YGL243W	chrVII	43306	44644		32.7145	35.7034	17.1736	18.4976	14.7212	16.448	16.8984	15.8237	16.3184	15.8888	YGL243W
YGL242C	chrVII	44525	45264		46.3146	55.516	20.4687	23.3697	23.5439	26.7625	31.6988	21.8609	22.8162	28.4791	YGL242C
YGL241W	chrVII	45412	48557		35.0846	37.5089	16.1562	16.9835	14.8695	23.0986	22.0062	16.4561	18.2892	18.1865	YGL241W
YGL240W	chrVII	48611	49453		56.5963	57.7142	25.3937	29.5792	30.3104	41.6328	35.9541	29.3347	33.1094	32.4022	YGL240W
YGL238W	chrVII	49508	52534		102.391	104.622	49.5642	51.955	43.333	58.3606	59.8007	46.8491	53.7628	52.7643	YGL238W
YGL237C	chrVII	52363	53611	3_MSN2	45.1983	54.6112	20.1543	22.502	23.7963	32.2337	33.3029	22.4548	23.7496	26.9702	YGL237C
YGL236C	chrVII	53740	55815		31.8879	34.8321	13.8383	15.4245	15.4927	21.4142	17.8793	14.756	14.6611	14.4866	YGL236C
YGL234W	chrVII	56375	59001		76.2181	84.3391	35.4849	41.4615	32.8816	42.5255	38.485	33.4007	36.557	35.6512	YGL234W
YGL233W	chrVII	59075	61920		44.6167	45.5228	20.8144	23.179	17.8451	22.6314	24.8704	19.9227	22.8879	22.6075	YGL233W
YGL232W	chrVII	62044	63075		70.6206	75.0625	39.0571	40.8148	30.3976	32.8862	37.8893	34.0729	35.7895	37.8498	YGL232W
YGL231C	chrVII	63000	63639		78.893	103.618	38.9081	50.4895	39.4502	42.4028	48.6212	40.4063	43.8724	52.2109	YGL231C
YGL229C	chrVII	64341	67225		18.9172	21.4861	7.52678	8.4294	7.38852	11.988	12.559	8.2665	9.72263	9.62087	YGL229C
YGL228W	chrVII	67543	69484		63.1545	65.2123	36.2894	36.4754	35.5233	46.0776	41.8992	34.6544	36.5058	34.9272	YGL228W
YGL227W	chrVII	69619	72665		27.2402	31.4057	12.6195	12.4728	12.8653	19.9979	22.0877	13.1278	14.7833	16.0611	YGL227W
YGL226C-A	chrVII	72610	73234		80.6246	81.4829	37.7344	40.0421	46.9276	47.9721	47.9083	43.5274	43.9962	46.2453	YGL226C-A
YGL226W	chrVII	73339	73812		55.2986	63.4779	27.0156	25.143	40.1817	42.089	41.3536	34.3579	36.5015	38.1717	YGL226W
YGL225W	chrVII	76774	78020		196.507	223.047	97.5786	113.912	97.109	101.592	109.839	94.847	98.6645	112.129	YGL225W
YGL224C	chrVII	77941	78958		60.4005	73.1076	24.1563	29.1504	25.9333	31.5023	32.1223	25.1546	28.1376	29.9802	YGL224C
YGL223C	chrVII	78970	80377		49.0118	51.1268	22.6495	24.0421	20.043	23.4251	24.8575	20.4159	23.597	23.9034	YGL223C
YGL222C	chrVII	80599	81237		126.266	144.366	55.9876	66.1702	55.0084	68.3442	74.6291	52.6041	56.0506	65.3254	YGL222C
YGL221C	chrVII	81347	82310		73.47	89.0165	35.1521	41.1303	44.8787	58.3029	54.9186	40.4299	43.553	46.5573	YGL221C
YGL220W	chrVII	82373	82917		71.1874	77.1922	33.5251	40.0274	42.6432	48.5494	53.0761	38.2976	41.1167	45.6728	YGL220W
YGL219C	chrVII	82792	84281		61.2157	65.7956	27.3949	30.9493	28.4704	37.2671	37.8657	27.5771	29.9747	32.8448	YGL219C
YGL216W	chrVII	84631	87638		61.7492	63.9712	29.4652	32.6474	28.9254	33.7091	33.9048	29.1752	31.4459	33.2252	YGL216W
YGL215W	chrVII	87598	89638		115.639	126.731	56.2903	66.7111	46.5095	56.1486	64.8838	49.1212	55.588	57.2835	YGL215W
YGL213C	chrVII	89939	91282		59.9486	65.4282	33.5091	35.7419	30.3178	35.6584	37.916	31.3269	33.4689	35.2126	YGL213C
YGL210W	chrVII	93751	94568		99.3075	106.893	41.3404	45.4184	50.9219	59.6866	53.4509	52.6151	46.6336	49.4168	YGL210W
YGL209W	chrVII	95728	97123		217.33	204.767	108.506	109.463	109.746	89.7516	82.5313	110.233	103.365	101.035	YGL209W
YGL208W	chrVII	97300	98715		32.5482	35.7706	14.0616	15.876	18.266	26.1163	25.6514	18.0917	19.653	20.1436	YGL208W
YGL207W	chrVII	98862	102207		109.976	111.069	62.194	62.9922	48.6895	66.0413	66.063	52.6232	59.0683	51.8083	YGL207W
YGL206C	chrVII	102253	107610		85.2106	93.1331	39.9955	41.7352	36.8142	48.0496	55.3845	40.0729	43.3631	45.7466	YGL206C
YGL203C	chrVII	112387	114775		45.4581	50.247	24.0808	26.854	21.2621	24.2164	26.6292	21.944	23.2835	25.7854	YGL203C
YGL202W	chrVII	115886	117630		99.8554	103.113	50.9236	54.0155	45.49	49.4338	51.8778	47.2786	51.6717	52.3938	YGL202W
YGL201C	chrVII	117651	120977		49.1961	52.9622	24.3101	27.8516	21.6371	32.08	29.9938	23.6129	26.4268	26.3904	YGL201C
YGL200C	chrVII	122586	123381		98.7008	103.981	50.0183	53.0689	61.7146	60.019	60.6987	53.337	56.2661	59.6527	YGL200C
YGL198W	chrVII	123568	124348		80.3706	97.2515	35.0227	42.1075	51.4642	59.6535	61.2999	43.5106	48.1803	53.1965	YGL198W
YGL196W	chrVII	129817	131281		60.3685	70.0253	25.4793	30.9359	30.7549	36.8554	37.4694	31.4227	30.3143	33.7992	YGL196W
YGL195W	chrVII	131481	139639		91.8857	96.0152	48.7688	54.792	39.7653	44.4359	53.2013	43.8289	46.4391	46.6674	YGL195W
YGL194C-A	chrVII	139570	140207		46.2772	47.2881	20.3699	23.4626	21.2748	21.8699	27.5128	22.5729	25.2462	28.5103	YGL194C-A
YGL194C	chrVII	140263	141777		68.7575	70.8759	32.3096	31.4033	31.8508	37.8007	36.4676	31.7519	35.4013	34.3446	YGL194C
YGL192W	chrVII	142068	144079		86.497	89.2705	40.1419	42.0633	37.6338	51.1445	52.3554	37.4461	41.2707	41.8069	YGL192W
YGL191W	chrVII	144677	145443		120.381	124.994	67.2893	73.1209	90.5415	100.83	109.162	81.2494	92.5461	95.7223	YGL191W
YGL190C	chrVII	145534	147944		102.847	103.199	52.9624	50.6608	45.7488	57.1989	60.0653	50.4239	49.7248	49.9626	YGL190C
YGL189C	chrVII	148158	148966	2_RPG	738.743	305.72	428.598	173.184	374.346	149.259	117.34	394.289	240.576	150.633	YGL189C
YGL188C-A	chrVII	148603	148999		876.346	333.649	474.892	173.527	466.643	157.796	112.005	480.642	277.461	160.575	YGL188C-A
YGL187C	chrVII	149401	150525		124.598	112.371	69.636	62.8804	81.9649	72.2497	81.2876	75.2941	81.4283	83.4583	YGL187C
YGL186C	chrVII	150993	152843		68.3075	64.6831	33.6881	30.1547	34.3347	36.9256	33.1048	33.5272	33.3699	30.114	YGL186C
YGL185C	chrVII	153041	154340		59.5523	60.2989	25.777	27.3517	32.864	36.5114	30.6894	31.3966	34.4089	31.5355	YGL185C
YGL184C	chrVII	154502	156273		15.7413	15.8552	5.59903	5.78211	5.84492	6.40696	7.00232	5.45274	5.41593	6.65198	YGL184C
YGL181W	chrVII	157852	159229		46.5445	53.0739	21.8835	23.8466	22.0609	35.4593	31.6432	21.448	28.0283	25.4599	YGL181W
YGL180W	chrVII	159875	163028		23.0741	21.4217	10.6636	10.5245	9.92258	19.2673	13.8836	10.0711	13.6931	11.3635	YGL180W
YGL179C	chrVII	163314	165180		23.3573	30.9783	9.55197	13.2751	10.9841	26.7743	23.8696	11.1783	14.2004	15.6976	YGL179C
YGL178W	chrVII	166870	171108		86.076	89.5044	43.0285	45.0308	35.3525	55.6384	50.6107	39.2281	45.923	43.3293	YGL178W
YGL174W	chrVII	174517	175446		53.0676	55.3665	26.4965	24.9172	24.4906	34.5935	31.8769	26.2552	27.5923	27.5773	YGL174W
YGL173C	chrVII	175486	180444		108.016	102.076	54.9057	53.6886	45.524	56.3101	58.6801	49.0264	55.6887	49.5563	YGL173C
YGL172W	chrVII	180651	182213		75.459	72.3106	37.13	37.5475	38.013	46.0622	42.8032	37.826	40.477	37.405	YGL172W
YGL171W	chrVII	182353	184171	1_RiBi	90.221	85.773	63.0928	66.914	37.1064	39.3599	39.9748	44.6618	44.472	45.6117	YGL171W
YGL169W	chrVII	185981	187545		57.1346	61.6686	34.3604	39.2192	26.7014	30.2999	30.4792	29.2367	29.0674	31.3166	YGL169W
YGL167C	chrVII	187468	190902		100.594	100.876	45.9399	47.2384	40.7151	48.7024	50.5776	43.1773	46.4927	45.6656	YGL167C
YGL166W	chrVII	191107	191967		31.6832	34.4756	15.6349	16.5355	19.3514	22.8925	19.8064	16.3727	17.056	17.3937	YGL166W
YGL164C	chrVII	191890	193336		46.7926	49.6199	26.2241	25.3363	20.6287	20.9026	22.9519	20.6458	22.1732	24.4345	YGL164C
YGL163C	chrVII	193570	196702		40.1539	42.3048	19.8272	21.5076	16.6845	22.2734	21.1802	17.717	18.1854	19.3819	YGL163C
YGL162W	chrVII	197976	199144		110.632	116.639	67.2432	68.475	52.0797	54.3589	53.9934	54.1652	55.5704	54.5451	YGL162W
YGL161C	chrVII	199063	200250		60.1149	69.0809	28.0747	29.9905	30.1052	39.8057	38.7751	28.379	31.9952	32.1439	YGL161C
YGL160W	chrVII	200423	202407		36.7138	41.228	16.1133	17.6677	16.8651	23.4225	24.9342	17.0517	19.8332	22.2034	YGL160W
YGL159W	chrVII	202697	203916		41.4716	45.7045	20.1194	21.2308	19.2841	18.6774	22.1296	20.7862	23.7371	24.4356	YGL159W
YGL158W	chrVII	206881	208660		6.10304	7.56002	3.323	3.86088	3.13902	4.69961	4.82695	3.02494	3.20245	4.87613	YGL158W
YGL157W	chrVII	208897	210142		67.6562	84.2139	30.9703	38.9531	29.2913	36.1138	42.6959	31.6047	36.7959	43.0093	YGL157W
YGL156W	chrVII	210347	213726		40.4094	42.3111	17.2433	18.4613	17.4837	20.2214	22.4189	18.3685	20.703	21.9356	YGL156W
YGL155W	chrVII	213941	215607		49.0757	43.7194	24.7507	22.9075	22.8732	24.1549	23.1943	22.7545	23.9976	23.0303	YGL155W
YGL154C	chrVII	215275	216099		38.8743	37.6439	16.1138	16.3535	15.7918	21.4918	21.0839	15.745	18.2146	18.9141	YGL154C
YGL153W	chrVII	216218	217347		46.8212	50.8088	22.1244	24.2097	23.9212	25.5534	26.8965	23.0848	23.8472	24.3584	YGL153W
YGL151W	chrVII	217468	221015		53.9081	54.9419	25.3227	26.1827	21.5906	27.4692	30.4914	24.6535	27.1027	26.4455	YGL151W
YGL150C	chrVII	220939	225762		63.4712	61.662	35.7255	32.4416	28.7315	32.4459	33.2967	29.4775	29.5852	29.2182	YGL150C
YGL148W	chrVII	226294	227634		91.2385	66.7764	48.5568	39.4727	50.0982	41.8843	33.9577	48.4947	39.8923	33.1642	YGL148W
YGL147C	chrVII	227624	228375	2_RPG	818.614	494.27	378.546	243.202	402.975	177.015	179.551	331.051	294.942	237.187	YGL147C
YGL146C	chrVII	228443	229773		86.631	79.8246	43.2181	37.9965	59.3514	40.0014	38.4946	58.1316	43.2537	45.1259	YGL146C
YGL145W	chrVII	230170	232468		38.1413	39.8861	19.1402	18.5592	16.0672	18.1068	19.7097	17.026	17.0801	16.8075	YGL145W
YGL143C	chrVII	234643	235991		38.0348	40.8233	17.7173	18.618	17.4167	18.7484	18.9776	18.3259	17.2413	19.8514	YGL143C
YGL142C	chrVII	236125	238163		39.5309	42.3216	18.4224	19.0621	18.3614	18.3848	21.7019	19.4607	21.0147	21.5543	YGL142C
YGL141W	chrVII	238310	241214		32.3936	33.023	13.2288	13.9975	14.2508	18.2779	19.5007	14.397	16.9046	16.0707	YGL141W
YGL140C	chrVII	241109	245198		57.3367	59.1584	27.9678	31.1526	23.1443	26.1976	29.8159	25.7392	25.7852	27.7868	YGL140C
YGL139W	chrVII	245401	248459		37.181	36.5052	17.7781	18.3235	15.3528	18.4216	19.0485	16.0901	17.8926	16.8785	YGL139W
YGL137W	chrVII	249844	252910		100.937	105.905	53.8345	56.7807	47.0587	54.2448	59.1388	49.6649	52.743	52.7809	YGL137W
YGL136C	chrVII	252784	253927		56.2686	49.5725	24.9701	20.4333	25.1554	27.441	25.5067	28.7504	23.0541	23.031	YGL136C
YGL135W	chrVII	254517	255388	2_RPG	709.743	345.409	386.166	195.7	411.568	171.937	136.309	375.677	278.093	189.628	YGL135W
YGL134W	chrVII	255565	257072		63.3352	65.1246	27.0773	31.1388	28.5992	31.4694	33.8271	28.8649	31.0018	33.0885	YGL134W
YGL133W	chrVII	257505	261689		56.8981	65.4282	27.298	31.4746	24.5488	33.0816	39.9027	27.0655	31.6151	32.7342	YGL133W
YGL131C	chrVII	261545	265930		33.835	37.3776	16.1797	16.2817	14.1816	20.1015	20.867	15.6205	16.7602	16.5575	YGL131C
YGL130W	chrVII	266083	267665		43.153	48.4157	22.1247	24.9502	20.6848	25.4532	26.588	20.624	22.6489	24.0473	YGL130W
YGL129C	chrVII	267595	269188		51.8232	53.1304	25.4001	25.5541	23.1487	27.9045	29.1931	24.3798	25.929	27.8044	YGL129C
YGL128C	chrVII	269149	270169		42.1936	43.9839	19.0135	20.3631	23.1409	25.7391	25.1405	21.6555	23.1325	22.5264	YGL128C
YGL127C	chrVII	270242	270840		64.2644	77.1716	31.0056	34.7909	40.5519	43.6622	43.9483	33.8062	37.5807	41.0584	YGL127C
YGL126W	chrVII	270960	272395		32.6109	37.4434	11.0706	13.9169	21.1472	25.4294	22.4179	17.637	15.5103	18.4623	YGL126W
YGL125W	chrVII	272377	274719		56.7375	58.1702	20.9568	19.6811	27.4849	30.0497	27.2732	24.5023	24.5973	26.088	YGL125W
YGL124C	chrVII	274763	276748		31.1445	32.692	13.1955	13.7047	13.6813	14.2081	14.8818	15.1558	14.3159	15.2043	YGL124C
YGL123W	chrVII	277518	278469	2_RPG	819.532	344.426	443.518	176.545	450.956	175.793	124.108	417.128	262.984	168.48	YGL123W
YGL122C	chrVII	278695	280568		196.729	200.308	92.4359	96.7609	85.8979	104.82	96.0689	84.693	94.5547	87.1491	YGL122C
YGL121C	chrVII	280743	281277		80.13	85.8218	27.7833	33.4835	43.2722	50.72	46.3012	42.3234	43.9273	49.2806	YGL121C
YGL120C	chrVII	281498	284002	1_RiBi	98.6781	103.931	65.2938	76.9565	45.7898	48.8773	50.7048	51.1177	52.3296	55.5511	YGL120C
YGL119W	chrVII	284389	286080		31.7801	35.2895	17.0326	19.2144	15.38	18.1786	18.9765	17.5098	17.7354	19.8978	YGL119W
YGL117W	chrVII	288394	289421		76.3415	80.7175	36.183	38.7459	40.5005	37.6271	38.7956	42.588	43.4909	44.0652	YGL117W
YGL116W	chrVII	289667	291746		65.3525	64.7921	32.5485	34.6304	27.322	29.2353	32.4648	30.2472	31.5382	33.02	YGL116W
YGL115W	chrVII	291884	293083		81.1461	87.8952	36.4782	40.1366	39.0507	42.168	44.3758	39.7537	41.7533	44.0413	YGL115W
YGL114W	chrVII	293205	295701		45.9433	50.5031	22.911	25.8926	22.0436	24.7611	24.4579	22.3474	22.1717	23.8358	YGL114W
YGL113W	chrVII	295895	298160		40.7841	39.3345	21.9358	20.2607	17.9529	20.2059	19.0695	19.0046	20.9546	19.0984	YGL113W
YGL112C	chrVII	298032	299762		55.6839	54.1714	28.7141	29.6863	25.2313	29.0461	29.4054	26.6331	29.1373	27.3796	YGL112C
YGL111W	chrVII	299924	301521	1_RiBi	92.0547	86.8044	55.7138	60.2007	38.9987	47.2873	45.5172	43.1951	48.1274	45.0833	YGL111W
YGL108C	chrVII	303527	304165		90.748	99.9165	41.6588	43.1027	49.3465	43.3344	45.7046	48.2727	48.2317	51.2687	YGL108C
YGL107C	chrVII	304239	306331		60.0993	58.5807	28.475	28.6283	27.9733	34.6798	33.319	29.3306	30.1009	29.4067	YGL107C
YGL106W	chrVII	306495	307258		115.881	113.746	57.4982	53.6008	66.0387	64.1264	59.8264	58.7889	59.9097	61.7882	YGL106W
YGL105W	chrVII	307371	308669	1_RiBi	194.081	195.56	108.321	111.648	86.8976	89.2191	91.9848	87.6663	89.1383	93.2116	YGL105W
YGL104C	chrVII	308549	310188		26.7936	29.5784	10.5766	12.7017	11.205	14.62	16.468	12.2184	11.7902	13.6202	YGL104C
YGL103W	chrVII	310929	312009	2_RPG	1593.39	739.509	864.208	406.17	853.855	334.483	241.416	727.988	623.814	393.211	YGL103W
YGL101W	chrVII	312142	313092		145.941	164.46	66.0458	78.0707	69.6015	69.2119	75.4818	76.5158	77.8327	88.2925	YGL101W
YGL100W	chrVII	313196	314373		53.3489	56.0333	25.318	27.7374	26.5525	29.7077	30.2676	26.4379	29.5872	30.9263	YGL100W
YGL099W	chrVII	314563	316596		74.6089	72.5938	43.9647	49.0252	32.4953	35.5435	34.6694	36.7643	37.7288	37.1493	YGL099W
YGL098W	chrVII	317283	318660		40.5336	48.9464	21.126	24.3633	20.8473	23.5319	24.4983	21.2465	21.2662	25.0277	YGL098W
YGL097W	chrVII	321715	323361		83.1009	82.711	46.3994	45.6894	41.0207	43.3782	39.6017	42.4491	40.9416	40.0548	YGL097W
YGL096W	chrVII	325285	326280		16.8609	25.7139	8.14367	10.8524	9.05116	20.3166	20.7273	9.12313	12.8334	14.3259	YGL096W
YGL095C	chrVII	328780	330684		32.6575	35.5627	15.2521	17.8399	15.3411	23.1309	22.0229	15.9104	18.9532	18.406	YGL095C
YGL094C	chrVII	330931	334653		51.3567	52.3245	26.6421	27.7658	23.0921	30.9339	29.5615	24.7555	26.9492	25.8076	YGL094C
YGL093W	chrVII	334827	337678		44.8647	50.5776	24.3097	26.724	23.5825	29.8913	29.3224	23.2264	25.2727	26.0025	YGL093W
YGL092W	chrVII	337770	341881		88.583	87.1436	47.8078	50.417	37.8628	40.9934	42.2451	40.1852	41.5319	40.8158	YGL092W
YGL091C	chrVII	341897	343109		50.6323	55.1471	23.9231	27.4432	25.731	34.876	29.1457	24.9841	28.5648	28.6168	YGL091C
YGL090W	chrVII	343277	344676		67.4733	60.7992	38.9636	36.9816	20.579	24.364	25.3985	21.7936	20.2476	22.9747	YGL090W
YGL087C	chrVII	346289	346963		280.418	304.348	129.341	128.231	131.631	172.884	169.01	139.04	143.057	155.445	YGL087C
YGL086W	chrVII	347118	349454		63.4689	63.8084	37.4609	42.7512	28.53	37.9749	39.1891	32.5508	36.2938	35.042	YGL086W
YGL085W	chrVII	349557	350668		44.9578	47.6206	22.6658	23.4627	21.1656	26.6211	25.0559	21.3975	24.4842	24.3693	YGL085W
YGL084C	chrVII	350526	352357		39.2479	45.6116	19.2566	19.5136	19.296	25.095	26.8353	19.995	21.6411	22.7171	YGL084C
YGL083W	chrVII	352944	355597		45.238	47.9575	21.2027	21.7607	21.9298	29.3072	29.6087	21.9569	25.515	25.6372	YGL083W
YGL082W	chrVII	355736	357133		48.2536	55.2398	18.7148	19.7909	21.397	27.0321	28.6069	21.059	25.0755	24.5265	YGL082W
YGL080W	chrVII	358555	359296		65.9837	65.7052	30.2946	33.0693	33.2642	37.3156	40.5884	34.7564	35.5044	39.317	YGL080W
YGL079W	chrVII	359401	360243		58.6414	57.7536	32.7403	34.3967	29.5548	34.8898	33.134	32.7034	34.9936	33.0571	YGL079W
YGL078C	chrVII	360098	361941		159.693	156.026	112.919	121.891	75.12	92.696	88.5696	83.704	86.4822	86.9161	YGL078C
YGL077C	chrVII	362133	364086		145.204	165.243	70.4387	80.9082	65.4558	81.5658	78.8509	67.7144	73.8787	75.3032	YGL077C
YGL076C	chrVII	364225	366025	2_RPG	431.575	196.922	254.305	111.888	207.771	96.1035	80.4656	223.73	147.059	101.585	YGL076C
YGL075C	chrVII	366569	368286		132.166	117.123	63.1484	56.5784	78.8464	78.0219	67.9952	83.0272	75.2769	76.2744	YGL075C
YGL073W	chrVII	368445	371313		89.3647	92.8142	41.4481	43.2455	47.2865	61.5377	51.6993	47.6994	50.8377	46.5225	YGL073W
YGL071W	chrVII	371549	374328		105.033	115.104	49.5042	50.0427	43.9574	46.6013	48.1013	50.3683	48.0121	49.5229	YGL071W
YGL070C	chrVII	374126	374863		135.488	150.523	72.2148	73.8491	68.4358	75.7137	81.9863	70.3319	75.5238	81.8224	YGL070C
YGL068W	chrVII	375039	375781		109.664	123.131	51.1593	58.5508	58.2885	69.885	65.9225	57.9335	57.9237	62.5949	YGL068W
YGL067W	chrVII	375993	377280		61.9975	64.5007	29.5045	31.0667	29.8908	37.5084	34.0146	31.0692	35.0679	34.2006	YGL067W
YGL066W	chrVII	377417	379812		53.8544	55.7133	25.1416	27.2369	22.2081	30.7228	30.0138	23.3082	23.8684	23.8772	YGL066W
YGL065C	chrVII	379705	381326		51.0389	52.4387	24.9813	26.2645	22.2686	27.942	27.2624	24.5798	26.7477	26.0462	YGL065C
YGL064C	chrVII	381468	383219		42.2192	45.3089	19.3569	22.0274	18.6546	24.8648	22.37	19.1896	20.6006	22.0056	YGL064C
YGL063W	chrVII	383422	384885		44.503	47.4489	22.9474	24.5572	26.5845	32.862	28.2669	24.2768	23.1531	24.2199	YGL063W
YGL061C	chrVII	388868	389783		48.9353	53.9296	25.6536	28.8754	22.1357	24.4699	26.5704	23.4751	23.9862	26.1411	YGL061C
YGL060W	chrVII	389934	392038		33.2459	33.4015	14.6206	15.8742	13.5811	19.4763	17.878	14.7178	16.2149	15.561	YGL060W
YGL058W	chrVII	393889	394726		108.971	112.54	56.3696	63.7181	55.213	65.5362	65.1859	52.3343	58.2957	58.8421	YGL058W
YGL057C	chrVII	394805	395835		44.3514	47.8007	23.1189	22.8594	22.1602	28.3643	25.7432	23.1909	26.335	24.9266	YGL057C
YGL056C	chrVII	395944	397715		118.718	127.548	66.5875	72.2156	57.0793	67.8293	64.1304	59.6925	59.8726	61.1938	YGL056C
YGL055W	chrVII	398280	400385		288.376	456.906	230.7	356.387	283.764	193.405	258.208	285.131	169.553	277.488	YGL055W
YGL054C	chrVII	400287	401367		152.238	168.554	83.4881	86.9505	81.1146	78.659	89.4827	87.3555	81.3495	97.4919	YGL054C
YGL053W	chrVII	402486	403469		33.5917	43.771	16.266	17.7107	16.1364	23.7411	26.8491	15.3105	19.1212	21.6119	YGL053W
YGL051W	chrVII	403677	404855		29.2557	30.7254	14.2004	15.566	16.3599	19.1555	17.3583	15.2883	15.9596	16.8179	YGL051W
YGL050W	chrVII	405731	406736		57.9614	61.3014	27.4659	28.4898	29.3042	38.7356	36.338	28.7843	30.7539	31.1975	YGL050W
YGL049C	chrVII	406473	409777		49.0944	56.6617	24.4234	29.5384	20.741	32.8257	31.8601	21.9133	24.6568	26.0457	YGL049C
YGL048C	chrVII	409972	411313		112.168	110.629	57.3524	52.1518	55.1065	82.7244	67.3886	57.84	69.7685	56.7656	YGL048C
YGL047W	chrVII	411464	412203		98.2834	92.6601	41.3959	35.2348	61.3705	78.9054	65.5917	58.9128	64.2478	58.4884	YGL047W
YGL045W	chrVII	413763	415931	3_MSN2	35.5408	37.9263	16.6511	16.2868	17.359	23.7009	24.7312	17.1253	17.1936	20.3686	YGL045W
YGL044C	chrVII	415864	417260		50.6259	56.0783	24.614	30.4755	22.0773	33.0876	33.9396	24.1316	27.4294	27.0304	YGL044C
YGL043W	chrVII	417460	418620		88.8733	94.2425	47.2665	51.1357	45.1032	50.6701	48.2224	44.9368	46.8688	46.038	YGL043W
YGL041W-A	chrVII	418764	419411		72.8294	86.171	33.847	36.8396	38.6161	41.9484	44.5197	36.8277	40.1917	43.8831	YGL041W-A
YGL040C	chrVII	419321	420708		94.4309	103.835	41.7221	45.5913	48.7782	58.3514	52.9058	46.7956	48.366	53.0638	YGL040C
YGL039W	chrVII	423819	425130		58.2344	62.9996	24.7584	27.9683	25.047	34.6639	29.4372	27.0545	31.6962	30.1606	YGL039W
YGL038C	chrVII	425073	426848		76.8571	87.6869	35.1549	39.3637	39.6019	50.4889	46.9201	37.8127	41.7164	40.6607	YGL038C
YGL037C	chrVII	427155	428066		78.7213	117.327	28.5002	31.1867	57.3685	163.183	126.713	46.121	65.0848	64.6905	YGL037C
YGL036W	chrVII	428559	431443		43.3113	53.3018	17.188	21.006	16.4675	26.284	30.5096	17.6999	20.5443	22.6895	YGL036W
YGL035C	chrVII	431292	433176		71.589	80.1926	34.5978	38.8066	39.7039	51.822	46.0741	37.5586	39.8587	41.0398	YGL035C
YGL031C	chrVII	437401	438397	2_RPG	543.785	171.089	339.396	104.465	300.531	96.0392	64.3242	309.223	178.245	99.9058	YGL031C
YGL030W	chrVII	438944	439738	2_RPG	1011.57	445.144	586.175	256.966	595.032	221.093	169.566	574.235	378.975	260.577	YGL030W
YGL029W	chrVII	439995	440658	1_RiBi	146.215	142.041	91.2583	100.926	68.3298	65.0819	70.7608	77.6511	75.4861	80.542	YGL029W
YGL028C	chrVII	440980	443391		320.072	347.37	209.401	219.01	243.864	229.845	282.897	240.265	202.585	241.556	YGL028C
YGL027C	chrVII	443548	446173		48.7112	57.6918	23.9637	26.637	26.4628	30.5963	30.0224	25.9081	25.1346	27.0576	YGL027C
YGL026C	chrVII	446329	448578		77.5635	82.1486	37.7132	40.8227	38.5128	43.2027	38.3835	37.6196	39.6089	36.4568	YGL026C
YGL025C	chrVII	448706	449994		55.5836	58.8556	27.9461	30.5629	31.9831	35.6453	33.3552	29.2309	31.3824	29.5832	YGL025C
YGL023C	chrVII	450068	452152		41.978	44.6628	23.2407	23.696	22.6739	28.3435	26.16	21.328	20.1278	21.8075	YGL023C
YGL022W	chrVII	452309	454733		87.4103	93.7789	40.7661	44.0315	44.2233	52.8529	52.056	42.6132	42.4869	44.2657	YGL022W
YGL021W	chrVII	454784	457171		88.123	99.9989	39.6627	48.727	37.7145	38.2357	48.5742	40.9371	39.5628	49.0611	YGL021W
YGL020C	chrVII	457082	457933		69.4698	73.5516	34.5372	38.0424	34.3468	34.3485	36.1217	34.3606	34.3801	35.2533	YGL020C
YGL019W	chrVII	458060	459102		85.284	90.3629	45.9421	47.4431	43.6893	47.9614	45.7717	40.4881	42.0251	44.8787	YGL019W
YGL018C	chrVII	458778	459698		51.7748	58.6139	27.4815	28.884	25.3474	30.8728	30.1307	25.1936	27.8465	28.7398	YGL018C
YGL017W	chrVII	459826	461453		40.6972	45.063	20.0664	23.2027	20.7526	26.1493	25.6472	20.375	22.8196	21.9814	YGL017W
YGL016W	chrVII	461596	465119		38.6798	39.4637	18.5191	18.9384	15.795	24.4296	23.8692	17.968	20.299	19.5387	YGL016W
YGL014W	chrVII	465727	468903		88.5072	93.2145	49.3228	55.5534	40.0304	46.6543	48.6632	43.8837	44.752	44.601	YGL014W
YGL013C	chrVII	469053	472432		63.4814	62.1183	31.3903	30.8916	28.8732	39.3789	33.3272	29.708	31.2368	27.3303	YGL013C
YGL012W	chrVII	472805	474373		74.9728	90.0374	30.6121	36.8162	38.0764	55.2824	49.1114	36.96	42.7372	40.6081	YGL012W
YGL011C	chrVII	474360	475282		154.883	151.583	76.1334	70.1098	78.7868	103.659	88.9712	76.7911	86.4404	74.3776	YGL011C
YGL010W	chrVII	475475	476242		103.785	103.437	34.6518	31.4512	45.2722	64.9867	53.0843	45.4474	59.2505	46.2856	YGL010W
YGL009C	chrVII	476169	478730		346.548	346.646	84.9049	82.0734	92.3352	94.3195	90.7791	98.1422	104.726	99.2514	YGL009C
YGL008C	chrVII	479394	482901		1261.55	1386.82	804.623	858.228	865.846	387.966	479.34	701.006	681.448	768.905	YGL008C
YGL006W	chrVII	485453	489577		31.2167	40.4008	14.1785	16.5185	15.4379	22.1587	23.7316	16.1104	20.1297	21.2	YGL006W
YGL005C	chrVII	489492	490575		43.8157	49.2595	22.3709	24.9914	21.146	27.4523	28.5184	23.0965	24.0583	25.3767	YGL005C
YGL004C	chrVII	490740	491978		41.2838	45.5769	20.7857	21.2575	22.8454	29.88	26.8907	22.6686	24.0177	24.2439	YGL004C
YGL003C	chrVII	492325	494276		57.1067	58.6165	31.5487	29.8367	29.2115	33.2629	30.1928	29.9311	30.9524	27.7807	YGL003C
YGL002W	chrVII	494405	495340		61.9424	68.0145	29.1986	29.9	30.8793	31.4291	32.9105	33.9052	34.9961	35.7801	YGL002W
YGL001C	chrVII	495328	496610		81.4054	87.5311	37.4806	44.3378	33.1013	31.145	34.234	35.7749	35.7304	41.0518	YGL001C
YGR001C	chrVII	497064	498051		97.8871	107.2	59.2548	69.3821	49.8775	44.0339	49.8829	54.14	54.4311	60.6994	YGR001C
YGR002C	chrVII	498228	499914		65.8124	71.4135	34.4004	35.0978	31.1575	30.8867	32.9226	31.4679	33.1542	35.2453	YGR002C
YGR003W	chrVII	500103	502612		42.4113	41.1563	22.7845	23.0267	18.2845	22.37	20.9981	20.9099	21.4581	20.0712	YGR003W
YGR004W	chrVII	502909	504574		34.8703	38.5656	17.2389	19.2213	16.8497	16.6095	17.6886	17.9789	18.6025	19.6293	YGR004W
YGR005C	chrVII	504552	505888		55.6951	62.3388	29.6293	34.0014	27.4326	30.6769	30.4792	29.0887	28.146	31.8449	YGR005C
YGR007W	chrVII	506922	508081		92.5568	103.692	48.7237	46.0418	45.9112	47.6664	46.0816	44.7097	46.675	46.3534	YGR007W
YGR008C	chrVII	507971	508544		56.9102	82.982	18.4305	21.5295	36.0318	41.6186	53.3113	28.8836	32.2418	49.9477	YGR008C
YGR009C	chrVII	508993	511072		54.2043	60.3354	34.1927	35.7703	27.9026	40.9568	37.476	28.9833	31.4835	30.1535	YGR009C
YGR010W	chrVII	511421	513004		56.6807	58.9288	26.7052	26.8799	29.0401	30.3833	27.9989	28.2941	29.8788	29.4969	YGR010W
YGR012W	chrVII	513129	514373		43.3917	49.6171	21.2572	24.4562	24.4048	25.4748	24.021	23.1878	22.9291	25.8395	YGR012W
YGR013W	chrVII	514530	516684		59.5414	68.2796	33.3928	37.691	37.1852	34.1245	31.6394	35.7935	32.0292	35.91	YGR013W
YGR014W	chrVII	516667	520991		121.848	139.281	67.9404	80.6798	62.6766	50.0755	52.2351	61.6969	58.5153	62.8655	YGR014W
YGR015C	chrVII	520982	522094		52.8801	57.1144	24.5305	25.5573	27.2032	32.3528	27.5507	28.726	29.0808	30.6275	YGR015C
YGR016W	chrVII	522237	522989		43.8264	47.7715	23.6848	25.0187	24.7773	27.9569	25.3131	25.0395	25.8702	27.5646	YGR016W
YGR017W	chrVII	523532	524795		106.846	112.663	65.5251	63.467	58.4922	66.2248	58.706	61.2751	59.4858	55.6536	YGR017W
YGR019W	chrVII	525190	526737		61.0994	83.6638	23.56	29.4231	35.4432	46.9023	48.5261	32.6946	36.6922	45.3953	YGR019W
YGR020C	chrVII	526838	527441		133.446	143.317	56.0232	62.6922	64.4594	71.9616	73.9196	67.2172	72.6515	76.2117	YGR020C
YGR021W	chrVII	527583	528583		52.257	60.7888	22.9193	28.9385	31.678	37.2832	35.4677	27.5247	29.6214	30.8087	YGR021W
YGR023W	chrVII	529106	531172	3_MSN2	34.8425	44.316	18.3615	22.1694	18.4147	28.9545	27.7402	18.0783	19.7646	22.881	YGR023W
YGR024C	chrVII	531800	532649		71.595	74.3417	39.9102	39.8639	37.7015	39.7141	41.4823	37.0403	40.4687	43.5826	YGR024C
YGR026W	chrVII	532805	534080		72.5537	74.6933	35.1743	33.8454	34.1755	39.3719	42.4891	35.8221	37.2192	39.2863	YGR026W
YGR027C	chrVII	534068	534785	2_RPG	239.4	131.252	130.423	71.007	119.95	74.0505	64.3408	125.769	95.7647	77.6654	YGR027C
YGR028W	chrVII	542039	543439		31.2954	37.2787	13.9542	15.8132	16.6474	18.0039	21.7294	16.7098	16.7193	20.2075	YGR028W
YGR029W	chrVII	543528	544301		44.9805	52.5076	19.892	23.084	22.416	27.2445	30.5236	21.7719	25.8511	27.3594	YGR029W
YGR030C	chrVII	545432	546170		291.401	261.108	148.467	137.928	143.598	137.833	141.397	156.736	154.74	148.212	YGR030C
YGR031W	chrVII	546354	547779		52.4972	62.0267	27.5084	29.3063	37.7838	47.5511	37.7514	32.1245	32.8451	32.5635	YGR031W
[truncated: 3,046 more rows]
