# Supplementary material for: A ribosome assembly stress response regulates transcription to maintain proteome homeostasis
Source: eLife. 2019 May 24;8:e45002. doi: 10.7554/eLife.45002 (PMC6579557; doi:10.7554/eLife.45002)
Supplement: Supplementary file 5. [file elife-45002-supp5.xlsx]

## Sheet: Feuil1
Supplementary File 5
Rpb1 ChIP-seq in Top1-AID or Top1/2-AID cells following either auxin, auxin plus cycloheximide, or vehicle addition to the media. Category (cat): Hsf1 genes (Hsf1), Ribosome Biogenesis genes (RiBi), Msn2/4 genes (Msn2), Ribosomal Protein Genes (RPG) Postion of each ORF in the chromosome is indicated (Chr, Start, End).
#chr	start	end	cat	TOP1-AID VEH	TOP1-AID AUX	TOP1-AID AUXCHX	TOP1-AID CHX	TOP1-2-AID VEH	TOP1-2-AID AUX	TOP1-2-AID AUXCHX	TOP1-2-AID CHX	name
chrI	1788	2191		0.6495	0.789181	0.836253	0.685707	0.504169	2.27189	0.895533	0.899082	YAL068C
chrI	11698	14645		14.37	25.0558	17.7583	17.5413	15.981	35.2597	16.3318	15.3556	YAL064C-A
chrI	21341	21981		2.893	6.17177	3.77073	3.71787	2.8405	11.2743	5.67166	3.56989	YAL064W
chrI	23940	28043		9.49	15.7036	10.3988	11.382	10.836	18.5457	9.70817	9.9692	YAL063C
chrI	31187	33041		20.74	23.7486	12.2527	15.2361	25.5231	36.794	24.3039	20.0303	YAL062W
chrI	33222	34864		23.68	37.2752	25.7939	32.1134	37.6631	49.7419	26.6878	24.8327	YAL061W
chrI	35056	36421		41.27	62.6842	52.0135	66.1343	44.4234	63.0844	46.2511	47.1017	YAL060W
chrI	36508	37275		50.57	61.1204	31.2923	37.6659	38.9605	46.7916	47.0832	36.6627	YAL059W
chrI	37379	39106		13.39	17.6126	15.5573	16.6389	11.9207	17.1816	14.0663	12.867	YAL058W
chrI	39204	42030		22.62	28.5712	24.605	23.3599	22.2669	36.2853	26.9174	21.9074	YAL056W
chrI	42154	42862		13.43	19.9875	12.7554	15.5904	17.3203	26.1821	13.1647	12.145	YAL055W
chrI	45743	48316		26.35	36.1811	78.3097	62.814	23.1291	42.8273	39.5328	36.0187	YAL053W
chrI	48538	51858		19.09	22.1129	28.4224	24.6061	16.7135	28.8921	28.0541	25.4569	YAL051W
chrI	51739	52660		23.22	31.8037	37.3031	34.6822	24.2198	44.1294	50.2395	39.3285	YAL049C
chrI	52729	54798		15.18	19.5407	22.0064	20.5117	15.9766	26.7443	23.6886	20.0553	YAL048C
chrI	54925	56885		12.36	13.4426	12.8146	13.3438	11.2559	17.8552	14.1885	13.1237	YAL047C
chrI	56919	57390		22.13	29.8986	23.029	30.4079	26.8459	33.4036	27.624	25.1276	YAL046C
chrI	57480	57963		18.69	28.0948	28.3231	31.4293	24.9857	36.7331	25.2614	22.2413	YAL044W-A
chrI	57867	58475		21.98	45.4656	59.6163	59.7501	30.8324	47.6706	33.0225	30.5648	YAL044C
chrI	58632	61092		31.58	40.263	36.9811	37.2642	29.3034	47.0102	26.4506	25.7765	YAL043C
chrI	61268	62656		36.53	48.1399	31.9935	33.7118	40.4654	57.0148	25.7402	24.7561	YAL042W
chrI	62775	65464		34.92	37.944	41.7908	38.8434	31.598	62.2042	33.8514	34.7849	YAL041W
chrI	65381	67849		99.73	90.6664	82.7579	77.8751	113.244	88.5989	107.091	99.3492	YAL040C
chrI	68648	69599		40.7	60.1124	65.4777	63.0768	45.8788	77.4426	52.3082	52.367	YAL039C
chrI	71643	73454		697.5	606.343	663.072	579.117	528.479	291.97	445.272	481.563	YAL038W
chrI	73838	74859		10.22	12.792	14.9171	12.5661	8.11917	22.0215	12.1836	10.8858	YAL037W
chrI	74852	76198		53.42	59.4342	43.2874	44.3901	41.7494	47.4407	39.3096	39.1731	YAL036C
chrI	76400	79562	1_RiBi	88.78	106.284	103.316	88.4281	78.1995	106.335	90.8666	85.9182	YAL035W
chrI	79673	80669		22.24	26.7152	19.1749	18.5082	24.0006	29.6514	17.7905	16.4847	YAL034W-A
chrI	80566	82584	3_MSN2	21.39	26.0115	24.3768	24.6705	23.7558	38.8937	23.131	22.4177	YAL034C
chrI	82684	83301		32.64	34.9778	19.5429	24.6829	32.7954	33.4159	26.7402	23.645	YAL033W
chrI	83276	84506		27.66	35.8987	23.6145	25.0945	27.4961	38.3682	22.3241	22.3535	YAL032C
chrI	84639	87077		16.47	21.5719	25.1703	23.645	18.3877	29.9154	21.599	19.9559	YAL031C
chrI	87249	87857		20.44	24.4068	27.0313	29.8546	25.8642	42.0166	29.0607	27.4421	YAL030W
chrI	87756	92523		30.05	36.4937	30.8469	27.6143	24.4089	40.2283	32.2545	26.7868	YAL029C
chrI	92848	94539		8.348	10.9606	28.6596	28.6552	9.88766	24.0145	22.5954	23.5484	YAL028W
chrI	94606	95579		18.55	22.6257	21.2072	23.0926	20.4453	25.114	21.4951	21.8879	YAL027W
chrI	95481	99782		15.25	19.3284	23.3462	19.882	14.1445	21.3017	20.816	20.3788	YAL026C
chrI	100037	101173	1_RiBi	84.28	108.947	78.5627	73.7704	62.6521	67.3147	69.9332	69.4428	YAL025C
chrI	101279	105965		20.36	21.2069	17.5123	16.6502	16.2563	14.7368	16.498	16.1236	YAL024C
chrI	106141	108695		67.94	67.5327	46.2884	45.0214	65.8667	56.9077	31.793	33.8506	YAL023C
chrI	108876	110462		18.82	20.6885	25.2744	30.3046	19.8545	13.4085	18.8871	24.199	YAL022C
chrI	110631	113419		31.18	36.5038	28.3824	30.2112	31.0509	25.9013	22.6099	24.9361	YAL021C
chrI	113535	114629		25.67	32.8149	18.6639	25.5068	31.7971	21.5056	14.9951	16.7006	YAL020C
chrI	114808	118365		33.42	37.6405	25.652	25.0172	24.4472	22.462	24.9182	24.3273	YAL019W
chrI	119857	124484		12.54	18.0085	15.7303	17.4962	16.1426	22.6979	17.55	15.876	YAL017W
chrI	124781	126856		42.5	47.9293	40.9089	41.4385	43.3612	50.0279	41.7599	39.2645	YAL016W
chrI	126769	128102		16.61	22.4886	24.6763	24.0345	17.1465	21.4251	20.2456	19.2483	YAL015C
chrI	128086	129071		35.66	50.2119	38.8598	41.0627	42.1279	44.599	35.3756	34.8101	YAL014C
chrI	129209	130589		36.11	50.0028	33.0376	36.3305	45.463	48.0537	29.2691	30.2477	YAL013W
chrI	130734	132084		127.5	148.157	69.9743	59.4601	122.261	130.499	52.4641	49.2664	YAL012W
chrI	132184	134174		24.66	32.2697	22.8762	22.7976	21.1163	31.3147	24.4597	21.4101	YAL011W
chrI	134086	135705		17.54	21.9185	20.0092	19.7373	17.1742	25.6847	29.8652	25.4966	YAL010C
chrI	135828	136758		17.56	23.8424	16.4617	20.4344	21.7499	29.0051	32.4477	23.9682	YAL009W
chrI	136834	137644		14.55	19.6351	12.4605	15.9904	21.6303	32.5281	26.1946	20.1788	YAL008W
chrI	137546	138452		46.85	49.0306	21.9916	23.0926	53.1939	49.1035	32.8244	25.3722	YAL007C
chrI	139355	141660	4_HSF1	297.1	602.113	38.3465	34.4989	414.725	418.022	37.0497	40.1578	YAL005C
chrI	142116	143370	1_RiBi	562	482.223	285.218	271.298	476.888	241.934	321.291	323.897	YAL003W
chrI	143615	147587		15.22	16.2716	14.8137	14.0318	14.0812	12.8021	17.085	13.0137	YAL002W
chrI	147560	151202		19.49	23.0239	14.2417	13.7257	21.1071	16.9838	15.73	13.1033	YAL001C
chrI	152214	153976		37.74	45.8989	33.0253	33.5699	32.3459	52.7826	33.5041	28.1748	YAR002W
chrI	153932	154827		49.4	52.066	25.7141	29.812	50.3488	51.7629	36.4432	31.4091	YAR002C-A
chrI	154919	156781		23.7	27.0459	18.2552	18.0095	23.1085	39.3588	18.3368	14.6822	YAR003W
chrI	156679	158688		33.15	39.4895	11.3375	10.1444	32.5703	56.4243	13.8873	9.46483	YAR007C
chrI	158846	159881		28.68	29.4037	11.6107	10.4996	28.2042	38.2114	14.7246	11.5036	YAR008W
chrI	166567	169020		32.24	41.3954	27.7493	27.0153	28.1705	36.7882	27.8053	23.8494	YAR014C
chrI	169223	170392		19.64	31.2546	24.1336	26.6206	28.5012	22.6747	25.106	19.5757	YAR015W
chrI	170262	171737		20.87	23.2711	11.291	19.939	22.9493	20.9304	29.2721	23.9115	YAR018C
chrI	172135	175167		11.43	15.7534	13.9605	14.9972	11.9273	14.7619	13.5056	11.6825	YAR019C
chrI	176662	177189		5.195	8.85281	12.2078	13.6659	5.23283	10.7273	11.0721	13.8425	YAR020C
chrI	183698	184655		21.83	25.0299	27.1142	28.6833	21.7926	24.1187	34.8197	30.236	YAR027W
chrI	184812	185793		14.66	15.9238	23.0102	24.0465	13.5063	14.5084	26.2901	22.1531	YAR028W
chrI	188048	188963		17.02	20.5416	13.1311	18.3853	17.6566	22.4966	18.7064	16.0288	YAR033W
chrI	190138	192572		3.998	6.85208	47.8517	22.408	6.87088	7.56535	9.21909	9.2235	YAR035W
chrI	192564	196350		27.44	34.0877	27.6535	28.2893	27.2941	27.7174	24.9433	22.7805	YAR042W
chrI	203375	208127		9.471	15.0156	11.6375	12.5907	10.5444	15.4867	10.2463	11.5162	YAR050W
chrI	225158	226914		45.05	18.6237	43.5117	16.7951	12.8246	22.2516	18.4841	19.2407	YAR071W
chrII	7622	7982		0.08447	0.147083	0.398611	0.342694	0.124361	0.422222	0.361167	0.284972	YBL108C-A
chrII	9818	10551		40.88	53.6605	29.8562	28.1797	38.2406	39.8143	26.5078	26.9202	YBL107C
chrII	10719	13945		11.93	18.0158	18.0785	16.4879	9.61691	21.2335	16.4137	15.6534	YBL106C
chrII	13988	17964		28.94	31.8565	33.392	29.633	25.0278	31.3491	30.903	29.9263	YBL105C
chrII	18146	21315		20.43	21.2125	22.9058	22.3783	16.7182	18.3284	18.1819	19.3259	YBL104C
chrII	21619	23801		24.16	24.2785	30.8433	28.724	24.316	26.297	25.0291	28.3429	YBL103C
chrII	23979	24894		25.08	30.7921	27.5716	33.856	32.4685	32.9513	27.5018	29.7092	YBL102W
chrII	24779	28605		14.77	27.0819	20.5404	20.2648	18.6295	29.4176	13.7251	15.4929	YBL101C
chrII	36735	38964	3_MSN2	77.3	87.7672	44.1905	47.4351	120.519	90.9139	44.001	42.8169	YBL099W
chrII	39114	40626		8.153	10.245	24.6824	23.1898	10.3293	12.279	19.6754	24.9549	YBL098W
chrII	40772	43100		28.75	34.3968	29.1753	31.0323	29.8904	30.6886	34.0949	32.1274	YBL097W
chrII	43260	44209		29.85	38.9875	98.9573	81.3219	30.9655	46.0582	95.9335	93.5486	YBL095W
chrII	44105	45016		35.11	37.6883	63.989	58.9127	33.4811	51.722	67.5506	65.1746	YBL093C
chrII	45514	46440	2_RPG	517.6	168.794	644.216	652.861	493.701	61.852	556.409	597.058	YBL092W
chrII	46494	47192		64.02	35.4394	79.805	78.191	58.0522	28.1869	63.1132	81.8919	YBL091C-A
chrII	47272	48694		26.79	29.629	34.8793	35.2035	28.6238	38.0427	32.6693	32.0803	YBL091C
chrII	48793	49478		39.76	36.7754	32.5396	34.9707	41.5687	37.8272	41.0164	37.9065	YBL090W
chrII	49557	51025		18.77	22.4015	22.2413	23.591	19.1905	23.6401	24.2134	20.1306	YBL089W
chrII	50930	59654		15.19	15.074	21.4971	20.0681	13.2995	13.7298	19.9217	18.8227	YBL088C
chrII	59721	60821	2_RPG	252.1	94.304	314.64	296.275	236.447	61.7687	260.29	308.189	YBL087C
chrII	61159	62682		16.91	20.3675	24.4296	26.8429	17.8527	38.6985	26.2794	25.5006	YBL086C
chrII	63684	66936		29.33	31.8164	21.8902	20.916	26.8367	27.6489	21.1063	19.6472	YBL085W
chrII	67042	69568		19.14	23.9	20.4222	20.1045	18.8915	25.9207	22.5396	19.4112	YBL084C
chrII	69657	71172		21.54	27.2906	16.1507	20.7598	17.9199	20.5622	13.3728	15.2891	YBL082C
chrII	71551	73031		55.68	60.4872	67.2174	58.1035	47.9845	38.887	46.7134	51.367	YBL081W
chrII	72984	74710		14.01	15.4837	12.0481	13.1521	12.9842	19.2345	13.1135	11.6709	YBL080C
chrII	75195	80047		35.06	37.1685	33.0026	31.0797	27.9269	34.1409	36.4994	30.4874	YBL079W
chrII	79893	80790		13.52	18.7193	18.8512	21.6767	17.2186	25.3325	23.5172	24.1165	YBL078C
chrII	80951	84306	1_RiBi	92.17	89.575	115.63	100.754	82.3191	75.5671	98.2451	106.677	YBL076C
chrII	88414	89500	2_RPG	381.8	136.043	466.924	478.245	361.446	90.5314	381.099	411.566	YBL072C
chrII	89942	90474		65.89	55.4046	74.8508	96.8115	53.7931	45.076	66.9523	76.5232	YBL071W-A
chrII	90630	92172		32.46	26.7645	43.7186	46.6668	21.8527	26.3664	31.7772	37.9034	YBL069W
chrII	92335	93524		36.88	32.5071	42.3872	39.3997	26.0258	24.7983	36.395	37.0348	YBL068W
chrII	93550	96168		22.94	26.3792	19.2947	20.4775	15.669	39.1488	23.218	23.5572	YBL067C
chrII	96338	100155		24.79	29.693	33.1098	30.3009	25.4946	38.7868	21.9278	25.9986	YBL066C
chrII	100298	101223		16.43	25.2289	16.6726	25.315	30.6753	62.3081	18.2018	25.0052	YBL064C
chrII	101868	105325		14.27	20.8577	12.056	12.3614	14.3132	23.0139	9.54068	11.0395	YBL063W
chrII	105211	107505		34.1	38.7711	69.3831	61.1579	26.7597	34.0309	37.3204	36.3684	YBL061C
chrII	107894	110041		20.04	26.2595	30.5439	29.7594	14.6819	28.538	19.946	20.2712	YBL060W
chrII	109880	110570		28.03	33.1962	34.3747	36.5218	32.7572	33.3455	30.9416	34.3866	YBL059C-A
chrII	110593	111357		36.01	41.1281	34.1751	39.2506	47.6508	42.4568	26.2035	36.3562	YBL059W
chrII	111395	112826		42.33	67.0033	26.1525	31.1511	44.5435	81.6657	26.3122	26.5019	YBL058W
chrII	112728	113457		30.68	39.9485	27.7917	34.4755	34.6608	44.6542	27.4013	28.6444	YBL057C
chrII	113625	115562		54.52	68.9404	50.0774	51.4186	56.7011	74.7162	50.45	50.4621	YBL056W
chrII	115476	116829		29.96	37.5126	28.9761	30.3388	20.8832	48.1744	24.3943	25.0328	YBL055C
chrII	117473	119361		40.57	50.6249	30.628	39.1848	21.2421	36.3092	25.8549	28.5953	YBL054W
chrII	119304	122140		19.19	22.6529	24.9364	21.4646	18.2364	20.3064	19.5376	18.9693	YBL052C
chrII	122305	124843		35.96	41.2183	48.0434	41.0852	34.58	56.8048	38.6135	39.8552	YBL051C
chrII	125037	126182		31.43	34.0639	32.6458	32.1301	30.6797	53.6291	32.8512	26.2224	YBL050W
chrII	127685	132205		33.49	43.3633	34.6209	33.5681	35.9954	54.6114	29.4755	29.1095	YBL047C
chrII	132402	134043		26.04	30.242	38.5831	29.6148	25.5231	35.7071	24.0886	29.5242	YBL046W
chrII	133813	135701		49.71	67.6184	36.0406	31.6591	73.4378	86.6114	37.281	34.8156	YBL045C
chrII	136488	137611		5.624	10.1402	19.724	13.3503	16.5257	24.3998	19.5395	21.9618	YBL043W
chrII	138076	140348	1_RiBi	62.83	67.0843	26.7868	27.8675	73.1576	45.2493	25.5692	26.7366	YBL042C
chrII	141032	142020		80.35	117.203	32.9076	33.3971	94.5103	139.607	29.9516	31.3344	YBL041W
chrII	142112	142910		52.17	59.2103	37.6628	41.6937	53.0009	74.1071	36.6574	36.9792	YBL040C
chrII	143085	143726		16.19	18.5111	12.7211	13.0988	16.0197	31.5645	16.4901	13.6608	YBL039W-B
chrII	143882	145817	1_RiBi	79.55	96.9192	52.4872	57.9943	54.198	69.9549	53.802	51.8063	YBL039C
chrII	146097	146979		46.1	50.8251	32.1367	35.6697	50.1595	54.1909	35.6542	31.6396	YBL038W
chrII	147110	150427		15.85	20.0478	20.3059	19.4009	13.6912	25.7474	14.8316	17.0912	YBL037W
chrII	150299	151268		34.5	41.1851	44.6325	40.8814	33.1545	47.7776	42.1244	46.4784	YBL036C
chrII	151409	153702		32.02	30.6736	20.2058	17.9193	27.2305	37.1617	15.5813	16.6944	YBL035C
chrII	153847	158450		18.42	19.7415	18.4091	16.1261	16.2218	24.2772	15.8449	15.6932	YBL034C
chrII	158539	159720		42.48	57.8467	34.129	39.5452	50.1132	62.1757	24.3736	28.8278	YBL033C
chrII	160085	161524		32.91	35.604	23.1026	30.7372	28.1247	40.9388	21.1432	26.0943	YBL032W
chrII	161660	162861		26.43	29.3708	17.9828	21.2219	28.3303	39.8226	20.211	22.7603	YBL031W
chrII	162739	164144		118	148.006	106.509	102.501	194.355	208.845	104.353	112.269	YBL030C
chrII	164346	164890		33.22	51.5022	30.4185	33.1161	67.3401	79.4475	27.8272	37.2852	YBL029C-A
chrII	166065	167470		29.12	36.7174	43.2217	48.9561	36.3545	53.1356	56.9319	60.5854	YBL029W
chrII	167233	167895		61.18	61.8139	62.6311	75.2703	56.2759	53.5751	84.8848	96.1087	YBL028C
chrII	168391	169467	2_RPG	369	113.221	513.992	508.169	328.84	49.8804	355.57	456.72	YBL027W
chrII	170551	171166		52.34	52.2192	57.1209	59.8114	59.4786	49.3317	69.0786	62.2804	YBL026W
chrII	171412	172208		28.89	30.2241	31.7611	37.9823	29.0655	28.033	26.702	29.4282	YBL025W
chrII	172471	174664		56.58	54.4137	60.1597	52.5636	45.6786	44.4299	55.5096	53.3709	YBL024W
chrII	174707	177578		20.93	23.6402	21.4704	21.6758	19.608	32.3478	26.0053	22.467	YBL023C
chrII	177796	181407		35.85	57.9583	20.5146	20.2068	36.5216	55.5907	20.9391	19.3826	YBL022C
chrII	181488	182125		35.21	46.251	29.1115	31.7319	40.0201	48.0028	25.5629	25.4735	YBL021C
chrII	182328	184225		23.37	25.1932	21.4013	21.189	19.5947	26.3025	22.8319	19.869	YBL020W
chrII	184300	185960		16.84	20.5064	17.8352	19.5664	15.9201	21.3243	20.1418	18.7163	YBL019W
chrII	185932	186528		37.22	37.5995	20.4479	22.9601	29.869	26.1046	28.0782	25.1614	YBL018C
chrII	186772	191787		28.72	33.1685	34.8628	34.1591	24.9824	24.2793	36.8109	31.0829	YBL017C
chrII	192360	193648		26.47	35.4374	42.4079	45.8792	32.7436	25.1919	36.194	33.3607	YBL016W
chrII	194018	195976	3_MSN2	10.51	16.8194	37.4678	26.8936	18.1813	23.3985	23.2507	21.4604	YBL015W
chrII	198952	201776		28.86	34.9931	21.9715	21.5486	20.5426	27.8779	22.2965	20.5116	YBL014C
chrII	203436	206020		29.77	40.1487	19.6664	23.1661	24.5509	42.3506	28.6855	23.0527	YBL011W
chrII	205930	206983		27.66	34.2411	14.9706	17.4909	29.5427	32.2971	19.8802	16.7875	YBL010C
chrII	207159	209352		29.63	32.5466	13.0342	14.8613	23.0109	23.9276	17.7577	14.5564	YBL009W
chrII	209496	212270		12.65	16.4648	12.3079	13.5611	12.2479	14.5566	13.6419	12.6024	YBL008W
chrII	212546	216420		36.22	37.695	34.0094	35.8184	34.0772	37.5126	29.8618	29.6065	YBL007C
chrII	216412	217159		55.61	69.4873	42.9195	55.4577	71.0986	54.7835	42.213	41.3133	YBL006C
chrII	217398	220591		38.75	54.8382	31.5902	36.3201	27.9709	52.9151	60.1432	41.4664	YBL005W
chrII	227528	235177	1_RiBi	43.53	44.7633	36.6053	34.0967	27.3503	24.0349	47.7882	39.2856	YBL004W
chrII	235219	235855		356.9	312.728	213.485	345.187	333.31	126.851	315.057	327.914	YBL003C
chrII	236363	237145		341.9	264.74	177.683	300.038	357.131	108.895	302.561	338.603	YBL002W
chrII	237086	237572		51.73	48.7448	38.124	51.4248	64.4324	45.6909	49.9551	57.7387	YBL001C
chrII	238763	241446		19.02	24.184	20.53	17.6411	18.0602	36.8059	24.1057	17.9253	YBR001C
chrII	241592	242601		69.19	76.2511	45.1699	47.8676	66.9795	86.1687	58.2098	50.5534	YBR002C
chrII	242774	244351		20.03	26.4252	17.5774	19.4178	20.5565	48.2385	22.7032	17.0231	YBR003W
chrII	244272	245682		26.64	29.5997	41.9816	36.6449	20.6364	31.7471	51.6198	38.8747	YBR004C
chrII	245816	246693		23	33.2453	60.4382	55.5857	27.5413	42.3717	55.5667	52.9269	YBR005W
chrII	246878	248646		17.8	23.4375	18.0067	21.7504	23.223	44.9577	26.2444	19.1408	YBR006W
chrII	248676	251161		26.67	34.3995	29.0979	27.4248	26.9497	44.1444	30.8502	22.3149	YBR007C
chrII	255207	255781		467.4	451.92	300.525	468.699	476.565	211.87	475.218	452.898	YBR009C
chrII	256302	256903		485.8	447.864	340.374	471.149	436.24	238.636	497.599	434.901	YBR010W
chrII	256998	258041		113	117.238	95.2416	89.5814	118.67	107.319	88.001	91.2474	YBR011C
chrII	265157	266235		0.04685	0.222263	0.0970315	0.0527829	0.250139	0.54398	0.161234	0.211809	YBR013C
chrII	266617	267418		26.42	30.1155	21.1076	22.191	28.5232	29.4227	23.5754	22.3716	YBR014C
chrII	267575	269595		40.51	43.2742	44.4645	37.4352	34.9863	43.3416	37.2088	33.1133	YBR015C
chrII	270209	270841		44.57	54.6016	72.5709	62.172	50.3701	74.212	78.8436	73.1814	YBR016W
chrII	270843	273769		32.91	38.9605	41.129	38.0578	27.8395	38.3353	41.0007	34.4577	YBR017C
chrII	281306	283509	1_RiBi	35.86	35.5502	34.957	38.0532	37.3709	26.9669	35.7835	32.6742	YBR021W
chrII	283660	284421		28.16	32.6209	28.0138	31.9218	34.1101	33.1213	33.0645	30.484	YBR022W
chrII	284277	288068		36.64	44.1986	73.3683	61.7628	34.2586	43.8592	44.0498	41.5707	YBR023C
chrII	289327	290567		28.39	31.2276	31.2183	30.3333	25.4206	44.2313	33.0291	33.7847	YBR024W
chrII	290475	292038		145	137.809	126.415	126.716	154.492	160.032	133.426	146.765	YBR025C
chrII	292760	294086		16.96	19.4181	23.7027	28.7424	21.7388	27.8358	26.5747	30.0806	YBR026C
chrII	294280	296101		24.86	29.7228	23.6843	25.9703	24.7628	26.0131	23.1449	25.2788	YBR028C
chrII	296295	297821		50.7	52.3278	24.3821	32.6365	51.6656	54.8869	32.0072	33.4401	YBR029C
chrII	298208	300063		45.36	44.4018	32.5065	38.2327	44.1475	34.1172	38.0534	43.5087	YBR030W
chrII	300141	301349	2_RPG	319.2	297.707	386.889	382.164	275.904	173.089	273.339	298.573	YBR031W
chrII	301887	304762		10.84	22.2978	15.3939	17.9926	10.7496	33.4493	19.3075	15.4879	YBR033W
chrII	304750	306045		76.6	96.669	91.0169	90.9345	60.4081	56.7601	75.1427	72.9399	YBR034C
chrII	306117	306989		55.46	62.3462	56.0257	64.9646	68.7191	66.4176	67.7158	60.4639	YBR035C
chrII	308758	310388		44	50.076	42.6159	42.9701	47.1644	55.5534	42.6207	41.3752	YBR036C
chrII	310496	311500		23.81	27.3521	18.6466	23.0828	27.3402	38.6716	25.2424	23.2845	YBR037C
chrII	311846	314976		33.13	36.49	7.25645	20.6084	30.1183	36.3896	28.7258	21.9398	YBR038W
chrII	315483	316690		53.97	61.1334	29.1941	33.0115	71.7774	68.2906	32.3494	30.4321	YBR039W
chrII	318185	320434		16.87	20.1661	20.4152	17.6794	18.6739	27.2748	19.7157	17.2319	YBR041W
chrII	320375	321671		23.95	25.2548	21.6112	20.3457	23.0606	38.691	24.6409	24.4039	YBR042C
chrII	321757	324093		29.81	33.2865	19.7262	19.1507	25.6615	39.5815	20.5213	18.9962	YBR043C
chrII	324264	326141		22.55	24.999	25.5863	25.1001	30.0951	34.8988	23.907	21.8963	YBR044C
chrII	330467	331583		8.846	7.67664	16.2437	18.0083	12.1814	17.248	15.0704	15.2118	YBR046C
chrII	331823	332426		8.572	7.67065	17.4989	21.2152	12.5145	13.0118	20.1965	17.1801	YBR047W
chrII	332751	334022	2_RPG	280.2	87.9449	375.58	350.88	269.052	48.7137	313.685	378.163	YBR048W
chrII	333993	336966		43.82	47.5712	36.3898	32.7189	38.7103	49.6645	31.5695	32.6909	YBR049C
chrII	338661	339422		25.81	43.2417	21.9429	25.929	44.8609	85.5706	24.7132	24.6796	YBR052C
chrII	339554	340774		13.86	18.664	15.4146	20.0109	22.1395	45.2667	19.0963	17.0597	YBR053C
chrII	342648	344498		19.35	25.5006	15.0115	16.3584	41.3032	65.4984	19.4506	21.9119	YBR054W
chrII	344476	347321		20.07	23.8544	23.0884	22.2942	17.9871	22.9237	24.9057	22.8833	YBR055C
chrII	347808	349422		10.83	14.193	16.1632	19.0623	15.4932	30.9749	21.7678	18.5779	YBR056W
chrII	352070	353402		38.06	39.4612	41.6085	42.3764	38.5946	36.9541	41.352	43.5475	YBR057C
chrII	353549	356038		20.97	24.2428	25.628	25.6318	16.7828	25.5453	22.4559	23.9127	YBR058C
chrII	356151	356644		37.95	28.8684	27.6761	35.254	44.2574	45.9609	42.2775	37.976	YBR058C-A
chrII	356798	360336		25.17	30.8273	23.1232	23.6779	26.9989	43.3454	26.6776	23.0841	YBR059C
chrII	360587	362631		26.92	28.8001	22.1204	24.8269	24.384	36.6425	29.8392	26.3407	YBR060C
chrII	364656	365760	1_RiBi	35.93	42.7779	29.4178	33.1682	29.9915	33.5056	33.127	32.0451	YBR061C
chrII	365870	366600		32.85	46.8531	23.9604	27.8021	36.3471	47.0805	31.3908	27.7243	YBR062C
chrII	369940	370972		42.84	36.219	45.8045	60.0564	33.4135	55.41	69.4758	65.7894	YBR066C
chrII	371982	372934		71.32	72.7117	130.635	154.066	48.0578	172.716	221.637	338.532	YBR067C
chrII	373640	375751		217.6	206.489	76.2898	127.894	233.106	163.235	196.968	174.06	YBR068C
chrII	376406	378537		114.7	119.706	20.4896	34.0561	90.4915	65.5731	46.2541	37.2589	YBR069C
chrII	379159	379986		41.57	40.3748	9.13037	15.7743	40.4981	56.7932	19.0939	15.2161	YBR070C
chrII	380327	381564		88.38	122.319	33.4005	38.5106	138.678	159.635	33.1973	35.8273	YBR071W
chrII	381955	382841		10.85	16.7156	11.2709	17.414	30.1034	108.302	26.8923	38.0187	YBR072W
chrII	383139	386052		30.47	37.8651	35.1804	30.795	29.3601	40.1354	24.863	25.9732	YBR073W
chrII	386280	389333		20.46	23.8158	30.1588	28.1328	17.1962	20.2236	28.1106	26.4818	YBR074W
chrII	391586	392415		54.38	66.5631	73.6532	78.351	79.3485	69.6425	58.4324	60.3309	YBR077C
chrII	392946	395237		210.1	190.643	147.42	156.625	232.211	141.756	192.613	175.611	YBR078W
chrII	395294	398301		100.9	103.356	135.865	112.133	82.2836	71.5543	109.764	113.125	YBR079C
chrII	398439	400931		23.26	26.9303	24.8149	24.9504	22.2802	23.2398	29.8942	24.867	YBR080C
chrII	401138	405396		20.45	23.9908	22.3502	19.3952	18.5589	25.8932	24.9186	21.4848	YBR081C
chrII	406459	407287		111.9	147.982	40.4232	44.9527	129.59	233.637	60.1659	49.78	YBR082C
chrII	409121	410712		40.29	43.6267	41.763	60.6049	51.1993	51.1521	49.8394	52.8301	YBR083W
chrII	410970	414143		49.28	45.7516	51.2344	48.8065	33.1472	27.0592	46.2689	46.3068	YBR084W
chrII	414062	415492	2_RPG	302.1	103.873	381.586	380.72	297.722	53.3328	301.707	376.032	YBR084C-A
chrII	415878	417089		6.684	9.41363	40.3547	31.5455	5.49906	22.6322	35.177	33.1199	YBR085W
chrII	418708	419263		38.17	53.2914	86.9865	102.55	55.7231	110.391	79.3294	70.1877	YBR085C-A
chrII	420077	423357		42.89	48.8467	33.3504	36.667	44.5505	46.791	39.7316	32.2178	YBR086C
chrII	423734	424881		37.06	36.4392	25.889	29.7376	32.8996	33.033	29.9902	27.6542	YBR087W
chrII	424933	425827		74.13	67.9077	60.265	55.9424	90.3174	98.0219	48.344	61.6599	YBR088C
chrII	426013	426911		52.9	56.3927	30.4854	35.0693	62.3604	55.9494	35.1655	33.7354	YBR089C-A
chrII	427064	427524		38.72	47.8074	33.6198	43.6176	43.4232	53.3209	36.406	32.6454	YBR091C
chrII	427652	429129		51.72	55.2179	33.9307	52.0182	70.4086	39.4634	51.4332	47.4943	YBR092C
chrII	429490	430995		52.05	43.2681	43.0192	49.2021	42.3182	41.2478	48.5163	47.0294	YBR093C
chrII	431969	434388		16.2	19.8643	13.496	14.8257	11.4961	19.8806	17.5018	15.25	YBR094W
chrII	434393	435737		31.42	32.6745	26.0946	28.6737	24.9615	34.3207	29.0602	27.4772	YBR095C
chrII	435929	436792		31.75	32.0506	28.7071	28.84	31.2	36.8821	42.2936	36.4815	YBR096W
chrII	436919	441484		10.79	13.5535	14.447	13.9088	10.6746	21.3686	15.0285	15.0171	YBR097W
chrII	441491	443805		19.34	31.781	16.9258	18.0233	17.5666	105.217	16.1137	18.529	YBR098W
chrII	443779	444764	4_HSF1	111.7	183.713	36.3994	37.2286	127.997	358.762	35.0915	36.3873	YBR101C
chrII	444714	447400		25.42	35.1563	28.0107	27.7743	32.0877	55.9306	30.4807	34.6781	YBR102C
chrII	447542	449365		25.02	29.3718	33.2256	33.4408	28.3932	22.4894	33.8996	40.0895	YBR103W
chrII	449546	450790		37.69	38.3939	40.7588	41.9862	32.0047	28.6338	44.5182	42.641	YBR104W
chrII	450763	452037		15.81	28.5183	23.0357	22.3703	21.4579	38.6485	18.8552	18.9803	YBR105C
chrII	452618	453365		150.6	163.352	72.6573	79.4884	138.731	117.677	90.1616	91.1588	YBR106W
chrII	453251	454584		42.62	44.8338	30.1075	28.5696	42.2919	49.5846	41.3153	40.4712	YBR107C
chrII	454806	457809		11.78	18.1708	15.4972	15.7223	14.3785	27.8918	12.2196	12.5377	YBR108W
chrII	457723	458447		64.02	64.054	62.0304	58.8531	67.8359	68.1928	60.5917	56.0719	YBR109C
chrII	458656	460331		19.35	20.9098	31.9803	29.5906	22.0762	24.0099	25.5097	26.8999	YBR110W
chrII	461102	461873		23.72	30.4895	21.8581	27.0403	34.5578	45.0307	31.5628	28.6353	YBR111C
chrII	462097	462743		27	25.0921	21.7945	26.3486	36.1514	33.3966	39.7414	36.0517	YBR111W-A
chrII	462698	465971		59.39	67.4346	73.7003	70.1832	61.937	62.5643	52.4389	57.1033	YBR112C
chrII	467145	469710		12.93	24.5038	18.2231	19.0447	14.6963	29.3326	18.3027	16.6315	YBR114W
chrII	469697	474042		33.88	34.0467	48.6521	41.7521	35.6941	37.2916	42.545	42.1778	YBR115C
chrII	474262	476477	3_MSN2	15.88	16.7177	19.0384	20.3623	21.8424	27.2326	21.21	24.8863	YBR117C
chrII	477648	479138		797.8	662.53	1015.53	966.399	406.408	329.406	420.862	374.321	YBR118W
chrII	479228	480469		31.14	29.5831	29.6258	34.7522	29.5448	25.564	32.6595	32.3828	YBR119W
chrII	480368	480992		27.8	28.8825	21.5324	25.2144	29.5	30.0735	32.6037	26.0398	YBR120C
chrII	481260	483459	1_RiBi	74.37	67.0921	74.0295	63.8494	62.3879	49.0141	70.3233	67.4665	YBR121C
chrII	483772	484551		61.44	60.5754	44.3073	45.6727	67.4908	61.8011	52.9933	46.8352	YBR122C
chrII	484683	486758		22.17	24.9744	17.9096	16.2585	20.4188	25.0822	21.1707	17.1283	YBR123C
chrII	486959	488567		20.14	24.7205	11.7932	13.2177	17.5598	26.1697	15.7804	14.5917	YBR125C
chrII	488773	490498		28.01	38.351	34.4521	58.8427	52.2843	91.5801	47.2763	46.0881	YBR126C
chrII	491101	492889		53.21	55.2479	63.2311	67.8479	57.8749	62.7302	66.7256	62.1416	YBR127C
chrII	492958	494119		22.19	23.6797	21.608	24.5119	31.8501	28.3087	28.3903	27.0778	YBR128C
chrII	494262	495387		22.85	24.4922	18.5064	18.8092	21.8254	24.1378	24.7651	22.6406	YBR129C
chrII	495478	496937		39.83	41.8715	31.1089	27.9039	40.8667	49.1728	39.6848	32.9192	YBR130C
chrII	497118	499359		14.62	16.1618	19.8097	17.9304	12.3357	17.1088	20.3357	19.5816	YBR131W
chrII	499347	501593		7.632	14.9757	14.5484	18.5258	13.3348	24.4962	21.1191	18.0067	YBR132C
chrII	501682	504434		19.15	21.6182	17.7723	21.2073	18.4332	21.8294	22.5889	17.6238	YBR133C
chrII	504744	505516		31.4	35.4868	20.1807	30.1128	36.9486	35.7084	23.8061	22.8831	YBR135W
chrII	505633	512906		9.222	11.3692	14.2634	15.0272	7.40353	13.1302	15.6004	13.9749	YBR136W
chrII	512907	513720		21.42	26.5089	20.581	26.3254	28.9492	31.8272	31.182	29.7052	YBR137W
chrII	513611	515408		14.45	18.2275	8.69922	12.8733	17.2776	25.4411	21.1016	15.8901	YBR138C
chrII	515652	517361		15.89	21.2223	13.8323	19.7378	25.8793	41.361	21.8016	17.8237	YBR139W
chrII	517248	526917		17.96	25.2341	23.6348	21.5124	16.0477	25.2458	21.8409	21.4511	YBR140C
chrII	526942	528070		30.07	37.429	23.4255	25.7133	30.915	31.4452	23.3462	24.8016	YBR141C
chrII	528240	530816		32.55	35.5105	27.7302	26.7814	19.8307	25.9638	30.1513	29.1545	YBR142W
chrII	530730	532270		100.2	92.9716	97.6985	89.1479	99.2177	91.348	109.525	102.573	YBR143C
chrII	533705	534927		16.67	15.2181	23.9811	24.1735	17.2505	18.5131	14.2968	20.0634	YBR145W
chrII	535170	536300		35.26	35.989	42.3909	42.5733	38.357	38.6841	39.2827	38.5424	YBR146W
chrII	539910	541124		26.35	30.3686	40.0485	39.2494	39.2111	58.3751	43.4775	42.3929	YBR149W
chrII	541199	544523		20.99	26.6273	41.9815	27.3691	17.9102	40.1141	28.795	28.7092	YBR150C
chrII	544865	546112		57.92	54.5093	70.8519	71.1158	63.7659	82.4903	89.8176	89.9241	YBR151W
chrII	548264	549131	1_RiBi	93.61	90.6843	88.9746	78.708	85.1051	79.232	104.888	92.803	YBR154C
chrII	549673	551020		30.58	39.6784	23.417	23.2723	22.9375	42.3812	21.4646	20.7018	YBR155W
chrII	550924	553254		18.94	22.066	29.8148	23.7588	15.6472	61.3505	18.4994	16.8763	YBR156C
chrII	556285	558348		135.6	113.853	100.757	100.382	169.859	151.852	176.979	171.395	YBR158W
chrII	558620	559816		32.14	34.5301	39.617	36.2991	37.2077	41.2576	36.0875	36.3442	YBR159W
chrII	559999	561070		37.92	44.5449	49.4956	45.1398	42.0261	54.9085	37.6827	38.4131	YBR160W
chrII	561406	563080		22.38	24.8441	18.7896	22.8461	27.8602	55.4614	31.1584	26.5968	YBR161W
chrII	562925	564807		105	100.662	105.546	103.095	94.6656	96.8125	102.733	97.048	YBR162C
chrII	565167	565517		94	90.1208	91.6568	87.7611	107.872	106.947	85.494	77.9949	YBR162W-A
chrII	565607	567793		25.02	28.8854	28.407	25.7163	22.449	61.986	30.7134	29.1894	YBR163W
chrII	567753	568566		36.03	40.2649	35.599	35.5128	44.2369	54.5241	43.3471	39.3956	YBR164C
chrII	568759	569731		29.39	33.5334	33.6823	31.2564	29.092	35.3869	31.7822	32.1609	YBR165W
chrII	569728	571242		25.03	29.2074	40.9645	34.3866	23.8261	33.3223	28.9597	29.0916	YBR166C
chrII	571400	572139		35.48	38.4737	46.442	50.0128	48.5721	55.0264	49.1526	48.8035	YBR167C
chrII	572054	573810		12.42	15.0158	18.5671	20.0801	14.8125	35.0706	18.6598	20.6059	YBR168W
chrII	573744	576029		7.689	18.9097	22.7953	23.2335	12.7995	91.4915	17.2025	21.4722	YBR169C
chrII	576209	578135		26.27	44.7374	17.3265	18.3538	27.82	69.0208	17.7983	16.2802	YBR170C
chrII	578314	579139		47.95	44.3348	34.3919	30.7401	41.6376	48.1179	39.433	35.843	YBR171W
chrII	579048	581490		67.33	72.8348	96.8233	84.5143	62.6446	65.9639	73.4077	82.7153	YBR172C
chrII	581659	582214		64.32	95.6187	58.2884	57.9971	92.3264	113.121	45.0065	49.7462	YBR173C
chrII	582384	583467		27.83	35.9471	30.4897	34.5007	29.9986	45.6152	27.6175	30.423	YBR175W
chrII	583601	584804		17.43	22.8174	17.5454	21.4378	17.7982	35.5092	20.6816	21.0225	YBR176W
chrII	584645	586234		30.32	28.9238	38.6278	41.3791	36.9334	55.961	50.0424	43.0075	YBR177C
chrII	586490	589178		18.4	21.3791	24.2994	23.6863	16.3009	26.5441	24.6011	23.7077	YBR179C
chrII	591608	592838	2_RPG	326.2	108.361	379.921	361.212	296.072	52.1312	309.147	343.933	YBR181C
chrII	593230	595017		10.85	9.63812	77.6341	48.5236	8.53922	16.6441	35.8979	40.5541	YBR182C
chrII	595982	597172		9.156	11.8483	69.8935	64.8177	23.0883	50.9148	94.7025	84.4912	YBR183W
chrII	597289	598975		6.935	6.92516	11.987	12.1254	6.60874	8.57302	11.5881	13.2774	YBR184W
chrII	599080	600010		21.45	25.3004	23.6691	25.5137	23.0025	26.2485	27.2312	25.9312	YBR185C
chrII	602499	603637		60.31	48.4671	63.1328	64.8734	50.2149	51.0939	47.7351	56.2097	YBR187W
chrII	603610	604205		25.07	23.7075	29.9016	37.104	30.2011	24.8962	24.8198	27.2234	YBR188C
chrII	604453	605579	2_RPG	420.9	134.734	598.514	534.202	383.788	61.851	500.741	542.255	YBR189W
chrII	606247	607270	2_RPG	316.8	108.243	404.116	384.314	300.822	50.3887	326.848	372.616	YBR191W
chrII	607488	609057		30.75	27.7447	37.9841	35.0876	26.5975	37.4364	41.1155	37.134	YBR192W
chrII	608620	609812		29.88	31.1351	32.1263	32.1393	32.9839	42.368	36.8108	35.8154	YBR193C
chrII	609896	610620		24.73	27.1662	23.812	29.1075	32.0736	33.6405	39.2276	32.6511	YBR194W
chrII	610488	611927		24.28	28.1573	23.7519	27.2792	29.7846	26.7366	32.6605	29.0051	YBR195C
chrII	612070	614007		205	191.88	295.588	251.287	183.022	123.081	189.308	215.556	YBR196C
chrII	614793	615890		68.02	73.8244	61.9091	68.2914	69.1624	57.5991	55.4627	54.0045	YBR197C
chrII	616053	618600		36.27	49.8315	41.4122	39.9501	32.2254	54.8048	38.8406	33.91	YBR198C
chrII	618809	620433		33.11	36.6321	34.391	36.1423	38.4003	51.4035	45.0486	34.705	YBR199W
chrII	620808	622784		17.32	18.7523	19.6628	18.094	15.7127	22.3164	24.2687	18.6145	YBR200W
chrII	623425	624337		15.58	15.8589	14.1024	16.2486	18.3792	22.2176	20.0987	17.7161	YBR201W
chrII	624299	624739		5.589	7.65995	19.5716	18.3511	7.22382	17.4109	46.1365	34.8945	YBR201C-A
chrII	625706	628459		34.07	34.3407	35.6518	36.3071	34.9773	38.7603	42.8698	37.5611	YBR202W
chrII	628972	631961		8.602	14.5681	20.0959	18.1245	11.6007	25.3449	17.4417	15.4523	YBR203W
chrII	631997	633448		10.84	12.4961	10.7646	12.0275	13.1321	23.5611	13.221	12.0214	YBR204C
chrII	633574	635016		27.73	31.9768	20.9153	20.6716	30.7055	32.261	20.8419	18.594	YBR205W
chrII	635056	636662		35.94	37.1594	30.5944	25.819	36.0319	38.2239	25.8223	24.4033	YBR207W
chrII	636576	642305		18.91	22.8771	19.2553	20.4977	18.0681	25.9232	24.8654	22.1398	YBR208C
chrII	645327	646194		21.25	18.403	21.2139	22.1312	21.5404	21.7669	28.8303	25.117	YBR210W
chrII	646045	647244		22.57	24.1376	30.3099	28.7709	21.6407	29.2412	26.6569	30.7796	YBR211C
chrII	647437	650112		17.56	23.9134	22.9892	22.9539	17.9305	35.0473	16.5923	18.4036	YBR212W
chrII	651335	653190		14.4	20.0442	15.8221	21.5789	21.1009	54.6323	18.5302	19.5089	YBR214W
chrII	653314	655435		24.3	28.8845	27.3577	26.0291	21.8277	36.38	25.8061	28.1164	YBR215W
chrII	655302	657632		18.12	22.2785	22.8615	23.7736	18.4145	26.6506	23.3507	24.9718	YBR216C
chrII	657767	658614		21.64	24.8807	22.9944	25.1087	22.7631	25.7796	23.1796	24.1781	YBR217W
chrII	658593	662391		30.98	39.1234	76.136	68.5106	33.731	38.7399	41.8191	42.9007	YBR218C
chrII	662868	664758		17.46	18.1952	22.6093	21.7055	16.1209	16.3212	13.3181	16.5762	YBR220C
chrII	664912	666486		38.43	42.0489	51.0134	49.1914	40.6386	42.7645	40.6666	40.8198	YBR221C
chrII	666604	668392		17.63	21.7562	46.9964	44.9393	18.4823	23.7121	24.9828	33.207	YBR222C
chrII	668402	670325		13.84	14.4081	15.364	17.4646	15.2114	16.7722	13.0685	14.8728	YBR223C
chrII	670473	673479		13.8	16.5245	14.6467	16.2968	13.6503	21.3252	14.4655	13.6188	YBR225W
chrII	673462	675191		19.19	21.3764	20.595	20.1383	18.3329	21.8978	20.2532	20.4274	YBR227C
chrII	675312	676341		23.45	26.542	30.6417	27.6224	22.7512	23.7867	25.1534	26.339	YBR228W
chrII	676225	679247		13.54	19.6757	15.6139	15.6835	14.3282	29.2651	14.1655	12.7357	YBR229C
chrII	679384	680106		20.73	28.8878	22.1162	24.7324	38.4827	47.2109	18.6968	22.9757	YBR230C
chrII	680283	680696		103.6	146.38	90.8704	88.5816	102.049	110.925	62.9035	80.2582	YBR230W-A
chrII	682138	683146		32.32	56.6589	25.1875	28.5085	31.5244	47.5154	16.8773	19.9076	YBR231C
chrII	683348	684830		19.14	21.4094	16.1683	16.9607	17.6086	25.9054	17.2983	16.3694	YBR233W
chrII	684933	685497		19.26	24.3345	22.6052	22.5945	22.7837	28.4826	20.3104	19.8171	YBR233W-A
chrII	685396	686637		29.34	35.3433	24.0632	24.6234	30.7997	47.138	21.9917	20.2395	YBR234C
chrII	686819	690355		12.23	19.419	14.1903	14.0155	12.4507	27.653	14.7989	12.8111	YBR235W
chrII	690241	691742		26.37	31.6444	29.9096	27.2315	25.1618	34.8254	29.7024	26.6567	YBR236C
chrII	691912	694682		15.11	17.7977	21.6151	18.7355	13.9301	19.2561	20.0286	16.8412	YBR237W
chrII	694605	697374		26.76	38.3812	28.1911	25.3679	19.9343	39.8773	38.889	29.4426	YBR238C
chrII	698289	700091		28.25	35.1185	42.9413	39.314	25.5978	36.4188	45.6243	40.3161	YBR239C
chrII	700483	702033		5.189	7.05377	19.1234	18.1191	8.32244	8.93265	17.0155	17.0689	YBR240C
chrII	702534	704083		4.837	8.68847	9.94815	12.5325	7.46725	11.068	8.75645	8.43499	YBR241C
chrII	704501	705454		44.83	49.7854	77.4354	59.9326	44.9473	39.2718	92.1499	77.5706	YBR242W
chrII	705238	706849		20.72	25.6822	18.6875	16.6355	17.8801	27.6732	18.2247	15.6849	YBR243C
chrII	707347	708138		23.25	25.2352	19.6443	20.949	19.7703	22.5868	27.0827	24.5376	YBR244W
chrII	708040	711539		29.82	32.4485	24.0122	21.1796	26.4436	24.9406	23.7058	21.9585	YBR245C
chrII	711518	712883		30.41	34.0228	24.8138	24.9182	33.6486	28.8903	26.3419	25.1987	YBR246W
chrII	712885	714536	1_RiBi	50.01	58.8874	37.7111	38.461	33.8551	33.9703	39.0948	37.2327	YBR247C
chrII	714720	716560		47.65	50.6586	50.5259	47.7147	41.7085	39.7651	43.6005	40.9819	YBR248C
chrII	716769	718129		78.34	56.8367	66.5574	66.3452	73.0122	34.9778	62.1469	72.031	YBR249C
chrII	721321	722431		29.89	34.0684	25.5179	29.4482	32.7071	33.557	27.8135	28.5516	YBR251W
chrII	722566	723129		49.31	50.965	34.2761	43.2503	56.0064	40.8296	33.077	35.0036	YBR252W
chrII	723208	723728		36.28	39.244	31.1085	34.1762	41.7786	33.385	34.2005	30.8065	YBR253W
chrII	723572	724279		30.95	30.5872	22.4383	25.901	29.3289	26.3125	27.3398	25.5687	YBR254C
chrII	724415	726641		15.72	20.2013	16.6655	17.1775	16.0388	26.3724	19.8027	19.1617	YBR255W
chrII	726518	727114		39.67	48.9085	24.5118	26.0375	43.6962	44.8638	23.4155	25.3837	YBR255C-A
chrII	727330	728109		38.6	41.685	33.0208	33.6064	73.3158	63.8989	39.8657	36.9873	YBR256C
chrII	728853	729866		26.55	32.4096	27.778	26.8387	22.5452	26.0475	25.24	22.9107	YBR257W
chrII	729670	730194		24.1	27.9934	36.4382	37.9112	29.086	27.2935	32.4349	27.1039	YBR258C
chrII	730326	732596		13.34	15.655	16.9741	16.8363	11.7755	20.4	14.8913	13.9535	YBR259W
chrII	732533	734675		19.9	25.362	19.3977	18.5426	18.0796	29.8755	21.6184	21.4269	YBR260C
chrII	734715	735572		32.24	38.4935	26.3209	29.3968	36.0315	34.3384	25.088	26.0298	YBR261C
chrII	735634	736086		48.65	55.8824	42.4543	55.9018	62.4778	57.3296	52.008	49.1179	YBR262C
chrII	736178	737793		36.82	46.9772	38.2905	37.1974	29.7926	46.6142	32.5225	33.5485	YBR263W
chrII	737734	738406		27.58	28.4231	20.3738	24.7157	29.7756	33.6463	22.8439	21.3094	YBR264C
chrII	738497	739678		45.57	50.3908	31.5363	39.1784	39.7482	36.7818	30.7038	33.1484	YBR265W
chrII	739823	741132	1_RiBi	59.4	70.4817	51.8312	54.9001	44.338	38.622	43.6812	48.1109	YBR267W
chrII	741268	741726		29.15	31.4625	22.0764	29.2313	39.738	34.2752	26.7883	25.6562	YBR268W
chrII	742000	742596		18.71	23.5252	12.874	17.9615	23.5929	26.4218	18.0609	15.0533	YBR269C
chrII	742694	744669		12.78	16.5003	10.0071	10.9369	14.1518	17.8513	11.6986	10.7708	YBR270C
chrII	744811	746262		22.72	25.1255	16.7467	16.8714	14.3968	21.5916	16.2713	16.3538	YBR271W
chrII	746177	747849		14.43	19.0336	20.3082	19.6636	14.2574	20.6938	18.5674	15.6389	YBR272C
chrII	747962	749401		18.29	22.8576	18.8987	20.8908	17.8866	25.4222	18.3539	17.9401	YBR273C
chrII	749531	751371		12.31	14.1146	11.4615	11.8281	11.3929	16.0173	13.6734	11.8491	YBR274W
chrII	751239	757179		16.85	18.72	14.4057	12.7185	14.0008	21.3421	12.3273	11.9309	YBR275C
chrII	757542	760139		15.92	17.7989	16.5879	16.0694	13.9942	20.207	12.8139	11.6732	YBR276C
chrII	760246	760992		25.05	29.1898	15.0828	17.3116	27.6208	33.109	16.9599	16.2692	YBR278W
chrII	761209	762739		37.16	40.2612	32.2729	31.3904	35.9559	46.1036	30.3055	28.1308	YBR279W
chrII	762678	764725		9.215	12.9599	13.6856	14.7473	12.0843	28.1982	12.6143	13.883	YBR280C
chrII	764840	767654		18.62	18.0063	17.5007	14.3282	14.1601	22.1653	12.7629	13.126	YBR281C
chrII	768192	768773		38.12	39.2988	42.2619	41.3546	46.3326	45.9704	38.8917	35.8405	YBR282W
chrII	768778	770636		63.62	69.2125	96.811	80.2002	63.9051	67.9624	71.7421	85.6871	YBR283C
chrII	770868	773737		5.242	10.301	13.7609	12.0428	6.8666	20.959	10.6402	11.4586	YBR284W
chrII	773813	774428		5.062	8.14751	4.35748	6.14101	5.97257	14.7649	7.99093	6.4806	YBR285W
chrII	774686	776381	3_MSN2	49.39	55.2739	68.7313	68.5868	44.233	69.2363	65.1467	70.049	YBR286W
chrII	776537	777966		38.58	42.9996	57.6308	48.2594	38.3084	57.2758	57.8703	53.0928	YBR287W
chrII	777813	779520		24.91	26.5156	43.0529	35.3465	23.1792	31.0354	30.0205	30.0018	YBR288C
chrII	779604	782442		24.26	30.6778	21.1915	20.2129	24.7904	30.0849	17.1844	17.8993	YBR289W
chrII	782549	783658		36.41	41.7608	47.3464	43.8343	42.41	52.7285	46.6318	41.71	YBR290W
chrII	783626	784607		27.23	33.1478	30.0158	31.1504	26.329	42.955	30.8758	30.2841	YBR291C
chrII	787005	788647		21.64	25.3767	20.3552	20.8441	22.0867	27.2836	21.4356	20.9981	YBR293W
chrII	792779	796655		15.2	18.7243	46.4598	34.4843	13.7008	19.2068	19.418	20.7285	YBR295W
chrII	796531	798600		5.285	3.86928	13.8083	5.2207	2.88518	5.33844	5.05516	5.09434	YBR296C
chrII	800458	802174		6.657	12.5565	5.68973	6.20813	8.85486	19.4702	7.15583	5.58297	YBR297W
chrII	802537	804900	3_MSN2	13.22	18.3639	4.68008	5.97637	15.7513	43.7547	8.35179	6.53649	YBR298C
chrII	805262	807180		16.92	19.7616	12.4489	15.0493	17.9697	26.5124	19.5794	16.0075	YBR299W
chrII	809006	809466		2.739	3.73828	2.82539	3.21165	1.65054	9.13437	3.15809	2.6702	YBR301W
chrII	810262	811501		5.189	6.18636	6.23525	5.51516	5.17279	10.3691	6.90161	5.55974	YBR302C
chrIII	9284	11173		6.951	8.26698	10.9341	10.9038	6.27043	9.17088	8.98984	9.71577	YCL069W
chrIII	12365	13029		15.64	16.7579	13.4877	15.3056	31.4422	31.016	41.5404	37.4781	YCL067C
chrIII	15414	16939		37	50.6891	301.508	286.953	54.1975	46.5468	326.527	306.929	YCL064C
chrIII	17238	18612		38.64	46.2262	28.6707	35.2592	38.7307	54.8716	41.8771	35.9089	YCL063W
chrIII	18672	22171		25.43	25.5656	17.82	18.0731	22.5003	32.2682	22.5887	18.6436	YCL061C
chrIII	22322	23443	1_RiBi	52.45	61.0276	28.6584	34.2753	42.521	42.612	44.7291	35.6222	YCL059C
chrIII	23532	23991		66.31	89.6405	44.4471	54.6063	59.9361	58.9352	62.4842	51.4593	YCL058W-A
chrIII	23903	24386		60.17	77.1092	41.9819	52.2164	79.4077	75.5896	50.2058	46.8118	YCL057C-A
chrIII	24732	27033		27.34	47.1246	16.2893	17.0302	30.3894	59.8997	20.0924	15.7862	YCL057W
chrIII	26908	27651		29.03	36.1017	34.5684	37.2227	32.8997	40.2742	46.4175	37.5188	YCL056C
chrIII	27913	29020		77.64	68.2333	50.4398	50.3546	25.6137	31.6862	34.2151	31.3056	YCL055W
chrIII	31396	34045	1_RiBi	62.24	74.8694	51.8225	49.108	36.9487	57.4923	57.2792	50.4535	YCL054W
chrIII	33972	35462		21.71	26.5436	20.2927	22.4667	22.2273	39.9819	28.3276	22.4949	YCL052C
chrIII	35555	37658		22.92	29.0568	25.6372	24.6895	26.3184	39.359	25.0624	21.7774	YCL051W
chrIII	37719	38862		56.82	66.0378	35.7742	34.305	55.5163	126.29	38.8481	36.8116	YCL050C
chrIII	39588	40796		17.39	26.7563	29.886	32.1598	22.5985	41.1998	26.322	20.6855	YCL049C
chrIII	43571	44465		15.81	19.9871	12.5768	12.1347	17.2741	22.3066	15.1816	12.9684	YCL047C
chrIII	44562	46969		30.25	33.4924	28.2703	26.715	24.5697	35.333	29.9072	24.6387	YCL045C
chrIII	47000	48440		39.52	54.6562	20.9067	22.3473	42.2622	54.395	22.2968	20.1834	YCL044C
chrIII	48555	50257		119.1	162.589	47.5536	45.9536	105.665	132.133	44.5484	42.1052	YCL043C
chrIII	50780	52520		11.37	27.4491	8.62502	20.3877	44.5233	133.283	15.5983	14.4895	YCL040W
chrIII	52624	54948		18.34	25.2645	18.1352	20.4199	19.7077	28.6013	22.965	18.5008	YCL039W
chrIII	54813	56625		9.392	13.4103	15.7974	18.1836	9.39504	23.9581	28.8055	20.7437	YCL038C
chrIII	56743	58744	1_RiBi	139.8	111.447	199.01	185.123	115.533	78.1277	139.174	168.174	YCL037C
chrIII	58971	60815		51.91	64.5856	58.1316	74.9131	41.6561	47.9254	77.7072	84.2605	YCL036W
chrIII	60724	61236		34.16	46.0689	33.6261	41.4486	40.8796	64.7662	49.9752	44.6377	YCL035C
chrIII	61601	62732		26.44	36.0138	20.3875	24.3267	32.6037	48.468	21.0778	17.6968	YCL034W
chrIII	62698	63292		12.11	18.8779	12.6819	17.6807	17.4659	27.5004	15.8407	12.6762	YCL033C
chrIII	63363	64583		22.09	27.503	26.2348	27.1762	21.894	30.1223	24.8023	21.0608	YCL032W
chrIII	64571	65618	1_RiBi	77.53	78.8609	70.6655	71.2893	76.1903	78.4432	84.9204	75.0988	YCL031C
chrIII	65805	68392		54.26	33.8286	55.8167	34.3457	96.5115	34.6478	51.1692	44.1378	YCL030C
chrIII	68436	69980		54.88	45.6849	34.7756	25.8467	91.7769	42.6102	37.104	37.2564	YCL029C
chrIII	70066	71441		26.24	30.0873	23.9491	24.8188	29.2832	33.1234	18.5787	19.6761	YCL028W
chrIII	73342	74020		5.455	8.17049	9.73181	8.31858	8.08808	12.5999	4.00689	5.70161	YCL026C-B
chrIII	75940	78022		81.43	63.4285	16.9564	22.1249	116.411	71.1235	49.4666	42.2633	YCL025C
chrIII	79089	82340		16.61	16.6052	6.64123	6.73491	17.0712	19.9641	7.96088	6.14932	YCL024W
chrIII	91158	92564		72.94	70.8702	30.8026	42.188	90.0838	75.7349	73.1809	65.1814	YCL018W
chrIII	92621	94396		26.92	32.8346	27.0595	29.6446	24.1573	38.2859	27.4193	24.9186	YCL017C
chrIII	94528	95794		22.37	25.5779	23.9475	23.9097	21.2402	25.7359	23.197	20.1897	YCL016C
chrIII	96177	101266		20.18	27.1252	14.0356	16.0287	18.724	29.4201	27.2353	17.4516	YCL014W
chrIII	101188	101871		20.34	27.2615	15.5683	23.9924	22.6577	40.4892	38.5705	22.5519	YCL012C
chrIII	104537	105580		62.85	70.0062	48.7262	54.5957	71.9639	54.9576	35.095	40.5656	YCL009C
chrIII	105562	106863		38.28	45.055	24.3498	30.4955	55.5354	40.7081	24.5308	25.9976	YCL008C
chrIII	106997	107521		167.7	177.421	74.0856	83.9184	159.913	125.589	109.224	93.3395	YCL005W-A
chrIII	107966	108929		34.65	40.3433	24.7195	29.9352	33.4903	35.6374	25.0253	22.0687	YCL005W
chrIII	109026	110709		20.8	26.2502	15.5027	15.8671	20.1146	26.8368	20.326	15.6425	YCL004W
chrIII	110548	111711		35.27	39.8107	19.7063	18.788	31.8216	36.5362	29.7502	21.9676	YCL002C
chrIII	111837	112530		44.33	42.3643	21.7433	22.53	55.5316	42.0603	34.687	26.6763	YCL001W
chrIII	117303	118402		39.64	42.883	36.1154	32.1023	38.0783	46.6538	41.878	33.3606	YCR002C
chrIII	118597	119263		35.92	41.0816	37.5559	38.8959	42.2468	53.1449	52.0232	43.4557	YCR003W
chrIII	119476	120559		25.75	37.5869	23.1382	30.3946	43.0782	60.8902	41.1809	31.096	YCR004C
chrIII	128026	130558		32.66	37.4622	29.406	28.2502	25.5417	38.4023	32.6733	28.3512	YCR008W
chrIII	130641	131622		45.66	47.2912	33.3511	34.2742	41.7189	58.6468	43.4058	35.0041	YCR009C
chrIII	133665	137076		25.94	31.9933	21.2754	19.4204	25.2971	40.0522	25.9252	19.3292	YCR011C
chrIII	137663	139163		580.5	655.164	275.841	245.507	557.088	487.582	176.012	171.16	YCR012W
chrIII	141141	142545		73.26	62.4092	47.479	49.0034	72.584	44.916	72.574	60.9356	YCR015C
chrIII	143603	144664		44.62	51.8003	27.7123	31.2718	34.3693	32.9802	40.3666	36.5545	YCR016W
chrIII	144569	147700		21.07	26.648	23.8354	23.9286	19.4215	46.4835	24.6336	21.5172	YCR017C
chrIII	152688	154044		14.62	16.5521	14.0158	14.9257	14.452	20.0302	16.535	13.1156	YCR019W
chrIII	153934	154699		12.01	16.1132	13.2936	14.7106	8.21639	21.4359	17.9315	16.068	YCR020C
chrIII	154665	155113		27.45	27.5589	20.542	24.4284	28.0408	30.0292	28.1757	24.9562	YCR020C-A
chrIII	155261	156052		43.59	45.1319	27.678	31.2351	42.749	49.8618	41.0188	39.2861	YCR020W-B
chrIII	155942	157221		14.28	20.2782	15.555	18.6511	16.6435	49.0456	23.3335	22.25	YCR021C
chrIII	158282	160472		29.48	34.2436	26.8495	25.2686	29.6132	50.3278	30.9909	25.4191	YCR023C
chrIII	160655	162240		19.34	23.1777	26.3016	22.4565	19.5939	29.5299	22.5746	20.3919	YCR024C
chrIII	162406	163301		333.3	241.5	182.597	217.412	338.803	169.42	264.067	272.625	YCR024C-A
chrIII	162418	163301		337	244.122	184.517	219.946	342.768	171.251	266.635	275.446	YCR024C-B
chrIII	163869	166424		34.65	39.6715	37.0112	33.8676	30.339	37.8585	28.2825	28.7995	YCR026C
chrIII	166806	168207		21.27	23.344	17.0799	16.2821	22.412	21.7769	19.8511	17.6384	YCR027C
chrIII	170158	172541		24.3	26.5196	30.6006	29.2984	18.9714	34.3161	29.1434	28.9675	YCR028C
chrIII	172756	173526		46.78	41.3823	26.8585	30.1659	49.4846	39.7635	41.5653	35.0709	YCR028C-A
chrIII	173666	176536		23.3	27.7811	24.7444	29.2918	25.2126	38.1484	28.3313	24.3107	YCR030C
chrIII	177397	178255	2_RPG	412.9	155.838	472.76	476.423	372.752	84.1513	385.986	441.494	YCR031C
chrIII	179452	186155		12.45	14.1682	19.494	20.8553	11.4965	18.8186	19.8511	19.6022	YCR032W
chrIII	186266	190277		42.39	51.195	42.7321	38.8949	38.9179	44.9115	35.9056	38.3782	YCR033W
chrIII	190565	191804		65.19	59.1061	50.6281	51.354	53.6788	45.5752	43.0723	52.0652	YCR034W
chrIII	191639	193049		60.29	67.0431	68.0509	67.07	46.2616	58.522	58.1185	64.0736	YCR035C
chrIII	193244	194380		47.34	58.8769	112.082	108.125	58.4067	66.9085	81.2956	83.406	YCR036W
chrIII	194366	197228		41.61	37.6291	42.6646	28.1956	22.105	36.068	28.5578	25.577	YCR037C
chrIII	197549	199549		16.27	16.8338	18.4925	16.2787	10.8716	15.7912	14.887	16.183	YCR038C
chrIII	199494	200189		15.59	16.6723	13.3764	15.2964	30.7225	30.4281	40.602	36.8441	YCR039C
chrIII	201155	205419		26.1	30.7671	34.0634	32.3391	24.7429	30.2997	31.2959	32.099	YCR042C
chrIII	206093	206702		51.08	49.9868	41.7195	48.5108	65.7761	39.8938	49.6833	50.5357	YCR043C
chrIII	206778	207965		42.04	45.2945	31.3612	35.5778	44.267	38.2998	31.1226	30.9579	YCR044C
chrIII	209803	210469		35.32	47.7191	31.6385	40.8156	51.0073	44.343	23.8745	31.704	YCR046C
chrIII	210570	211633		35.28	50.2179	30.8576	38.5256	30.2899	35.3615	32.2123	35.5232	YCR047C
chrIII	211877	213957		19.72	26.1711	29.5048	31.4832	17.6081	31.3348	27.3947	27.3121	YCR048W
chrIII	214043	214873		42.56	59.881	26.7318	36.9061	45.0448	46.9569	26.1215	26.5871	YCR051W
chrIII	214929	216656		40.94	43.6194	43.173	42.2986	48.1549	38.7398	34.8029	39.2281	YCR052W
chrIII	216592	218398		85.11	83.3829	102.725	89.4078	76.4251	64.2431	90.0249	89.9462	YCR053W
chrIII	218307	220170		23.49	28.54	27.3638	26.9347	17.555	20.8686	29.1086	26.5776	YCR054C
chrIII	220342	223301	1_RiBi	56.28	66.6122	44.0095	43.0797	35.5873	38.9142	41.0301	39.3249	YCR057C
chrIII	223271	224248		35	49.9845	32.8829	42.0853	35.876	31.8226	25.48	28.396	YCR059C
chrIII	224373	224858		20.49	24.049	26.4611	29.9086	29.0113	19.2799	26.9704	23.9021	YCR060W
chrIII	225504	227816		12.16	28.6474	19.7838	20.9495	20.8435	37.923	29.0408	21.6925	YCR061W
chrIII	231449	233127		19.19	21.5788	20.686	20.2745	17.8612	27.1429	22.5329	19.7589	YCR066W
chrIII	233052	236440		26.82	34.5412	20.5	18.5968	24.1365	34.204	20.8962	17.4577	YCR067C
chrIII	238889	240108		26.42	34.4924	31.1353	30.9983	25.8584	41.7256	32.2203	26.1226	YCR069W
chrIII	240031	240591		32.27	38.7067	37.3274	38.1942	38.9922	35.4786	41.1359	38.5958	YCR071C
chrIII	240727	242385	1_RiBi	49.02	64.8012	35.7888	40.0714	34.2425	42.7834	38.242	35.2511	YCR072C
chrIII	242519	246647		16.8	23.6678	41.1006	38.9231	13.8998	27.077	27.2013	25.9355	YCR073C
chrIII	246925	248024	3_MSN2	17.19	26.5505	11.3608	18.5044	22.0228	36.9734	12.8637	13.4508	YCR073W-A
chrIII	247887	248844		12.23	15.6614	8.76716	11.9229	15.9182	17.0453	9.34772	8.77938	YCR075C
chrIII	248940	249284		14.99	21.426	13.8981	17.4863	25.6344	20.6767	16.3949	13.7031	YCR075W-A
chrIII	249017	250069		15.94	20.8373	15.7527	18.8748	19.6959	19.6096	14.2632	15.2487	YCR076C
chrIII	250111	252669		37.27	43.4439	36.6034	37.2863	36.4031	34.6618	29.9894	30.6853	YCR077C
chrIII	252792	254284		25.02	31.4064	30.1095	34.8355	26.9181	28.5501	22.2584	24.9448	YCR079W
chrIII	258702	259378		46.21	65.7571	33.4908	32.4113	53.9167	60.9629	31.2543	32.6683	YCR082W
chrIII	259542	260016	3_MSN2	13.4	21.9003	10.9072	17.4499	15.559	21.2708	14.5711	16.6748	YCR083W
chrIII	260252	262713		66.08	71.1439	58.6684	56.1257	57.4491	54.1607	41.166	45.5302	YCR084C
chrIII	263313	263993		32.45	42.4924	23.3672	32.2587	34.5881	29.4783	29.8058	28.2832	YCR086W
chrIII	263801	264512		49.8	63.7628	40.9851	53.1033	43.7389	33.9762	40.3147	45.532	YCR087C-A
chrIII	265021	266978		33.83	38.4706	27.2006	29.5513	29.2485	30.4087	21.9441	22.6651	YCR088W
chrIII	267137	272267		14.06	18.7109	23.4539	22.848	11.1996	18.9704	12.0892	14.4637	YCR089W
chrIII	272247	272909		28.38	30.0295	29.5806	32.8269	28.4466	22.4312	27.8012	30.9875	YCR090C
chrIII	274340	276685		6.306	8.95795	10.1941	11.497	8.1026	12.7271	9.60836	9.25076	YCR091W
chrIII	276607	279855		17.46	20.5448	19.3321	18.8191	15.4165	22.7402	18.545	17.3646	YCR092C
chrIII	280082	286541		55.49	64.9369	42.5428	39.2926	46.3989	50.0826	40.6945	35.5342	YCR093W
chrIII	286698	288213		16.79	18.4835	18.4001	16.5063	16.6739	19.8607	17.9561	16.6279	YCR094W
chrIII	288109	289314		22.31	22.5721	20.5278	18.2281	18.7676	30.8702	23.8839	19.7925	YCR095C
chrIII	293033	293713		18.92	19.6924	15.9156	18.2725	21.5411	23.3887	31.1928	28.7445	YCR096C
chrIII	293811	294340		35.75	29.6999	27.0043	38.443	2.54522	2.48223	2.90675	2.36548	YCR097W
chrIII	297041	298811		17.67	12.3839	15.2941	9.89509	11.8531	20.066	10.7862	10.5041	YCR098C
chrIII	304283	305536		5.817	11.2646	10.8151	11.1407	6.20802	15.9815	11.7049	11.6265	YCR102C
chrIV	8612	10050		6.947	13.7469	16.7708	12.1104	10.8539	23.7959	8.35417	9.83243	YDL246C
chrIV	11541	13541		5.482	7.74531	5.38707	5.73698	8.69378	11.7675	6.48613	5.97733	YDL245C
chrIV	20520	21299		12.17	16.4588	25.1436	18.0734	9.8844	22.4047	28.3475	24.0336	YDL241W
chrIV	22650	25909		22.11	26.6576	18.0665	18.6252	20.334	31.7851	21.7621	16.9443	YDL240W
chrIV	26371	28919		7.89	11.5249	12.3109	12.2225	9.3142	13.607	21.5398	15.6837	YDL239C
chrIV	28951	30494		10.44	14.2852	14.6132	18.7057	14.341	22.6725	17.813	14.7661	YDL238C
chrIV	30608	31910		19.15	19.644	20.7603	20.9673	19.2633	22.7354	22.8913	18.9279	YDL237W
chrIV	32228	33417		41.42	41.4362	53.1821	49.2927	42.6528	39.1926	55.1072	49.9611	YDL236W
chrIV	33286	34040		44.16	45.8381	54.6751	48.1881	46.4215	45.242	54.3536	41.7947	YDL235C
chrIV	34145	36619		23.03	28.9503	30.5796	25.0173	27.8455	40.4654	31.7535	29.3939	YDL234C
chrIV	36774	38342		13.36	17.676	14.6975	15.4926	15.7418	26.0487	13.8692	12.742	YDL233W
chrIV	38457	38882		56.52	51.6163	30.8418	37.6332	60.6512	45.2597	54.7042	36.0252	YDL232W
chrIV	38777	42354		34.29	35.851	28.3713	27.2416	29.5415	42.0192	30.8202	25.6759	YDL231C
chrIV	42646	43767		12.61	18.5587	13.8749	17.4637	14.7272	26.6254	10.4223	10.2785	YDL230W
chrIV	44034	46014		289.5	226.001	418.175	369.255	229.654	119.819	275.222	303.643	YDL229W
chrIV	46311	48069		41.11	34.1371	6.46406	7.02428	47.0237	34.5017	10.8911	7.08031	YDL227C
chrIV	50861	52203		39.79	41.8286	31.431	31.3054	39.2356	50.0449	39.5008	34.0772	YDL226C
chrIV	52394	54244		28.5	31.0361	26.8013	24.8663	24.0458	41.5904	32.3203	25.2634	YDL225W
chrIV	54154	56718		37.02	42.9484	37.0396	31.9697	35.8961	53.5634	40.8792	30.7425	YDL224C
chrIV	57135	60489	3_MSN2	9.944	14.9636	17.4976	18.4747	11.7809	18.7786	14.8537	15.5349	YDL223C
chrIV	60647	61908		6.47	9.11546	11.8725	14.569	15.2002	19.7437	14.0199	20.7287	YDL222C
chrIV	62097	65037		13.13	16.4083	11.5561	12.2661	11.1233	18.2736	10.5628	10.2056	YDL220C
chrIV	65187	65826		24.73	24.3365	14.2574	16.1274	25.6073	25.7481	21.6789	16.6986	YDL219W
chrIV	66486	67491		6.29	14.2313	9.80104	11.4849	5.95894	23.4588	9.23037	10.1613	YDL218W
chrIV	67587	68777		30.67	31.2328	31.4209	30.721	24.1715	26.2296	29.3715	28.139	YDL217C
chrIV	68679	70328		19.08	21.5212	19.8038	21.7127	23.8217	19.4212	21.2899	21.2595	YDL216C
chrIV	70486	73918		32.67	35.6879	36.8285	37.1299	31.9179	34.9814	42.4145	34.5372	YDL215C
chrIV	74404	76650		5.437	13.6076	10.5211	12.3365	6.13341	18.2251	9.189	7.72151	YDL214C
chrIV	77165	78005	1_RiBi	46.43	56.3623	36.319	36.5975	35.1708	30.8733	39.6731	32.4018	YDL213C
chrIV	78359	79203		47.71	50.1899	49.1934	44.884	47.6543	37.319	48.4648	46.1448	YDL212W
chrIV	79226	80490		25.67	27.4769	26.527	24.708	25.9114	22.7046	20.8844	21.4105	YDL211C
chrIV	86074	87267		28.38	32.2932	24.7004	25.5878	24.8548	23.5466	26.2059	24.7325	YDL209C
chrIV	87467	88076	1_RiBi	131.8	117.733	99.4387	120.029	127.31	82.6695	123.553	115.816	YDL208W
chrIV	88209	89939		28.82	32.3791	28.8254	29.3879	25.5224	25.6053	27.5072	28.1672	YDL207W
chrIV	90026	92480		8.529	10.4222	12.2446	13.2331	9.77426	16.8605	14.0834	13.7954	YDL206W
chrIV	92466	93928		35.93	38.5336	30.7529	32.4569	36.1378	27.7778	38.4152	34.3079	YDL205C
chrIV	94591	95788	3_MSN2	12.48	20.079	16.901	21.2361	20.2204	31.245	19.3997	26.2035	YDL204W
chrIV	96045	98151		20.54	24.3366	16.0662	16.4338	16.3993	20.7647	16.2042	14.7698	YDL203C
chrIV	98412	99320		41.06	44.4208	30.9869	34.0621	45.2451	31.7384	39.1585	37.3495	YDL202W
chrIV	99457	100506	1_RiBi	40.56	46.0911	38.9076	42.6701	36.5818	35.5228	43.8492	42.6514	YDL201W
chrIV	100430	101102		19.19	23.8554	20.1049	21.5409	17.2783	19.3418	21.1029	19.9039	YDL200C
chrIV	101237	103378		5.646	8.55883	11.9973	13.2889	5.82143	13.8628	9.09075	8.64452	YDL199C
chrIV	103525	104667		43.38	39.4332	25.0901	28.8456	55.7044	26.302	21.6464	24.4947	YDL198C
chrIV	104753	106872		26.49	31.5847	17.9153	20.9933	31.4292	32.0495	18.9048	19.335	YDL197C
chrIV	107078	111173		46.81	53.6493	35.7196	36.6781	46.9132	48.8479	33.5818	32.609	YDL195W
chrIV	111371	114402		6.354	8.8838	6.74524	7.03234	6.43253	11.1588	7.38628	7.82258	YDL194W
chrIV	114555	116020		36.4	36.8043	29.5641	33.4306	36.6912	36.6976	33.0792	31.6962	YDL193W
chrIV	116277	117141		162.2	121.105	119.523	118.825	155.969	86.4152	122.124	128.995	YDL192W
chrIV	117604	118618	2_RPG	293.8	103.157	329.604	318.746	296.382	61.4037	343.496	372.138	YDL191W
chrIV	118562	121786		27.57	24.0857	30.4166	31.3525	24.4911	26.7821	33.9406	33.5936	YDL190C
chrIV	121948	123684		29.75	30.5078	34.9679	30.464	29.7213	26.2785	32.9471	32.8589	YDL189W
chrIV	123780	125179		23.45	26.3909	25.5288	25.5673	22.9671	32.1439	24.1977	22.662	YDL188C
chrIV	125499	126504		23.53	29.8149	53.3384	51.6156	26.5635	33.6396	50.3892	50.785	YDL186W
chrIV	126669	130132		60.66	56.7438	95.7464	88.4985	58.8346	58.5543	91.411	90.4646	YDL185W
chrIV	130195	130563	2_RPG	689.3	413.245	475.42	587.19	608.911	302.743	579.551	572.905	YDL184C
chrIV	130813	131912		14.05	13.0522	16.7836	22.3508	13.202	27.4117	22.8728	19.137	YDL183C
chrIV	133390	134816		85.56	81.3672	54.5827	56.1903	91.4185	80.5285	52.9349	50.5528	YDL182W
chrIV	135015	135556		54.22	81.3563	16.2354	29.3013	168.799	126.476	26.5363	22.1906	YDL181W
chrIV	135763	137656		25.73	29.4444	29.6056	28.5825	27.5931	45.0641	28.464	27.5151	YDL180W
chrIV	138179	139287		62.71	50.5611	34.7801	38.3586	69.1519	47.0991	62.0032	55.3701	YDL179W
chrIV	139496	141188		26.19	27.8352	45.3531	40.8639	26.591	44.5202	49.6927	42.1902	YDL178W
chrIV	141110	141815		23.85	23.7444	30.519	30.3365	28.5842	31.7797	43.7357	38.3723	YDL177C
chrIV	141956	144334		18.22	20.2128	22.0805	21.0194	16.4252	24.9649	27.0336	25.0903	YDL176W
chrIV	144305	145550		29.22	32.82	26.7217	29.5749	28.8476	42.1608	29.8582	30.7609	YDL175C
chrIV	145732	147690		27.22	36.0066	70.0265	58.432	33.2655	55.004	61.7889	61.5433	YDL174C
chrIV	148147	149114		34.13	39.485	52.164	51.9907	39.8037	44.2366	46.8357	49.7823	YDL173W
chrIV	149081	155928		44.48	44.0942	90.9191	71.501	44.8426	37.8903	92.807	91.9165	YDL171C
chrIV	156289	158071		16.15	16.473	28.9597	22.5848	17.0708	19.8814	24.3261	24.1286	YDL170W
chrIV	157956	158775		3.367	5.34435	5.59016	5.50806	5.2857	10.6692	5.38949	6.21206	YDL169C
chrIV	159503	160818		22.27	33.4233	25.6256	27.6959	20.3991	43.9794	17.0425	20.0713	YDL168W
chrIV	160821	163212		43.2	46.0458	49.4722	43.2943	30.1229	38.3644	40.6273	41.8891	YDL167C
chrIV	163370	164115		52.34	51.887	38.2089	41.8927	44.9288	40.8146	36.4887	39.6162	YDL166C
chrIV	164240	164901		33.63	34.0076	32.7499	31.0021	34.1565	32.6443	31.3947	30.1931	YDL165W
chrIV	164836	167266		26.21	25.5041	13.0101	12.354	23.5136	32.4129	13.542	12.1452	YDL164C
chrIV	167697	169201		47.4	60.8249	34.4288	31.9162	42.6735	65.9474	27.3772	27.5322	YDL161W
chrIV	169167	169635		26.51	27.9754	34.0171	34.3035	27.2906	23.5895	28.5758	34.9357	YDL160C-A
chrIV	169787	172217		47.15	49.3952	47.1351	45.2808	46.4603	65.0566	48.3782	45.9177	YDL160C
chrIV	172434	174152		20.43	24.8307	26.2214	23.9431	17.8648	33.258	19.5914	21.2385	YDL159W
chrIV	174048	174657		29.24	31.064	22.1665	24.9877	30.1805	36.7002	26.2972	26.4131	YDL157C
chrIV	174822	176563		25.54	27.7955	15.265	15.7058	23.9873	26.318	14.3351	14.4534	YDL156W
chrIV	176632	178186		39.82	44.2965	28.13	25.0646	34.5374	36.7935	24.2073	23.1273	YDL155W
chrIV	178300	181117		12.65	17.0243	12.222	13.6176	13.6768	28.1717	13.5403	12.101	YDL154W
chrIV	181135	183058	1_RiBi	43.57	53.6025	42.0773	38.8985	31.7682	34.4749	37.7374	41.9024	YDL153C
chrIV	183231	184708	1_RiBi	37.16	41.4267	38.8807	38.3659	29.9056	33.3985	38.2407	38.7954	YDL150W
chrIV	184901	188062		8.003	11.654	9.93732	10.5536	8.37199	29.3695	11.0168	10.018	YDL149W
chrIV	187933	190652	1_RiBi	41.95	49.9254	41.8876	39.2311	29.9019	42.1609	46.8108	42.5095	YDL148C
chrIV	190864	192408		74.74	106.344	37.2167	38.2546	82.5683	137.944	46.2954	40.1833	YDL147W
chrIV	192593	194351		13.89	16.0218	19.2954	19.4903	15.9504	39.2653	17.0673	17.9363	YDL146W
chrIV	194407	198459		43.27	44.0518	37.6417	36.8142	36.9365	37.584	36.0558	32.4494	YDL145C
chrIV	198569	199782		28.79	38.7697	23.562	28.3997	36.7207	38.0876	21.6393	21.7446	YDL144C
chrIV	199955	201682		59.78	76.9837	48.9221	46.2389	55.5806	70.5476	45.7126	41.7045	YDL143W
chrIV	201574	202634		21.68	23.9528	20.268	21.2913	22.0251	25.9836	23.3079	21.8453	YDL142C
chrIV	202799	205375		19.68	21.7027	22.1562	22.0732	17.9675	21.9077	22.5974	22.5263	YDL141W
chrIV	205255	211103		67.92	77.0677	73.0479	64.9338	64.1559	49.7854	57.4672	60.555	YDL140C
chrIV	211271	212088		14.5	19.5788	26.1636	25.5567	16.199	17.8299	14.9107	20.5404	YDL139C
chrIV	213067	215788		28.52	25.8814	48.2815	46.0017	30.8744	27.945	39.2008	44.95	YDL138W
chrIV	215998	217228		107.7	67.9731	116.478	113.292	116.618	67.5185	88.7491	116.606	YDL137W
chrIV	217566	218448	2_RPG	242.6	93.3985	304.039	266.379	220.448	55.1434	265.237	298.568	YDL136W
chrIV	218425	219332		59.22	37.0989	61.7422	58.1481	50.6818	30.9151	62.54	66.4444	YDL135C
chrIV	219594	221307		45.67	38.7086	52.9987	51.8998	47.2656	39.0831	51.7651	51.5046	YDL134C
chrIV	221521	221818	2_RPG	548.5	211.077	373.395	498.653	509.11	96.5209	592.762	504.883	YDL133C-A
chrIV	222270	223837		35.83	32.0384	58.2382	53.4909	35.133	29.008	46.5803	52.7446	YDL133W
chrIV	223989	226941		23	30.9282	23.0935	22.6342	21.9217	37.1231	21.4638	21.2299	YDL132W
chrIV	227283	228819		72.16	56.8089	65.4055	61.0177	67.9056	54.7241	57.9445	58.9814	YDL131W
chrIV	229090	229595		13.14	15.6518	23.3708	34.4297	35.4498	49.0054	28.0675	28.743	YDL130W-A
chrIV	229789	230622	2_RPG	400.8	142.678	461.173	510.821	416.863	82.3117	413.132	485.799	YDL130W
chrIV	230874	231978		32.87	34.299	36.1037	37.7878	27.3501	36.0856	37.2449	34.328	YDL129W
chrIV	232535	234056		49.07	47.9811	44.9643	47.5462	47.4038	53.3144	44.7901	43.4766	YDL128W
chrIV	234855	236025		53.28	48.2919	76.0411	76.6809	60.8048	51.9357	72.2896	67.6284	YDL127W
chrIV	236084	238743		73.31	114.712	36.2797	37.684	83.877	105.914	31.2868	32.2951	YDL126C
chrIV	238881	239815		78.35	100.786	37.9558	50.8064	140.512	119.618	50.6647	50.6814	YDL125C
chrIV	240191	241270		41.87	61.2382	25.6052	31.5696	67.6327	72.8126	29.1658	33.1744	YDL124W
chrIV	241355	242323	3_MSN2	33.99	47.1953	42.3801	47.4623	45.4123	48.4628	43.7097	45.5435	YDL123W
chrIV	242310	245069		47.07	51.4831	60.5216	52.191	39.3489	56.8829	51.7326	52.837	YDL122W
chrIV	244930	245626		45.15	45.0593	36.1151	34.8165	40.2129	40.7216	41.2592	40.8974	YDL121C
chrIV	245826	246603		36.84	37.1767	42.8544	44.9314	48.2481	43.9236	46.7624	45.8672	YDL120W
chrIV	246534	247783		17.62	20.4141	29.5744	30.8542	22.1631	23.8635	23.3861	25.0878	YDL119C
chrIV	248169	251374		37.53	34.9964	32.63	32.5453	35.9011	27.7575	44.896	38.7119	YDL117W
chrIV	251498	253803		38.1	38.4495	33.0121	28.2856	32.0042	35.9184	32.6263	29.2417	YDL116W
chrIV	253888	255174		25.6	33.7125	19.2237	19.4642	27.1869	49.6375	25.8848	21.5762	YDL115C
chrIV	256518	258640		16.33	18.5313	14.4989	15.0013	18.0267	30.1144	19.4413	16.461	YDL113C
chrIV	258834	263245		22.81	29.7285	19.8665	19.118	15.2161	38.157	20.5113	18.0792	YDL112W
chrIV	263306	264178		54.76	59.458	47.0784	42.2245	49.6033	56.5047	42.3543	41.9126	YDL111C
chrIV	264322	265020		25.23	41.21	57.8531	55.3148	53.44	75.1253	67.2242	63.5718	YDL110C
chrIV	265106	267542		14.8	19.3508	22.1783	21.6941	16.3103	26.4046	18.174	18.8113	YDL109C
chrIV	267674	268785		25.18	28.8956	21.9057	24.415	26.0191	31.7007	24.3101	23.4947	YDL108W
chrIV	268887	270130		23.01	24.0905	23.7562	23.6702	27.127	25.5038	23.4533	23.9618	YDL107W
chrIV	270221	271964		28.72	31.8287	30.8269	27.0951	31.2739	40.0765	27.7366	27.691	YDL106C
chrIV	272353	273644		23.58	23.1699	20.5314	16.1894	18.8151	29.3388	15.9433	15.1488	YDL105W
chrIV	273608	274894		20.85	21.033	25.5217	20.3259	16.0463	22.5466	17.1732	18.4787	YDL104C
chrIV	275030	276653		19.27	19.296	18.3231	18.1836	17.8366	25.3563	14.2191	15.8974	YDL103C
chrIV	276777	280378		16.48	18.9078	15.6006	13.9903	13.8822	22.6665	13.4346	14.1136	YDL102W
chrIV	280141	281908		19.92	22.3135	10.9383	11.6963	19.6354	29.8605	13.8653	12.7826	YDL101C
chrIV	282029	283211		56.96	67.2072	36.3634	37.22	60.4014	73.6169	32.279	36.881	YDL100C
chrIV	283302	284523		36.95	44.6274	36.1963	37.7141	41.1806	47.6415	40.5869	47.4398	YDL099W
chrIV	284441	285174		19.62	22.8895	22.0717	23.3696	17.6026	23.657	20.0423	25.6805	YDL098C
chrIV	285305	286752		64.1	93.3129	29.8689	31.2994	67.4513	91.1435	27.8939	29.0035	YDL097C
chrIV	286978	289591		57.08	57.9744	35.4039	35.3015	48.6293	58.7776	25.2856	25.7378	YDL095W
chrIV	289860	292412		15.83	18.0389	14.1447	15.8579	12.3791	25.4596	14.705	15.6824	YDL093W
chrIV	292748	293359		49.88	52.4866	44.3136	47.6027	59.6501	49.0806	53.8507	52.5377	YDL092W
chrIV	293297	294852		15.74	20.2137	20.8533	20.41	16.373	31.0711	19.4885	20.002	YDL091C
chrIV	294986	296362		16.5	20.1069	19.5914	23.5688	16.8585	28.4262	20.8364	19.2175	YDL090C
chrIV	296520	298342		14.52	15.6151	19.074	21.3787	14.4507	22.5731	21.7589	22.9157	YDL089W
chrIV	298262	300141		41	47.2754	48.22	43.9322	35.238	47.2217	45.9523	41.0092	YDL088C
chrIV	301373	302295		40.94	51.4981	94.7324	97.6182	64.9929	73.8379	105.977	115.97	YDL086W
chrIV	302416	302748		19.47	25.4187	41.5494	45.695	31.3552	47.1292	48.7446	58.1743	YDL085C-A
chrIV	303184	304873		14.44	19.5003	13.954	17.6338	17.5821	35.2121	17.3113	16.2375	YDL085W
chrIV	305052	306688		78.91	80.3952	64.1405	66.265	76.5786	83.949	68.8237	69.6453	YDL084W
chrIV	306804	307871	2_RPG	316.7	98.9139	415.691	416.165	308.697	47.7173	331.852	415.253	YDL083C
chrIV	308385	309526	2_RPG	258	93.1959	328.7	314.748	229.03	59.524	285.123	334.538	YDL082W
chrIV	309692	310234	2_RPG	328.2	147.327	295.644	335.546	292.325	89.0712	326.828	338.172	YDL081C
chrIV	310490	312665		32.43	28.9671	34.7849	42.0516	32.5072	34.212	37.8109	38.2707	YDL080C
chrIV	312830	314766	3_MSN2	12.34	13.9253	16.107	17.2942	14.3607	26.8715	17.9526	17.8233	YDL079C
chrIV	315272	316459		19.3	23.5739	22.9139	24.7352	24.8873	36.1103	27.7147	26.2575	YDL078C
chrIV	316868	320253		11.39	10.5946	23.6299	21.5641	11.2808	13.2437	21.411	22.179	YDL077C
chrIV	320461	321698		21.1	20.335	39.6695	40.3843	24.2013	28.9146	32.2061	37.0388	YDL076C
chrIV	322194	323058	2_RPG	369.2	109.26	393.363	381.708	333.745	44.8604	418.425	459.091	YDL075W
chrIV	323952	326232		48.47	49.7717	43.2566	42.4098	41.4625	47.7318	49.3835	43.3984	YDL074C
chrIV	326426	329623		19.24	21.1715	20.8132	19.0279	17.5606	21.4254	22.8648	19.6676	YDL073W
chrIV	329759	330517		48.72	68.8173	29.8576	39.3402	60.1354	91.0932	32.0815	28.3416	YDL072C
chrIV	330991	333099		114.1	128.287	68.7712	62.7909	103.504	103.95	66.0177	58.9981	YDL070W
chrIV	333981	334453		75.78	68.9651	38.3226	49.2568	118.042	83.9282	66.3162	53.9474	YDL067C
chrIV	334799	336264		35.22	40.3875	39.7743	40.5877	47.9016	50.9466	40.3053	37.6034	YDL066W
chrIV	336165	337317		32.85	38.2866	36.789	34.5622	36.4601	45.4798	34.6484	34.2854	YDL065C
chrIV	337443	338191		35.76	39.463	20.6492	26.3922	39.159	46.5719	35.5139	28.8072	YDL064W
chrIV	338114	340234		47.7	53.3902	35.3455	37.1051	30.1558	34.8918	43.777	40.9253	YDL063C
chrIV	340459	341219	2_RPG	301.2	110.334	330.792	321.04	271.38	72.3277	342.899	376.511	YDL061C
chrIV	341598	344105	1_RiBi	45.6	47.8771	53.3078	51.3817	30.7451	33.7872	45.5299	48.4253	YDL060W
chrIV	343976	345065		13.75	14.6994	13.2477	15.9721	16.6135	18.2335	15.2043	16.5433	YDL059C
chrIV	345609	351182		20.98	23.6412	25.9065	23.6328	18.0238	24.4165	29.6694	27.3321	YDL058W
chrIV	351398	352462		15.22	15.8969	22.6333	25.2866	13.4123	19.6595	20.1146	19.9767	YDL057W
chrIV	352761	355470		30.03	35.4429	30.4743	30.4431	28.6002	40.2175	33.7112	30.0364	YDL056W
chrIV	355430	356907		313.1	291.747	155.661	156.419	354.993	309.056	157.947	168.313	YDL055C
chrIV	359736	361373		11.48	16.1866	13.6208	13.6192	13.76	27.022	15.1175	18.8022	YDL054C
chrIV	361509	362365		36.84	41.8344	44.0395	43.9882	34.0897	50.2961	44.6189	42.3111	YDL053C
chrIV	362614	363634		58.03	64.6246	45.3709	53.5822	62.9983	99.4255	64.7827	64.1789	YDL052C
chrIV	363902	364882		97.28	95.9436	62.4529	71.5924	79.6069	86.6953	80.019	79.1405	YDL051W
chrIV	364978	366002		30.2	34.0839	20.4632	26.9214	27.3349	53.4817	22.6781	22.8336	YDL049C
chrIV	366622	368319	1_RiBi	18.3	28.9605	15.0453	20.2621	23.2314	49.9475	16.7765	18.77	YDL048C
chrIV	369526	371010		54.88	57.6847	46.4624	45.9084	47.8235	70.0127	42.5822	43.8188	YDL047W
chrIV	371144	372039		54.53	69.4957	58.7023	63.8487	57.8757	102.887	51.1565	56.9289	YDL046W
chrIV	372198	372654		47.78	48.68	45.9708	56.0257	54.1254	66.93	55.0782	55.5713	YDL045W-A
chrIV	372628	373772		19.82	23.2985	21.6513	22.5613	19.2293	31.2535	20.8861	21.8777	YDL045C
chrIV	373885	375313		25.31	25.4272	29.8988	30.0614	20.5235	32.89	26.285	29.4211	YDL044C
chrIV	376594	378504		28.48	20.1387	17.4607	20.43	16.2191	12.9462	11.969	17.3065	YDL042C
chrIV	378761	381496		30.18	30.356	28.142	29.534	23.9308	32.6173	28.6269	26.9458	YDL040C
chrIV	387374	388908		37.18	43.2373	33.9547	28.2686	24.414	38.2468	34.9423	31.8673	YDL036C
chrIV	389038	392339		28.81	30.0313	48.0418	39.3635	23.6323	34.1484	38.7992	40.1575	YDL035C
chrIV	392477	393957		40.2	58.005	38.2934	39.2563	37.7604	60.1207	31.0073	31.5581	YDL033C
chrIV	394154	397292	1_RiBi	35.15	44.2099	30.0577	29.7608	22.4983	34.8388	32.6572	28.1039	YDL031W
chrIV	397456	399218		23.63	28.4612	19.4884	20.9743	19.5692	26.6506	21.988	21.5674	YDL030W
chrIV	399305	400766		42.17	45.1265	30.9546	33.0901	41.56	60.5158	34.618	29.8609	YDL029W
chrIV	400850	403465		26.24	30.4577	19.7238	20.2303	27.2148	40.3374	26.4434	21.9137	YDL028C
chrIV	403528	405001		13.94	16.1896	12.3768	15.2769	18.0687	27.2691	15.4163	15.4079	YDL027C
chrIV	405144	407414		16.75	22.7205	20.0433	21.4844	22.2245	36.0428	21.5613	22.5863	YDL025C
chrIV	411749	413133		27.1	65.0368	26.1296	36.1357	69.2722	215.967	26.4869	31.1836	YDL022W
chrIV	413927	414952		15.42	17.6037	11.6549	15.8964	24.5051	29.4496	23.9578	20.4989	YDL021W
chrIV	414965	416959		80.6	149.155	38.5171	40.6391	87.952	381.954	67.896	57.0408	YDL020C
chrIV	417522	421725		15.15	22.1291	19.0262	21.0837	16.7978	30.2112	23.2044	20.1273	YDL019C
chrIV	422644	423581		23.59	22.2702	16.0476	18.797	24.3924	27.3918	26.0839	20.3871	YDL018C
chrIV	424098	425795		17.3	20.1428	15.1677	16.1646	16.5035	19.451	18.0328	14.9269	YDL017W
chrIV	425775	426985		48.43	57.0106	43.2264	45.6374	50.8506	49.6626	61.938	47.1178	YDL015C
chrIV	427213	428562	1_RiBi	171.3	171.905	183.152	175.483	135.216	88.1805	142.659	151.795	YDL014W
chrIV	428928	431034		26.4	29.3277	37.1017	36.7401	23.8866	32.6377	28.9676	31.3607	YDL013W
chrIV	430954	431539		56.17	61.671	44.4987	46.0132	54.6716	60.7651	46.4107	44.267	YDL012C
chrIV	432284	433303		32.92	30.5033	17.9236	17.4252	31.5504	36.4905	31.4605	22.1939	YDL010W
chrIV	433465	434134		69.43	75.1072	47.2383	56.8833	69.7321	54.1268	64.4032	53.7301	YDL008W
chrIV	437998	439443		60.53	93.622	23.5479	22.72	63.0681	103.234	31.4598	24.3768	YDL007W
chrIV	439586	440870		32.91	38.378	23.7814	23.1985	32.9759	45.9806	30.6716	24.1506	YDL006W
chrIV	440782	442369		34.72	42.2971	27.2493	25.0651	34.1522	44.3646	31.4888	26.3158	YDL005C
chrIV	442956	443710	3_MSN2	58.66	62.8689	19.687	25.9272	90.6401	71.2545	33.5875	23.634	YDL004W
chrIV	444557	446500		58.92	59.0539	14.0087	17.5316	64.7142	71.9772	23.3855	15.9064	YDL003W
chrIV	446679	447684		37.92	39.4701	31.9291	32.7227	38.6778	39.3047	48.5045	37.0182	YDL002C
chrIV	447902	449393		26.53	28.0451	16.9713	19.1358	23.4192	31.7815	26.1775	21.0269	YDL001W
chrIV	450106	452742		22.2	32.1966	39.6592	47.0953	30.8615	73.2676	45.6007	35.6415	YDR001C
chrIV	452963	453835		85.38	97.6141	63.2565	70.1462	82.2521	72.2779	70.5665	67.7391	YDR002W
chrIV	454075	454819		34.02	51.2405	26.6516	29.482	41.5604	66.7302	35.5335	28.2161	YDR003W
chrIV	455200	456811		36.23	38.8101	31.3756	28.1648	35.5845	48.4732	41.5176	33.6911	YDR004W
chrIV	456666	458303		34.66	33.2874	23.462	24.9005	33.1531	35.1452	33.6633	28.2377	YDR005C
chrIV	458452	461396		42.28	55.2879	33.1761	31.6497	36.7007	41.3845	35.0571	28.0381	YDR006C
chrIV	461609	462656		43.27	49.7309	22.7063	27.5446	47.6712	38.884	28.0937	24.9545	YDR007W
chrIV	463279	465550		25.28	28.3208	15.1434	18.2882	48.0169	26.8128	22.5986	25.6587	YDR009W
chrIV	465578	470605		175.8	179.103	92.128	111.337	203.421	138.55	122.087	150.556	YDR011W
chrIV	471803	473020	2_RPG	301.4	271.187	375.853	368	267.437	157.923	258.883	289.931	YDR012W
chrIV	473139	473872		40.1	39.5349	30.9725	32.8236	38.7728	46.9753	33.1959	31.6242	YDR013W
chrIV	478352	478792		25.46	30.5529	15.9416	18.8883	39.5137	35.8236	22.2351	17.8176	YDR016C
chrIV	478943	482279		45.93	47.9178	34.7411	30.7438	31.6233	46.1241	37.3837	33.4548	YDR017C
chrIV	484005	485414		7.49	18.9664	49.9073	47.7067	7.92556	28.094	23.0329	22.0756	YDR019C
chrIV	485451	486563		28.56	36.8457	29.8989	29.863	24.7391	30.9347	28.3234	25.1212	YDR020C
chrIV	486695	488055	1_RiBi	28.17	36.3367	23.0444	25.5816	19.0313	24.4983	30.8262	27.838	YDR021W
chrIV	487965	488668		19.16	23.0533	18.9022	20.5545	17.65	24.7169	25.1454	19.5241	YDR022C
chrIV	489432	491053	1_RiBi	97.32	74.9891	118.626	101.897	73.8892	52.8277	100.007	111.731	YDR023W
chrIV	491449	492413	2_RPG	372.9	116.554	395.48	409.408	350.267	61.5694	365.207	408.053	YDR025W
chrIV	492469	494416		34.03	31.0241	42.4113	41.0333	26.4404	27.1205	35.5072	39.0048	YDR026C
chrIV	494574	497447		22.95	29.1495	26.1387	25.2227	22.1515	37.5351	26.772	24.1425	YDR027C
chrIV	497555	501379		33.04	39.7742	45.2906	40.0005	31.3155	41.4485	39.0928	35.4282	YDR028C
chrIV	501638	503279		21.4	27.8071	17.9571	21.4815	25.4522	28.5808	22.5019	21.4	YDR030C
chrIV	503451	504011		10.47	13.4554	9.89218	15.4154	16.2313	25.5305	21.2754	16.0988	YDR031W
chrIV	503944	504762		16.32	25.4988	11.7245	16.7897	24.9578	38.3951	17.6436	16.1339	YDR032C
chrIV	507777	509549		167.8	130.437	39.4164	71.914	294.084	90.5746	188.049	145.459	YDR033W
chrIV	509494	512250		36.08	33.6527	53.643	46.6186	30.8702	38.7454	48.7488	47.7084	YDR034C
chrIV	521725	523148		46.3	49.044	51.2186	47.4591	59.0481	44.2032	43.2007	45.0689	YDR035W
chrIV	523137	524783		20.49	25.7113	19.1151	21.5497	16.5295	28.6778	22.2968	19.7094	YDR036C
chrIV	525278	527282	1_RiBi	132.1	125.35	183.956	152.565	115.049	89.5637	155.193	166.815	YDR037W
chrIV	527277	530791		25.24	32.1976	34.3356	30.1139	21.0594	31.0062	29.4693	32.0511	YDR038C
chrIV	531187	534676		24.09	30.8069	32.774	28.7518	20.7234	30.3312	28.3628	30.484	YDR039C
chrIV	534970	538894		18.9	24.5948	30.2989	25.0745	15.5694	25.3262	25.0739	28.1403	YDR040C
chrIV	539759	540573		35.85	38.5107	31.6435	28.5957	39.7249	52.2386	40.872	31.6073	YDR041W
chrIV	542553	543569		50.7	45.8344	286.138	258.697	52.3918	66.4562	343.695	328.975	YDR043C
chrIV	546388	547765		19.91	24.6128	59.9276	54.6682	16.0206	32.9334	138.008	135.552	YDR044W
chrIV	547839	548467		39.01	45.9608	27.477	30.1727	36.1628	38.6607	37.7075	31.8221	YDR045C
chrIV	548682	550668		72.72	64.8924	17.4706	25.6918	77.7338	79.0215	41.1094	29.0425	YDR046C
chrIV	551389	553027		68.06	65.0708	28.3332	33.741	65.583	62.5392	43.4917	36.7274	YDR047W
chrIV	553224	555249		26.54	29.385	20.7203	20.6415	21.5397	25.2601	22.9469	19.5384	YDR049W
chrIV	555646	556500		509.9	533.682	415.708	341.702	449.102	412.423	313.852	284.588	YDR050C
chrIV	556993	558104		32.64	43.8497	35.5888	33.3224	33.8597	45.3215	41.4436	35.5683	YDR051C
chrIV	558263	560777		39.82	42.1744	34.5045	30.0704	35.3128	36.9811	33.8848	29.5528	YDR052C
chrIV	560970	562528		49.37	51.3939	51.1291	48.0285	46.2542	43.5625	48.9247	46.5521	YDR054C
chrIV	563446	565020		52.62	46.2046	100.476	95.9552	92.81	52.8991	144.651	143.295	YDR055W
chrIV	564917	565750		33.48	33.7892	30.9511	31.7357	38.172	42.4027	52.5095	49.0041	YDR056C
chrIV	565877	567633		14.31	17.0736	18.7214	19.737	15.0018	22.0947	19.1287	20.6984	YDR057W
chrIV	567588	568734		7.027	8.30508	9.2076	9.88771	8.33424	11.1862	13.0818	10.9064	YDR058C
chrIV	569094	569824		15.26	26.2738	15.6543	17.6562	23.5432	30.5033	22.2907	16.3058	YDR059C
chrIV	570553	573815	1_RiBi	60.23	70.4534	43.4091	45.0722	40.3415	48.1025	55.2524	47.8509	YDR060W
chrIV	574107	575894		22.78	25.1321	24.8992	27.6817	21.8504	31.7404	28.8834	25.4205	YDR061W
chrIV	576067	578447		43.94	42.3995	53.2208	49.0205	39.5011	41.7686	58.9236	53.3577	YDR062W
chrIV	578533	579242		45.61	36.2092	61.0288	74.9851	56.012	46.7279	66.3179	67.1926	YDR063W
chrIV	579358	580549	2_RPG	536	199.839	651.364	593.504	486.726	93.2033	600.591	618.787	YDR064W
chrIV	582707	583535		27.74	32.4776	31.9021	37.0274	34.9886	40.3426	44.4837	41.0821	YDR067C
chrIV	583658	584819		24.01	30.0105	35.1546	31.7221	25.4828	36.7025	41.0113	38.1124	YDR068W
chrIV	584636	587780		13.21	21.771	28.1175	26.8343	15.8293	35.9632	29.0265	31.3998	YDR069C
chrIV	588020	588456		17.26	22.5697	16.6374	25.7679	27.4343	36.8769	27.1147	28.2455	YDR070C
chrIV	588743	589542		50.32	54.8845	35.1551	37.8987	52.6705	81.9357	50.5918	42.4638	YDR071C
chrIV	589662	591538		49.36	59.4139	38.1774	41.5818	54.2676	74.5104	51.4989	48.5877	YDR072C
chrIV	593676	596825		25.49	30.59	27.3141	40.1561	43.1781	82.0859	35.033	35.8428	YDR074W
chrIV	596951	598245		28.99	30.4314	20.1001	22.6498	23.0617	32.2318	28.0747	24.8043	YDR075W
chrIV	600726	602135		200.1	213.614	1143.61	1165.71	479.327	386.398	567.446	579.722	YDR077W
chrIV	601868	602884		48.5	47.8965	177.365	155.645	80.4524	92.8998	135.672	150.128	YDR078C
chrIV	603028	603690		25.13	30.1125	25.4785	31.9952	30.9973	39.4458	36.2997	37.0152	YDR079W
chrIV	603378	603884		25.1	28.211	28.0302	33.8323	34.0646	35.595	37.6982	41.115	YDR079C-A
chrIV	603974	607158		12.4	13.8887	14.0366	14.842	10.398	20.8467	16.4034	15.9374	YDR080W
chrIV	607160	610166		23.73	27.2869	28.4064	25.241	20.274	36.4731	27.3007	24.3754	YDR081C
chrIV	610347	611981		24.58	30.0745	26.2906	24.5792	23.4146	31.8521	25.7153	23.7466	YDR082W
chrIV	612049	613367	1_RiBi	38.5	42.5253	35.0306	30.0026	24.958	42.4528	36.0187	35.8021	YDR083W
chrIV	613201	614072		23.46	25.7361	23.7849	22.0787	28.1739	32.7009	24.9405	22.6367	YDR084C
chrIV	614198	616294		9.701	12.1755	36.746	35.3583	12.8057	21.9795	19.0693	22.2376	YDR085C
chrIV	616730	617289		78.63	69.7774	85.8684	87.8008	94.8346	90.9784	96.4585	79.8537	YDR086C
chrIV	617375	618364	1_RiBi	60.03	71.8182	46.251	50.2507	45.4314	57.8221	43.3426	44.1574	YDR087C
chrIV	622067	624813		18.68	27.0731	20.9369	16.8137	25.8812	39.1177	17.4485	12.6311	YDR089W
chrIV	624824	626116		24.25	29.3735	35.1538	25.6076	23.3654	33.8183	25.1352	23.4261	YDR090C
chrIV	626372	628604	1_RiBi	64.61	64.9834	61.2853	55.134	51.8886	51.1044	63.1134	57.7473	YDR091C
chrIV	629840	630700		43.73	53.3951	40.378	36.6345	49.998	63.6502	46.7111	44.8798	YDR092W
chrIV	631014	636173		28.54	33.9355	33.5206	26.0626	26.5326	35.6159	30.7946	28.1481	YDR093W
chrIV	639942	643928		20.29	22.208	10.0399	9.06004	18.2949	35.2058	11.5362	9.65944	YDR097C
chrIV	644126	645035		47.33	52.7718	45.3491	38.312	49.537	68.058	50.0691	39.4139	YDR098C
chrIV	652780	654650		62.34	75.1247	65.4869	59.6939	66.2515	118.854	85.3405	65.7317	YDR099W
chrIV	654968	655571		21.94	26.1581	17.4732	21.6158	22.8404	37.5812	22.1104	17.1983	YDR100W
chrIV	655565	657492	1_RiBi	65.2	72.6386	52.797	47.29	40.7603	53.1027	52.6281	47.3831	YDR101C
chrIV	658303	661142		28.61	34.3423	31.5456	27.4479	25.6021	40.6118	31.7051	26.1542	YDR103W
chrIV	661026	664946		9.31	13.515	16.1862	13.5086	8.82074	15.9907	12.6061	12.4052	YDR104C
chrIV	665249	666841		13.56	16.5125	13.3285	15.397	16.4019	24.9332	14.4598	12.8809	YDR105C
chrIV	668873	671059		22.78	48.2521	29.5183	29.6909	17.9246	80.579	31.7139	31.0467	YDR107C
chrIV	671200	673412		15.67	27.4379	16.2665	16.4724	15.8563	62.1916	22.168	18.4692	YDR108W
chrIV	673399	675667		15.71	18.8757	17.0608	16.662	13.9438	23.9817	16.7468	15.1945	YDR109C
chrIV	676045	678008		24.18	27.9546	21.9127	22.1315	19.6164	33.921	23.1299	22.3941	YDR110W
chrIV	678009	680015		20.32	19.6873	24.2673	23.1766	21.0396	27.0185	23.6023	19.098	YDR111C
chrIV	680419	681717		27.56	31.4026	37.2925	30.3123	31.1197	31.4407	27.141	24.1415	YDR113C
chrIV	682117	682612		31.52	32.8218	22.2887	31.6171	41.3467	45.7167	38.2486	33.6677	YDR115W
chrIV	682599	683614		30.15	32.6925	26.5014	29.7017	31.4494	32.663	30.0639	30.0178	YDR116C
chrIV	683898	685687		20.48	21.0722	18.2799	17.8737	17.7715	24.043	19.4782	16.6577	YDR117C
chrIV	685850	688032		20.86	21.4498	16.8911	19.6076	20.4174	23.1224	22.599	20.3435	YDR118W
chrIV	688116	690615		37.41	38.615	57.3746	56.746	38.808	39.4292	79.8637	74.6161	YDR119W
chrIV	690964	691460		11.26	10.2923	61.5569	70.3966	29.6516	24.4967	113.785	129.621	YDR119W-A
chrIV	691332	693261		35.76	35.1757	32.4445	35.6203	25.4855	24.5153	36.6219	37.9079	YDR120C
chrIV	693440	694283		28.67	34.2069	24.4541	26.6429	25.8119	30.3172	24.4607	23.0759	YDR121W
chrIV	694381	698104		19.66	28.1551	14.8748	16.4838	22.685	44.203	16.3553	14.468	YDR122W
chrIV	698024	699506		29.09	30.9721	13.8076	14.8558	20.5459	32.7921	15.1289	14.7946	YDR123C
chrIV	704378	709303		42.64	40.4325	35.3488	34.0102	40.416	35.7074	31.4642	26.9274	YDR127W
chrIV	709503	713206		18.59	23.1249	16.5638	16.1748	16.0306	20.7332	18.7449	16.6557	YDR128W
chrIV	713192	715450		40.03	47.8368	40.2815	39.2371	42.8301	76.1206	50.7682	43.6819	YDR129C
chrIV	715459	716648		29.37	31.3625	17.7741	21.5274	35.8146	39.4755	28.0435	25.5775	YDR130C
chrIV	716703	718557		13.3	15.3085	17.7172	17.0341	15.7783	18.3875	17.8608	16.1366	YDR131C
chrIV	718697	720422		21.66	22.6046	23.3163	23.4372	18.3142	99.9449	27.8096	22.1183	YDR132C
chrIV	722911	727592		26.56	34.8495	36.2371	34.7228	25.1887	35.194	34.6183	33.8287	YDR135C
chrIV	728152	730388		20.41	20.5814	22.2111	20.0662	17.9038	22.3921	22.2181	22.422	YDR137W
chrIV	730543	733490		27.42	31.3164	31.1486	27.6539	23.7472	40.537	33.5975	28.609	YDR138W
chrIV	733442	733978		33.01	36.673	20.4543	26.7817	40.5897	37.5107	33.2629	28.473	YDR139C
chrIV	734122	734852		28.67	32.5453	22.6169	24.7536	25.1565	26.7795	25.8672	24.0008	YDR140W
chrIV	734724	740099		19.42	22.6249	26.5206	21.9356	17.9925	29.4482	27.6651	23.3713	YDR141C
chrIV	740357	741746		16.66	19.7059	22.027	20.7169	19.1217	17.9235	20.3621	20.569	YDR142C
chrIV	741961	744045		34.4	37.162	34.929	34.6666	32.574	34.1729	32.1441	30.5878	YDR143C
chrIV	744225	746261		41.76	42.5307	26.8786	29.3833	35.209	38.814	28.1726	26.9367	YDR144C
chrIV	746648	748390		33.03	39.9672	31.0848	28.7828	34.0783	38.8611	28.9971	26.2244	YDR145W
chrIV	748612	750911		31.1	33.4446	5.98693	17.4115	35.6906	31.3226	32.9161	23.4804	YDR146C
chrIV	751558	753400		18.3	18.9239	12.6477	13.9441	18.1302	20.7066	22.2727	17.949	YDR147W
chrIV	753395	755327		20.57	26.6739	17.6161	20.2203	36.4935	33.4549	22.86	19.9288	YDR148C
chrIV	755558	763923		19.49	24.207	13.2636	14.4174	19.0919	18.9587	15.9492	14.5185	YDR150W
chrIV	763919	765317		59.11	70.5078	32.5486	37.2217	70.4469	124.593	41.3277	37.9863	YDR151C
chrIV	765628	766560		71.58	86.6593	55.5181	51.4183	71.519	79.2579	60.5602	54.3872	YDR152W
chrIV	766611	768048		59.16	57.7312	58.3985	51.5567	56.0961	58.5477	59.9687	57.2983	YDR153C
chrIV	768402	769094		236.6	391.597	58.565	84.1261	337.846	494.501	63.9493	61.0948	YDR155C
chrIV	769467	770032	1_RiBi	101.9	113.853	59.857	75.9811	102.496	127.053	72.1933	71.7023	YDR156W
chrIV	770316	771577		81.89	71.6171	63.4263	61.5808	88.0614	57.8906	61.8484	61.4139	YDR158W
chrIV	771778	775841		19.15	22.9136	20.1428	19.7057	17.7214	24.0147	22.3239	19.6014	YDR159W
chrIV	775979	778772		14.87	17.3346	19.4377	19.1205	13.1609	20.9823	18.9841	18.0737	YDR160W
chrIV	779000	780286		34.23	41.1363	29.451	30.1349	25.8733	33.3384	34.433	30.0847	YDR161W
chrIV	780211	781230		26.88	30.8832	33.2201	31.6533	28.5709	35.3788	27.0455	30.1275	YDR162C
chrIV	781348	782055		26.57	30.317	33.0983	32.7227	31.0557	37.5868	30.6349	32.6018	YDR163W
chrIV	781927	784265		18.01	20.2144	19.413	18.662	16.193	20.5131	20.1977	19.407	YDR164C
chrIV	784827	786295	1_RiBi	51.04	54.1127	45.5345	44.6281	36.2917	46.9181	50.5752	46.6875	YDR165W
chrIV	786194	789292		21.65	24.6762	23.8185	21.0816	19.7056	40.3552	26.6372	24.5677	YDR166C
chrIV	789412	790170		39.45	45.3003	36.1785	41.0213	39.4931	39.079	34.0798	33.6988	YDR167W
chrIV	790286	791926		28.44	34.9472	28.4863	26.0487	28.9893	36.5682	30.6532	28.0194	YDR168W
chrIV	792106	794253		19.4	22.8406	21.1021	19.8599	20.5109	35.4039	22.2841	18.6356	YDR169C
chrIV	795993	802438		25.56	28.5026	23.8374	20.9756	23.9946	24.6106	22.4279	20.6826	YDR170C
chrIV	806533	807833	4_HSF1	15.14	74.1604	7.55845	11.9247	59.5156	535.445	9.66858	11.5559	YDR171W
chrIV	808249	810558		97.46	95.5233	107.035	93.3993	91.3476	65.2023	84.4006	90.2912	YDR172W
chrIV	810494	811697		27.78	28.1511	15.3483	23.7086	30.5872	41.056	24.0668	19.4736	YDR173C
chrIV	812073	813022		150.8	82.5636	110.475	148.877	169.054	81.2976	120.473	116.798	YDR174W
chrIV	813072	814209		30.3	30.3713	33.2319	33.0127	31.8062	35.3722	32.1448	29.9499	YDR175C
chrIV	814402	816829		36.49	40.8485	28.0767	28.3679	36.6286	44.9974	30.2458	28.7389	YDR176W
chrIV	816836	817588		35.86	39.4721	20.4924	21.3763	28.3429	51.5536	21.0792	19.3625	YDR177W
chrIV	817827	818665		15.41	23.3269	12.0284	12.4733	30.7403	39.9294	12.4134	10.0495	YDR178W
chrIV	818582	819229		13.13	13.1268	5.97057	7.96623	13.7304	20.6016	11.9452	9.74626	YDR179C
chrIV	819330	820976		15.53	17.393	13.7518	13.3986	13.02	17.8899	15.8836	13.0182	YDR179W-A
chrIV	821150	825825		13.31	18.8025	11.638	10.4422	10.3367	22.0658	14.1588	10.7142	YDR180W
chrIV	825767	827383		20.42	25.2164	23.4635	21.1054	20.5562	25.6737	22.9448	22.2302	YDR181C
chrIV	827527	829170		22.24	24.8435	22.5109	22.334	23.6917	30.6827	22.9707	22.4586	YDR182W
chrIV	829513	830324		22.39	26.3518	24.1076	23.969	26.0163	34.7151	24.5058	24.1509	YDR183W
chrIV	830388	831612		44.3	51.9526	36.4133	35.6454	36.9383	49.7175	39.2111	37.5523	YDR184C
chrIV	831728	832585		37.42	38.7798	22.3113	30.793	31.4626	38.1545	28.7982	28.5458	YDR185C
chrIV	832735	835682		46.12	50.8168	82.2163	69.113	36.5293	56.8128	68.004	69.2309	YDR186C
chrIV	836371	838225		74.09	95.2361	59.1663	59.296	73.3996	99.6874	45.8707	45.5916	YDR188W
chrIV	838326	840487		26.88	29.2925	25.4252	22.2013	23.8355	27.9407	22.1893	23.0254	YDR189W
chrIV	840500	842054		60.16	68.9992	50.5514	49.2812	55.5956	72.5973	49.5194	45.8509	YDR190C
chrIV	842291	843557		15.91	16.6529	19.1132	19.2736	17.7282	19.4694	18.7427	17.214	YDR191W
chrIV	843474	844938		16.06	19.0226	19.3929	17.2954	14.4842	19.9975	14.3917	14.0011	YDR192C
chrIV	845796	847978		50.58	62.5274	65.1605	52.67	45.7301	74.4633	60.2001	56.5688	YDR194C
chrIV	848358	850275		24.64	26.8432	29.823	28.4457	20.617	37.6669	28.0771	28.7409	YDR195W
chrIV	850189	850999		19.62	26.4626	29.1474	28.2102	25.5058	35.4305	28.6882	26.3963	YDR196C
chrIV	851193	852527		18.27	23.8811	27.9951	27.2065	19.084	29.7965	26.0693	27.0001	YDR197W
chrIV	852490	854024		20.58	20.697	32.4451	30.7308	15.591	20.9938	26.2871	33.4648	YDR198C
chrIV	854145	856170		14.65	17.2683	14.8232	14.8731	14.9461	20.568	15.1364	15.3576	YDR200C
chrIV	856268	856964		17.8	18.4766	15.1651	17.3475	20.6724	23.0047	18.6619	15.5462	YDR201W
chrIV	856864	857982		15.86	18.3105	20.2872	20.4255	15.8128	22.8299	19.5254	19.2655	YDR202C
chrIV	858095	859251		12.94	16.0593	16.2842	20.2487	17.94	23.1444	15.8547	16.923	YDR204W
chrIV	859312	861617		16.35	19.891	20.0738	20.7245	16.4938	20.461	18.1168	19.5181	YDR205W
chrIV	861705	864938		27.39	28.4617	28.2246	27.8309	22.4453	31.3037	29.4166	26.4101	YDR206W
chrIV	864816	867588		15.27	21.8389	12.1916	15.5098	14.9743	20.1768	13.8051	11.583	YDR207C
chrIV	868053	870698		44.72	50.1914	49.2596	45.3139	41.2423	50.1861	45.9082	41.2283	YDR208W
chrIV	871040	871484		81.1	95.4431	74.921	74.7359	81.6721	83.2381	67.6267	78.3491	YDR210W
chrIV	884646	887020	1_RiBi	37.9	44.5814	50.3854	45.6835	33.0785	38.9176	43.5654	40.8231	YDR211W
chrIV	887146	888998		44.96	59.8021	36.1599	35.9991	40.8453	44.2963	36.5766	34.7989	YDR212W
chrIV	889530	892732		33.05	42.829	21.2075	20.6607	36.6611	44.5574	29.564	23.5745	YDR213W
chrIV	892732	894023	4_HSF1	51.31	116.175	13.0031	15.1846	67.0975	176.306	20.23	17.6401	YDR214W
chrIV	894508	899220		7.046	32.1782	3.86202	4.61767	12.8258	25.3514	8.98701	6.16893	YDR216W
chrIV	899281	903535		17.35	20.5743	13.6876	13.4763	14.1589	21.1858	18.507	14.5963	YDR217C
chrIV	905038	907097		23.84	28.0575	17.9316	16.7477	27.1315	34.562	25.8319	18.6936	YDR219C
chrIV	907299	909683		30.33	37.6893	20.1659	20.5511	32.9094	39.157	23.301	18.8037	YDR221W
chrIV	914198	914744		442.8	441.328	241.197	384.906	474.673	222.102	435.51	417.61	YDR224C
chrIV	915406	916088		431.8	396.744	320.182	437.923	477.483	179.655	464.653	464.022	YDR225W
chrIV	916415	917282		92.9	83.5719	73.9816	72.1831	94.8948	65.5678	69.7415	64.3127	YDR226W
chrIV	917444	921839		17.71	20.4289	17.4111	16.7483	14.527	24.6593	18.7077	16.2669	YDR227W
chrIV	921852	923894		29.92	32.8146	25.3537	25.6626	27.7163	43.6105	34.4146	28.432	YDR228C
chrIV	924682	926201		23.43	28.2302	20.7459	23.0503	25.0053	33.7896	24.7406	19.8553	YDR229W
chrIV	926136	926940		22.19	29.1261	14.8706	20.366	34.899	56.5029	21.9319	17.9236	YDR231C
chrIV	927190	929274		46.3	55.3288	49.7432	47.6821	44.6122	64.9462	45.664	40.0824	YDR232W
chrIV	929321	930427		150.2	118.383	120.49	133.281	142.241	136.818	219.787	193.281	YDR233C
chrIV	930923	933320		38.18	39.5619	36.6813	38.0141	33.1672	37.5584	45.2022	37.2339	YDR234W
chrIV	933471	935221		21.42	24.4824	22.8211	22.2349	21.6383	28.0323	32.9416	25.326	YDR235W
chrIV	935139	935915		22.77	27.7513	23.8321	25.0938	26.3651	33.3631	28.1344	24.3903	YDR236C
chrIV	936471	937612		23.36	27.9752	24.1923	26.0933	26.6485	38.5825	32.1224	27.8495	YDR237W
chrIV	937616	940874		44.68	50.5498	43.5376	40.4737	43.2174	49.6749	42.2185	39.8695	YDR238C
chrIV	940978	943443		15.08	19.3147	15.6067	17.306	14.8277	21.7857	18.5775	17.24	YDR239C
chrIV	943614	945170		21.48	22.0824	19.2333	20.4009	16.5177	21.0552	20.8876	21.646	YDR240C
chrIV	946698	948597		16.24	19.9633	27.0974	24.1204	14.2829	23.8698	19.9805	21.7244	YDR242W
chrIV	948499	950314		18.33	22.9759	20.535	21.2765	15.795	27.946	24.4416	22.5795	YDR243C
chrIV	950536	952595		17.2	21.9166	22.0581	20.066	19.0714	26.1137	23.8914	25.4545	YDR244W
chrIV	952714	954131		58.41	57.1678	53.613	49.7712	53.9927	57.3993	50.0401	47.9393	YDR245W
chrIV	954251	955097		34.93	46.3213	25.8041	36.1286	41.2528	60.275	28.5864	31.7148	YDR246W
chrIV	955709	957788		18.82	22.701	18.5138	18.2554	19.2094	44.9332	19.8025	21.0463	YDR247W
chrIV	957654	958436		11.49	17.3075	26.5896	27.654	19.9888	38.1088	25.002	32.051	YDR248C
chrIV	958563	959858		21.01	23.6614	27.3529	29.6873	18.7374	32.8921	26.875	29.78	YDR249C
chrIV	960303	963307		22.81	26.2936	27.9184	26.9283	24.4892	37.5032	23.2526	22.9365	YDR251W
chrIV	963402	964451		19.61	22.7853	24.1054	22.1649	17.5724	23.8919	13.65	20.373	YDR252W
chrIV	965024	967001		15.17	20.7335	12.7113	12.4153	15.5947	34.5133	13.1248	12.5676	YDR254W
chrIV	966328	967865		16.78	22.2788	13.2379	13.9229	19.1984	36.8872	15.7202	14.2408	YDR255C
chrIV	969672	971476		32.91	41.7749	37.2769	28.451	29.4965	60.5776	32.1887	32.6168	YDR257C
chrIV	971698	974275	4_HSF1	28.13	57.7861	13.7651	14.7823	44.5257	238.427	11.6823	15.2771	YDR258C
chrIV	974486	975986		22.91	38.2667	28.4945	27.6903	39.2786	119.015	16.9777	15.9054	YDR259C
chrIV	976373	977287		42.33	58.0206	51.0141	60.2548	46.387	61.7315	34.3439	37.5043	YDR260C
chrIV	977398	979308		31.05	39.166	46.9061	46.8789	31.5013	44.4988	27.5848	28.0858	YDR261C
chrIV	995765	998427		30.36	30.6955	36.6023	31.2069	27.9002	33.2725	29.2544	26.0717	YDR264C
chrIV	998641	1000056		23.17	25.0486	19.9257	20.2147	21.5328	26.8434	20.3214	19.3703	YDR265W
chrIV	999980	1002237		33	34.3291	52.1022	43.2941	29.0753	28.4333	39.6941	40.2411	YDR266C
chrIV	1002315	1003571		30.15	35.3159	35.0916	33.4102	30.9881	25.6987	29.6068	29.4199	YDR267C
chrIV	1003929	1005246		43.81	45.544	37.8336	37.3165	40.6447	30.5835	34.6756	32.3261	YDR268W
chrIV	1005571	1008750		27.59	30.6879	50.9281	30.8606	31.7333	28.1616	37.6058	33.3964	YDR270W
chrIV	1008924	1009887		25.47	29.2362	29.7682	29.121	27.7989	29.8306	32.552	29.8305	YDR272W
chrIV	1012120	1013363		62.86	59.7452	42.8772	45.4389	53.1359	67.4643	110.801	93.4404	YDR275W
chrIV	1013252	1013716		139.1	116.836	82.7379	108.16	203.62	122.766	156.96	150.497	YDR276C
chrIV	1014207	1015858		15.97	24.4551	10.1505	9.54986	33.9498	64.4222	14.7793	10.5237	YDR277C
chrIV	1019288	1020502		26.3	28.1583	18.4105	19.1721	23.5482	25.1352	23.8678	22.003	YDR279W
chrIV	1020604	1021772		59.5	63.4865	52.0556	48.1542	49.2856	49.7097	51.347	48.2571	YDR280W
chrIV	1021802	1022426		62.43	29.4738	25.4027	17.9436	14.3973	16.4421	18.1411	18.1695	YDR281C
chrIV	1023168	1024760		10.02	11.489	13.5736	12.5138	9.65308	11.4698	11.4536	11.338	YDR282C
chrIV	1024910	1030275		16.78	21.3356	24.0854	22.7606	14.992	24.0842	29.3086	24.361	YDR283C
chrIV	1030461	1031706		26.79	33.6853	46.1238	41.6363	32.1786	37.8594	46.0948	42.4428	YDR284C
chrIV	1035951	1036959		12.01	14.7001	16.2889	17.1075	14.6901	19.2004	18.182	16.2086	YDR287W
chrIV	1037139	1038270		21.26	25.5472	20.7391	21.4516	21.0838	30.7115	24.3206	21.6568	YDR288W
chrIV	1038095	1039578		24.1	28.6356	31.9247	29.2402	24.6689	31.5477	32.4466	32.2683	YDR289C
chrIV	1039727	1043176		15.09	19.0695	19.0666	18.2206	14.0954	21.2517	17.7836	16.7995	YDR291W
chrIV	1043088	1045172		28.52	33.7862	29.542	28.394	25.3467	32.4688	34.7108	31.1744	YDR292C
chrIV	1045396	1049517		31.99	44.9183	83.3019	68.2523	34.4179	46.6477	55.1898	48.9727	YDR293C
chrIV	1050406	1052304		24.08	34.7109	56.9264	49.197	29.0694	35.5219	49.1395	49.6273	YDR294C
chrIV	1052536	1054908		14.48	19.0385	21.5416	20.6948	13.2263	16.8859	22.2252	20.5689	YDR295C
chrIV	1055157	1055967		41.59	51.3099	42.206	45.247	54.314	60.2408	46.9842	48.5698	YDR296W
chrIV	1056431	1057764		32.14	37.1619	37.8187	34.6252	32.0835	45.4095	47.6201	47.1457	YDR297W
chrIV	1057997	1058992		51.67	60.4414	25.8697	27.3692	80.0937	62.7863	31.2008	25.2522	YDR298C
chrIV	1059565	1061489	1_RiBi	62.88	79.8056	47.441	44.5684	47.6496	69.2653	53.4273	50.3602	YDR299W
chrIV	1061412	1062873		41.58	46.9048	35.8616	35.6697	35.3221	44.9938	34.6968	34.7313	YDR300C
chrIV	1063275	1067475		18.66	23.0342	23.3988	22.4078	18.4986	27.7418	21.3737	20.0102	YDR301W
chrIV	1067658	1068470		19.6	22.1901	16.5538	17.9724	25.4893	26.4426	21.2252	21.2358	YDR302W
chrIV	1068619	1071701		28.29	28.9747	24.558	21.9571	25.1006	28.3157	28.4021	25.8139	YDR303C
chrIV	1071808	1072611		37.2	47.079	36.9668	44.4968	47.0947	57.0968	36.8217	34.5887	YDR304C
chrIV	1073659	1075227		18.22	20.0114	15.3693	16.7488	15.4327	23.5884	17.7389	16.9741	YDR306C
chrIV	1075804	1078005		15.14	17.5214	14.2513	13.5606	14.8446	26.6575	14.964	13.8456	YDR307W
chrIV	1077867	1078488		30.07	32.1638	29.3309	33.7467	34.9258	35.5119	34.1981	34.4415	YDR308C
chrIV	1078682	1080247		76.07	64.781	79.4367	92.4498	76.6884	83.6511	83.7429	70.6489	YDR309C
chrIV	1080920	1084518		35.73	38.8391	30.6638	31.1466	29.7343	34.8385	24.117	27.3647	YDR310C
chrIV	1085055	1087094		27.62	25.9104	41.8495	34.8838	23.5468	24.9611	29.7769	34.0502	YDR311W
chrIV	1087530	1089078	1_RiBi	35.24	40.5276	29.397	28.8236	23.3429	31.6432	28.9707	28.739	YDR312W
chrIV	1089017	1090111		23.8	33.8476	26.4339	24.195	23.3618	49.0556	22.7314	22.6103	YDR313C
chrIV	1092674	1093631		19.78	22.6625	17.6894	20.9886	27.6123	25.9265	22.4553	20.4226	YDR315C
chrIV	1093734	1095250		23.73	26.7993	31.1523	30.4381	22.9164	27.9275	26.4687	27.4579	YDR316W
chrIV	1103740	1105073		24.39	29.1317	26.6348	24.948	26.1989	37.0535	25.5677	25.57	YDR318W
chrIV	1104926	1105904		24.31	27.5066	30.284	27.9002	28.4763	30.7448	26.939	29.6072	YDR319C
chrIV	1106017	1108126		23.2	24.598	22.737	22.105	21.0041	26.1436	19.501	21.3472	YDR320C
chrIV	1108199	1108519		51	53.1524	21.8185	33.4131	72.732	57.2714	37.899	32.5359	YDR320C-A
chrIV	1108659	1109936		36.9	41.6442	27.6465	28.5467	26.7709	37.3144	24.7374	28.2494	YDR321W
chrIV	1110561	1111787		25.96	30.7433	24.9561	23.8755	29.3505	34.5988	24.0961	24.2995	YDR322W
chrIV	1111794	1112340		44.26	53.9894	41.3851	39.7663	82.6741	57.7553	38.1404	40.178	YDR322C-A
chrIV	1112279	1114053		18.63	22.9525	19.6423	18.7135	33.1195	27.9647	20.6209	20.5656	YDR323C
chrIV	1114250	1116763	1_RiBi	46.32	49.441	44.6102	41.9839	34.3624	35.0518	43.8935	42.7858	YDR324C
chrIV	1117115	1120309		17.92	21.4229	18.4695	18.3406	15.8204	20.4998	18.1778	17.2118	YDR325W
chrIV	1120512	1125124		22.73	25.7539	41.3986	36.3958	20.2417	28.3507	34.7144	36.4924	YDR326C
chrIV	1125239	1126094		30.33	41.4931	36.7266	44.178	38.8747	42.7105	32.168	36.8502	YDR328C
chrIV	1126034	1127622		20.49	25.8816	18.0535	21.6608	23.8312	33.3839	19.2074	21.5922	YDR329C
chrIV	1127792	1129454		15.73	25.2995	16.4725	19.3378	18.8971	33.8974	15.056	15.77	YDR330W
chrIV	1129468	1130898		35.46	34.1179	33.2107	31.6148	34.8422	34.684	30.9829	37.1283	YDR331W
chrIV	1130974	1133170		16.05	18.6755	19.5859	20.1607	16.7089	20.323	18.538	21.1568	YDR332W
chrIV	1133042	1135466		26.22	34.2669	27.4228	24.9584	24.4176	41.1911	28.1559	24.1263	YDR333C
chrIV	1135766	1140570		35.4	50.6089	27.5124	26.2267	31.4103	40.2205	26.1598	25.018	YDR334W
chrIV	1140795	1144933		27.56	34.9823	25.3108	22.9472	28.4611	35.687	28.9312	23.8544	YDR335W
chrIV	1145067	1146145		35.83	38.8459	32.972	36.2082	47.2821	34.0481	43.3073	43.8531	YDR336W
chrIV	1146254	1147230		32.56	34.5502	24.1226	26.8767	37.3971	39.009	36.3628	30.7833	YDR337W
chrIV	1147242	1149523		17.66	21.0961	21.7691	22.1378	15.8922	31.3846	21.3909	18.0059	YDR338C
chrIV	1149843	1150558		60.68	59.9078	49.6933	55.2345	63.699	54.7457	66.6519	55.5534	YDR339C
chrIV	1151636	1153716	1_RiBi	56.56	56.85	51.8318	48.6141	46.7079	37.2072	52.3052	49.6435	YDR341C
chrIV	1154071	1156017		20.11	44.7294	8.24467	9.2663	71.9272	178.062	13.2944	13.4744	YDR342C
chrIV	1159563	1161402		19.43	44.2697	8.01418	9.09543	66.5218	166.322	12.6527	12.8965	YDR343C
chrIV	1162810	1164690		81.37	117.857	17.2465	22.8017	106.462	131.969	27.8387	30.6846	YDR345C
chrIV	1166935	1168880		48.76	59.941	40.986	40.1435	41.6934	46.2811	48.4016	44.1396	YDR346C
chrIV	1169059	1170260		34.96	40.2914	29.9846	34.8508	38.3852	36.2129	32.5504	31.353	YDR347W
chrIV	1170126	1171963		34.57	38.1506	27.6244	26.1585	28.9535	22.5191	24.0181	23.1606	YDR348C
chrIV	1172262	1174283		32.93	37.4367	31.6914	31.6986	27.4461	29.46	25.6265	23.8674	YDR349C
chrIV	1176048	1178200		19.89	24.2331	38.6853	36.046	20.2668	21.4994	32.2328	28.3173	YDR350C
chrIV	1178443	1181404		29.32	35.9155	59.322	53.0825	24.7135	28.2453	44.8131	37.5917	YDR351W
chrIV	1181621	1182987		37.87	43.9305	29.7422	32.578	38.8309	35.7267	39.8084	33.7865	YDR352W
chrIV	1183205	1184325		81.25	77.4849	55.0822	73.2493	126.263	57.7616	78.131	79.6524	YDR353W
chrIV	1184619	1185948		30.41	31.4784	21.3407	25.0564	39.8914	29.2658	29.5916	26.1644	YDR354W
chrIV	1185993	1189181		22.29	26.0503	13.6128	12.751	23.8815	30.8469	17.9772	14.0031	YDR356W
chrIV	1189100	1189736		29.22	26.7397	18.2331	21.2535	37.0857	27.1504	28.1896	25.0598	YDR357C
chrIV	1190005	1191894		12.54	15.5061	13.9104	16.1032	14.2456	30.5653	17.8722	14.8646	YDR358W
chrIV	1191859	1195197		29.29	29.8894	41.7996	41.0791	26.3003	33.1981	35.8874	37.8336	YDR359C
chrIV	1195158	1196308		53.14	59.2799	37.4767	38.0602	46.1017	40.8323	39.8616	41.1113	YDR361C
chrIV	1196625	1198805		15.95	19.1529	13.8238	17.9569	14.4755	16.9318	13.8335	14.7344	YDR362C
chrIV	1199001	1201510		15.1	18.0272	23.9453	24.924	13.5101	15.2041	22.1609	26.625	YDR363W
chrIV	1202087	1202545		62.57	72.0915	21.4653	28.3005	62.5885	51.1059	27.2449	25.4873	YDR363W-A
chrIV	1202493	1204231		30.74	37.1246	26.2974	26.3851	27.2721	30.2649	22.9636	27.6549	YDR364C
chrIV	1204402	1206467		44.82	56.1758	42.6301	41.9311	31.7472	37.2033	37.8596	41.9804	YDR365C
chrIV	1212790	1213650		26.27	28.3512	28.2315	28.3968	29.0838	26.8047	29.8231	30.7024	YDR367W
chrIV	1213817	1215005		19.23	25.1414	24.2483	23.5207	21.4446	30.3544	17.2761	19.7341	YDR368W
chrIV	1214946	1217601		10.48	12.8925	14.8528	16.056	10.6349	13.7173	12.2998	15.2515	YDR369C
chrIV	1217725	1219122		28.77	29.1891	25.9575	28.3154	28.184	28.2772	27.3992	28.0003	YDR370C
chrIV	1219333	1221046		13.68	15.5474	17.474	17.9469	15.0647	17.5118	16.9931	19.3134	YDR371W
chrIV	1220967	1222463		36.03	37.4509	48.5782	43.2526	43.5389	37.9062	46.6488	49.2863	YDR372C
chrIV	1222644	1223411		29.78	33.853	32.7437	30.6317	34.5183	34.6558	30.6117	34.9239	YDR373W
chrIV	1224728	1225254		18.38	19.7505	21.0421	20.6344	22.8948	20.467	20.4257	17.7759	YDR374W-A
chrIV	1225105	1226555		18.46	21.4745	21.6016	19.4566	20.2632	24.5723	16.7958	18.0216	YDR375C
chrIV	1226757	1228339		16.36	19.0947	19.2376	18.7045	22.0604	25.6602	17.1087	18.7683	YDR376W
chrIV	1228514	1229320		64.51	60.4746	39.2992	40.3034	99.7355	61.1732	42.2465	46.4665	YDR377W
chrIV	1229138	1229625		47.37	44.2155	36.2405	43.5416	51.101	39.5431	37.571	39.5659	YDR378C
chrIV	1230100	1233201		17.34	19.8111	32.0372	25.7679	18.8997	24.9422	26.8309	28.5783	YDR379W
chrIV	1233110	1233751		14.95	17.7982	35.0983	27.2282	58.2908	51.6809	89.332	81.0479	YDR379C-A
chrIV	1234097	1236250		40.55	44.5372	144.504	71.5982	109.976	115.541	308.449	291.676	YDR380W
chrIV	1236459	1238196		240.3	206.405	231.114	218.274	232.621	161.123	180.127	205.048	YDR381W
chrIV	1238182	1239120		30.53	30.6479	43.6348	43.1885	37.5246	36.261	35.7253	40.0895	YDR381C-A
chrIV	1239409	1239970	2_RPG	326	158.963	306.106	350.08	311.36	94.5827	320.973	362.031	YDR382W
chrIV	1239879	1240701		71.12	50.7937	78.898	70.072	72.101	48.1458	77.3124	82.7565	YDR383C
chrIV	1241041	1242174		34.99	27.8434	27.4156	36.779	23.2312	20.8484	29.508	28.044	YDR384C
chrIV	1243121	1245910	1_RiBi	222.5	150.141	301.779	283.545	198.26	83.9775	215.361	245.262	YDR385W
chrIV	1246071	1248125		12.81	14.6639	13.1281	12.494	12.1567	13.5039	11.5994	11.4381	YDR386W
chrIV	1248046	1249965		14.89	17.7554	20.1236	19.8199	16.9401	26.6723	18.5014	17.6154	YDR387C
chrIV	1250133	1251756		25.84	33.9693	34.3389	32.6987	33.0029	46.9377	28.9159	26.1061	YDR388W
chrIV	1252013	1254816		32.07	36.8167	32.343	29.8877	29.7153	46.831	32.855	29.3188	YDR389W
chrIV	1254783	1256874		22.56	25.5226	19.9056	18.391	19.4246	26.471	19.881	17.9834	YDR390C
chrIV	1257237	1258480	3_MSN2	14.2	18.3613	20.1523	21.9798	20.6801	29.7203	21.0067	21.3	YDR391C
chrIV	1259830	1261449		38.63	44.419	35.0926	30.4319	38.4398	52.1428	30.8589	30.7052	YDR393W
chrIV	1261575	1263054		54.27	82.313	28.2319	28.475	57.2359	87.9043	23.2239	23.7268	YDR394W
chrIV	1263188	1266247		49.41	48.8836	55.8691	46.2748	39.1106	45.0014	47.6865	47.8336	YDR395W
chrIV	1266265	1266986		48.33	46.3735	38.605	36.4861	48.8541	37.3288	43.2727	41.2109	YDR397C
chrIV	1267394	1269521	1_RiBi	59.2	65.3674	45.9252	45.7096	47.1912	48.024	39.6914	41.2526	YDR398W
chrIV	1269976	1270846	1_RiBi	166.5	135.433	70.2292	89.3502	198.936	82.3376	80.318	90.9525	YDR399W
chrIV	1270985	1272235		21.53	25.1992	16.0146	19.0232	20.5792	37.2871	17.0624	17.2939	YDR400W
chrIV	1272198	1273744		4.806	8.64121	9.8926	9.71056	5.44675	22.2864	9.03867	9.73378	YDR402C
chrIV	1274558	1276243		5.424	8.33521	16.5602	14.2089	4.84767	22.1962	9.69163	12.1272	YDR403W
chrIV	1276509	1277374		43.49	45.1037	41.4926	41.9703	47.0589	52.2918	41.0446	37.3457	YDR404C
chrIV	1277570	1278573		37.99	49.5382	50.6472	63.3776	53.2515	60.0063	46.6311	60.6954	YDR405W
chrIV	1279078	1283925		8.638	15.7888	15.8506	18.6302	12.5985	20.3524	13.3732	13.1584	YDR406W
chrIV	1283997	1288042		18.84	21.6367	18.7321	16.7625	17.7443	25.0141	17.4121	14.7205	YDR407C
chrIV	1288042	1288942		51.96	60.2754	59.0926	62.4987	65.7187	68.4839	44.0109	48.7239	YDR408C
chrIV	1289365	1292361		20.87	26.0826	27.0434	25.7048	20.33	36.4927	26.531	24.5812	YDR409W
chrIV	1292346	1293159		38.19	45.0745	50.7335	47.9193	51.9486	45.936	52.6699	49.7276	YDR410C
chrIV	1293303	1294442		21.85	25.7358	17.5512	21.6979	25.2269	36.2584	18.5507	16.2699	YDR411C
chrIV	1294624	1295542		43.25	45.3838	27.3707	32.4054	36.536	37.1684	38.0231	32.5332	YDR412W
chrIV	1295416	1296912		21.06	20.8369	18.238	17.4734	20.2156	24.607	20.8104	20.6143	YDR414C
chrIV	1296956	1298214		27.12	25.4952	32.9971	31.6656	31.6505	30.3345	30.7854	32.0237	YDR415C
chrIV	1298367	1301044		40.49	23.5565	49.0336	51.5144	41.7615	20.7308	46.0459	57.3199	YDR416W
chrIV	1301580	1302214	2_RPG	417.7	122.436	444.246	469.406	382.753	50.5376	368.52	412.136	YDR418W
chrIV	1303123	1305434		11.77	12.5272	17.5365	17.7768	12.1675	13.1049	15.5446	16.3794	YDR419W
chrIV	1305984	1311813		29.04	34.7521	65.4439	52.0309	27.8582	29.479	38.3932	38.2129	YDR420W
chrIV	1311962	1315147		11.18	14.1589	24.458	20.7563	13.5934	22.1107	21.8504	21.2979	YDR421W
chrIV	1315033	1317827		24.04	28.5949	32.4213	29.3973	20.8133	33.3631	30.4484	28.3515	YDR422C
chrIV	1317975	1319275		32.41	36.7485	36.4428	34.6753	39.6833	40.9981	29.7656	30.5278	YDR423C
chrIV	1319357	1319896		61.75	58.8205	40.2496	47.9742	95.2495	67.9323	59.0229	51.2156	YDR424C
chrIV	1320012	1322025		17.38	21.6731	15.836	16.8507	18.565	26.4234	18.9791	17.6165	YDR425W
chrIV	1322160	1323484		60.67	80.6803	41.267	38.6703	65.1535	114.907	42.9516	47.5163	YDR427W
chrIV	1323446	1324270		31.5	38.8408	41.5871	40.9493	30.9111	70.1371	32.8199	40.0632	YDR428C
chrIV	1324372	1325341	1_RiBi	95.04	103.307	102.625	102.651	96.6355	86.1414	93.9623	99.5061	YDR429C
chrIV	1325276	1328550		24.76	32.5739	29.8356	29.1178	28.9202	33.9256	29.5368	29.4326	YDR430C
chrIV	1328738	1330453	1_RiBi	146.3	179.393	171.046	154.752	157.224	187.313	137.263	148.148	YDR432W
chrIV	1331139	1332957		17.79	19.4172	24.1039	21.6497	16.6199	18.2345	20.783	18.7582	YDR434W
chrIV	1332818	1333995		11.7	15.1535	6.45907	9.43727	13.7129	18.8984	11.2914	9.03159	YDR435C
chrIV	1334566	1337068	3_MSN2	15.39	17.0686	15.629	19.5097	14.4842	22.6331	16.1461	15.1886	YDR436W
chrIV	1339573	1340829		19.7	21.1304	20.7295	20.7659	17.1076	21.3365	21.1444	20.4362	YDR439W
chrIV	1342389	1344347		19.24	21.0485	15.7643	14.0151	15.2734	23.332	14.974	13.3951	YDR440W
chrIV	1344386	1345209		48.8	45.6448	38.2284	40.9802	39.8041	51.2026	40.503	42.9537	YDR441C
chrIV	1345128	1349966		14.65	15.5405	15.7832	14.3398	15.7989	19.4123	16.6791	15.1988	YDR443C
chrIV	1350196	1352393		20.15	21.8557	13.8616	14.6182	17.0357	22.3948	17.1314	13.4978	YDR444W
chrIV	1354709	1355586	2_RPG	299.5	97.1795	381.486	352.775	272.612	39.8207	321.763	361.465	YDR447C
chrIV	1356038	1357435		35.58	36.5915	48.8477	47.9649	32.8888	45.2796	32.6098	40.6797	YDR448W
chrIV	1357388	1358955	1_RiBi	50.81	46.7917	42.0887	40.9849	39.4022	40.482	48.6261	48.4483	YDR449C
chrIV	1359856	1360916	2_RPG	310.2	104.021	395.228	380.906	303.744	55.6258	320.957	373.259	YDR450W
chrIV	1360905	1362241		50.93	51.333	37.4924	61.0738	55.8274	41.8266	57.3461	54.092	YDR451C
chrIV	1362726	1364940		36.82	38.5342	41.1141	42.6556	38.7751	51.2402	43.8679	41.2253	YDR452W
chrIV	1364986	1365742		22.26	23.0552	19.8396	26.2567	27.3864	26.5834	30.8057	33.387	YDR453C
chrIV	1366158	1366862		49.35	41.7013	41.9113	50.4118	49.2985	37.0314	54.5541	49.3135	YDR454C
chrIV	1367417	1369455		17.61	20.6168	17.9219	18.5238	17.0602	24.2811	20.9265	17.2549	YDR456W
chrIV	1369674	1379673		24.05	29.0539	32.9926	28.8301	22.0181	25.9939	31.0872	28.5369	YDR457W
chrIV	1379878	1382093		23.04	26.4315	36.7157	34.3859	23.6061	36.6358	38.9383	35.6945	YDR458C
chrIV	1382213	1383537		22.66	25.8423	24.3876	27.3385	23.0244	26.4274	25.0649	23.4161	YDR459C
chrIV	1383669	1384916	1_RiBi	41.55	39.9914	64.9897	65.6952	21.8783	26.3813	27.0167	29.3481	YDR460W
chrIV	1385151	1385432		67.96	35.5789	150.236	168.861	1.60548	7.60064	30.6707	35.7752	YDR461W
chrIV	1385353	1385822		20.06	14.4483	33.4632	40.8809	5.90727	12.3897	11.3618	12.8791	YDR461C-A
chrIV	1386009	1386639		45.08	49.1808	41.4594	50.2685	52.9625	70.5745	42.6453	41.8984	YDR462W
chrIV	1386759	1388585		40.89	38.6332	59.6429	56.5789	39.7874	46.0974	51.3668	54.4214	YDR463W
chrIV	1388752	1393245		21.94	25.0475	22.9087	21.5458	17.9469	22.3966	20.7218	20.3114	YDR464W
chrIV	1393154	1394640		30.87	38.8596	21.792	23.9522	21.0794	29.4469	23.7687	24.1731	YDR465C
chrIV	1395005	1397857		22.52	31.8871	27.7731	27.8982	21.4439	53.4713	28.5497	24.8654	YDR466W
chrIV	1397927	1398858		39.91	37.2806	44.3757	42.596	42.6537	42.6009	37.863	41.5979	YDR468C
chrIV	1398973	1399822		30.15	25.5207	35.1156	31.3104	30.1657	27.7541	30.1038	29.8443	YDR469W
chrIV	1399574	1401303		15.89	16.9489	29.5681	27.2581	16.3473	29.9833	19.9384	23.0367	YDR470C
chrIV	1401609	1402682	2_RPG	308.9	105.389	337.016	364.723	328.472	64.2514	314.689	377.944	YDR471W
chrIV	1403195	1404312		69.36	60.8072	53.428	60.6534	56.223	70.9455	57.5997	58.9967	YDR472W
chrIV	1404269	1405920		19.23	19.7677	22.2127	20.7239	17.2024	29.7947	22.2209	22.7291	YDR473C
chrIV	1407350	1410190		17.61	23.6449	25.5797	25.8546	19.6648	32.3646	24.4777	23.4637	YDR475C
chrIV	1410252	1411190	3_MSN2	39.43	46.6782	43.9303	46.7189	58.3727	57.3209	42.5039	41.9104	YDR476C
chrIV	1412077	1414393		29.86	34.2785	28.553	28.5899	31.3317	48.4801	30.5185	27.975	YDR477W
chrIV	1414536	1415237		30.28	29.6422	26.9974	27.6709	25.9126	40.3329	29.1071	29.3639	YDR478W
chrIV	1415125	1416934		22.03	28.215	27.0322	26.7751	23.1639	47.0736	24.3284	21.6487	YDR479C
chrIV	1417332	1418695		21.46	21.5665	25.443	20.0286	23.3054	28.9642	19.5891	19.0201	YDR480W
chrIV	1418439	1420303		36.1	32.3521	56.8709	37.1722	26.0123	46.9608	38.8116	37.4802	YDR481C
chrIV	1420325	1420945		36.21	37.5191	38.4822	35.5781	43.2698	44.4865	34.1534	38.0463	YDR482C
chrIV	1421106	1422598		50.38	44.192	63.639	42.0101	36.9715	40.6693	47.8424	43.1866	YDR483W
chrIV	1422732	1424783		14.58	16.3378	26.6121	25.3935	13.9478	23.4809	25.2022	29.3119	YDR484W
chrIV	1424665	1427248		23.54	27.3422	28.5826	27.8738	21.7557	35.3778	27.0951	27.9829	YDR485C
chrIV	1427313	1428165		31.28	44.5115	33.7476	34.0065	36.1295	51.1696	34.3504	31.9981	YDR486C
chrIV	1428249	1429057		41.28	50.6933	52.5598	51.7421	41.8854	45.5478	40.4072	42.7255	YDR487C
chrIV	1429098	1430790		12.27	18.0025	10.6563	12.3616	14.2258	22.5783	9.96303	10.2054	YDR488C
chrIV	1430992	1432183		26.77	30.5237	24.5968	25.2049	27.0032	37.0825	28.4588	24.5902	YDR489W
chrIV	1431803	1434351		13.28	20.4113	14.9182	15.9756	14.8495	38.494	28.9455	22.9746	YDR490C
chrIV	1434768	1435966		44.29	54.8088	51.5564	47.1124	39.7006	93.0415	189.218	173.426	YDR492W
chrIV	1436098	1436690		29.96	32.1148	35.0858	37.475	40.6172	43.8246	50.2825	43.0517	YDR493W
chrIV	1436864	1438088		30.1	32.507	38.6747	35.1947	32.8458	50.6078	51.4211	39.8812	YDR494W
chrIV	1437919	1441210		13.83	15.2754	18.4365	17.3976	12.4695	23.3806	22.4834	19.0648	YDR495C
chrIV	1441356	1443439	1_RiBi	68.74	78.9104	63.2938	56.7384	44.6629	50.4172	65.9983	60.9496	YDR496C
chrIV	1443607	1445566		82.91	65.5416	43.0358	43.952	117.799	86.6795	44.4047	47.9868	YDR497C
chrIV	1445768	1447035		29.07	31.4732	22.7445	24.933	33.21	39.425	23.5625	23.889	YDR498C
chrIV	1447800	1450188		25.06	21.5473	23.643	21.6768	20.537	24.1508	24.5814	22.969	YDR499W
chrIV	1450105	1450871	2_RPG	278	115.675	355.001	335.273	276.699	71.0752	329.401	360.587	YDR500C
chrIV	1451326	1453059		18.82	15.8001	14.605	16.0186	17.0467	38.759	18.1401	16.2989	YDR501W
chrIV	1453014	1454519		106.1	60.4983	52.8037	27.6936	156.415	141.145	83.2481	64.8003	YDR502C
chrIV	1454828	1455947		29.91	24.4514	11.4596	12.2908	32.7368	34.1229	15.8186	11.8798	YDR503C
chrIV	1456587	1459499		22.1	26.687	28.9642	24.1424	25.3643	33.4057	31.5987	24.1666	YDR505C
chrIV	1459245	1461570		18.23	21.4629	15.0868	18.0229	25.336	24.8199	23.4475	19.0345	YDR506C
chrIV	1462176	1465906		41.03	37.9794	27.5481	26.104	37.8728	35.4923	24.6306	21.0508	YDR507C
chrIV	1466225	1468486		113.8	115.986	75.701	87.5417	98.004	111.632	122.043	109.609	YDR508C
chrIV	1469313	1469837		90.57	83.9867	49.3223	58.7398	106.29	96.618	78.7365	65.8621	YDR510W
chrIV	1469970	1470505		32.83	38.94	43.8027	51.7999	42.2769	40.0127	55.0934	49.3848	YDR511W
chrIV	1470414	1471063		25.07	30.1987	33.3447	39.7108	54.3507	44.1405	54.4463	53.735	YDR512C
chrIV	1470993	1471549		31.01	36.1648	52.0994	64.1526	52.1862	54.5286	81.5362	65.3913	YDR513W
chrIV	1471497	1473058		27.96	32.7248	32.9853	29.3009	25.8701	23.4326	28.2923	30.1468	YDR514C
chrIV	1473200	1474805		21.83	30.6655	12.738	12.1027	20.292	27.611	15.1702	12.6139	YDR515W
chrIV	1474854	1476586		11.26	19.1195	13.1102	18.1381	21.9319	35.7214	12.652	12.4857	YDR516C
chrIV	1477123	1478463		30.65	32.1289	12.9966	17.8937	33.0259	38.0661	18.1664	16.4339	YDR517W
chrIV	1478557	1480211		15.15	17.0539	24.2587	21.3825	10.5051	27.5727	20.6422	19.8062	YDR518W
chrIV	1480354	1481013		41.18	42.9663	26.9771	30.9123	47.7461	40.1581	32.5847	31.9268	YDR519W
chrIV	1480963	1483487		21.19	26.6466	21.9381	20.265	16.6043	32.83	24.2543	20.7857	YDR520C
chrIV	1487269	1489055		32.53	35.0601	29.5361	31.8839	28.8659	36.6057	34.3025	28.8543	YDR524C
chrIV	1489242	1489592		378.4	172.782	151.613	222.079	395.631	368.768	532.105	436.803	YDR524W-C
chrIV	1489440	1489841		796.7	563.584	482.6	675.83	694.498	535.317	647.769	599.152	YDR524C-B
chrIV	1490508	1490898		64.49	66.3641	49.1547	75.1214	104.769	111.112	88.4362	70.5678	YDR525W-A
chrIV	1491027	1492438		49.52	57.8795	36.4114	39.9215	34.7932	67.7845	41.2309	37.7617	YDR527W
chrIV	1494266	1495962		54.46	52.3125	40.878	35.422	50.9803	85.9914	36.8934	37.0394	YDR528W
chrIV	1495971	1496603		75.34	78.4534	55.5921	66.2268	145.604	148.482	112.144	90.0468	YDR529C
chrIV	1496671	1497914		31.42	40.7404	27.7325	30.8909	50.5582	55.7781	37.6976	36.2301	YDR530C
chrIV	1498177	1499417		25.82	31.7067	22.1469	21.7278	20.5704	40.3741	26.9133	21.7922	YDR531W
chrIV	1499353	1500603		20.12	22.0511	19.0388	19.1263	21.9903	30.2965	22.8347	20.4733	YDR532C
chrIV	1501358	1502222	3_MSN2	17.52	26.2741	37.5194	44.7874	17.5641	33.0989	31.2404	32.3356	YDR533C
chrIV	1507788	1509798		8.725	11.4132	8.18733	8.40057	7.83793	17.3421	9.38232	7.54735	YDR536W
chrIV	1519524	1520932		11.27	13.3938	13.4704	15.3343	10.4525	20.4071	12.2008	10.1716	YDR541C
chrIV	1523229	1523700		0.1684	0.525775	0.865563	0.481295	0.241592	1.76739	0.612017	0.599575	YDR542W
chrIV	1525837	1531770		0.137	0.138293	0.128507	0.127441	0.0859464	0.198554	0.104713	0.0912473	YDR545W
chrIX	448	6620		0.893	0.963223	0.70325	0.830739	0.974658	1.06193	0.579759	0.556048	YIL177C
chrIX	8759	9173		0.2996	0.736957	0.817585	0.308986	0.438478	1.96321	0.954952	0.694348	YIL176C
chrIX	11491	16427		12.22	13.325	25.8746	21.082	11.2418	15.649	16.432	18.3061	YIL173W
chrIX	16699	18660		3.47	6.34133	4.18655	4.75001	4.17261	13.6265	5.30052	4.555	YIL172C
chrIX	22895	26159		157.4	119.358	153.944	228.306	176.224	77.1713	145.663	172.012	YIL169C
chrIX	33616	35009		15.26	19.4973	15.6407	18.3262	19.3623	26.5123	13.8347	14.6901	YIL164C
chrIX	37345	39126		11.09	15.9154	15.1874	14.091	14.8536	25.393	13.1441	15.1766	YIL162W
chrIX	39422	40174		28.5	31.4794	31.4436	33.0786	32.3738	30.3307	32.7744	32.9281	YIL161W
chrIX	40207	41478		10.29	13.8115	20.7623	18.5628	9.07415	17.203	12.0391	16.6192	YIL160C
chrIX	41809	46071		22.16	23.8518	10.683	11.5776	24.5776	26.0253	15.1381	14.6954	YIL159W
chrIX	46189	46910		52.77	56.2241	10.02	23.5273	53.8543	34.3043	30.5443	28.7467	YIL158W
chrIX	46740	47575		25.25	27.2454	18.2235	23.2646	28.9719	31.9833	23.7266	23.6945	YIL157C
chrIX	47666	48055		28.76	32.0832	15.0725	22.4059	42.934	45.8377	24.6152	21.3167	YIL156W-B
chrIX	51499	53778		11.62	20.9498	10.9394	14.9174	19.1659	36.5997	15.468	15.3267	YIL155C
chrIX	53910	55072		27.67	41.6083	30.1058	43.3791	44.1972	59.5394	27.3147	30.9048	YIL154C
chrIX	55164	56425		21.05	26.5683	22.8478	28.4688	26.9045	38.025	18.8964	20.3632	YIL153W
chrIX	56528	57382		22.02	27.6891	24.0814	26.4039	26.3455	28.2809	23.5974	26.6339	YIL152W
chrIX	60896	62761		22.93	23.7065	25.4469	24.9334	20.0061	20.2238	22.0591	25.4132	YIL150C
chrIX	62930	68208		28.64	32.1829	39.8445	34.892	25.0692	33.6348	39.5217	38.6531	YIL149C
chrIX	68681	69594	2_RPG	366.6	106.55	410.561	401.794	340.114	50.1706	367.028	396.657	YIL148W
chrIX	69500	73668		30.61	24.2336	37.1078	33.4369	24.2442	18.7392	31.5334	34.4391	YIL147C
chrIX	74077	75945		11.77	18.0141	18.3095	17.6152	8.47347	22.3493	20.7316	17.0605	YIL146C
chrIX	75930	77355		39.25	43.4382	31.8908	34.8057	35.245	34.4042	36.1286	35.0624	YIL145C
chrIX	77993	80377		30.15	30.2875	32.3556	30.4975	28.3692	29.7609	33.4058	29.0588	YIL144W
chrIX	80287	83077		25.1	32.8514	25.1862	26.7757	22.4055	29.4163	26.5049	24.3371	YIL143C
chrIX	83264	84939		79.51	102.283	66.1572	65.1014	77.1664	73.2802	47.6799	49.1463	YIL142W
chrIX	85215	87885		27.36	29.5181	28.3096	28.1362	28.3118	37.6069	23.6915	20.1813	YIL140W
chrIX	87878	88736		22.16	22.198	28.8582	28.9921	19.8293	22.1905	28.5728	28.3976	YIL139C
chrIX	88878	89744		46.79	47.894	57.4853	54.9703	52.4215	40.1097	72.8433	70.2704	YIL138C
chrIX	89878	92836		20.89	21.911	26.7724	27.4224	18.8233	18.7399	27.2881	24.3157	YIL137C
chrIX	93574	94885		18.13	21.4665	23.1888	32.2869	32.1774	32.356	27.0709	31.1921	YIL136W
chrIX	94921	96432		30.35	33.0315	32.8232	36.876	31.1191	32.1822	27.9535	29.0532	YIL135C
chrIX	97334	98505		64.06	48.8606	70.0484	76.1325	56.6094	35.6665	72.2202	84.0369	YIL134W
chrIX	98426	99433	2_RPG	316.5	92.1151	323.689	327.274	290.442	35.1213	302.257	350.842	YIL133C
chrIX	99703	100561		27.48	15.3594	28.455	42.6899	32.9384	18.8225	26.6168	35.634	YIL132C
chrIX	100718	102328		21.96	21.1616	11.9616	15.1032	21.0663	18.0673	13.3267	13.6342	YIL131C
chrIX	102630	105760		39.88	37.3734	47.4936	42.6768	33.0093	30.9169	55.1444	49.1486	YIL130W
chrIX	106022	113344		16.01	20.8492	20.6159	19.0712	13.8783	18.4748	18.2259	16.7033	YIL129C
chrIX	113721	116950		27.8	36.9808	30.033	28.0968	24.6351	43.3975	35.2034	30.1072	YIL128W
chrIX	116990	117683		55.61	58.0844	30.8166	34.7215	41.4653	37.1879	40.1562	34.3359	YIL127C
chrIX	117909	122207		42.4	44.7718	36.1308	31.3627	37.4471	34.3223	36.9109	32.7633	YIL126W
chrIX	122394	125819		23.2	31.1267	21.8195	24.1296	37.3436	37.1116	24.2244	21.8522	YIL125W
chrIX	126145	127199		33.14	38.976	28.4719	42.3267	43.7939	39.9481	35.0888	35.4859	YIL124W
chrIX	127661	129919		65.31	69.7718	92.7628	113.582	73.6439	70.6072	68.1482	67.1951	YIL123W
chrIX	130307	131818		14.19	23.0634	37.6835	39.0132	17.224	29.4168	28.2571	31.6079	YIL122W
chrIX	132218	133999		13.06	17.4693	23.9111	21.6783	7.60309	23.0687	12.5106	11.289	YIL121W
chrIX	134298	136199		36.47	39.9563	21.2216	25.6565	50.1403	45.6414	30.3872	27.567	YIL120W
chrIX	136408	137903		24.5	27.1336	24.1708	31.3237	42.1023	67.7954	37.8218	40.015	YIL119C
chrIX	139601	140489		54.5	62.183	46.8655	47.1686	51.8884	63.4288	45.9699	40.0929	YIL118W
chrIX	140536	141634		31.04	39.6788	186.307	161.7	17.1809	36.4772	81.449	77.8164	YIL117C
chrIX	142842	144180		25.81	31.3386	45.7536	39.5543	37.528	40.7378	36.5323	34.0518	YIL116W
chrIX	144264	148888		26.3	30.0405	36.0457	34.6496	21.2078	27.9631	32.8976	31.3114	YIL115C
chrIX	149130	150020		20.34	30.1654	27.2337	32.6285	18.345	33.6437	25.4422	24.7515	YIL114C
chrIX	150526	151293		11.78	17.0406	20.5739	25.9737	11.3021	21.5866	16.5565	15.5921	YIL113W
chrIX	151550	154935		24.91	33.4619	36.9183	38.0503	25.7964	46.884	54.6314	46.4792	YIL112W
chrIX	155151	155799		35.99	43.5827	54.0248	74.7241	46.4742	77.9292	133.591	96.8317	YIL111W
chrIX	156013	157291		32.55	35.2666	26.4244	27.8007	24.4015	42.2851	32.8104	27.0193	YIL110W
chrIX	157270	160272		46.32	52.9802	53.1618	47.8511	42.7529	53.8524	33.6852	32.3318	YIL109C
chrIX	160672	163050		25.9	32.797	49.7906	42.3237	28.5948	41.7392	30.6092	30.8736	YIL108W
chrIX	162885	165942		9.85	14.1917	30.6296	26.8886	12.7922	28.8916	23.0909	19.2283	YIL107C
chrIX	166398	167527		42.52	43.1328	33.6009	41.9703	46.7882	44.8901	46.3807	41.0172	YIL106W
chrIX	167412	169781		25.76	31.1474	20.529	21.4911	24.2011	46.6585	22.5074	20.3544	YIL105C
chrIX	169906	171558	1_RiBi	29.1	30.9915	26.7251	26.6587	22.2005	29.5087	25.531	27.3232	YIL104C
chrIX	171661	173102		34.03	40.9917	28.4788	27.7432	24.6622	36.9576	26.6135	27.1682	YIL103W
chrIX	175288	177451		6.264	10.4576	11.1791	14.8781	11.9478	27.956	9.17955	11.7824	YIL101C
chrIX	177978	179663		3.718	5.90671	7.66658	8.83636	5.03916	11.5978	5.70754	7.14941	YIL099W
chrIX	179681	180281		24.15	27.4765	21.6005	25.6002	31.096	38.9815	28.0454	25.6163	YIL098C
chrIX	180400	182069		8.449	11.9233	9.18324	11.4249	10.507	18.3859	12.4271	12.1051	YIL097W
chrIX	181975	183192		19.04	23.851	12.9138	14.9111	14.0018	20.0793	21.8142	18.3493	YIL096C
chrIX	183767	186444		17.47	21.4056	19.1413	18.1097	16.175	33.7786	21.7612	18.134	YIL095W
chrIX	186308	187673		52.67	56.9639	67.8763	58.228	53.3031	48.7314	66.1724	58.9838	YIL094C
chrIX	187890	188946		56.9	62.9184	44.9751	53.4686	71.1183	57.8733	50.0668	48.9508	YIL093C
chrIX	189011	191083		18.78	24.6844	20.2024	21.036	14.8572	27.8184	21.3466	21.6753	YIL092W
chrIX	190991	193243	1_RiBi	44.82	56.3517	43.7096	42.9325	32.0034	44.3186	44.2846	41.1219	YIL091C
chrIX	193456	195429		31.95	33.6282	32.473	33.6336	28.3437	32.7852	35.6583	33.6221	YIL090W
chrIX	197839	199483		15.65	18.9821	17.5534	17.3411	17.6441	25.8494	19.3236	15.9847	YIL088C
chrIX	199567	200192		17.1	22.313	21.003	26.8368	28.7182	37.6984	24.8779	22.0835	YIL087C
chrIX	200437	202115		32.48	35.0239	38.4818	34.9004	27.6472	29.4172	39.1677	34.5744	YIL085C
chrIX	202242	203300		46.75	52.2226	45.74	49.903	49.157	46.1058	54.9987	49.8172	YIL084C
chrIX	203458	204757		25.53	33.1656	29.4776	30.9855	23.7906	29.7183	42.7839	35.7422	YIL083C
chrIX	210822	212135		40.02	43.296	28.4166	31.3112	30.5573	29.339	31.4997	29.231	YIL079C
chrIX	212433	214778		92.67	91.6583	72.583	69.4166	69.8033	69.9341	70.5987	66.5723	YIL078W
chrIX	216616	217803		47.09	55.0701	57.6596	51.2457	49.7798	57.3591	49.5388	44.5112	YIL076W
chrIX	217765	220761		65.06	98.1088	43.1703	35.8987	61.8698	96.409	35.4043	30.6328	YIL075C
chrIX	221027	222623		39.26	39.8527	29.9875	27.7289	32.1171	45.5593	32.5565	27.1476	YIL074C
chrIX	228431	230026		14.92	14.9517	24.4565	26.6989	15.6389	19.9131	31.7703	30.3271	YIL071C
chrIX	230147	231149		38.47	39.2037	36.358	39.3997	41.1502	37.1881	40.0789	41.2545	YIL070C
chrIX	231372	232413	2_RPG	316.2	108.544	370.71	363	291.102	46.0109	304.214	347.09	YIL069C
chrIX	233023	235532		21.49	17.7896	30.5918	30.861	18.9729	17.5617	29.4966	29.6971	YIL068C
chrIX	235640	237818		12.87	13.3493	12.199	13.3034	12.5466	12.8391	12.0803	12.3988	YIL067C
chrIX	238015	240755		3.588	6.21987	16.0489	12.8101	4.841	18.1872	10.9117	18.9731	YIL066C
chrIX	241232	241865	3_MSN2	16.46	20.3864	12.7735	20.1817	24.2195	28.933	16.2039	17.364	YIL065C
chrIX	241942	242796		30.18	31.7759	20.4283	28.3315	23.9881	23.3717	22.1729	24.5792	YIL064W
chrIX	242724	243791		39.98	44.2706	41.8183	41.7383	42.1181	39.3141	35.8122	43.1975	YIL063C
chrIX	243916	244499		57.97	67.7528	34.9944	42.7545	68.5151	62.2599	40.0252	38.9838	YIL062C
chrIX	244446	245577		26.05	27.1741	16.5502	20.9087	29.617	22.5313	19.952	19.6012	YIL061C
chrIX	246276	246540		4.005	4.72265	3.34322	3.33269	2.58572	3.31996	3.11277	4.21697	YIL060W
chrIX	247900	248468		2.58	3.60132	4.78067	6.11548	3.22319	4.43155	5.03153	6.57504	YIL057C
chrIX	249652	251971		39.39	47.5403	49.2185	50.8193	47.6011	51.8745	57.5145	63.4349	YIL056W
chrIX	255081	256027		340.5	366.106	401.486	323.735	221.188	183.805	240.253	261.746	YIL053W
chrIX	256176	257093	2_RPG	318.2	109.017	365.581	380.775	307.395	56.0803	318.23	397.111	YIL052C
chrIX	257725	258368		136.1	97.93	235.187	257.905	186.904	111.18	231.256	271.954	YIL051C
chrIX	258792	259789		36.86	34.1656	34.8809	42.4845	38.0918	39.8341	38.6619	38.5955	YIL050W
chrIX	260151	260989		30.2	26.3042	51.8406	48.4601	32.2126	23.8362	41.9841	46.2229	YIL049W
chrIX	261131	265018		27.37	32.3899	35.6985	31.8265	23.6956	31.2359	35.146	32.6361	YIL048W
chrIX	265030	267860		56.99	48.9669	69.538	65.8253	41.5256	40.7064	43.1868	52.2055	YIL047C
chrIX	268650	270682		28.68	32.0781	36.8479	32.6715	26.8566	36.3649	21.0314	25.2406	YIL046W
chrIX	270879	272781		9.052	11.8588	15.429	16.8456	13.3252	16.9657	15.668	18.7476	YIL045W
chrIX	272834	273871		26.07	28.4185	34.0979	36.2154	27.1087	34.5452	35.3027	39.5165	YIL044C
chrIX	273968	274969		40.29	42.9855	47.8358	51.0473	41.8566	41.2657	39.6663	51.0403	YIL043C
chrIX	275057	276342		21.86	29.7023	20.4643	25.8024	29.4779	40.6264	19.1504	21.684	YIL042C
chrIX	276483	277592		44.62	48.7864	44.646	46.7814	46.0866	59.9307	44.6969	44.8769	YIL041W
chrIX	277687	278245		49.99	45.8013	66.0078	68.1589	55.4992	42.5696	64.2841	80.8515	YIL040W
chrIX	278373	279994		20.85	23.3967	36.3167	33.5632	19.5414	23.388	31.4007	31.7955	YIL039W
chrIX	279979	282894		37.42	38.9688	44.1774	38.5768	29.7764	37.564	39.2371	37.7815	YIL038C
chrIX	285482	287538		29.36	36.2396	27.295	29.3226	34.0382	57.5158	31.8903	30.4482	YIL036W
chrIX	287437	289060		46.78	43.3968	45.1467	42.9859	42.2652	49.5499	45.8545	47.8722	YIL035C
chrIX	289152	290141		46.25	50.0472	39.2461	42.9935	51.7449	54.3788	37.9458	40.0232	YIL034C
chrIX	290239	291776		30.37	41.1996	23.9719	29.3527	36.7871	55.1221	24.6414	26.3441	YIL033C
chrIX	292462	296135		22.09	26.0604	39.5941	33.7735	19.879	34.7164	31.24	36.9554	YIL031W
chrIX	295964	300057		36.45	49.4558	37.3396	32.4584	31.6256	39.8764	31.7025	35.6787	YIL030C
chrIX	300450	301361		9.851	11.3523	21.3456	19.737	10.0836	16.0367	16.7148	16.5356	YIL029C
chrIX	303592	304182		47.02	43.531	35.999	40.6043	48.2023	34.6698	42.3475	42.4575	YIL027C
chrIX	304335	307937		23.22	21.8248	14.9018	14.663	19.1252	23.6244	15.5053	14.4986	YIL026C
chrIX	308581	310462		20.74	28.8491	48.4528	43.3045	22.0015	25.1486	16.5659	21.9183	YIL023C
chrIX	311046	312685		54.11	60.3927	61.3478	58.6725	50.6391	46.1734	46.429	51.6508	YIL022W
chrIX	312792	313994		51.22	52.9362	52.9416	51.4419	51.4064	38.0406	41.7098	48.7968	YIL021W
chrIX	313915	314908		27.53	27.1639	48.4283	49.8649	22.6274	27.4537	37.6638	47.8408	YIL020C
chrIX	315057	316244		32.77	31.9077	42.2216	49.0912	19.9171	23.1446	33.3363	48.6665	YIL019W
chrIX	316725	318021	2_RPG	425.4	127.426	576.673	596.111	387.972	48.6632	419.007	472.57	YIL018W
chrIX	317938	321041		24.03	20.5842	30.5125	31.0978	18.0375	22.7911	32.5419	31.2482	YIL017C
chrIX	321386	321992		114	99.4168	152.261	180.644	31.6622	35.9897	85.1287	105.402	YIL016W
chrIX	322267	324105		60.33	47.4308	171.078	186.249	7.85829	15.6499	43.5075	58.2563	YIL015W
chrIX	325114	325613		4.92	4.48529	4.15118	5.05914	6.78832	6.46445	7.46387	6.60597	YIL014C-A
chrIX	325928	327998		22.85	28.0267	21.8684	21.1338	20.9498	22.5655	26.5914	22.9325	YIL014W
chrIX	328099	332555		10.98	17.577	13.1491	14.5526	9.12432	25.5664	15.5171	12.021	YIL013C
chrIX	333694	334609		5.454	12.9624	9.79809	12.1814	5.09107	26.4564	12.207	9.69872	YIL011W
chrIX	334831	335709		16.82	21.4941	12.3905	13.4333	18.9253	28.8659	18.9161	14.5151	YIL010W
chrIX	335516	336269		22.27	23.7136	15.2429	22.1364	26.5115	29.6495	26.6466	20.2243	YIL009C-A
chrIX	339329	341632		52.83	55.0864	51.3441	59.0525	27.432	34.0872	51.8679	47.2129	YIL009W
chrIX	342443	342961		29.82	34.9412	36.2097	30.2577	26.0067	26.8512	24.9589	22.4491	YIL008W
chrIX	342832	343681		22.17	32.4091	61.4738	49.6809	23.1784	35.9217	29.7919	26.0926	YIL007C
chrIX	344045	345352		18.06	24.0826	18.0342	19.2726	21.6141	36.3202	17.2462	14.9583	YIL006W
chrIX	345558	347986		20.37	23.2254	19.5963	17.6879	19.4185	31.9021	24.2508	18.8966	YIL005W
chrIX	347883	348533		31.89	38.1226	23.3396	26.901	35.8506	42.8489	31.5973	23.9573	YIL004C
chrIX	349069	350090		23.29	27.3226	14.597	18.0242	21.673	32.5898	21.1668	17.2671	YIL003W
chrIX	350272	350582		43.9	40.1518	30.0444	36.0437	51.3565	37.7807	49.0587	39.2834	YIL002W-A
chrIX	350438	353596		17.51	20.4433	17.922	17.1255	17.6524	27.8253	21.2334	16.2465	YIL002C
chrIX	353880	355576		24.78	24.2561	24.2439	20.7998	20.3854	35.6035	23.3119	19.4385	YIL001W
chrIX	355989	356979		26.51	27.9632	26.8568	25.0926	29.8655	30.5083	27.2131	24.5261	YIR001C
chrIX	357327	360486		21.34	26.2466	18.2136	17.917	18.1196	31.7304	23.54	18.1815	YIR002C
chrIX	360836	362996		24.64	30.0234	25.2054	25.6967	24.4068	33.7008	24.5046	21.7366	YIR003W
chrIX	363167	364629		32.89	39.4232	39.0031	37.4319	34.2239	39.6839	37.4332	31.7702	YIR004W
chrIX	364887	365402		20.71	22.0435	17.3053	20.4142	23.5964	22.6611	29.3401	22.002	YIR005W
chrIX	365402	369968		34.68	43.6342	31.3676	32.1818	33.301	40.8311	30.5521	28.0424	YIR006C
chrIX	370608	373110		8.479	12.8612	13.9342	15.2668	10.1633	20.8247	16.6991	12.5886	YIR007W
chrIX	373006	374364		24.17	28.1625	28.2857	29.2278	21.8926	25.1943	30.1691	28.5587	YIR008C
chrIX	374446	375305		26.44	33.3197	27.856	30.6733	32.1562	28.9818	28.899	27.1068	YIR009W
chrIX	375336	377289		32.19	35.7455	28.3549	28.8682	28.4487	34.4096	28.23	27.4326	YIR010W
chrIX	377211	378279		42.51	53.9708	43.0875	42.041	42.9993	52.2631	42.7462	39.9723	YIR011C
chrIX	378445	379906	1_RiBi	57.43	76.0082	54.2628	53.0936	47.4861	53.2668	48.2719	48.9647	YIR012W
chrIX	379929	380462		5.97	7.86189	12.3946	11.4871	5.32255	14.8342	8.73765	9.42615	YIR013C
chrIX	381061	381833		48.93	54.929	47.4158	48.9788	59.4534	72.9297	53.0819	48.5271	YIR014W
chrIX	382586	383475		27.68	38.5485	43.2606	41.2012	29.0868	52.1655	29.3549	32.7893	YIR016W
chrIX	383397	384119		20.4	21.002	21.9286	18.026	26.0733	37.5034	21.2122	16.5544	YIR017C
chrIX	384608	385822		30.33	36.2048	37.9513	36.0296	26.2068	48.2965	28.5564	26.7653	YIR018W
chrIX	389475	393745		6.937	11.6169	9.7746	10.3789	6.50472	12.5561	9.87339	8.78582	YIR019C
chrIX	397241	398419		25.68	30.5331	18.9263	22.7494	27.257	28.7425	25.8038	22.0714	YIR021W
chrIX	398513	399338		33.57	33.7788	23.8208	28.1471	33.4906	31.5786	29.9418	24.819	YIR021W-A
chrIX	398674	399338		35.36	36.5167	27.0006	31.4942	32.1294	32.9328	31.7608	26.2544	YIR022W
chrIX	399747	402799		25.41	29.2704	25.2503	23.7058	21.6781	33.9194	24.1726	19.8378	YIR023W
chrIX	402763	403534		20.27	26.4956	21.9233	19.7575	22.2608	31.2097	24.9605	20.8218	YIR024C
chrIX	403641	404796		18.37	26.8347	17.6632	18.3117	18.904	28.3059	16.9644	16.288	YIR025W
chrIX	404779	406006		30.59	42.1125	20.7687	23.1532	18.9016	33.8763	22.4884	20.3732	YIR026C
chrIX	411983	412809		9.811	11.9527	8.45724	9.47259	9.67255	14.7216	11.9197	9.88758	YIR030C
chrIX	412960	414802		36.64	38.2567	31.2539	31.374	35.1884	48.1718	36.1566	32.3781	YIR031C
chrIX	414905	415678		48.98	53.1111	35.1064	44.2715	64.1098	60.0092	45.8979	43.8382	YIR032C
chrIX	416070	419567		35.3	41.514	23.315	21.7004	30.203	67.5553	73.4082	62.3089	YIR033W
chrIX	419542	420785		23.72	33.1479	37.1569	31.4919	27.5443	58.8377	35.522	29.2626	YIR034C
chrIX	420961	421858		23.11	35.1854	32.8443	35.2794	22.329	41.7622	30.8112	25.105	YIR035C
chrIX	422005	422921		12.79	22.7116	11.4842	15.8866	18.1875	33.4587	11.8309	11.3691	YIR036C
chrIX	423024	423768		16.03	23.0663	11.1303	15.0951	23.2767	43.6216	18.2614	13.6672	YIR037W
chrIX	423690	424542		9.633	15.5604	8.83488	11.9471	14.0129	30.4777	12.9553	11.9948	YIR038C
chrIX	430321	432256		3.865	7.28907	25.4634	25.7125	6.48263	19.1191	25.0089	21.7248	YIR039C
chrIX	433720	434324		1.037	1.42586	2.53632	2.81983	1.60714	4.56623	3.16482	2.67454	YIR041W
chrIX	434895	436051		14.42	17.2904	24.6064	25.4297	15.9101	21.9771	29.0489	25.5436	YIR042C
chrV	13585	14644		27.63	22.5777	28.0941	23.7086	25.0107	30.6903	27.3	27.6075	YEL072W
chrV	16287	17963		90.53	66.1488	650.051	559.015	79.2403	98.7852	556.972	523.147	YEL071W
chrV	19588	21233		0.9266	1.43033	7.52826	6.49426	1.32552	5.04548	2.81508	6.33131	YEL070W
chrV	21428	23231		5.171	7.66374	5.94652	6.00681	7.18509	13.0954	5.75253	6.59874	YEL069C
chrV	25993	26970		17.86	19.5225	12.512	16.3136	24.5659	24.887	16.8409	19.2367	YEL067C
chrV	27614	29619		31.16	29.5663	21.7617	20.7381	24.0725	27.9925	11.3842	13.0676	YEL065W
chrV	29692	31283		16.24	16.5222	15.7633	14.9751	14.7048	16.9532	13.6061	14.3963	YEL064C
chrV	31424	33721		54.61	55.9139	43.8113	44.2622	51.8181	56.2485	47.0064	44.4202	YEL063C
chrV	36273	39632		26.21	27.5162	21.0625	21.1131	23.8624	30.4783	23.1943	23.6643	YEL061C
chrV	39810	42015		30.77	52.582	70.883	45.4721	42.7717	73.5406	64.1216	63.1122	YEL060C
chrV	42343	42748		13.49	22.2562	54.6792	42.5763	20.8691	24.3445	21.9646	29.0758	YEL059C-A
chrV	43207	45001		34.62	42.2524	68.4173	65.1437	31.8295	36.7106	36.7992	35.7978	YEL058W
chrV	47089	48404		36.67	37.7841	31.5389	31.5814	34.7055	40.2779	35.3023	30.2876	YEL056W
chrV	48397	51633		41.93	46.1603	40.0581	37.6578	30.3425	41.7011	43.9284	36.7327	YEL055C
chrV	52480	53343	2_RPG	373.1	115.448	348.384	394.521	367.632	66.5256	375.167	409.408	YEL054C
chrV	53816	56169		21.41	17.1547	23.1907	23.669	19.666	23.8066	24.222	26.6441	YEL053C
chrV	56535	58171		16.15	19.8567	24.6773	23.6979	15.9907	26.6237	18.5589	20.1057	YEL052W
chrV	58306	59257		62.89	60.6739	58.5162	61.7595	65.4585	68.7758	71.5391	69.4272	YEL051W
chrV	59514	60945		38.51	41.2652	34.051	39.5922	39.0493	42.8181	29.2829	29.9763	YEL050C
chrV	63712	64112		5.401	8.0442	5.78428	6.05165	2.98427	7.74195	6.33357	6.54935	YEL049W
chrV	64192	65193		31.6	31.7044	23.6718	23.555	24.0703	20.1543	28.6419	25.4093	YEL048C
chrV	65308	66818		25.77	25.768	52.089	50.5558	21.5683	27.6564	60.994	57.903	YEL047C
chrV	67046	68909		296.5	274.348	81.2671	98.3403	285.167	170.707	113.421	107.273	YEL046C
chrV	69727	70309		72.11	74.8505	37.9972	46.1655	70.0806	57.8064	43.4703	39.492	YEL044W
chrV	70432	73462		29.44	34.6831	34.0943	31.5426	27.2917	30.87	28.7203	28.4768	YEL043W
chrV	73557	75475		42.15	44.5157	31.2104	30.5187	34.3883	29.8831	29.6726	28.7364	YEL042W
chrV	78013	79500		207.3	208.892	364.52	378.434	207.507	156.532	263.469	312.393	YEL040W
chrV	79529	80065		27.21	35.8792	74.9894	84.8731	41.6369	169.28	178.989	135.29	YEL039C
chrV	80410	81200	3_MSN2	18.08	33.3124	17.0049	21.7546	19.4904	47.9262	28.286	21.3899	YEL038W
chrV	81243	82805		56.83	83.6993	34.617	33.6884	57.9439	77.1467	34.2393	32.345	YEL037C
chrV	82966	84696		52.88	64.6874	60.0469	64.7492	43.6539	54.1291	47.419	43.3504	YEL036C
chrV	85582	86368		913.3	828.183	657.389	735.384	634.449	528.746	647.447	598.426	YEL034W
chrV	86885	89999		38.13	41.9414	43.8244	41.0374	35.597	31.5814	34.4921	33.2502	YEL032W
chrV	90221	93991		52.8	65.6624	33.2161	28.7895	44.2124	59.2057	33.2259	28.5818	YEL031W
chrV	94221	96742		15.36	19.202	12.8841	13.3203	15.5742	22.5406	16.297	12.6636	YEL030W
chrV	96750	97860		26.58	30.1599	27.6445	27.5372	28.9977	33.1391	39.9165	31.2901	YEL029C
chrV	100698	101528		131.4	125.412	126.286	138.67	135.903	130.938	153.963	144.019	YEL027W
chrV	101752	102395	1_RiBi	269.5	226.644	179.89	191.259	291.268	161.42	269.663	255.26	YEL026W
chrV	102375	106186		25.02	30.5799	25.3883	26.1555	24.2434	31.4632	33.4047	26.3586	YEL025C
chrV	107145	108314		72.54	86.7579	80.6847	78.4747	141.677	117.417	120.8	107.576	YEL024W
chrV	108439	110552		10.63	12.9429	19.4715	18.0635	9.31955	15.4688	19.4374	18.8269	YEL023C
chrV	111353	115877		25.7	27.0922	20.1519	19.0242	20.9599	27.9464	26.0339	20.8546	YEL022W
chrV	116107	117031		591.8	476.252	415.306	65.9447	586.656	317.455	382.775	470.898	YEL021W
chrV	117134	117591		134.1	118.462	110.275	133.891	164.508	115.715	131.145	138.299	YEL020W-A
chrV	118514	120366		10.32	12.7452	15.4553	18.3593	8.64322	14.432	17.0918	15.1284	YEL020C
chrV	120346	121310		15.76	14.1433	14.7819	17.3172	12.7646	15.608	17.5744	15.9435	YEL019C
chrV	121436	122378		47.61	52.5156	46.7803	49.6263	48.4118	47.3035	43.8831	45.7629	YEL018W
chrV	122380	123038		239.1	190.841	149.296	163.555	262.895	155.38	198.813	199.506	YEL017C-A
chrV	123615	124765		24.83	28.8464	22.2471	22.5964	25.8455	38.194	20.1898	17.6777	YEL017W
chrV	124521	126424		20.18	22.3619	17.8162	19.9622	18.0215	23.0771	18.4311	16.8269	YEL016C
chrV	126589	128340		43.89	49.1922	38.7027	38.923	40.3129	44.2844	38.1999	35.4069	YEL015W
chrV	128550	130745		25.97	28.3758	34.5129	32.8679	27.7689	43.0038	36.5181	33.2662	YEL013W
chrV	131620	132641		7.572	13.3193	6.02164	8.37038	11.4287	31.3246	10.5917	9.01926	YEL012W
chrV	133088	135348		16.86	25.6144	15.3273	17.4645	26.3949	61.2742	22.0436	17.1998	YEL011W
chrV	138821	139851		412.6	325.173	468.098	387.743	343.854	203.745	370.083	437.49	YEL009C
chrV	141630	143924		84.87	65.3263	61.1626	60.2314	79.3763	72.4006	68.4632	68.1188	YEL007W
chrV	144252	145927		36.6	36.5268	27.8048	29.1466	33.2705	35.5524	28.804	27.5575	YEL006W
chrV	145823	146794		15.59	18.7846	17.0574	21.1092	19.8515	28.9209	22.3891	18.1481	YEL005C
chrV	146893	148067		22.28	24.4562	20.6767	20.7555	27.6821	31.8469	22.3561	19.8786	YEL004W
chrV	148156	148724		41.81	44.3636	21.0562	26.0373	40.9211	60.0275	37.7825	31.1923	YEL003W
chrV	148698	150089		39.43	48.6707	28.2908	27.8294	39.2872	78.7815	33.3878	27.5036	YEL002C
chrV	150205	151016		37.12	44.7276	21.9192	25.2745	38.6935	55.7951	26.1624	21.49	YEL001C
chrV	153403	155913		62.03	58.3172	19.7817	21.5497	85.8381	62.8282	40.916	29.1002	YER001W
chrV	156738	157588	1_RiBi	81.02	90.9772	54.3223	54.4501	62.1197	56.8811	65.0925	59.3299	YER002W
chrV	157655	159161		42.57	42.2681	14.5478	15.4701	38.7109	40.2223	19.0784	15.3667	YER003C
chrV	159569	160516		48.92	65.8475	20.0913	23.5962	57.4151	62.8474	29.0459	27.4894	YER004W
chrV	162683	164348	1_RiBi	70.2	86.0972	58.4211	59.1741	43.3871	52.3386	60.5153	53.5575	YER006W
chrV	164505	166215		17.2	20.8084	17.6263	17.3059	14.1185	24.8152	20.8653	17.4414	YER007W
chrV	166047	166934		52.86	58.1933	46.5354	47.9909	50.6788	50.978	56.065	50.0143	YER007C-A
chrV	167739	171887		29.63	34.3989	29.4016	28.2578	28.3721	38.2572	32.4368	27.0895	YER008C
chrV	172026	172667		75	74.5375	49.62	59.9042	85.4631	68.5006	87.3498	66.7093	YER009W
chrV	172531	173366		20.48	26.505	23.3777	24.4958	20.9757	29.72	30.7853	24.8452	YER010C
chrV	175193	176168		5.359	10.8271	13.5597	15.6859	4.83036	20.4423	26.1299	26.5404	YER011W
chrV	177748	178571		97.71	134.515	17.8443	24.337	94.0306	139.737	34.2296	25.289	YER012W
chrV	178788	182346		18.74	24.3806	19.102	17.1744	16.1692	30.2805	19.5163	16.8317	YER013W
chrV	182545	184332		8.207	11.3015	15.123	12.7993	7.26821	18.9802	17.9169	14.5197	YER014W
chrV	184465	187028		10.31	14.7877	13.9407	16.3688	10.6889	20.6286	16.5155	15.1419	YER015W
chrV	188187	189431		31.12	36.6897	26.1693	27.7734	33.6678	38.4156	26.2961	24.1313	YER016W
chrV	189430	191909		23.94	34.9208	22.9953	24.1908	21.6771	42.3178	25.5226	20.5601	YER017C
chrV	191890	192711		50.03	55.9941	25.0449	33.3126	69.9181	51.5029	27.1571	27.3628	YER018C
chrV	192796	194313		46	55.7472	29.9588	36.4897	51.6099	53.5899	35.701	35.4206	YER019W
chrV	194228	194627		107.4	102.929	65.5054	83.7325	131.899	83.6131	92.0271	86.9091	YER019C-A
chrV	195074	196693		25.61	35.4154	38.0676	39.4885	33.1325	38.51	31.3665	32.9967	YER020W
chrV	196878	198650		71.5	96.557	29.6367	29.0526	70.7834	92.0227	38.7056	31.3621	YER021W
chrV	198775	200976		21.1	24.2312	23.1241	23.1264	20.7979	20.9484	26.3963	24.7128	YER022W
chrV	201022	202006		38.78	43.3638	42.7766	44.3362	40.4558	45.3735	35.7369	35.8528	YER023W
chrV	202177	205080		22.06	30.0011	43.7629	33.1717	20.5707	32.0992	36.1866	32.9171	YER024W
chrV	205185	207096	1_RiBi	91.36	100.029	90.4542	85.8459	73.5368	80.3939	85.1188	81.4563	YER025W
chrV	207517	208564		54.95	49.1462	35.5313	34.9233	73.3197	76.2424	33.8611	36.2429	YER026C
chrV	208747	210354		21.41	27.6228	15.811	17.5503	23.9677	31.4845	15.8801	14.8373	YER027C
chrV	210646	211987		25.54	27.8998	30.5215	31.2112	11.4603	21.4655	16.0671	17.597	YER028C
chrV	212474	213247		37.92	44.0495	34.3658	37.0085	33.8242	49.1429	33.6291	29.5823	YER029C
chrV	213348	214024		34.28	48.525	24.8884	28.2023	43.8349	52.9285	26.6787	24.9407	YER030W
chrV	213930	214788		40.31	52.1514	33.4348	35.5658	52.0427	60.2572	34.871	32.8613	YER031C
chrV	214969	217957		23.85	33.4241	14.3253	14.5584	24.9346	49.0367	22.1863	16.5105	YER032W
chrV	217885	221511		9.548	17.6866	23.4019	20.2032	11.7112	35.4459	18.5812	17.35	YER033C
chrV	222565	223206		62.16	106.633	59.387	65.3193	82.5278	220.882	56.5371	59.6595	YER035W
chrV	223259	225237		111.3	134.75	112.687	100.652	88.6265	147.526	105.267	102.212	YER036C
chrV	225777	227075		20.81	26.6534	50.5593	43.8019	6.65525	61.6817	38.6566	32.3057	YER037W
chrV	229707	232243		23.35	30.0059	29.4557	26.4456	21.3221	42.7044	25.8826	23.2591	YER040W
chrV	232378	234904		15.56	21.2753	15.8781	13.612	15.8602	24.9594	16.507	14.2248	YER041W
chrV	234844	235655		38.25	40.8907	19.7745	16.7572	29.2119	55.5377	26.5306	27.2923	YER042W
chrV	235550	237202		180.6	192.564	156.184	133.761	193.868	203.605	176.726	170.069	YER043C
chrV	237448	238155		63.42	79.2941	132.163	117.601	110.985	193.251	261.173	228.415	YER044C
chrV	239854	241576		12.44	18.8577	43.6733	39.4603	11.9348	40.1013	33.8303	34.1968	YER045C
chrV	243776	246690		20.4	23.7915	28.6834	23.0457	17.9759	43.2489	22.0496	23.374	YER047C
chrV	246859	248258		28.36	36.6501	31.9638	31.0281	28.5556	49.7222	34.546	30.9549	YER048C
chrV	250621	251334		58.05	62.3559	64.9264	64.1624	61.1702	80.9211	82.7594	73.307	YER048W-A
chrV	251709	253742		49.23	60.7952	96.7473	75.1109	37.6458	68.1414	80.4429	82.8638	YER049W
chrV	253862	254453		39.43	42.8561	33.1761	36.9664	48.6575	51.8621	47.171	38.7801	YER050C
chrV	254639	256290		15.49	18.0739	24.912	23.7254	14.1709	24.6104	24.0433	25.0521	YER051W
chrV	256262	258121		67.69	63.9849	55.3315	46.6318	69.8205	120.507	41.2643	43.0505	YER052C
chrV	258592	259736		17.52	25.2166	33.9648	47.7886	50.0116	160.721	83.1166	63.9282	YER053C
chrV	260715	261103		67.98	112.024	429.393	527.26	231.152	296.4	676.96	591.963	YER053C-A
chrV	261955	264140		16.9	23.6287	22.4955	27.0661	24.8387	41.6044	27.8012	25.4716	YER054C
chrV	264758	265917		111.2	69.4375	83.9976	69.104	134.872	59.5036	71.7846	72.5509	YER055C
chrV	266397	268203	1_RiBi	134.8	131.286	107.812	104.637	121.101	82.0657	114.12	105.12	YER056C
chrV	269342	270216	2_RPG	305.6	93.4173	337.371	344.878	287.557	41.8056	316.724	377.289	YER056C-A
chrV	270646	271205		63.14	27.5256	107.249	128.26	64.7092	25.4274	79.3214	113.888	YER057C
chrV	271705	272237		24.95	22.5523	23.7933	32.3725	36.6896	30.5981	30.3509	31.0587	YER058W
chrV	272441	273977		23.06	24.8801	19.9575	21.0185	23.8026	25.5613	22.6471	19.8099	YER059W
chrV	274421	276310	1_RiBi	22.48	29.1954	49.0944	46.6558	19.1979	26.8546	36.5306	39.5078	YER060W
chrV	278244	279665		10.99	17.4923	21.0994	22.8059	14.9919	17.1505	18.315	15.6792	YER061C
chrV	279755	280747		15.18	28.7505	32.2314	30.2688	23.8032	54.2212	23.5123	22.7841	YER062C
chrV	281616	282514		52.94	71.7021	34.075	40.5777	64.1241	92.8185	43.8243	35.5546	YER063W
chrV	282446	284362		118.8	118.452	23.9761	35.3704	121.842	86.8969	52.7286	37.1895	YER064C
chrV	285123	287181		40.06	54.7952	17.876	25.2292	39.896	47.8054	25.1382	26.0158	YER065C
chrV	291837	292643		14.36	30.5715	6.16768	10.2099	54.48	105.554	12.963	12.8258	YER067W
chrV	292929	294929		42.94	43.7332	38.5773	36.1835	47.5033	49.0688	39.439	35.3956	YER068W
chrV	295336	298121		24.91	22.253	32.7368	28.7336	49.0072	34.9989	30.573	29.449	YER069W
chrV	298871	301821		132	125.657	29.5065	36.3191	162.77	179.733	36.6785	40.0013	YER070W
chrV	301722	302378		62.79	45.6034	41.87	46.431	55.6277	58.2271	58.5797	59.8285	YER071C
chrV	302697	303339		216.1	129.03	119.46	108.925	146.171	117.453	120.729	116.273	YER072W
chrV	303579	305867		149.2	109.932	45.9304	57.9024	166.426	87.9974	54.1305	60.7867	YER073W
chrV	306296	307294	2_RPG	330.1	105.136	460.449	445.759	308.197	54.7998	366.667	421.174	YER074W
chrV	307583	308214		37.61	33.052	32.0088	40.6046	48.1136	42.611	47.185	41.9846	YER074W-A
chrV	308348	311365		26.48	32.4261	17.4434	21.7967	22.0157	44.0539	22.8104	19.6161	YER075C
chrV	312297	313637		10.56	13.5574	11.4233	13.161	11.1232	14.8611	11.8231	11.2844	YER076C
chrV	314548	316600		21.61	24.8684	33.8165	31.5037	19.1385	21.2571	23.7653	23.1861	YER077C
chrV	316701	318575		21.6	25.9712	25.2334	29.0291	23.0068	31.3054	29.1736	27.4198	YER078C
chrV	318840	319851		12.45	13.4368	18.9216	22.0247	14.9276	25.3418	23.0931	19.0197	YER079W
chrV	319917	321928		25.75	29.7849	23.6851	27.696	26.9389	33.7348	28.7367	25.32	YER080W
chrV	324179	325998	1_RiBi	42.17	51.2153	51.2062	50.2027	28.4268	50.2597	48.5031	45.6321	YER082C
chrV	326129	327075		36.01	39.6682	31.0245	35.3457	37.1656	36.8099	36.3316	32.1707	YER083C
chrV	328367	330348		39.87	44.4137	49.8615	49.9805	39.7502	43.8637	45.7578	43.876	YER086W
chrV	330529	332376		15.68	18.1779	17.4092	18.8205	16.9805	26.6894	20.0532	17.612	YER087W
chrV	332372	332876		68.25	64.3025	31.8167	35.8299	76.6488	53.4378	41.0915	33.8114	YER087C-B
chrV	333040	335355		41.3	43.8711	46.2921	61.051	46.4041	48.6075	41.3742	43.284	YER088C
chrV	335871	337691		42.5	41.9757	41.5356	52.5508	45.1242	49.3828	41.9921	43.5449	YER089C
chrV	337855	339560		34.62	34.5574	42.8863	43.3491	31.5837	33.2944	38.2986	36.7499	YER090W
chrV	339637	342236		141	89.5888	127.11	72.8446	200.919	106.212	104.01	111.403	YER091C
chrV	342815	343431		49.41	53.369	41.7714	41.7264	54.1055	57.2602	47.8808	42.6958	YER092W
chrV	343260	347667		16.19	19.6514	17.7864	17.7573	13.2373	27.7607	19.908	18.7861	YER093C
chrV	347787	348441		27.34	32.6522	20.4116	25.572	29.8122	34.2899	25.3684	26.5129	YER093C-A
chrV	348573	349455		62.68	92.0017	21.6605	28.7661	70.254	80.0591	25.3071	26.3182	YER094C
chrV	349912	351380		45.21	60.1922	25.6205	30.4432	53.5031	57.4543	19.1027	22.3455	YER095W
chrV	351613	353452		2.856	5.57897	7.11215	6.78008	3.29003	14.2854	6.32827	5.38947	YER096W
chrV	355283	358056		8.409	12.9235	7.44591	8.73198	9.38586	23.9963	10.9633	8.61425	YER098W
chrV	358030	359105		31.13	35.0652	29.3827	35.4163	28.9805	33.9996	38.165	35.0624	YER099C
chrV	359275	360408		34.46	34.6014	36.2872	36.3667	40.1057	41.3557	47.2403	45.1556	YER100W
chrV	360285	361827		13.52	13.5254	25.1871	26.6235	14.464	20.7636	24.1488	26.33	YER101C
chrV	362732	363767	2_RPG	399.9	133.39	517.59	501.72	352.851	74.2447	385.885	417.191	YER102W
chrV	364534	366646		15.01	49.5846	22.8831	24.7951	22.5751	480.291	25.257	25.0693	YER103W
chrV	366767	367810		24.54	30.6331	16.6215	20.1649	23.0393	49.7598	22.6947	20.1095	YER104W
chrV	367712	372033		25.78	30.6745	23.7172	23.5015	20.9397	32.9855	26.7481	23.9398	YER105C
chrV	373339	374720		30.47	31.9647	34.853	35.0667	26.9508	31.4653	29.3557	30.2599	YER107C
chrV	375027	377804		18.41	21.8011	22.0146	22.0626	15.9697	19.0399	21.0701	20.8843	YER109C
chrV	378608	382243		50.66	56.3997	49.9488	52.3627	29.8365	46.2287	44.4014	49.8132	YER110C
chrV	382508	386194		20.66	21.0687	23.7952	21.1933	21.1249	26.7092	22.0441	23.0025	YER111C
chrV	387130	387895		37.81	33.598	29.8827	32.6031	39.7065	41.92	40.8089	36.0048	YER112W
chrV	387857	390209		28.82	28.6665	30.6676	30.7634	23.9864	27.4454	27.4742	28.9194	YER113C
chrV	390350	394016		24.39	25.4133	26.9242	26.092	19.3714	25.6109	22.5274	23.3176	YER114C
chrV	394177	395073		27.78	20.787	52.4395	53.8651	25.459	21.0022	34.7789	50.8262	YER115C
chrV	394984	396271		33.34	25.0039	54.8862	68.2288	39.7168	26.8296	40.9983	62.5614	YER116C
chrV	396645	397718	2_RPG	340	107.584	461.995	454.074	351.409	42.6852	377.958	444.842	YER117W
chrV	397771	399261		32.54	29.6231	28.671	29.9614	27.2507	31.3281	25.2603	27.995	YER118C
chrV	399400	400875		24.99	25.4349	19.1198	23.6389	30.48	33.8078	15.2516	17.5054	YER119C
chrV	401072	401973		62.83	65.3527	51.2367	57.7826	75.5379	61.6701	49.566	51.39	YER120W
chrV	402752	404432		60.28	66.8151	52.389	49.2757	60.4625	54.5458	55.9493	52.0538	YER122C
chrV	404615	406720		31.11	33.6451	43.1971	41.7724	30.9565	31.3543	38.6801	40.0553	YER123W
chrV	407030	409102		107.1	94.0466	147.498	109.896	134.703	113.768	150.178	172.072	YER124C
chrV	409684	413119		36.66	42.4824	40.6312	37.3771	36.0939	49.1731	35.5866	34.9205	YER125W
chrV	413009	414275	1_RiBi	88.74	92.7737	77.5831	79.1785	76.2676	61.3292	81.9915	85.7516	YER126C
chrV	414450	415642	1_RiBi	64.32	74.5423	46.463	48.2954	42.4196	44.2357	44.961	44.9507	YER127W
chrV	415767	416596		25.99	25.9619	28.6991	30.8476	27.0033	24.8902	29.9345	31.3488	YER128W
chrV	416756	420949		27.46	30.2239	31.4259	30.9738	23.7851	31.4344	38.1466	32.8049	YER129W
chrV	420895	422541		40.22	38.0254	73.047	67.0411	42.0789	41.6043	67.167	61.2478	YER130C
chrV	423590	424456	2_RPG	322.3	132.924	396.714	400.584	290.82	77.8387	358.444	395.309	YER131W
chrV	425053	430902		27.72	28.0837	56.0975	46.9473	24.5211	28.3569	44.9266	43.5335	YER132C
chrV	432425	434187		77.89	79.5739	62.0746	64.1634	79.9565	86.2807	76.3816	63.9986	YER133W
chrV	437014	437857		24.92	23.0417	20.5293	21.6842	31.1977	27.2155	22.2343	22.0698	YER134C
chrV	439470	441297		32.17	35.3704	22.1712	25.7913	37.5159	42.487	30.3426	28.3436	YER136W
chrV	441204	441838		18.69	18.0637	12.1037	16.2991	16.1869	16.8564	16.3576	16.4829	YER137C
chrV	451506	453306		21.01	24.4597	28.6305	30.6115	27.5853	28.7723	49.3396	48.8278	YER140W
chrV	453395	455117		28.7	39.3226	113.752	92.6412	44.7608	75.504	192.217	178.431	YER141W
chrV	455111	456127		12.5	27.8756	19.7783	19.6331	14.6802	30.8135	23.5943	29.9638	YER142C
chrV	456248	457715		27.17	48.2426	14.9606	17.8614	26.7426	48.4928	15.4445	15.8696	YER143W
chrV	457691	460231		21.07	27.2895	32.4789	32.5383	18.2006	32.6411	26.0205	24.9431	YER144C
chrV	460423	461784		93.1	80.1022	121.297	103.088	101.243	59.1955	74.3669	100.07	YER145C
chrV	462529	462951		55.68	51.4323	30.5826	41.9104	49.2561	49.9359	31.1612	31.3058	YER146W
chrV	462888	464842		21.03	29.1346	21.6876	25.3989	17.4837	36.3451	16.297	19.9397	YER147C
chrV	465091	466215		68.1	69.4434	81.5472	74.4649	65.6938	60.8532	77.4118	78.9208	YER148W
chrV	466081	467546		22.37	26.9671	13.9067	15.7263	17.1642	26.2729	15.8369	15.6396	YER149C
chrV	468334	468981		6.674	11.6951	16.0924	14.5606	10.1759	33.748	14.6051	19.1385	YER150W
chrV	469619	472597		30.55	38.6484	25.1476	23.1278	28.912	34.3337	22.1584	21.1547	YER151C
chrV	472603	474018		25.91	26.9267	17.7381	23.7775	26.2176	22.3207	17.7306	18.6118	YER152C
chrV	474999	476295		49.78	53.0095	37.5861	45.985	56.802	41.6305	39.9989	41.594	YER154W
chrV	476212	483117		40.18	42.2728	43.5288	41.6975	37.067	32.2237	44.0791	40.756	YER155C
chrV	483209	484356		74.86	85.7336	47.4891	54.6973	70.6429	53.3755	44.2327	42.896	YER156C
chrV	484764	487229		24.57	22.6168	27.4362	25.2465	19.4304	20.9888	29.5598	25.5379	YER157W
chrV	488755	490780	3_MSN2	12.78	18.4702	15.0171	18.2209	16.5014	25.8684	19.7363	17.7153	YER158C
chrV	491387	492168		55.54	66.1139	61.1957	54.2685	70.4034	60.5569	59.3468	62.0352	YER159C
chrV	499074	500394		34.75	39.9507	30.5917	30.0933	33.3039	33.0718	27.7655	28.83	YER161C
chrV	500599	502931		11.93	17.8072	16.3574	16.4532	14.569	16.9213	15.4642	14.9653	YER162C
chrV	502976	503789		19.79	30.9889	21.7038	26.8692	30.2913	31.1174	19.3134	20.6772	YER163C
chrV	505079	509923		25.71	25.7952	21.1783	21.9596	22.0308	16.9593	21.9917	21.2125	YER164W
chrV	510230	512258		118.3	114.638	127.114	111.042	100.763	62.6235	103.748	114.098	YER165W
chrV	512443	517544		22.23	27.233	25.4893	24.2103	22.1154	22.6566	21.9221	20.5491	YER166W
chrV	517839	520783		32.04	27.9396	54.9579	44.6244	30.9847	23.795	39.9629	42.5715	YER167W
chrV	520966	522725		25.97	30.11	19.2609	20.8288	25.7064	32.678	25.3804	21.6955	YER168C
chrV	523087	525963		20.66	29.5681	14.7457	17.4041	17.7828	32.5867	15.9794	14.5332	YER169W
chrV	525912	526996		24.65	23.4108	16.7239	19.1181	26.124	24.6106	20.0821	20.1921	YER170W
chrV	526934	529537		20.89	24.5777	23.9405	23.5901	17.977	23.4785	26.183	24.1509	YER171W
chrV	529411	536077		20.98	26.2744	26.4367	24.2994	17.5891	23.3935	22.7853	23.622	YER172C
chrV	536269	538342		18.81	20.9098	18.0499	18.4432	16.6923	24.8498	17.7415	18.5937	YER173W
chrV	538319	539308		23.07	23.725	24.424	24.0722	21.086	27.7551	34.5833	31.3005	YER174C
chrV	539300	540403		18.72	24.4655	31.8957	27.4457	27.6479	34.5076	28.092	28.1038	YER175C
chrV	541647	545155		50.13	57.2858	45.7878	42.8142	60.1302	56.3424	40.3109	39.8376	YER176W
chrV	545555	546591		152.4	169.976	98.3466	97.5451	180.261	151.766	82.7823	77.0175	YER177W
chrV	546756	548213		44.97	51.3186	64.1062	62.7853	47.9758	64.5394	49.9709	46.4813	YER178W
chrV	552489	553332		18.57	21.4318	16.2642	20.2243	20.2575	31.7267	19.6971	17.0323	YER182W
chrV	553251	554005		21.83	24.894	22.5558	22.2694	24.586	23.9048	19.876	21.3693	YER183C
chrV	555965	559051		11.34	15.8275	18.4638	13.8656	9.52055	22.2023	16.9638	14.2502	YER184C
chrV	559317	560420		5.821	7.25078	8.77533	8.37803	4.97868	13.0469	10.2581	8.79113	YER185W
chrV	561441	562817		21.73	21.8197	20.3917	18.817	23.0912	24.7548	21.5515	19.9973	YER186C
chrV	568032	568925		3.555	5.41919	4.25344	7.31377	4.39424	8.90326	5.59001	5.64726	YER188W
chrVI	6425	7664		8.917	9.40758	11.3432	9.64977	9.23874	15.8823	11.8259	9.28398	YFL062W
chrVI	9480	10335		6.363	9.48016	15.1693	12.4324	6.16503	13.6115	7.67119	8.17332	YFL061W
chrVI	11196	12396		6.841	8.654	5.83957	6.69422	6.22531	11.8557	4.96817	5.09627	YFL059W
chrVI	12897	14056		3.841	5.1809	10.5711	10.5624	5.41566	9.3496	9.11508	12.6463	YFL058W
chrVI	20846	22825		6.041	11.5005	6.24787	6.47672	7.98131	15.3266	6.69762	5.31914	YFL054C
chrVI	23367	25502		4.693	9.14088	8.46882	7.54925	4.95442	14.1075	5.87829	5.98809	YFL053W
chrVI	28221	29829		3.26	7.06243	2.06873	2.80274	6.18424	21.5973	3.76859	3.03254	YFL052W
chrVI	29875	30564		4.275	7.24415	4.44884	5.74583	3.83412	19.6432	4.58239	4.54997	YFL051C
chrVI	32954	36271		14.9	18.133	31.494	26.0682	15.2038	22.7134	20.4355	21.5578	YFL050C
chrVI	36771	38765		20.94	23.0414	27.8375	24.4097	18.582	25.995	21.6687	20.7262	YFL049W
chrVI	38725	40226		23.2	26.4965	32.7075	30.3139	22.8329	38.1522	27.3859	24.2588	YFL048C
chrVI	40412	42630		19.49	23.293	28.2328	27.2124	18.0113	27.8606	23.8452	20.9632	YFL047W
chrVI	42744	43588		36.83	40.36	35.2103	33.0659	33.9856	38.537	27.9861	29.7007	YFL046W
chrVI	43468	44466		129.9	125.99	70.3929	69.1191	121.117	132.307	71.2774	67.5001	YFL045C
chrVI	44520	45597		65.15	75.6973	28.1371	33.7939	85.1177	93.0014	37.3064	38.5724	YFL044C
chrVI	45657	47776		13.5	19.2177	13.2545	14.5692	16.1656	27.4324	16.7604	15.8151	YFL042C
chrVI	49116	51188		18.2	20.0787	22.2064	21.0206	15.9351	24.8327	14.2895	16.6577	YFL041W
chrVI	53156	54902		207.7	201.788	155.676	150.886	234.244	215.847	157.23	154.442	YFL039C
chrVI	55259	56068		83.69	98.4679	55.8419	58.1518	98.4158	102.199	58.1725	57.4308	YFL038C
chrVI	56259	57935		47.84	54.216	22.7818	24.75	45.788	50.8037	19.8307	18.8335	YFL037W
chrVI	58533	62877		25.54	32.772	27.2228	23.5407	24.1746	32.0574	27.4457	25.4146	YFL036W
chrVI	62842	64056		43.5	42.4187	43.6163	38.9257	36.5715	37.4867	33.2067	34.4591	YFL034C-B
chrVI	64180	64973	2_RPG	333.3	109.588	391.243	393.971	304.746	52.5898	405.021	447.988	YFL034C-A
chrVI	65285	68817		14.7	15.6174	28.3745	25.3182	15.3637	18.3938	17.4186	21.1812	YFL034W
chrVI	68792	74667		14.89	22.7006	31.309	26.5474	16.8117	29.3074	21.2088	24.7401	YFL033C
chrVI	75112	76563		173.7	168.031	130.366	111.581	171.401	183.714	109.906	120.001	YFL031W
chrVI	76707	78075		10.45	14.2789	14.7355	17.5463	14.9764	16.9084	12.5882	15.8321	YFL030W
chrVI	77986	79199		11.43	17.5005	31.3638	30.7556	14.1715	17.0326	16.7249	23.6888	YFL029C
chrVI	79268	80255		20.14	22.339	29.599	28.5297	25.018	23.6897	28.7123	29.6097	YFL028C
chrVI	80351	81931		28.91	31.1148	55.8248	54.6082	16.4833	19.9888	34.9114	36.306	YFL027C
chrVI	82549	84047		164.4	146.903	405.632	428.915	5.18588	15.2043	181.162	220.503	YFL026W
chrVI	83717	87312		27.93	31.4236	51.5733	48.7316	13.6714	21.4216	33.1946	33.2032	YFL025C
chrVI	87702	90618		53.08	54.6736	54.1339	49.5972	49.1054	45.7455	47.9782	46.1807	YFL024C
chrVI	90965	93429		24.82	34.0935	19.3255	21.125	15.7945	39.5902	21.5526	20.4047	YFL023W
chrVI	93396	95104		58.51	60.9189	51.2561	51.3238	50.7287	48.5035	47.2435	44.9077	YFL022C
chrVI	95965	97631		62.08	53.0483	46.0364	42.2625	76.7802	60.1898	49.715	50.8557	YFL021W
chrVI	99190	99756		2.756	4.08493	11.5413	12.5006	2.83092	11.3963	9.72311	14.6556	YFL020C
chrVI	101543	103229		31.82	38.3067	25.9825	26.0094	36.1908	48.8969	26.4516	22.4213	YFL018C
chrVI	103639	104003		29.32	30.5061	18.1306	23.361	35.3357	34.6133	30.9657	24.0265	YFL017W-A
chrVI	103783	104511		30.88	34.7296	18.2364	23.29	33.7217	29.9429	26.854	21.5079	YFL017C
chrVI	104597	106320	4_HSF1	53.66	98.6115	23.5403	23.8763	65.093	215.009	19.1405	17.4515	YFL016C
chrVI	107196	107810		5.162	8.25246	22.5808	34.0974	26.7541	61.3611	27.4043	33.446	YFL014W
chrVI	107762	109962		25.74	29.4755	31.5338	29.9447	26.2417	30.5785	26.2773	26.0881	YFL013C
chrVI	112324	113985		0.9328	2.09933	2.11473	2.47671	1.39136	6.2643	3.40984	2.43569	YFL011W
chrVI	114945	115771		28.69	31.9704	32.6437	37.5407	30.0892	24.5403	34.5333	33.3269	YFL010C
chrVI	115952	118571		20.98	22.2013	18.8177	18.9092	19.12	19.0658	22.386	19.9514	YFL009W
chrVI	119375	123210		30.39	29.6126	22.3462	18.9253	26.937	30.8899	22.0956	19.4429	YFL008W
chrVI	123336	129988		22.81	39.1844	13.8912	15.8197	18.2233	31.9111	18.6894	14.4455	YFL007W
chrVI	130121	131199		57.46	50.783	37.2532	36.811	50.3053	45.1627	47.6822	38.8746	YFL005W
chrVI	131666	134372		50	35.1562	35.99	26.8894	30.3438	31.4956	36.71	29.85	YFL004W
chrVI	144985	146946		34.25	39.2077	27.9819	27.602	25.2506	37.0477	34.2292	30.371	YFL002C
chrVI	147092	148493		41.19	42.3091	33.1589	32.1868	35.2802	41.7317	36.9082	34.7615	YFL001W
chrVI	149028	149819	1_RiBi	63.61	65.8118	35.6951	44.2356	48.9924	57.6931	54.6139	48.4276	YFR001W
chrVI	149985	152618		38.46	40.793	33.8031	31.3953	30.5182	44.6856	38.1692	33.8016	YFR002W
chrVI	152519	153192		31.45	48.3285	19.6483	30.0087	42.7448	60.4064	29.5799	26.5362	YFR003C
chrVI	153343	154372		70.17	104.117	34.1225	35.6934	73.8494	110.446	40.93	35.6658	YFR004W
chrVI	154317	155916		43.32	45.6422	34.2151	37.6327	43.2882	48.6871	51.0629	39.2415	YFR005C
chrVI	156104	157842		34.82	43.2092	30.7795	32.5426	41.2518	53.3711	48.5425	34.8783	YFR006W
chrVI	159278	160428		16.93	22.7118	16.297	18.0523	23.5307	29.5692	22.4405	17.8912	YFR007W
chrVI	160491	161539		14.08	15.4715	13.0881	14.9495	15.091	18.2205	16.0838	14.9494	YFR008W
chrVI	162411	164939	1_RiBi	51.62	55.7095	47.4324	40.4335	43.5764	42.7768	47.3671	40.1021	YFR009W
chrVI	164984	166658		45.78	72.2566	37.1018	34.7608	46.6021	92.252	41.9786	33.7353	YFR010W
chrVI	166527	167301		40.03	46.5337	24.1265	26.5898	49.54	46.1502	37.5565	30.2104	YFR011C
chrVI	169861	172360		20.91	24.6453	20.4999	19.2581	18.3933	30.8761	22.3838	17.501	YFR013W
chrVI	172343	173935		21.01	29.0209	17.3361	21.0139	24.8337	47.5551	26.1982	19.5893	YFR014C
chrVI	174127	176479		6.237	14.1803	5.78902	7.58742	18.3494	74.0087	8.64499	7.17977	YFR015C
chrVI	176990	180857		17.73	23.9151	16.5188	16.8647	19.3036	27.6426	22.3488	16.8932	YFR016C
chrVI	182201	182938		3.918	7.68125	4.13275	5.0773	9.3578	26.7045	4.39081	4.13756	YFR017C
chrVI	182988	184282		13.63	18.5348	12.1834	16.939	16.2691	21.73	12.8561	12.692	YFR018C
chrVI	184491	191389		14.89	21.3189	16.6384	15.8338	15.3003	21.3868	16.5783	13.0993	YFR019W
chrVI	194717	196425		19.26	22.6882	21.7057	23.614	19.5805	24.0914	22.0441	19.8219	YFR021W
chrVI	196545	199142		10.36	14.3578	13.6329	14.287	11.7052	21.5103	19.3264	14.8025	YFR022W
chrVI	201808	203469		26.42	40.3565	19.7343	19.6221	28.3947	51.7489	21.1491	18.0132	YFR024C-A
chrVI	203654	204789		20.18	26.8654	19.6615	21.2678	26.2103	31.3182	23.1458	20.9248	YFR025C
chrVI	207376	208387		17.47	19.359	7.26533	8.82998	18.5977	23.1531	9.25003	8.12903	YFR027W
chrVI	208248	210135		36.54	37.7263	31.0305	31.418	30.4019	29.6385	27.8179	26.3074	YFR028C
chrVI	210872	213047		19.97	24.565	22.8606	22.8518	18.5548	28.1845	19.9969	19.5483	YFR029W
chrVI	213257	216477		26.72	27.5278	30.1973	24.7876	21.229	36.2938	33.8902	26.116	YFR030W
chrVI	216536	220150		24.07	23.6011	32.5974	31.9244	20.9802	29.603	34.9335	31.2292	YFR031C
chrVI	220346	221441	2_RPG	338.2	113.002	489.721	503.434	306.606	47.7239	312.565	372.219	YFR031C-A
chrVI	223160	223973	2_RPG	472.8	159.564	466.571	517.135	473.471	82.3569	482.91	532.852	YFR032C-B
chrVI	223160	223792		505.9	173.02	529.767	573.474	465.554	81.5198	503.877	545.952	YFR032C-A
chrVI	224181	224889		124.3	163.431	161.305	161.034	201.427	209.646	171.442	169.37	YFR033C
chrVI	224790	225992		87.78	115.571	58.4317	74.6506	142.538	125.833	64.5562	73.228	YFR034C
chrVI	226940	227394		27.85	34.6079	29.8574	35.7311	29.1335	34.9725	22.0421	28.936	YFR036W
chrVI	227393	229223		44.34	53.3595	43.0562	49.6573	43.4284	51.4223	37.0781	43.0484	YFR037C
chrVI	229379	232032		18.78	21.3636	16.2413	19.3443	15.4135	22.0372	18.9657	18.2298	YFR038W
chrVI	231943	233685		21.69	23.1477	19.2765	19.9847	21.8516	26.3335	26.2184	24.8864	YFR039C
chrVI	233925	237351		45.28	55.117	40.4364	36.5684	40.5018	62.7919	43.3109	39.0483	YFR040W
chrVI	237272	238289		30.75	29.0336	20.0989	22.0063	28.5198	34.7583	22.4041	22.6367	YFR041C
chrVI	238400	239147		22.32	22.9721	17.3396	18.2371	23.5094	27.9155	19.157	19.1441	YFR042W
chrVI	239937	241454		33.93	43.1921	43.7398	45.3718	38.957	51.634	33.5958	35.0577	YFR044C
chrVI	241981	243105		15.78	20.1687	20.7633	24.0919	17.4039	27.1296	19.2755	21.9357	YFR045W
chrVI	243000	244159		17.65	20.7173	21.6234	25.4128	17.8417	27.6749	18.3411	21.5525	YFR046C
chrVI	244200	245210		16.92	21.4657	18.4777	21.8773	21.4699	24.5469	14.7714	18.1327	YFR047C
chrVI	246079	248171		23.7	28.7684	30.0634	26.5254	22.0642	27.0854	25.2544	26.862	YFR048W
chrVI	248336	249014		19.35	31.8894	11.9324	15.1774	31.2669	45.1332	14.1527	13.3244	YFR049W
chrVI	248926	249918		57.74	86.4184	22.3757	21.2828	65.262	114.258	21.769	20.4954	YFR050C
chrVI	250090	251855		50.12	58.3586	34.443	35.2678	48.3499	65.9393	30.7068	30.857	YFR051C
chrVI	252464	253463		60.3	82.3129	29.0029	29.2566	65.806	120.052	32.6542	29.4102	YFR052W
chrVI	253422	255167		5.945	22.5376	6.94621	7.46522	57.1215	296.478	8.62513	11.8898	YFR053C
chrVI	264161	265614		94.12	95.1139	65.5826	66.5964	59.0881	67.8074	42.5509	37.458	YFR055W
chrVII	2777	4021		0	0.0470257	0	0	0	0	0	0	YGL263W
chrVII	6129	6670		0.4953	0.428817	0.796488	0.423179	0.362865	0.818336	0.420536	0.639723	YGL261C
chrVII	8231	9460		1.781	3.27885	8.45841	9.99083	4.84063	13.4958	9.21959	8.33032	YGL259W
chrVII	12395	14320		22.29	26.4152	23.5698	23.203	19.1429	38.0336	25.6086	21.7304	YGL257C
chrVII	14465	16480		43.03	48.0668	51.1856	46.6814	41.9546	45.03	41.1367	43.0397	YGL256W
chrVII	20956	22198		30.1	29.5172	111.191	63.8762	22.5818	40.6819	51.2957	54.8403	YGL255W
chrVII	22281	23787		38.22	46.0634	26.1737	27.8863	47.7995	64.0053	28.5006	32.2776	YGL254W
chrVII	23887	25583		188.4	185.35	82.0511	80.086	166.255	242.978	94.4103	87.2196	YGL253W
chrVII	25625	27543		32.3	35.165	30.8086	28.3048	31.1199	45.7467	30.6777	28.4695	YGL252C
chrVII	31868	32831		9.591	20.5254	12.0906	12.8124	12.5055	39.5823	19.2558	11.7598	YGL250W
chrVII	35588	36818		21	26.1466	82.6865	61.1232	25.3211	38.4933	53.7417	45.5557	YGL248W
chrVII	36912	37557		33.16	32.1268	27.231	25.8352	36.7251	38.5431	32.8253	29.4046	YGL247W
chrVII	37496	38819		33.04	37.603	26.7657	25.8531	29.415	36.7459	29.7417	26.8672	YGL246C
chrVII	38976	41211		49.9	56.4127	45.3264	43.481	51.2925	53.8585	45.0132	42.6259	YGL245W
chrVII	41422	43263		31.62	36.2181	35.4004	33.1998	30.7344	37.6246	32.99	32.3905	YGL244W
chrVII	43306	44644		15.32	17.4103	21.8875	21.5325	13.901	15.7944	19.0978	19.6077	YGL243W
chrVII	44525	45264		22.91	21.2427	16.5242	20.1949	22.3844	26.2837	18.1998	16.8857	YGL242C
chrVII	45412	48557		15.74	18.5243	14.4968	14.8966	14.1745	22.1959	16.5657	14.6805	YGL241W
chrVII	48611	49453		25.57	37.3019	18.4802	20.7252	29.0562	43.4007	18.6702	18.8525	YGL240W
chrVII	49508	52534		40.25	50.5695	36.2039	32.3103	36.5904	59.6058	42.9624	34.6338	YGL238W
chrVII	52363	53611	3_MSN2	22.43	27.4506	17.6395	20.7014	23.6478	33.4062	20.6982	18.5036	YGL237C
chrVII	53740	55815		17.05	21.241	14.7715	17.4667	15.2427	21.9676	13.0342	12.1659	YGL236C
chrVII	56375	59001		37.64	45.5726	41.6603	43.0281	38.9079	34.3698	30.2969	30.2006	YGL234W
chrVII	59075	61920		18.04	19.0343	18.037	17.6426	17.5452	23.607	22.0244	18.995	YGL233W
chrVII	62044	63075		32.19	30.051	32.2008	29.8946	30.084	29.465	38.2133	35.7901	YGL232W
chrVII	63000	63639		34.34	37.2828	56.7568	52.1589	38.097	37.5789	47.3045	44.8294	YGL231C
chrVII	64341	67225		7.234	10.0279	9.03096	9.62011	10.2551	18.508	12.664	9.9596	YGL229C
chrVII	67543	69484		34.13	39.0207	41.4244	37.8044	32.1083	49.4512	37.9607	34.9475	YGL228W
chrVII	69619	72665		12.14	15.9224	15.8441	16.3978	15.1726	27.6574	16.6112	14.7661	YGL227W
chrVII	72610	73234		41.58	39.9847	26.5191	27.9651	50.3009	49.6525	33.0706	28.0617	YGL226C-A
chrVII	73339	73812		38.43	34.2797	35.155	39.159	39.9681	50.5351	32.7384	40.1399	YGL226W
chrVII	76774	78020		88.29	89.2517	95.3594	79.264	86.3775	95.2512	92.8731	84.403	YGL225W
chrVII	77941	78958		28.62	30.4542	37.9366	33.1285	26.6999	33.5019	36.1994	32.644	YGL224C
chrVII	78970	80377		22.05	24.1889	27.7127	24.1719	23.2844	26.3337	25.5368	22.2795	YGL223C
chrVII	80599	81237		48.66	55.1679	57.0861	62.9386	56.5115	83.3639	75.9261	57.5035	YGL222C
chrVII	81347	82310		39.86	51.0682	42.3525	47.1551	43.0668	62.9394	38.8487	37.8957	YGL221C
chrVII	82373	82917		34.77	38.2042	30.4618	33.6385	44.1866	53.0246	31.2793	32.2984	YGL220W
chrVII	82792	84281		26.78	29.8487	27.5898	27.194	27.2165	40.3731	26.8586	24.8075	YGL219C
chrVII	84631	87638		26.86	30.6105	21.4174	23.0147	30.509	34.9671	27.355	23.7168	YGL216W
chrVII	87598	89638		46.08	48.8952	51.0274	45.0525	36.0052	55.7096	53.1195	41.9856	YGL215W
chrVII	89939	91282		27.12	30.9187	29.7872	27.5718	26.6234	37.3112	29.6387	27.2277	YGL213C
chrVII	93751	94568		50.57	50.2356	42.2311	42.0813	45.6565	59.309	33.2847	39.5619	YGL210W
chrVII	95728	97123		69.61	89.2056	70.2412	71.992	71.3163	65.4504	42.0467	54.7806	YGL209W
chrVII	97300	98715		15.34	22.5001	14.9506	18.6608	19.5203	27.6614	12.9372	13.9981	YGL208W
chrVII	98862	102207		48.13	58.2932	41.3006	32.9965	41.1973	65.1758	38.4914	33.0761	YGL207W
chrVII	102253	107610		35.88	39.4113	39.9289	37.5868	33.43	41.4063	41.8189	34.9021	YGL206C
chrVII	112387	114775		21.55	24.4995	20.3542	19.1094	19.1777	19.9684	20.2933	18.351	YGL203C
chrVII	115886	117630		50.64	48.7317	47.1838	42.877	53.2329	42.8866	48.1945	42.7087	YGL202W
chrVII	117651	120977		21.81	26.5032	25.7413	22.5444	19.3199	28.9074	21.8163	19.9098	YGL201C
chrVII	122586	123381		55.84	51.3772	26.5025	31.9145	64.9562	54.0175	27.441	26.5758	YGL200C
chrVII	123568	124348		45.02	53.1561	36.4118	44.1209	58.6002	56.3662	32.5374	31.8898	YGL198W
chrVII	129817	131281		30.05	30.4906	38.3263	37.2616	33.6332	37.0859	39.4688	40.4195	YGL196W
chrVII	131481	139639		37.91	41.0172	47.2148	41.931	31.8294	32.8805	43.0459	39.7887	YGL195W
chrVII	139570	140207		21.13	22.6216	22.4496	28.2946	27.3869	22.7551	29.8271	27.8618	YGL194C-A
chrVII	140263	141777		31.26	35.5182	33.7064	34.9796	29.5796	43.0862	37.0853	34.6138	YGL194C
chrVII	142068	144079		37.7	42.7385	41.5153	38.365	36.5733	61.2538	40.9541	33.7571	YGL192W
chrVII	144677	145443		69.69	71.7665	85.0854	79.8449	125.044	139.19	157.792	125.03	YGL191W
chrVII	145534	147944		46.84	45.0026	56.9202	54.8312	47.224	70.1997	58.9644	57.1634	YGL190C
chrVII	148158	148966	2_RPG	381.8	130.487	425.123	439.075	360.198	86.4684	408.546	450.152	YGL189C
chrVII	148603	148999		403.9	117.443	358.301	456.827	460.661	77.6399	481.114	495.471	YGL188C-A
chrVII	149401	150525		62.16	65.4969	89.5359	81.9896	103.133	81.6674	98.0366	96.141	YGL187C
chrVII	150993	152843		30.1	30.809	44.2418	43.7781	32.639	36.4357	33.1662	36.3406	YGL186C
chrVII	153041	154340		22.5	27.4002	35.6393	34.0762	29.8692	33.6758	29.623	33.0191	YGL185C
chrVII	154502	156273		7.516	6.25526	7.75363	4.9954	9.48221	9.8439	8.49883	7.11096	YGL184C
chrVII	157852	159229		20.98	31.1735	18.2689	17.9981	27.0475	44.7737	17.625	15.8412	YGL181W
chrVII	159875	163028		9.706	21.0144	8.62182	8.61367	9.79436	29.286	8.96758	9.63161	YGL180W
chrVII	163314	165180		12.9	16.6342	13.5934	15.5817	13.5298	47.2826	17.5466	16.5677	YGL179C
chrVII	166870	171108		36.13	46.0184	39.0143	37.1833	34.6266	65.1481	46.0766	36.0172	YGL178W
chrVII	174517	175446		23.27	31.4856	23.1931	23.4112	22.3994	33.9755	26.0317	25.8321	YGL174W
chrVII	175486	180444		44.36	57.2511	31.4491	31.8357	42.057	53.6821	37.198	33.5379	YGL173C
chrVII	180651	182213		36.3	43.9816	32.4919	33.8794	33.627	43.1683	31.6809	29.5264	YGL172W
chrVII	182353	184171	1_RiBi	37.62	43.4225	31.9952	32.962	25.6362	27.0226	33.6791	32.5881	YGL171W
chrVII	185981	187545		29.1	31.795	27.2619	27.2174	21.0478	25.7038	25.0913	24.9729	YGL169W
chrVII	187468	190902		42.42	45.4482	42.6541	41.3237	39.3224	45.4561	52.3381	46.6909	YGL167C
chrVII	191107	191967		17.33	19.285	21.8979	21.0059	18.7575	20.5635	18.8684	19.2007	YGL166W
chrVII	191890	193336		20.09	22.3969	27.9122	25.519	19.9541	18.9502	27.4614	27.6514	YGL164C
chrVII	193570	196702		17.34	23.2987	19.8854	18.067	16.2897	24.1654	18.3235	18.0217	YGL163C
chrVII	197976	199144		47.57	51.2583	64.7182	78.3959	44.4926	39.8575	63.2026	69.7082	YGL162W
chrVII	199063	200250		28.43	33.9013	29.175	33.1573	32.5889	39.8832	30.4957	28.9103	YGL161C
chrVII	200423	202407		13.89	16.9203	35.3448	29.1336	19.3817	30.4334	51.4626	41.0861	YGL160W
chrVII	202697	203916		17.55	19.0545	17.3443	16.9932	16.4149	15.0231	20.3915	17.6753	YGL159W
chrVII	206881	208660		2.738	3.70358	4.93758	4.8511	3.06614	6.59195	4.10048	4.3908	YGL158W
chrVII	208897	210142		25.21	29.1112	28.5288	29.6525	23.3426	34.1128	25.5705	23.7819	YGL157W
chrVII	210347	213726		15.53	18.7794	26.5949	23.5737	16.7268	19.6648	20.6633	21.417	YGL156W
chrVII	213941	215607		22.53	23.716	25.1978	24.9024	21.2583	21.7236	24.1598	24.5657	YGL155W
chrVII	215275	216099		14.03	17.4067	23.2159	24.6116	15.6544	19.8499	27.3241	25.0701	YGL154C
chrVII	216218	217347		20.66	23.9797	25.1679	26.2852	22.4148	22.5496	23.6003	24.2145	YGL153W
chrVII	217468	221015		21.65	24.8543	25.1964	23.3091	20.5796	27.6153	27.1271	23.8574	YGL151W
chrVII	220939	225762		30.03	33.723	34.0309	33.8477	29.0351	35.5118	29.9332	31.8358	YGL150C
chrVII	226294	227634		65.5	51.9225	55.2783	63.2541	62.012	37.9808	41.7451	57.5851	YGL148W
chrVII	227624	228375	2_RPG	418.9	185.52	473.718	507.011	325.875	107.132	330.625	363.807	YGL147C
chrVII	228443	229773		55.31	34.192	60.6724	72.7267	72.6218	32.7165	48.6848	70.8092	YGL146C
chrVII	230170	232468		16.9	16.3472	22.0118	21.2949	15.0294	18.8003	23.4431	23.2108	YGL145W
chrVII	234643	235991		18.68	18.7295	24.2492	25.6791	17.4654	17.0682	19.1573	23.5956	YGL143C
chrVII	236125	238163		14.94	16.6383	22.0219	25.5585	15.7452	17.281	22.505	25.1554	YGL142C
chrVII	238310	241214		13.2	19.3223	18.6987	18.9297	14.2834	22.5233	16.6978	18.2331	YGL141W
chrVII	241109	245198		22.99	25.2711	34.3785	32.5234	20.9458	22.3757	26.9864	30.1304	YGL140C
chrVII	245401	248459		16.94	17.8308	18.0956	18.9148	13.9558	18.9452	18.1127	20.0679	YGL139W
chrVII	249844	252910		50.62	50.3631	62.4726	56.663	45.347	50.0559	46.0813	51.981	YGL137W
chrVII	252784	253927		29.32	27.0467	51.0096	51.9999	26.474	26.6829	34.1742	45.4076	YGL136C
chrVII	254517	255388	2_RPG	378	165.883	479.435	492.531	344.627	85.7144	361.121	390.607	YGL135W
chrVII	255565	257072		29.99	29.5019	39.0423	38.1401	25.9664	31.5741	36.4154	36.0963	YGL134W
chrVII	257505	261689		23.48	30.5016	53.2295	48.4941	20.9866	30.6661	41.8148	46.4025	YGL133W
chrVII	261545	265930		13.55	17.2966	29.4168	25.52	12.8313	20.2849	22.1712	22.9575	YGL131C
chrVII	266083	267665		20.89	24.0766	38.4412	36.007	18.4037	27.9473	30.0821	35.4399	YGL130W
chrVII	267595	269188		23.02	24.9186	32.7252	29.8411	23.5108	29.6611	32.9029	34.9622	YGL129C
chrVII	269149	270169		22.25	25.9647	16.966	18.9139	28.7948	26.5786	20.7597	21.2338	YGL128C
chrVII	270242	270840		37.23	36.5646	22.8892	25.2726	44.2547	49.656	29.9306	28.8167	YGL127C
chrVII	270960	272395		24.1	29.0367	17.7909	22.3162	32.1701	33.1448	14.315	17.3293	YGL126W
chrVII	272377	274719		28.87	27.9501	42.7338	41.8329	43.6842	42.7153	35.8145	39.0852	YGL125W
chrVII	274763	276748		14.71	11.8587	31.4815	31.74	13.0095	14.4967	22.3937	24.8876	YGL124C
chrVII	277518	278469	2_RPG	431.4	171.552	506.159	536.145	399.392	90.9532	398.981	475.992	YGL123W
chrVII	278695	280568		87.41	115.252	70.1501	66.5423	81.1176	101.801	52.9688	53.6764	YGL122C
chrVII	280743	281277		35.94	48.1368	21.1552	27.6378	54.4762	54.2452	30.3365	28.0472	YGL121C
chrVII	281498	284002	1_RiBi	47.58	55.5352	36.0754	34.2027	34.8735	34.5201	34.6431	32.61	YGL120C
chrVII	284389	286080		15.1	18.5665	19.4575	19.5611	15.2223	18.1356	21.1155	19.1069	YGL119W
chrVII	288394	289421		44.76	39.8802	40.6254	38.9227	73.2579	43.7822	47.8589	54.3365	YGL117W
chrVII	289667	291746		30.61	31.966	13.0331	26.9861	26.7969	31.8213	30.8481	25.527	YGL116W
chrVII	291884	293083		36.67	37.1921	28.9887	32.7769	37.1821	37.257	33.2515	30.6635	YGL115W
chrVII	293205	295701		21.71	22.7536	36.4509	33.765	20.8641	22.3827	29.7	28.8679	YGL114W
chrVII	295895	298160		17.95	20.6951	19.2032	18.2211	14.6048	20.6726	23.6828	20.3099	YGL113W
chrVII	298032	299762		25.32	28.3824	21.4484	22.7059	23.0145	29.8184	26.872	23.1314	YGL112C
chrVII	299924	301521	1_RiBi	37.34	46.5886	32.2393	31.3829	26.4303	37.7428	38.1989	33.0324	YGL111W
chrVII	303527	304165		47.08	43.0308	60.1681	61.9825	52.4308	39.411	54.4391	62.4807	YGL108C
chrVII	304239	306331		28.34	31.5065	28.2807	30.3966	24.8837	32.7293	26.7412	25.6925	YGL107C
chrVII	306495	307258		59.46	58.522	62.9278	72.895	67.5291	53.2581	48.5073	57.8466	YGL106W
chrVII	307371	308669	1_RiBi	85.88	84.9464	114.53	100.116	78.0656	70.0111	82.2518	90.8091	YGL105W
chrVII	308549	310188		11.45	13.1302	25.0886	27.2584	12.0542	17.9465	18.8068	22.1592	YGL104C
chrVII	310929	312009	2_RPG	804	335.558	1004.11	1075.55	635.796	143.265	710.304	702.06	YGL103W
chrVII	312142	313092		64.36	66.2275	85.4715	80.7022	65.2383	61.7889	113.68	100.293	YGL101W
chrVII	313196	314373		26.79	28.3337	25.4025	28.639	26.5587	26.6731	24.8775	24.7106	YGL100W
chrVII	314563	316596		34.1	40.2714	28.4695	30.4091	23.3354	25.0571	28.5547	29.0278	YGL099W
chrVII	317283	318660		22.71	23.9449	24.6713	25.6553	22.0225	23.2548	24.698	24.3131	YGL098W
chrVII	321715	323361		42.03	48.7246	84.3462	89.1618	35.8576	43.6823	40.9728	50.5367	YGL097W
chrVII	325285	326280		7.859	13.1154	30.4111	39.2885	10.3874	28.043	30.3716	29.3026	YGL096W
chrVII	328780	330684		15.24	19.4835	19.586	18.6444	16.3204	29.2546	20.5757	18.1591	YGL095C
chrVII	330931	334653		23.45	29.0162	18.3387	15.6021	21.1014	33.9579	16.6029	15.2185	YGL094C
chrVII	334827	337678		21.64	27.9435	13.1971	13.2453	23.5011	32.9397	16.7522	15.087	YGL093W
chrVII	337770	341881		38.54	40.9871	40.6063	36.1287	29.1083	34.68	38.185	34.6802	YGL092W
chrVII	341897	343109		26.21	34.8216	29.3402	25.3667	25.7925	38.1928	31.5139	28.1737	YGL091C
chrVII	343277	344676		19.46	22.0833	23.1223	20.3824	28.8008	34.3787	26.0082	23.3138	YGL090W
chrVII	346289	346963		130.7	128.619	83.5551	91.8426	132.145	151.444	108.643	109.984	YGL087C
chrVII	347118	349454		29.29	32.4238	25.7576	23.7824	28.9962	45.0753	35.0319	29.8483	YGL086W
chrVII	349557	350668		20.73	22.187	25.7278	25.5042	22.4963	32.5999	26.7749	28.5778	YGL085W
chrVII	350526	352357		19.01	19.9891	19.4714	16.8732	18.8784	28.6959	19.8164	17.1315	YGL084C
chrVII	352944	355597		20.76	25.585	25.1083	24.6554	23.2176	37.9119	24.9601	24.528	YGL083W
chrVII	355736	357133		21.46	22.8568	22.7804	24.7396	22.1323	33.6711	21.3881	21.4526	YGL082W
chrVII	358555	359296		29.74	30.7483	20.4869	24.1885	39.7577	45.9874	29.7083	30.2698	YGL080W
chrVII	359401	360243		27.11	29.14	26.2571	27.1219	24.9183	33.2598	34.0496	29.5315	YGL079W
chrVII	360098	361941		72.31	84.6398	90.5806	79.6757	54.4285	82.8232	79.913	86.0465	YGL078C
chrVII	362133	364086		72.48	75.6244	68.9242	66.4145	70.4621	85.6853	68.8568	64.7446	YGL077C
chrVII	364225	366025	2_RPG	299.1	101.655	436.167	404.916	259.727	59.5371	378.294	419.753	YGL076C
chrVII	366569	368286		83.66	74.3212	53.0738	60.835	98.4098	76.49	71.517	84.9423	YGL075C
chrVII	368445	371313		44.73	59.4579	38.203	37.5333	44.0252	65.0967	30.3771	32.2861	YGL073W
chrVII	371549	374328		50.48	46.1229	63.2317	48.8621	38.6757	44.7672	40.3273	39.4507	YGL071W
chrVII	374126	374863		60.78	63.1382	47.2653	51.578	63.7632	70.2713	62.8817	50.9922	YGL070C
chrVII	375039	375781		54.12	56.1127	39.8009	48.1371	56.1529	67.1727	46.7319	44.4168	YGL068W
chrVII	375993	377280		27.22	31.6576	25.2991	28.9415	28.6414	36.7938	29.5026	29.7333	YGL067W
chrVII	377417	379812		24.28	28.0195	25.109	25.2865	22.8799	33.9219	23.0545	22.1975	YGL066W
chrVII	379705	381326		22.95	25.2334	22.4565	21.8799	19.9605	29.4711	23.9654	20.4625	YGL065C
chrVII	381468	383219		19.55	23.8005	20.3624	21.0521	17.8542	26.3015	19.9753	17.9069	YGL064C
chrVII	383422	384885		25.01	29.0847	18.2113	22.56	26.069	34.5823	16.5778	16.1173	YGL063W
chrVII	388868	389783		21.82	24.4326	18.1382	20.4595	21.6974	25.1465	16.1581	13.5697	YGL061C
chrVII	389934	392038		13.49	16.336	14.2674	14.7455	13.7097	22.3435	16.016	12.3939	YGL060W
chrVII	393889	394726		46.43	55.5847	44.5361	42.9152	48.6095	73.3388	47.1029	43.7085	YGL058W
chrVII	394805	395835		21.4	27.942	23.8317	24.6539	21.964	31.7539	28.5779	25.3095	YGL057C
chrVII	395944	397715		54.51	67.6431	52.8446	51.7298	43.9722	65.9933	59.4521	55.812	YGL056C
chrVII	398280	400385		169.4	150.493	135.588	153.092	144.95	229.47	732.004	668.937	YGL055W
chrVII	400287	401367		66.34	65.3224	53.8617	56.6499	75.8706	82.6232	160.756	127.852	YGL054C
chrVII	402486	403469		15.16	20.4552	18.0003	21.9947	17.5114	30.9395	24.3999	21.072	YGL053W
chrVII	403677	404855		14.89	18.0138	11.2274	16.0954	16.755	21.3399	16.8396	14.3759	YGL051W
chrVII	405731	406736		29.42	30.8691	28.3429	30.1364	26.3653	40.9236	34.9717	29.7923	YGL050W
chrVII	406473	409777		20.83	26.7884	30.9383	28.8424	21.0285	39.4577	35.9163	28.7195	YGL049C
chrVII	409972	411313		51.11	84.167	28.0132	27.1958	53.9084	102.845	29.5274	24.3272	YGL048C
chrVII	411464	412203		51.35	73.2283	30.3306	40.0932	67.5784	92.8968	45.9209	37.102	YGL047W
chrVII	413763	415931	3_MSN2	14.35	15.3024	53.466	46.2437	17.7666	27.6462	40.7917	40.7738	YGL045W
chrVII	415864	417260		22.03	28.8723	20.6926	21.7749	22.5733	36.3393	25.5333	21.2027	YGL044C
chrVII	417460	418620		45.83	49.4468	41.4375	38.252	38.113	46.9771	38.3491	35.1746	YGL043W
chrVII	418764	419411		33.63	37.2554	31.1174	33.1436	38.503	42.3471	40.2876	32.4128	YGL041W-A
chrVII	419321	420708		47.3	60.1645	58.4065	54.292	52.16	77.2326	70.5427	64.4097	YGL040C
chrVII	423819	425130		29.16	33.0998	39.6052	32.2933	25.748	52.4792	68.2579	52.7887	YGL039W
chrVII	425073	426848		41.41	47.3015	34.0812	39.396	40.3553	61.8079	43.6494	31.5022	YGL038C
chrVII	427155	428066		37.78	61.0729	34.3452	60.2947	78.0323	277.749	53.8123	40.0684	YGL037C
chrVII	428559	431443		16.07	20.9419	33.1088	31.334	15.3277	33.3908	28.729	21.4064	YGL036W
chrVII	431292	433176		35.14	44.5597	13.9483	15.7665	33.3054	60.4351	17.057	15.6	YGL035C
chrVII	437401	438397	2_RPG	309.6	99.8849	404.888	391.353	259.369	34.0338	341.036	393.499	YGL031C
chrVII	438944	439738	2_RPG	573.1	217.318	546.714	611.205	542.811	116.583	579.377	606.304	YGL030W
chrVII	439995	440658	1_RiBi	67.21	65.3905	45.6328	57.6187	50.5778	52.804	69.1363	62.4863	YGL029W
chrVII	440980	443391		137.1	129.614	128.749	130.595	210.604	145.099	215.359	229.997	YGL028C
chrVII	443548	446173		25.99	25.5834	31.7371	27.7697	24.1598	27.0842	29.1027	27.984	YGL027C
chrVII	446329	448578		43.1	49.2514	49.7083	49.441	45.3772	47.0076	43.2789	43.2003	YGL026C
chrVII	448706	449994		30.53	37.8477	32.7759	33.2319	34.3783	31.8104	24.0432	26.3689	YGL025C
chrVII	450068	452152		23.16	31.6058	25.0692	30.4439	20.9971	28.0521	20.3845	21.3534	YGL023C
chrVII	452309	454733		44.7	50.7917	31.0028	36.5635	44.691	51.0589	32.1562	28.5013	YGL022W
chrVII	454784	457171		31.69	34.3206	19.5235	28.9976	35.2417	34.2846	44.4079	35.1345	YGL021W
chrVII	457082	457933		32.21	30.043	30.0532	32.4411	32.8503	33.3441	37.2118	34.192	YGL020C
chrVII	458060	459102		37.42	48.6126	43.9755	47.3576	41.4883	45.9256	40.0428	45.8486	YGL019W
chrVII	458778	459698		25.22	29.6925	34.7198	35.1642	24.2077	30.9255	32.9645	34.0041	YGL018C
chrVII	459826	461453		19.62	23.7014	27.2131	29.8208	17.4172	26.2012	25.6155	27.6343	YGL017W
chrVII	461596	465119		15.94	19.9069	13.2981	15.8091	12.9327	22.622	21.6039	17.2474	YGL016W
chrVII	465727	468903		40.66	45.9981	40.8283	38.0706	34.8365	45.6405	43.1015	37.5732	YGL014W
chrVII	469053	472432		30.2	44.2651	20.8442	19.8159	26.2924	44.1393	24.8187	20.4786	YGL013C
chrVII	472805	474373		36.09	52.0148	51.8198	45.385	33.8123	64.4482	42.8923	33.1296	YGL012W
chrVII	474360	475282		75.95	108.343	31.7295	32.3773	76.1534	117.781	34.4741	31.2818	YGL011C
chrVII	475475	476242		41.62	69.1129	22.8776	25.959	50.0241	81.4204	30.7378	29.3099	YGL010W
chrVII	476169	478730		102.9	125.57	26.5245	32.8342	120.926	120.614	58.2854	51.2716	YGL009C
chrVII	479394	482901		712.9	626.403	380.239	455.483	673.805	228.926	378.598	472.079	YGL008C
chrVII	485453	489577		12.39	19.6032	13.3337	14.0832	13.562	24.0783	17.4486	12.9568	YGL006W
chrVII	489492	490575		20.25	23.7597	18.5192	19.5844	21.4798	32.0638	25.501	19.4257	YGL005C
chrVII	490740	491978		21.11	26.3977	16.4179	19.7282	21.531	33.2854	18.1701	15.8392	YGL004C
chrVII	492325	494276		28.56	37.591	22.674	23.9243	28.3816	38.0296	21.5971	21.0097	YGL003C
chrVII	494405	495340		27.83	32.5087	21.4602	23.2224	36.9672	35.1469	29.9975	26.3393	YGL002W
chrVII	495328	496610		33.91	36.982	69.8541	62.7505	42.3696	45.247	91.6886	102.362	YGL001C
chrVII	497064	498051		48.01	45.6643	36.8499	38.0553	44.4083	34.5632	46.31	45.1313	YGR001C
chrVII	498228	499914		30.42	33.0277	33.1781	33.4529	27.2689	31.8012	34.0376	31.7931	YGR002C
chrVII	500103	502612		20.88	23.4734	19.1799	17.0901	15.2022	22.1316	21.5877	19.058	YGR003W
chrVII	502909	504574		17.69	18.1406	12.1887	12.4786	16.165	17.0638	17.9929	17.3139	YGR004W
chrVII	504552	505888		26.52	31.1721	21.5882	21.4572	27.2643	33.6929	25.3504	26.9776	YGR005C
chrVII	506922	508081		43.37	56.2389	40.5522	38.9486	47.805	54.5355	35.8721	39.2024	YGR007W
chrVII	507971	508544		21.19	30.9534	23.3262	34.5577	47.3088	60.6724	27.9905	32.4261	YGR008C
chrVII	508993	511072		27.62	36.9074	24.278	23.2446	29.3469	48.8051	22.2928	23.1222	YGR009C
chrVII	511421	513004		27.25	32.445	18.9101	19.4953	28.1541	30.7462	18.1373	19.0004	YGR010W
chrVII	513129	514373		23.38	26.7368	17.062	19.0877	22.4023	26.0084	14.7397	16.4744	YGR012W
chrVII	514530	516684		33.75	38.4165	30.7554	34.4673	43.2358	34.017	27.5044	30.3863	YGR013W
chrVII	516667	520991		65.6	74.9173	50.2156	60.9594	56.1993	44.0469	41.5633	38.1817	YGR014W
chrVII	520982	522094		27.26	30.0582	20.5413	22.6057	30.348	35.9622	26.8396	27.6097	YGR015C
chrVII	522237	522989		26.22	23.1692	16.4955	19.1618	27.2748	30.9329	26.1209	21.1949	YGR016W
chrVII	523532	524795		59.01	64.4035	45.4953	48.1592	57.1876	65.7981	47.7238	47.6729	YGR017W
chrVII	525190	526737		25.53	36.5023	37.2695	52.6375	41.6211	58.2408	59.6156	49.6652	YGR019W
chrVII	526838	527441		53.54	59.3588	43.5836	54.2854	72.9771	71.7842	71.0252	55.7667	YGR020C
chrVII	527583	528583		26.35	39.034	28.2602	38.9318	34.5724	41.1528	30.581	32.3057	YGR021W
chrVII	529106	531172	3_MSN2	15.56	23.5911	37.7411	43.0852	17.3935	31.1852	33.4065	31.3041	YGR023W
chrVII	531800	532649		34.09	34.4105	30.1498	31.1659	35.2455	38.2691	39.1747	33.5629	YGR024C
chrVII	532805	534080		48.14	38.4446	51.3186	51.8413	45.217	43.6883	55.112	59.0298	YGR026W
chrVII	534068	534785	2_RPG	385.1	137.095	424.4	405.661	341.719	70.7332	382.273	460.808	YGR027C
chrVII	542039	543439		15.21	17.0166	19.117	20.8445	19.3741	24.4645	20.3577	21.4933	YGR028W
chrVII	543528	544301		22.92	26.6652	25.8251	30.6655	26.4317	30.3214	31.1908	32.1733	YGR029W
chrVII	545432	546170		134.2	113.123	76.3456	86.6602	100.077	111.61	113.639	113.007	YGR030C
chrVII	546354	547779		31.14	41.4788	19.4668	24.1809	33.3688	55.4699	19.0594	23.9611	YGR031W
[truncated: 3,046 more rows]
