# Supplementary material for: A ribosome assembly stress response regulates transcription to maintain proteome homeostasis
Source: eLife. 2019 May 24;8:e45002. doi: 10.7554/eLife.45002 (PMC6579557; doi:10.7554/eLife.45002)
Supplement: Supplementary file 6. [file elife-45002-supp6.xlsx]

## Sheet: Feuil1
Supplementary File 6
Rpb1 ChIP-seq in wt cells following either Vehicle (Veh) or Rapamycin (Rap) addition, Cycloheximide pre-treatment (CHX), or Heat Shock at 40°C (Heat Shock). Category (cat): Hsf1 genes (Hsf1), Ribosome Biogenesis genes (RiBi), Msn2/4 genes (Msn2), Ribosomal Protein Genes (RPG). Position of each ORF in the chromosome is indicated (Chr, Start, End).
#chr	start	end	cat	5min Veh	20min Veh	5min Rap	20min Rap	5min CHX Rap	5min CHX	20min CHX Rap	20min CHX	Heat Shock CHX	Heat Shock Veh	No Heat Shock CHX	No Heat Shock Veh	name
chrI	1788	2191		0.635906	0.376526	0.595782	0.438189	0.614194	0.627469	0.969429	0.685707	0.667816	0.652903	0.603127	0.66129	YAL068C
chrI	11698	14645		16.0356	16.5593	18.8929	20.012	16.9661	14.1424	23.0474	17.5413	11.3191	15.1917	16.2684	17.9818	YAL064C-A
chrI	21341	21981		2.69016	3.61037	3.86122	4.58564	3.61827	3.07992	4.12739	3.71787	11.9573	8.673	3.83823	3.06841	YAL064W
chrI	23940	28043		10.8276	11.2538	12.72	15.1202	11.381	9.81564	17.0415	11.382	8.30291	10.1447	10.9317	11.6626	YAL063C
chrI	31187	33041		27.4722	27.6585	47.6763	63.2297	33.6535	14.3954	196.142	15.2361	25.5083	33.9477	15.5783	22.356	YAL062W
chrI	33222	34864		40.4999	43.4619	90.8255	84.7633	57.245	31.8622	110.151	32.1134	91.3189	197.488	25.3305	28.836	YAL061W
chrI	35056	36421		59.5838	61.2237	105.053	151.958	98.1331	54.5046	257.942	66.1343	252.816	242.481	48.8999	51.0715	YAL060W
chrI	36508	37275		58.6048	51.2351	11.1894	9.62098	17.6691	46.562	12.9314	37.6659	16.1969	9.6825	50.1658	56.2565	YAL059W
chrI	37379	39106		16.2497	15.745	13.759	20.1424	16.1476	15.1883	35.3051	16.6389	11.8042	10.7881	16.3692	15.9727	YAL058W
chrI	39204	42030		21.325	22.5369	29.2752	36.8288	26.3236	20.3634	41.2492	23.3599	19.7125	24.7846	23.0295	23.9842	YAL056W
chrI	42154	42862		21.0334	19.3985	25.3906	34.8639	15.1277	12.063	26.4569	15.5904	17.2724	25.3709	11.6021	18.2223	YAL055W
chrI	45743	48316		24.7249	25.6087	24.5981	59.9822	60.9119	56.4391	135.027	62.814	30.7245	24.1007	43.9523	29.2359	YAL053W
chrI	48538	51858		17.0071	17.6295	18.351	20.2118	23.8633	23.7969	29.4134	24.6061	20.1008	17.7783	27.3859	19.4029	YAL051W
chrI	51739	52660		25.4063	26.2821	36.4687	50.3449	44.1914	32.6821	67.881	34.6822	32.3756	34.519	33.5212	27.3721	YAL049C
chrI	52729	54798		16.4376	17.1092	19.2087	28.2453	21.5778	19.3803	29.5675	20.5117	17.0093	17.0045	17.3954	17.3387	YAL048C
chrI	54925	56885		12.5502	12.6088	11.8977	16.5723	13.3592	14.8873	14.3316	13.3438	8.49597	9.27753	15.8782	12.4778	YAL047C
chrI	56919	57390		37.7976	32.7649	39.2208	53.8392	40.5818	33.7727	64.0961	30.4079	23.3934	26.1336	29.2775	29.5688	YAL046C
chrI	57480	57963		24.3783	28.5789	33.7796	55.908	36.7295	30.0461	73.6586	31.4293	24.0759	28.3552	24.041	22.9749	YAL044W-A
chrI	57867	58475		36.7385	41.2197	60.0249	134.518	78.0227	50.276	280.376	59.7501	50.9204	49.8601	38.8611	28.1281	YAL044C
chrI	58632	61092		36.0647	33.692	34.6862	30.8648	32.3156	31.5026	55.4874	37.2642	23.3032	24.6827	36.1408	37.3401	YAL043C
chrI	61268	62656		50.552	45.7825	53.5667	45.0131	35.9413	31.4419	61.8999	33.7118	26.9553	40.0056	36.8387	50.2241	YAL042W
chrI	62775	65464		35.7038	33.6499	36.8825	34.5925	36.2636	34.5479	39.5833	38.8434	29.5984	36.1803	37.486	37.1163	YAL041W
chrI	65381	67849		107.886	107.363	141.503	80.7047	94.1271	75.9421	54.7569	77.8751	66.2242	72.4243	93.5207	107.091	YAL040C
chrI	68648	69599		57.9834	54.6235	105.07	96.0255	95.8213	56.2035	155.836	63.0768	105.95	100.646	53.2529	53.7469	YAL039C
chrI	71643	73454		710.372	673.939	503.357	530.416	431.107	660.287	745.965	579.117	353.009	809.533	643.873	708.071	YAL038W
chrI	73838	74859		9.66138	9.50745	9.37217	19.3886	11.7429	10.4609	23.4861	12.5661	9.44026	7.41264	10.6505	9.40011	YAL037W
chrI	74852	76198		59.7861	55.0051	8.27534	6.8099	13.4789	50.9787	5.06501	44.3901	9.8697	3.44496	61.045	61.4083	YAL036C
chrI	76400	79562	1_RiBi	85.5431	82.5791	38.7987	28.2567	46.5567	85.8349	24.953	88.4281	38.6159	22.3713	101.275	97.9372	YAL035W
chrI	79673	80669		22.3143	26.5603	27.9462	30.2532	18.4602	15.3925	22.4512	18.5082	18.766	26.8209	17.3882	25.8544	YAL034W-A
chrI	80566	82584	3_MSN2	23.4556	25.0309	36.0848	46.4591	30.162	22.0078	56.1284	24.6705	56.6553	93.917	21.9244	23.3121	YAL034C
chrI	82684	83301		41.7382	39.586	39.8124	38.2167	27.7176	33.1797	26.5912	24.6829	19.3205	17.5946	32.3485	36.4112	YAL033W
chrI	83276	84506		34.0607	32.6945	40.5701	39.3091	29.3303	22.4022	46.0558	25.0945	23.1663	38.3508	25.6233	34.3896	YAL032C
chrI	84639	87077		17.8467	19.3004	26.2419	30.0479	28.0319	19.9962	44.0033	23.645	25.3829	30.1119	19.0746	19.155	YAL031C
chrI	87249	87857		26.5284	24.6552	48.0128	60.0219	46.752	27.5822	67.2321	29.8546	41.3662	56.3459	22.4731	22.2481	YAL030W
chrI	87756	92523		27.6007	27.1038	19.8263	15.9833	21.8483	24.9083	22.9811	27.6143	18.8823	12.8463	26.4791	30.9205	YAL029C
chrI	92848	94539		11.3748	12.4981	20.49	24.28	27.6044	22.5123	43.0787	28.6552	38.0873	20.7681	18.928	9.42377	YAL028W
chrI	94606	95579		22.1946	22.2087	27.0966	37.4741	25.7967	22.6232	29.4881	23.0926	23.3004	22.9799	20.0791	21.1914	YAL027W
chrI	95481	99782		15.2337	15.1298	16.4924	18.5294	19.2138	17.1439	21.2875	19.882	15.5659	16.408	16.5989	16.8357	YAL026C
chrI	100037	101173	1_RiBi	90.0803	83.811	7.95635	1.89938	20.9289	83.2149	9.37326	73.7704	13.2358	1.59621	108.088	98.5507	YAL025C
chrI	101279	105965		18.6497	18.5575	17.7587	13.4966	14.2452	15.2271	13.8857	16.6502	12.6576	11.8659	15.3442	20.7424	YAL024C
chrI	106141	108695		71.635	71.0762	64.7636	42.9951	34.9531	40.3826	29.0059	45.0214	33.9308	64.372	46.5123	78.1114	YAL023C
chrI	108876	110462		24.1944	23.0561	25.6204	33.3147	25.5926	26.553	29.8312	30.3046	19.6159	15.1884	28.01	23.6744	YAL022C
chrI	110631	113419		33.0623	33.256	35.5401	35.0556	28.4178	24.5367	32.1809	30.2112	29.2688	29.2849	27.576	36.2346	YAL021C
chrI	113535	114629		38.8195	37.0843	32.6374	24.6964	23.0086	25.8502	19.9773	25.5068	17.5054	18.1852	26.014	34.3208	YAL020C
chrI	114808	118365		30.3706	29.6639	12.6394	8.03171	15.2477	24.887	8.28336	25.0172	9.91236	5.99597	33.2411	36.4564	YAL019W
chrI	119857	124484		12.8197	14.6334	29.2489	36.0468	23.9087	11.7608	36.8591	17.4962	45.1759	50.7508	11.2956	14.2951	YAL017W
chrI	124781	126856		45.6207	44.0841	56.6148	55.0801	48.4833	35.4524	45.2651	41.4385	41.0199	56.7622	38.7809	46.6144	YAL016W
chrI	126769	128102		20.5944	19.7693	23.5885	30.924	23.6284	23.28	33.6508	24.0345	23.978	23.5924	22.4983	20.0223	YAL015C
chrI	128086	129071		46.5057	46.9163	55.1508	63.6023	46.2375	42.4419	58.8346	41.0627	37.6883	49.604	41.0137	45.942	YAL014C
chrI	129209	130589		47.9604	45.9242	52.6278	52.446	39.5099	33.7644	53.4354	36.3305	29.9861	44.1021	37.4861	43.2805	YAL013W
chrI	130734	132084		148.553	142.01	94.8776	48.6104	41.4195	55.0184	66.1163	59.4601	52.7668	87.5761	56.8992	150.7	YAL012W
chrI	132184	134174		24.0846	25.2239	22.2512	21.2279	20.7304	22.0613	22.7524	22.7976	13.5183	19.5396	26.8268	26.8799	YAL011W
chrI	134086	135705		19.6888	18.4002	20.8844	25.5972	22.1842	21.1477	22.8363	19.7373	18.0573	20.4427	22.9989	19.2508	YAL010C
chrI	135828	136758		23.0053	25.6894	27.6124	34.4439	24.612	23.4587	22.7494	20.4344	29.5464	30.9809	23.5764	22.2047	YAL009W
chrI	136834	137644		17.6383	20.4538	30.3162	37.2689	21.7514	13.2749	19.7493	15.9904	49.3415	55.2798	15.039	17.1436	YAL008W
chrI	137546	138452		53.7223	56.4757	59.6728	52.4106	29.8324	26.4468	25.0242	23.0926	29.6331	56.7091	28.8077	52.8157	YAL007C
chrI	139355	141660	4_HSF1	295.064	331.592	601.523	114.162	29.4696	32.6992	78.8806	34.4989	890.447	859.636	38.8156	326.857	YAL005C
chrI	142116	143370	1_RiBi	530.7	527.537	307.57	110.18	152.269	344.52	52.5712	271.298	684.809	882.329	398.262	566.613	YAL003W
chrI	143615	147587		14.5829	15.259	19.0312	15.8653	12.8114	11.7162	11.848	14.0318	11.8833	15.6324	12.8355	14.7419	YAL002W
chrI	147560	151202		18.6316	20.4199	25.8583	29.081	15.3768	11.6662	18.516	13.7257	13.7395	24.9533	15.4652	20.2373	YAL001C
chrI	152214	153976		35.8762	35.0259	26.5712	28.1445	24.0929	28.9012	37.1983	33.5699	19.3699	20.3239	32.5409	37.4673	YAR002W
chrI	153932	154827		57.8301	57.2653	47.4216	44.9473	27.881	32.8402	27.5767	29.812	22.3208	34.9701	34.0995	52.939	YAR002C-A
chrI	154919	156781		23.7961	25.5942	25.3592	22.5711	17.7778	17.2304	21.9389	18.0095	14.3329	20.9462	17.8287	25.9386	YAR003W
chrI	156679	158688		31.3897	35.4264	43.8662	52.6105	14.3104	9.72729	27.4673	10.1444	11.9266	36.9404	13.0159	33.234	YAR007C
chrI	158846	159881		30.933	32.8	30.0518	39.8556	12.3607	13.0441	23.1578	10.4996	5.5292	10.4591	17.2088	30.6926	YAR008W
chrI	166567	169020		33.7994	33.1018	27.0715	26.4399	22.7549	25.3537	40.0756	27.0153	14.2597	17.7948	30.7781	36.0112	YAR014C
chrI	169223	170392		22.44	20.4795	15.8548	36.3044	22.6826	25.8287	83.5531	26.6206	16.7252	10.0091	26.5712	21.0641	YAR015W
chrI	170262	171737		23.1115	22.9479	21.806	27.5322	20.9238	20.5299	13.5988	19.939	10.1933	15.7308	26.1896	20.3563	YAR018C
chrI	172135	175167		13.1361	12.9394	18.0863	21.0926	17.4406	12.3256	25.4245	14.9972	15.1658	23.3419	13.245	13.2332	YAR019C
chrI	176662	177189		6.96106	5.68782	7.49065	9.07008	15.7222	13.9552	21.0323	13.6659	19.7997	9.77831	11.6059	7.41216	YAR020C
chrI	183698	184655		25.8524	25.5145	40.4875	51.0201	42.3144	25.5634	67.427	28.6833	59.0703	46.5341	23.6469	21.6592	YAR027W
chrI	184812	185793		17.5592	16.7422	19.7935	15.784	30.4787	25.1348	50.5837	24.0465	26.1062	17.042	21.6972	15.515	YAR028W
chrI	188048	188963		25.7803	23.2303	25.3764	22.7503	22.0776	20.4931	17.9586	18.3853	16.543	17.4231	20.2842	21.0879	YAR033W
chrI	190138	192572		6.27285	6.60482	8.43872	10.5829	13.9481	15.758	22.7072	22.408	9.03769	6.0015	11.8897	5.03356	YAR035W
chrI	192564	196350		27.9665	28.1644	31.246	26.5108	23.7389	23.5229	26.7439	28.2893	28.3733	33.1551	28.844	31.5507	YAR042W
chrI	203375	208127		10.973	11.1666	11.6478	11.4865	12.2838	10.9623	18.7958	12.5907	8.87946	8.58253	11.94	11.6202	YAR050W
chrI	225158	226914		17.4527	15.835	18.5907	19.5399	23.35	23.2594	16.7614	16.7951	12.1392	10.5933	39.922	16.7793	YAR071W
chrII	7622	7982		0.235861	0.172556	0.138167	0.230111	0.43775	0.26625	0.81875	0.342694	0.376444	0.243806	0.0611389	0.169222	YBL108C-A
chrII	9818	10551		40.773	41.9215	40.8485	45.5108	25.7231	31.2851	27.9412	28.1797	14.3453	22.5731	29.3894	43.7759	YBL107C
chrII	10719	13945		11.5631	10.8907	10.3951	10.7062	13.4849	13.3208	19.0694	16.4879	9.83027	7.55147	13.9559	13.0165	YBL106C
chrII	13988	17964		26.0943	25.8124	28.8567	28.3836	29.3775	25.6831	32.3842	29.633	20.1378	24.4666	29.1785	29.438	YBL105C
chrII	18146	21315		19.0502	18.6295	19.292	21.0342	22.2003	20.3927	25.5312	22.3783	13.1136	14.6446	21.2767	21.2876	YBL104C
chrII	21619	23801		24.2241	23.5467	24.9258	33.3186	28.6509	24.8619	31.1819	28.724	17.3768	19.2356	26.8206	25.8811	YBL103C
chrII	23979	24894		30.4165	32.9261	46.5195	54.3078	39.0408	31.6987	46.2889	33.856	37.496	43.3137	26.8398	29.3808	YBL102W
chrII	24779	28605		16.5987	16.6968	30.0371	48.5437	21.3119	14.0451	57.4559	20.2648	30.8833	36.9549	13.6925	17.5187	YBL101C
chrII	36735	38964	3_MSN2	78.6473	89.5176	119.638	83.7323	70.8517	39.489	73.755	47.4351	49.1217	110.306	51.9913	91.9616	YBL099W
chrII	39114	40626		9.76739	10.4206	9.96524	11.7669	22.0324	25.1132	17.6862	23.1898	21.4838	6.74915	19.141	8.95203	YBL098W
chrII	40772	43100		30.2623	30.1558	32.2551	30.1892	31.5248	32.7849	23.7606	31.0323	18.0268	18.679	35.9361	34.5492	YBL097W
chrII	43260	44209		32.4258	32.8566	45.6877	45.56	101.966	81.3923	100.072	81.3219	63.7003	40.0982	71.0627	36.237	YBL095W
chrII	44105	45016		38.7513	41.4628	37.996	42.3214	56.147	59.7124	81.9261	58.9127	39.7761	29.7703	54.3989	35.7898	YBL093C
chrII	45514	46440	2_RPG	558.345	547.77	167.084	39.9938	581.713	744.137	81.5984	652.861	320.349	11.585	713.17	534.33	YBL092W
chrII	46494	47192		59.3734	58.3616	54.3529	49.1564	74.3941	69.8878	44.2724	78.191	69.5854	39.688	73.6496	59.4522	YBL091C-A
chrII	47272	48694		30.34	29.8499	35.5563	35.9661	39.8542	33.2271	44.3095	35.2035	29.3254	28.5617	37.7206	30.4788	YBL091C
chrII	48793	49478		47.6732	50.2396	54.8229	67.3979	47.5697	40.9221	51.1407	34.9707	36.4994	37.2837	36.3176	45.2464	YBL090W
chrII	49557	51025		23.0988	22.3593	28.2121	44.8763	29.0857	22.7953	34.4075	23.591	20.8589	21.1439	22.5121	22.3484	YBL089W
chrII	50930	59654		13.6266	14.2704	13.4623	13.789	17.5635	17.2575	13.4419	20.0681	15.6416	10.6744	19.5883	15.2489	YBL088C
chrII	59721	60821	2_RPG	258.411	247.02	71.6824	23.3636	224.498	337.853	31.3782	296.275	155.309	8.25957	347.009	248.839	YBL087C
chrII	61159	62682		20.16	20.2837	39.7386	30.7056	37.2555	21.0879	32.4645	26.8429	61.14	63.8034	22.8232	17.7984	YBL086C
chrII	63684	66936		27.7573	29.2802	35.8488	27.7579	22.336	17.6384	24.5588	20.916	21.7599	37.4921	21.7236	32.7432	YBL085W
chrII	67042	69568		19.4384	19.6087	23.3287	19.7939	20.4923	18.3564	19.8096	20.1045	18.8778	24.4168	19.5007	19.5228	YBL084C
chrII	69657	71172		24.2288	22.4335	13.8886	13.8339	14.5276	20.0661	12.3575	20.7598	8.72417	6.30253	25.783	26.0041	YBL082C
chrII	71551	73031		56.1367	53.5421	20.328	11.7203	28.2695	56.821	11.4749	58.1035	25.6049	10.6979	72.9621	63.6714	YBL081W
chrII	72984	74710		15.2285	14.4459	18.1269	25.1838	15.5756	12.4843	20.3543	13.1521	13.9029	18.4094	12.7859	15.0662	YBL080C
chrII	75195	80047		31.7962	29.0394	23.8145	19.1592	24.0915	28.6426	19.671	31.0797	17.8744	18.1162	35.5686	37.3783	YBL079W
chrII	79893	80790		12.7526	14.4687	41.0546	86.992	41.8035	16.797	55.2263	21.6767	52.0755	58.5241	16.0533	14.4536	YBL078C
chrII	80951	84306	1_RiBi	85.0792	80.1119	37.3626	45.0874	56.5336	100.724	26.8909	100.754	45.8898	17.6625	122.016	99.8952	YBL076C
chrII	88414	89500	2_RPG	411.618	398.31	136.067	37.4822	411.757	523.443	73.2567	478.245	272.093	62.022	515.321	404.075	YBL072C
chrII	89942	90474		88.3402	78.7115	17.2902	9.98788	44.9928	122.433	16.0528	96.8115	22.9212	6.63609	108.668	79.6433	YBL071W-A
chrII	90630	92172		30.6245	29.6057	15.1793	11.6145	34.9745	49.2265	15.977	46.6668	28.1096	8.99261	49.8071	30.8215	YBL069W
chrII	92335	93524		35.1279	32.8097	8.68216	6.27614	20.9471	44.7578	9.23653	39.3997	13.7783	3.70868	45.1109	34.5921	YBL068W
chrII	93550	96168		22.1662	20.4032	15.7367	18.9629	17.0096	21.454	13.2573	20.4775	13.2914	13.1375	25.033	24.6476	YBL067C
chrII	96338	100155		23.4767	24.4796	25.6887	24.5765	27.4118	25.8057	33.2028	30.3009	24.4164	24.8654	27.3412	26.3606	YBL066C
chrII	100298	101223		20.4656	25.6925	66.2926	60.0858	39.4103	19.3335	46.8657	25.315	83.9959	140.444	13.9767	19.3651	YBL064C
chrII	101868	105325		12.7702	12.8215	16.9767	17.3193	12.263	10.8319	10.7628	12.3614	8.35009	11.8126	10.8465	16.1334	YBL063W
chrII	105211	107505		31.3791	31.1464	24.7352	38.5913	45.5861	56.9929	65.6854	61.1579	21.0973	14.1974	47.0661	35.8575	YBL061C
chrII	107894	110041		18.0927	18.0487	15.2717	16.4723	20.7663	26.4948	27.4946	29.7594	9.07787	12.2159	26.4492	20.4621	YBL060W
chrII	109880	110570		34.2189	36.3893	39.7482	50.0462	37.8557	38.8417	33.6877	36.5218	25.1588	25.8069	29.5261	28.9973	YBL059C-A
chrII	110593	111357		42.3859	45.8829	51.77	58.845	46.0035	43.8515	43.0171	39.2506	30.5576	32.5171	30.5357	37.3763	YBL059W
chrII	111395	112826		47.3262	46.4979	69.778	59.7784	42.703	27.421	54.7585	31.1511	50.6235	73.9741	25.84	49.2873	YBL058W
chrII	112728	113457		40.2536	39.3425	42.3309	40.9182	36.0299	36.7092	38.6337	34.4755	27.7321	34.1554	31.2368	38.3086	YBL057C
chrII	113625	115562		55.0678	56.1763	63.4298	58.557	52.0139	45.6787	46.5984	51.4186	43.2276	58.8632	45.8635	57.3076	YBL056W
chrII	115476	116829		27.9046	26.4288	15.3456	13.8348	20.0181	31.3842	19.1286	30.3388	14.4899	16.223	31.5702	29.5883	YBL055C
chrII	117473	119361		39.9376	34.5219	2.56802	2.61259	10.3203	50.3351	10.0749	39.1848	6.58841	1.94892	54.5135	45.2798	YBL054W
chrII	119304	122140		18.9653	19.0651	16.8438	14.8843	17.6551	19.4497	18.7501	21.4646	13.4705	10.0612	17.6754	20.7358	YBL052C
chrII	122305	124843		35.7624	36.4816	34.727	30.5734	37.3425	37.3133	43.4812	41.0852	30.4358	27.4685	37.7073	38.6724	YBL051C
chrII	125037	126182		31.5928	32.7421	53.0327	71.6885	46.9989	29.5453	99.7844	32.1301	42.1529	53.3391	26.1095	30.0292	YBL050W
chrII	127685	132205		35.0095	35.4994	57.3138	61.4047	43.8422	24.7952	58.5179	33.5681	52.6637	68.3964	28.9528	37.6375	YBL047C
chrII	132402	134043		26.9734	26.6046	31.3619	29.7962	30.404	27.9001	46.1248	29.6148	29.0253	23.4817	28.85	29.7843	YBL046W
chrII	133813	135701		49.7092	59.9137	71.5432	56.78	42.9202	27.6689	60.3857	31.6591	48.3756	86.0051	33.2907	57.6867	YBL045C
chrII	136488	137611		7.82012	8.01794	9.14471	14.8903	12.3068	13.2511	16.4547	13.3503	13.4706	7.1802	11.8446	7.52636	YBL043W
chrII	138076	140348	1_RiBi	62.0126	58.3077	94.3442	25.9719	47.3377	29.7088	33.6665	27.8675	8.51517	4.71169	37.9198	61.7586	YBL042C
chrII	141032	142020		93.139	94.4715	128.701	121.618	51.2179	33.1796	64.0476	33.3971	37.7516	88.6218	31.6694	90.5843	YBL041W
chrII	142112	142910		60.3256	64.039	68.9817	62.0454	45.7829	43.3183	55.9748	41.6937	28.5144	57.5432	37.9203	62.3107	YBL040C
chrII	143085	143726		17.716	18.5811	22.1806	31.7274	15.2475	14.0856	26.3288	13.0988	13.6927	24.0895	13.1526	15.9689	YBL039W-B
chrII	143882	145817	1_RiBi	75.0683	66.1027	4.27814	1.55678	10.8836	59.1916	4.87798	57.9943	4.62946	1.13073	83.7612	86.8716	YBL039C
chrII	146097	146979		55.121	54.4533	60.673	59.6176	36.2733	35.4865	42.504	35.6697	27.106	39.4463	34.3676	49.1364	YBL038W
chrII	147110	150427		14.8655	14.7152	16.6719	15.724	16.5949	16.3592	15.769	19.4009	13.1739	14.5162	14.2811	16.4174	YBL037W
chrII	150299	151268		36.6494	40.0118	29.079	31.3097	32.7785	42.9221	30.5114	40.8814	28.0761	19.3085	40.9673	39.2385	YBL036C
chrII	151409	153702		28.1135	31.1227	24.335	26.9181	15.4143	16.614	20.203	17.9193	11.0448	12.742	18.8685	32.6296	YBL035C
chrII	153847	158450		16.511	17.6733	18.5346	15.732	16.4223	14.394	17.3655	16.1261	10.9474	11.9828	15.6981	18.8964	YBL034C
chrII	158539	159720		55.1907	51.2038	65.9408	67.1912	39.9275	34.2223	70.6654	39.5452	46.2409	72.2001	32.9851	57.1233	YBL033C
chrII	160085	161524		35.2695	33.9215	42.4536	30.2047	30.2824	28.0388	29.7443	30.7372	27.524	28.3503	25.9855	35.8478	YBL032W
chrII	161660	162861		24.6503	26.6062	25.4587	19.0631	18.9661	18.6525	11.227	21.2219	19.9263	20.9809	21.152	28.95	YBL031W
chrII	162739	164144		129.523	142.443	177.757	99.6099	169.293	98.0671	157.127	102.501	127.106	165.493	118.477	149.056	YBL030C
chrII	164346	164890		57.5215	61.7275	96.3339	62.2399	53.0314	32.1865	56.4219	33.1161	99.884	104.375	25.6187	46.7573	YBL029C-A
chrII	166065	167470		28.9492	28.405	24.92	29.0606	38.7201	47.4931	31.6074	48.9561	80.113	19.3166	49.4914	30.822	YBL029W
chrII	167233	167895		67.0781	62.8062	13.7874	9.9035	37.6073	88.7722	19.7563	75.2703	40.978	4.95509	86.9368	69.0611	YBL028C
chrII	168391	169467	2_RPG	374.545	362.297	120.289	55.1547	421.753	548.876	89.9396	508.169	240.896	9.06591	560.326	401.346	YBL027W
chrII	170551	171166		64.7134	66.8465	59.9881	96.3831	63.1146	68.6184	53.9205	59.8114	50.3	32.5709	59.7062	60.8338	YBL026W
chrII	171412	172208		34.2345	34.495	33.1402	35.8378	31.5091	37.1132	34.8193	37.9823	24.6785	17.7224	37.3643	33.4625	YBL025W
chrII	172471	174664		50.7331	50.9668	22.4243	13.1476	31.6827	54.3628	14.0814	52.5636	25.7658	9.13124	60.2035	55.2534	YBL024W
chrII	174707	177578		21.4904	21.2798	20.9362	26.1985	22.2296	21.8015	25.738	21.6758	15.8844	16.1976	22.6601	21.2811	YBL023C
chrII	177796	181407		33.013	33.2885	44.3679	47.8328	22.6241	18.1846	31.2094	20.2068	19.3939	42.938	21.213	40.3518	YBL022C
chrII	181488	182125		47.1573	46.9273	46.2763	42.5821	33.172	37.669	34.1666	31.7319	16.761	22.5551	46.176	44.0394	YBL021C
chrII	182328	184225		22.8935	22.6214	16.5047	16.8415	17.4261	23.5429	14.2093	21.189	9.75836	10.3795	29.0135	24.4632	YBL020W
chrII	184300	185960		17.1501	17.8191	19.9891	29.5856	21.9999	19.4443	22.2917	19.5664	25.981	26.1101	20.8235	16.2307	YBL019W
chrII	185932	186528		41.3879	39.1203	23.0409	31.2695	19.9813	35.5777	14.7196	22.9601	11.1794	17.1963	36.1543	40.5036	YBL018C
chrII	186772	191787		27.5798	27.9804	28.6381	24.0274	30.5701	28.927	37.6557	34.1591	25.4196	29.2613	32.004	31.5327	YBL017C
chrII	192360	193648		35.4875	33.9068	28.5134	26.9127	33.1501	44.202	61.1458	45.8792	28.6052	23.8384	40.1877	31.109	YBL016W
chrII	194018	195976	3_MSN2	14.099	15.851	37.9399	39.1131	45.8101	21.4032	67.5272	26.8936	32.1432	71.0915	23.0776	13.1459	YBL015W
chrII	198952	201776		27.7203	25.9099	18.2492	15.577	15.8969	22.5203	17.9694	21.5486	11.0025	15.9565	28.1316	31.5797	YBL014C
chrII	203436	206020		29.2607	29.3332	39.8409	29.3409	26.0186	19.4372	30.9092	23.1661	30.9712	52.6392	23.1084	33.2731	YBL011W
chrII	205930	206983		30.2223	33.6962	35.8419	36.391	21.3929	16.7981	24.4362	17.4909	18.9505	27.0309	21.1604	31.2438	YBL010C
chrII	207159	209352		27.5618	27.5334	21.621	16.3074	13.4229	15.8431	10.0182	14.8613	7.99207	9.1839	20.9889	32.2463	YBL009W
chrII	209496	212270		14.1091	13.7537	12.3129	13.8561	13.0102	14.4237	12.7609	13.5611	8.94659	8.69398	15.8234	14.99	YBL008W
chrII	212546	216420		35.5693	35.8647	57.7004	59.6398	45.421	28.9681	66.7588	35.8184	52.3398	73.3733	34.1499	39.0042	YBL007C
chrII	216412	217159		87.0236	87.8809	111.459	95.8202	69.6734	60.1007	74.3908	55.4577	54.4277	75.6569	49.1861	71.7268	YBL006C
chrII	217398	220591		36.1189	36.4999	43.5573	34.6429	39.0816	34.0804	21.9492	36.3201	33.058	42.9715	37.2593	35.8008	YBL005W
chrII	227528	235177	1_RiBi	36.5464	33.9452	15.5622	4.95327	21.1379	37.6247	5.75856	34.0967	8.02171	4.89044	47.6063	42.6915	YBL004W
chrII	235219	235855		373.611	388.965	394.678	362.664	430.137	422.399	232.215	345.187	334.575	301.586	390.125	360.497	YBL003C
chrII	236363	237145		368.259	387.595	380.912	378.993	402.851	416.427	178.375	300.038	249.35	253.729	371.694	356.189	YBL002W
chrII	237086	237572		60.9788	62.1597	109.297	122.849	77.7552	48.6023	74.8381	51.4248	99.2873	110.417	52.6869	52.8565	YBL001C
chrII	238763	241446		17.6436	18.2226	29.4839	28.1069	20.1193	13.2568	31.0215	17.6411	40.5278	67.1808	16.3541	18.7291	YBR001C
chrII	241592	242601		84.9142	81.2518	62.759	38.3352	32.7286	51.5935	28.2985	47.8676	37.6014	65.1012	54.9463	77.8781	YBR002C
chrII	242774	244351		22.5652	22.9093	32.8105	34.1554	23.2045	15.1019	29.6044	19.4178	29.8938	48.4367	15.8098	21.5008	YBR003W
chrII	244272	245682		25.3957	27.527	15.6855	26.8988	34.968	42.4942	47.4974	36.6449	23.387	17.2617	36.1997	27.3769	YBR004C
chrII	245816	246693		32.0531	29.3011	30.4417	58.1581	67.3174	64.1438	149.411	55.5857	44.593	31.4124	41.9485	27.6575	YBR005W
chrII	246878	248646		20.7557	21.3632	31.7037	73.6579	25.8654	19.5428	48.4992	21.7504	29.125	41.8359	20.5267	19.869	YBR006W
chrII	248676	251161		25.7	26.9486	32.0979	47.1792	31.129	26.3955	41.0987	27.4248	19.8759	32.5042	26.078	28.0057	YBR007C
chrII	255207	255781		515.642	556.421	581.347	479.806	624.347	559.622	342.762	468.699	527.42	559.976	549.466	479.911	YBR009C
chrII	256302	256903		529.242	539.167	560.369	459.262	620.303	546.532	420.519	471.149	544.108	542.111	550.225	464.672	YBR010W
chrII	256998	258041		129.688	127.654	118.025	103.137	80.0707	89.2264	75.2536	89.5814	65.7675	80.7852	103.044	125.392	YBR011C
chrII	265157	266235		0.206289	0.109295	0.109638	0.166289	0.0649536	0.134657	0.167078	0.0527829	0.20975	0.148145	0.0952876	0.117226	YBR013C
chrII	266617	267418		27.8362	30.4442	28.5911	24.0507	20.964	22.5552	16.4894	22.191	22.2162	25.9759	24.6388	28.4547	YBR014C
chrII	267575	269595		40.0726	39.0976	32.1038	24.2788	25.6506	33.0637	25.0299	37.4352	30.6048	31.1643	38.7806	41.578	YBR015C
chrII	270209	270841		56.7505	58.7094	88.6658	91.9672	103.442	70.4226	185.749	62.172	103.933	115.367	60.246	55.3147	YBR016W
chrII	270843	273769		30.7958	30.3089	18.776	13.0708	22.7431	34.0915	17.2004	38.0578	27.7734	18.657	38.7053	33.3159	YBR017C
chrII	281306	283509	1_RiBi	38.4925	37.0482	13.3298	8.73028	18.9653	31.8803	12.257	38.0532	28.431	9.36172	32.6467	38.2972	YBR021W
chrII	283660	284421		34.8421	38.468	42.3486	56.5429	37.3111	33.4606	39.1625	31.9218	34.1286	39.627	28.3	31.8618	YBR022W
chrII	284277	288068		35.358	37.6711	32.8107	44.3297	52.5041	56.5962	69.2351	61.7628	24.6321	18.8353	46.6992	40.8195	YBR023C
chrII	289327	290567		31.7737	31.1895	25.7682	25.9032	27.6115	30.9855	26.4434	30.3333	39.3476	30.4595	29.9775	26.2677	YBR024W
chrII	290475	292038		154.639	155.203	62.2896	12.6835	72.1197	141.067	12.8734	126.716	191.255	159.319	135.35	143.099	YBR025C
chrII	292760	294086		18.8264	19.8104	36.9534	41.1925	41.1137	24.6494	38.9356	28.7424	69.7347	62.0566	22.0591	17.2187	YBR026C
chrII	294280	296101		22.8599	25.1303	21.3651	21.8354	19.8484	23.0134	14.5158	25.9703	27.9212	20.3719	23.0579	26.4327	YBR028C
chrII	296295	297821		51.9119	50.0233	32.3175	32.7042	22.8821	31.7569	12.9813	32.6365	35.8168	25.0533	33.2862	56.0675	YBR029C
chrII	298208	300063		47.333	45.2066	19.13	13.6696	20.8516	42.9429	8.57564	38.2327	21.0237	9.77761	37.5639	42.9319	YBR030W
chrII	300141	301349	2_RPG	367.41	338.472	100.62	29.346	169.393	381.418	43.5359	382.164	164.276	25.2655	399.659	364.614	YBR031W
chrII	301887	304762		11.5474	11.2824	8.40544	15.9476	11.5576	13.9204	17.7309	17.9926	15.3802	11.6654	14.263	11.8096	YBR033W
chrII	304750	306045		85.934	74.318	14.6129	15.6233	31.6949	102.205	29.1911	90.9345	26.3105	7.22868	103.091	89.2565	YBR034C
chrII	306117	306989		70.9938	74.4378	67.8361	94.8696	67.9944	71.5271	80.7386	64.9646	67.5144	66.927	55.673	62.9122	YBR035C
chrII	308758	310388		51.5843	49.7137	59.547	61.95	47.4323	42.3245	62.0083	42.9701	39.9596	53.6299	42.4311	47.2361	YBR036C
chrII	310496	311500		32.1266	31.2537	48.5544	41.9031	33.3616	24.1136	46.2941	23.0828	38.4601	42.5788	23.0078	29.3296	YBR037C
chrII	311846	314976		35.4865	33.1981	47.3888	32.029	25.4726	18.7009	8.66995	20.6084	10.8679	29.8627	30.3225	34.859	YBR038W
chrII	315483	316690		56.4834	64.8465	70.2665	56.8745	38.1163	33.55	39.017	33.0115	28.4299	70.4402	39.4412	62.6478	YBR039W
chrII	318185	320434		16.3793	17.1381	22.6594	27.0205	20.3159	14.8242	24.2612	17.6794	30.5002	28.0194	14.3727	17.613	YBR041W
chrII	320375	321671		25.1588	25.325	24.9774	30.6148	21.6957	20.5647	22.0063	20.3457	19.6699	20.6769	22.5727	27.5867	YBR042C
chrII	321757	324093		29.2472	27.1789	36.8007	76.2642	19.6873	18.9447	27.7638	19.1507	11.6033	16.3946	22.5485	31.0542	YBR043C
chrII	324264	326141		24.5394	24.9227	35.1251	59.4204	26.8938	21.7702	38.1547	25.1001	21.3928	21.976	20.3174	25.4037	YBR044C
chrII	330467	331583		11.5593	12.093	28.5318	54.3553	27.0583	16.1665	47.16	18.0083	33.5607	46.0372	12.8761	11.1089	YBR046C
chrII	331823	332426		13.8591	13.5785	17.5541	63.89	23.8561	19.9379	39.6171	21.2152	16.2558	12.6096	13.9251	8.39768	YBR047W
chrII	332751	334022	2_RPG	288.044	283.66	87.3186	30.161	287.234	407.019	47.2185	350.88	170.175	10.3414	421.27	293.164	YBR048W
chrII	333993	336966		40.8808	40.5372	42.8286	31.6817	32.2265	30.4279	24.5568	32.7189	28.6497	47.9804	35.8094	48.6125	YBR049C
chrII	338661	339422		35.5715	41.2811	129.836	94.9112	55.298	17.5095	86.8614	25.929	107.892	187.046	15.1379	30.6378	YBR052C
chrII	339554	340774		18.8587	20.7545	54.0276	60.86	33.6456	14.3728	54.343	20.0109	76.2825	106.796	12.7544	14.9981	YBR053C
chrII	342648	344498		24.3028	25.2425	47.5518	19.3343	22.2937	17.6833	28.4056	16.3584	191.251	221.933	16.6426	18.8586	YBR054W
chrII	344476	347321		20.046	20.0469	15.114	12.0802	17.5819	23.6853	11.3836	22.2942	17.1404	15.3611	23.1327	21.1807	YBR055C
chrII	347808	349422		13.5672	15.7098	41.5279	46.9947	36.2547	14.0054	57.5069	19.0623	63.175	77.9144	10.8523	11.6869	YBR056W
chrII	352070	353402		40.9587	40.0525	36.6338	32.0239	36.3863	40.336	30.7163	42.3764	30.1641	25.564	41.2123	42.9088	YBR057C
chrII	353549	356038		20.6249	19.9688	18.1125	17.637	21.6657	23.6756	21.4356	25.6318	18.6871	12.4015	25.9098	21.2351	YBR058C
chrII	356151	356644		44.6382	50.1308	50.3924	49.4561	51.0615	43.275	31.6112	35.254	53.7865	41.1371	35.4751	40.8696	YBR058C-A
chrII	356798	360336		25.8876	27.1548	46.7625	45.2282	34.8723	18.8758	41.2379	23.6779	43.5574	55.9852	19.4214	26.5701	YBR059C
chrII	360587	362631		27.3281	27.2661	21.2337	19.268	19.9563	24.99	17.7036	24.8269	33.3421	31.4152	24.8473	27.955	YBR060C
chrII	364656	365760	1_RiBi	36.7507	37.0661	15.8363	14.4801	17.738	38.0473	12.4438	33.1682	14.6545	6.27069	39.1962	39.2895	YBR061C
chrII	365870	366600		40.6616	38.8838	39.8114	41.0065	29.8121	30.9158	24.1	27.8021	26.5664	28.2297	30.4198	35.2132	YBR062C
chrII	369940	370972		50.2539	50.6709	94.8425	64.8703	98.6454	63.9472	85.9342	60.0564	67.1119	65.8257	46.6277	41.8105	YBR066C
chrII	371982	372934		109.905	108.493	135.62	80.4939	226.576	179.698	206.716	154.066	811.196	398.153	177.182	74.5324	YBR067C
chrII	373640	375751		223.547	222.013	267.934	43.7463	137.414	167.544	63.1265	127.894	164.765	169.567	210.778	225.846	YBR068C
chrII	376406	378537		119.024	112.988	132.929	18.9256	39.0226	47.1702	13.5581	34.0561	21.1647	20.2014	60.6592	115.234	YBR069C
chrII	379159	379986		43.389	48.6915	58.0173	40.3302	22.2759	19.5783	16.2814	15.7743	35.1871	55.8537	20.8517	41.804	YBR070C
chrII	380327	381564		104.615	119.2	130.011	155.71	52.7624	40.298	99.7613	38.5106	389.349	619.989	42.0764	96.0951	YBR071W
chrII	381955	382841		15.0824	16.1865	17.4398	30.8946	20.7333	17.064	49.2128	17.414	1118.74	1237.01	14.4361	13.2554	YBR072W
chrII	383139	386052		27.2346	30.044	22.8142	29.0153	26.0878	27.2707	35.3456	30.795	22.6273	8.7736	27.2712	31.7764	YBR073W
chrII	386280	389333		18.4434	17.84	12.9999	16.8814	20.7765	25.7632	20.4776	28.1328	23.9053	10.6752	26.838	21.9498	YBR074W
chrII	391586	392415		67.9882	73.8956	108.712	167.231	113.889	84.7524	164.695	78.351	74.4148	82.3956	47.9841	57.2011	YBR077C
chrII	392946	395237		199.623	203.467	167.469	179.089	137.658	167.329	132.125	156.625	103.183	86.3273	166.343	220.516	YBR078W
chrII	395294	398301		86.5547	83.6132	39.1549	21.7609	60.1773	106.989	23.9543	112.133	44.4188	15.8512	130.407	103.641	YBR079C
chrII	398439	400931		23.204	23.0064	27.443	34.7608	28.0879	21.7187	38.9148	24.9504	21.3588	28.1215	25.0547	25.6868	YBR080C
chrII	401138	405396		18.3242	18.6069	18.5888	20.2636	19.2385	18.3725	16.3545	19.3952	15.4794	19.7865	23.258	22.3154	YBR081C
chrII	406459	407287		115.32	118.03	137.466	72.7951	45.8755	49.5027	44.978	44.9527	346.564	462.027	51.7953	122.162	YBR082C
chrII	409121	410712		58.2067	58.4089	68.071	44.3326	62.9389	49.468	58.0897	60.6049	51.7779	28.3012	56.3829	56.3753	YBR083W
chrII	410970	414143		43.5538	41.1061	9.80844	4.04107	22.2944	49.3541	7.53881	48.8065	14.5641	2.80927	63.6161	51.3935	YBR084W
chrII	414062	415492	2_RPG	324.025	311.468	98.3677	36.134	318.773	425.962	60.2792	380.72	184.561	8.66652	425.98	320.311	YBR084C-A
chrII	415878	417089		7.94882	8.46438	5.78649	6.94275	22.8364	27.5055	16.525	31.5455	33.5679	6.90249	25.4237	7.6312	YBR085W
chrII	418708	419263		49.9974	53.3584	193.462	265.068	186.988	78.0538	420.611	102.55	721.487	838.619	55.2692	40.4258	YBR085C-A
chrII	420077	423357		41.5229	40.7487	47.6532	44.8956	33.6758	30.1943	30.2416	36.667	85.703	108.098	38.3295	46.19	YBR086C
chrII	423734	424881		38.8522	38.0465	30.8597	25.2447	25.2631	31.3788	14.0872	29.7376	29.8633	22.4125	35.8394	39.6408	YBR087W
chrII	424933	425827		78.887	94.3643	75.5049	81.2602	59.9335	63.3965	77.1439	55.9424	72.0927	39.9991	56.3509	75.8233	YBR088C
chrII	426013	426911		61.4976	67.3476	92.2169	85.2981	54.4444	30.2558	68.6127	35.0693	63.5328	118.126	28.77	59.7478	YBR089C-A
chrII	427064	427524		51.9527	51.1118	49.0705	41.979	43.9706	47.8038	57.7627	43.6176	35.9122	46.8467	35.4681	47.498	YBR091C
chrII	427652	429129		73.0299	62.6795	52.0876	24.2865	51.3342	67.2408	18.2488	52.0182	30.474	12.7513	84.5511	49.7095	YBR092C
chrII	429490	430995		48.7181	41.871	54.189	37.1676	65.2479	60.5075	22.5195	49.2021	36.5006	20.5609	67.3939	36.6266	YBR093C
chrII	431969	434388		14.0761	14.5225	11.2818	10.7723	11.9973	15.0691	10.0769	14.8257	11.2615	11.0715	16.3937	15.1797	YBR094W
chrII	434393	435737		29.7139	30.3337	26.7515	30.9309	26.2005	30.3367	25.0196	28.6737	15.7291	22.0426	31.774	30.824	YBR095C
chrII	435929	436792		30.8764	32.757	47.8996	62.5316	39.6568	31.0798	43.0745	28.84	33.4375	40.0615	27.2506	29.4309	YBR096W
chrII	436919	441484		10.6282	10.3529	12.2324	12.7658	14.0826	11.8277	14.0271	13.9088	17.0713	12.5328	11.1513	11.4038	YBR097W
chrII	441491	443805		16.1942	16.1569	17.7756	15.7644	16.5472	16.154	14.9132	18.0233	63.4549	62.0984	15.7064	19.4092	YBR098W
chrII	443779	444764	4_HSF1	102.883	106.931	104.037	44.9469	30.044	38.9299	31.2633	37.2286	952.746	1144.66	42.1962	110.334	YBR101C
chrII	444714	447400		26.5233	29.1843	29.3908	24.2721	29.9264	26.9756	35.7997	27.7743	181.145	273.298	23.4721	25.315	YBR102C
chrII	447542	449365		27.8435	27.258	26.7808	27.6329	31.7414	31.663	33.1615	33.4408	21.32	17.8698	27.9793	27.6456	YBR103W
chrII	449546	450790		35.1912	33.4754	19.6233	43.0085	34.3791	50.7389	46.1047	41.9862	12.9623	4.87691	52.4092	40.2341	YBR104W
chrII	450763	452037		23.9899	24.004	42.9594	68.6596	27.8154	17.4064	89.6106	22.3703	39.8472	42.6071	17.8197	20.5402	YBR105C
chrII	452618	453365		164.808	162.409	138.408	139.578	69.6203	95.533	65.1794	79.4884	48.0853	86.2856	104.61	174.729	YBR106W
chrII	453251	454584		40.5843	40.717	51.4459	63.74	34.2354	31.7813	40.7409	28.5696	21.0872	34.6635	30.1477	40.9964	YBR107C
chrII	454806	457809		13.6447	12.759	22.4864	30.8137	18.9762	11.7029	40.9197	15.7223	22.7654	30.5208	12.1821	13.8388	YBR108W
chrII	457723	458447		73.2815	70.5513	77.6467	113.098	71.3742	62.4619	106.727	58.8531	48.6407	63.3185	57.5073	65.1191	YBR109C
chrII	458656	460331		21.6161	22.3633	24.4689	34.8017	33.3645	28.7785	42.7344	29.5906	21.0795	17.3762	26.2027	21.5746	YBR110W
chrII	461102	461873		32.1469	34.9813	65.9383	59.0741	44.7073	22.7272	48.3613	27.0403	59.1035	78.3485	21.8176	27.3289	YBR111C
chrII	462097	462743		29.5018	30.6648	37.3418	34.4706	28.1066	26.8508	15.9669	26.3486	38.4354	39.5133	27.5419	30.2727	YBR111W-A
chrII	462698	465971		57.5116	57.2036	70.4293	60.2275	65.9883	60.4456	54.8546	70.1832	71.3705	82.1292	72.9177	67.0205	YBR112C
chrII	467145	469710		14.3889	14.9262	17.4735	21.709	16.8826	16.4531	23.7944	19.0447	30.6165	40.7285	18.6612	15.4225	YBR114W
chrII	469697	474042		28.186	27.7861	26.443	53.1544	34.9236	39.3804	30.7726	41.7521	20.7829	16.0135	46.5698	36.6389	YBR115C
chrII	474262	476477	3_MSN2	19.9663	18.92	18.0539	18.1256	21.1613	22.1513	24.6648	20.3623	42.1217	37.9287	19.6509	17.4029	YBR117C
chrII	477648	479138		609.641	605.455	384.982	212.689	583.178	568.284	424.772	966.399	614.64	451.736	643.875	627.422	YBR118W
chrII	479228	480469		28.643	30.0606	38.2193	33.5195	33.8438	30.0479	26.1165	34.7522	34.0751	33.1129	30.8617	29.1265	YBR119W
chrII	480368	480992		31.3567	33.2723	46.6116	57.7093	36.1611	23.5631	32.7061	25.2144	39.9195	46.6764	25.9251	30.4475	YBR120C
chrII	481260	483459	1_RiBi	66.4212	63.1066	35.2209	28.9628	41.795	66.08	25.1274	63.8494	27.8329	15.2181	78.8161	77.7412	YBR121C
chrII	483772	484551		75.7637	72.342	70.5321	66.8211	54.1278	52.9734	61.1739	45.6727	37.3782	43.0588	51.1776	64.7849	YBR122C
chrII	484683	486758		22.2487	22.432	22.5147	24.6193	18.8704	16.1949	19.7447	16.2585	12.6299	19.1779	18.3339	23.2891	YBR123C
chrII	486959	488567		21.3401	20.2292	21.3833	16.9384	13.0049	13.65	9.92834	13.2177	11.2298	16.9304	15.0657	21.563	YBR125C
chrII	488773	490498		40.9613	45.7493	233.638	142.882	172.651	29.9267	148.232	58.8427	416.239	541.811	28.5294	32.7069	YBR126C
chrII	491101	492889		52.43	52.6148	70.5656	77.9195	69.7091	55.5871	74.1177	67.8479	76.7874	81.0587	65.2718	57.4972	YBR127C
chrII	492958	494119		30.6414	29.5044	38.2244	56.6123	32.0961	26.1122	41.3327	24.5119	32.2117	31.6782	22.1565	24.1041	YBR128C
chrII	494262	495387		23.1663	22.0739	24.9933	27.7152	22.8772	18.5013	26.0038	18.8092	19.6829	19.786	21.3855	24.0128	YBR129C
chrII	495478	496937		40.929	41.4713	44.2329	38.5582	33.0722	29.8044	29.2589	27.9039	23.5206	34.7958	32.0711	44.0936	YBR130C
chrII	497118	499359		13.3888	14.0389	13.5883	15.9387	19.3801	18.1753	20.5353	17.9304	14.6017	13.0201	20.4433	15.3184	YBR131W
chrII	499347	501593		8.10412	10.0165	27.2239	36.2663	20.997	14.2584	39.0521	18.5258	30.9248	46.4404	14.3241	9.62568	YBR132C
chrII	501682	504434		18.5816	18.1774	20.6607	20.1739	20.5098	18.2222	28.5802	21.2073	15.2498	13.786	17.3265	19.0288	YBR133C
chrII	504744	505516		40.5894	41.1156	38.999	36.7231	30.1254	32.4472	32.8817	30.1128	20.6251	29.282	25.7318	37.9537	YBR135W
chrII	505633	512906		9.0536	8.59732	9.69202	10.0858	14.3728	14.1119	13.7201	15.0272	12.3394	8.80504	13.5375	9.77616	YBR136W
chrII	512907	513720		27.2779	29.0635	57.2672	65.4412	48.2705	27.1383	53.3512	26.3254	44.3623	55.0413	22.9791	26.5124	YBR137W
chrII	513611	515408		16.4466	14.5115	27.8444	32.5862	20.4043	12.3823	18.7212	12.8733	15.74	20.133	15.1973	16.3465	YBR138C
chrII	515652	517361		19.5406	19.7706	108.137	125.024	78.3902	12.0889	93.6249	19.7378	77.774	109.344	11.9981	17.0831	YBR139W
chrII	517248	526917		15.7516	16.3486	17.4365	16.2814	18.0031	16.8947	20.1906	21.5124	20.2609	21.5713	16.7379	19.0841	YBR140C
chrII	526942	528070		36.0972	36.7179	22.3959	18.3845	17.427	30.0255	13.1774	25.7133	11.8554	13.3091	31.4223	36.7488	YBR141C
chrII	528240	530816		27.4909	25.4447	4.31527	3.7597	10.9881	29.5098	7.50668	26.7814	9.27632	2.44472	35.2873	32.5143	YBR142W
chrII	530730	532270		96.9335	91.8932	44.2776	30.2012	47.7827	94.9079	31.9287	89.1479	56.4705	23.9265	97.3128	96.8682	YBR143C
chrII	533705	534927		15.9168	16.3892	20.8871	101.917	25.679	22.5959	45.2085	24.1735	20.4264	25.1551	18.4871	17.2183	YBR145W
chrII	535170	536300		37.8113	39.2684	44.0839	51.1955	46.8861	42.5714	44.3693	42.5733	33.48	44.0893	40.4475	40.7716	YBR146W
chrII	539910	541124		30.1995	33.4548	89.5293	91.8185	74.2811	28.5256	106.404	39.2494	120.537	136.61	22.9438	30.1767	YBR149W
chrII	541199	544523		18.9689	19.7332	25.6503	33.0161	32.2595	24.607	51.5437	27.3691	23.6226	28.2127	24.3349	23.3394	YBR150C
chrII	544865	546112		63.4615	62.6016	104.374	95.8516	112.408	67.2241	99.9378	71.1158	82.2933	100.674	71.4982	65.121	YBR151W
chrII	548264	549131	1_RiBi	96.9996	90.9161	34.14	19.9537	41.3618	98.0348	21.604	78.708	56.7842	21.0364	95.3458	96.0299	YBR154C
chrII	549673	551020		30.9961	27.9162	7.72119	6.98879	9.40687	24.3751	10.2996	23.2723	5.68305	5.66119	30.1803	33.1248	YBR155W
chrII	550924	553254		15.6084	16.6814	16.0103	19.8599	22.3298	20.4782	42.1753	23.7588	14.4238	11.5029	18.8069	20.186	YBR156C
chrII	556285	558348		127.835	143.032	115.851	119.152	118.74	129.734	47.0225	100.382	49.8452	38.6845	149.426	129.96	YBR158W
chrII	558620	559816		35.7955	34.3663	40.0633	43.4202	42.7625	37.8258	50.1248	36.2991	36.632	35.2134	34.2476	35.0747	YBR159W
chrII	559999	561070		38.6048	40.6646	40.0819	46.5621	39.0388	44.0205	43.6117	45.1398	48.8663	51.9579	42.5702	39.5372	YBR160W
chrII	561406	563080		21.5357	22.1553	29.3612	25.4155	21.6488	17.7038	27.0742	22.8461	48.0814	43.0173	18.0634	24.1075	YBR161W
chrII	562925	564807		96.31	96.5862	72.1204	87.5827	91.3722	99.3328	135.963	103.095	44.1675	39.6003	102.665	113.393	YBR162C
chrII	565167	565517		138.731	130.009	113.543	119.477	103.388	113.938	147.848	87.7611	49.0726	51.6006	81.3405	113.71	YBR162W-A
chrII	565607	567793		22.314	23.0092	23.3224	37.0637	27.8871	26.0495	41.1323	25.7163	20.1795	14.9364	23.567	23.5325	YBR163W
chrII	567753	568566		43.674	41.7601	41.7772	41.5138	40.4739	40.0467	36.4797	35.5128	30.1767	29.6183	37.635	39.8841	YBR164C
chrII	568759	569731		30.7531	29.3561	31.842	33.9154	31.6645	34.4059	32.5732	31.2564	25.6848	25.6922	28.2307	30.9987	YBR165W
chrII	569728	571242		23.1678	22.595	19.3133	32.8111	26.4099	32.2976	26.9348	34.3866	18.2407	14.3454	30.872	27.9166	YBR166C
chrII	571400	572139		46.0055	43.6776	40.3486	56.2474	46.7199	57.5047	39.1325	50.0128	31.3991	25.9721	41.0691	42.2102	YBR167C
chrII	572054	573810		14.301	14.0164	16.3164	22.6468	19.3077	18.4875	19.9735	20.0801	31.0295	29.6329	17.035	14.5761	YBR168W
chrII	573744	576029		11.4995	12.1704	18.9157	33.9005	24.4493	19.066	70.9835	23.2335	279.97	300.82	13.8133	9.73968	YBR169C
chrII	576209	578135		26.7599	26.6867	36.4038	38.5017	21.473	16.7826	28.0979	18.3538	60.9209	92.9025	15.7687	29.3112	YBR170C
chrII	578314	579139		45.401	46.8623	34.9446	31.2602	26.2045	34.5658	16.3796	30.7401	21.7247	27.6333	36.4954	50.6761	YBR171W
chrII	579048	581490		63.4654	60.5469	23.7594	15.7413	42.7896	79.6974	26.1086	84.5143	42.0531	10.6107	92.9726	75.8329	YBR172C
chrII	581659	582214		90.3744	85.4203	73.1878	74.3089	52.8423	67.7314	57.5673	57.9971	49.8124	48.1908	59.4969	90.586	YBR173C
chrII	582384	583467		33.3406	31.2662	32.7294	31.8379	31.2861	34.2541	34.8771	34.5007	24.4555	19.6547	31.9425	35.062	YBR175W
chrII	583601	584804		18.1311	17.3866	17.1232	18.0976	17.8229	19.0157	19.7551	21.4378	27.2552	22.4771	19.5861	19.9394	YBR176W
chrII	584645	586234		26.8018	29.475	54.7507	77.302	63.2244	33.9452	88.7812	41.3791	110.34	78.0723	35.0872	33.153	YBR177C
chrII	586490	589178		17.6633	16.2226	17.7615	18.9688	23.518	20.4937	24.3494	23.6863	20.9553	18.3481	22.3254	19.9275	YBR179C
chrII	591608	592838	2_RPG	317.645	303.784	95.5595	32.3717	316.406	409.685	56.2211	361.212	175.26	9.00819	451.648	344.555	YBR181C
chrII	593230	595017		11.8746	11.6243	9.79578	16.5586	50.4621	53.0324	103.294	48.5236	25.1613	8.76736	38.0988	12.2576	YBR182C
chrII	595982	597172		13.8852	13.8205	40.8654	41.6882	102.982	54.5105	105.288	64.8177	160.315	102.43	37.4548	11.0288	YBR183W
chrII	597289	598975		7.43066	8.64816	8.72956	10.6503	12.0857	14.9141	8.63959	12.1254	14.9664	5.70306	11.4079	7.19374	YBR184W
chrII	599080	600010		22.8771	25.9417	30.0458	33.2128	29.8631	29.2689	24.3833	25.5137	26.8301	27.4599	27.6365	24.7527	YBR185C
chrII	602499	603637		60.4596	54.282	38.248	33.4367	48.0475	67.4008	28.896	64.8734	35.9652	21.3327	80.9331	64.4944	YBR187W
chrII	603610	604205		35.7529	34.5842	28.6274	29.316	39.4523	40.9703	32.5546	37.104	24.8011	14.8896	29.7227	28.1905	YBR188C
chrII	604453	605579	2_RPG	406.307	395.458	98.7086	23.3924	466.734	657.8	47.4521	534.202	311.049	4.52733	675.084	428.816	YBR189W
chrII	606247	607270	2_RPG	333.664	312.95	85.9641	21.8671	325.725	448.396	44.7883	384.314	209.873	5.35918	454.937	347.892	YBR191W
chrII	607488	609057		27.5381	26.9982	20.2856	14.8389	31.2418	34.196	16.4377	35.0876	29.0044	13.0936	34.8707	29.125	YBR192W
chrII	608620	609812		31.8668	32.4716	33.614	29.8184	32.4068	32.7826	24.9847	32.1393	36.7744	30.7798	32.8787	31.8667	YBR193C
chrII	609896	610620		30.5347	29.6208	33.0754	36.3359	33.7044	29.0017	27.3444	29.1075	32.6933	33.6661	29.168	26.3217	YBR194W
chrII	610488	611927		25.258	26.0922	19.9093	22.5984	22.78	26.1666	23.2079	27.2792	19.9497	14.5419	28.0958	25.8797	YBR195C
chrII	612070	614007		194.758	183.986	151.623	201.997	207.314	256.167	349.124	251.287	141.754	237.469	240.025	208.239	YBR196C
chrII	614793	615890		92.0106	84.8887	84.5731	70.2525	66.5841	82.3139	90.4813	68.2914	44.9966	78.7823	62.7124	76.8475	YBR197C
chrII	616053	618600		36.0237	34.1186	31.1366	24.9417	32.3544	33.6409	29.0872	39.9501	24.4822	26.6287	39.3792	41.4819	YBR198C
chrII	618809	620433		36.4844	35.7134	62.8404	64.184	54.1609	30.1645	59.3537	36.1423	52.2399	73.4175	32.3115	36.1993	YBR199W
chrII	620808	622784		16.0796	16.2317	18.3848	20.95	18.9138	16.4686	21.783	18.094	12.6466	15.5304	18.0687	17.4208	YBR200W
chrII	623425	624337		16.232	16.4964	22.8559	29.3763	21.366	15.3037	22.3744	16.2486	18.3396	27.1726	14.3694	18.1015	YBR201W
chrII	624299	624739		6.8617	5.66852	10.5604	15.0469	29.1227	18.6801	48.5007	18.3511	22.8291	11.6058	13.7244	5.28709	YBR201C-A
chrII	625706	628459		35.1429	32.7024	31.1264	32.6661	34.2667	37.6532	30.9245	36.3071	15.6705	11.9748	46.8459	34.5153	YBR202W
chrII	628972	631961		11.0075	11.2965	17.9754	22.3875	18.6648	12.8028	43.1619	18.1245	34.8968	21.7901	13.4964	11.055	YBR203W
chrII	631997	633448		11.6371	12.4343	21.3368	29.1331	15.7412	9.73145	22.5791	12.0275	23.3113	30.5377	10.8057	11.1371	YBR204C
chrII	633574	635016		31.845	30.65	29.7271	28.1144	19.8556	22.2771	20.5788	20.6716	16.1693	25.1824	21.89	30.9912	YBR205W
chrII	635056	636662		34.7253	35.531	40.2901	52.304	32.8142	26.028	70.74	25.819	21.5855	32.1316	29.6963	36.5925	YBR207W
chrII	636576	642305		15.7873	15.9311	194.815	120.708	169.843	18.4572	428.468	20.4977	9.88082	10.8338	19.9508	15.0694	YBR208C
chrII	645327	646194		23.0114	21.8571	23.2779	37.6499	28.4038	25.1472	29.4173	22.1312	14.1006	12.8725	21.1132	19.9652	YBR210W
chrII	646045	647244		21.2248	22.1651	30.3176	32.0753	35.6747	28.8894	34.8176	28.7709	29.9306	26.7669	26.3645	22.3651	YBR211C
chrII	647437	650112		17.3187	19.0146	32.3911	29.0625	28.465	18.1396	38.2127	22.9539	24.192	32.0556	17.0583	19.7997	YBR212W
chrII	651335	653190		18.7667	21.3954	68.9199	70.8752	51.8793	12.9221	93.9766	21.5789	167.899	171.578	12.2614	16.5188	YBR214W
chrII	653314	655435		22.5768	21.4563	20.7555	22.5191	24.4654	25.3044	22.0847	26.0291	14.6932	13.7059	25.7707	24.8627	YBR215W
chrII	655302	657632		17.2467	16.9672	19.2184	20.5229	23.7631	21.4713	20.0608	23.7736	29.4624	23.3581	20.9662	19.9038	YBR216C
chrII	657767	658614		23.1845	22.7843	25.2013	26.5106	25.0403	26.6268	18.8479	25.1087	25.2654	20.21	21.4095	23.9381	YBR217W
chrII	658593	662391		28.2452	29.1512	48.1641	74.8367	76.2823	41.2578	133.69	68.5106	71.8336	35.4769	42.2021	36.1128	YBR218C
chrII	662868	664758		17.4713	17.0553	14.7882	15.0482	16.4938	18.0875	23.4078	21.7055	14.7704	12.5156	17.5315	19.6209	YBR220C
chrII	664912	666486		41.2311	38.6895	61.3639	73.9837	59.7933	41.396	104.585	49.1914	42.021	50.4739	34.9167	40.6578	YBR221C
chrII	666604	668392		18.7338	18.7113	27.0242	61.0604	44.8794	36.0948	145.606	44.9393	39.6036	27.4204	23.1761	20.9539	YBR222C
chrII	668402	670325		14.6017	15.1481	21.8232	28.7065	19.9965	14.8612	38.3826	17.4646	18.2878	23.3308	11.6804	14.1343	YBR223C
chrII	670473	673479		13.1807	13.9319	19.62	20.8557	19.1445	13.2451	25.6083	16.2968	13.4926	21.0869	11.8295	14.725	YBR225W
chrII	673462	675191		19.3404	18.0215	20.3807	36.0433	21.7764	18.6034	24.8587	20.1383	16.5917	16.7223	21.5852	21.0683	YBR227C
chrII	675312	676341		24.7079	24.1664	28.5842	51.3948	32.9309	27.7537	38.7854	27.6224	22.8596	24.112	25.091	27.0749	YBR228W
chrII	676225	679247		13.4338	13.9665	19.6985	21.1289	16.3228	12.017	21.4674	15.6835	13.6254	21.6638	12.6422	15.728	YBR229C
chrII	679384	680106		31.3697	36.8233	133.292	82.9185	50.6817	16.7052	70.51	24.7324	116.157	232.937	15.886	28.5818	YBR230C
chrII	680283	680696		103.908	101.762	109.329	72.2918	68.3162	82.3814	54.4943	88.5816	116.552	126.262	90.3001	109.641	YBR230W-A
chrII	682138	683146		41.3913	39.3449	38.033	47.6247	26.7592	26.2832	35.4883	28.5085	13.8666	26.6738	25.0107	39.6181	YBR231C
chrII	683348	684830		19.0006	19.5894	22.8201	31.3334	20.5883	16.7526	28.1934	16.9607	10.7006	15.3812	16.0113	19.7101	YBR233W
chrII	684933	685497		23.2673	21.1229	24.3878	23.0031	21.4239	22.8786	20.2067	22.5945	16.7322	16.5025	18.8809	23.5806	YBR233W-A
chrII	685396	686637		32.4045	30.2446	64.8601	70.9283	43.7153	20.6728	75.1833	24.6234	36.2855	49.7861	21.2972	31.3004	YBR234C
chrII	686819	690355		12.392	12.7367	20.4543	37.2531	18.4236	10.6788	39.4266	14.0155	10.8782	14.695	11.9765	13.2295	YBR235W
chrII	690241	691742		26.5475	28.2925	27.3221	30.7371	28.5168	26.5397	35.1537	27.2315	17.7158	23.3961	27.8665	29.9144	YBR236C
chrII	691912	694682		14.4671	14.8957	15.4524	17.6166	18.2343	16.5149	22.8792	18.7355	11.4966	16.2006	17.4577	16.8581	YBR237W
chrII	694605	697374		25.5322	25.4378	8.53596	4.74566	14.0605	28.6023	10.2062	25.3679	25.5812	4.48156	34.4815	30.7634	YBR238C
chrII	698289	700091		26.9919	26.094	18.232	22.0923	26.9659	39.0569	28.7076	39.314	31.7073	18.412	36.4112	30.5384	YBR239C
chrII	700483	702033		7.14452	7.6713	7.65367	16.4066	19.0826	18.2369	26.7784	18.1191	21.3573	6.96297	14.9693	6.5292	YBR240C
chrII	702534	704083		6.73899	6.69385	10.7829	29.7043	13.939	8.94281	45.9497	12.5325	18.134	19.2538	8.56622	6.8812	YBR241C
chrII	704501	705454		44.7303	41.0298	22.3017	29.936	40.8638	75.8871	43.0036	59.9326	26.2882	13.467	73.5261	49.2939	YBR242W
chrII	705238	706849		18.9453	18.6668	18.9519	17.3148	13.6535	15.3599	13.9425	16.6355	10.2923	15.13	18.1201	21.2984	YBR243C
chrII	707347	708138		26.7063	26.0063	25.6962	57.5101	29.8697	26.9021	35.0491	20.949	20.6908	16.2201	26.0252	23.8123	YBR244W
chrII	708040	711539		26.4324	26.6149	21.4464	23.0566	16.7428	21.0152	18.0852	21.1796	12.8272	17.6337	26.2082	31.5104	YBR245C
chrII	711518	712883		30.8139	31.4808	22.9658	26.2183	19.2133	25.6406	23.6449	24.9182	21.3611	17.8257	24.8852	32.5765	YBR246W
chrII	712885	714536	1_RiBi	46.8904	42.348	6.04759	2.78812	11.1378	43.7382	5.08462	38.461	7.31423	2.15047	55.0089	53.1834	YBR247C
chrII	714720	716560		43.6573	40.4661	18.6404	42.4128	28.5715	46.9573	34.4596	47.7147	20.3281	11.5491	52.7748	51.0324	YBR248C
chrII	716769	718129		63.7108	58.6214	19.1837	38.2776	33.0616	72.8847	12.8918	66.3452	21.7245	7.24128	79.567	73.9944	YBR249C
chrII	721321	722431		33.2616	33.4506	32.8346	25.2847	27.1488	27.8941	25.2312	29.4482	27.7887	24.4352	28.5022	34.8741	YBR251W
chrII	722566	723129		67.4334	62.9682	55.1357	48.1953	42.9207	52.1478	58.5007	43.2503	27.1104	27.3058	42.444	58.0334	YBR252W
chrII	723208	723728		43.193	44.7302	45.3562	60.7297	41.283	35.9108	58.9643	34.1762	21.2107	31.4091	33.7953	42.2512	YBR253W
chrII	723572	724279		31.9983	30.5232	29.7647	38.9566	26.5573	29.5015	30.294	25.901	17.0597	17.1642	27.0924	31.9186	YBR254C
chrII	724415	726641		15.3759	15.4143	16.0536	24.716	19.6051	16.8243	24.9505	17.1775	17.3016	16.1286	17.0928	15.5541	YBR255W
chrII	726518	727114		45.1849	45.5009	51.603	84.1141	32.0457	27.6749	55.7432	26.0375	23.4229	36.684	21.1226	41.6831	YBR255C-A
chrII	727330	728109		42.6166	42.5105	53.5777	189.305	43.8855	34.8847	70.9194	33.6064	38.5488	54.0982	33.7654	54.4018	YBR256C
chrII	728853	729866		27.4275	26.2362	15.2324	19.9225	21.9017	27.1518	26.7242	26.8387	8.63854	11.4122	28.657	30.6521	YBR257W
chrII	729670	730194		26.8705	26.3829	25.4157	38.7106	38.4179	38.6353	62.0927	37.9112	16.478	18.0223	32.9117	27.3814	YBR258C
chrII	730326	732596		12.4058	11.8314	11.1736	15.2508	13.2992	14.7137	20.4435	16.8363	7.39415	9.611	14.3	13.7079	YBR259W
chrII	732533	734675		19.1673	17.8563	19.2175	22.5166	19.1261	19.5175	26.063	18.5426	16.8533	21.8248	18.5502	20.6963	YBR260C
chrII	734715	735572		40.264	37.8359	33.4323	36.1465	28.4854	31.8844	34.497	29.3968	22.0719	21.6311	31.914	38.8888	YBR261C
chrII	735634	736086		74.3875	69.1394	63.4226	71.3542	56.8175	62.7295	68.5441	55.9018	39.2779	40.2242	56.3206	69.9021	YBR262C
chrII	736178	737793		38.706	35.3743	22.5603	26.6147	27.6089	39.7303	35.8962	37.1974	19.7748	18.0242	43.9256	43.114	YBR263W
chrII	737734	738406		33.7149	33.2436	39.5189	46.9055	31.171	25.3279	43.9931	24.7157	24.9264	29.1822	25.3783	35.4192	YBR264C
chrII	738497	739678		50.5558	48.8887	30.1085	23.0692	25.3443	40.9652	28.7094	39.1784	18.3418	14.4221	44.3558	52.9703	YBR265W
chrII	739823	741132	1_RiBi	59.0887	54.2254	10.1067	9.00909	15.8799	61.2162	13.5825	54.9001	8.50368	3.52145	75.0948	63.0363	YBR267W
chrII	741268	741726		40.2606	37.3616	41.3903	40.5098	33.9969	37.4511	37.5514	29.2313	20.0608	21.3578	28.9001	35.8305	YBR268W
chrII	742000	742596		26.7875	27.0794	47.5512	57.4584	34.3667	13.5224	47.9741	17.9615	37.0132	50.7888	15.8821	25.1025	YBR269C
chrII	742694	744669		14.1437	15.1633	14.0399	18.0922	8.86893	11.1684	13.8094	10.9369	10.6024	13.4745	10.9639	14.7816	YBR270C
chrII	744811	746262		22.5054	19.8794	6.4393	5.54309	8.69037	19.8674	12.0058	16.8714	7.09813	3.82659	21.5995	22.941	YBR271W
chrII	746177	747849		15.7794	15.6353	17.7106	24.7582	21.2913	18.9246	27.8272	19.6636	19.0903	22.9164	16.8133	16.418	YBR272C
chrII	747962	749401		19.763	19.1268	26.0878	27.5573	23.928	17.8031	33.6936	20.8908	24.7934	32.4072	17.6373	20.5925	YBR273C
chrII	749531	751371		13.0324	12.8843	13.9599	16.5422	11.6868	9.945	17.2295	11.8281	10.4152	15.1877	11.9487	14.2069	YBR274W
chrII	751239	757179		14.3594	14.7776	12.8602	13.8148	11.7467	12.2977	12.9295	12.7185	6.80234	6.61091	15.133	17.8711	YBR275C
chrII	757542	760139		14.4573	14.8379	15.4352	21.646	15.2656	13.1672	24.3296	16.0694	11.6998	15.0855	13.5988	17.8623	YBR276C
chrII	760246	760992		30.5844	33.8868	36.6276	43.3676	25.2717	21.2466	33.3539	17.3116	15.7157	22.2733	19.3733	28.6565	YBR278W
chrII	761209	762739		36.1675	35.1929	37.0305	39.6095	33.1632	29.7738	39.8907	31.3904	32.4946	49.0904	32.7802	41.0933	YBR279W
chrII	762678	764725		10.6504	10.6843	21.7	34.3699	21.4425	11.5508	54.5514	14.7473	39.1268	43.8822	9.83027	10.5708	YBR280C
chrII	764840	767654		16.9809	16.6655	14.1868	14.7681	12.4828	13.3721	14.3632	14.3282	11.2136	10.3144	13.0515	17.6281	YBR281C
chrII	768192	768773		42.4936	45.818	50.6165	66.4669	48.7574	45.187	88.7006	41.3546	28.6983	39.4379	34.2533	40.9504	YBR282W
chrII	768778	770636		65.1942	67.1391	56.0515	49.6715	79.8869	81.8026	142.766	80.2002	49.4205	38.8961	68.8955	71.8108	YBR283C
chrII	770868	773737		6.51112	7.13486	12.1561	19.693	11.211	9.92889	23.8623	12.0428	13.1482	19.3363	6.49282	6.07863	YBR284W
chrII	773813	774428		6.79512	5.85506	12.2589	37.2786	9.47605	4.27732	31.908	6.14101	18.6144	24.6862	3.49561	4.68013	YBR285W
chrII	774686	776381	3_MSN2	53.2019	53.699	81.989	87.8694	88.3335	56.2182	131.202	68.5868	135.876	115.428	54.5736	52.1651	YBR286W
chrII	776537	777966		35.1352	37.2307	83.1885	120.681	88.4599	42.516	158.776	48.2594	77.7305	83.8105	40.9975	35.843	YBR287W
chrII	777813	779520		22.423	21.3291	21.6595	26.2268	38.6366	38.8622	48.6861	35.3465	23.0162	17.5993	27.1482	23.9569	YBR288C
chrII	779604	782442		23.5025	24.2808	23.34	20.7838	19.3645	17.7058	22.8765	20.2129	15.1302	17.393	21.0615	28.0335	YBR289W
chrII	782549	783658		39.6263	40.3136	48.2877	58.8228	52.0122	43.2675	72.5169	43.8343	44.8674	58.0409	43.0899	44.41	YBR290W
chrII	783626	784607		30.1775	29.1031	23.4961	45.9047	29.77	31.1789	79.3825	31.1504	26.659	17.4894	26.1382	29.091	YBR291C
chrII	787005	788647		23.4282	23.4289	20.6837	24.2165	19.5278	22.7264	28.3547	20.8441	13.1207	14.8139	22.4731	23.071	YBR293W
chrII	792779	796655		14.9723	14.6336	17.4686	46.1902	35.74	30.6307	115.667	34.4843	16.4863	12.9558	25.1104	16.3893	YBR295W
chrII	796531	798600		3.07743	3.24022	3.38982	5.69047	5.16072	5.08602	10.5157	5.2207	2.88809	3.01508	5.22017	3.0121	YBR296C
chrII	800458	802174		10.2769	11.1924	17.4427	16.0318	6.69283	4.99435	16.9283	6.20813	4.43597	15.9804	4.10091	8.31009	YBR297W
chrII	802537	804900	3_MSN2	16.1252	17.7322	46.3879	14.0833	11.374	4.12105	7.84672	5.97637	22.8279	63.1661	6.2955	16.7955	YBR298C
chrII	805262	807180		20.4959	22.1331	24.3921	34.5007	18.4573	17.274	24.8428	15.0493	11.6513	17.1504	16.5854	20.3688	YBR299W
chrII	809006	809466		2.58511	2.59004	1.56615	0.939761	2.35472	2.92202	3.8168	3.21165	3.17648	0.827043	3.78435	3.33493	YBR301W
chrII	810262	811501		5.53156	5.3852	6.40619	6.61046	6.18711	4.63254	12.0006	5.51516	6.11842	6.19908	5.35571	5.53538	YBR302C
chrIII	9284	11173		7.20944	6.53359	5.31447	5.93493	8.56261	9.94103	11.1605	10.9038	7.22031	3.73604	9.75259	7.65059	YCL069W
chrIII	12365	13029		20.8123	21.2728	26.0523	27.5581	20.7817	17.8136	20.9958	15.3056	21.5633	23.3339	14.3079	15.9736	YCL067C
chrIII	15414	16939		29.9936	28.2305	102.195	731.747	549.597	347.257	781.455	286.953	132.606	76.484	310.817	63.6676	YCL064C
chrIII	17238	18612		39.72	40.3825	44.79	88.1395	42.876	34.968	77.9616	35.2592	19.8204	25.0059	41.9054	46.8993	YCL063W
chrIII	18672	22171		22.4216	24.4396	22.8025	27.812	17.7384	19.1188	17.6138	18.0731	16.4305	14.8094	23.1235	26.4306	YCL061C
chrIII	22322	23443	1_RiBi	54.1415	51.7263	12.6625	10.9218	14.5511	44.4541	5.84178	34.2753	9.32357	4.63831	49.4311	54.2462	YCL059C
chrIII	23532	23991		85.6919	85.7464	21.7943	12.6654	24.2178	75.1451	11.8375	54.6063	20.335	10.0239	71.1495	73.366	YCL058W-A
chrIII	23903	24386		85.2813	88.932	83.3323	69.0242	55.4666	61.3245	52.062	52.2164	44.7339	54.866	55.8129	71.2324	YCL057C-A
chrIII	24732	27033		28.233	28.4814	43.6837	43.2061	20.2528	15.329	29.0486	17.0302	15.5611	40.0509	17.5443	31.0973	YCL057W
chrIII	26908	27651		35.7682	38.1065	39.0026	44.4715	38.8992	42.2298	44.5728	37.2227	27.2246	22.8417	34.6478	33.4112	YCL056C
chrIII	27913	29020		86.5755	88.8469	82.2507	55.8109	51.211	58.8611	77.4704	50.3546	22.8204	27.4197	52.2157	80.2168	YCL055W
chrIII	31396	34045	1_RiBi	54.3358	51.8673	10.4321	4.53648	17.5819	52.9592	3.87589	49.108	10.9964	4.79265	67.7786	64.823	YCL054W
chrIII	33972	35462		22.4501	24.8182	40.0071	45.7756	31.1675	19.1252	35.5042	22.4667	42.7971	57.2199	21.0032	23.6668	YCL052C
chrIII	35555	37658		25.8233	26.3525	40.234	39.8691	30.8774	21.3185	36.5404	24.6895	38.7383	47.876	22.7891	26.8579	YCL051W
chrIII	37719	38862		57.1124	55.5231	48.539	27.493	27.776	34.6725	18.0239	34.305	217.674	194.372	36.6985	55.5264	YCL050C
chrIII	39588	40796		24.2861	22.7439	30.4088	53.2631	36.0213	31.8625	63.4625	32.1598	53.8259	57.1194	23.0661	19.9857	YCL049C
chrIII	43571	44465		18.6551	19.6601	24.1928	30.0838	17.5616	12.3243	20.4284	12.1347	27.5039	47.4601	15.91	19.074	YCL047C
chrIII	44562	46969		30.4169	29.405	29.9916	30.2208	26.0671	23.7915	29.0307	26.715	24.4036	31.0359	27.813	31.4853	YCL045C
chrIII	47000	48440		45.2398	44.5033	49.2729	46.0567	22.2652	22.3448	28.9209	22.3473	20.0441	61.8682	25.0233	46.149	YCL044C
chrIII	48555	50257		124.476	123.239	176.628	124.586	58.243	42.3095	90.3316	45.9536	71.5468	278.847	50.6218	141.459	YCL043C
chrIII	50780	52520		33.2213	42.7261	333.09	153.988	74.6784	8.31574	105.851	20.3877	402.769	678.161	8.77649	18.6055	YCL040W
chrIII	52624	54948		24.303	23.9213	34.3776	47.1982	29.0771	21.5666	41.3475	20.4199	29.0688	31.7208	23.0394	20.1735	YCL039W
chrIII	54813	56625		9.95372	10.9563	12.7362	32.3094	25.0774	19.297	36.8401	18.1836	22.1704	14.3262	19.4629	9.68352	YCL038C
chrIII	56743	58744	1_RiBi	136.742	127.186	19.8968	4.77223	61.6373	183.548	5.06956	185.123	63.0524	3.37751	215.436	149.919	YCL037C
chrIII	58971	60815		60.7633	51.1814	7.08112	6.01462	23.3681	90.186	6.75581	74.9131	25.4639	10.2613	113.399	61.1116	YCL036W
chrIII	60724	61236		41.5374	44.6779	84.73	104.194	73.8443	39.9263	78.9326	41.4486	137.106	185.76	40.3398	37.0818	YCL035C
chrIII	61601	62732		36.0387	34.258	64.852	94.4106	49.932	20.3103	106.877	24.3267	40.5095	62.5731	23.6456	33.8595	YCL034W
chrIII	62698	63292		18.2055	19.0659	37.6599	60.747	32.3003	15.6959	55.9143	17.6807	24.4708	32.8498	15.0187	14.1081	YCL033C
chrIII	63363	64583		26.3869	25.8878	31.2075	38.5792	28.8617	25.6783	43.0643	27.1762	21.6128	27.7815	28.053	24.2897	YCL032W
chrIII	64571	65618	1_RiBi	87.9601	82.8264	46.145	26.8005	46.1939	80.6383	25.1109	71.2893	45.2507	27.2609	84.2137	88.701	YCL031C
chrIII	65805	68392		25.9809	25.6523	28.8642	162.802	32.0099	30.7293	69.7328	34.3457	40.7868	36.2588	41.626	51.2521	YCL030C
chrIII	68436	69980		32.7563	30.2867	31.7346	66.7108	24.8217	25.5872	46.2744	25.8467	26.9819	35.7904	38.7296	51.888	YCL029C
chrIII	70066	71441		29.0887	28.9818	36.2062	43.34	27.9804	21.7385	42.6869	24.8188	19.8212	25.3861	24.7311	29.6221	YCL028W
chrIII	73342	74020		8.11783	9.34695	11.3938	13.5621	6.87215	5.51752	35.3742	8.31858	10.9685	28.1337	4.03609	5.89301	YCL026C-B
chrIII	75940	78022		71.6289	77.4943	933.155	876.117	888.851	27.5671	41.4783	22.1249	22.3326	99.5962	38.0978	68.054	YCL025C
chrIII	79089	82340		15.6481	18.2161	16.4371	18.3812	8.1719	6.7009	11.9187	6.73491	6.20521	9.7607	8.9712	16.9402	YCL024W
chrIII	91158	92564		74.7241	78.5514	95.0072	47.2468	41.5692	40.3683	35.4766	42.188	37.9614	45.7236	58.553	63.2286	YCL018W
chrIII	92621	94396		28.393	27.1342	31.9677	48.5768	32.3768	29.0046	57.0508	29.6446	17.4594	23.6901	30.0359	30.2396	YCL017C
chrIII	94528	95794		24.9756	24.4011	21.8427	27.2853	22.1531	23.2253	28.7342	23.9097	15.8024	14.9091	27.099	25.6921	YCL016C
chrIII	96177	101266		19.8707	19.7464	21.0744	16.3741	16.7694	15.3507	13.3945	16.0287	10.0616	14.9976	21.0693	22.5762	YCL014W
chrIII	101188	101871		22.436	21.98	22.0262	30.072	19.8648	21.5682	19.1807	23.9924	38.2853	32.9193	21.016	20.2533	YCL012C
chrIII	104537	105580		76.4954	70.7865	72.0149	145.839	51.2571	55.6077	55.231	54.5957	36.2292	55.7585	61.2812	84.6271	YCL009C
chrIII	105562	106863		50.3774	51.1464	52.7938	100.623	32.9205	30.5774	41.7565	30.4955	23.6156	43.544	29.8026	47.8376	YCL008C
chrIII	106997	107521		190.485	194.159	180.902	136.559	94.9676	107.646	68.6308	83.9184	64.7989	73.9596	127.448	181.07	YCL005W-A
chrIII	107966	108929		45.745	45.676	39.9022	34.5656	25.7745	28.2663	25.8615	29.9352	20.7901	24.058	26.6456	35.8361	YCL005W
chrIII	109026	110709		21.763	22.1278	26.2882	28.1369	17.8502	14.7463	19.2571	15.8671	15.0663	26.0139	17.0142	23.2622	YCL004W
chrIII	110548	111711		35.901	36.338	27.3224	20.7426	15.3946	19.2683	8.74106	18.788	12.3189	21.8564	23.2613	39.838	YCL002C
chrIII	111837	112530		58.2493	61.0991	54.6526	60.2586	28.8845	27.784	23.9706	22.53	23.4295	36.6247	30.0286	54.7646	YCL001W
chrIII	117303	118402		40.7157	41.0335	49.261	48.3301	37.4877	32.5868	36.2304	32.1023	21.2024	36.5323	35.4774	42.568	YCR002C
chrIII	118597	119263		46.0934	46.1921	57.9518	64.8377	51.4483	44.4823	49.1935	38.8959	34.6769	41.1757	42.3712	41.7433	YCR003W
chrIII	119476	120559		35.2273	40.1334	89.8994	79.3379	40.3944	24.4699	57.2404	30.3946	43.9076	81.2086	21.0484	30.7037	YCR004C
chrIII	128026	130558		30.2928	31.6637	34.4712	25.3745	25.1783	26.1179	21.7584	28.2502	28.1166	40.7903	30.1049	34.2124	YCR008W
chrIII	130641	131622		46.226	49.4822	73.139	68.4644	50.3209	33.8799	64.3586	34.2742	60.1062	86.4342	32.6877	45.3734	YCR009C
chrIII	133665	137076		24.5716	25.5301	47.3686	67.0559	27.0936	15.1477	55.9995	19.4204	34.501	70.4675	16.392	24.1804	YCR011C
chrIII	137663	139163		625.842	616.041	731.903	449.513	240.603	251.843	356.452	245.507	925.303	1132.17	206.637	594.648	YCR012W
chrIII	141141	142545		84.7535	82.3985	56.4645	45.5801	47.1031	67.8978	24.4579	49.0034	39.8431	25.2969	58.8183	70.4234	YCR015C
chrIII	143603	144664		45.9296	42.8165	9.89374	6.4019	16.8076	37.7396	6.57465	31.2718	12.2019	5.135	44.9216	47.3094	YCR016W
chrIII	144569	147700		22.0985	22.4743	25.6613	23.0376	23.5526	21.0413	32.1568	23.9286	20.0064	20.0635	21.7681	22.0373	YCR017C
chrIII	152688	154044		17.6671	16.7619	20.439	25.1269	16.7232	14.0207	20.3531	14.9257	13.635	15.0426	15.0571	16.7307	YCR019W
chrIII	153934	154699		10.0893	11.305	9.16175	13.9632	13.1485	15.0474	17.5632	14.7106	18.2043	5.99932	15.1957	10.7764	YCR020C
chrIII	154665	155113		35.008	33.8032	25.0646	43.7834	26.3949	31.6388	36.7058	24.4284	20.3693	9.5627	26.4608	31.55	YCR020C-A
chrIII	155261	156052		46.4689	47.3515	31.6181	29.5731	26.6581	38.2185	13.0519	31.2351	142.725	118.903	40.0184	46.7409	YCR020W-B
chrIII	155942	157221		15.3548	15.7886	19.8071	15.8116	19.4196	17.8333	24.4046	18.6511	1055.94	1026.95	17.946	14.4323	YCR021C
chrIII	158282	160472		29.8239	30.7304	35.3124	43.5261	29.791	25.6891	28.5911	25.2686	47.515	50.4959	28.6144	29.658	YCR023C
chrIII	160655	162240		21.2277	20.4835	27.076	43.3638	25.265	21.1131	41.626	22.4565	22.5311	22.2784	19.7526	20.8711	YCR024C
chrIII	162406	163301		371.773	360.53	352.587	326.109	268.792	276.689	165.957	217.412	236.292	164.039	307.136	349.303	YCR024C-A
chrIII	162418	163301		376.238	364.802	356.839	330.016	272.065	279.938	168.016	219.946	239.005	165.888	310.728	353.626	YCR024C-B
chrIII	163869	166424		36.5029	36.4051	32.1041	30.3351	30.0676	33.2545	31.6407	33.8676	23.7039	25.9651	38.0227	37.306	YCR026C
chrIII	166806	168207		23.0485	25.1803	24.3751	29.6739	19.057	16.986	22.5915	16.2821	13.2906	14.9821	18.1316	23.2603	YCR027C
chrIII	170158	172541		23.9374	24.2536	17.9106	17.7458	25.72	29.2363	24.8445	29.2984	17.1704	11.158	32.0484	24.5105	YCR028C
chrIII	172756	173526		50.4386	53.8258	51.0823	48.3385	34.637	36.9269	21.7641	30.1659	30.5159	34.5884	35.1502	49.6006	YCR028C-A
chrIII	173666	176536		23.971	25.7508	41.5202	36.1294	33.3907	20.2145	39.8742	29.2918	55.1632	54.3244	21.8169	24.6083	YCR030C
chrIII	177397	178255	2_RPG	437.348	419.121	176.579	45.4818	447.781	558.016	72.5716	476.423	299.518	28.2166	540.443	423.923	YCR031C
chrIII	179452	186155		12.6966	12.8372	13.2825	12.6336	18.7521	17.8133	14.4662	20.8553	17.3036	17.7894	17.2945	13.1539	YCR032W
chrIII	186266	190277		38.3172	40.0151	41.0498	37.175	33.7202	34.9121	37.9673	38.8949	31.7998	38.5925	38.9622	46.6534	YCR033W
chrIII	190565	191804		64.6752	61.9455	29.6941	18.9253	28.4156	55.3202	13.1596	51.354	27.4341	12.7441	57.0536	68.1983	YCR034W
chrIII	191639	193049		58.821	52.3837	30.2154	30.6409	43.6194	67.6095	38.7458	67.07	28.8957	25.8002	67.537	63.5618	YCR035C
chrIII	193244	194380		51.9927	56.1128	67.6006	112.246	122.926	112.959	153.865	108.125	64.4592	54.6977	82.7072	55.932	YCR036W
chrIII	194366	197228		27.1334	26.2088	20.0959	14.6137	19.5663	24.2366	18.1493	28.1956	14.1876	10.8398	32.4558	33.1648	YCR037C
chrIII	197549	199549		11.9317	12.0002	14.595	19.5614	18.3473	13.7966	26.4125	16.2787	19.5795	14.43	15.1538	13.4623	YCR038C
chrIII	199494	200189		20.576	21.007	25.6214	27.1908	20.4598	17.7351	20.8591	15.2964	21.4681	22.9978	14.0884	15.8005	YCR039C
chrIII	201155	205419		26.4811	25.5447	26.0516	22.6554	29.3408	30.3439	22.8829	32.3391	20.9048	18.7029	33.3782	28.733	YCR042C
chrIII	206093	206702		64.7027	61.7165	56.0073	83.9909	54.2828	54.1844	51.1564	48.5108	30.2162	20.2753	55.0936	56.41	YCR043C
chrIII	206778	207965		47.651	45.5344	44.5933	47.5539	32.9702	34.0726	33.3501	35.5778	28.1147	25.7156	33.9395	44.738	YCR044C
chrIII	209803	210469		53.2606	50.7097	62.3009	51.7464	41.8272	41.5122	42.1929	40.8156	31.1982	45.8452	32.9852	46.3485	YCR046C
chrIII	210570	211633		42.9237	37.0983	13.1561	10.2927	18.1697	38.7626	11.2809	38.5256	12.3823	10.325	53.2781	47.6638	YCR047C
chrIII	211877	213957		23.5925	23.5893	25.8018	23.2421	32.4287	28.323	49.226	31.4832	32.9229	23.7271	30.2334	23.8826	YCR048W
chrIII	214043	214873		58.4233	54.3814	34.8094	30.2687	26.2373	38.5066	25.3798	36.9061	18.0871	22.609	41.2743	59.103	YCR051W
chrIII	214929	216656		45.9737	48.2472	36.8958	46.5394	34.714	45.0618	44.5393	42.2986	26.0333	24.1483	44.7932	44.9009	YCR052W
chrIII	216592	218398		80.0335	78.5419	45.5239	57.8124	53.2471	90.4812	41.0699	89.4078	48.3828	29.2663	102.982	90.6183	YCR053W
chrIII	218307	220170		20.4372	20.2652	9.25757	10.5262	15.4967	26.4149	10.6976	26.9347	16.8391	9.37742	31.1194	23.6945	YCR054C
chrIII	220342	223301	1_RiBi	50.6833	47.2121	7.42321	2.23359	12.8163	45.1719	2.79522	43.0797	6.9122	1.82987	62.8781	61.2039	YCR057C
chrIII	223271	224248		51.5715	46.1208	23.547	20.0834	31.3374	47.0415	30.4466	42.0853	14.6127	8.38011	47.1873	48.168	YCR059C
chrIII	224373	224858		31.9708	27.9517	24.2808	25.3249	33.6005	40.5962	26.4047	29.9086	20.566	13.5715	31.1567	25.3953	YCR060W
chrIII	225504	227816		16.1232	16.8406	38.7387	39.7363	28.4238	16.4166	43.9451	20.9495	69.9914	72.0267	15.1374	16.439	YCR061W
chrIII	231449	233127		18.1922	18.1276	17.1399	18.0134	18.5278	18.8978	15.4533	20.2745	20.306	20.7505	21.4279	20.4647	YCR066W
chrIII	233052	236440		25.476	24.993	28.1646	26.804	19.1559	16.945	24.0098	18.5968	18.0853	26.5868	20.6576	27.7982	YCR067C
chrIII	238889	240108		27.2878	29.5187	45.2313	50.4253	36.5697	24.7312	54.3256	30.9983	36.7943	42.5907	26.9919	27.857	YCR069W
chrIII	240031	240591		46.4098	44.0453	53.7733	54.4614	49.5629	43.1403	50.3025	38.1942	35.4761	40.0045	38.0481	37.9811	YCR071C
chrIII	240727	242385	1_RiBi	50.318	43.9388	7.47242	6.83846	13.6134	46.6582	7.14513	40.0714	7.35312	3.35474	60.0772	56.1237	YCR072C
chrIII	242519	246647		17.7024	17.4466	12.0957	29.9692	36.9864	38.0179	62.2313	38.9231	13.7619	4.97919	29.82	18.0714	YCR073C
chrIII	246925	248024	3_MSN2	27.3674	27.0662	47.2214	39.8898	26.8713	14.8214	34.3485	18.5044	22.7234	37.4058	16.6219	25.5978	YCR073W-A
chrIII	247887	248844		16.993	16.1747	24.9538	27.1389	14.8213	10.0053	18.8253	11.9229	14.6635	19.0881	10.3122	15.5087	YCR075C
chrIII	248940	249284		24.5942	28.8821	37.3049	59.2568	24.2407	15.9696	39.4028	17.4863	27.8526	31.4863	14.5833	19.2973	YCR075W-A
chrIII	249017	250069		20.8559	20.8612	28.5969	38.394	24.2103	18.1361	33.8003	18.8748	23.9237	25.841	17.0391	19.9475	YCR076C
chrIII	250111	252669		38.6495	36.8266	38.38	37.2314	34.2935	32.1713	39.4386	37.2863	29.1847	35.6219	36.1304	42.6074	YCR077C
chrIII	252792	254284		29.9752	30.6022	40.4259	47.2332	38.001	30.4156	71.2492	34.8355	29.4536	30.9305	28.0221	31.4624	YCR079W
chrIII	258702	259378		56.2883	53.3762	64.7566	69.7762	31.3042	30.2642	33.9014	32.4113	36.6608	74.7959	28.4121	50.2474	YCR082W
chrIII	259542	260016	3_MSN2	20.3861	21.4574	33.543	34.5949	24.2968	17.0004	22.7236	17.4499	36.9877	36.2622	13.059	19.0634	YCR083W
chrIII	260252	262713		65.0265	62.7112	60.7574	57.5757	49.7714	46.4558	57.4432	56.1257	42.8223	45.8298	55.8883	71.9849	YCR084C
chrIII	263313	263993		42.4333	42.0537	37.4543	29.4655	32.0875	34.4324	25.8541	32.2587	28.8278	18.333	31.2699	40.3692	YCR086W
chrIII	263801	264512		64.9402	58.9718	16.3321	8.65068	24.8787	63.6826	15.6833	53.1033	19.9587	10.4451	59.4483	57.1453	YCR087C-A
chrIII	265021	266978		32.0036	32.2884	39.0306	46.5011	29.9768	22.7748	46.3632	29.5513	36.56	38.3149	26.4055	36.1044	YCR088W
chrIII	267137	272267		13.8756	13.2998	13.9828	11.9952	18.6015	17.9681	31.1499	22.848	11.4502	8.29319	14.9308	15.8972	YCR089W
chrIII	272247	272909		34.5662	35.6313	28.7214	32.3706	28.7637	37.4318	19.46	32.8269	20.0169	17.4778	33.799	35.2175	YCR090C
chrIII	274340	276685		7.52762	8.10716	17.0375	17.4518	13.3573	7.23093	23.8131	11.497	24.8736	28.1027	6.7882	7.27298	YCR091W
chrIII	276607	279855		16.7635	17.5775	14.7664	12.5497	15.3826	15.9364	15.0026	18.8191	13.3198	11.856	17.2442	17.4251	YCR092C
chrIII	280082	286541		47.4774	47.379	47.6385	42.251	33.6951	32.2824	30.5303	39.2926	39.4428	48.6902	36.9114	58.2766	YCR093W
chrIII	286698	288213		18.6449	17.5803	20.2798	20.5903	16.7884	16.6539	19.38	16.5063	11.3982	16.3371	16.5406	17.6739	YCR094W
chrIII	288109	289314		20.4996	19.7814	17.7083	17.3636	17.0638	19.9382	17.9223	18.2281	13.3536	18.0235	19.3649	21.8898	YCR095C
chrIII	293033	293713		24.7111	24.7899	30.9797	31.613	23.3606	20.6413	25.043	18.2725	26.6781	27.8367	16.1555	19.0733	YCR096C
chrIII	293811	294340		45.4672	47.4585	66.3349	73.7078	57.117	39.7589	35.2571	38.443	59.1034	61.9089	30.0441	35.9599	YCR097W
chrIII	297041	298811		10.581	11.7736	18.2617	56.1081	13.2053	10.1792	27.9293	9.89509	5.89663	8.60701	11.5991	11.7243	YCR098C
chrIII	304283	305536		7.54204	7.12905	8.31824	14.3181	11.9776	10.3215	24.1036	11.1407	5.89891	7.67872	11.9553	8.44927	YCR102C
chrIV	8612	10050		9.2585	9.31458	11.1144	17.0637	11.1392	10.9969	31.9767	12.1104	9.09646	9.69744	6.59764	9.36736	YDL246C
chrIV	11541	13541		5.98996	6.47858	7.12061	13.1231	5.78142	5.14713	11.4288	5.73698	6.40198	7.93016	6.06067	6.80882	YDL245C
chrIV	20520	21299		12.7063	13.0572	13.8016	10.1454	25.2099	25.3467	28.6754	18.0734	25.6949	9.60745	20.9971	13.8792	YDL241W
chrIV	22650	25909		21.1039	20.3218	24.2614	24.7052	19.024	16.5813	22.8463	18.6252	8.89379	14.4137	18.8909	24.4785	YDL240W
chrIV	26371	28919		8.7358	9.66167	14.3859	23.1731	15.6777	11.1482	19.8208	12.2225	13.8632	15.9399	11.6074	9.33753	YDL239C
chrIV	28951	30494		14.205	13.3717	44.6847	174.467	46.9433	14.0554	136.962	18.7057	29.0206	36.4583	14.7108	12.9828	YDL238C
chrIV	30608	31910		20.5686	20.712	45.9018	111.153	45.3169	20.856	87.7595	20.9673	27.4723	33.5519	21.5566	19.7126	YDL237W
chrIV	32228	33417		43.4338	41.9346	47.5972	77.9959	62.9586	51.0516	109.17	49.2927	36.0569	27.8735	55.2141	46.7104	YDL236W
chrIV	33286	34040		49.3787	48.5649	49.0191	70.9483	58.4926	56.1563	55.0784	48.1881	28.6536	35.6711	42.3807	50.5651	YDL235C
chrIV	34145	36619		27.0439	29.1929	36.261	41.8724	34.698	25.3046	71.6752	25.0173	28.9779	47.9686	23.0385	25.2194	YDL234C
chrIV	36774	38342		16.2272	15.9806	20.7184	23.1963	18.8449	14.0716	29.4901	15.4926	12.7706	24.1468	14.595	15.5505	YDL233W
chrIV	38457	38882		65.714	66.1649	67.4799	59.4187	45.1386	45.7163	32.7504	37.6332	33.5235	50.9155	39.6664	58.829	YDL232W
chrIV	38777	42354		29.7737	29.2919	38.4223	52.0657	34.4589	25.7566	53.9844	27.2416	13.9701	18.3758	29.2518	34.4064	YDL231C
chrIV	42646	43767		17.8646	16.8492	20.2518	29.3414	16.6993	15.3951	31.4913	17.4637	14.3945	20.2548	10.7074	14.3051	YDL230W
chrIV	44034	46014		279.954	261.5	59.5068	13.5469	146.134	366.76	22.6699	369.255	106.326	12.3536	417.639	311.756	YDL229W
chrIV	46311	48069		39.3819	50.8675	39.3028	37.4888	7.08478	7.00669	4.83681	7.02428	5.7211	3.1353	13.3775	41.3954	YDL227C
chrIV	50861	52203		40.393	40.3473	43.7266	48.1239	36.7672	32.3813	48.0794	31.3054	23.7006	30.2346	38.8881	45.3366	YDL226C
chrIV	52394	54244		25.6872	26.234	26.0002	25.6061	23.8536	23.3077	26.1343	24.8663	17.8885	22.8403	27.2078	28.8367	YDL225W
chrIV	54154	56718		33.3352	33.5781	38.8802	37.4005	30.2767	25.602	38.1008	31.9697	26.9871	36.5497	28.9685	39.9092	YDL224C
chrIV	57135	60489	3_MSN2	12.7349	11.9622	11.7392	19.8087	18.3306	16.699	29.5559	18.4747	27.554	21.2988	17.5486	11.6588	YDL223C
chrIV	60647	61908		9.10891	9.15473	10.8595	21.8661	14.1544	12.8218	61.7028	14.569	79.2525	94.1513	8.95358	6.66213	YDL222C
chrIV	62097	65037		12.7954	12.8738	12.7535	14.9992	12.6326	11.9428	24.1794	12.2661	13.619	16.7821	13.4784	14.8916	YDL220C
chrIV	65187	65826		28.6064	28.8022	24.0856	27.5723	17.6837	19.973	14.0299	16.1274	18.3351	15.9526	18.8611	26.5878	YDL219W
chrIV	66486	67491		7.27426	6.79455	4.95917	16.8894	9.69092	10.381	20.1438	11.4849	19.527	6.05951	8.87527	7.21647	YDL218W
chrIV	67587	68777		28.9011	29.2539	22.4402	32.1449	29.0281	30.3954	40.8003	30.721	16.0877	14.8768	33.2175	30.9539	YDL217C
chrIV	68679	70328		26.0157	24.0779	29.9332	33.458	28.448	23.6332	31.6245	21.7127	22.4559	23.5517	19.4051	22.2969	YDL216C
chrIV	70486	73918		33.4987	32.6173	50.4796	86.9176	43.2102	34.1989	65.048	37.1299	26.7827	36.2467	34.4336	33.4644	YDL215C
chrIV	74404	76650		7.80031	7.75479	14.9132	38.7417	13.6833	10.6408	38.5789	12.3365	13.9105	18.3234	6.58611	6.37943	YDL214C
chrIV	77165	78005	1_RiBi	45.3654	42.6821	13.0744	10.8488	19.9348	41.8461	21.5037	36.5975	8.49536	3.89679	45.0022	48.8983	YDL213C
chrIV	78359	79203		54.3009	50.1063	42.9172	54.8657	48.5465	49.6044	59.3239	44.884	35.1998	27.8959	45.6497	53.227	YDL212W
chrIV	79226	80490		26.3098	28.3016	28.9993	36.3078	27.6875	24.7101	53.2641	24.708	14.0121	14.6561	20.253	29.0518	YDL211C
chrIV	86074	87267		30.8915	28.2137	16.0199	12.5546	18.9354	27.0669	19.9036	25.5878	10.1665	6.09194	27.4371	30.8787	YDL209C
chrIV	87467	88076	1_RiBi	158.407	152.086	39.5851	10.6478	50.302	150.641	12.5087	120.029	37.233	5.20512	138.761	156.3	YDL208W
chrIV	88209	89939		28.6274	28.2564	27.6479	34.0402	28.5885	28.4459	38.8303	29.3879	22.0238	21.0203	29.7367	32.5473	YDL207W
chrIV	90026	92480		8.3689	8.44894	15.6329	20.3236	16.7409	10.9136	22.3689	13.2331	15.0193	20.9298	9.42895	8.80112	YDL206W
chrIV	92466	93928		35.7082	34.5965	23.5359	17.9315	22.8007	31.0125	15.6352	32.4569	24.4826	22.5579	34.6299	41.7338	YDL205C
chrIV	94591	95788	3_MSN2	14.0316	14.3951	17.4355	31.7181	23.7793	18.3052	46.0968	21.2361	87.1292	80.9427	16.2402	14.167	YDL204W
chrIV	96045	98151		20.2801	18.8482	17.1471	18.1824	15.4641	16.7969	19.4467	16.4338	9.20632	12.8521	17.4792	20.9433	YDL203C
chrIV	98412	99320		49.5688	48.1538	36.6453	24.8747	29.282	41.8077	19.4409	34.0621	26.8086	24.7042	38.8707	46.4624	YDL202W
chrIV	99457	100506	1_RiBi	44.4778	40.6955	12.7937	7.94718	20.2284	44.1786	18.0745	42.6701	20.8876	6.36185	49.1434	47.2808	YDL201W
chrIV	100430	101102		21.4857	19.8183	22.4966	46.2484	22.2742	22.4372	28.655	21.5409	14.1103	14.4595	21.875	21.7414	YDL200C
chrIV	101237	103378		7.63201	8.7224	11.893	25.6419	15.5594	10.4897	37.2603	13.2889	15.6777	18.4583	8.5862	6.62769	YDL199C
chrIV	103525	104667		42.0198	37.942	52.4819	346.038	35.2076	26.8024	57.1694	28.8456	24.0387	31.0776	27.7872	46.7809	YDL198C
chrIV	104753	106872		32.209	32.3304	44.1517	68.4842	25.6991	17.7063	28.533	20.9933	43.506	66.8142	19.1019	30.8233	YDL197C
chrIV	107078	111173		44.9412	45.1635	58.6904	44.8814	38.5185	30.6162	39.5571	36.6781	61.3489	96.2166	37.479	52.5792	YDL195W
chrIV	111371	114402		6.76285	7.13448	8.77091	6.72072	7.63847	5.69495	9.89108	7.03234	19.5919	17.2549	6.23531	7.08034	YDL194W
chrIV	114555	116020		39.9995	37.5377	42.1897	44.5352	34.7017	33.7389	32.523	33.4306	48.4799	61.1886	32.0358	36.3002	YDL193W
chrIV	116277	117141		165.054	155.521	131.087	120.026	109.349	138.834	73.7224	118.825	71.5801	80.2865	142.517	161.205	YDL192W
chrIV	117604	118618	2_RPG	294.938	290.768	102.149	35.8562	279.964	395.338	47.1018	318.746	189.659	15.5851	385.832	306.054	YDL191W
chrIV	118562	121786		24.1081	23.9665	26.5576	26.9684	31.381	26.5593	27.4196	31.3525	28.127	27.5245	30.1838	28.2184	YDL190C
chrIV	121948	123684		30.606	31.7138	33.098	32.9979	33.7356	31.2488	29.5725	30.464	20.6916	20.5092	33.4731	31.695	YDL189W
chrIV	123780	125179		25.0641	24.4912	32.3192	23.9969	27.5965	21.2197	31.9053	25.5673	31.3366	33.8227	22.6265	24.8935	YDL188C
chrIV	125499	126504		30.5295	30.7567	24.0488	19.29	33.4792	43.2885	28.8829	51.6156	51.6752	15.6445	36.6575	28.2214	YDL186W
chrIV	126669	130132		56.1897	55.1088	63.3682	71.5432	83.1036	74.9521	88.5598	88.4985	78.9578	59.9759	84.4564	62.5376	YDL185W
chrIV	130195	130563	2_RPG	826.603	822.282	549.679	161.55	656.692	781.443	105.882	587.19	479.932	170.717	642.616	742.754	YDL184C
chrIV	130813	131912		17.2729	16.0904	18.5073	19.8524	20.4308	19.6409	19.7406	22.3508	18.9851	20.4084	17.726	13.7659	YDL183C
chrIV	133390	134816		92.0131	87.7125	95.8008	108.843	58.4083	61.3294	75.0834	56.1903	28.2823	58.3963	73.0735	88.9908	YDL182W
chrIV	135015	135556		84.2596	103.817	171.844	196.373	60.1795	28.5774	115.939	29.3013	60.6449	177.557	33.4962	71.6528	YDL181W
chrIV	135763	137656		24.665	26.6974	32.3926	44.915	29.9516	26.6403	32.8773	28.5825	30.9613	32.452	32.4578	27.5434	YDL180W
chrIV	138179	139287		64.7899	70.5038	55.4223	84.5479	47.6697	51.0756	29.5511	38.3586	24.6466	19.4664	68.7336	58.3937	YDL179W
chrIV	139496	141188		24.5512	23.8127	24.9173	28.8777	38.3236	38.5365	45.7716	40.8639	29.0198	21.5104	36.0032	26.1196	YDL178W
chrIV	141110	141815		29.9313	27.1233	29.3377	32.747	32.1635	38.9823	29.4711	30.3365	17.0326	15.408	37.1125	25.9464	YDL177C
chrIV	141956	144334		17.9534	16.4249	16.7353	17.2977	19.8035	21.4525	17.7478	21.0194	14.2333	11.12	23.4189	19.2016	YDL176W
chrIV	144305	145550		32.0239	30.9643	31.2702	32.3631	32.502	31.1223	32.0731	29.5749	26.9244	32.317	31.56	32.1952	YDL175C
chrIV	145732	147690		32.8536	31.6709	58.2275	48.6761	81.9083	54.2265	92.3923	58.432	67.2167	65.7798	50.488	32.6207	YDL174C
chrIV	148147	149114		40.7634	40.2395	56.0134	67.0349	62.9883	52.2308	102.243	51.9907	29.9711	40.3293	51.175	45.022	YDL173W
chrIV	149081	155928		42.7994	41.1775	57.0288	80.3891	114.463	68.1497	269.38	71.501	25.3947	16.8894	76.5442	49.4275	YDL171C
chrIV	156289	158071		16.2452	14.2971	18.4877	39.5031	41.3031	23.0603	84.8566	22.5848	17.7316	14.2529	20.7413	18.6877	YDL170W
chrIV	157956	158775		4.00039	3.87647	9.20024	52.3696	10.3398	4.1619	63.203	5.50806	11.8037	18.5517	3.07775	3.65799	YDL169C
chrIV	159503	160818		24.8374	23.2553	19.9214	15.0294	21.5688	23.4083	42.2397	27.6959	36.434	34.1482	19.7513	26.4243	YDL168W
chrIV	160821	163212		39.5161	37.0444	5.58686	4.08928	15.5255	46.4551	9.5941	43.2943	16.7356	2.25258	51.5028	44.2652	YDL167C
chrIV	163370	164115		53.2294	50.55	18.7522	15.2206	23.2185	53.4813	20.6191	41.8927	14.785	10.6315	53.5396	54.7312	YDL166C
chrIV	164240	164901		37.758	38.8813	34.7099	38.8346	32.621	34.6274	37.0725	31.0021	23.4704	22.8909	31.3679	37.0126	YDL165W
chrIV	164836	167266		24.4546	25.0282	20.3205	20.0762	12.3045	12.1086	19.6834	12.354	10.873	12.8468	14.5126	27.1369	YDL164C
chrIV	167697	169201		46.9572	46.2277	47.9881	53.1	32.4704	29.0859	32.2645	31.9162	31.7983	46.9175	38.7781	53.794	YDL161W
chrIV	169167	169635		29.7846	29.5851	30.8526	32.6435	38.8181	37.6583	42.0849	34.3035	27.0479	20.6219	28.4421	27.3616	YDL160C-A
chrIV	169787	172217		40.2843	39.2912	52.2785	53.5326	47.5934	37.7222	47.0993	45.2808	49.3455	66.2937	38.6594	48.085	YDL160C
chrIV	172434	174152		18.9127	18.5895	22.2637	28.8535	23.8833	23.7646	32.8929	23.9431	18.2089	21.7731	21.1928	22.8394	YDL159W
chrIV	174048	174657		33.7498	36.8526	25.7476	22.3053	20.702	28.7242	16.8154	24.9877	25.8419	16.5164	22.2719	31.2383	YDL157C
chrIV	174822	176563		24.4262	26.2989	25.5359	24.4846	14.1387	14.4145	16.0122	15.7058	14.2825	17.5332	15.2727	24.5204	YDL156W
chrIV	176632	178186		36.6685	35.6118	39.1911	29.1713	23.8017	24.8345	19.2516	25.0646	18.7355	28.6358	29.6282	43.038	YDL155W
chrIV	178300	181117		13.1594	13.9841	13.844	17.3293	13.3839	12.32	14.4462	13.6176	11.834	11.1164	11.0793	11.9136	YDL154W
chrIV	181135	183058	1_RiBi	39.6022	37.0394	4.27843	1.81745	13.7132	45.748	5.67994	38.8985	9.65441	1.92978	56.8456	48.4469	YDL153C
chrIV	183231	184708	1_RiBi	37.5446	33.895	9.56317	6.3432	17.9425	41.4274	7.94941	38.3659	13.4807	2.4489	46.7222	40.9382	YDL150W
chrIV	184901	188062		7.96328	8.00136	11.0954	20.0331	10.5528	9.16198	17.7676	10.5536	12.1359	14.4608	8.97902	8.09519	YDL149W
chrIV	187933	190652	1_RiBi	36.7633	34.4843	6.21488	4.05654	15.8539	42.3841	6.79152	39.2311	10.0257	2.22343	49.5984	42.1295	YDL148C
chrIV	190864	192408		73.2306	73.0356	85.991	91.9417	45.5087	35.6443	42.2875	38.2546	44.0113	90.3437	37.4591	81.2866	YDL147W
chrIV	192593	194351		12.8018	13.4866	21.9529	21.3218	21.8126	15.4531	20.7531	19.4903	41.1662	37.862	14.5782	13.5748	YDL146W
chrIV	194407	198459		38.2317	37.3647	41.1286	37.9591	34.6167	31.9164	38.4919	36.8142	25.417	35.5131	37.7368	44.1827	YDL145C
chrIV	198569	199782		41.4681	38.6199	48.9359	48.9311	32.0825	26.8772	47.0548	28.3997	28.4054	40.7507	25.5013	39.6469	YDL144C
chrIV	199955	201682		61.9128	59.3526	44.8951	36.2609	32.3226	46.4899	26.8028	46.2389	21.9507	29.3276	54.2834	70.5902	YDL143W
chrIV	201574	202634		23.9203	23.6488	34.3059	41.0429	32.0295	21.411	36.9043	21.2913	29.9148	33.2085	19.6653	22.342	YDL142C
chrIV	202799	205375		19.2862	18.2526	20.4692	20.8564	22.2419	20.992	25.4306	22.0732	16.3173	18.2331	23.8353	20.6321	YDL141W
chrIV	205255	211103		60.3816	58.8747	60.1698	52.0917	51.461	53.3983	47.1852	64.9338	45.6783	58.7539	65.453	78.272	YDL140C
chrIV	211271	212088		19.0151	17.6165	20.3345	23.3816	23.4872	23.2229	38.0738	25.5567	22.6514	18.1781	20.1227	17.4112	YDL139C
chrIV	213067	215788		32.1207	31.471	44.8036	51.6125	55.5921	43.224	58.7543	46.0017	43.5768	41.3738	47.4938	30.6067	YDL138W
chrIV	215998	217228		123.953	121.15	124.054	111.428	122.091	130.211	98.686	113.292	77.4039	96.3548	137.17	116.855	YDL137W
chrIV	217566	218448	2_RPG	227.202	226.879	63.4779	25.9717	206.003	315.645	35.6423	266.379	129.993	10.581	348.105	249.92	YDL136W
chrIV	218425	219332		51.8359	53.4152	54.1794	63.6855	61.0343	56.6556	47.3489	58.1481	47.5941	37.5811	64.2323	54.2008	YDL135C
chrIV	219594	221307		46.8538	44.271	47.5217	45.3544	50.6529	48.8478	48.0336	51.8998	52.3154	41.7673	51.6334	43.3451	YDL134C
chrIV	221521	221818	2_RPG	628.712	631.937	325.126	80.8366	601.365	687.662	131.307	498.653	464.696	25.1224	544.224	567.155	YDL133C-A
chrIV	222270	223837		38.678	37.0899	35.8727	36.8634	50.7206	51.471	71.7783	53.4909	38.1321	30.4292	51.4796	36.3191	YDL133W
chrIV	223989	226941		21.6055	22.2935	27.58	25.2556	22.2886	21.2637	18.3949	22.6342	17.4903	32.118	20.3075	23.8923	YDL132W
chrIV	227283	228819		69.8939	65.988	64.0602	97.3468	58.0647	66.0317	55.7038	61.0177	27.8021	32.6951	70.2167	72.6972	YDL131W
chrIV	229090	229595		25.6886	34.3272	89.2178	129.105	75.5404	26.8698	132.49	34.4297	126.826	161.785	14.8705	17.2394	YDL130W-A
chrIV	229789	230622	2_RPG	492.62	481.209	176.471	37.3248	468.296	629.802	78.5045	510.821	298.076	13.4665	565.601	455.197	YDL130W
chrIV	230874	231978		35.3214	31.7069	17.2116	14.524	26.3163	39.0392	37.8272	37.7878	36.3096	20.9415	47.18	36.0394	YDL129W
chrIV	232535	234056		50.9341	52.9741	49.5794	55.6044	48.1405	45.9328	55.7431	47.5462	36.0339	32.8525	51.4842	53.0661	YDL128W
chrIV	234855	236025		57.4017	56.8883	48.4582	67.5927	78.0575	85.7209	56.1837	76.6809	30.5714	21.787	64.5425	54.8014	YDL127W
chrIV	236084	238743		70.9951	69.1506	125.796	128.246	55.9149	27.229	82.0603	37.684	69.6045	128.067	29.7258	85.4271	YDL126C
chrIV	238881	239815		122.838	128.268	266.92	172.636	102.616	52.6404	129.57	50.8064	186.42	411.93	42.9251	90.9197	YDL125C
chrIV	240191	241270		62.3056	67.6739	234.088	124.723	72.1103	29.2254	99.2509	31.5696	248.11	463.162	25.1099	53.4894	YDL124W
chrIV	241355	242323	3_MSN2	45.6889	43.683	55.63	52.2727	55.0094	44.5716	101.121	47.4623	72.1077	71.2209	35.4317	39.4792	YDL123W
chrIV	242310	245069		39.8188	39.2123	21.071	16.459	32.8762	50.2088	20.5877	52.191	28.101	14.8318	57.6347	48.2121	YDL122W
chrIV	244930	245626		52.5229	49.7629	19.0378	12.7574	21.0044	42.7375	10.2537	34.8165	15.6084	6.67382	41.207	49.1232	YDL121C
chrIV	245826	246603		47.6004	47.2133	52.1957	51.5034	49.9524	47.9715	55.3872	44.9314	40.7441	38.3819	41.8559	41.2191	YDL120W
chrIV	246534	247783		23.5339	23.423	27.6136	40.9295	37.4601	31.2453	53.4243	30.8542	32.5451	27.2482	24.502	20.2168	YDL119C
chrIV	248169	251374		33.9301	35.3344	30.2347	42.857	35.2235	36.8246	28.4361	32.5453	15.9098	15.7497	47.8356	36.1012	YDL117W
chrIV	251498	253803		31.6791	31.7674	26.1901	21.8272	23.6512	27.7634	24.126	28.2856	20.0381	21.4544	31.9816	39.1172	YDL116W
chrIV	253888	255174		24.0046	25.1098	35.3555	35.9179	26.2754	19.7917	22.9163	19.4642	22.2271	38.7963	20.5352	26.5175	YDL115C
chrIV	256518	258640		17.809	17.8027	32.4929	37.2108	26.9186	12.7531	31.0227	15.0013	27.037	44.5571	13.0797	16.6619	YDL113C
chrIV	258834	263245		20.438	19.1473	8.33657	4.95616	12.5307	19.2684	8.18443	19.118	6.73564	3.31786	21.5338	23.3701	YDL112W
chrIV	263306	264178		57.9368	54.3161	37.8967	31.4012	31.216	46.3765	37.0815	42.2245	29.1007	26.2275	47.2845	60.5133	YDL111C
chrIV	264322	265020		34.5711	38.7989	108.569	142.778	97.0325	41.0768	197.535	55.3148	154.69	199.814	30.1158	32.8767	YDL110C
chrIV	265106	267542		16.7771	15.5478	18.6404	24.3165	19.417	19.3972	32.2305	21.6941	20.4815	19.7562	19.2223	16.7876	YDL109C
chrIV	267674	268785		27.6798	27.3877	26.8837	28.9538	22.425	23.9929	24.8928	24.415	21.167	18.8073	23.3071	27.6959	YDL108W
chrIV	268887	270130		25.069	27.6181	31.8799	54.1216	29.0543	23.2924	35.0933	23.6702	28.6871	27.2776	19.3826	23.3438	YDL107W
chrIV	270221	271964		29.1622	29.4811	40.2637	45.9897	35.6259	26.2099	42.8198	27.0951	33.6897	40.0239	27.5277	31.4462	YDL106C
chrIV	272353	273644		19.7831	21.4591	19.3613	22.3193	14.4639	14.3931	17.3247	16.1894	13.1912	13.9118	17.6909	23.9074	YDL105W
chrIV	273608	274894		17.2523	17.1512	15.3086	19.8513	18.2363	19.749	19.5589	20.3259	11.9244	11.8022	21.194	17.7838	YDL104C
chrIV	275030	276653		19.0547	21.8073	22.7717	25.2519	18.8099	16.1385	21.3324	18.1836	15.6013	18.5904	13.9714	20.4388	YDL103C
chrIV	276777	280378		15.3556	15.8982	12.1416	12.3053	11.3751	12.9569	15.8915	13.9903	8.10378	8.97009	14.607	17.4375	YDL102W
chrIV	280141	281908		18.4407	20.9646	26.6047	28.6638	15.1767	11.3162	14.929	11.6963	18.2571	25.2053	10.5061	21.0806	YDL101C
chrIV	282029	283211		58.6937	61.4523	80.0413	97.5442	43.0165	31.9322	49.657	37.22	41.3523	63.9881	29.5031	65.3075	YDL100C
chrIV	283302	284523		38.0389	42.4831	39.4879	40.2537	38.4038	37.1417	36.0569	37.7141	36.5509	32.8633	31.6192	40.3277	YDL099W
chrIV	284441	285174		21.3944	21.9385	17.4812	23.1801	24.9092	25.5059	27.3125	23.3696	24.4107	18.3101	18.7346	21.6563	YDL098C
chrIV	285305	286752		66.7147	66.6595	84.275	85.8273	39.7109	27.552	51.2355	31.2994	42.1325	81.7085	25.7858	72.0992	YDL097C
chrIV	286978	289591		57.5951	56.268	53.1674	41.1629	28.4551	29.2679	38.3279	35.3015	28.9162	56.1737	33.8486	67.2676	YDL095W
chrIV	289860	292412		15.5769	15.7246	15.1645	15.9294	14.2343	15.7229	13.6221	15.8579	13.0134	11.3179	14.0767	16.1033	YDL093W
chrIV	292748	293359		63.2134	61.878	61.1636	67.8122	57.3384	55.313	59.7491	47.6027	48.9673	43.0027	47.7966	59.19	YDL092W
chrIV	293297	294852		14.2522	15.6184	20.4458	34.1479	23.8556	18.6814	32.8384	20.41	27.815	21.2124	16.8543	14.9248	YDL091C
chrIV	294986	296362		18.1683	17.7608	24.4472	27.3996	28.2898	21.2768	34.3959	23.5688	20.8714	20.003	20.0973	18.6034	YDL090C
chrIV	296520	298342		13.6166	13.4505	22.0978	26.8389	27.0549	18.3822	30.7507	21.3787	26.7237	26.4105	14.5889	14.2566	YDL089W
chrIV	298262	300141		34.9267	35.5496	33.5308	34.2528	35.0431	39.8174	28.7425	43.9322	32.3702	32.0443	43.4741	41.4445	YDL088C
chrIV	301373	302295		59.5687	58.5061	71.8068	75.0092	112.096	107.348	126.147	97.6182	119.004	60.7795	87.8177	53.5102	YDL086W
chrIV	302416	302748		26.3453	31.3138	27.749	29.0015	48.8291	52.4973	42.2268	45.695	37.9989	18.2196	35.9824	24.8776	YDL085C-A
chrIV	303184	304873		17.7127	18.5571	27.2928	34.6807	21.946	16.041	31.4959	17.6338	27.9971	26.6935	16.0359	16.4199	YDL085W
chrIV	305052	306688		79.7687	79.5465	71.0495	64.1797	60.8183	66.6382	43.9922	66.265	63.5519	70.4095	65.1288	80.0732	YDL084W
chrIV	306804	307871	2_RPG	337.587	322.746	90.0781	22.1321	339.103	478.447	43.4042	416.165	214.407	32.6731	457.893	326.892	YDL083C
chrIV	308385	309526	2_RPG	243.466	238.992	61.7501	19.9666	236.329	357.91	45.7871	314.748	158.874	5.42877	370.998	255.804	YDL082W
chrIV	309692	310234	2_RPG	368.017	345.103	112.697	29.5277	261.722	438.182	31.283	335.546	146.045	14.4039	357.269	337.749	YDL081C
chrIV	310490	312665		38.3483	36.7463	32.1403	28.857	35.4829	43.4771	22.9006	42.0516	23.5438	19.7902	40.2951	33.9981	YDL080C
chrIV	312830	314766	3_MSN2	15.0176	14.7221	16.124	12.616	17.0052	18.3715	11.2311	17.2942	18.2298	23.7487	16.5838	13.6214	YDL079C
chrIV	315272	316459		23.7382	24.9589	36.9014	36.5035	32.6745	22.0874	41.0014	24.7352	38.5878	50.293	21.12	24.1006	YDL078C
chrIV	316868	320253		11.3203	11.575	13.2382	15.4504	21.8548	21.2275	17.3905	21.5641	19.8671	13.9555	23.9915	12.2065	YDL077C
chrIV	320461	321698		24.2131	25.2303	33.7252	39.215	44.8464	38.1223	42.9729	40.3843	38.5774	34.6313	36.8999	23.6125	YDL076C
chrIV	322194	323058	2_RPG	340.364	339.349	103.004	32.0494	340.483	472.893	37.7923	381.708	217.641	5.14815	498.22	363.104	YDL075W
chrIV	323952	326232		46.3753	45.8253	37.0909	30.7736	33.8641	42.1316	24.8197	42.4098	25.7033	25.2093	47.9931	49.8183	YDL074C
chrIV	326426	329623		18.1299	17.8513	15.4738	14.9097	18.0442	18.4539	12.2754	19.0279	9.99247	12.748	20.8987	21.0536	YDL073W
chrIV	329759	330517		67.1082	64.0126	116.834	107.789	72.6731	39.8824	96.5912	39.3402	66.5248	121.416	28.6247	57.4534	YDL072C
chrIV	330991	333099		106.028	101.344	108.683	89.0842	72.515	65.5179	61.2376	62.7909	65.384	141.153	66.0232	124.607	YDL070W
chrIV	333981	334453		89.3691	103.088	140.495	254.602	101.052	64.1104	161.218	49.2568	48.5788	87.4249	56.3161	85.2221	YDL067C
chrIV	334799	336264		35.8465	39.4106	75.9558	271.348	71.962	39.4706	139.579	40.5877	30.3801	45.0061	46.2407	41.5976	YDL066W
chrIV	336165	337317		35.6892	37.3267	34.1289	44.7688	33.5577	34.4453	29.8737	34.5622	26.2481	28.8075	37.2635	37.3355	YDL065C
chrIV	337443	338191		39.4691	43.0178	36.4463	31.4983	23.9653	31.7595	18.7733	26.3922	23.3101	25.3778	30.3295	37.8049	YDL064W
chrIV	338114	340234		43.125	37.4302	4.15194	2.10047	11.412	44.9526	3.20142	37.1051	6.54612	2.81593	55.9511	47.7933	YDL063C
chrIV	340459	341219	2_RPG	304.544	303.951	96.0474	25.6383	294.672	396.585	45.084	321.04	194.557	6.90003	389.97	301.809	YDL061C
chrIV	341598	344105	1_RiBi	42.6385	38.319	6.71055	2.28231	20.1555	52.7721	5.06393	51.3817	9.92606	1.69285	64.7006	46.8735	YDL060W
chrIV	343976	345065		17.3479	18.3082	17.9275	26.2712	15.8247	17.3691	17.9107	15.9721	10.114	11.2123	16.7501	16.0955	YDL059C
chrIV	345609	351182		19.192	19.1968	18.6678	18.5484	23.1199	23.234	16.5142	23.6328	13.0325	13.1762	27.682	22.478	YDL058W
chrIV	351398	352462		17.2962	17.4641	21.8786	57.7566	32.4028	23.9212	72.7286	25.2866	31.3059	21.4274	24.4036	15.9691	YDL057W
chrIV	352761	355470		26.3834	27.4965	27.3562	25.4753	25.6811	25.8542	22.0085	30.4431	30.1638	27.1707	29.8414	31.1055	YDL056W
chrIV	355430	356907		314.7	326.036	261.57	256.993	132.936	174.845	75.4272	156.419	70.3198	61.1371	171.217	323.243	YDL055C
chrIV	359736	361373		12.0063	11.6908	15.3084	41.751	14.9829	13.4059	24.7508	13.6192	13.4694	19.7744	11.4965	13.5034	YDL054C
chrIV	361509	362365		35.3957	34.8231	40.3846	37.7261	38.02	42.987	44.1915	43.9882	33.7692	27.7047	42.3683	39.4813	YDL053C
chrIV	362614	363634		72.2457	71.1291	67.7297	69.8663	56.6905	60.6972	55.0771	53.5822	50.3761	55.9753	53.3819	67.2571	YDL052C
chrIV	363902	364882		108.255	98.2985	21.173	13.9401	22.4856	90.433	9.80326	71.5924	15.1972	6.99054	96.7635	98.6174	YDL051W
chrIV	364978	366002		32.8486	32.1466	29.4735	50.4386	26.6295	30.1096	33.2224	26.9214	23.5953	24.3736	31.7318	29.4246	YDL049C
chrIV	366622	368319	1_RiBi	26.1218	27.215	46.1055	36.3788	22.0231	19.6703	38.7196	20.2621	42.3176	55.5637	20.8151	22.5587	YDL048C
chrIV	369526	371010		53.6549	54.4731	47.9765	42.1461	40.3766	47.047	36.9189	45.9084	34.308	40.8852	48.6548	56.1726	YDL047W
chrIV	371144	372039		65.3025	65.5439	109.489	111.013	85.2454	57.3374	139.599	63.8487	113.891	123.222	50.3914	62.3832	YDL046W
chrIV	372198	372654		63.9977	62.4915	72.3049	75.6182	73.4999	60.0523	91.0183	56.0257	61.917	67.3628	44.6409	51.697	YDL045W-A
chrIV	372628	373772		22.5753	23.3012	27.6909	32.2284	22.0652	21.1006	28.4302	22.5613	22.7796	23.5082	21.1535	20.9287	YDL045C
chrIV	373885	375313		22.716	23.2499	21.2659	21.1453	25.3573	27.7651	19.407	30.0614	21.3539	17.8588	29.0488	25.6163	YDL044C
chrIV	376594	378504		25.398	23.0082	14.6064	14.7467	14.0886	21.7794	23.6182	20.43	9.80353	8.8757	25.8391	28.7298	YDL042C
chrIV	378761	381496		28.2608	28.661	23.43	19.1646	24.537	27.7687	19.0085	29.534	19.7242	17.7723	30.177	31.0969	YDL040C
chrIV	387374	388908		32.9314	32.8629	22.6895	20.9014	25.5189	35.8808	25.8382	28.2686	37.0519	18.0163	41.3378	35.672	YDL036C
chrIV	389038	392339		24.882	25.2714	29.3228	40.1313	37.7597	35.681	44.3712	39.3635	44.1403	36.1911	39.3286	27.9809	YDL035C
chrIV	392477	393957		43.4156	44.9643	43.358	55.6746	34.1785	34.4059	61.4724	39.2563	25.3165	27.3935	35.9327	47.1412	YDL033C
chrIV	394154	397292	1_RiBi	33.3945	30.8998	10.3121	7.92768	15.0002	31.0489	8.19579	29.7608	11.8158	4.10049	37.7095	35.8538	YDL031W
chrIV	397456	399218		23.2194	22.0252	19.3043	23.6484	17.2314	21.4542	18.6515	20.9743	15.8026	17.3373	26.3076	22.9213	YDL030W
chrIV	399305	400766		43.754	43.6106	62.256	64.0837	44.5046	30.0714	50.0425	33.0901	44.6891	61.2597	34.2342	45.6072	YDL029W
chrIV	400850	403465		25.0294	26.9162	30.5317	27.9682	22.0124	18.6799	19.769	20.2303	19.2291	26.8924	21.3442	28.1785	YDL028C
chrIV	403528	405001		15.7882	17.689	28.9907	35.1592	20.9261	12.8867	21.7397	15.2769	30.0816	35.7764	12.3858	13.9007	YDL027C
chrIV	405144	407414		17.4297	18.9705	32.0071	46.2155	26.4662	17.8608	39.3553	21.4844	35.9319	45.2797	18.4432	18.705	YDL025C
chrIV	411749	413133		49.1721	58.2852	266.426	142.109	81.1646	18.6043	187.673	36.1357	392.472	673.111	16.6752	48.2374	YDL022W
chrIV	413927	414952		19.1219	21.218	31.3279	55.2173	20.1702	15.14	31.0086	15.8964	42.8014	66.14	13.1422	16.3781	YDL021W
chrIV	414965	416959		79.0503	82.6031	97.7718	79.0182	53.1477	39.5437	82.7802	40.6391	342.664	389.207	37.4591	81.0062	YDL020C
chrIV	417522	421725		16.2977	16.9922	33.262	26.6422	25.7988	14.5119	30.0509	21.0837	63.2964	84.0566	16.5141	16.8866	YDL019C
chrIV	422644	423581		28.7353	31.0392	37.4771	37.8898	27.5511	18.6788	32.4513	18.797	40.8808	36.8448	19.3665	26.2976	YDL018C
chrIV	424098	425795		17.9331	16.7236	18.5263	18.1936	16.3348	15.3424	21.9716	16.1646	16.8565	18.4466	20.2886	18.98	YDL017W
chrIV	425775	426985		53.419	52.892	43.5481	42.831	42.1422	47.2852	35.034	45.6374	51.4898	46.0931	51.2435	54.1826	YDL015C
chrIV	427213	428562	1_RiBi	161.297	145.081	20.3031	6.07382	43.6235	172.137	6.90084	175.483	42.3051	5.12473	207.687	184.07	YDL014W
chrIV	428928	431034		27.2387	26.5137	26.2317	29.8979	32.7083	32.527	44.4509	36.7401	19.5151	27.0727	38.9353	30.8576	YDL013W
chrIV	430954	431539		64.8905	63.2437	60.2166	41.3204	48.3487	48.3047	48.9859	46.0132	33.4132	48.6337	49.6667	62.5426	YDL012C
chrIV	432284	433303		31.4954	35.4867	49.6722	62.6739	28.8602	19.616	53.9201	17.4252	18.8817	38.7305	18.1292	31.8489	YDL010W
chrIV	433465	434134		88.8016	81.1188	70.3875	69.991	53.1305	66.3344	43.3737	56.8833	36.6338	34.9162	68.7099	78.1325	YDL008W
chrIV	437998	439443		56.6974	58.6916	73.0118	70.1289	27.6142	20.1801	35.8755	22.72	26.2886	69.9604	22.8699	66.1958	YDL007W
chrIV	439586	440870		31.7953	34.5332	38.0974	36.7551	25.429	22.8071	22.4818	23.1985	19.729	29.6271	26.1444	33.8205	YDL006W
chrIV	440782	442369		33.7012	34.3362	36.485	32.2248	26.6551	27.1562	24.2574	25.0651	22.323	37.6373	29.3812	34.6491	YDL005C
chrIV	442956	443710	3_MSN2	71.0396	82.0979	102.547	71.9556	44.4037	28.7897	36.7537	25.9272	43.4304	93.5924	35.361	69.3245	YDL004W
chrIV	444557	446500		57.711	64.5617	52.3991	47.0896	19.2675	19.0966	11.4937	17.5316	19.5541	24.3228	21.6021	57.95	YDL003W
chrIV	446679	447684		39.8948	41.4708	45.5936	46.895	38.0699	37.5001	36.4262	32.7227	47.5003	47.1305	38.3086	39.8237	YDL002C
chrIV	447902	449393		26.2237	26.3407	26.6348	25.7881	19.1653	20.2949	16.102	19.1358	13.8707	18.175	24.2029	28.4215	YDL001W
chrIV	450106	452742		24.7643	26.8249	82.6797	108.863	79.5851	27.507	133.881	47.0953	176.402	203.938	26.6789	22.6039	YDR001C
chrIV	452963	453835		96.3188	96.3352	77.7663	85.1807	63.6612	77.9102	84.5045	70.1462	97.1364	96.6363	81.6434	100.513	YDR002W
chrIV	454075	454819		41.5366	41.8989	80.3068	101.794	45.1204	34.7698	67.7969	29.482	119.335	160.672	29.0134	40.7612	YDR003W
chrIV	455200	456811		33.9795	36.9037	42.1165	51.3075	36.1046	28.7857	36.4326	28.1648	26.92	31.1389	31.1673	35.2993	YDR004W
chrIV	456666	458303		34.3543	34.809	56.3408	52.7452	35.5858	25.0529	32.0492	24.9005	29.6282	57.5826	26.8486	34.8045	YDR005C
chrIV	458452	461396		40.4982	39.6457	35.8848	30.4216	25.5666	28.9747	29.8108	31.6497	27.5083	37.3808	35.9211	46.3217	YDR006C
chrIV	461609	462656		56.6849	56.3801	74.8924	67.9163	38.6509	30.1864	46.7719	27.5446	35.453	58.3457	29.3731	50.0692	YDR007W
chrIV	463279	465550		36.0852	38.8465	36.0615	23.4626	20.6545	22.583	19.5156	18.2882	19.178	28.648	20.9153	25.9722	YDR009W
chrIV	465578	470605		170.061	174.837	178.581	93.9926	117.011	102.826	55.7407	111.337	164.234	225.513	159.96	214.045	YDR011W
chrIV	471803	473020	2_RPG	345.881	318.485	99.6345	31.7441	175.292	365.473	41.9117	368	157.164	23.7528	389.839	346.517	YDR012W
chrIV	473139	473872		44.7594	40.6124	37.807	41.0152	29.0877	32.5057	22.8417	32.8236	23.4075	22.7999	34.9838	42.2117	YDR013W
chrIV	478352	478792		37.2425	42.1962	60.1891	79.0175	35.1258	20.5911	41.9387	18.8883	27.4156	46.9715	18.5326	31.3676	YDR016C
chrIV	478943	482279		36.6138	37.557	34.4719	42.2096	28.3922	28.9279	32.8045	30.7438	19.7111	19.1383	38.2865	42.121	YDR017C
chrIV	484005	485414		12.5188	13.2722	15.2661	70.2157	40.6045	35.8216	232.516	47.7067	35.2074	15.1892	23.1366	7.71644	YDR019C
chrIV	485451	486563		32.2144	30.3629	14.5	32.1555	22.4283	31.9565	66.2802	29.863	12.5972	5.55218	31.6315	30.2728	YDR020C
chrIV	486695	488055	1_RiBi	26.6818	24.5977	7.15526	16.7357	17.9174	32.3235	32.0198	25.5816	11.2014	4.29747	38.94	29.9688	YDR021W
chrIV	487965	488668		20.7307	22.0403	26.4406	63.0938	21.7839	22.2245	61.2985	20.5545	16.4732	25.6132	23.7292	20.3477	YDR022C
chrIV	489432	491053	1_RiBi	84.1111	80.0613	36.3674	37.8117	65.463	109.644	36.4525	101.897	53.5131	15.301	121.895	92.9296	YDR023W
chrIV	491449	492413	2_RPG	400.485	404.992	115.356	30.0708	359.54	500.517	48.998	409.408	209.451	11.6578	482.547	384.538	YDR025W
chrIV	492469	494416		30.5029	31.8699	25.6737	28.0906	36.9787	38.5942	32.1906	41.0333	24.4625	17.0076	42.7453	33.721	YDR026C
chrIV	494574	497447		21.59	22.726	32.1706	32.4655	28.3737	22.2931	29.5839	25.2227	29.3474	36.8367	24.9317	24.7254	YDR027C
chrIV	497555	501379		31.7924	32.8576	38.3656	43.2836	42.7343	32.7552	51.2514	40.0005	39.3396	43.2802	37.8247	34.7746	YDR028C
chrIV	501638	503279		26.5372	27.5401	27.2473	30.5241	23.8309	23.6234	22.3809	21.4815	20.3366	26.8975	21.3889	22.4239	YDR030C
chrIV	503451	504011		13.9892	14.2285	22.7106	26.2091	18.5751	14.4307	18.7692	15.4154	32.3165	41.3584	12.7449	10.8462	YDR031W
chrIV	503944	504762		23.1584	25.1928	65.9406	60.8616	28.1541	13.2419	39.9039	16.7897	43.585	81.1489	12.2318	18.7843	YDR032C
chrIV	507777	509549		177.329	157.235	203.425	138.499	95.2098	85.0047	31.0629	71.914	127.896	124.409	134.286	152.773	YDR033W
chrIV	509494	512250		31.4103	30.4269	32.2613	45.1357	38.5074	43.7621	40.2804	46.6186	33.6615	25.8018	47.9112	35.1995	YDR034C
chrIV	521725	523148		42.6293	39.7823	32.7547	105.303	37.1908	47.1168	40.7182	47.4591	29.8959	24.2692	46.8604	50.8757	YDR035W
chrIV	523137	524783		20.9504	19.8927	20.9388	29.5783	19.074	21.3564	35.7894	21.5497	15.1916	18.1834	22.7985	20.9447	YDR036C
chrIV	525278	527282	1_RiBi	113.814	108.454	36.9253	64.6067	80.3065	164.449	53.4588	152.565	81.58	24.1704	190.353	137.644	YDR037W
chrIV	527277	530791		25.0314	24.2336	26.4426	39.0923	35.4813	27.9897	73.0571	30.1139	28.695	27.4963	33.295	27.453	YDR038C
chrIV	531187	534676		24.6523	24.0979	27.0731	40.2407	35.6606	27.2046	75.2339	28.7518	28.4316	27.7634	31.6626	26.6361	YDR039C
chrIV	534970	538894		18.1606	17.7675	24.4686	37.3398	35.7058	22.2656	76.0177	25.0745	30.9983	28.7214	27.2415	20.3916	YDR040C
chrIV	539759	540573		41.17	42.1408	58.6363	91.6516	51.3212	32.4524	117.885	28.5957	44.6411	49.9192	32.0164	40.1991	YDR041W
chrIV	542553	543569		61.0302	65.0811	136.218	106.618	413.04	275.194	412.448	258.697	341.579	175.571	191.598	49.1058	YDR043C
chrIV	546388	547765		23.1162	24.1602	26.5579	25.2041	61.8584	56.3907	86.7219	54.6682	74.3196	12.6001	50.6235	21.0295	YDR044W
chrIV	547839	548467		46.8325	43.2198	22.8302	14.1271	20.4789	36.8041	9.981	30.1727	16.1872	9.32213	39.93	47.1356	YDR045C
chrIV	548682	550668		69.7796	67.4456	124.706	42.7954	41.4036	28.5334	7.96084	25.6918	15.6096	29.0763	34.5244	75.1103	YDR046C
chrIV	551389	553027		71.1978	71.5821	78.9543	32.9458	39.3329	40.883	18.8068	33.741	34.4603	50.5523	44.4684	68.155	YDR047W
chrIV	553224	555249		24.2921	24.1399	19.1921	22.8014	17.1354	20.7129	18.3405	20.6415	11.8304	14.0358	24.45	27.4357	YDR049W
chrIV	555646	556500		527.092	491.73	448.405	487.537	330.494	412.727	628.99	341.702	342.329	719.615	365.645	503.831	YDR050C
chrIV	556993	558104		37.3443	37.9267	36.0727	33.5551	31.3642	33.9149	39.475	33.3224	37.7	50.4809	33.3407	37.0349	YDR051C
chrIV	558263	560777		35.1861	35.5758	33.3091	33.2311	26.5538	28.1905	30.1445	30.0704	18.9029	24.6407	33.3592	40.7987	YDR052C
chrIV	560970	562528		45.5766	47.5299	49.8208	50.1502	44.3279	43.2635	44.5746	48.0285	50.9473	60.9896	52.1086	52.15	YDR054C
chrIV	563446	565020		65.8699	73.2553	67.2838	184.829	168.303	144.808	329.444	95.9552	66.1003	38.8383	166.651	54.6566	YDR055W
chrIV	564917	565750		38.3969	38.303	39.6931	51.1077	39.7624	37.6839	38.5008	31.7357	32.991	31.569	44.3809	36.2071	YDR056C
chrIV	565877	567633		15.5713	16.2759	15.5024	16.8198	18.9137	19.0847	16.0308	19.737	17.6342	12.9568	21.1122	16.9606	YDR057W
chrIV	567588	568734		6.82931	7.14104	8.84463	15.8561	12.3353	10.1519	13.9887	9.88771	14.7418	14.8573	10.5851	7.3193	YDR058C
chrIV	569094	569824		18.2095	20.3818	29.5452	56.7169	23.3715	19.2358	53.1665	17.6562	22.3223	32.0363	17.2774	18.8794	YDR059C
chrIV	570553	573815	1_RiBi	50.8175	47.7025	9.48283	7.07373	17.4315	52.5332	6.97467	45.0722	9.92788	3.08857	66.8655	62.1587	YDR060W
chrIV	574107	575894		24.4114	24.0319	28.5416	30.7339	29.5522	26.3504	31.6588	27.6817	21.5839	39.1331	27.6495	26.4127	YDR061W
chrIV	576067	578447		39.9854	40.3428	34.4387	32.4474	43.2623	47.831	36.335	49.0205	41.2857	30.4863	53.5809	42.7451	YDR062W
chrIV	578533	579242		61.7283	63.984	75.5775	72.0546	79.5214	76.9286	64.1739	74.9851	94.3861	66.6859	57.1698	48.8491	YDR063W
chrIV	579358	580549	2_RPG	536.325	520.33	144.479	32.4746	531.072	741.259	43.9556	593.504	332.86	5.61828	743.077	545.221	YDR064W
chrIV	582707	583535		30.8546	32.5221	42.1881	50.399	40.6645	37.7984	39.2593	37.0274	44.2191	32.822	32.0558	30.8074	YDR067C
chrIV	583658	584819		24.7747	28.2939	29.6835	42.5993	34.769	33.6703	45.0861	31.7221	31.7165	24.6369	34.514	28.9194	YDR068W
chrIV	584636	587780		14.4947	14.1845	19.508	23.6174	27.3121	23.5511	31.7316	26.8343	46.4742	28.7824	21.4981	15.1925	YDR069C
chrIV	588020	588456		26.4945	25.194	38.3853	65.1739	36.8098	25.2114	87.5121	25.7679	77.022	49.7793	18.9085	21.7963	YDR070C
chrIV	588743	589542		53.0991	60.8611	65.7183	60.5549	47.7027	43.9782	43.5315	37.8987	68.2736	82.9774	41.4388	54.5949	YDR071C
chrIV	589662	591538		54.197	53.2159	76.4385	53.838	50.6913	38.7996	39.8867	41.5818	63.608	63.5512	38.6577	53.6633	YDR072C
chrIV	593676	596825		32.0633	37.3296	195.665	94.5769	81.0776	25.0422	76.7766	40.1561	454.586	584.25	23.0915	26.5484	YDR074W
chrIV	596951	598245		28.0645	27.7533	17.2192	20.7941	18.2758	23.6936	15.5529	22.6498	16.2794	11.8441	25.0436	27.7435	YDR075W
chrIV	600726	602135		305.714	326.825	749.635	832.181	1081.58	878.061	1089.72	1165.71	806.518	609.771	751.775	283.88	YDR077W
chrIV	601868	602884		47.5741	50.9001	110.163	135.982	206.528	164.922	171.382	155.645	164.751	117.052	126.505	51.7149	YDR078C
chrIV	603028	603690		33.1913	31.4897	41.6233	51.8664	39.305	35.2561	43.632	31.9952	41.3484	40.6174	27.2652	28.8639	YDR079W
chrIV	603378	603884		35.2316	34.8383	39.3137	46.5378	40.3048	37.0199	39.0679	33.8323	40.2845	36.8547	29.9407	28.7945	YDR079C-A
chrIV	603974	607158		11.1123	11.1222	11.7406	14.3005	13.2904	13.322	13.2593	14.842	12.7893	11.7664	13.6615	12.1026	YDR080W
chrIV	607160	610166		21.0832	20.7804	18.132	18.5855	20.5903	22.302	22.178	25.241	12.9563	13.9071	24.3877	23.9705	YDR081C
chrIV	610347	611981		28.9869	27.2617	20.3221	19.2776	20.777	25.5455	21.6752	24.5792	12.1518	13.7263	25.6166	28.1791	YDR082W
chrIV	612049	613367	1_RiBi	30.8655	30.1329	6.87951	4.23332	12.2472	36.6502	6.56921	30.0026	7.94656	4.53253	41.6757	36.4709	YDR083W
chrIV	613201	614072		26.2948	27.5574	32.4643	35.6815	27.6901	23.9758	25.2702	22.0787	19.9298	27.1078	21.7757	24.7483	YDR084C
chrIV	614198	616294		12.6963	13.7392	24.4501	44.2318	49.2078	27.0931	67.9569	35.3583	38.8297	34.006	16.5759	11.2662	YDR085C
chrIV	616730	617289		91.1325	96.2946	94.8623	113.831	113.42	103.136	96.2252	87.8008	82.1986	84.4523	76.5774	88.9117	YDR086C
chrIV	617375	618364	1_RiBi	66.7339	61.4003	21.6456	21.2432	22.5952	56.4297	23.9247	50.2507	9.62391	6.79958	63.0535	67.5806	YDR087C
chrIV	622067	624813		19.6344	20.1076	36.2147	49.0414	20.678	10.0365	53.3919	16.8137	21.2049	23.5377	11.2656	18.6024	YDR089W
chrIV	624824	626116		25.3986	24.8888	47.9959	124.986	72.0372	25.4653	206.334	25.6076	17.5175	18.8732	24.4302	27.326	YDR090C
chrIV	626372	628604	1_RiBi	59.4279	54.6748	19.0549	45.3323	29.3258	55.1089	57.9972	55.134	16.2638	4.95752	61.5125	65.1181	YDR091C
chrIV	629840	630700		49.5441	48.5809	51.1548	53.9433	36.4324	39.3841	67.8464	36.6345	19.5369	29.4681	39.2392	45.7102	YDR092W
chrIV	631014	636173		26.8215	26.2057	27.9209	19.384	24.7047	23.5368	29.7086	26.0626	20.8829	29.9153	27.4144	31.7832	YDR093W
chrIV	639942	643928		17.5669	19.6012	14.262	15.4023	7.3228	9.26558	10.431	9.06004	4.12067	6.29386	13.997	21.5557	YDR097C
chrIV	644126	645035		49.811	55.6758	45.934	52.0154	37.069	42.02	57.4846	38.312	20.6857	25.2766	41.7335	52.0457	YDR098C
chrIV	652780	654650		56.9389	60.9453	116.506	115.417	100.921	48.313	121.715	59.6939	100.799	133.006	45.3724	63.1438	YDR099W
chrIV	654968	655571		22.4533	26.7477	44.3686	55.9592	35.147	19.1934	47.9574	21.6158	40.7896	63.0482	18.2744	21.592	YDR100W
chrIV	655565	657492	1_RiBi	55.9358	50.7159	7.62307	4.48478	12.0803	52.5346	7.68285	47.29	5.81134	3.96253	70.0103	67.7497	YDR101C
chrIV	658303	661142		25.2199	25.2671	22.5628	22.108	21.8743	25.4525	24.5699	27.4479	21.5187	24.0957	28.7539	29.1385	YDR103W
chrIV	661026	664946		9.76154	8.6461	8.82197	10.7575	11.9638	12.1486	16.0972	13.5086	9.47057	7.90073	12.0105	11.4088	YDR104C
chrIV	665249	666841		16.071	15.5764	20.3992	23.3718	17.3717	13.4763	24.9736	15.397	18.1541	20.0369	12.6691	16.4768	YDR105C
chrIV	668873	671059		21.0747	22.8269	22.1159	26.9307	26.8856	29.1683	30.7112	29.6909	17.0498	23.315	23.5361	23.3026	YDR107C
chrIV	671200	673412		15.7997	15.649	16.0352	20.8462	16.5684	16.3481	21.7202	16.4724	9.26467	12.6086	16.1571	17.7483	YDR108W
chrIV	673399	675667		15.8015	15.4314	13.9267	17.6444	15.5419	14.6381	22.6154	16.662	14.5104	12.602	16.2619	16.6859	YDR109C
chrIV	676045	678008		22.75	21.8868	11.2005	10.5044	11.9366	22.0179	15.0383	22.1315	12.7709	6.60876	24.6981	27.026	YDR110W
chrIV	678009	680015		19.3635	19.2639	17.8544	11.8197	16.5024	16.2623	41.051	23.1766	17.5234	14.6714	15.0881	26.0195	YDR111C
chrIV	680419	681717		29.2193	30.9412	39.5378	41.4006	37.033	24.6977	81.2349	30.3123	23.3608	26.217	19.0325	31.7408	YDR113C
chrIV	682117	682612		45.3638	44.3757	58.571	68.9379	51.131	38.1065	80.2631	31.6171	55.2353	56.0663	33.6982	42.9776	YDR115W
chrIV	682599	683614		31.903	32.8026	40.0218	42.9614	35.883	28.4089	42.1771	29.7017	35.9858	36.282	28.2464	33.0176	YDR116C
chrIV	683898	685687		19.4497	18.1697	21.8247	23.4006	18.4699	16.455	20.4848	17.8737	13.8708	19.2546	17.2466	20.1424	YDR117C
chrIV	685850	688032		22.7642	22.4821	20.2065	22.1495	18.967	20.8067	19.7719	19.6076	14.0108	14.2112	19.9216	21.2178	YDR118W
chrIV	688116	690615		36.9046	35.5123	38.3629	40.3944	56.2338	54.6193	61.5483	56.746	55.2506	28.3696	51.6637	38.862	YDR119W
chrIV	690964	691460		16.6345	15.4444	70.9345	49.6062	133.224	47.4178	175.602	70.3966	310.09	173.805	27.3963	9.07871	YDR119W-A
chrIV	691332	693261		32.9214	29.4886	8.20894	5.58316	15.961	36.2769	10.9069	35.6203	16.1011	6.67536	44.6756	36.6778	YDR120C
chrIV	693440	694283		33.1237	31.8004	27.821	16.6349	22.3683	28.3701	24.0612	26.6429	12.4176	12.8611	26.0849	34.1321	YDR121W
chrIV	694381	698104		19.7197	21.7577	38.6524	40.3335	25.4668	11.0128	39.1506	16.4838	28.622	51.696	13.1237	20.3715	YDR122W
chrIV	698024	699506		25.8294	24.3854	15.4456	17.3502	12.7285	14.3789	15.0942	14.8558	13.737	35.0556	17.9229	31.2976	YDR123C
chrIV	704378	709303		34.3366	33.361	26.0673	64.5798	25.0963	30.4292	21.2536	34.0102	18.5212	20.0841	32.0093	47.776	YDR127W
chrIV	709503	713206		16.9131	16.0314	17.3843	18.1825	14.8985	15.0523	21.7946	16.1748	11.4097	15.8754	17.4728	19.1223	YDR128W
chrIV	713192	715450		38.1907	39.4845	62.3901	58.5691	58.1055	32.4168	79.6205	39.2371	85.7201	104.357	35.6327	39.9635	YDR129C
chrIV	715459	716648		33.0264	32.641	48.5494	42.9717	31.5727	22.9851	28.4857	21.5274	31.445	49.1868	23.4666	34.0974	YDR130C
chrIV	716703	718557		14.8243	15.2308	18.3631	27.5745	20.217	16.9377	23.9869	17.0341	13.9203	15.6591	15.448	15.4431	YDR131C
chrIV	718697	720422		20.0201	19.2433	22.0903	28.0721	23.8907	21.8099	27.0625	23.4372	12.287	12.7257	22.1348	21.984	YDR132C
chrIV	722911	727592		24.8276	23.7985	30.1221	37.0511	36.2161	29.7921	39.4027	34.7228	43.7632	45.4368	30.7498	27.3296	YDR135C
chrIV	728152	730388		20.5777	19.2271	21.4661	26.4689	23.4234	20.5645	33.8933	20.0662	19.7798	18.0568	21.2907	20.8261	YDR137W
chrIV	730543	733490		24.0644	23.2443	21.7431	23.6241	24.8301	26.2936	32.5742	27.6539	14.4322	15.1572	29.3307	27.6904	YDR138W
chrIV	733442	733978		38.5419	38.5354	40.832	44.6025	31.3554	28.0218	22.2517	26.7817	27.3812	32.6579	26.9397	37.7588	YDR139C
chrIV	734122	734852		28.2246	27.1275	25.3137	27.1351	24.2275	28.8755	27.0898	24.7536	16.7481	16.7657	25.7058	30.6299	YDR140W
chrIV	734724	740099		16.5864	17.471	18.3351	18.8961	21.6488	19.5771	24.3006	21.9356	22.1244	20.4055	21.1712	20.2688	YDR141C
chrIV	740357	741746		20.0187	18.9113	22.5755	29.2904	23.3074	20.5877	26.4021	20.7169	21.4196	20.0182	19.64	21.1199	YDR142C
chrIV	741961	744045		31.4912	29.1937	25.1919	34.728	25.9069	32.2796	32.7827	34.6666	20.3321	16.9683	36.2359	35.9875	YDR143C
chrIV	744225	746261		41.6386	40.3979	24.5215	19.0816	19.6739	31.1387	12.6984	29.3833	14.5534	13.6087	33.9267	44.6644	YDR144C
chrIV	746648	748390		32.8648	32.6216	34.7483	29.2547	29.4227	27.2584	31.2206	28.7828	26.8004	30.5951	30.6726	39.6341	YDR145W
chrIV	748612	750911		31.566	26.5427	42.5693	36.5691	25.8002	18.2068	10.0843	17.4115	11.8841	29.5286	28.7702	31.6798	YDR146C
chrIV	751558	753400		17.7325	15.8333	19.1186	20.9473	15.5198	13.5814	15.2757	13.9441	9.70234	13.5755	17.2295	19.0846	YDR147W
chrIV	753395	755327		25.4201	26.4937	43.1071	43.6137	28.4782	17.0966	45.391	20.2203	38.2298	54.0818	16.6084	24.4164	YDR148C
chrIV	755558	763923		17.665	17.6605	20.0177	19.5663	14.4936	12.8984	16.546	14.4174	11.2444	20.4974	16.2894	21.6037	YDR150W
chrIV	763919	765317		62.9284	66.5341	75.3637	75.6028	46.1932	39.6996	65.6498	37.2217	122.85	143.23	33.8684	58.3191	YDR151C
chrIV	765628	766560		76.2633	71.9045	33.708	22.8926	30.6087	55.4666	31.8473	51.4183	42.3007	29.7477	60.7297	79.9734	YDR152W
chrIV	766611	768048		52.9045	54.1251	43.2469	52.2747	40.7893	50.421	53.9889	51.5567	39.9197	40.6294	58.7006	64.5853	YDR153C
chrIV	768402	769094		305.995	312.212	494.384	368.092	139.673	60.4208	247.962	84.1261	695.673	865.203	50.3843	288.027	YDR155C
chrIV	769467	770032	1_RiBi	137.669	120.261	57.0252	31.5275	44.7622	98.1677	22.0851	75.9811	64.308	46.7793	90.8548	126.133	YDR156W
chrIV	770316	771577		71.0137	68.9962	47.4572	93.3418	41.9321	63.3444	28.7453	61.5808	40.9533	49.7942	64.8591	88.8282	YDR158W
chrIV	771778	775841		17.3874	17.6841	16.4887	17.6955	17.495	18.1513	20.0262	19.7057	13.2414	15.2144	19.8154	20.1541	YDR159W
chrIV	775979	778772		13.9124	13.6395	14.6769	16.0754	19.6056	17.5479	20.4109	19.1205	21.5955	21.2381	15.5956	15.5331	YDR160W
chrIV	779000	780286		34.8717	30.9462	7.92746	4.23221	13.5761	35.5734	8.80881	30.1349	5.96642	3.45575	39.5053	36.6966	YDR161W
chrIV	780211	781230		28.65	28.6637	27.1558	37.3465	32.9171	34.8596	38.164	31.6533	20.8443	20.45	30.4126	28.7742	YDR162C
chrIV	781348	782055		31.6361	30.8425	32.794	51.5362	35.4368	36.2408	48.9136	32.7227	24.6622	26.5312	31.357	32.986	YDR163W
chrIV	781927	784265		16.3697	17.1264	15.7886	19.8723	17.8515	18.5557	18.0317	18.662	14.9488	15.0316	20.2945	19.4053	YDR164C
chrIV	784827	786295	1_RiBi	46.285	42.4984	8.57072	5.50654	15.4332	49.5615	4.7021	44.6281	12.4076	5.31281	59.3888	51.4273	YDR165W
chrIV	786194	789292		19.6355	19.366	18.5489	19.8419	19.7984	21.1834	14.8612	21.0816	16.2949	19.7312	23.4427	23.777	YDR166C
chrIV	789412	790170		46.5439	42.2186	41.5346	46.5582	39.1011	43.8025	45.5487	41.0213	28.4011	32.1231	41.8771	43.3934	YDR167W
chrIV	790286	791926		27.1115	26.6409	30.9448	40.8638	28.2441	26.6936	31.3815	26.0487	26.05	38.595	29.1282	29.1708	YDR168W
chrIV	792106	794253		18.7522	19.4641	26.7522	33.7401	23.7516	16.818	36.4543	19.8599	23.0773	30.5368	18.3423	21.4264	YDR169C
chrIV	795993	802438		22.6338	22.3372	25.231	33.517	21.4713	18.7881	30.0946	20.9756	15.9804	23.9205	22.5198	28.2939	YDR170C
chrIV	806533	807833	4_HSF1	23.3554	29.9265	211.246	89.2964	35.0195	7.6452	69.7261	11.9247	1242.98	1248.2	5.96449	17.8273	YDR171W
chrIV	808249	810558		91.4745	87.146	49.4524	37.4998	51.6301	91.7599	37.7655	93.3993	25.276	16.1399	112.616	102.617	YDR172W
chrIV	810494	811697		30.8176	29.4034	37.1336	40.7315	25.1064	20.5133	29.2009	23.7086	24.3382	43.0575	20.8981	31.6168	YDR173C
chrIV	812073	813022		194.024	186.183	114.647	93.238	128.044	172.663	73.2355	148.877	82.0756	111.639	150.401	167.343	YDR174W
chrIV	813072	814209		32.5923	30.3381	33.8146	35.5281	32.5392	31.0237	37.6531	33.0127	23.6493	33.0957	32.5762	33.481	YDR175C
chrIV	814402	816829		36.9846	37.1853	39.0109	37.4955	30.5001	28.6569	22.3663	28.3679	18.9793	29.2384	32.3449	40.2958	YDR176W
chrIV	816836	817588		35.4119	34.1223	38.1041	30.2779	22.8764	20.3967	28.3137	21.3763	24.2628	38.0344	21.5078	36.5966	YDR177W
chrIV	817827	818665		22.7117	25.3611	57.6744	53.8407	27.7928	9.69601	50.4631	12.4733	42.7662	87.7665	9.33428	21.8751	YDR178W
chrIV	818582	819229		12.3596	13.4332	13.3002	17.3771	7.99917	9.404	6.45495	7.96623	9.91127	13.3717	11.9087	15.157	YDR179C
chrIV	819330	820976		13.8425	14.4241	12.6572	17.8646	12.6176	13.763	11.2914	13.3986	6.88853	8.90057	15.0686	16.4746	YDR179W-A
chrIV	821150	825825		10.6561	11.18	9.218	8.38955	8.4808	10.6313	5.45409	10.4422	5.12373	5.13566	12.5336	12.9677	YDR180W
chrIV	825767	827383		20.8302	20.2696	20.8972	29.3099	22.7337	22.418	27.2399	21.1054	16.929	19.5894	22.0938	23.1978	YDR181C
chrIV	827527	829170		22.1412	22.7721	27.8519	34.1639	29.1943	19.9292	38.3117	22.334	25.4136	28.5767	19.24	23.7221	YDR182W
chrIV	829513	830324		24.883	24.6189	23.454	35.6267	26.9333	27.087	27.7786	23.969	19.5885	19.1399	21.8359	24.7359	YDR183W
chrIV	830388	831612		43.1318	40.9344	5.67391	2.99556	16.338	43.3932	9.95485	35.6454	18.0631	3.68638	46.2267	47.058	YDR184C
chrIV	831728	832585		42.5657	38.9745	24.0123	13.9583	21.0828	32.2986	14.2395	30.793	44.7647	25.9434	34.7907	41.148	YDR185C
chrIV	832735	835682		44.3351	42.2373	42.8287	55.6102	61.3768	65.0123	82.7584	69.113	63.8079	54.8848	71.4829	49.5832	YDR186C
chrIV	836371	838225		80.5439	73.2205	72.6939	60.7385	42.4256	53.6619	39.6244	59.296	29.8593	56.3014	59.1955	93.3577	YDR188W
chrIV	838326	840487		25.4582	24.2011	22.2387	22.085	19.7261	20.5032	21.2295	22.2013	15.6101	20.2309	21.6586	27.5566	YDR189W
chrIV	840500	842054		62.4279	56.2428	28.2004	21.2909	25.9266	47.5391	24.8882	49.2812	21.3294	13.8566	55.918	64.1034	YDR190C
chrIV	842291	843557		16.7672	17.2446	17.4789	21.1423	19.7861	18.4486	21.0797	19.2736	11.446	11.181	18.0396	15.3109	YDR191W
chrIV	843474	844938		15.5275	14.7362	14.8569	14.1099	14.5446	17.2847	19.2272	17.2954	12.6185	9.56448	17.1342	17.7627	YDR192C
chrIV	845796	847978		42.513	42.8828	34.4273	38.8411	43.6474	50.7933	41.3185	52.67	40.4902	41.9753	50.3093	51.2419	YDR194C
chrIV	848358	850275		22.7517	22.2535	17.5932	31.8036	27.6033	32.0932	29.6917	28.4457	26.8235	22.4492	24.8829	22.2629	YDR195W
chrIV	850189	850999		24.1307	22.6267	31.1914	32.6113	30.2287	25.26	30.3483	28.2102	38.0569	41.8888	19.9669	21.7141	YDR196C
chrIV	851193	852527		17.6002	19.043	17.8202	17.734	21.9438	24.6656	22.167	27.2065	27.49	21.6685	20.6546	18.7545	YDR197W
chrIV	852490	854024		18.5224	17.4381	9.65702	14.2131	22.3523	32.5597	21.1166	30.7308	14.4284	5.62123	30.9131	20.7038	YDR198C
chrIV	854145	856170		15.3902	14.2416	19.3306	22.7946	17.9088	14.7179	19.2728	14.8731	15.9808	20.4601	13.4415	15.7289	YDR200C
chrIV	856268	856964		20.7543	20.4882	28.3308	33.5703	24.7718	18.1059	25.2084	17.3475	22.8886	27.795	14.9339	20.5532	YDR201W
chrIV	856864	857982		15.2186	15.9025	27.4323	32.5618	29.5806	16.628	36.9337	20.4255	46.6317	46.425	15.9551	15.1927	YDR202C
chrIV	858095	859251		17.6555	18.3301	33.674	38.9324	27.9764	17.1961	42.3318	20.2487	42.5953	41.0917	13.7186	15.463	YDR204W
chrIV	859312	861617		17.7138	17.7151	18.0991	23.483	21.3465	19.7778	22.4749	20.7245	14.1989	15.2608	18.0612	18.0299	YDR205W
chrIV	861705	864938		23.3308	21.0767	15.0076	16.1444	19.1719	25.5308	15.6878	27.8309	18.5302	13.1779	28.4086	28.4521	YDR206W
chrIV	864816	867588		15.5919	16.245	19.8009	14.5713	14.6755	14.3398	15.5684	15.5098	8.66148	12.754	16.3749	18.5662	YDR207C
chrIV	868053	870698		40.9051	39.6632	46.7527	51.1839	46.2724	43.0078	54.1918	45.3139	38.7103	50.6907	47.4084	49.8185	YDR208W
chrIV	871040	871484		99.8737	95.2592	78.3274	92.5891	95.0218	105.125	119.818	74.7359	89.5356	135.457	79.9221	104.592	YDR210W
chrIV	884646	887020	1_RiBi	34.7467	33.2366	16.0665	17.135	28.6809	45.9454	30.4523	45.6835	21.1694	9.47282	46.5487	41.2394	YDR211W
chrIV	887146	888998		41.4312	38.2892	30.3856	28.481	25.5906	35.4283	16.5567	35.9991	22.6684	25.3082	39.7027	49.8606	YDR212W
chrIV	889530	892732		35.0775	34.1551	39.5128	29.236	21.2859	21.0047	24.5669	20.6607	56.631	66.743	22.9047	33.2785	YDR213W
chrIV	892732	894023	4_HSF1	49.1469	49.5595	70.3956	32.3192	19.2206	13.848	30.4486	15.1846	299.467	429.163	14.3142	60.4697	YDR214W
chrIV	894508	899220		7.75393	8.68606	11.4877	7.70237	5.01841	4.61809	5.91106	4.61767	24.925	42.5232	5.40031	9.47123	YDR216W
chrIV	899281	903535		14.6431	14.1446	11.439	12.6963	12.052	14.7453	8.42973	13.4763	9.56102	12.7469	19.6999	17.9851	YDR217C
chrIV	905038	907097		21.2486	22.8875	32.3975	33.7958	22.7153	16.0394	21.2178	16.7477	19.5313	34.7802	19.9757	26.8842	YDR219C
chrIV	907299	909683		31.5245	32.3206	34.3844	32.226	23.0176	21.1091	23.3839	20.5511	17.7731	27.9843	22.2115	33.9228	YDR221W
chrIV	914198	914744		498.688	529.002	545.223	545.75	581.725	556.795	283.622	384.906	380.71	301.319	484.488	472.703	YDR224C
chrIV	915406	916088		475.069	503.76	516.342	507.629	607.683	572.169	354.18	437.923	486.82	325.567	514.782	439.667	YDR225W
chrIV	916415	917282		100.839	97.6363	85.7163	78.8245	73.3597	77.3913	75.9858	72.1831	52.3032	54.9972	76.3825	96.3995	YDR226W
chrIV	917444	921839		14.9728	14.7873	12.5571	14.5239	13.2308	15.7316	12.5642	16.7483	6.65913	10.9719	20.262	19.6106	YDR227W
chrIV	921852	923894		26.6594	26.6191	24.6507	21.5832	23.9082	24.9857	15.251	25.6626	22.4918	23.1845	29.8639	29.5675	YDR228C
chrIV	924682	926201		25.3001	24.0402	31.877	33.0883	28.8108	18.938	30.5785	23.0503	31.2449	46.8396	22.3343	27.1299	YDR229W
chrIV	926136	926940		29.7717	31.3734	65.0353	53.5921	35.6894	18.6026	46.0342	20.366	37.0462	82.8206	17.8521	27.9591	YDR231C
chrIV	927190	929274		45.2568	41.7244	39.1449	25.7062	38.161	46.0174	42.4573	47.6821	35.6809	45.0911	51.2777	49.824	YDR232W
chrIV	929321	930427		145.508	149.306	115.951	87.4913	122.803	151.907	53.6414	133.281	120.753	94.5781	155.071	147.751	YDR233C
chrIV	930923	933320		40.0693	36.4831	16.4666	11.0435	23.2036	40.9536	17.2784	38.0141	18.2327	6.36879	44.0483	40.7526	YDR234W
chrIV	933471	935221		20.1112	20.0737	18.5742	20.5132	20.7313	23.6073	16.0356	22.2349	17.0371	17.31	23.8518	22.7256	YDR235W
chrIV	935139	935915		22.4843	21.708	26.3127	44.8759	25.4108	24.1368	28.731	25.0938	23.9749	25.0313	25.3836	25.7123	YDR236C
chrIV	936471	937612		26.8524	25.7942	27.331	31.1411	28.3929	29.1088	29.5188	26.0933	23.3536	24.4674	29.1441	27.6374	YDR237W
chrIV	937616	940874		40.4814	38.9392	40.58	36.6334	37.1606	37.0723	28.6636	40.4737	28.2459	37.835	41.9923	50.7086	YDR238C
chrIV	940978	943443		16.5406	15.7303	14.0745	15.634	15.7143	17.5171	14.8386	17.306	10.826	7.90123	18.0822	16.3798	YDR239C
chrIV	943614	945170		20.0556	19.9599	13.9745	12.5368	18.4887	21.5816	13.4744	20.4009	12.2665	7.21331	21.993	21.2062	YDR240C
chrIV	946698	948597		13.348	14.2024	26.9445	163.145	55.6929	20.716	108.658	24.1204	19.6662	12.211	18.7367	15.4225	YDR242W
chrIV	948499	950314		16.821	15.6449	14.0511	19.6129	20.5986	21.6206	21.6538	21.2765	16.7372	11.9093	22.7819	19.4188	YDR243C
chrIV	950536	952595		18.227	17.9502	21.7233	26.721	26.6152	21.0134	30.0957	20.066	29.7346	26.097	18.4321	18.8088	YDR244W
chrIV	952714	954131		54.1525	49.901	44.2465	44.5994	40.1821	47.8302	46.7571	49.7712	32.3513	34.7319	53.0667	60.2433	YDR245W
chrIV	954251	955097		42.0804	45.059	56.1206	48.6764	41.3939	39.0618	33.934	36.1286	66.5516	114.588	32.7675	40.9642	YDR246W
chrIV	955709	957788		15.0179	15.2114	31.6006	35.502	27.7068	15.6917	43.4993	18.2554	56.1817	99.6024	14.9853	18.2197	YDR247W
chrIV	957654	958436		12.573	15.8514	26.8013	53.9869	33.0187	23.0514	53.9317	27.654	96.5985	91.8846	16.0684	13.5446	YDR248C
chrIV	958563	959858		21.0124	20.9316	20.3211	24.1919	28.279	30.5022	31.198	29.6873	28.7004	26.0866	24.2659	22.5199	YDR249C
chrIV	960303	963307		21.8583	23.4853	38.5841	36.9633	35.0939	21.6307	41.6189	26.9283	40.375	50.4069	19.1687	23.3202	YDR251W
chrIV	963402	964451		19.4415	19.3791	21.6739	19.9102	21.3426	20.4477	20.1422	22.1649	21.8109	17.7134	15.4941	20.3065	YDR252W
chrIV	965024	967001		13.1793	14.3531	23.0004	24.4759	17.3515	9.49829	22.2549	12.4153	22.1749	29.1905	8.94678	15.477	YDR254W
chrIV	966328	967865		16.6849	18.7283	35.3926	46.7552	26.9093	11.0862	40.2488	13.9229	36.0133	45.529	9.89371	17.8365	YDR255C
chrIV	969672	971476		29.3946	29.4856	22.3119	24.0887	21.7716	27.4688	22.6459	28.451	18.6303	12.1907	26.5754	35.0026	YDR257C
chrIV	971698	974275	4_HSF1	24.2038	28.0205	90.1054	54.308	20.7849	9.82173	37.7794	14.7823	946.122	1097.53	6.3867	24.9721	YDR258C
chrIV	974486	975986		18.7994	20.9173	27.3617	24.5426	22.0274	18.337	33.2143	27.6903	270.48	379.639	18.2958	19.8415	YDR259C
chrIV	976373	977287		56.3365	53.8839	67.1049	83.7642	59.0407	55.1718	79.3085	60.2548	51.2082	48.1655	44.7685	51.0646	YDR260C
chrIV	977398	979308		32.7858	33.146	38.365	61.8162	45.7131	40.3811	83.3818	46.8789	34.6035	28.2051	30.6972	31.9289	YDR261C
chrIV	995765	998427		28.639	28.1436	32.0328	46.3559	33.4945	29.4318	65.1001	31.2069	26.9014	30.2565	29.8519	29.2119	YDR264C
chrIV	998641	1000056		21.0067	22.4849	26.6153	41.1385	22.9529	18.6798	40.2257	20.2147	35.679	33.8502	19.8064	21.9385	YDR265W
chrIV	999980	1002237		30.4226	27.6273	20.97	19.5925	31.339	40.7231	35.2082	43.2941	36.4674	26.5702	46.2411	34.2908	YDR266C
chrIV	1002315	1003571		28.0449	29.5427	23.4648	25.2005	28.126	36.5917	37.8356	33.4102	15.2717	12.9685	40.2925	34.0109	YDR267C
chrIV	1003929	1005246		47.795	43.7406	37.4348	33.9691	32.3751	44.9773	30.6155	37.3165	17.7332	18.4022	40.7342	40.9093	YDR268W
chrIV	1005571	1008750		23.3235	22.684	25.683	29.9767	33.4283	31.3259	59.7372	30.8606	27.27	25.5605	27.1806	22.7323	YDR270W
chrIV	1008924	1009887		29.402	29.8086	41.0377	45.7859	37.6099	28.5916	48.9221	29.121	51.8429	64.9541	31.3631	30.2316	YDR272W
chrIV	1012120	1013363		48.8044	52.2393	74.6737	68.2683	54.7801	47.1868	41.5401	45.4389	80.0071	81.3364	60.4137	58.8905	YDR275W
chrIV	1013252	1013716		168.513	170.097	326.734	239.258	207.249	125.288	136.311	108.16	269.116	387.695	105.42	158.388	YDR276C
chrIV	1014207	1015858		28.7531	31.4489	74.0432	20.5935	10.6233	7.8378	23.5474	9.54986	28.0311	92.306	9.62008	22.367	YDR277C
chrIV	1019288	1020502		27.0419	27.8095	21.8654	25.6612	17.6821	20.0837	22.465	19.1721	9.98013	13.9526	23.7165	27.2158	YDR279W
chrIV	1020604	1021772		54.3788	52.945	32.8984	29.3077	30.3213	47.7162	26.0327	48.1542	22.2445	25.9399	57.0333	59.5303	YDR280W
chrIV	1021802	1022426		17.8329	18.5113	15.1366	16.9404	19.7336	20.485	20.7011	17.9436	12.4764	6.32125	26.4449	20.0833	YDR281C
chrIV	1023168	1024760		10.2863	10.451	12.368	21.9177	14.9291	10.551	25.2584	12.5138	13.5586	15.5965	11.9506	10.2017	YDR282C
chrIV	1024910	1030275		14.3243	14.506	14.9735	17.8411	21.2996	20.4879	20.0888	22.7606	14.5581	12.8522	22.2937	18.035	YDR283C
chrIV	1030461	1031706		32.4883	30.6402	46.0266	85.4421	60.2067	42.5886	84.0523	41.6363	36.9989	44.6489	37.8513	30.3034	YDR284C
chrIV	1035951	1036959		13.7144	15.5318	22.2326	33.466	22.4161	16.2028	38.7449	17.1075	25.3228	26.9	15.4998	14.2454	YDR287W
chrIV	1037139	1038270		21.1138	20.7747	23.0453	24.0267	22.2175	21.6831	19.957	21.4516	25.8132	21.4082	20.0971	20.1406	YDR288W
chrIV	1038095	1039578		23.0377	23.1236	19.1682	19.895	26.6448	29.4109	22.8119	29.2402	22.4933	20.49	30.5941	26.3332	YDR289C
chrIV	1039727	1043176		13.7078	13.2925	11.9904	11.8136	15.0144	17.1735	13.8859	18.2206	12.7696	11.912	18.0378	15.5633	YDR291W
chrIV	1043088	1045172		25.3236	25.4032	23.3304	26.2863	26.8308	27.7924	23.6995	28.394	18.2484	16.0757	32.5468	28.7992	YDR292C
chrIV	1045396	1049517		30.289	29.9613	43.9721	55.8143	74.8754	54.9576	125.808	68.2523	63.5406	72.2565	45.9131	37.1488	YDR293C
chrIV	1050406	1052304		26.8394	25.1654	29.9076	30.7819	50.5956	43.3981	66.7624	49.197	55.3583	33.3838	39.0393	28.232	YDR294C
chrIV	1052536	1054908		13.0034	13.129	12.9962	16.0597	18.3636	20.8734	18.4725	20.6948	23.4671	17.9165	20.2628	14.6849	YDR295C
chrIV	1055157	1055967		53.994	51.8522	60.8232	62.7641	54.2689	46.9459	76.9051	45.247	46.6279	51.8827	43.2411	49.4007	YDR296W
chrIV	1056431	1057764		37.2893	36.4803	36.6755	25.6063	32.8191	33.7925	50.13	34.6252	41.4312	15.393	29.2586	33.5035	YDR297W
chrIV	1057997	1058992		55.7001	60.6776	69.514	78.1715	37.9697	29.1606	43.7489	27.3692	23.6359	52.7485	34.1011	59.689	YDR298C
chrIV	1059565	1061489	1_RiBi	53.8718	50.4245	6.34457	1.83195	12.6585	50.3303	3.99108	44.5684	4.39401	1.68435	68.0466	66.5525	YDR299W
chrIV	1061412	1062873		39.9551	38.327	15.8076	9.43669	21.3448	37.6295	12.6005	35.6697	9.71428	5.96108	43.9429	45.427	YDR300C
chrIV	1063275	1067475		17.0187	17.3426	18.4942	20.1044	21.9233	18.6066	23.713	22.4078	17.123	20.4059	21.2603	20.6394	YDR301W
chrIV	1067658	1068470		23.2536	24.7024	22.4048	23.0899	16.683	20.9001	15.7354	17.9724	15.5702	21.4592	19.3558	26.9195	YDR302W
chrIV	1068619	1071701		24.8822	24.1088	25.894	28.0838	23.4797	20.7083	22.3538	21.9571	14.5237	26.6618	24.4344	28.8336	YDR303C
chrIV	1071808	1072611		48.6238	48.8185	65.7172	74.4268	52.9907	39.0746	72.4406	44.4968	57.1464	68.8008	40.0434	47.5226	YDR304C
chrIV	1073659	1075227		15.631	17.5005	22.8173	23.7428	19.8156	16.9342	19.9417	16.7488	13.9207	26.1798	16.3427	18.3042	YDR306C
chrIV	1075804	1078005		13.3411	14.9119	16.8004	21.8593	16.0681	12.3836	18.8585	13.5606	18.6296	20.0895	13.2695	16.2534	YDR307W
chrIV	1077867	1078488		31.1827	33.3518	33.5621	48.6459	38.4013	34.4996	31.7416	33.7467	32.5417	26.2915	34.4365	34.3477	YDR308C
chrIV	1078682	1080247		79.4152	80.0614	102.693	118.093	116.435	95.4743	109.507	92.4498	54.8971	45.3487	86.3563	75.6914	YDR309C
chrIV	1080920	1084518		29.7041	30.3869	27.3029	24.7966	23.8522	26.0484	22.9799	31.1466	22.27	20.8481	33.9172	38.6483	YDR310C
chrIV	1085055	1087094		23.8535	24.0209	22.3917	25.0128	33.1599	33.3866	32.095	34.8838	26.6022	18.4106	34.0299	28.4438	YDR311W
chrIV	1087530	1089078	1_RiBi	31.8418	28.4113	8.47681	11.9124	13.7147	30.4999	14.5008	28.8236	6.66657	3.73639	39.6895	37.5289	YDR312W
chrIV	1089017	1090111		21.8337	22.8328	29.0183	30.6636	27.6124	22.0457	36.2248	24.195	49.7427	64.3134	20.9485	25.0903	YDR313C
chrIV	1092674	1093631		24.5698	25.4607	33.7697	59.2666	28.6875	23.1188	32.581	20.9886	18.7424	23.6084	17.7694	22.6016	YDR315C
chrIV	1093734	1095250		21.6439	22.2003	24.9763	38.0137	29.4242	27.6455	61.4186	30.4381	25.5963	22.1121	27.0696	25.0702	YDR316W
chrIV	1103740	1105073		22.0199	22.1531	27.2305	32.9527	25.5004	22.0322	30.8409	24.948	22.1615	23.1818	21.2124	25.9191	YDR318W
chrIV	1104926	1105904		26.9154	25.3971	33.7574	41.3766	37.7734	26.9487	36.0767	27.9002	36.3584	33.0348	24.9891	29.3491	YDR319C
chrIV	1106017	1108126		22.5157	21.9154	21.6497	25.4044	22.2931	20.5422	32.8715	22.105	20.5859	28.1135	20.8232	25.2114	YDR320C
chrIV	1108199	1108519		78.9526	70.0186	66.5637	58.8312	34.9259	39.1268	20.8585	33.4131	29.5469	44.2487	29.2715	60.4691	YDR320C-A
chrIV	1108659	1109936		36.844	32.6649	11.6145	6.18168	14.3564	30.4802	8.04173	28.5467	11.8617	4.54329	34.3664	41.3593	YDR321W
chrIV	1110561	1111787		27.6841	28.0465	28.5317	32.2327	26.3106	24.3031	27.3952	23.8755	23.5961	26.8213	24.3759	29.6908	YDR322W
chrIV	1111794	1112340		54.777	64.8355	76.753	94.9343	61.1358	39.6607	89.7793	39.7663	58.3032	79.0809	33.7999	56.0854	YDR322C-A
chrIV	1112279	1114053		22.1669	25.4569	29.9599	38.636	25.5273	19.4455	35.2071	18.7135	21.7618	24.1946	17.1782	20.8157	YDR323C
chrIV	1114250	1116763	1_RiBi	42.0713	38.772	6.62014	3.70506	14.2711	47.1841	5.90417	41.9839	11.9153	1.9505	56.0828	49.3775	YDR324C
chrIV	1117115	1120309		16.2261	15.8074	12.5527	12.0863	13.0472	16.4882	8.74256	18.3406	11.372	12.3201	20.174	20.1334	YDR325W
chrIV	1120512	1125124		19.0687	18.3566	17.3997	18.6752	29.3933	31.0138	31.668	36.3958	24.0488	16.443	30.9958	24.5227	YDR326C
chrIV	1125239	1126094		39.9736	39.9078	54.9462	61.5646	54.2771	43.6841	81.1966	44.178	44.6678	46.1281	36.2908	40.4187	YDR328C
chrIV	1126034	1127622		22.8657	22.4212	31.7261	32.9371	24.9333	19.1554	33.9873	21.6608	26.0735	34.4448	17.6677	22.4435	YDR329C
chrIV	1127792	1129454		15.8298	17.1523	29.4725	32.6382	23.3954	15.8213	33.319	19.3378	30.6694	41.5589	15.1513	18.0227	YDR330W
chrIV	1129468	1130898		32.765	34.247	31.0516	31.2182	31.1044	34.1018	22.6498	31.6148	30.7633	27.0197	35.4165	37.7105	YDR331W
chrIV	1130974	1133170		14.3987	14.4652	15.7829	17.5795	21.1949	19.0855	16.3639	20.1607	22.8936	17.7	19.3833	16.5791	YDR332W
chrIV	1133042	1135466		23.9205	24.3018	22.1272	17.7057	21.5222	24.5808	14.9323	24.9584	21.4547	20.7052	26.5014	29.2206	YDR333C
chrIV	1135766	1140570		28.9624	30.5303	31.633	29.9376	23.7211	22.5741	26.6814	26.2267	30.507	35.216	25.4412	38.9673	YDR334W
chrIV	1140795	1144933		24.6672	24.5105	32.8497	32.021	24.2377	21.3172	22.4764	22.9472	24.6074	37.6787	24.2386	30.1253	YDR335W
chrIV	1145067	1146145		43.8044	44.8522	44.0146	54.2998	40.8414	40.0474	33.6928	36.2082	31.5746	30.4067	38.1067	37.8904	YDR336W
chrIV	1146254	1147230		34.661	37.2197	40.1889	52.7808	35.2684	28.7761	38.1753	26.8767	29.5741	32.2576	28.9334	35.8867	YDR337W
chrIV	1147242	1149523		15.8186	16.1856	17.5708	20.3058	20.0577	18.5993	26.5557	22.1378	21.3545	22.0236	22.677	19.9864	YDR338C
chrIV	1149843	1150558		66.6372	63.8096	40.2236	26.7224	37.2561	67.5616	34.1508	55.2345	30.3324	24.6679	62.7716	70.9263	YDR339C
chrIV	1151636	1153716	1_RiBi	47.9817	46.7419	19.2693	24.038	23.8987	51.3197	12.7059	48.6141	22.3185	11.5479	63.5608	58.5521	YDR341C
chrIV	1154071	1156017		41.2691	50.7177	109.281	19.272	9.25313	7.61939	11.5109	9.2663	89.0522	443.797	10.668	34.0036	YDR342C
chrIV	1159563	1161402		40.6935	49.2456	105.949	18.8525	9.45802	7.0077	12.0065	9.09543	85.6529	418.879	10.0802	33.8331	YDR343C
chrIV	1162810	1164690		121.123	118.867	235.337	50.2692	30.5792	14.2953	33.5603	22.8017	62.7133	160.593	26.9689	125.948	YDR345C
chrIV	1166935	1168880		45.7697	44.7924	33.7658	40.0321	33.4722	41.7599	36.4618	40.1435	38.45	35.0985	48.7242	54.9806	YDR346C
chrIV	1169059	1170260		41.1314	39.5275	39.2863	47.0569	36.167	33.5972	38.859	34.8508	28.0844	36.3698	33.7604	37.3937	YDR347W
chrIV	1170126	1171963		30.809	30.7802	29.7833	34.9201	24.8559	23.7626	33.2946	26.1585	17.6408	28.3882	33.0206	38.4523	YDR348C
chrIV	1172262	1174283		30.6344	29.7656	26.3975	36.3465	28.7832	32.755	38.8446	31.6986	16.0968	23.9247	35.2025	34.6529	YDR349C
chrIV	1176048	1178200		18.6531	19.3381	23.1376	35.874	35.5123	33.7386	48.9912	36.046	28.5124	25.7032	31.6697	21.2702	YDR350C
chrIV	1178443	1181404		25.4611	26.1909	21.4996	36.0365	48.2674	50.3373	50.7644	53.0825	22.7618	18.0727	44.2568	29.7818	YDR351W
chrIV	1181621	1182987		41.5527	40.1137	49.2402	67.1209	39.4436	33.5389	41.0367	32.578	32.8777	35.1305	36.0296	38.8552	YDR352W
chrIV	1183205	1184325		111.116	112.222	138.856	155.206	95.6933	87.3574	70.1667	73.2493	67.2409	95.4538	78.0112	89.1166	YDR353W
chrIV	1184619	1185948		29.8109	30.7948	36.8673	78.369	26.2019	25.397	26.8463	25.0564	13.4435	20.3628	27.9826	33.2353	YDR354W
chrIV	1185993	1189181		19.5909	20.5731	23.4153	24.7657	14.7347	12.8285	13.3076	12.751	10.517	20.4185	17.7198	24.7634	YDR356W
chrIV	1189100	1189736		31.3231	35.6648	47.6499	58.0852	31.5799	25.6995	26.3149	21.2535	33.8433	42.0185	20.0645	29.1676	YDR357C
chrIV	1190005	1191894		11.9429	12.5572	29.9362	35.0927	24.4202	12.4507	38.2696	16.1032	57.3911	59.5728	10.6656	11.8949	YDR358W
chrIV	1191859	1195197		27.03	25.272	22.8162	18.7687	30.0994	35.6963	21.1258	41.0791	27.4345	15.5599	39.1104	29.9499	YDR359C
chrIV	1195158	1196308		53.8432	48.854	24.9379	23.1544	22.0067	46.5029	15.2669	38.0602	11.1144	10.7794	50.095	52.5115	YDR361C
chrIV	1196625	1198805		16.0181	15.0338	15.6398	20.1481	15.3527	16.6507	17.9335	17.9569	11.3433	16.2871	16.068	17.6879	YDR362C
chrIV	1199001	1201510		14.2172	14.8623	13.0863	14.937	21.9483	24.8206	22.5244	24.924	15.654	13.1455	20.8364	15.9645	YDR363W
chrIV	1202087	1202545		66.0804	66.6615	79.6602	99.8484	36.1904	29.4969	26.9528	28.3005	28.1215	69.7056	27.3462	72.1029	YDR363W-A
chrIV	1202493	1204231		28.2267	26.2271	18.3687	16.1684	19.4473	29.0483	16.0841	26.3851	19.5155	15.1469	27.2128	30.4497	YDR364C
chrIV	1204402	1206467		40.6832	36.4071	6.48704	3.64969	15.6836	44.5242	6.20135	41.9311	11.0584	2.33637	53.8958	50.5086	YDR365C
chrIV	1212790	1213650		29.8226	27.5283	19.4425	10.6317	21.6489	33.4956	7.42597	28.3968	17.4991	14.1394	31.2813	30.3733	YDR367W
chrIV	1213817	1215005		17.9479	17.6964	27.9716	28.1316	21.4322	18.3671	29.6809	23.5207	25.5521	34.41	17.0923	19.9802	YDR368W
chrIV	1214946	1217601		10.2122	10.8353	10.822	14.9436	16.0167	15.6276	15.1798	16.056	9.89669	10.9984	12.8188	10.2973	YDR369C
chrIV	1217725	1219122		30.2252	30.0661	23.2508	20.6917	21.996	29.3075	17.4652	28.3154	12.8705	11.5317	27.4831	29.8738	YDR370C
chrIV	1219333	1221046		14.0389	14.1873	18.8617	27.9619	21.0299	16.5296	25.081	17.9469	18.3949	18.807	13.0069	13.6198	YDR371W
chrIV	1220967	1222463		39.3959	40.5956	38.4469	45.1468	46.3595	45.165	62.2103	43.2526	28.4971	29.1523	38.7329	38.0501	YDR372C
chrIV	1222644	1223411		32.5657	31.9974	38.7414	54.888	43.2357	36.8812	93.7659	30.6317	31.4168	32.0926	26.4329	30.1885	YDR373W
chrIV	1224728	1225254		20.8533	21.3424	32.3485	38.3874	28.3262	20.4832	38.4193	20.6344	19.6613	36.1374	18.3998	21.2202	YDR374W-A
chrIV	1225105	1226555		19.0728	20.0934	23.0485	28.4172	21.5147	19.2899	33.3425	19.4566	20.3048	22.8597	17.7234	20.7131	YDR375C
chrIV	1226757	1228339		17.5066	19.2086	26.9382	34.2351	22.0923	18.2629	34.3058	18.7045	27.2746	44.4805	15.3713	18.3739	YDR376W
chrIV	1228514	1229320		73.8788	80.2162	97.5719	92.9481	65.9077	45.0145	51.1335	40.3034	58.803	123.001	47.7152	78.8022	YDR377W
chrIV	1229138	1229625		53.0658	53.3495	56.9378	55.8767	55.1093	47.0499	38.1921	43.5416	35.7678	46.764	42.1588	52.0945	YDR378C
chrIV	1230100	1233201		17.1501	16.9015	25.7612	40.8919	30.4342	22.6065	41.2155	25.7679	21.6036	24.8737	23.2762	17.4776	YDR379W
chrIV	1233110	1233751		16.7169	20.9	44.0348	107.106	48.2285	33.9781	56.8836	27.2282	72.5477	117.071	36.4512	18.4659	YDR379C-A
chrIV	1234097	1236250		34.8337	35.8453	47.4251	172.179	105.323	101.636	100.99	71.5982	72.4908	242.198	154.597	48.2381	YDR380W
chrIV	1236459	1238196		225.566	225.255	251.131	204.712	258.154	226.946	255.966	218.274	257.603	292.492	206.263	256.697	YDR381W
chrIV	1238182	1239120		30.4001	30.0944	37.3307	43.5175	48.8637	44.524	35.2577	43.1885	51.8361	41.4102	34.7061	30.4044	YDR381C-A
chrIV	1239409	1239970	2_RPG	345.094	310.053	86.0383	14.6987	257.177	435.769	22.6215	350.08	148.625	8.49403	380.397	343.078	YDR382W
chrIV	1239879	1240701		66.7581	64.7389	45.4306	30.1038	60.5727	72.0833	28.8858	70.072	40.3329	16.9031	74.2579	71.3692	YDR383C
chrIV	1241041	1242174		53.6347	49.0601	24.9289	9.03891	21.2149	48.7906	9.62903	36.779	24.2527	13.9592	62.2037	55.7231	YDR384C
chrIV	1243121	1245910	1_RiBi	217.064	201.527	89.3315	39.8685	169.76	270.163	71.5412	283.545	131.666	29.5718	297.867	248.224	YDR385W
chrIV	1246071	1248125		12.057	11.9909	15.3601	23.2727	13.7361	11.1965	19.64	12.494	8.27546	12.5317	12.9208	13.7257	YDR386W
chrIV	1248046	1249965		17.2793	17.4633	27.6663	34.0407	25.4974	18.1646	39.3527	19.8199	26.1753	30.1407	17.5724	16.2762	YDR387C
chrIV	1250133	1251756		31.9555	28.3945	50.228	55.1134	45.3664	26.9451	61.6282	32.6987	47.1773	57.6816	28.2534	30.3236	YDR388W
chrIV	1252013	1254816		30.8967	29.0763	35.2525	36.2897	32.2619	28.6034	42.4828	29.8877	15.8824	28.0631	31.4032	34.5426	YDR389W
chrIV	1254783	1256874		21.2233	20.3041	16.5205	14.8317	16.1942	18.4915	13.2896	18.391	10.6833	12.8417	18.4356	22.0546	YDR390C
chrIV	1257237	1258480	3_MSN2	18.132	20.1497	47.4456	92.0328	42.5288	20.7475	60.2688	21.9798	43.081	47.1224	17.3043	16.2957	YDR391C
chrIV	1259830	1261449		38.1401	37.7803	41.3943	49.0671	34.1413	29.9387	36.3074	30.4319	23.4432	28.7883	31.7775	40.2269	YDR393W
chrIV	1261575	1263054		54.3582	54.7189	62.5071	63.8746	27.81	24.1721	39.7383	28.475	22.9422	58.8803	26.9495	63.8562	YDR394W
chrIV	1263188	1266247		41.1954	37.9639	14.6608	11.215	21.9959	47.0002	18.0314	46.2748	13.6101	6.21862	59.3534	50.476	YDR395W
chrIV	1266265	1266986		54.6163	51.7694	35.759	31.4758	34.3924	46.404	45.433	36.4861	27.978	24.6937	43.5426	49.3363	YDR397C
chrIV	1267394	1269521	1_RiBi	53.9501	48.3086	9.14202	8.3586	16.1574	49.945	16.2366	45.7096	10.3024	3.74423	64.4674	65.1167	YDR398W
chrIV	1269976	1270846	1_RiBi	133.242	124.029	59.6386	86.4946	56.5282	106.168	57.8336	89.3502	115.12	33.3545	106.817	150.219	YDR399W
chrIV	1270985	1272235		22.6842	22.7943	22.0735	28.2957	18.0373	18.1699	24.5462	19.0232	16.6318	14.8588	18.3092	22.9859	YDR400W
chrIV	1272198	1273744		6.36085	6.56334	6.52362	8.1699	8.44678	9.11657	10.8364	9.71056	10.0793	7.28834	7.14031	6.29048	YDR402C
chrIV	1274558	1276243		6.09999	6.07074	6.03061	11.6803	12.4483	14.5848	17.7195	14.2089	15.5666	8.71414	10.6519	6.15728	YDR403W
chrIV	1276509	1277374		49.6142	46.31	48.5625	44.5352	44.1206	44.4974	57.3219	41.9703	40.0749	42.9643	38.1432	47.2379	YDR404C
chrIV	1277570	1278573		49.9947	48.6397	65.5774	87.8116	67.3939	51.459	195.605	63.3776	56.6131	74.9242	47.1191	50.0507	YDR405W
chrIV	1279078	1283925		11.8366	12.3072	17.8534	21.6075	16.6361	12.5616	31.3259	18.6302	24.3227	38.4835	12.7965	11.8777	YDR406W
chrIV	1283997	1288042		16.6778	17.7235	19.6156	20.4811	16.4486	14.4373	19.4553	16.7625	11.0857	18.6291	15.7576	20.6541	YDR407C
chrIV	1288042	1288942		65.8596	62.4344	74.8791	81.8022	71.2196	63.7797	147.043	62.4987	51.7419	54.3178	53.3203	62.3182	YDR408C
chrIV	1289365	1292361		20.9419	20.6089	21.9767	23.4895	25.4403	23.1425	34.4219	25.7048	22.7144	26.5016	24.7886	23.0709	YDR409W
chrIV	1292346	1293159		51.0372	47.1535	46.2425	54.0741	52.7244	53.3604	60.3058	47.9193	40.1018	29.9442	43.919	46.6885	YDR410C
chrIV	1293303	1294442		25.9356	27.167	32.9185	41.4578	27.8117	20.304	44.4497	21.6979	21.9523	34.2136	16.7098	25.0286	YDR411C
chrIV	1294624	1295542		46.8805	44.0245	13.8423	12.4959	22.1831	36.9969	17.3502	32.4054	11.8766	5.52608	40.6044	48.9175	YDR412W
chrIV	1295416	1296912		19.5256	17.9449	16.6103	21.3799	16.8334	18.9502	15.6176	17.4734	12.3908	12.04	20.0067	20.305	YDR414C
chrIV	1296956	1298214		30.2724	29.3678	32.1775	42.875	34.4609	33.2728	41.6004	31.6656	27.0973	26.9488	32.1875	30.3867	YDR415C
chrIV	1298367	1301044		45.6896	42.7138	25.2608	18.5244	49.4266	60.53	20.2717	51.5144	30.8704	15.0176	58.8419	43.4317	YDR416W
chrIV	1301580	1302214	2_RPG	457.24	433.614	162.319	55.7905	430.941	527.987	89.1247	469.406	254.986	25.304	524.845	443.722	YDR418W
chrIV	1303123	1305434		13.5883	13.1942	13.7343	20.5403	19.2159	17.4268	27.4033	17.7768	11.2394	8.06051	16.9811	12.1645	YDR419W
chrIV	1305984	1311813		25.7547	26.5742	22.6852	32.8559	44.1555	47.1407	55.0226	52.0309	20.6762	13.4299	45.5067	32.0683	YDR420W
chrIV	1311962	1315147		13.3542	12.4576	17.222	30.5539	24.7791	19.6144	42.8201	20.7563	18.9873	17.3913	18.5522	12.9576	YDR421W
chrIV	1315033	1317827		22.5201	21.7427	22.0727	20.2227	26.4281	26.7417	31.3578	29.3973	21.9491	24.2033	28.6805	24.6124	YDR422C
chrIV	1317975	1319275		38.0016	37.664	49.6322	62.9278	44.1985	34.4952	69.7841	34.6753	35.8133	46.5074	31.1186	35.8651	YDR423C
chrIV	1319357	1319896		85.5151	86.5289	107.917	153.174	82.0743	60.9728	83.3036	47.9742	54.0457	77.0692	46.8452	71.6945	YDR424C
chrIV	1320012	1322025		18.2402	17.9545	26.0784	43.0836	24.6628	15.9561	33.1479	16.8507	20.7198	25.661	15.0478	18.0944	YDR425W
chrIV	1322160	1323484		51.2397	53.7721	61.1281	62.9815	42.6486	40.0039	26.8655	38.6703	31.6978	55.0147	40.2541	64.1554	YDR427W
chrIV	1323446	1324270		30.4221	30.1211	22.771	24.0198	33.6373	43.8736	22.0279	40.9493	30.7265	14.7808	41.3269	33.7036	YDR428C
chrIV	1324372	1325341	1_RiBi	101.261	98.0133	41.6372	27.7581	51.4593	107.886	24.5296	102.651	49.8896	23.0218	114.278	106.765	YDR429C
chrIV	1325276	1328550		27.0756	27.6785	25.2645	25.9338	28.747	28.1127	37.6989	29.1178	33.7968	27.2789	23.7312	27.216	YDR430C
chrIV	1328738	1330453	1_RiBi	143.144	137.986	125.812	127.541	120.808	145.831	143.823	154.752	124.604	129.543	159.122	173.033	YDR432W
chrIV	1331139	1332957		17.8591	18.2415	18.1126	25.7513	23.0884	19.9468	25.8054	21.6497	14.927	22.1095	20.5534	19.4343	YDR434W
chrIV	1332818	1333995		13.4865	14.3145	25.3681	27.9491	14.9742	7.63267	20.4429	9.43727	17.8752	32.0927	8.23979	14.6018	YDR435C
chrIV	1334566	1337068	3_MSN2	15.3092	15.9656	25.3609	27.9107	23.2559	15.4668	32.6969	19.5097	24.4302	30.4799	15.2973	15.9899	YDR436W
chrIV	1339573	1340829		17.8202	18.2762	17.6878	21.745	20.596	20.8374	19.3005	20.7659	14.9386	15.2522	20.9149	19.9183	YDR439W
chrIV	1342389	1344347		16.3211	16.7992	13.8259	15.7508	11.4505	14.0874	8.41992	14.0151	9.56355	10.9482	18.8945	19.7705	YDR440W
chrIV	1344386	1345209		47.7961	49.3813	26.0691	26.1221	25.4519	43.5884	20.7709	40.9802	27.4369	16.8667	45.9545	41.521	YDR441C
chrIV	1345128	1349966		14.9857	15.3559	14.411	13.9293	14.8072	13.7844	19.3503	14.3398	15.275	13.9057	13.0177	13.3335	YDR443C
chrIV	1350196	1352393		19.4469	17.8826	18.2712	13.9697	13.9409	13.9444	12.7193	14.6182	12.086	11.8184	15.937	20.8598	YDR444W
chrIV	1354709	1355586	2_RPG	299.248	288.122	70.8986	18.7071	282.76	410.566	33.0194	352.775	172.51	5.11669	435.431	321.974	YDR447C
chrIV	1356038	1357435		34.8686	32.5745	27.0256	20.2861	37.7725	43.6615	27.6106	47.9649	36.8513	29.1382	41.9859	39.2974	YDR448W
chrIV	1357388	1358955	1_RiBi	40.9118	38.7547	7.90759	3.75426	16.5275	44.5566	3.54106	40.9849	11.3923	3.6799	55.5635	52.3029	YDR449C
chrIV	1359856	1360916	2_RPG	323.131	306.4	103.812	30.4864	318.442	440.024	49.0595	380.906	185.444	20.1405	429.229	322.466	YDR450W
chrIV	1360905	1362241		46.9904	43.1439	50.3102	62.8369	58.1762	56.0505	30.6163	61.0738	38.521	20.612	51.7536	50.2161	YDR451C
chrIV	1362726	1364940		39.4914	39.8818	44.4379	44.2317	46.0148	41.0826	43.3689	42.6556	44.1644	52.3145	41.6727	41.5899	YDR452W
chrIV	1364986	1365742		26.6797	28.3589	31.7324	44.4286	35.9086	30.2596	44.6871	26.2567	36.2425	39.4354	25.2982	24.0573	YDR453C
chrIV	1366158	1366862		53.074	50.9308	31.1254	31.9947	37.059	62.24	27.9684	50.4118	30.1806	22.6187	56.5207	54.3375	YDR454C
chrIV	1367417	1369455		16.9908	17.57	21.0442	26.4558	21.98	18.0179	26.6407	18.5238	16.2813	18.8175	17.71	18.2781	YDR456W
chrIV	1369674	1379673		20.9844	20.9361	22.098	24.2847	26.9192	24.8865	31.4916	28.8301	21.7924	20.8598	28.435	26.2288	YDR457W
chrIV	1379878	1382093		21.9852	23.0129	24.2015	29.5619	36.378	33.1074	37.2377	34.3859	30.5785	25.3964	33.1528	26.4725	YDR458C
chrIV	1382213	1383537		26.7621	24.1191	30.2484	41.8431	30.7512	28.0111	33.5282	27.3385	21.1318	25.4069	25.1373	27.0149	YDR459C
chrIV	1383669	1384916	1_RiBi	53.8686	53.0971	53.8127	63.2093	71.0507	67.3513	96.1421	65.6952	26.4556	25.0922	47.138	44.2883	YDR460W
chrIV	1385151	1385432		125.28	109.541	106.442	206.434	227.987	206.215	406.597	168.861	38.5805	15.3535	99.4524	74.9195	YDR461W
chrIV	1385353	1385822		29.8918	29.4661	38.0925	67.0363	50.3404	42.5432	70.4877	40.8809	29.1075	29.9659	29.0975	19.496	YDR461C-A
chrIV	1386009	1386639		62.5323	63.5378	73.8962	71.7851	63.3256	54.374	77.6075	50.2685	43.6489	51.0023	44.3144	54.4671	YDR462W
chrIV	1386759	1388585		40.4126	39.0896	35.1291	37.0918	44.3554	53.263	46.3442	56.5789	40.2782	39.6816	58.912	43.958	YDR463W
chrIV	1388752	1393245		18.465	17.8534	15.1863	15.5313	16.617	19.6384	14.1921	21.5458	8.9381	8.80428	23.9556	24.4594	YDR464W
chrIV	1393154	1394640		30.3279	26.385	4.28267	2.46331	8.25461	27.6181	4.14229	23.9522	3.73602	2.57203	36.3902	33.3243	YDR465C
chrIV	1395005	1397857		21.2276	20.8948	23.0114	19.3015	24.0127	20.0708	22.8263	27.8982	22.3704	28.4462	24.5791	25.1322	YDR466W
chrIV	1397927	1398858		39.6985	43.3108	47.956	60.6266	47.784	42.3374	37.6562	42.596	36.7457	41.2595	40.1839	42.4247	YDR468C
chrIV	1398973	1399822		32.8362	34.0224	30.1228	43.3333	34.1096	33.3255	27.7637	31.3104	16.6737	18.2464	31.9215	31.3905	YDR469W
chrIV	1399574	1401303		15.7238	16.4791	19.0525	19.9012	23.2343	21.8418	22.0127	27.2581	18.8125	19.5272	19.348	16.0319	YDR470C
chrIV	1401609	1402682	2_RPG	358.533	347.401	138.38	40.0195	348.616	437.056	65.2204	364.723	202.33	17.4313	383.075	306.278	YDR471W
chrIV	1403195	1404312		66.4347	62.8982	62.5918	49.2607	58.8567	65.7323	43.2383	60.6534	66.5182	61.4794	70.432	60.2661	YDR472W
chrIV	1404269	1405920		18.5922	16.8764	15.8407	20.1198	19.1206	20.8382	20.6339	20.7239	14.5142	13.5478	22.9667	19.2898	YDR473C
chrIV	1407350	1410190		18.6645	18.5711	26.7006	30.8985	27.0013	21.1837	34.167	25.8546	29.3136	32.2269	23.4119	19.5817	YDR475C
chrIV	1410252	1411190	3_MSN2	55.7462	53.7229	88.1486	98.8635	71.0524	48.2531	130.117	46.7189	65.379	80.4367	44.2878	46.4131	YDR476C
chrIV	1412077	1414393		27.9517	26.7371	37.1519	34.774	29.2547	23.9242	29.2805	28.5899	31.2382	40.3735	26.0307	31.8361	YDR477W
chrIV	1414536	1415237		33.4127	30.2029	17.2285	18.4677	21.3294	34.789	14.3536	27.6709	37.5897	31.2015	30.8447	29.7258	YDR478W
chrIV	1415125	1416934		20.9257	21.8451	33.7412	35.0394	29.5567	21.0475	40.348	26.7751	37.6895	42.7733	21.7526	22.5988	YDR479C
chrIV	1417332	1418695		19.482	19.8231	28.2518	43.6712	26.712	18.4053	40.7176	20.0286	24.2933	22.5793	18.8414	21.3847	YDR480W
chrIV	1418439	1420303		24.0519	24.5927	54.1108	138.775	67.1311	37.4536	109.774	37.1722	33.7375	30.0294	40.2788	26.7501	YDR481C
chrIV	1420325	1420945		43.3566	44.3322	79.1601	144.399	69.3789	42.5477	108.846	35.5781	24.722	30.9555	35.1353	35.0333	YDR482C
chrIV	1421106	1422598		41.0972	41.0512	46.2274	58.1344	46.6833	43.3441	61.7932	42.0101	30.6006	35.6504	47.6319	42.0148	YDR483W
chrIV	1422732	1424783		13.6278	13.6846	15.1451	17.0145	25.6221	25.1962	20.4922	25.3935	20.2588	16.0739	19.4034	15.4238	YDR484W
chrIV	1424665	1427248		22.2936	21.0348	20.4093	21.0415	26.5188	27.0149	30.4564	27.8738	20.1685	21.3102	26.9398	23.5776	YDR485C
chrIV	1427313	1428165		37.4678	39.5252	46.0301	59.8431	38.5077	35.9491	43.7166	34.0065	29.2184	42.0906	30.1923	33.4778	YDR486C
chrIV	1428249	1429057		45.7914	43.3746	39.9858	70.4495	46.8138	53.36	60.3009	51.7421	29.1154	23.8646	47.1651	49.012	YDR487C
chrIV	1429098	1430790		13.6987	13.2767	15.9881	19.313	11.7628	12.2177	17.3317	12.3616	7.40716	7.51407	11.1732	13.4974	YDR488C
chrIV	1430992	1432183		31.2363	32.014	29.7629	29.6035	27.8447	28.7146	23.8972	25.2049	27.9807	19.4028	26.8222	31.9966	YDR489W
chrIV	1431803	1434351		15.501	15.0398	20.1233	20.1774	19.7672	15.2441	24.9754	15.9756	37.7303	24.2275	13.9898	15.9082	YDR490C
chrIV	1434768	1435966		51.0874	53.2573	24.5574	36.6479	49.2107	80.0027	21.0813	47.1124	52.9838	17.007	88.993	51.5712	YDR492W
chrIV	1436098	1436690		41.8185	41.1613	43.5149	44.1718	42.5057	44.3902	39.3317	37.475	32.6389	28.7122	33.7198	39.5534	YDR493W
chrIV	1436864	1438088		31.0248	32.8031	37.2318	36.3821	41.7452	36.3777	38.9689	35.1947	35.0987	34.9602	34.3342	30.8361	YDR494W
chrIV	1437919	1441210		11.7018	12.3185	11.6731	14.0332	15.2367	16.2892	11.5878	17.3976	13.5152	13.7593	17.3984	13.6271	YDR495C
chrIV	1441356	1443439	1_RiBi	60.3593	55.3659	6.45115	2.99567	15.0273	63.1205	4.33137	56.7384	7.20754	2.24729	80.0653	70.7221	YDR496C
chrIV	1443607	1445566		77.2443	80.3418	81.0854	118.161	43.6862	44.3199	60.3669	43.952	77.4428	56.6146	49.6595	84.3764	YDR497C
chrIV	1445768	1447035		29.6594	30.5822	38.4567	44.9924	26.131	23.1294	33.5346	24.933	29.3917	36.9047	26.3296	31.7162	YDR498C
chrIV	1447800	1450188		20.2926	19.8365	16.6348	17.0559	17.059	19.5959	9.58845	21.6768	15.4758	12.8648	25.7984	23.9582	YDR499W
chrIV	1450105	1450871	2_RPG	288.547	293.656	111.655	39.5051	305.925	408.425	62.4027	335.273	203.074	15.2955	409.086	293.513	YDR500C
chrIV	1451326	1453059		15.8764	15.478	16.3136	14.9733	15.2026	16.2873	8.67203	16.0186	15.6604	16.5572	17.3172	16.5192	YDR501W
chrIV	1453014	1454519		80.9664	79.3378	103.341	126.736	36.0233	28.239	63.7737	27.6936	69.7478	52.5943	31.2905	80.0807	YDR502C
chrIV	1454828	1455947		26.8305	31.445	35.8757	37.9553	14.8914	11.1159	19.2322	12.2908	16.1765	29.1906	9.87873	26.4982	YDR503C
chrIV	1456587	1459499		20.3488	21.6206	40.1734	45.3976	33.4861	17.3542	40.8503	24.1424	41.2958	53.5194	19.252	24.4406	YDR505C
chrIV	1459245	1461570		26.5084	26.8479	35.5815	33.428	24.5177	20.2267	27.8003	18.0229	20.0947	28.1497	18.2505	22.6503	YDR506C
chrIV	1462176	1465906		34.7089	38.6438	32.6393	36.7844	25.6015	23.2849	28.9744	26.104	8.16187	8.90732	25.1029	41.6837	YDR507C
chrIV	1466225	1468486		100.081	96.7134	178.613	44.4941	112.803	82.0144	10.6821	87.5417	86.5692	73.3594	111.598	131.035	YDR508C
chrIV	1469313	1469837		112.074	119.603	166.419	145.103	96.2476	70.419	100.411	58.7398	65.3725	116.536	55.4904	92.8079	YDR510W
chrIV	1469970	1470505		42.5657	40.184	78.708	79.5976	75.4257	51.7461	89.0759	51.7999	81.6417	83.2267	39.9872	36.3458	YDR511W
chrIV	1470414	1471063		42.675	46.9678	128.952	111.057	95.029	40.289	80.6871	39.7108	119.375	142.779	28.072	29.505	YDR512C
chrIV	1470993	1471549		44.0631	49.6732	155.009	132.627	154.809	58.6345	105.626	64.1526	247.448	262.498	46.5706	36.876	YDR513W
chrIV	1471497	1473058		27.2678	26.8543	14.7529	12.1051	19.7089	28.823	16.3562	29.3009	32.9797	12.3753	31.597	29.0919	YDR514C
chrIV	1473200	1474805		18.8145	19.8339	16.6341	17.1971	9.29748	11.7921	6.42432	12.1027	9.88297	15.577	14.0611	22.3197	YDR515W
chrIV	1474854	1476586		22.326	24.8883	97.8842	51.5318	26.7209	11.8148	45.3976	18.1381	149.354	273.628	11.5217	15.1165	YDR516C
chrIV	1477123	1478463		38.8395	37.761	66.6477	50.0861	29.8969	17.6775	38.5232	17.8937	35.1969	63.2414	17.0784	35.8693	YDR517W
chrIV	1478557	1480211		14.6318	14.1743	16.6769	19.2815	22.6242	19.6441	29.9867	21.3825	21.373	14.9962	16.809	14.0212	YDR518W
chrIV	1480354	1481013		48.5842	51.52	56.6332	63.3285	36.4056	36.2232	37.3524	30.9123	21.0309	44.4245	31.0612	44.0987	YDR519W
chrIV	1480963	1483487		17.8581	18.3785	15.2116	14.5691	17.8196	20.6049	17.9732	20.265	11.8395	11.6568	22.5163	21.0584	YDR520C
chrIV	1487269	1489055		32.0959	31.7701	26.9443	33.2496	27.5572	33.309	24.4165	31.8839	18.0419	18.6238	31.6275	33.099	YDR524C
chrIV	1489242	1489592		318.014	292.244	296.825	278.275	311.536	335.123	146.738	222.079	243.411	147.787	325.18	347.55	YDR524W-C
chrIV	1489440	1489841		902.769	859.93	827.354	777.597	809.704	839.156	588.994	675.83	525.184	373.694	621.83	781.205	YDR524C-B
chrIV	1490508	1490898		108.621	104.991	160.969	180.927	114.83	66.7779	156.9	75.1214	109.097	107.275	39.8412	76.6178	YDR525W-A
chrIV	1491027	1492438		46.8983	45.7185	20.1415	17.2518	17.8778	39.531	15.9749	39.9215	17.7329	11.8325	45.8668	49.7874	YDR527W
chrIV	1494266	1495962		46.5508	48.8137	38.9964	37.8128	31.777	32.588	35.739	35.422	24.2684	43.8816	34.4812	50.8337	YDR528W
chrIV	1495971	1496603		92.4501	106.86	157.833	115.698	134.491	75.1812	120.091	66.2268	126.016	178.818	67.4698	91.5215	YDR529C
chrIV	1496671	1497914		42.9017	46.0933	78.0426	68.2147	52.763	29.7599	73.8185	30.8909	49.615	70.5402	29.7748	38.4775	YDR530C
chrIV	1498177	1499417		24.8	21.9977	25.0967	34.2545	18.2628	23.4708	17.8483	21.7278	15.6412	21.434	25.1367	27.4643	YDR531W
chrIV	1499353	1500603		19.9744	23.4923	23.6272	28.5514	20.7814	19.5465	15.5721	19.1263	19.982	26.564	22.3708	23.1202	YDR532C
chrIV	1501358	1502222	3_MSN2	21.2686	21.8582	29.9891	44.478	49.2492	35.328	76.664	44.7874	176.279	98.4521	25.7871	19.3846	YDR533C
chrIV	1507788	1509798		9.24383	9.40875	9.82459	12.2065	8.94267	8.62773	12.9249	8.40057	7.39185	9.90526	8.2657	9.20644	YDR536W
chrIV	1519524	1520932		13.6714	14.3433	12.8594	21.8075	15.1599	13.9248	26.0616	15.3343	14.1743	8.41091	11.5668	10.4734	YDR541C
chrIV	1523229	1523700		0.358344	0.265924	0.406263	0.193142	0.530807	0.554183	0.860658	0.481295	0.476369	0.162144	0.255456	0.161847	YDR542W
chrIV	1525837	1531770		0.132572	0.139951	0.137967	0.132277	0.110275	0.0843486	0.143951	0.127441	0.0800758	0.0777111	0.0939221	0.130162	YDR545W
chrIX	448	6620		1.08864	1.13854	1.25085	1.23817	0.787267	0.629984	1.47594	0.830739	0.490091	0.888132	0.709606	0.982675	YIL177C
chrIX	8759	9173		0.610072	0.525121	0.690773	0.275773	0.55215	0.521304	1.07271	0.308986	0.57128	0.591884	0.485918	0.365	YIL176C
chrIX	11491	16427		12.2422	12.4827	12.5984	14.2138	19.4849	18.9327	25.9661	21.082	17.1864	9.3472	17.8813	13.5697	YIL173W
chrIX	16699	18660		4.69404	5.16472	5.78757	7.39274	5.6144	5.21125	7.81279	4.75001	5.32772	5.52902	4.65421	4.35206	YIL172C
chrIX	22895	26159		167.436	165.721	261.887	252.2	300.774	197.578	226.72	228.306	146.954	63.8896	210.595	154.031	YIL169C
chrIX	33616	35009		18.6848	17.7478	26.0983	157.181	23.304	14.86	62.8132	18.3262	15.6597	17.246	14.6102	18.4346	YIL164C
chrIX	37345	39126		16.009	16.0283	16.3194	16.9227	12.4286	12.792	15.8872	14.091	16.0089	22.2429	13.3265	15.2836	YIL162W
chrIX	39422	40174		34.833	34.0836	30.3349	35.2062	33.0189	34.9548	26.5697	33.0786	24.3447	21.4375	33.4206	34.5802	YIL161W
chrIX	40207	41478		9.44006	7.70089	8.18744	6.69056	17.81	15.7141	17.3981	18.5628	19.6196	8.42018	14.7683	11.0438	YIL160C
chrIX	41809	46071		23.9355	23.8136	21.9179	15.6846	11.7825	12.8868	6.44129	11.5776	6.8653	8.02174	15.6796	23.4124	YIL159W
chrIX	46189	46910		70.7795	60.6972	54.7909	42.2571	24.4313	32.0217	9.45372	23.5273	13.8944	22.0954	40.8874	64.6993	YIL158W
chrIX	46740	47575		31.9738	31.3683	48.6051	58.9583	36.3669	24.6144	44.063	23.2646	36.2332	43.7128	22.1186	29.0585	YIL157C
chrIX	47666	48055		46.1453	47.8129	84.1853	118.489	47.5375	27.1887	67.3751	22.4059	33.5345	61.0559	20.4252	36.0735	YIL156W-B
chrIX	51499	53778		17.3625	16.5211	39.3837	29.0823	20.174	10.5979	38.0589	14.9174	33.0283	53.6038	8.86951	16.7289	YIL155C
chrIX	53910	55072		44.0392	41.2124	91.4193	85.5282	63.2738	31.1577	103.123	43.3791	58.5327	85.3432	32.2345	42.0609	YIL154C
chrIX	55164	56425		29.7914	28.2183	43.0076	59.5755	32.557	25.221	57.2921	28.4688	33.3353	47.3129	25.0954	30.2255	YIL153W
chrIX	56528	57382		27.1716	27.0056	39.9897	49.9952	31.7597	25.7615	32.8088	26.4039	37.491	38.3583	24.1714	28.0811	YIL152W
chrIX	60896	62761		23.7078	22.8548	14.2736	15.1725	19.3175	25.4443	20.4414	24.9334	13.9809	8.52907	28.4476	24.7977	YIL150C
chrIX	62930	68208		24.5765	25.2069	23.3673	20.6346	30.3533	30.9693	20.2315	34.892	23.1065	21.4072	35.1684	30.1189	YIL149C
chrIX	68681	69594	2_RPG	371.893	371.341	129.134	44.107	366.342	470.991	57.1688	401.794	234.005	22.1025	468.228	374.449	YIL148W
chrIX	69500	73668		25.4098	24.2871	20.137	17.2569	27.793	28.8915	23.7606	33.4369	19.1264	10.8287	34.1431	29.1998	YIL147C
chrIX	74077	75945		9.83217	9.91619	13.9256	45.7852	20.2441	14.6931	67.3127	17.6152	16.9817	12.0201	14.2799	11.7675	YIL146C
chrIX	75930	77355		43.2203	40.9324	37.8511	52.9031	36.2397	34.6788	59.7441	34.8057	24.2436	26.0376	37.5045	43.2537	YIL145C
chrIX	77993	80377		26.1847	26.7386	29.8654	31.2836	31.9666	27.6938	24.4408	30.4975	31.6454	33.9964	29.1223	32.2083	YIL144W
chrIX	80287	83077		25.0085	23.8146	21.4511	20.1672	23.7907	23.2485	28.5607	26.7757	26.7628	25.5985	24.2762	26.1144	YIL143C
chrIX	83264	84939		86.6762	79.3262	62.5135	57.4447	47.2567	60.7947	50.4537	65.1014	33.8331	42.2757	67.0241	96.7072	YIL142W
chrIX	85215	87885		26.303	29.3526	28.5475	33.8868	23.6062	25.3285	24.1578	28.1362	19.3329	16.1289	23.6495	31.1226	YIL140W
chrIX	87878	88736		23.1218	22.9011	19.132	19.5838	23.9108	33.2823	14.4121	28.9921	21.021	13.8101	28.9924	21.3032	YIL139C
chrIX	88878	89744		54.9799	56.7394	52.8208	74.3533	64.4068	62.7903	58.829	54.9703	48.0267	49.9518	67.7238	55.7468	YIL138C
chrIX	89878	92836		19.4985	21.3852	22.5183	24.3656	27.172	24.6051	31.4606	27.4224	29.3348	23.9902	27.3137	21.9124	YIL137C
chrIX	93574	94885		27.1274	29.8276	62.4266	85.2702	52.9387	27.4951	106.049	32.2869	131.527	204.881	25.42	20.445	YIL136W
chrIX	94921	96432		33.9334	30.9554	47.0132	53.5129	45.0088	31.8365	55.9984	36.876	43.4962	50.2211	32.0238	35.0576	YIL135C
chrIX	97334	98505		55.5437	54.4107	40.5474	32.1247	58.167	70.6776	35.9726	76.1325	51.4615	19.7964	81.5802	57.2587	YIL134W
chrIX	98426	99433	2_RPG	330.133	316.133	105.311	30.1461	300.978	390.705	56.1451	327.274	171.257	13.6397	402.093	330.605	YIL133C
chrIX	99703	100561		39.5513	37.3416	29.4082	22.4793	41.3272	46.1709	16.102	42.6899	45.0802	49.6425	34.6632	25.3041	YIL132C
chrIX	100718	102328		24.1624	22.0726	21.2141	14.7711	15.2797	17.7496	9.90198	15.1032	12.5777	18.0588	20.2524	26.3356	YIL131C
chrIX	102630	105760		35.6494	34.1908	22.2422	23.1951	30.8413	40.3134	28.6791	42.6768	32.3383	17.4124	46.5407	40.9393	YIL130W
chrIX	106022	113344		14.3977	14.5108	17.5346	14.548	18.8085	15.8549	18.4378	19.0712	18.6761	23.0794	17.3441	17.6418	YIL129C
chrIX	113721	116950		24.2396	24.4201	21.8945	17.1481	24.7418	26.2568	16.2629	28.0968	19.9029	19.2651	29.9057	28.7517	YIL128W
chrIX	116990	117683		57.3109	53.6675	10.2816	5.91192	15.9274	43.9546	6.38595	34.7215	9.37506	4.80052	45.4374	57.7695	YIL127C
chrIX	117909	122207		36.9488	36.8604	37.9374	38.0365	30.3957	29.7721	27.9644	31.3627	17.8173	24.9851	36.1929	44.1279	YIL126W
chrIX	122394	125819		25.4506	28.2532	49.162	49.1591	34.8157	18.7006	57.5974	24.1296	40.9086	70.2098	18.9522	26.9446	YIL125W
chrIX	126145	127199		43.8617	43.6145	79.7572	72.1919	59.7637	35.5629	48.3595	42.3267	106.107	100.881	28.1251	37.901	YIL124W
chrIX	127661	129919		62.6653	66.3317	73.2941	84.2204	101.772	90.2847	105.175	113.582	56.5073	39.1814	66.4715	74.3724	YIL123W
chrIX	130307	131818		16.5668	16.3933	13.3225	10.3894	30.1139	32.3571	30.0764	39.0132	34.4589	14.8087	29.3247	18.0065	YIL122W
chrIX	132218	133999		15.1496	15.305	29.2563	46.9385	38.239	20.0453	78.5422	21.6783	15.1011	13.4351	14.2844	10.8478	YIL121W
chrIX	134298	136199		49.7955	51.3209	50.5781	36.3231	26.1277	28.4413	29.5638	25.6565	29.5863	28.0817	26.4761	38.115	YIL120W
chrIX	136408	137903		29.348	27.3455	55.203	30.1227	34.5716	23.1485	18.6078	31.3237	65.4589	37.4835	23.0953	24.0077	YIL119C
chrIX	139601	140489		52.6059	54.7547	62.5982	59.35	45.8892	45.3516	43.0201	47.1686	34.1903	37.8771	45.2229	59.7068	YIL118W
chrIX	140536	141634		27.5333	29.2664	34.0864	87.5104	164.588	189.003	235.87	161.7	136.654	40.2194	121.825	34.1419	YIL117C
chrIX	142842	144180		30.8299	32.2739	34.5435	90.0604	40.9795	39.9526	67.3106	39.5543	29.546	27.6429	32.4372	29.9694	YIL116W
chrIX	144264	148888		23.9718	23.6391	22.0721	16.6041	27.7657	29.7755	20.5991	34.6496	17.5371	15.2146	33.2339	27.0098	YIL115C
chrIX	149130	150020		27.0337	25.0604	32.149	29.6565	31.3397	32.6583	35.8641	32.6285	42.5906	43.9236	28.7089	24.4359	YIL114C
chrIX	150526	151293		14.4546	15.7601	38.9849	46.6427	42.5121	21.5003	69.7397	25.9737	115.467	83.7177	17.9558	13.4758	YIL113W
chrIX	151550	154935		23.9303	23.4309	39.4653	53.2221	48.7644	30.0234	72.2967	38.0503	44.7125	34.6001	29.5105	27.6133	YIL112W
chrIX	155151	155799		44.5875	48.0756	112.957	112.002	128.353	48.242	138.507	74.7241	216.135	114.39	37.9874	39.1996	YIL111W
chrIX	156013	157291		32.4003	29.4697	16.24	11.905	16.6488	27.8047	14.6623	27.8007	18.257	11.1704	30.4427	35.1013	YIL110W
chrIX	157270	160272		44.8316	44.5251	49.9515	49.1632	43.6779	38.2691	76.4668	47.8511	49.9281	68.432	38.9709	50.8717	YIL109C
chrIX	160672	163050		29.3892	29.8002	34.2779	46.81	39.9519	32.976	88.706	42.3237	38.808	41.2389	27.4657	27.5583	YIL108W
chrIX	162885	165942		11.6217	12.9828	19.5515	36.713	30.4361	24.9077	50.8438	26.8886	27.2858	27.6437	17.1297	11.1926	YIL107C
chrIX	166398	167527		46.342	42.4867	58.1365	53.5524	52.4239	39.8335	50.9626	41.9703	18.552	29.8824	46.9465	45.7631	YIL106W
chrIX	167412	169781		23.7632	23.6531	37.9443	29.0184	23.8408	17.4763	24.5428	21.4911	35.6787	73.0632	20.556	26.8478	YIL105C
chrIX	169906	171558	1_RiBi	26.0678	24.4178	8.6584	10.0852	12.2337	27.1074	11.5577	26.6587	13.2545	9.39685	32.2237	28.9579	YIL104C
chrIX	171661	173102		30.3179	27.6982	12.0318	6.84472	13.8598	27.9945	10.2361	27.7432	9.63807	6.84088	33.6372	35.2104	YIL103W
chrIX	175288	177451		8.98046	9.62881	18.9452	30.3982	15.6347	9.1327	41.6791	14.8781	45.7626	67.4923	9.04618	8.47495	YIL101C
chrIX	177978	179663		5.02712	5.38467	6.35043	10.8767	7.85252	5.9317	16.2683	8.83636	16.0819	15.541	5.70358	5.49755	YIL099W
chrIX	179681	180281		31.3113	32.1723	48.5489	69.4657	39.2332	26.8794	44.5671	25.6002	36.6164	44.9756	24.3159	26.2309	YIL098C
chrIX	180400	182069		9.67011	10.5647	19.0816	28.0906	16.8836	9.43548	17.9794	11.4249	26.1111	30.9537	8.51501	8.94197	YIL097W
chrIX	181975	183192		19.5818	18.7861	6.44235	5.30529	8.79055	19.9531	5.57567	14.9111	6.70977	4.36979	21.8003	20.1048	YIL096C
chrIX	183767	186444		15.9423	16.2193	17.1741	21.5162	17.1267	16.6105	20.4239	18.1097	20.7259	19.2261	17.7057	18.035	YIL095W
chrIX	186308	187673		54.4937	49.8988	37.7312	37.4436	39.0616	58.8117	39.4535	58.228	30.4647	12.0633	60.1746	59.4538	YIL094C
chrIX	187890	188946		74.7263	72.8367	65.3304	45.4962	45.8032	58.9268	39.2189	53.4686	38.8608	32.1004	50.0779	63.0472	YIL093C
chrIX	189011	191083		18.5443	17.2521	12.2387	15.0052	16.8236	20.6058	13.9673	21.036	11.9323	5.77554	22.4274	19.6986	YIL092W
chrIX	190991	193243	1_RiBi	43.4725	39.1012	6.40611	2.6538	16.1447	47.923	7.28897	42.9325	12.713	2.33436	56.4671	50.2178	YIL091C
chrIX	193456	195429		31.8929	32.0424	19.3382	21.9957	24.4985	37.5724	18.9537	33.6336	22.059	14.986	39.739	33.8075	YIL090W
chrIX	197839	199483		16.7074	18.552	36.342	91.1048	34.8153	16.2557	82.0896	17.3411	26.882	30.8834	15.7715	16.3641	YIL088C
chrIX	199567	200192		25.2644	27.3223	64.1784	112.716	53.7695	23.3027	104.335	26.8368	73.6845	87.0438	19.1587	25.9591	YIL087C
chrIX	200437	202115		29.4494	29.0722	24.2409	20.141	26.9219	31.2549	20.7567	34.9004	31.9804	26.0876	36.9329	32.5628	YIL085C
chrIX	202242	203300		52.2133	52.4093	45.536	41.2425	45.6796	53.7964	33.7643	49.903	36.8575	35.1049	54.7231	53.1985	YIL084C
chrIX	203458	204757		28.158	25.4635	23.0885	24.3718	23.1506	30.5659	26.9292	30.9855	19.81	15.8044	34.5443	28.4311	YIL083C
chrIX	210822	212135		44.7641	39.1021	7.66524	6.90977	13.7706	36.3086	5.97403	31.3112	9.85426	4.53998	41.7747	45.6775	YIL079C
chrIX	212433	214778		84.6816	78.774	25.8738	22.9622	30.4874	69.876	13.7445	69.4166	21.8525	11.2903	87.9886	97.6119	YIL078W
chrIX	216616	217803		48.4779	50.4794	52.431	73.6003	53.5391	52.8064	57.8446	51.2457	36.6645	47.2524	48.8814	51.7396	YIL076W
chrIX	217765	220761		57.5185	58.5744	73.9797	75.0241	39.7609	30.6406	51.214	35.8987	33.4473	84.8952	32.9153	71.7094	YIL075C
chrIX	221027	222623		36.652	36.9233	40.5256	47.0484	29.1554	27.1033	41.5753	27.7289	19.8033	25.425	26.9887	33.517	YIL074C
chrIX	228431	230026		15.9678	16.4047	22.4359	40.6953	32.4328	25.8429	24.3332	26.6989	35.749	21.1233	25.0602	16.8508	YIL071C
chrIX	230147	231149		42.5196	45.0876	50.865	72.8012	48.3934	38.1511	47.7232	39.3997	38.7527	33.9642	42.7224	41.4745	YIL070C
chrIX	231372	232413	2_RPG	338.527	339.155	101.453	24.8974	305.789	422.183	45.7592	363	170.369	6.67489	416.216	335.372	YIL069C
chrIX	233023	235532		20.0205	19.9249	20.373	21.2928	31.1188	31.1484	20.9407	30.861	21.2316	19.3907	32.4824	21.4856	YIL068C
chrIX	235640	237818		15.2149	14.2232	14.8	19.099	13.8427	13.0385	17.1463	13.3034	14.9028	15.5681	15.3248	14.4208	YIL067C
chrIX	238015	240755		4.20968	4.34607	4.75607	8.73917	10.5629	9.80142	16.9756	12.8101	20.3484	4.43982	6.71457	3.53214	YIL066C
chrIX	241232	241865	3_MSN2	25.5168	24.7036	30.9596	29.8591	25.4079	22.1018	21.2377	20.1817	32.3308	31.6991	19.4142	19.8197	YIL065C
chrIX	241942	242796		34.2961	31.8919	8.479	6.80582	13.0591	32.9952	7.28382	28.3315	10.9496	7.51198	36.5472	31.9511	YIL064W
chrIX	242724	243791		43.5341	43.7309	44.9311	59.6928	44.0705	42.3327	51.0518	41.7383	46.5008	45.412	45.5022	43.1851	YIL063C
chrIX	243916	244499		79.8267	76.2543	109.641	134.96	65.8306	40.3921	79.6814	42.7545	81.079	102.767	42.9902	67.7238	YIL062C
chrIX	244446	245577		31.051	32.1512	35.4102	47.0301	22.8402	23.7783	30.2717	20.9087	16.8721	22.7507	21.282	26.9567	YIL061C
chrIX	246276	246540		2.76439	2.19523	3.14811	3.77629	4.13057	2.86708	2.98693	3.33269	5.07652	2.2775	3.92027	3.09667	YIL060W
chrIX	247900	248468		4.83252	4.08702	5.05658	8.93643	7.00058	5.23204	19.4515	6.11548	8.09114	4.21528	4.72035	3.00127	YIL057C
chrIX	249652	251971		40.3375	41.8018	80.7413	52.6404	61.1036	51.6429	44.2262	50.8193	69.4017	109.441	53.0295	41.0049	YIL056W
chrIX	255081	256027		372.419	331.199	174.103	179.063	208.521	391	236.193	323.735	141.469	232.478	387.133	368.147	YIL053W
chrIX	256176	257093	2_RPG	338.664	335.775	91.4291	24.8469	320.003	445.281	46.011	380.775	177.007	8.57764	451.261	353.393	YIL052C
chrIX	257725	258368		159.239	153.884	223.33	378.896	371.777	315.804	331.074	257.905	228.172	199.384	239.472	150.267	YIL051C
chrIX	258792	259789		37.0481	38.3932	55.1369	111.099	55.012	41.6874	64.0656	42.4845	36.6768	48.6526	43.5089	35.6227	YIL050W
chrIX	260151	260989		35.4973	39.3251	39.315	51.5664	50.7169	54.5735	42.4272	48.4601	44.3467	30.4845	44.4069	32.3658	YIL049W
chrIX	261131	265018		25.0516	24.6759	26.2983	23.091	31.3948	27.0582	22.7063	31.8265	28.4917	24.784	32.3707	27.6931	YIL048W
chrIX	265030	267860		54.9729	50.4574	35.127	27.0241	53.6885	66.7643	66.9165	65.8253	27.4709	18.7255	74.9789	59.1175	YIL047C
chrIX	268650	270682		30.0006	28.2663	28.7006	37.6813	36.59	28.7911	93.5993	32.6715	26.8106	30.3032	29.664	33.4864	YIL046W
chrIX	270879	272781		12.3569	13.3813	24.4046	28.5537	24.2197	15.9882	28.5747	16.8456	54.8414	72.5599	14.1162	11.7164	YIL045W
chrIX	272834	273871		31.4003	29.6674	35.4319	41.9418	45.3743	35.7074	48.6932	36.2154	28.3996	26.0068	33.1191	28.9543	YIL044C
chrIX	273968	274969		50.0682	51.2084	50.9111	53.5522	56.275	53.5886	60.2982	51.0473	38.4679	31.0921	48.3218	48.9387	YIL043C
chrIX	275057	276342		27.2978	29.6055	45.2337	53.6898	33.7785	21.7335	54.9013	25.8024	27.5201	40.234	20.9274	26.3767	YIL042C
chrIX	276483	277592		51.8597	49.4422	58.4785	57.9007	52.9324	47.8483	72.1429	46.7814	36.233	48.8688	43.59	48.0537	YIL041W
chrIX	277687	278245		60.5654	58.0454	46.9269	53.7686	72.8243	85.8834	54.5356	68.1589	52.5902	27.1881	61.5545	50.9995	YIL040W
chrIX	278373	279994		22.3409	22.4176	21.5965	24.8958	30.5817	31.8734	41.7605	33.5632	20.7431	14.0557	30.3048	23.2996	YIL039W
chrIX	279979	282894		31.6508	31.5485	25.1404	21.459	31.7377	35.5734	23.5802	38.5768	27.9013	20.4306	40.3902	36.1182	YIL038C
chrIX	285482	287538		32.7654	31.3581	60.4441	51.3195	45.4583	25.4617	43.7333	29.3226	45.8611	61.9901	26.8882	31.3257	YIL036W
chrIX	287437	289060		43.9457	46.8648	34.8919	34.425	40.3165	42.1973	23.7758	42.9859	37.0435	28.0422	45.0485	45.5667	YIL035C
chrIX	289152	290141		55.5662	55.2864	71.0858	72.1767	59.3683	40.7828	66.57	42.9935	67.7312	59.9318	38.8689	48.5979	YIL034C
chrIX	290239	291776		38.8556	38.5584	67.6354	53.6926	41.0045	22.9273	46.7804	29.3527	67.9407	86.8781	24.1926	36.1392	YIL033C
chrIX	292462	296135		19.7644	21.1324	22.8878	19.9305	30.5755	29.0999	27.5194	33.7735	34.3515	21.7001	26.6112	22.9286	YIL031W
chrIX	295964	300057		33.81	32.4547	30.6729	24.9914	28.574	32.2682	20.38	32.4584	13.949	21.1366	37.0026	39.2619	YIL030C
chrIX	300450	301361		11.4935	13.1072	16.2714	23.9763	24.7443	18.5819	29.5282	19.737	27.1931	23.6336	14.3685	10.8156	YIL029C
chrIX	303592	304182		60.2448	59.3663	52.1379	43.8554	43.8973	50.2617	27.1482	40.6043	31.5036	29.8582	45.8114	55.93	YIL027C
chrIX	304335	307937		19.2928	20.6617	24.5495	34.6631	17.0985	13.9689	24.5584	14.663	8.28839	13.1096	15.4034	23.4825	YIL026C
chrIX	308581	310462		25.8607	24.2628	24.4509	30.6889	37.7585	40.7803	64.4029	43.3045	40.1682	34.6765	25.68	25.9121	YIL023C
chrIX	311046	312685		59.6862	59.1196	54.3582	56.3256	53.2443	55.8676	63.474	58.6725	40.9109	49.7309	57.8004	64.3752	YIL022W
chrIX	312792	313994		55.2407	55.7418	40.467	32.8172	42.3401	53.3366	28.2406	51.4419	30.6831	26.5776	53.0926	57.7622	YIL021W
chrIX	313915	314908		27.5806	30.7601	13.9638	9.18169	33.6627	54.2383	14.3787	49.8649	24.0951	11.7366	55.7459	30.0235	YIL020C
chrIX	315057	316244		32.4457	29.9074	4.55037	2.55185	24.9034	60.9244	5.46248	49.0912	9.04771	2.18439	65.7622	35.2824	YIL019W
chrIX	316725	318021	2_RPG	442.235	424.972	135.051	36.7216	480.961	610.697	77.4308	596.111	283.987	8.8881	606	452.336	YIL018W
chrIX	317938	321041		19.3924	19.577	24.9873	27.7807	31.0048	25.0693	30.9348	31.0978	32.6055	29.1526	27.4156	21.191	YIL017C
chrIX	321386	321992		162.844	162.474	189.498	223.234	245.216	203.722	322.234	180.644	76.219	50.611	140.37	120.961	YIL016W
chrIX	322267	324105		84.9727	78.7915	94.9412	122.27	206.369	181.647	323.748	186.249	36.2438	6.89429	127.832	70.2566	YIL015W
chrIX	325114	325613		6.39501	5.23489	5.50788	12.3918	5.51589	5.52096	7.06222	5.05914	7.86246	7.99647	5.9676	4.26904	YIL014C-A
chrIX	325928	327998		23.5582	23.7193	22.2947	20.2784	19.6823	22.9413	15.4318	21.1338	14.3255	15.6358	25.1147	24.9063	YIL014W
chrIX	328099	332555		11.6594	11.6097	11.7054	14.5636	12.7773	12.7108	14.3481	14.5526	24.3871	23.2276	13.5546	12.204	YIL013C
chrIX	333694	334609		8.07802	6.5548	7.43402	8.99923	9.942	10.8865	15.6453	12.1814	15.0031	5.78493	10.4494	7.17411	YIL011W
chrIX	334831	335709		18.2396	22.2642	31.8398	54.1788	19.6814	14.2217	35.846	13.4333	25.3601	35.9744	15.6857	19.2619	YIL010W
chrIX	335516	336269		28.7753	29.4014	40.1148	60.0762	30.3909	23.3367	38.2882	22.1364	21.538	28.8971	22.5545	24.9063	YIL009C-A
chrIX	339329	341632		57.8168	59.0209	45.8881	59.387	52.8631	59.4035	33.7718	59.0525	22.0185	11.8945	80.1121	54.2794	YIL009W
chrIX	342443	342961		38.1867	35.4038	18.4565	32.7378	24.1245	33.6047	81.4604	30.2577	10.6603	11.709	30.0574	32.5016	YIL008W
chrIX	342832	343681		26.4	28.4919	37.6166	84.688	49.3235	38.4286	215.119	49.6809	32.4365	37.4845	33.9012	24.7723	YIL007C
chrIX	344045	345352		21.5878	23.6977	38.6091	50.7157	29.9032	16.3254	57.0118	19.2726	26.3452	40.9547	17.4552	23.3407	YIL006W
chrIX	345558	347986		19.902	20.2512	24.715	29.3205	21.5977	18.096	24.1195	17.6879	16.2876	25.6026	18.7586	19.4766	YIL005W
chrIX	347883	348533		39.8074	43.4429	43.6056	39.5098	31.4322	29.2548	28.2212	26.901	23.5112	33.097	31.1354	37.9296	YIL004C
chrIX	349069	350090		26.5776	25.3934	21.8409	27.587	17.1326	19.8178	15.547	18.0242	12.6724	20.9707	21.9291	24.7953	YIL003W
chrIX	350272	350582		57.8951	65.6419	54.0736	68.2388	52.6493	50.0043	39.263	36.0437	32.087	44.8209	42.3443	51.171	YIL002W-A
chrIX	350438	353596		18.3828	19.0743	23.9264	31.3526	21.1154	16.0198	29.1319	17.1255	16.558	26.256	17.098	18.2421	YIL002C
chrIX	353880	355576		24.1686	23.7976	26.9827	26.107	21.4799	22.2606	18.8183	20.7998	17.9414	29.2827	25.8588	25.9949	YIL001W
chrIX	355989	356979		27.1543	31.6155	28.2217	38.1806	27.8726	26.1655	34.3087	25.0926	23.4498	24.347	25.5347	27.1796	YIR001C
chrIX	357327	360486		19.9382	20.3763	21.9902	27.1668	18.0668	17.4628	22.1772	17.917	15.1185	31.4497	20.6649	21.6749	YIR002C
chrIX	360836	362996		28.244	27.1621	36.402	43.472	32.2982	23.2942	44.1888	25.6967	32.7534	44.5769	25.5492	27.5614	YIR003W
chrIX	363167	364629		34.2834	36.2934	37.2925	53.7847	40.1359	36.079	49.5725	37.4319	25.0736	31.2871	39.5431	36.3134	YIR004W
chrIX	364887	365402		22.4094	22.6409	27.8299	56.0503	26.8559	22.4057	20.6029	20.4142	21.7467	26.8153	21.9097	22.9591	YIR005W
chrIX	365402	369968		33.8881	34.3733	44.6531	43.7134	32.5744	25.5904	38.9843	32.1818	34.3534	51.1039	32.4343	39.0286	YIR006C
chrIX	370608	373110		10.8458	11.4775	16.4985	30.5539	19.0731	12.8368	33.7543	15.2668	23.0662	20.8892	12.8738	9.63254	YIR007W
chrIX	373006	374364		24.3275	26.1567	24.9585	33.4165	32.1026	28.2313	37.3735	29.2278	33.6506	18.6927	30.3085	24.6891	YIR008C
chrIX	374446	375305		33.4852	35.3734	37.1721	39.4708	32.9638	32.3782	33.1078	30.6733	28.0671	18.7959	30.0781	30.3279	YIR009W
chrIX	375336	377289		31.0673	31.1359	37.5478	36.8439	35.3025	26.2874	38.132	28.8682	39.2436	30.7074	32.2016	34.3437	YIR010W
chrIX	377211	378279		45.2024	47.3391	42.9507	38.8074	41.5514	43.3904	40.3857	42.041	37.0709	33.3928	42.6996	47.2855	YIR011C
chrIX	378445	379906	1_RiBi	66.7703	59.7883	25.2811	19.7537	29.4831	57.334	26.7906	53.0936	31.8364	14.8138	61.9043	69.5313	YIR012W
chrIX	379929	380462		8.51432	7.83944	7.19784	5.74278	8.05227	10.6763	18.4727	11.4871	8.63343	5.10745	6.8927	5.75538	YIR013C
chrIX	381061	381833		70.7077	69.8272	77.8373	58.5562	56.2616	50.6146	63.5537	48.9788	70.889	82.7287	42.8124	52.716	YIR014W
chrIX	382586	383475		30.037	26.9006	56.6648	35.9573	32.3285	32.1059	53.2104	41.2012	75.4515	133.012	40.6175	32.8321	YIR016W
chrIX	383397	384119		34.5543	34.1819	55.0755	78.9407	21.6993	15.4298	57.0457	18.026	38.9855	54.8911	11.1371	20.87	YIR017C
chrIX	384608	385822		33.6341	29.6365	42.6843	50.5561	35.6517	27.7543	78.8318	36.0296	37.8888	37.2987	27.228	28.4143	YIR018W
chrIX	389475	393745		7.21135	7.27648	7.11353	4.1499	8.37146	8.57139	6.89883	10.3789	12.1662	9.60566	11.5285	8.49885	YIR019C
chrIX	397241	398419		34.3963	33.2735	28.2522	19.0434	19.4819	23.5745	15.7946	22.7494	18.967	15.5245	27.8193	31.5218	YIR021W
chrIX	398513	399338		37.7729	38.3233	42.0838	46.3258	33.1959	31.9611	46.9704	28.1471	26.3613	30.4419	31.7886	35.6249	YIR021W-A
chrIX	398674	399338		40.061	40.0959	43.7433	48.1001	37.0328	35.2556	52.2685	31.4942	29.1005	32.2009	35.7426	39.9284	YIR022W
chrIX	399747	402799		23.0809	24.0285	27.2967	29.3513	25.1569	21.4379	32.5729	23.7058	14.2459	16.8399	24.501	26.7541	YIR023W
chrIX	402763	403534		24.136	26.5	30.6266	39.8694	28.2666	22.8507	37.606	19.7575	20.5355	27.965	22.8735	22.8515	YIR024C
chrIX	403641	404796		20.0994	19.2104	23.5678	27.0346	20.7262	18.7254	29.6318	18.3117	11.4778	20.7817	20.958	21.9464	YIR025W
chrIX	404779	406006		30.9013	28.9152	8.10519	4.28235	11.1513	26.9688	6.97696	23.1532	5.43084	8.61225	35.0067	32.9981	YIR026C
chrIX	411983	412809		12.1775	12.2347	21.9461	56.733	20.9704	9.9941	81.4998	9.47259	7.81785	11.6903	11.5017	12.0305	YIR030C
chrIX	412960	414802		36.7694	37.0558	97.1993	230.673	120.704	28.1734	275.51	31.374	25.0209	33.1525	31.0893	36.1881	YIR031C
chrIX	414905	415678		69.3302	67.1724	407.842	205.274	355.903	46.7193	847.381	44.2715	42.7255	59.0707	41.6014	48.6017	YIR032C
chrIX	416070	419567		35.5764	39.2736	44.0658	56.859	33.2115	26.1208	42.9599	21.7004	16.3696	25.5928	36.5245	38.622	YIR033W
chrIX	419542	420785		27.2985	27.3455	33.841	81.7137	34.3595	29.9258	81.5076	31.4919	28.6724	29.4884	31.4358	26.7846	YIR034C
chrIX	420961	421858		27.7483	25.7051	29.1046	33.3626	39.1527	37.6917	71.9766	35.2794	19.8121	18.9601	37.2215	26.925	YIR035C
chrIX	422005	422921		20.1969	19.7518	29.7292	30.9771	22.0379	12.7329	36.9918	15.8866	24.5222	32.7191	13.3002	18.5134	YIR036C
chrIX	423024	423768		23.6326	24.4275	46.2697	57.5379	24.0035	12.4999	46.529	15.0951	40.7693	59.6168	11.1771	19.6488	YIR037W
chrIX	423690	424542		12.1158	13.7179	31.4977	61.504	18.7504	8.36165	54.9565	11.9471	39.3589	60.5613	8.02275	11.7127	YIR038C
chrIX	430321	432256		4.22666	5.8793	9.9101	22.4872	28.5921	18.9887	44.0527	25.7125	56.8018	36.5285	16.258	5.22429	YIR039C
chrIX	433720	434324		1.34629	1.02854	1.13748	1.64533	3.18611	2.80346	5.03301	2.81983	3.97008	1.62192	2.31325	0.826904	YIR041W
chrIX	434895	436051		15.697	14.6111	20.3695	92.2379	40.5849	27.3273	80.6529	25.4297	26.0493	8.63315	20.3342	12.3449	YIR042C
chrV	13585	14644		25.8816	27.0876	42.3862	65.174	37.4401	25.3806	50.3107	23.7086	23.186	24.2377	22.2747	27.1163	YEL072W
chrV	16287	17963		76.1836	81.3891	242.651	361.338	487.776	583.11	508.412	559.015	106.821	36.2026	496.883	88.0764	YEL071W
chrV	19588	21233		1.26338	1.15841	1.38808	2.05286	5.76707	4.65725	8.58044	6.49426	13.6237	2.1227	2.69243	0.880365	YEL070W
chrV	21428	23231		5.63142	6.1509	6.39899	8.15636	5.62371	4.68039	8.94263	6.00681	7.48642	7.37013	5.21425	6.56109	YEL069C
chrV	25993	26970		26.234	26.1855	46.2051	74.6232	30.2027	19.68	47.6337	16.3136	13.3227	17.1803	17.737	22.5361	YEL067C
chrV	27614	29619		34.5799	33.689	53.936	50.3057	30.2236	24.081	37.7498	20.7381	14.6761	4.95357	20.2507	25.7602	YEL065W
chrV	29692	31283		16.5121	17.2283	21.8458	44.853	20.3255	14.4408	39.5284	14.9751	16.5913	12.5732	13.6616	16.1644	YEL064C
chrV	31424	33721		45.6138	47.445	226.358	234.597	248.192	41.011	349.55	44.2622	36.9344	29.5214	42.5026	55.9215	YEL063C
chrV	36273	39632		21.2134	22.3597	23.7965	20.278	19.3616	20.6034	15.6584	21.1131	15.5531	16.8265	23.8226	28.465	YEL061C
chrV	39810	42015		35.8447	38.6108	140.083	296.369	127.12	40.7717	500.554	45.4721	135.014	180.08	36.7154	37.1825	YEL060C
chrV	42343	42748		20.4601	20.8458	39.4969	81.1306	53.0647	34.4086	193.785	42.5763	33.5522	22.7096	25.3455	18.4597	YEL059C-A
chrV	43207	45001		39.0489	36.3486	37.3454	82.452	60.5933	58.665	137.586	65.1437	27.697	23.8461	52.0531	43.6249	YEL058W
chrV	47089	48404		38.56	37.3363	44.4512	40.9656	36.0796	31.3252	37.8207	31.5814	37.5892	38.0629	35.1903	37.959	YEL056W
chrV	48397	51633		38.0504	37.0911	16.9735	11.4484	22.3997	40.1508	9.13495	37.6578	16.4823	9.2259	46.9978	42.8993	YEL055C
chrV	52480	53343	2_RPG	405.933	397.654	92.5087	20.0456	322.694	460.713	33.9244	394.521	224.658	7.61291	449.065	390.796	YEL054C
chrV	53816	56169		21.3527	20.8268	14.1189	10.4735	21.5834	24.9333	9.04578	23.669	14.8807	10.8326	29.078	21.334	YEL053C
chrV	56535	58171		19.6391	18.0656	25.5984	26.3947	27.0911	19.8933	33.587	23.6979	29.8046	27.7077	20.664	19.2829	YEL052W
chrV	58306	59257		73.4599	68.0925	69.1295	72.5147	65.03	68.0049	59.3207	61.7595	42.7647	37.732	64.0219	68.1763	YEL051W
chrV	59514	60945		49.664	46.8179	44.3894	34.8248	33.5538	38.2369	33.1453	39.5922	31.6878	31.0623	35.4278	40.0109	YEL050C
chrV	63712	64112		5.11318	4.03145	2.38517	4.5093	5.35328	5.05727	6.4729	6.05165	6.10628	2.71163	6.2222	5.07948	YEL049W
chrV	64192	65193		30.4416	29.2222	8.16969	8.68741	14.8759	28.911	6.7078	23.555	9.30827	3.58162	32.9776	34.0738	YEL048C
chrV	65308	66818		28.5935	28.5022	22.7366	25.9773	34.2418	48.7237	42.2901	50.5558	69.3107	27.0364	43.2531	23.2773	YEL047C
chrV	67046	68909		337.665	316.082	245.945	90.1459	66.6782	122.136	48.4785	98.3403	100.476	114.725	159.001	367.45	YEL046C
chrV	69727	70309		99.7028	88.4635	97.7358	52.1094	55.4745	58.0403	61.4667	46.1655	64.1953	73.9777	54.7503	87.2112	YEL044W
chrV	70432	73462		30.9091	29.3028	29.9498	19.5748	25.9478	29.2311	22.0782	31.5426	33.6333	28.0981	33.6417	33.1775	YEL043W
chrV	73557	75475		39.6329	39.0259	23.6558	17.9511	20.848	31.0127	14.9046	30.5187	22.1117	16.9734	39.6665	49.322	YEL042W
chrV	78013	79500		219.701	220.909	139.704	199.675	340.204	430.81	236.567	378.434	206.429	50.2579	350.62	222.335	YEL040W
chrV	79529	80065		25.6925	27.7385	89.7135	65.4157	195.84	62.9301	106.34	84.8731	579.215	420.903	56.4245	24.9282	YEL039C
chrV	80410	81200	3_MSN2	24.9695	24.816	39.2639	36.9541	38.9885	23.5625	55.5306	21.7546	70.3927	54.8735	21.9778	22.2306	YEL038W
chrV	81243	82805		60.2867	60.0822	55.0456	45.3505	25.3509	31.6188	29.4884	33.6884	23.1304	38.7511	39.7475	67.0076	YEL037C
chrV	82966	84696		53.8066	52.478	42.3315	31.1967	38.2439	53.123	55.6969	64.7492	26.0352	25.0618	58.9722	62.921	YEL036C
chrV	85582	86368		875.409	883.048	854.65	515.466	731.628	737.976	447.018	735.384	724.001	723.161	777.783	874.819	YEL034W
chrV	86885	89999		39.8954	39.9902	38.8299	42.5196	33.7574	35.9761	44.2643	41.0374	17.6601	17.7658	45.2574	41.6978	YEL032W
chrV	90221	93991		46.2871	47.9078	50.0501	47.9052	28.7488	26.1535	29.5801	28.7895	14.5349	46.347	34.776	55.7526	YEL031W
chrV	94221	96742		17.6123	17.7414	19.7196	25.2708	14.4025	13.1506	18.5332	13.3203	11.2583	19.3658	14.8821	16.3139	YEL030W
chrV	96750	97860		27.9574	27.924	22.043	34.0649	25.087	31.8212	27.0124	27.5372	11.1093	12.4816	34.0718	28.8092	YEL029C
chrV	100698	101528		142.321	142.483	129.502	129.613	114.512	145.792	111.013	138.67	102.522	79.7286	144.717	146.361	YEL027W
chrV	101752	102395	1_RiBi	306.532	303.363	44.4055	12.2919	56.3044	264.44	9.41849	191.259	73.1684	10.767	242.751	274.881	YEL026W
chrV	102375	106186		23.3475	25.0608	28.8055	20.3219	24.7673	22.6535	17.1087	26.1555	28.3897	29.6578	28.792	26.32	YEL025C
chrV	107145	108314		88.0174	94.3785	143.95	101.004	140.833	83.4011	118.255	78.4747	137.039	185.816	97.9863	96.8995	YEL024W
chrV	108439	110552		8.62036	8.83532	10.0555	7.50699	17.3363	16.6954	13.8217	18.0635	17.1608	8.86508	18.1739	10.6903	YEL023C
chrV	111353	115877		21.9186	21.8908	20.1139	15.2074	18.8869	18.6934	11.9108	19.0242	15.5768	13.8011	22.1161	26.1845	YEL022W
chrV	116107	117031		56.8535	55.9776	61.677	54.3324	67.0279	66.4532	89.8402	65.9447	735.644	810.408	467.422	524.253	YEL021W
chrV	117134	117591		181.988	181.132	185.116	207.325	154.327	165.833	173.028	133.891	108.755	97.3422	122.491	146.899	YEL020W-A
chrV	118514	120366		10.2421	9.68529	11.355	13.1535	16.2491	15.9831	19.1807	18.3593	20.5225	14.2553	16.5559	11.1473	YEL020C
chrV	120346	121310		17.398	16.7211	14.38	15.34	18.7832	20.3532	17.7765	17.3172	15.1251	11.4826	17.7866	15.2911	YEL019C
chrV	121436	122378		52.9462	52.343	49.0939	46.2393	47.2717	48.856	50.0487	49.6263	37.5307	35.696	49.8863	50.4693	YEL018W
chrV	122380	123038		256.849	268.373	218.263	169.575	174.155	214.316	111.838	163.555	184.697	168.104	192.011	241.73	YEL017C-A
chrV	123615	124765		26.4329	28.1089	43.8465	35.6035	26.5129	19.9022	39.1259	22.5964	30.0953	38.2654	21.3451	27.5972	YEL017W
chrV	124521	126424		20.7366	19.9291	23.4813	20.2928	18.2701	19.3074	18.3874	19.9622	16.5839	16.8883	20.233	20.7728	YEL016C
chrV	126589	128340		44.5077	42.419	38.5106	30.306	30.9474	36.6814	23.985	38.923	27.2128	29.9828	41.7744	47.998	YEL015W
chrV	128550	130745		26.1244	26.7494	33.5988	31.012	32.9999	29.1908	27.8568	32.8679	34.656	37.6793	29.2039	25.6097	YEL013W
chrV	131620	132641		11.5442	12.1172	32.2595	50.495	18.2905	8.16326	35.0047	8.37038	23.9646	44.7268	7.18433	8.42747	YEL012W
chrV	133088	135348		22.7161	27.5291	75.8891	54.9389	25.5732	14.8165	40.5189	17.4645	94.0559	288.141	17.689	20.1292	YEL011W
chrV	138821	139851		335.422	332.373	317.912	209.055	448.018	404.046	416.371	387.743	215.513	90.1105	476.231	401.891	YEL009C
chrV	141630	143924		80.1247	84.042	129.693	67.1116	77.9731	59.2721	24.7322	60.2314	41.3595	67.2946	75.1257	87.8631	YEL007W
chrV	144252	145927		35.0877	35.2568	47.8674	60.6905	35.7731	28.5017	40.5284	29.1466	26.9358	32.4911	30.98	36.4595	YEL006W
chrV	145823	146794		21.3843	19.3532	24.6077	40.1327	23.0263	19.169	23.1322	21.1092	22.9672	26.6883	18.7095	16.8502	YEL005C
chrV	146893	148067		26.8957	28.4944	29.8669	34.1714	22.2731	21.3623	19.2345	20.7555	20.3484	25.1878	20.6378	22.8541	YEL004W
chrV	148156	148724		42.1793	44.2277	31.5031	28.6043	21.0983	29.4862	7.83088	26.0373	17.629	17.977	33.6405	47.8594	YEL003W
chrV	148698	150089		41.8673	42.88	43.4524	42.7755	28.7467	27.9729	31.3507	27.8294	23.1027	32.2046	29.2079	40.7443	YEL002C
chrV	150205	151016		44.9439	44.1844	47.8933	55.0831	29.4868	25.6847	40.9748	25.2745	19.748	34.176	26.0598	41.2273	YEL001C
chrV	153403	155913		58.1843	63.9187	76.3278	132.371	35.4764	25.7043	31.031	21.5497	18.0804	14.2443	33.3023	54.9753	YER001W
chrV	156738	157588	1_RiBi	83.755	79.3315	23.688	27.4255	29.2465	70.6028	21.4436	54.4501	15.0282	9.77942	82.8408	88.5828	YER002W
chrV	157655	159161		38.5508	39.8704	41.3453	38.3303	17.0343	16.3272	16.915	15.4701	14.5727	35.5063	19.5725	40.9182	YER003C
chrV	159569	160516		60.2106	65.5397	72.2901	74.7128	30.4658	29.0396	43.7082	23.5962	18.9669	43.0636	29.6269	60.5254	YER004W
chrV	162683	164348	1_RiBi	67.7528	64.2096	8.68005	4.74679	17.6081	67.1597	6.09882	59.1741	7.98104	5.617	86.9559	76.9186	YER006W
chrV	164505	166215		15.8496	15.8215	11.6851	16.7246	13.6697	16.4749	12.6382	17.3059	10.1299	8.72217	18.6963	16.9811	YER007W
chrV	166047	166934		60.297	59.9483	35.8262	29.6676	33.7996	53.1042	22.8222	47.9909	26.3546	18.4786	54.2766	59.0192	YER007C-A
chrV	167739	171887		29.6657	29.6791	30.7498	33.4473	26.7233	25.6536	29.2081	28.2578	22.8064	30.9163	27.4271	30.3821	YER008C
chrV	172026	172667		97.8071	96.0829	71.0904	67.9996	54.6585	74.9644	48.0971	59.9042	48.9153	41.0999	66.4276	86.0958	YER009W
chrV	172531	173366		22.498	22.5419	26.8199	37.5725	24.1008	24.357	34.411	24.4958	21.9539	20.932	23.6461	23.0096	YER010C
chrV	175193	176168		7.08574	6.47868	6.17094	7.27718	13.9598	13.8363	21.3223	15.6859	17.4548	8.12366	13.0369	6.37054	YER011W
chrV	177748	178571		109.81	112.661	141.483	114.037	37.072	29.1282	31.7784	24.337	22.8206	89.9367	35.297	105.998	YER012W
chrV	178788	182346		17.9526	18.6213	18.4939	20.0085	16.4811	17.3435	16.4176	17.1744	8.84916	17.502	21.504	20.162	YER013W
chrV	182545	184332		8.43611	8.67467	12.0752	14.898	14.3787	11.9209	23.1494	12.7993	17.0101	17.632	11.0023	8.64967	YER014W
chrV	184465	187028		15.2757	16.2709	17.0507	21.4094	18.0736	16.3144	18.1226	16.3688	19.7848	13.0935	14.5952	11.9745	YER015W
chrV	188187	189431		35.6832	37.7729	39.233	35.8055	28.9984	28.2634	33.4442	27.7734	25.6911	29.3788	28.6224	37.4241	YER016W
chrV	189430	191909		24.9304	24.243	29.4935	25.9033	24.9457	21.0353	30.5293	24.1908	22.0052	31.3258	22.7659	25.9858	YER017C
chrV	191890	192711		72.5423	67.8157	94.1922	85.6695	42.5482	35.5461	72.6222	33.3126	24.8365	36.9921	31.2595	57.4067	YER018C
chrV	192796	194313		54.1661	52.5255	64.7947	68.1465	41.2096	34.8301	67.0266	36.4897	29.7315	40.9635	36.718	51.4871	YER019W
chrV	194228	194627		141.558	141.01	150.5	115.654	104.548	95.8727	113.979	83.7325	82.906	93.8566	80.2881	123.3	YER019C-A
chrV	195074	196693		31.4977	31.1648	64.076	59.8031	56.9956	29.6624	137.929	39.4885	69.6446	78.797	28.9717	29.0899	YER020W
chrV	196878	198650		67.4638	68.1141	80.8376	74.6233	32.3696	27.8463	30.8785	29.0526	31.1104	74.5358	30.1612	73.923	YER021W
chrV	198775	200976		20.3027	20.6917	22.4361	20.3803	20.8662	21.7884	16.0555	23.1264	21.0297	20.2248	23.0252	23.5821	YER022W
chrV	201022	202006		45.916	44.1105	67.2818	96.7916	58.1568	39.0337	98.843	44.3362	47.3001	53.9154	44.2783	48.3007	YER023W
chrV	202177	205080		28.4393	27.9815	23.5658	35.4256	29.0712	33.3261	39.7823	33.1717	29.3008	19.6582	33.9814	23.652	YER024W
chrV	205185	207096	1_RiBi	89.9863	84.1967	38.1978	24.8573	44.168	83.9027	37.6886	85.8459	41.6633	18.5246	95.1359	95.8836	YER025W
chrV	207517	208564		49.9767	52.6883	87.8228	109.3	46.9696	33.516	69.8639	34.9233	61.9767	61.3205	29.791	50.2885	YER026C
chrV	208747	210354		24.3119	25.6843	36.9442	34.1009	21.3083	15.2605	23.0659	17.5503	21.914	38.1998	17.1942	23.9888	YER027C
chrV	210646	211987		32.5313	27.1928	43.1423	21.3052	40.8834	28.8877	57.6267	31.2112	15.67	15.6557	22.9636	27.2122	YER028C
chrV	212474	213247		43.0238	41.0257	51.8052	42.3184	51.8191	31.9871	75.9505	37.0085	34.5199	34.2565	31.2709	43.9458	YER029C
chrV	213348	214024		42.7324	45.1756	65.654	71.7124	34.924	26.7213	46.1446	28.2023	30.9286	51.0592	24.5103	43.9216	YER030W
chrV	213930	214788		50.6274	48.4927	64.6153	57.0313	39.845	34.4032	52.0019	35.5658	34.4438	41.6788	36.0436	49.4425	YER031C
chrV	214969	217957		23.7263	23.5097	27.5409	22.3202	16.0697	14.502	13.4861	14.5584	11.0436	17.7614	19.2914	27.4378	YER032W
chrV	217885	221511		9.75651	10.9441	17.238	21.1474	21.0742	16.0482	25.0537	20.2032	25.3798	27.9299	16.8012	10.9751	YER033C
chrV	222565	223206		82.6348	87.0291	185.647	200.364	123.42	52.6384	202.09	65.3193	423.078	430.468	41.6156	67.5062	YER035W
chrV	223259	225237		109.692	103.899	45.5772	43.2704	47.2625	106.638	44.52	100.652	98.894	61.6598	125.022	117.999	YER036C
chrV	225777	227075		12.9158	14.2495	65.2438	87.1266	100.019	29.9386	76.4195	43.8019	191.715	180.074	29.7174	13.5845	YER037W
chrV	229707	232243		23.3398	22.9011	24.4888	36.2057	23.7272	24.2903	37.4201	26.4456	14.4981	20.8113	28.0198	27.5694	YER040W
chrV	232378	234904		18.6918	19.4593	19.022	18.3273	13.6046	12.9989	15.1488	13.612	12.0857	15.7279	12.5124	16.751	YER041W
chrV	234844	235655		37.4823	33.366	25.0179	12.8754	14.5745	15.7851	13.1965	16.7572	23.2021	17.6939	15.2378	31.8667	YER042W
chrV	235550	237202		184.648	177.442	116.631	95.8682	94.5659	148.211	96.7733	133.761	128.52	83.2047	162.034	189.768	YER043C
chrV	237448	238155		82.3304	84.3151	150.056	146.21	185.261	143.43	171.494	117.601	223.622	174.69	87.7021	60.3036	YER044C
chrV	239854	241576		10.9693	11.2817	12.0965	20.7274	30.0955	33.1319	38.13	39.4603	33.7844	15.7552	27.5663	11.2669	YER045C
chrV	243776	246690		19.1548	19.9878	23.0192	23.2276	24.0646	19.8797	36.776	23.0457	23.6832	24.7019	22.343	22.4054	YER047C
chrV	246859	248258		30.4542	29.6162	41.0403	37.591	38.2038	28.6671	43.9844	31.0281	36.0756	45.2608	28.1878	32.791	YER048C
chrV	250621	251334		58.7423	60.5429	64.2229	86.4662	78.0653	73.3845	91.7428	64.1624	57.5727	50.6881	54.3567	59.4297	YER048W-A
chrV	251709	253742		42.9068	41.2526	15.9216	17.1396	45.6448	74.8152	60.5865	75.1109	31.1314	7.46397	78.1729	52.8624	YER049W
chrV	253862	254453		50.7711	50.9897	62.3564	68.0858	48.3128	38.3843	55.7069	36.9664	43.1437	53.6077	32.609	44.6332	YER050C
chrV	254639	256290		14.8706	15.0921	17.2746	20.7295	24.8747	22.8439	36.4092	23.7254	31.4672	17.1121	19.2675	15.8107	YER051W
chrV	256262	258121		53.6875	50.7152	25.1944	75.9981	26.2689	44.5997	16.2247	46.6318	47.7807	35.5772	48.3912	73.7523	YER052C
chrV	258592	259736		22.8903	26.6299	96.6787	66.1263	78.6274	28.7495	51.1634	47.7886	305.494	275.941	23.5316	19.5422	YER053C
chrV	260715	261103		139.259	141.803	428.67	120.067	961.339	650.094	343.371	527.26	1209.47	996.504	415.883	102.179	YER053C-A
chrV	261955	264140		24.2103	24.4746	40.4589	33.3104	35.5945	26.8665	28.441	27.0661	74.0423	117.3	25.8659	21.8392	YER054C
chrV	264758	265917		63.2309	64.3786	60.604	190.848	64.3338	74.2822	64.1731	69.104	71.2383	95.8516	78.5065	98.8582	YER055C
chrV	266397	268203	1_RiBi	118.409	112.371	248.035	261.276	194.874	111.962	136.25	104.637	45.4542	10.7528	133.219	128.313	YER056C
chrV	269342	270216	2_RPG	319.026	315	107.42	30.6107	314.931	422.469	53.8651	344.878	173.05	18.6784	421.405	319.031	YER056C-A
chrV	270646	271205		76.6005	74.6252	58.2454	97.4482	128.427	147.135	80.1894	128.26	81.0851	40.9288	115.406	64.268	YER057C
chrV	271705	272237		36.4226	37.1426	56.6541	93.3964	54.0216	32.458	81.2992	32.3725	62.5334	76.9283	28.5758	28.9687	YER058W
chrV	272441	273977		23.3037	25.6332	35.3874	42.7249	27.1103	18.3386	34.4462	21.0185	28.7626	33.5234	20.2963	23.3019	YER059W
chrV	274421	276310	1_RiBi	23.9205	22.5609	25.5673	57.7227	44.8468	43.0363	69.6707	46.6558	42.5544	15.323	42.4949	25.1524	YER060W
chrV	278244	279665		12.926	13.2711	18.8976	56.9871	26.3581	19.0639	67.5848	22.8059	21.0409	16.3107	19.0412	13.4618	YER061C
chrV	279755	280747		19.4091	21.5722	46.02	70.2291	32.5665	24.7001	129.142	30.2688	92.2705	176.988	21.4362	19.1237	YER062C
chrV	281616	282514		55.664	58.2677	118.899	119.985	75.7861	38.5965	92.1298	40.5777	72.2299	109.554	32.4234	49.0137	YER063W
chrV	282446	284362		113.436	112.913	210.203	28.1899	55.272	52.1864	16.5378	35.3704	24.2073	61.5879	65.8326	118.77	YER064C
chrV	285123	287181		49.8719	49.4093	93.8607	46.4664	32.1582	25.472	38.7165	25.2292	21.4102	43.097	31.7636	47.2923	YER065C
chrV	291837	292643		35.014	47.1797	172.206	105.649	17.1176	9.35274	36.8963	10.2099	186.345	844.691	7.14517	18.656	YER067W
chrV	292929	294929		39.7239	38.7173	39.5462	62.1789	31.9757	33.1381	36.7901	36.1835	26.8466	28.6717	39.6584	50.162	YER068W
chrV	295336	298121		23.5754	23.0475	23.2738	52.3061	26.3289	24.6974	32.7017	28.7336	18.1967	19.2384	23.876	35.0958	YER069W
chrV	298871	301821		130.249	147.597	110.197	93.1092	37.5128	38.4847	26.8399	36.3191	30.1588	18.3233	47.3418	123.825	YER070W
chrV	301722	302378		55.4333	52.4502	59.1162	81.5438	57.5312	56.2854	40.3033	46.431	46.2509	38.3757	51.69	50.8434	YER071C
chrV	302697	303339		166.026	159.403	206.1	132.652	116.74	130.374	86.2466	108.925	91.535	94.5161	145.648	156.278	YER072W
chrV	303579	305867		142.775	137.96	101.413	87.7258	39.7826	61.8602	20.5663	57.9024	34.1991	27.9737	67.5933	136.955	YER073W
chrV	306296	307294	2_RPG	344.857	334.548	99.9567	29.7457	364.125	500.379	54.3569	445.759	224.459	10.1081	498.839	358.78	YER074W
chrV	307583	308214		44.4719	43.6082	49.2492	49.9943	51.1327	45.1448	32.8681	40.6046	41.8402	44.4387	40.4693	40.4238	YER074W-A
chrV	308348	311365		25.2191	25.1892	17.6526	19.0893	15.7655	20.2014	15.8359	21.7967	8.48954	5.76013	23.7653	28.9689	YER075C
chrV	312297	313637		12.2648	11.8774	14.913	15.9294	13.7771	11.498	15.681	13.161	14.9167	18.4012	12.5554	11.5192	YER076C
chrV	314548	316600		21.7348	20.5601	17.8256	24.2017	26.2513	30.702	28.3345	31.5037	15.6101	15.9868	26.7936	22.8515	YER077C
chrV	316701	318575		24.6707	24.8382	29.9101	49.2148	33.035	29.2413	29.9252	29.0291	29.8808	28.0544	26.8919	21.6478	YER078C
chrV	318840	319851		14.8882	15.0838	51.3984	69.7789	48.9716	18.536	46.0705	22.0247	52.3238	60.1169	16.5728	11.4721	YER079W
chrV	319917	321928		27.2661	26.1744	42.2361	57.2698	37.2412	26.0857	45.5994	27.696	28.009	35.9609	23.461	25.4477	YER080W
chrV	324179	325998	1_RiBi	35.8195	34.5471	8.48627	6.43623	24.2823	49.7652	18.799	50.2027	16.9677	5.68732	56.7279	43.8412	YER082C
chrV	326129	327075		45.8396	42.1464	39.4267	37.4	35.7066	39.9523	36.1987	35.3457	23.557	27.4469	36.1082	41.2861	YER083C
chrV	328367	330348		39.0015	38.3356	23.0878	34.6441	32.9088	51.712	35.424	49.9805	26.8565	12.2017	55.392	45.1277	YER086W
chrV	330529	332376		17.2777	18.2362	23.0323	32.6395	23.2636	17.8437	33.5971	18.8205	22.152	22.4347	18.239	16.8582	YER087W
chrV	332372	332876		82.3402	88.6334	79.7613	71.7087	41.0472	43.4285	32.6113	35.8299	30.0952	63.0576	39.9012	79.1991	YER087C-B
chrV	333040	335355		46.7266	45.003	73.6799	68.1815	62.2765	52.6482	55.0262	61.051	54.0091	85.7176	58.1295	50.0872	YER088C
chrV	335871	337691		42.1514	41.9251	52.7994	69.1804	49.2521	46.8526	52.2364	52.5508	55.718	56.5436	48.1251	48.2537	YER089C
chrV	337855	339560		32.6332	31.5274	20.7311	48.0189	30.2445	41.9537	25.0124	43.3491	24.6314	18.6538	43.9645	37.3333	YER090W
chrV	339637	342236		151.629	151.089	117.712	227.922	64.8481	68.1686	163.605	72.8446	109.302	34.2519	73.9453	107.874	YER091C
chrV	342815	343431		66.3955	65.2107	66.928	50.6561	50.5201	48.5892	77.2055	41.7264	37.5566	43.3567	38.4791	52.5007	YER092W
chrV	343260	347667		15.2475	15.0902	15.6066	16.8022	18.4966	17.1917	19.0417	17.7573	15.379	15.3441	17.6494	16.1871	YER093C
chrV	347787	348441		36.0515	35.5082	43.4482	50.1193	35.6447	30.943	35.2832	25.572	24.018	29.27	25.2727	31.0879	YER093C-A
chrV	348573	349455		73.2809	73.1483	98.1723	90.6152	36.1758	26.0783	38.5049	28.7661	35.0611	87.5662	27.3834	76.6024	YER094C
chrV	349912	351380		50.6564	56.0163	60.0431	59.5769	24.3415	25.7899	36.9609	30.4432	32.858	60.0879	33.9592	59.2461	YER095W
chrV	351613	353452		3.31436	3.45469	3.02181	5.27477	4.32961	5.65808	10.1264	6.78008	8.99864	5.74861	5.88234	3.16903	YER096W
chrV	355283	358056		9.35614	9.60775	12.7935	16.3509	8.10298	7.30072	11.2778	8.73198	11.5764	21.1232	8.54895	9.34981	YER098W
chrV	358030	359105		34.5606	30.5799	25.3457	24.952	25.7176	33.0054	21.2763	35.4163	27.6434	16.9378	35.0845	34.5114	YER099C
chrV	359275	360408		40.1819	40.9943	41.2389	58.0416	43.6326	41.687	42.3722	36.3667	34.2706	35.3819	43.3955	38.0302	YER100W
chrV	360285	361827		14.5077	13.3401	15.9568	20.4932	24.9705	22.9399	18.838	26.6235	22.7041	20.1775	23.5323	14.0601	YER101C
chrV	362732	363767	2_RPG	408.097	390.42	101.941	22.7609	415.244	539.641	54.5745	501.72	284.749	80.1899	554.344	422.372	YER102W
chrV	364534	366646		17.5573	16.9184	20.2517	21.6605	25.7739	22.0494	24.0725	24.7951	1240.29	1280.32	24.6347	18.1128	YER103W
chrV	366767	367810		27.6746	26.7413	27.5387	29.2772	21.4399	20.9972	17.9791	20.1649	39.6824	36.8843	24.605	27.0591	YER104W
chrV	367712	372033		21.8551	21.4946	19.6947	16.0257	20.0164	21.9191	15.8806	23.5015	16.3571	18.2721	24.5416	26.6915	YER105C
chrV	373339	374720		29.3903	29.0167	25.0423	27.2133	32.6585	32.9701	39.6182	35.0667	22.1723	18.4147	36.8629	33.857	YER107C
chrV	375027	377804		18.2241	16.8848	17.6474	20.2922	20.9521	20.7165	24.3892	22.0626	21.5793	17.71	22.3749	20.1707	YER109C
chrV	378608	382243		42.521	37.992	9.81262	3.35704	21.0299	51.3207	7.49484	52.3627	8.37936	1.94082	63.388	54.0436	YER110C
chrV	382508	386194		17.7292	20.6667	20.2256	20.5764	20.1055	19.109	12.7389	21.1933	15.2851	18.4338	21.3934	21.5435	YER111C
chrV	387130	387895		37.9127	36.9708	40.1246	42.5372	37.6367	34.8058	19.1387	32.6031	29.8666	33.4483	32.4953	38.0487	YER112W
chrV	387857	390209		25.6347	26.1667	20.6777	16.0492	24.9246	28.9119	19.6715	30.7634	24.2618	16.7894	28.5205	28.9578	YER113C
chrV	390350	394016		20.4119	20.084	16.2348	17.4466	19.0842	23.4752	16.8579	26.092	17.4833	15.5343	28.0164	25.1114	YER114C
chrV	394177	395073		28.0386	26.916	15.8669	9.79051	33.1216	51.7547	10.4745	53.8651	26.4473	15.9513	54.8221	30.9377	YER115C
chrV	394984	396271		44.4399	43.882	30.9476	27.0713	56.5933	73.9455	32.1219	68.2288	36.3197	23.6688	60.3655	35.1394	YER116C
chrV	396645	397718	2_RPG	370.335	366.482	115.328	41.6611	384.464	525.852	62.2517	454.074	231.235	14.0615	501.779	369.5	YER117W
chrV	397771	399261		30.2632	30.366	21.3195	17.6195	21.0339	28.6197	12.4406	29.9614	16.0614	9.42305	31.3609	33.3179	YER118C
chrV	399400	400875		31.23	32.5151	52.5998	64.5213	34.1641	20.2269	58.3287	23.6389	30.2584	41.6241	21.0151	28.0409	YER119C
chrV	401072	401973		79.0041	74.3542	82.1346	83.4302	60.4791	55.0017	69.1209	57.7826	48.546	58.1451	55.2535	73.8288	YER120W
chrV	402752	404432		56.9116	57.8122	48.8813	51.8869	42.6231	47.5593	40.6784	49.2757	36.316	40.009	54.8048	66.49	YER122C
chrV	404615	406720		30.6742	30.3106	29.0508	32.908	35.0809	37.5271	27.0271	41.7724	27.0329	23.0254	40.4189	35.3409	YER123W
chrV	407030	409102		96.5649	108.296	90.7865	115.465	118.579	123.25	54.0216	109.896	63.3585	18.2279	130.571	98.9988	YER124C
chrV	409684	413119		35.7183	36.165	44.1519	36.1751	37.3451	30.1375	34.1665	37.3771	46.9598	48.9604	32.7116	39.9393	YER125W
chrV	413009	414275	1_RiBi	92.138	85.2099	9.89599	3.71592	22.2258	96.5541	5.52042	79.1785	10.5241	3.86795	105.279	91.1437	YER126C
chrV	414450	415642	1_RiBi	62.2974	56.6037	6.71655	3.75266	14.8385	58.3672	5.11878	48.2954	7.06687	2.42372	72.64	71.5499	YER127W
chrV	415767	416596		30.8596	27.751	20.7747	31.9961	26.0129	35.5883	27.6239	30.8476	22.4731	17.9522	30.882	25.3418	YER128W
chrV	416756	420949		24.7434	23.7098	22.4481	20.178	27.4919	28.9217	20.2186	30.9738	21.1488	23.6163	33.8505	28.0819	YER129W
chrV	420895	422541		43.932	44.2415	41.9059	58.7102	76.0589	72.8467	81.8721	67.0411	30.8389	29.8579	59.298	41.2403	YER130C
chrV	423590	424456	2_RPG	322.147	308.264	78.4882	16.9202	300.869	462.987	34.4484	400.584	224.971	8.8099	451.092	330.045	YER131W
chrV	425053	430902		24.7984	23.9359	18.8021	24.3238	38.3205	45.5543	41.5848	46.9473	21.54	11.1846	44.2433	28.681	YER132C
chrV	432425	434187		76.4921	79.0003	89.2898	74.6707	63.5443	60.8279	46.2098	64.1634	88.4844	113.93	64.2419	81.8419	YER133W
chrV	437014	437857		29.1392	28.7332	39.6483	47.4091	29.9969	23.9219	32.4019	21.6842	42.119	47.5901	23.4555	26.2315	YER134C
chrV	439470	441297		32.7078	34.0692	55.9365	52.5788	37.2043	22.9169	41.4596	25.7913	26.6496	51.6142	22.3691	35.966	YER136W
chrV	441204	441838		22.1967	21.3992	12.2934	7.96479	13.2696	19.6815	6.68445	16.2991	10.0459	8.32828	17.8044	21.8404	YER137C
chrV	451506	453306		24.3109	22.6042	26.8496	31.0149	35.5995	33.6951	35.0608	30.6115	24.9825	21.1935	31.0217	22.0646	YER140W
chrV	453395	455117		28.769	28.0818	59.7364	54.9687	130.203	92.204	120.364	92.6412	124.471	71.5309	77.1611	30.3396	YER141W
chrV	455111	456127		13.1371	13.8632	27.6103	41.8539	21.5897	20.3587	25.9258	19.6331	26.9959	32.4855	14.9645	13.5059	YER142C
chrV	456248	457715		26.2192	28.161	38.6043	45.9715	22.1148	15.1422	27.9849	17.8614	22.9846	39.3858	16.7142	29.7185	YER143W
chrV	457691	460231		20.5018	20.4783	24.5722	29.0475	34.5493	28.0677	44.2863	32.5383	21.6256	26.6535	25.8358	22.3838	YER144C
chrV	460423	461784		110.271	105.662	82.5238	96.1061	112.684	130.043	181.618	103.088	58.5729	46.4001	105.25	90.3732	YER145C
chrV	462529	462951		70.9174	70.2477	73.998	61.9978	44.7068	49.3563	45.5878	41.9104	26.2788	43.2942	42.0796	62.8838	YER146W
chrV	462888	464842		23.1666	21.8582	20.4543	19.377	21.0205	23.5752	27.5647	25.3989	17.0838	13.2831	25.5408	24.2027	YER147C
chrV	465091	466215		67.4342	67.1659	49.5718	52.9664	59.4939	77.9755	58.885	74.4649	50.9934	43.1073	80.1025	73.4786	YER148W
chrV	466081	467546		20.9849	20.645	13.9342	12.0661	10.2441	15.592	8.06607	15.7263	16.71	26.5511	17.6088	25.2957	YER149C
chrV	468334	468981		7.0944	7.69946	13.689	11.87	12.5466	10.2925	24.955	14.5606	455.508	568.798	8.41634	6.73785	YER150W
chrV	469619	472597		27.5323	27.6904	26.0414	22.2621	20.4273	20.117	21.7419	23.1278	21.3095	29.4416	23.6102	32.7347	YER151C
chrV	472603	474018		27.239	27.7396	33.8308	47.5048	25.4575	20.4093	39.4105	23.7775	15.1654	23.8009	21.9943	26.2834	YER152C
chrV	474999	476295		58.3587	58.6715	60.0721	59.473	45.8331	44.398	44.5352	45.985	27.9942	33.5525	43.2544	57.6076	YER154W
chrV	476212	483117		35.9988	35.8424	37.4845	34.8642	39.8968	38.5402	32.2261	41.6975	26.6085	29.3968	43.4543	42.595	YER155C
chrV	483209	484356		91.1264	87.4402	64.0715	55.0557	40.0777	54.1485	54.941	54.6973	25.3478	30.2877	60.7049	91.1254	YER156C
chrV	484764	487229		21.3811	20.756	22.0073	26.1072	24.5202	25.2343	23.9633	25.2465	17.7926	17.6841	27.6093	23.8079	YER157W
chrV	488755	490780	3_MSN2	17.3834	17.5649	23.1882	40.2085	24.0094	18.1935	36.4275	18.2209	32.6699	33.0011	20.6815	16.4655	YER158C
chrV	491387	492168		61.4675	60.9557	60.0844	69.2035	60.132	59.3424	83.3791	54.2685	73.6038	97.1624	51.2451	56.3598	YER159C
chrV	499074	500394		33.4029	35.2719	37.8212	38.9797	30.4538	27.2947	34.6708	30.0933	19.4074	34.5145	33.7743	40.0947	YER161C
chrV	500599	502931		14.6958	14.2934	17.2069	21.6323	16.5562	15.306	22.3857	16.4532	14.9036	20.712	15.6794	14.7498	YER162C
chrV	502976	503789		30.8763	29.5937	44.3594	54.1591	29.3577	21.8976	47.2575	26.8692	36.8197	58.5828	21.4695	26.3691	YER163C
chrV	505079	509923		24.2399	23.3736	23.341	21.0889	20.6609	20.2641	23.5279	21.9596	13.6801	18.3762	24.4885	27.6504	YER164W
chrV	510230	512258		109.958	103.108	51.5538	49.9094	59.9849	111.181	51.5673	111.042	48.0713	32.746	133.66	127.326	YER165W
chrV	512443	517544		21.6121	22.0689	23.4462	25.5251	22.1403	20.14	29.0437	24.2103	21.8375	25.3382	22.2797	25.648	YER166W
chrV	517839	520783		28.9453	29.7753	28.7714	34.6675	40.8399	42.8575	44.2756	44.6244	28.2287	23.8185	48.5901	33.8468	YER167W
chrV	520966	522725		27.6995	26.7591	19.1713	14.5655	17.9383	22.4238	16.2544	20.8288	14.0868	10.8845	22.5881	29.2225	YER168C
chrV	523087	525963		21.9446	20.3932	17.3571	22.6148	12.991	15.9442	17.3049	17.4041	29.0792	24.8416	18.4947	21.8636	YER169W
chrV	525912	526996		25.6947	28.3371	32.4289	37.8899	21.4826	19.9501	25.738	19.1181	15.8932	20.9224	15.7137	26.1852	YER170W
chrV	526934	529537		17.5309	17.7499	13.9407	12.4208	17.9128	22.3801	13.5778	23.5901	11.6342	8.94875	22.2655	20.6146	YER171W
chrV	529411	536077		18.9425	18.5015	15.012	11.9937	18.8373	20.6347	16.2364	24.2994	16.7128	12.1994	22.1618	22.2877	YER172C
chrV	536269	538342		19.3301	19.0961	17.3835	17.3775	17.4262	19.0545	19.7918	18.4432	11.0024	11.9112	20.1325	21.2694	YER173W
chrV	538319	539308		24.2004	26.1124	25.6795	27.4451	27.5327	25.8729	25.6448	24.0722	23.6749	19.6026	32.6694	26.2533	YER174C
chrV	539300	540403		22.2153	22.7385	27.8667	203.837	32.1165	25.7495	161.832	27.4457	25.2422	25.1419	21.9502	21.653	YER175C
chrV	541647	545155		59.7335	62.0626	83.0599	77.6596	46.4873	39.7744	54.8729	42.8142	51.8151	104.238	40.3137	55.4071	YER176W
chrV	545555	546591		183.753	186.955	280.418	246.969	135.05	83.8642	222.738	97.5451	201.08	423.098	73.8252	166.251	YER177W
chrV	546756	548213		52.4729	49.9272	87.2294	99.4799	79.1875	53.4257	133.826	62.7853	55.6216	71.1576	49.2574	48.1685	YER178W
chrV	552489	553332		21.3212	23.0847	37.381	41.5518	29.3703	16.3407	30.0251	20.2243	36.5985	52.7456	17.5611	19.6383	YER182W
chrV	553251	554005		26.1356	27.0398	31.2463	41.0375	26.6758	25.8533	35.0744	22.2694	19.0008	24.8357	21.3382	24.8703	YER183C
chrV	555965	559051		11.0727	9.99154	12.3014	15.314	14.2053	12.9328	25.2547	13.8656	10.6907	13.6368	12.516	11.3277	YER184C
chrV	559317	560420		6.22326	7.61065	6.47789	6.64864	9.02401	8.10231	13.9504	8.37803	6.02968	5.88544	6.94616	6.80706	YER185W
chrV	561441	562817		22.6032	23.3881	24.1639	26.3523	20.1703	18.6157	24.919	18.817	14.5902	16.1683	19.2061	22.8497	YER186C
chrV	568032	568925		5.07606	5.06123	6.81218	20.1295	6.36441	5.48969	25.2427	7.31377	4.56746	5.78191	5.62105	4.90873	YER188W
chrVI	6425	7664		10.1222	10.6616	12.9599	13.9918	12.6346	9.94016	26.1592	9.64977	11.7512	11.2395	8.83357	10.1909	YFL062W
chrVI	9480	10335		6.47166	7.13147	7.50372	12.5671	10.4298	10.4572	43.0383	12.4324	7.33209	6.49055	8.79327	7.3954	YFL061W
chrVI	11196	12396		7.89282	8.53241	9.89282	18.202	6.95439	6.17271	20.7522	6.69422	5.46407	10.1613	7.17383	7.92812	YFL059W
chrVI	12897	14056		5.88945	5.72903	6.19787	11.8975	11.1416	10.6495	26.0309	10.5624	11.4909	7.86551	7.65579	5.15658	YFL058W
chrVI	20846	22825		7.74793	8.86959	13.7275	12.3045	6.37709	4.53988	27.2818	6.47672	13.7413	37.3988	5.18452	8.96759	YFL054C
chrVI	23367	25502		6.70444	6.89389	7.87651	8.55942	5.63493	5.72341	72.6173	7.54925	15.3855	29.735	4.81898	5.9431	YFL053W
chrVI	28221	29829		5.47213	6.41885	14.9469	8.6696	2.41206	1.97264	7.67134	2.80274	11.0368	26.3069	1.74104	4.4257	YFL052W
chrVI	29875	30564		4.9326	3.71843	6.19612	7.77501	6.53981	5.06321	18.1451	5.74583	31.6361	19.9431	4.80068	4.16925	YFL051C
chrVI	32954	36271		13.7822	13.5657	12.4081	17.2221	19.7891	21.8108	25.2044	26.0682	18.2351	13.5741	22.194	14.8385	YFL050C
chrVI	36771	38765		19.2087	21.1858	21.9107	26.1778	23.8991	22.6441	28.8208	24.4097	17.7222	20.8168	20.9602	21.1634	YFL049W
chrVI	38725	40226		25.6267	27.1677	26.0282	34.5434	30.8436	28.6633	45.3241	30.3139	24.7668	27.7287	25.9821	26.0439	YFL048C
chrVI	40412	42630		21.6851	21.2687	22.1912	23.361	25.7291	24.2097	36.3401	27.2124	15.6344	16.4021	23.1517	22.1632	YFL047W
chrVI	42744	43588		36.1269	36.3378	42.3092	47.5657	30.9157	28.7269	46.3233	33.0659	24.4596	29.6241	29.0809	38.0518	YFL046W
chrVI	43468	44466		134.477	139.91	103.641	78.5452	54.8133	73.5963	40.2316	69.1191	43.766	62.4269	73.8287	134.404	YFL045C
chrVI	44520	45597		87.2264	86.4233	91.3828	99.5386	42.7839	37.5693	51.0478	33.7939	29.5817	53.1264	33.0657	71.3667	YFL044C
chrVI	45657	47776		16.4476	16.9395	28.5111	43.5839	22.9285	11.6466	45.4959	14.5692	23.5925	34.0511	13.2309	16.6145	YFL042C
chrVI	49116	51188		18.1552	16.8184	18.6787	21.7562	20.2612	18.5888	39.2789	21.0206	14.5368	16.3739	18.9742	19.4688	YFL041W
chrVI	53156	54902		214.587	220.32	258.761	215.229	177.157	139.966	207.454	150.886	259.693	291.57	158.448	218.796	YFL039C
chrVI	55259	56068		112.169	113.178	161.648	159.221	88.6534	58.7786	139.442	58.1518	74.9269	117.751	60.8331	101.626	YFL038C
chrVI	56259	57935		52.4438	51.1099	58.9897	50.7239	27.5458	22.2598	36.9074	24.75	22.8922	43.1004	26.4983	56.9137	YFL037W
chrVI	58533	62877		24.2512	24.6397	28.5654	21.9422	21.6026	18.0819	29.0016	23.5407	35.1747	43.035	23.4837	28.5671	YFL036W
chrVI	62842	64056		40.6784	42.8326	33.3372	25.8959	34.7403	34.2249	31.4586	38.9257	34.4225	17.6509	35.4249	43.168	YFL034C-B
chrVI	64180	64973	2_RPG	358.067	355.1	104.523	33.3453	345.307	497.184	63.4228	393.971	275.395	8.52159	455.645	344.992	YFL034C-A
chrVI	65285	68817		15.5601	15.9682	16.2762	19.739	22.2626	20.5039	31.8708	25.3182	17.3526	15.4095	18.9639	16.4994	YFL034W
chrVI	68792	74667		18.4344	18.6803	23.413	32.154	28.5662	22.7577	62.3872	26.5474	29.6835	28.6595	19.1578	17.8284	YFL033C
chrVI	75112	76563		193.132	184.956	209.497	154.621	143.556	118.6	220.907	111.581	144.605	372.279	105.265	193.239	YFL031W
chrVI	76707	78075		15.9149	15.2562	23.0132	34.8273	22.9394	16.8589	34.9119	17.5463	21.2745	27.936	14.2686	12.6083	YFL030W
chrVI	77986	79199		14.5759	14.5063	21.8338	31.3916	32.453	27.5723	50.2409	30.7556	33.7789	22.7339	20.6327	14.2068	YFL029C
chrVI	79268	80255		22.4883	23.4596	25.3214	55.2175	29.4009	27.8749	34.1844	28.5297	28.4953	23.6095	27.3225	25.9055	YFL028C
chrVI	80351	81931		31.1583	31.8329	34.3228	53.8324	56.6257	50.643	72.1106	54.6082	33.0321	20.6912	48.7914	30.9602	YFL027C
chrVI	82549	84047		202.107	184.684	184.647	221.017	436.266	442.56	474.384	428.915	170.619	27.0179	338.617	165.297	YFL026W
chrVI	83717	87312		25.5319	25.3155	23.1667	21.1449	42.297	43.5144	58.0212	48.7316	25.2501	11.2016	37.6803	27.1515	YFL025C
chrVI	87702	90618		53.3969	53.5756	49.0262	49.0465	43.7093	46.6934	45.1862	49.5972	27.846	29.8746	50.3498	55.739	YFL024C
chrVI	90965	93429		20.3568	21.3306	6.91194	3.55907	12.8738	20.6873	6.85636	21.125	8.40715	2.72985	25.1597	25.8501	YFL023W
chrVI	93396	95104		59.1309	56.2824	38.8094	18.0809	36.2145	49.3005	26.4506	51.3238	28.9947	15.3221	57.6501	57.1329	YFL022C
chrVI	95965	97631		57.682	60.1975	268.942	65.1918	204.554	40.0438	287.992	42.2625	51.4577	53.9488	39.747	52.6295	YFL021W
chrVI	99190	99756		3.54205	3.37445	4.1992	6.44454	15.7636	13.9872	25.0184	12.5006	21.2476	5.84802	12.1705	3.79111	YFL020C
chrVI	101543	103229		32.1636	32.6	49.4092	50.7547	33.7954	21.3369	54.614	26.0094	35.6315	53.8004	25.8455	34.8999	YFL018C
chrVI	103639	104003		40.352	38.0153	41.9671	38.9243	28.6034	30.1607	37.5185	23.361	24.0799	25.8514	20.682	33.2576	YFL017W-A
chrVI	103783	104511		40.8502	38.5859	40.717	29.5683	25.1209	24.8545	28.7362	23.29	32.8041	25.637	22.9257	36.2931	YFL017C
chrVI	104597	106320	4_HSF1	56.8034	59.1414	76.3739	49.1207	23.1751	18.7266	54.3207	23.8763	503.779	578.99	20.7246	65.1284	YFL016C
chrVI	107196	107810		7.68526	8.37554	11.1131	21.31	20.7504	17.3798	218.476	34.0974	809.879	996.551	13.0485	6.20221	YFL014W
chrVI	107762	109962		26.3416	27.7081	33.126	37.5454	32.2624	26.2342	43.4992	29.9447	44.5901	62.4595	30.0806	27.4382	YFL013C
chrVI	112324	113985		1.47361	1.84296	1.51707	2.07364	2.74105	2.22683	5.42526	2.47671	5.23102	3.09763	2.09284	1.23892	YFL011W
chrVI	114945	115771		33.6334	33.0019	46.9824	68.7884	42.4321	35.0561	135.763	37.5407	31.9233	34.7338	37.2198	37.8941	YFL010C
chrVI	115952	118571		21.8994	21.3773	23.2748	22.6224	18.6096	18.0475	20.5083	18.9092	15.818	21.0819	21.8036	23.3028	YFL009W
chrVI	119375	123210		26.1782	28.1877	27.5418	27.561	17.3992	17.0069	23.7785	18.9253	12.6316	18.819	22.5683	32.8624	YFL008W
chrVI	123336	129988		21.7122	20.7307	20.8299	18.0928	13.3149	14.6034	13.9447	15.8197	9.79145	22.273	17.2221	24.76	YFL007W
chrVI	130121	131199		50.1101	51.8437	62.6065	66.6436	41.3523	37.9125	43.9448	36.811	32.8178	47.3116	41.9377	50.1462	YFL005W
chrVI	131666	134372		30.419	30.2514	39.0154	56.8654	33.9501	26.6324	48.8273	26.8894	18.6436	25.1948	34.3067	33.6951	YFL004W
chrVI	144985	146946		32.4969	30.991	12.5942	11.3854	14.8363	31.2619	11.9797	27.602	10.0632	6.78347	36.7406	34.1302	YFL002C
chrVI	147092	148493		42.8763	41.904	22.0131	13.3649	21.4511	39.8379	14.3903	32.1868	16.0119	12.4784	41.4132	41.9396	YFL001W
chrVI	149028	149819	1_RiBi	69.4265	67.7857	25.4365	25.9824	26.1157	57.9552	21.2119	44.2356	11.1167	12.203	61.1718	70.8353	YFR001W
chrVI	149985	152618		34.264	33.0928	26.2757	21.2875	26.2997	31.7017	16.9738	31.3953	31.4865	22.5351	36.2799	38.6069	YFR002W
chrVI	152519	153192		43.2189	44.3741	82.6845	95.4549	52.0469	24.3817	77.1299	30.0087	54.4198	69.0007	19.8831	38.9675	YFR003C
chrVI	153343	154372		74.6404	76.9344	96.0048	91.5229	41.9711	38.7438	48.1247	35.6934	33.363	82.1712	40.8111	83.2139	YFR004W
chrVI	154317	155916		45.4096	46.3723	44.7632	57.244	33.7301	39.4661	26.2702	37.6327	24.5664	19.4984	43.92	45.7064	YFR005C
chrVI	156104	157842		36.862	41.6643	57.7886	65.8776	40.2375	30.3345	41.0364	32.5426	32.8818	40.3451	36.8027	38.7041	YFR006W
chrVI	159278	160428		23.5108	26.1055	35.7254	58.741	24.2517	19.0527	35.8755	18.0523	24.4167	35.2402	18.9347	20.9609	YFR007W
chrVI	160491	161539		15.2777	16.79	22.8867	32.7866	19.7154	15.9331	22.6435	14.9495	17.9015	23.5236	13.6026	13.9872	YFR008W
chrVI	162411	164939	1_RiBi	48.2719	46.6533	35.9474	29.5048	31.0217	39.4171	29.318	40.4335	28.3145	28.5371	42.7295	50.2292	YFR009W
chrVI	164984	166658		43.8431	46.2897	58.8392	59.9269	40.5914	30.3422	41.8982	34.7608	37.4037	68.2274	33.2182	49.4079	YFR010W
chrVI	166527	167301		45.7113	49.3967	48.1509	55.413	30.9965	30.0814	19.7756	26.5898	27.3826	44.1721	31.108	43.0717	YFR011C
chrVI	169861	172360		19.7373	19.8781	19.5351	18.7305	18.9148	18.1154	21.3465	19.2581	12.456	16.44	20.9276	22.8477	YFR013W
chrVI	172343	173935		27.103	29.6047	48.7173	45.6974	27.7949	20.0627	29.4181	21.0139	43.7283	62.5552	19.6361	22.8434	YFR014C
chrVI	174127	176479		15.7183	20.1454	80.6707	17.2847	10.1871	6.06705	15.2466	7.58742	74.0008	145.898	8.4108	11.0868	YFR015C
chrVI	176990	180857		17.4606	20.0707	30.1198	24.6715	18.8233	15.3298	24.1863	16.8647	23.5529	36.2292	17.9863	18.7364	YFR016C
chrVI	182201	182938		7.74711	7.95558	45.6883	28.013	10.4941	2.80991	23.7048	5.0773	45.5073	117.978	2.81028	4.79986	YFR017C
chrVI	182988	184282		18.0912	18.9858	27.4119	24.1265	18.9627	15.4342	32.6099	16.939	17.5377	15.9739	15.0077	15.6547	YFR018C
chrVI	184491	191389		15.4082	16.3795	20.4165	20.6969	16.3223	13.1947	21.443	15.8338	13.3614	18.3765	16.4871	17.6686	YFR019W
chrVI	194717	196425		22.1791	24.5478	26.7594	32.5613	24.5386	20.1366	83.9005	23.614	18.9987	22.4576	19.6604	22.3798	YFR021W
chrVI	196545	199142		12.7394	12.2564	17.8487	26.1394	17.508	13.3696	51.1529	14.287	16.5552	15.7325	11.826	11.6998	YFR022W
chrVI	201808	203469		30.1842	30.2998	44.0024	50.7757	26.6615	18.8775	40.8871	19.6221	20.9749	38.7949	22.9473	30.9471	YFR024C-A
chrVI	203654	204789		28.2619	26.1966	40.0748	80.6139	31.7262	23.0794	61.0178	21.2678	19.8363	32.7627	22.7692	25.8877	YFR025C
chrVI	207376	208387		18.8995	22.2131	21.7211	26.9171	10.8329	9.60766	12.5687	8.82998	11.4099	21.7687	11.0935	19.8232	YFR027W
chrVI	208248	210135		35.8225	34.8633	31.0495	24.2451	26.0377	30.8187	23.7066	31.418	14.6987	18.3392	33.8822	39.0048	YFR028C
chrVI	210872	213047		22.5751	21.9104	26.3347	31.0668	23.3449	22.3175	35.4727	22.8518	13.595	21.9984	26.9822	22.4033	YFR029W
chrVI	213257	216477		26.0052	25.9971	27.572	25.5175	23.536	24.3926	27.2053	24.7876	17.7801	23.3397	27.8121	26.7719	YFR030W
chrVI	216536	220150		21.3419	21.7391	19.8288	23.9687	32.6502	31.2947	25.3501	31.9244	21.8411	11.0161	34.284	25.0135	YFR031C
chrVI	220346	221441	2_RPG	371.558	350.414	118.394	33.996	398.431	485.336	80.9636	503.434	225.402	7.55624	492.763	362.396	YFR031C-A
chrVI	223160	223973	2_RPG	552.789	565.274	194.057	58.9188	530.276	663.412	84.6243	517.135	323.848	10.4524	578.578	499.36	YFR032C-B
chrVI	223160	223792		582.038	585.902	202.786	59.9611	569.365	716.126	95.4445	573.474	361.78	10.8579	659.895	558.519	YFR032C-A
chrVI	224181	224889		153.436	163.673	221.531	169.019	237.983	156.417	232.082	161.034	215.548	257.462	147.788	155.706	YFR033C
chrVI	224790	225992		142.107	136.554	143.858	91.8206	95.8942	84.3968	102.216	74.6506	56.924	78.0933	70.0695	118.02	YFR034C
chrVI	226940	227394		35.7509	35.6352	27.0735	26.5878	30.2523	37.7991	27.1732	35.7311	32.2005	17.3966	35.1614	33.7008	YFR036W
chrVI	227393	229223		49.8762	49.3681	45.5725	39.2915	43.4224	46.135	39.7112	49.6573	32.4881	28.6671	52.9912	52.4658	YFR037C
chrVI	229379	232032		18.9682	18.6697	14.0586	11.8905	14.5719	19.5419	9.35958	19.3443	10.622	9.08157	20.1389	20.0566	YFR038W
chrVI	231943	233685		25.228	23.6386	25.989	25.8682	24.1435	23.3801	30.6375	19.9847	13.3387	18.5409	22.3661	23.9642	YFR039C
chrVI	233925	237351		40.4074	40.9207	41.1614	37.7878	35.2655	33.4113	33.7454	36.5684	36.8294	37.9703	38.4562	47.8611	YFR040W
chrVI	237272	238289		30.6403	30.3955	37.0905	43.2895	26.2809	20.8215	31.7663	22.0063	26.7049	36.195	20.242	30.7725	YFR041C
chrVI	238400	239147		25.1608	24.0339	31.4814	32.6819	24.9723	18.6391	25.0667	18.2371	27.0743	34.2077	16.6545	26.5252	YFR042W
chrVI	239937	241454		40.9462	40.4309	60.2657	88.3873	56.9682	38.221	120.208	45.3718	47.5464	54.055	38.7496	39.9285	YFR044C
chrVI	241981	243105		17.7702	19.2088	24.3436	34.7497	28.7922	20.6003	39.8953	24.0919	30.3986	25.871	17.6796	17.4417	YFR045W
chrVI	243000	244159		21.0711	21.4757	25.2207	47.9851	28.9173	26.2993	50.2834	25.4128	20.4817	15.914	21.5594	21.251	YFR046C
chrVI	244200	245210		23.1179	22.8408	29.1741	43.9275	26.5156	21.6087	43.2649	21.8773	34.4069	32.6752	20.5309	22.8279	YFR047C
chrVI	246079	248171		24.9973	23.8438	22.9652	23.5366	26.0237	25.0292	26.1661	26.5254	17.8061	18.5022	25.7884	25.1137	YFR048W
chrVI	248336	249014		24.9938	26.3982	54.869	67.2712	30.8365	12.8953	40.7218	15.1774	37.8521	58.4564	12.589	23.0341	YFR049W
chrVI	248926	249918		67.5268	67.653	88.6036	89.0565	31.1365	20.9519	46.7576	21.2828	30.5744	76.8792	18.1276	68.0613	YFR050C
chrVI	250090	251855		55.8138	54.6548	60.6548	50.3368	39.7682	34.3397	50.4507	35.2678	34.6622	47.8707	33.3127	55.5732	YFR051C
chrVI	252464	253463		65.1762	66.0249	75.5406	81.2972	34.7559	27.7052	42.1918	29.2566	41.6268	89.14	25.955	67.1735	YFR052W
chrVI	253422	255167		29.4514	44.3852	189.183	56.2614	10.1482	5.83436	23.1641	7.46522	507.215	1044.82	2.79655	14.0148	YFR053C
chrVI	264161	265614		98.9173	95.4461	330.564	603.613	248.559	61.2247	339.997	66.5964	30.2276	20.1637	70.6797	70.7477	YFR055W
chrVII	2777	4021		0	0	0	0	0	0	0	0	0	0	0	0	YGL263W
chrVII	6129	6670		0.394732	0.43464	0.320647	0.339113	0.660425	0.549834	0.670943	0.423179	0.502957	0.232089	0.556895	0.411183	YGL261C
chrVII	8231	9460		2.62725	3.37235	6.00846	15.9216	12.6519	7.74915	21.095	9.99083	26.1355	19.801	5.56897	2.96213	YGL259W
chrVII	12395	14320		22.0359	21.7097	16.6217	16.521	15.5008	21.0292	14.9014	23.203	9.78139	8.76438	23.5669	23.0682	YGL257C
chrVII	14465	16480		44.0778	43.7302	29.6737	26.1427	29.0191	48.0225	22.3839	46.6814	19.7641	17.7996	50.4423	45.2974	YGL256W
chrVII	20956	22198		25.9804	22.9273	20.5806	16.8644	43.0281	62.3187	72.3785	63.8762	20.1731	12.3613	38.1669	22.875	YGL255W
chrVII	22281	23787		47.2167	48.1159	73.1419	40.5828	25.54	29.3585	27.9571	27.8863	15.3728	25.5887	25.6594	39.3122	YGL254W
chrVII	23887	25583		182.287	179.948	272.297	116.044	95.8222	78.7357	89.1349	80.086	66.3314	172.699	93.8494	195.055	YGL253W
chrVII	25625	27543		29.8901	29.7541	44.7024	50.1406	35.7885	26.5479	43.2808	28.3048	20.2367	32.0348	27.7422	30.9644	YGL252C
chrVII	31868	32831		11.537	11.8305	18.4228	24.9956	14.4455	9.89579	26.0439	12.8124	16.6139	32.2034	9.77478	11.6001	YGL250W
chrVII	35588	36818		24.6107	26.2471	38.9337	103.931	98.1479	60.1378	213.397	61.1232	99.434	46.4589	40.4696	23.6057	YGL248W
chrVII	36912	37557		37.0198	39.2935	29.9703	30.5458	27.21	26.9868	31.0258	25.8352	23.0165	18.8707	27.0658	35.7761	YGL247W
chrVII	37496	38819		30.1441	29.826	14.8394	13.1439	15.9142	28.7029	11.4941	25.8531	15.1529	10.4408	31.8299	34.3572	YGL246C
chrVII	38976	41211		50.4	46.8158	41.8327	50.2191	39.0089	41.1896	44.9935	43.481	25.686	25.9702	49.0683	55.2485	YGL245W
chrVII	41422	43263		30.6084	33.1522	30.6906	36.0105	35.6292	31.4159	40.2669	33.1998	24.9028	28.4373	35.4739	35.2098	YGL244W
chrVII	43306	44644		17.3928	17.2476	12.8029	19.3531	18.4244	22.9811	18.6395	21.5325	14.3064	9.51999	21.3564	15.8209	YGL243W
chrVII	44525	45264		25.1348	23.9253	37.0871	55.2182	28.0855	20.0842	36.4846	20.1949	28.189	32.0708	18.6833	24.7279	YGL242C
chrVII	45412	48557		15.3227	15.4765	15.2786	15.2855	13.7092	15.0557	8.70616	14.8966	11.7261	11.4203	15.63	16.8953	YGL241W
chrVII	48611	49453		33.975	30.6437	29.9799	28.5079	19.4422	23.1276	26.6598	20.7252	16.0069	19.5317	21.2864	27.1378	YGL240W
chrVII	49508	52534		34.5791	34.8144	31.1281	21.8715	24.6385	28.4752	15.6206	32.3103	24.289	29.9597	34.6768	42.6808	YGL238W
chrVII	52363	53611	3_MSN2	23.7135	24.148	39.3041	37.563	28.0792	17.3028	30.8748	20.7014	33.4503	48.3576	19.3885	25.0162	YGL237C
chrVII	53740	55815		19.7585	18.4211	13.0097	13.6574	11.9526	16.8127	15.1104	17.4667	9.18213	7.74113	17.7489	20.0192	YGL236C
chrVII	56375	59001		38.9946	34.4593	19.1909	24.3021	25.7013	41.684	53.2444	43.0281	21.6169	10.1799	45.4454	42.1444	YGL234W
chrVII	59075	61920		16.4191	17.0368	18.5572	19.3494	16.9535	15.5988	14.9496	17.6426	16.36	21.1904	17.8308	19.5865	YGL233W
chrVII	62044	63075		30.7153	31.5879	25.1235	29.0325	27.388	34.292	21.1243	29.8946	24.0687	19.9774	35.8475	31.8928	YGL232W
chrVII	63000	63639		42.5797	40.6557	37.1652	58.3539	51.5775	55.5643	53.9419	52.1589	35.807	26.7326	47.0581	41.6157	YGL231C
chrVII	64341	67225		8.59641	9.58923	14.5084	24.9371	11.8004	8.39487	15.6054	9.62011	14.058	24.3732	7.8934	8.4871	YGL229C
chrVII	67543	69484		33.8687	33.5782	43.7808	43.6167	42.3453	34.8132	51.3574	37.8044	30.6804	41.4427	38.8673	38.2698	YGL228W
chrVII	69619	72665		12.0365	13.3329	26.9372	34.3356	24.1967	11.9005	30.4572	16.3978	27.9648	35.5398	12.8591	13.2748	YGL227W
chrVII	72610	73234		50.0622	52.8229	51.8555	50.3824	34.6466	35.5906	20.0323	27.9651	24.5155	31.2025	31.1742	46.41	YGL226C-A
chrVII	73339	73812		45.6233	50.6799	53.429	63.2233	50.8737	48.1045	62.0844	39.159	36.4385	33.9403	34.4071	38.9203	YGL226W
chrVII	76774	78020		88.8312	86.9637	67.0844	67.1413	66.2333	81.0708	85.9374	79.264	57.649	42.221	80.8659	90.9461	YGL225W
chrVII	77941	78958		25.5623	26.7015	31.756	86.1941	40.8943	31.7735	62.4779	33.1285	20.3835	20.2758	30.9894	28.4417	YGL224C
chrVII	78970	80377		22.2552	21.9029	20.5117	57.1793	23.2492	27.1144	23.7884	24.1719	13.6474	14.7499	26.9787	23.396	YGL223C
chrVII	80599	81237		53.3189	57.351	73.7925	86.0897	76.5175	60.2774	100.662	62.9386	71.6274	70.4464	52.8023	56.7241	YGL222C
chrVII	81347	82310		48.5656	43.7963	53.1623	56.9749	50.7299	48.5042	69.1592	47.1551	37.4796	38.4419	44.5273	46.4899	YGL221C
chrVII	82373	82917		46.4124	44.6498	51.0627	50.0511	42.9923	38.9649	51.0799	33.6385	36.538	42.253	34.6542	40.86	YGL220W
chrVII	82792	84281		25.411	27.202	32.0533	41.7429	29.6352	24.4618	42.0067	27.194	26.399	32.5358	27.2899	28.298	YGL219C
chrVII	84631	87638		29.3961	29.1028	26.1266	28.0099	21.2442	25.4921	24.027	23.0147	17.2068	20.4258	24.0919	28.6408	YGL216W
chrVII	87598	89638		39.4536	36.0596	24.936	24.1216	29.838	43.216	22.9248	45.0525	35.019	27.862	50.1559	50.0816	YGL215W
chrVII	89939	91282		27.9599	27.393	26.9458	30.4926	25.3993	26.0417	26.3856	27.5718	21.1749	20.3443	29.257	30.1793	YGL213C
chrVII	93751	94568		54.1071	50.5132	59.1737	75.2395	42.9807	43.8347	68.3408	42.0813	19.9881	29.4825	44.1187	54.9794	YGL210W
chrVII	95728	97123		93.7419	87.6265	151.186	74.4643	80.1666	56.3687	168.424	71.992	29.3436	58.8475	58.1266	100.182	YGL209W
chrVII	97300	98715		22.027	23.3631	36.7553	44.3377	25.8908	16.0465	46.2128	18.6608	24.9968	35.0952	17.1506	20.1524	YGL208W
chrVII	98862	102207		41.0278	41.6789	40.662	39.4348	30.8387	29.925	38.554	32.9965	24.7134	36.5253	36.7166	50.1951	YGL207W
chrVII	102253	107610		32.0575	32.3618	52.2604	48.8551	45.2707	26.8971	56.7277	37.5868	75.794	89.7634	30.1327	37.6324	YGL206C
chrVII	112387	114775		20.1796	20.4396	22.5389	29.7408	20.7641	16.3965	33.8806	19.1094	15.638	18.2306	17.9141	21.999	YGL203C
chrVII	115886	117630		47.4937	45.4436	38.4598	155.161	39.2667	41.9655	82.8962	42.877	25.443	25.5114	43.2454	52.7857	YGL202W
chrVII	117651	120977		20.379	19.2287	17.5836	17.798	18.8991	21.5534	18.5467	22.5444	12.9252	11.6275	24.6776	21.194	YGL201C
chrVII	122586	123381		71.5785	73.6055	79.7478	66.7138	40.7484	34.2852	46.5594	31.9145	32.1846	59.7019	38.6971	74.1458	YGL200C
chrVII	123568	124348		66.4549	63.6714	94.1723	92.0681	63.9145	42.5525	88.676	44.1209	64.2814	75.3808	38.1969	60.7296	YGL198W
chrVII	129817	131281		32.4432	32.4835	50.592	174.666	58.1255	39.497	153.524	37.2616	44.8164	37.0292	32.122	28.3204	YGL196W
chrVII	131481	139639		33.4102	32.4867	26.8874	17.0889	33.534	37.8903	23.6766	41.931	25.8696	18.695	41.0362	39.1763	YGL195W
chrVII	139570	140207		25.2738	25.0513	21.8022	30.087	25.4866	27.754	18.6341	28.2946	21.9168	19.91	22.0546	22.1174	YGL194C-A
chrVII	140263	141777		31.7109	30.6883	33.5859	37.1055	34.2796	34.3576	37.7594	34.9796	28.4277	31.1792	31.7181	32.7479	YGL194C
chrVII	142068	144079		33.1303	33.5798	40.1992	35.7424	38.296	32.7158	45.565	38.365	34.3031	41.3472	34.9225	39.4479	YGL192W
chrVII	144677	145443		73.6813	76.7675	116.046	104.57	129.139	98.1806	91.4875	79.8449	130.508	158.795	89.0427	75.3181	YGL191W
chrVII	145534	147944		41.7955	45.4853	45.23	45.5645	49.1716	47.8469	35.7007	54.8312	70.019	63.1071	51.712	47.7144	YGL190C
chrVII	148158	148966	2_RPG	399.6	378.65	143.375	53.5475	400.383	524.766	82.3529	439.075	272.893	35.1274	533.846	412.906	YGL189C
chrVII	148603	148999		512.116	495.293	173.44	48.6913	472.826	621.895	58.297	456.827	309.563	35.7594	541.743	477.002	YGL188C-A
chrVII	149401	150525		61.9124	69.0109	80.5734	64.992	102.886	84.7569	58.9485	81.9896	60.5882	77.3348	97.2348	75.3898	YGL187C
chrVII	150993	152843		31.9133	32.6577	31.9449	70.3239	44.1775	40.6072	71.2972	43.7781	26.0117	18.1527	44.5163	31.0038	YGL186C
chrVII	153041	154340		31.2539	30.3699	36.4111	65.5801	38.1326	37.4991	67.4851	34.0762	26.095	23.6821	34.2033	27.6814	YGL185C
chrVII	154502	156273		14.2322	12.0774	10.1403	14.408	6.14982	5.72943	20.2731	4.9954	7.89239	8.32527	5.44547	6.13805	YGL184C
chrVII	157852	159229		24.3863	23.897	38.6112	52.4432	26.6667	15.4961	43.8152	17.9981	24.9554	44.8949	15.8116	26.0082	YGL181W
chrVII	159875	163028		8.76273	9.54063	12.7831	25.1234	7.89867	7.52503	17.3986	8.61367	8.0171	20.0968	6.95965	10.587	YGL180W
chrVII	163314	165180		12.8961	13.6705	20.903	23.4271	16.98	13.7624	27.5601	15.5817	35.3659	45.0369	10.4856	12.1416	YGL179C
chrVII	166870	171108		33.1227	33.3339	28.6718	32.8897	31.0593	34.086	34.5586	37.1833	47.8831	47.1533	35.3096	37.3611	YGL178W
chrVII	174517	175446		23.9014	24.38	23.9774	27.3909	24.1262	23.5667	28.0937	23.4112	22.9495	20.9771	24.0063	24.9668	YGL174W
chrVII	175486	180444		37.7696	37.9016	44.0954	38.5402	30.9245	27.8093	27.4755	31.8357	24.5955	42.5903	31.604	48.3895	YGL173C
chrVII	180651	182213		40.1737	36.7086	36.4744	29.3419	30.3313	36.9709	23.9402	33.8794	25.2905	36.1408	38.0783	41.9542	YGL172W
chrVII	182353	184171	1_RiBi	34.7734	31.4368	3.84672	2.35087	12.5592	38.1713	5.5309	32.962	5.47954	1.59519	46.1453	41.3182	YGL171W
chrVII	185981	187545		28.1764	24.5224	10.6908	11.3634	19.7403	30.3754	25.3315	27.2174	11.4498	5.58928	32.0841	29.0301	YGL169W
chrVII	187468	190902		38.448	40.3064	44.6698	38.0513	45.0398	39.6845	48.3298	41.3237	25.0686	37.9698	40.4602	44.6215	YGL167C
chrVII	191107	191967		24.0977	20.8521	28.0562	31.0344	32.9433	23.81	67.4353	21.0059	17.3925	33.8464	22.653	22.472	YGL166W
chrVII	191890	193336		22.8529	21.4074	25.4613	34.823	30.9665	26.8674	38.5504	25.519	25.6016	22.2273	29.7812	22.5476	YGL164C
chrVII	193570	196702		15.7384	16.0514	14.4241	17.6101	13.5164	16.5317	17.1793	18.067	16.0911	15.4466	20.5782	18.984	YGL163C
chrVII	197976	199144		58.8543	52.504	43.2753	18.4336	55.2845	81.0452	43.4776	78.3959	61.7929	26.4897	74.5239	56.5865	YGL162W
chrVII	199063	200250		32.593	31.8125	51.2066	54.1561	44.6109	27.71	50.7498	33.1573	52.8462	60.7622	28.6706	32.0873	YGL161C
chrVII	200423	202407		14.8985	15.0864	23.5588	25.8223	36.9858	27.4565	34.4361	29.1336	36.7429	30.988	22.2446	16.3577	YGL160W
chrVII	202697	203916		18.219	18.7765	23.0046	37.5584	21.8797	18.958	26.1855	16.9932	15.6259	16.7443	18.5082	19.5223	YGL159W
chrVII	206881	208660		3.42331	3.28659	4.092	3.95418	4.20364	4.17622	7.68835	4.8511	9.81776	11.4974	4.66576	3.55943	YGL158W
chrVII	208897	210142		26.7171	26.0924	39.9529	49.3911	36.5246	24.7871	56.8108	29.6525	42.8994	63.0361	24.7704	26.896	YGL157W
chrVII	210347	213726		17.6241	17.2959	18.0505	30.4157	21.7465	21.0399	45.5846	23.5737	24.5477	29.7005	21.1904	18.073	YGL156W
chrVII	213941	215607		23.1278	22.3331	20.4673	19.6093	21.2642	25.3711	17.4756	24.9024	17.8319	13.0502	27.3441	24.6671	YGL155W
chrVII	215275	216099		15.1216	16.0421	19.4217	27.8265	26.2193	24.4039	30.974	24.6116	19.9825	17.9104	21.9946	16.9705	YGL154C
chrVII	216218	217347		25.5045	26.1095	27.8124	30.7752	29.9827	26.7787	33.0215	26.2852	19.9239	23.6979	25.3986	23.4691	YGL153W
chrVII	217468	221015		19.3479	19.2383	21.2841	19.6649	24.0165	21.258	20.8385	23.3091	21.263	23.4404	22.2045	21.8529	YGL151W
chrVII	220939	225762		28.5354	29.1104	29.682	37.9321	31.6056	30.0589	26.8246	33.8477	31.9589	32.1748	36.3174	32.8638	YGL150C
chrVII	226294	227634		64.7927	61.2476	31.0054	55.6287	44.157	65.1981	22.4525	63.2541	32.7439	15.98	70.8053	76.44	YGL148W
chrVII	227624	228375	2_RPG	431.865	415.26	133.705	40.0985	337.699	482.303	61.8869	507.011	262.593	41.2657	485.428	424.47	YGL147C
chrVII	228443	229773		74.4297	74.0407	34.4018	34.326	60.377	88.9904	30.2008	72.7267	34.6217	18.2085	59.522	55.9121	YGL146C
chrVII	230170	232468		14.4881	14.505	13.1807	12.8797	18.4761	20.2131	12.8977	21.2949	13.948	9.01092	19.7733	17.2398	YGL145W
chrVII	234643	235991		19.8066	19.2809	22.0921	31.1021	28.5896	24.7395	44.1635	25.6791	21.2708	16.347	23.135	20.8033	YGL143C
chrVII	236125	238163		17.7885	18.3584	21.0832	29.412	30.8174	26.7035	37.0623	25.5585	26.9614	21.5844	18.1634	15.5393	YGL142C
chrVII	238310	241214		13.0285	12.8795	20.3316	32.0296	21.1149	13.4972	31.2589	18.9297	24.8202	26.7573	12.3155	14.9312	YGL141W
chrVII	241109	245198		22.1226	20.8816	28.9676	48.6139	38.1784	27.8833	56.1183	32.5234	24.5991	23.2772	28.9692	24.6997	YGL140C
chrVII	245401	248459		16.1322	15.5304	14.2936	13.791	17.4802	17.1418	15.1606	18.9148	13.2176	11.6071	18.424	18.65	YGL139W
chrVII	249844	252910		46.6324	44.5931	47.2309	40.1051	54.8646	49.4429	52.5078	56.663	45.1033	45.0882	51.0572	53.3545	YGL137W
chrVII	252784	253927		28.6645	28.1075	26.5453	28.2576	48.8814	51.1221	38.1275	51.9999	51.3245	29.1748	43.1664	29.1585	YGL136C
chrVII	254517	255388	2_RPG	433.334	415.554	133.427	54.3811	405.531	524.472	93.9887	492.531	277.639	16.0379	505.159	409.725	YGL135W
chrVII	255565	257072		27.3997	26.9377	28.6974	28.4829	36.8819	35.2918	36.8907	38.1401	28.5183	20.2017	33.7579	28.8439	YGL134W
chrVII	257505	261689		21.1644	21.339	18.7563	20.7645	40.7495	42.8642	37.1461	48.4941	55.2789	26.2648	40.6271	26.2705	YGL133W
chrVII	261545	265930		13.3733	13.8138	15.6538	21.151	26.2042	22.6402	31.9361	25.52	25.3968	17.4304	21.3309	15.7412	YGL131C
chrVII	266083	267665		20.0251	20.4547	21.029	29.8479	39.0952	34.9928	58.0932	36.007	36.4562	21.3143	33.1953	22.0711	YGL130W
chrVII	267595	269188		22.783	22.8565	27.278	24.6101	32.2679	31.1611	32.52	29.8411	33.8966	27.054	28.962	23.9394	YGL129C
chrVII	269149	270169		29.856	28.2246	36.5277	35.3303	24.8771	20.7507	28.2016	18.9139	20.3014	30.8579	20.5101	25.3772	YGL128C
chrVII	270242	270840		49.4561	49.1523	52.8745	46.6983	32.1757	28.1341	43.1154	25.2726	31.9514	55.5036	25.5423	45.8509	YGL127C
chrVII	270960	272395		35.8497	31.9205	42.889	36.8299	23.8963	19.1218	36.373	22.3162	28.7223	36.4931	19.7347	31.5627	YGL126W
chrVII	272377	274719		32.9719	32.9354	50.1903	77.986	48.1275	37.3002	57.3748	41.8329	56.6677	59.3412	38.1171	33.1633	YGL125W
chrVII	274763	276748		15.6424	15.2786	16.2169	23.1855	31.442	32.3496	25.2628	31.74	21.5862	14.1978	28.3657	14.8297	YGL124C
chrVII	277518	278469	2_RPG	489.925	457.688	153.893	45.8935	427.874	590.515	104.037	536.145	298.267	12.7001	591.874	483.74	YGL123W
chrVII	278695	280568		80.2035	77.1516	79.2984	74.2822	51.1031	57.7996	76.1635	66.5423	40.2158	71.4375	61.9764	94.0245	YGL122C
chrVII	280743	281277		57.3875	55.5693	69.1903	92.0328	38.0375	30.4631	85.8921	27.6378	37.5691	57.3941	22.3862	46.6099	YGL121C
chrVII	281498	284002	1_RiBi	42.5793	38.7896	6.56495	5.28314	11.8624	37.9858	5.5551	34.2027	9.51853	2.52494	47.5043	51.2958	YGL120C
chrVII	284389	286080		16.1957	16.2269	10.2816	12.3547	14.307	19.2756	15.2717	19.5611	14.6289	13.8312	18.6302	16.8069	YGL119W
chrVII	288394	289421		47.3324	44.7775	50.01	206.962	39.2096	43.1468	30.1354	38.9227	33.316	26.2352	39.4989	49.7903	YGL117W
chrVII	289667	291746		32.9051	29.137	27.9348	25.9361	25.0947	27.9044	11.235	26.9861	10.1138	18.0698	34.1612	31.0005	YGL116W
chrVII	291884	293083		38.4711	39.5714	48.102	52.1019	37.0377	32.7242	39.3953	32.7769	39.0748	52.686	34.2075	40.7498	YGL115W
chrVII	293205	295701		21.0587	21.7398	23.8633	40.6596	33.5214	31.8702	45.3954	33.765	19.8855	16.8512	32.7216	23.0947	YGL114W
chrVII	295895	298160		16.0507	16.1235	12.8635	13.2253	16.3792	19.2517	14.8932	18.2211	15.2654	12.7888	22.1141	17.9741	YGL113W
chrVII	298032	299762		25.5947	23.3972	18.5215	18.3373	20.159	24.1318	17.2417	22.7059	18.1203	14.3087	27.4674	26.4824	YGL112C
chrVII	299924	301521	1_RiBi	36.8147	32.1062	7.06581	5.80814	13.4524	36.6305	8.66469	31.3829	14.8112	5.3406	44.7319	39.956	YGL111W
chrVII	303527	304165		55.8518	53.8148	53.7998	73.4668	72.3657	73.3123	70.6602	61.9825	61.8948	37.8424	55.751	49.4618	YGL108C
chrVII	304239	306331		28.0822	28.5864	26.1513	24.826	26.5753	29.5119	23.4028	30.3966	19.2241	21.7661	29.9964	29.2618	YGL107C
chrVII	306495	307258		80.4809	76.9731	80.647	83.8712	85.0899	79.8944	93.3032	72.895	46.6099	42.4845	69.1755	73.9357	YGL106W
chrVII	307371	308669	1_RiBi	85.9741	85.8027	62.9682	76.7532	75.7382	105.054	71.7893	100.116	72.6824	42.3166	110.37	94.6554	YGL105W
chrVII	308549	310188		11.1646	11.5029	18.6708	26.324	25.8582	22.4913	27.8877	27.2584	38.653	30.2353	20.1494	11.7236	YGL104C
chrVII	310929	312009	2_RPG	816.54	795.099	298.325	56.5639	911.832	992.355	143.075	1075.55	709.18	16.2968	1026.09	811.974	YGL103W
chrVII	312142	313092		60.6737	57.5658	65.5627	66.4932	90.258	82.7971	81.0163	80.7022	78.2727	38.0502	76.2348	61.2341	YGL101W
chrVII	313196	314373		28.7833	26.7937	25.9217	28.645	29.8191	30.5893	30.6546	28.639	22.5027	19.5575	26.5778	27.9487	YGL100W
chrVII	314563	316596		32.6868	29.3292	10.2701	11.2426	15.5956	32.6004	13.3403	30.4091	10.8553	3.67239	34.3076	35.9053	YGL099W
chrVII	317283	318660		24.6709	23.5561	30.2047	34.549	28.1147	22.9007	38.8478	25.6553	29.3123	20.7093	23.3015	23.3318	YGL098W
chrVII	321715	323361		43.0374	40.9428	33.4482	28.5831	53.3529	65.4928	88.2184	89.1618	76.8947	27.2301	66.1582	50.5886	YGL097W
chrVII	325285	326280		7.84708	10.0777	14.3972	24.9455	30.7245	20.4387	56.0936	39.2885	140.611	55.0612	15.9596	8.08609	YGL096W
chrVII	328780	330684		14.8431	15.9213	17.7954	19.8444	18.8778	16.2469	24.7581	18.6444	18.0184	16.0329	14.9409	15.0166	YGL095C
chrVII	330931	334653		19.7017	21.7274	23.5225	19.6285	15.4819	13.786	17.6363	15.6021	14.3968	20.7684	15.8687	24.8351	YGL094C
chrVII	334827	337678		22.7956	21.9432	28.3477	28.4782	15.624	13.327	24.0674	13.2453	15.6256	26.5349	14.6202	23.8818	YGL093W
chrVII	337770	341881		33.3056	32.3682	22.2339	18.0561	24.2081	34.2098	16.0574	36.1287	17.1282	15.7976	40.464	38.3452	YGL092W
chrVII	341897	343109		27.2602	26.8311	30.0014	34.4353	29.3353	28.4877	41.6153	25.3667	18.979	24.3029	25.7985	29.2168	YGL091C
chrVII	343277	344676		19.7897	18.0796	18.6007	21.7233	20.1038	21.2317	21.5929	20.3824	12.5042	16.0106	22.1398	22.0882	YGL090W
chrVII	346289	346963		132.443	131.714	146.436	114.673	101.156	99.2721	85.985	91.8426	93.4685	90.6346	110.4	120.71	YGL087C
chrVII	347118	349454		26.5968	26.8576	24.4796	24.0472	22.2798	24.358	15.0539	23.7824	16.0549	18.92	28.4774	30.592	YGL086W
chrVII	349557	350668		22.6902	21.3007	23.2628	32.023	26.9262	23.6819	34.3382	25.5042	32.423	21.4145	23.0984	21.2081	YGL085W
chrVII	350526	352357		19.5332	19.3151	24.3661	25.2773	20.0916	16.419	22.9185	16.8732	19.3856	27.1451	16.4339	21.2222	YGL084C
chrVII	352944	355597		22.0536	23.738	30.5119	32.1307	25.2795	20.1377	27.0927	24.6554	24.288	33.8237	20.8638	23.461	YGL083W
chrVII	355736	357133		23.03	23.5558	43.7762	40.3279	36.165	20.8928	34.934	24.7396	37.0943	48.5895	20.464	24.1849	YGL082W
chrVII	358555	359296		38.6475	40.0304	49.0113	41.3602	28.8868	24.0626	26.7228	24.1885	33.3781	38.7149	26.6452	34.8987	YGL080W
chrVII	359401	360243		27.848	29.8726	19.4953	22.7503	22.4884	30.678	17.3999	27.1219	17.1027	14.6209	30.9917	30.6854	YGL079W
chrVII	360098	361941		61.0494	59.7904	7.89749	4.3445	23.5937	83.14	10.6716	79.6757	18.0271	3.7769	97.8066	74.4318	YGL078C
chrVII	362133	364086		64.8105	64.392	50.7776	115.208	45.4057	59.6373	88.9134	66.4145	54.6989	38.3535	64.558	70.4843	YGL077C
chrVII	364225	366025	2_RPG	279.57	268.784	75.6108	30.1118	323.566	470.166	39.3867	404.916	209.53	9.57034	474.23	311.651	YGL076C
chrVII	366569	368286		98.9449	102.421	86.6391	44.5479	65.2392	82.2461	30.2669	60.835	38.8643	33.7124	64.8286	68.1258	YGL075C
chrVII	368445	371313		50.9071	49.7256	61.6301	60.0049	46.916	42.6402	53.548	37.5333	36.9988	57.3336	40.226	46.4896	YGL073W
chrVII	371549	374328		45.3069	45.1298	45.069	39.0287	48.7099	48.9981	51.4937	48.8621	34.7856	30.1608	50.4219	46.875	YGL071W
chrVII	374126	374863		72.6827	67.1344	60.9861	46.2983	50.4041	57.6988	33.5777	51.578	56.3065	49.5878	55.0288	65.9291	YGL070C
chrVII	375039	375781		63.7272	65.4616	69.6598	60.7552	51.6441	52.4161	52.6148	48.1371	58.3514	71.4288	51.3894	63.2036	YGL068W
chrVII	375993	377280		33.1387	31.6121	30.0031	32.8519	29.4338	31.0794	31.2392	28.9415	22.7862	24.0572	31.1968	29.0622	YGL067W
chrVII	377417	379812		22.4154	23.3456	23.2863	26.4658	23.5928	22.6757	22.2763	25.2865	17.6324	22.193	26.7171	26.9612	YGL066W
chrVII	379705	381326		19.3243	21.0827	22.7583	22.998	21.5957	23.3711	17.5543	21.8799	15.4342	17.263	24.859	24.668	YGL065C
chrVII	381468	383219		21.3556	21.4168	18.2867	18.7236	19.3497	20.9431	20.7576	21.0521	11.1434	12.489	20.6091	20.9381	YGL064C
chrVII	383422	384885		31.0394	31.6215	35.8122	21.2262	24.8236	20.288	28.1687	22.56	9.60579	15.0696	21.132	29.227	YGL063W
chrVII	388868	389783		21.3779	24.5952	24.6625	29.7692	18.4124	17.6787	30.3853	20.4595	9.57392	14.4197	17.8913	25.2291	YGL061C
chrVII	389934	392038		15.5398	14.6085	14.9197	17.1359	13.8167	13.4031	16.7819	14.7455	9.93055	12.9606	13.2074	15.1064	YGL060W
chrVII	393889	394726		55.693	52.0335	52.7077	57.6677	43.7134	49.6404	51.2856	42.9152	39.7999	46.7063	49.0046	54.1268	YGL058W
chrVII	394805	395835		25.3812	23.6416	24.0498	24.6721	23.7005	25.2917	24.1062	24.6539	21.3109	20.4492	23.9388	24.5331	YGL057C
chrVII	395944	397715		56.1443	52.6669	25.1227	23.1909	28.724	48.5857	27.0268	51.7298	22.4195	17.5748	64.1658	65.5776	YGL056C
chrVII	398280	400385		222.358	234.52	226.334	378.77	486.711	403.754	72.9908	153.092	148.197	37.8716	510.917	200.533	YGL055W
chrVII	400287	401367		68.8656	71.5007	62.1585	51.6212	56.4001	63.1055	28.9123	56.6499	78.1367	51.4839	59.7874	67.8541	YGL054C
chrVII	402486	403469		16.6627	17.5183	27.766	47.549	30.5528	19.3909	50.413	21.9947	39.1954	33.165	18.4529	15.8634	YGL053W
chrVII	403677	404855		23.4723	21.2351	22.9147	20.5195	19.1657	18.3335	16.423	16.0954	15.2584	14.779	18.269	18.3269	YGL051W
chrVII	405731	406736		32.4644	31.8257	30.772	32.6013	30.0707	32.3052	32.8748	30.1364	22.2085	21.4398	33.1994	30.7043	YGL050W
chrVII	406473	409777		19.6556	21.0956	23.9838	25.4416	28.6729	25.0056	34.8403	28.8424	30.4536	27.1608	27.0828	22.7064	YGL049C
chrVII	409972	411313		51.4194	53.394	68.9695	71.5904	32.013	25.3797	42.9039	27.1958	33.5529	75.1049	28.5454	58.9614	YGL048C
chrVII	411464	412203		70.7229	77.2795	102.634	88.8207	53.5388	40.1056	65.4566	40.0932	49.2299	77.2802	33.7884	58.891	YGL047W
chrVII	413763	415931	3_MSN2	16.9024	16.1744	18.7513	30.3648	45.6211	44.8411	76.8394	46.2437	81.6085	42.8804	36.8836	15.8926	YGL045W
chrVII	415864	417260		23.7313	24.6604	23.9531	25.6951	22.8537	20.0747	24.0696	21.7749	22.566	25.816	20.6937	23.8623	YGL044C
chrVII	417460	418620		45.0123	41.0544	35.086	32.3444	28.4793	39.4263	30.0117	38.252	23.915	25.5481	47.2938	50.1303	YGL043W
chrVII	418764	419411		35.4239	37.2641	47.2981	50.6419	36.1093	33.7335	33.7204	33.1436	32.1346	43.3559	33.169	36.487	YGL041W-A
chrVII	419321	420708		53.7057	51.7389	55.1712	44.7703	51.1925	54.0624	51.2498	54.292	42.8305	43.1726	54.0253	55.1283	YGL040C
chrVII	423819	425130		28.2923	28.2438	32.0221	48.1475	38.1548	37.938	49.1466	32.2933	21.9624	22.3557	38.9221	27.28	YGL039W
chrVII	425073	426848		41.8459	45.0182	50.8186	52.0641	41.7805	29.9184	51.2961	39.396	26.3371	25.5174	26.3375	37.1072	YGL038C
chrVII	427155	428066		63.2827	74.993	296.786	157.14	128.201	36.5632	142.835	60.2947	486.715	731.899	16.5178	39.3932	YGL037C
chrVII	428559	431443		17.1606	16.6283	29.8265	33.8559	36.1097	26.2951	38.3378	31.334	43.7743	51.3437	24.1415	17.2192	YGL036W
chrVII	431292	433176		40.3259	41.5082	61.7427	30.9487	16.0367	12.1453	23.2956	15.7665	15.7588	45.7033	18.3201	42.6721	YGL035C
chrVII	437401	438397	2_RPG	312.293	304.85	85.2399	23.5029	335.127	448.145	57.4981	391.353	191.282	7.21239	446.523	314.992	YGL031C
chrVII	438944	439738	2_RPG	636.998	616.979	208.018	42.9607	555.762	752.285	39.5972	611.205	322.895	5.30364	701.9	575.904	YGL030W
chrVII	439995	440658	1_RiBi	69.7798	70.6998	19.227	4.29124	30.0074	71.3163	7.68688	57.6187	29.4107	7.19736	70.82	71.4018	YGL029W
chrVII	440980	443391		152.247	169.514	137.042	162.274	161.633	173.612	70.4449	130.595	62.2842	23.7127	180.548	141.252	YGL028C
chrVII	443548	446173		26.4452	27.8885	28.2215	36.2023	32.7345	30.2469	42.0781	27.7697	16.4687	13.66	28.3079	25.7263	YGL027C
chrVII	446329	448578		41.5859	41.3366	38.7353	72.8836	38.0904	44.688	49.83	49.441	28.3424	32.9906	47.1648	50.9667	YGL026C
chrVII	448706	449994		35.842	33.9328	36.7525	38.8052	33.8583	31.9915	33.2109	33.2319	27.5542	27.976	32.5385	37.8661	YGL025C
chrVII	450068	452152		28.5499	27.1405	31.25	31.4614	28.3334	26.5834	38.2897	30.4439	25.2679	29.6418	28.5728	27.8629	YGL023C
chrVII	452309	454733		49.0906	48.0457	55.7477	48.1743	37.5546	32.6197	42.1085	36.5635	30.7854	39.8811	35.9461	49.3536	YGL022W
chrVII	454784	457171		33.1261	29.3107	41.7487	46.2666	35.3644	28.5746	24.8145	28.9976	15.1279	13.4933	36.8967	32.2363	YGL021W
chrVII	457082	457933		36.6339	36.3209	33.2286	31.2543	31.8612	33.5432	25.0998	32.4411	34.2984	24.3793	33.7619	34.7345	YGL020C
chrVII	458060	459102		46.224	45.7265	43.2819	41.095	45.2923	45.3717	42.8327	47.3576	41.6682	36.2347	47.2798	48.743	YGL019W
chrVII	458778	459698		27.493	27.2873	26.7986	26.6402	31.8755	32.2958	40.7471	35.1642	34.0444	22.6244	33.5887	26.5268	YGL018C
chrVII	459826	461453		24.7001	23.4722	19.0709	16.9722	22.8037	28.6598	28.2286	29.8208	27.433	15.5838	27.101	21.9977	YGL017W
chrVII	461596	465119		15.9912	15.3501	9.23311	5.58117	10.8896	16.0028	5.99961	15.8091	9.44476	4.79852	16.6401	16.0127	YGL016W
chrVII	465727	468903		37.1479	36.1469	31.4997	27.5871	30.529	33.8163	27.8775	38.0706	26.4985	27.2884	41.4391	43.5249	YGL014W
chrVII	469053	472432		28.2742	28.4396	30.6225	27.0969	19.5814	20.143	26.0748	19.8159	10.0692	20.9462	21.7031	32.3299	YGL013C
chrVII	472805	474373		39.6811	41.6908	50.6085	53.699	54.9194	44.1597	84.3	45.385	42.8784	54.6891	41.2856	41.6587	YGL012W
chrVII	474360	475282		76.9128	82.4577	105.382	106.756	43.3759	30.5266	52.918	32.3773	42.6404	111.629	34.5833	82.446	YGL011C
chrVII	475475	476242		47.7876	48.7632	76.3599	77.6929	37.286	25.7725	45.4352	25.959	48.3937	94.1685	24.3696	44.4165	YGL010W
chrVII	476169	478730		103.513	103.4	92.557	35.7665	28.3865	28.1353	24.9219	32.8342	12.487	35.9025	51.7769	106.57	YGL009C
chrVII	479394	482901		743.993	726.877	827.118	483.463	479.645	446.336	301.682	455.483	402.938	409.799	594.749	781.951	YGL008C
chrVII	485453	489577		13.0734	14.5077	32.0207	28.6301	21.1049	9.48615	33.8966	14.0832	42.1576	63.638	10.4941	13.3611	YGL006W
chrVII	489492	490575		22.1869	24.0355	28.6945	41.5883	24.7187	18.1899	26.2521	19.5844	23.2157	28.9199	21.4421	23.5228	YGL005C
chrVII	490740	491978		26.3225	28.4561	35.04	32.2924	25.2712	18.8249	26.1947	19.7282	34.6316	48.6792	21.3333	24.0224	YGL004C
chrVII	492325	494276		32.7319	30.7829	33.8787	31.1867	23.1687	21.771	28.4049	23.9243	18.9316	31.8019	26.8512	34.1722	YGL003C
chrVII	494405	495340		38.0953	39.1014	53.6908	65.9713	33.354	22.434	43.7847	23.2224	24.4942	36.2613	25.0171	31.2853	YGL002W
chrVII	495328	496610		37.1377	34.6899	42.4672	52.3952	77.767	68.1086	60.4065	62.7505	36.2967	28.6061	65.8079	36.856	YGL001C
chrVII	497064	498051		52.0826	50.0432	38.1372	38.8664	35.1583	47.0628	24.3493	38.0553	25.9619	24.4496	47.1794	53.2787	YGR001C
chrVII	498228	499914		30.2061	29.5625	30.5568	33.9115	34.0942	34.4417	36.6147	33.4529	32.6598	33.1425	36.4166	32.1249	YGR002C
chrVII	500103	502612		18.6626	17.2152	14.3233	15.5602	15.6706	19.2452	18.9391	17.0901	11.5833	11.8883	21.8236	20.1017	YGR003W
chrVII	502909	504574		18.7013	18.4954	16.7467	18.1831	13.0022	13.4495	12.1329	12.4786	11.1868	13.9459	16.1896	17.7882	YGR004W
chrVII	504552	505888		28.5991	28.662	29.261	29.6502	24.7647	23.9219	28.4898	21.4572	22.0281	29.883	24.247	30.3833	YGR005C
chrVII	506922	508081		50.1008	50.4272	76.2942	88.082	49.7331	37.4807	60.0883	38.9486	66.1574	111.679	39.2677	49.1183	YGR007W
chrVII	507971	508544		33.5123	43.5347	253.277	223.949	98.4166	18.8439	110.543	34.5577	382.944	756.028	14.8056	24.7608	YGR008C
chrVII	508993	511072		28.6438	30.3161	40.1982	43.51	29.4083	20.6329	42.3714	23.2446	25.3437	55.9044	25.4663	32.6974	YGR009C
chrVII	511421	513004		31.396	31.5979	41.0537	43.3273	24.0947	20.8693	29.9288	19.4953	16.6297	31.8591	23.5572	31.6685	YGR010W
chrVII	513129	514373		27.8696	26.8303	28.7564	23.9073	19.6492	19.2921	20.9617	19.0877	13.6925	20.4318	21.7047	28.9415	YGR012W
chrVII	514530	516684		45.6935	48.8508	64.1717	60.9472	39.4655	32.3856	43.4867	34.4673	25.0517	41.625	30.832	37.6476	YGR013W
chrVII	516667	520991		68.2414	67.3582	69.6876	64.2272	56.889	52.8479	64.1967	60.9594	13.095	24.2738	46.0273	71.5223	YGR014W
chrVII	520982	522094		29.8051	31.248	36.0033	36.7256	28.3204	24.5616	22.3963	22.6057	21.4216	26.1197	21.4976	27.6638	YGR015C
chrVII	522237	522989		26.8627	25.8625	29.5684	35.6408	23.6954	23.0779	20.331	19.1618	15.1625	17.01	24.6063	23.4901	YGR016W
chrVII	523532	524795		62.179	61.5848	66.6783	102.914	48.0768	48.6419	50.5453	48.1592	33.248	38.9379	58.1599	64.1857	YGR017W
chrVII	525190	526737		35.9952	40.814	124.367	276.65	93.2212	42.6292	155.733	52.6375	139.094	155.555	39.2781	28.0622	YGR019W
chrVII	526838	527441		69.5075	72.6615	81.0492	78.0991	61.2584	56.9652	56.2628	54.2854	71.7562	55.2247	53.6611	61.8775	YGR020C
chrVII	527583	528583		36.9391	35.9054	45.907	39.3056	47.661	37.502	35.7344	38.9318	49.1395	46.973	34.6487	29.8584	YGR021W
chrVII	529106	531172	3_MSN2	16.8754	18.5226	30.6356	33.7838	47.9963	37.5135	46.7071	43.0852	57.1647	64.3649	37.4625	18.8522	YGR023W
chrVII	531800	532649		40.4971	42.5957	36.6677	28.9076	35.1908	34.7981	22.7111	31.1659	31.4451	20.7616	29.4185	37.267	YGR024C
chrVII	532805	534080		44.2762	46.5902	51.7646	41.9565	54.1568	49.2736	35.8099	51.8413	63.4061	44.3357	49.1751	41.7075	YGR026W
chrVII	534068	534785	2_RPG	387.175	367.191	168.482	70.5649	412.533	524.478	87.0528	405.661	290.973	17.7223	528.027	386.988	YGR027C
chrVII	542039	543439		18.3356	18.2077	26.9323	50.0356	23.5772	17.6453	43.6016	20.8445	19.676	22.8975	17.7766	18.0048	YGR028W
chrVII	543528	544301		27.5016	29.225	36.6485	54.905	35.3951	33.5102	45.0001	30.6655	27.6398	26.0423	31.326	28.1267	YGR029W
chrVII	545432	546170		127.121	124.155	77.1345	28.5339	63.9883	105.7	13.4578	86.6602	44.0717	26.203	129.914	135.705	YGR030C
chrVII	546354	547779		41.948	41.0807	44.2091	29.099	21.2197	20.7565	35.3345	24.1809	16.9653	29.5153	23.9953	41.0977	YGR031W
[truncated: 3,046 more rows]
