# Supplementary material for: A ribosome assembly stress response regulates transcription to maintain proteome homeostasis
Source: eLife. 2019 May 24;8:e45002. doi: 10.7554/eLife.45002 (PMC6579557; doi:10.7554/eLife.45002)
Supplement: Supplementary file 7. [file elife-45002-supp7.xlsx]

## Sheet: Feuil1
Supplementary File 7
Yeast strains used in this study
		Source	Figure
W303 background; leu2-3,112 his3-11,15 ura3-1 ade2-1 trp1-1 can1-100 MATa	YDS2	(Thomas and Rothstein, 1989)	Fig2-6 sup Fig1-4
W303 background; leu2-3,112 his3-11,15 ura3-1 ade2-1 trp1-1 can1-100 MATα	YDS3	(Thomas and Rothstein, 1989)
W303 background; tor1-1 fpr1Δ::Nat RPL13A-2xFKBP12-TRP1 MATα	HHY168	(Haruki et al., 2008)
W303 background; leu2-3,112 HIS3,15 ura3-1::pADH1-OsTIR1-URA3 ADE2 trp1-1 can1-100 MATα	RP10	(Knight et al. 2014)
RP10 background; TOP2-AID*-MYC-HPH TOP1-AID-KanMX6 MATα	BEN242	This study	Fig1-2-5 Sup Fig1-2
RP10 background; TOP2-AID*-MYC-HPH TOP1-AID-KanMX6 MATa	BEN243	This study	Fig1-2-5 Sup Fig1-2
RP10 background; TOP1-AID-KanMX6 MATα	BEN240	This study	Fig1-2-5 Sup Fig1-2
RP10 background; TOP2-AID*-MYC-HPH MATα	BEN237	This study	Fig1-2
W303 background; leu2-3,112 his3-11,15 ura3-1::pADH1-OsTIR1-URA3 ade2-1 trp1-1 can1-100 MATa	BEN436	This study	Fig4 Sup Fig4
W303 background; leu2-3,112 his3-11,15 ura3-1::pADH1-OsTIR1-URA3 ade2-1 trp1-1 can1-100 TOP2-AID*-MYC-HPH TOP1-AID-KanMX6 MATa	BEN455	This study	Fig 2
HHY168 background; leu2-3,112 his3-11,15 ura3-1::pADH1-OsTIR1-URA3 ade2-1 trp1-1 can1-100 HSF1-FRB-KanMX6 MATα	BEN307	This study	Fig 1
HHY168 background; leu2-3,112 his3-11,15 ura3-1::pADH1-OsTIR1-URA3 ade2-1 trp1-1 can1-100 TOP1-AID-KanMX6 HSF1-FRB-KanMX6 MATα	BEN382	This study	Fig 1
W303 background; leu2-3,112 his3-11,15 ura3-1::pADH1-OsTIR1-URA3 ade2-1 trp1-1 can1-100 UTP8-AID*-Myc-HPH MATa	BEN434	This study	Fig 2
W303 background; leu2-3,112 his3-11,15 ura3-1::pADH1-OsTIR1-URA3 ade2-1 trp1-1 can1-100 UTP13-AID*-Myc-HPH MATα	BEN435	This study	Fig 2
HHY168 background; leu2-3,112 his3-11,15 ura3-1::pADH1-OsTIR1-URA3 ade2-1 trp1-1 can1-100 IFH1-FRB-KanMX6 MATα	YJB30	This study	Fig 4
HHY168 background; leu2-3,112 his3-11,15 ura3-1::pADH1-OsTIR1-URA3 ade2-1 trp1-1 can1-100 IFH1-FRB-KanMX6 TOP2-AID*-MYC-HPH TOP1-AID-KanMX6 MATα	BEN373	This study	Fig 4 Sup Fig4
HHY168 background; leu2-3,112 his3-11,15 ura3-1::pADH1-OsTIR1-URA3 ade2-1 trp1-1 can1-100 IFH1-FRB-KanMX6 TOP1-AID-KanMX6 MATα	BEN375	This study	Fig 4 Sup Fig4
W303 background; leu2-3,112 his3-11,15 ura3-1::pADH1-OsTIR1-URA3 ade2-1 trp1-1 can1-100 tom1-Δ MATa	BEN392	This study	Fig3
W303 background; leu2-3,112 his3-11,15 ura3-1, ifh1-S680A/T681A FHL1-HA-KanMX6 ade2-1 trp1-1 can1-100 MATa	YJM68	Albert et al.2016	Fig3
W303 background; leu2-3,112 his3-11,15 ura3-1, ifh1-6 ade2-1 trp1-1 can1-100 MATa	YVM146	Albert et al.2016	Fig3
W303 background; leu2-3,112 his3-11,15 ura3-1::pADH1-OsTIR1-URA3 ade2-1 trp1-1 can1-100 TOP2-AID*-MYC-HPH TOP1-AID-KanMX6 BTN2-envyGFP:HIS3 + Pun100-Nop1-mCherryMATa	BEN472	This study	Sup Fig2
W303 background; leu2-3,112 his3-11,15 ura3-1::pADH1-OsTIR1-URA3 ade2-1 trp1-1 can1-100 TOP2-AID*-MYC-HPH TOP1-AID-KanMX6 PRE6-envyGFP:HIS3 NOP56-mCHERRY-KANMx6 MATa	BEN533	This study	Sup Fig2
W303 background; leu2-3,112 his3-11,15 ura3-1 ade2-1 trp1-1 can1-100 Ifh1-eGFP:HIS3 MATa	BEN507	This study	Fig3
W303 background; leu2-3,112 his3-11,15 ura3-1::pADH1-OsTIR1-URA3 ade2-1 trp1-1 can1-100 TOP2-AID*-MYC-HPH TOP1-AID-KanMX6 Ifh1-envyGFP:HIS3 MATa	BEN532	This study	Fig3 Fig5
W303 background; leu2-3,112 his3-11,15 ura3-1::pADH1-OsTIR1-URA3 ade2-1 trp1-1 can1-100 TOP2-AID*-MYC-HPH TOP1-AID-KanMX6 NHP6-mCherry-NAT MATa	BEN540	This study	Fig3
W303 background; leu2-3,112 his3-11,15 ura3-1::pADH1-OsTIR1-URA3 ade2-1 trp1-1 can1-100 ifh1-ΔCter(811-1085) TOP2-AID*-MYC-HPH TOP1-AID-KanMX6MATa	BEN398	This study	Fig3
W303 background; leu2-3,112 his3-11,15 ura3-1::pADH1-OsTIR1-URA3 ade2-1 trp1-1 can1-100 TOP2-AID*-MYC-HPH TOP1-AID-KanMX6 + prs315-RPL25-envyGFP	BEN455 transformed with prs315-RPL25-EnvyGFP	This study	Fig5
W303 background; leu2-3,112 his3-11,15 ura3-1 ade2-1 trp1-1 can1-100 tom1Δ Ifh1-envyGFP:HIS3 MATa	BEN578	This study	Fig3, Sup Fig3
W303 background; leu2-3,112 his3-11,15 ura3-1 ade2-1 trp1-1 can1-100 tom1Δ MATa	BEN579	This study	Fig3
W303 background; leu2-3,112 his3-11,15 ura3-1, ifh1-S680A/T681A tom1Δ ade2-1 trp1-1 can1-100 MATa	BEN629	This study	Fig3
W303 background; leu2-3,112 his3-11,15 ura3-1, ifh1-6 tom1Δ ade2-1 trp1-1 can1-100 MATa	BEN630	This study	Fig3
