# Supplementary material for: A ribosome assembly stress response regulates transcription to maintain proteome homeostasis
Source: eLife. 2019 May 24;8:e45002. doi: 10.7554/eLife.45002 (PMC6579557; doi:10.7554/eLife.45002)
Supplement: Supplementary file 8. [file elife-45002-supp8.xlsx]

## Sheet: Table S8 Primers
Supplementary File 8
Primers used in this study
name	sequence	source	designation
BA_HSP42_f	GCAATTGTCCATATCCCACA	this study	qPCR RNAPII
BA_HSP42_r	GATATCCTTGCTGCCCTCTC	this study	qPCR RNAPII
BA_ssa4_f	ACGCCTTCTTATGTGGCTTT	this study	qPCR RNAPII
BA_ssa4_r	TCAGACGCTTAGCATCGAAT	this study	qPCR RNAPII ChIP
BK35F-RPL37A_for	CCC GTT CTC TAG GCT GAT GG	this study	qPCR Ifh1, Fhl1, Rap1 ChIP
BK35R-RPL37A_rev	GAC AGA CCG ACG GAC CAC AC	this study	qPCR Ifh1, Fhl1, Rap1 ChIP
BK36F-ACT1_for	AAG CCG GTT TTG CCG G	this study	qPCR Ifh1, Fhl1, Rap1 ChIP
BK36F-ACT1_rev	TGG TGT CTT GGT CTA CCG ACG	this study	qPCR Ifh1, Fhl1, Rap1 ChIP
BK36F-RPL30_for	CCCGTCTATTCTCGTGTCGT	this study	qPCR Ifh1, Fhl1, Rap1 ChIP
BK36F-RPL30_rev	TGCTAGATGGGGGTTCAGTC	this study	qPCR Ifh1, Fhl1, Rap1 ChIP
SK59F.RPL39_PolII	tgaaaattcgaaaaagacaagc	this study	qPCR RNAPII ChIP
SK59R.RPL39_PolII	ttgctattgatcagttcagcatc	this study	qPCR RNAPII ChIP
SK60F.RPL30_PolII	cagaccggagtgtttaagaacc	this study	qPCR RNAPII ChIP
SK60R.RPL30_PolII	ccatgaaagaataaagcgaaa	this study	qPCR RNAPII ChIP
probe 35S.5	ACGACAAGCCTACTCGAATTCGT	PMID: 20634320	northern
probe 800	GCAAAGATATGAAAACTCCAC	PMID: 28282370	northern
